# Supplementary material for: Quantitative proteomic analysis reveals posttranslational responses to aneuploidy in yeast
Source: eLife journal article supplement (doi:10.7554/elife.03023), 2014-07-29
Supplement: supp [file elife-03023-supp-v1.zip]

## Figure 2-figure supplement 2

**A**

| GO TERM                | Ribosomal subunit | Macromolecular complex |
|------------------------|-------------------|------------------------|
| P value                | 1.8E-40           | 2.7E-17                |
| # annotations in list  | 86                | 295                    |
| List                   | 486               | 486                    |
| Total # of annotations | 120               | 1,210                  |
| Total # of proteins    | 2,927             | 2,927                  |

**B**

3\*SD cutoff (57% overlap)

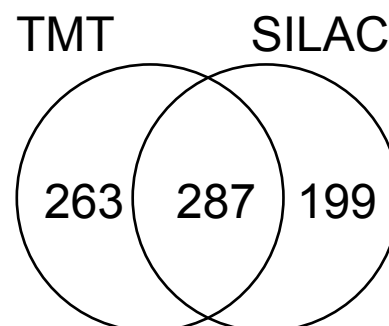

218 of 287 are in complexes
