# Supplementary material for: Quantitative proteomic analysis reveals posttranslational responses to aneuploidy in yeast
Source: eLife journal article supplement (doi:10.7554/elife.03023), 2014-07-29

## Figure 5-figure supplement 2

### A Attenuated proteins not in complexes in SILAC and TMT

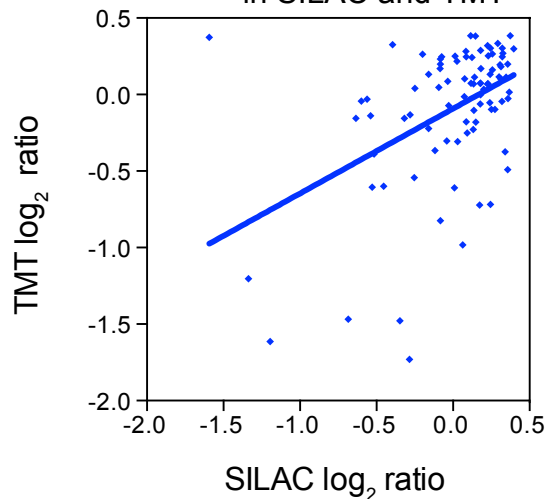

n = 88

Pearson r = 0.45

p value = 9e-5

No significant GO term enrichment

15 of 88 biological function unknown

### B

#### Protein levels of subunits per complex

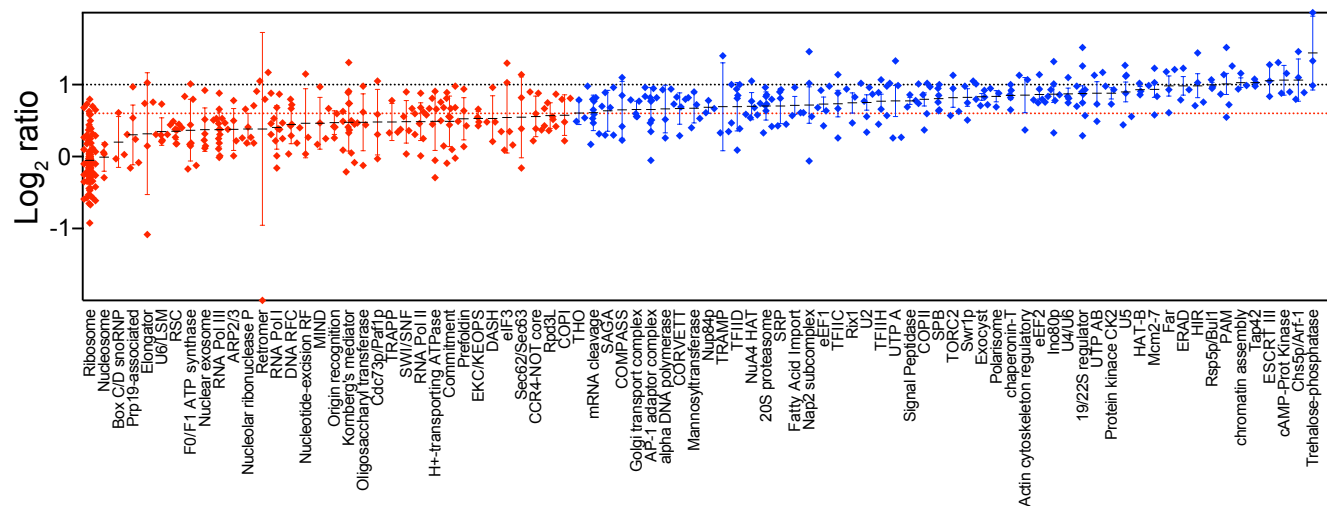

Supplement: supp [file elife-03023-supp-v1.zip]
