# Supplementary material for: Quantitative proteomic analysis reveals posttranslational responses to aneuploidy in yeast
Source: eLife journal article supplement (doi:10.7554/elife.03023), 2014-07-29

## Figure 5-figure supplement 1

**A** Protein levels of duplicated genes found in complexes

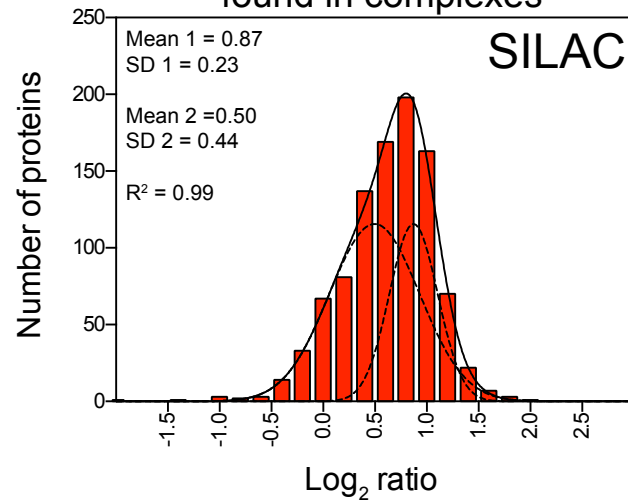

**B** Protein levels of duplicated genes not in complexes

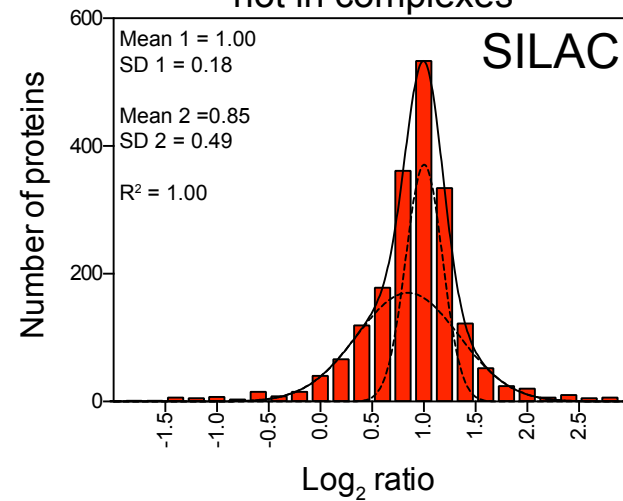

Supplement: supp [file elife-03023-supp-v1.zip]
