# Supplementary material for: Quantitative proteomic analysis reveals posttranslational responses to aneuploidy in yeast
Source: eLife journal article supplement (doi:10.7554/elife.03023), 2014-07-29
Supplement: supp [file elife-03023-supp-v1.zip]

Archive with 26 entries (26 files):
- elife_poa_e03023_Figure_2_source_data_1.xlsx
- elife_poa_e03023_Figure_6_figure_supplement_3.pdf
- elife_poa_e03023_Figure_6_source_data_1.xlsx
- elife_poa_e03023_Figure_5_figure_supplement_2.pdf
- elife_poa_e03023_Figure_4_source_data_1.xlsx
- elife_poa_e03023_Figure_8_figure_supplement_1.pdf
- elife_poa_e03023_Figure_2_figure_supplement_1.pdf
- elife_poa_e03023_Figure_2_figure_supplement_2.pdf
- elife_poa_e03023_Figure_1_source_data_1.xlsx
- elife_poa_e03023_Figure_5_source_data_1.xlsx
- elife_poa_e03023_Figure_3_figure_supplement_2.pdf
- elife_poa_e03023_Figure_1_figure_supplement_1.pdf
- elife_poa_e03023_Figure_7_figure_supplement_1.pdf
- elife_poa_e03023_Figure_2_source_data_2.xlsx
- elife_poa_e03023_Figure_3_source_data_1.xlsx
- elife_poa_e03023_Figure_4_figure_supplement_1.pdf
- elife_poa_e03023_Figure_6_figure_supplement_1.pdf
- elife_poa_e03023_Figure_6_figure_supplement_2.pdf
- elife_poa_e03023_Figure_5_figure_supplement_1.pdf
- elife_poa_e03023_Figure_7_figure_supplement_2.pdf
- elife_poa_e03023_Figure_7_source_data_1.xlsx
- elife_poa_e03023_Figure_6_figure_supplement_4.pdf
- elife_poa_e03023_Figure_1_figure_supplement_2.pdf
- elife_poa_e03023_Figure_8_source_data_1.xlsx
- elife_poa_e03023_Figure_8_figure_supplement_2.pdf
- elife_poa_e03023_Figure_3_figure_supplement_1.pdf
