# Supplementary material for: Quantitative proteomic analysis reveals posttranslational responses to aneuploidy in yeast
Source: eLife journal article supplement (doi:10.7554/elife.03023), 2014-07-29
Supplement: supp [file elife-03023-supp-v1.zip › elife_poa_e03023_Figure_1_source_data_1.xlsx]

## Sheet: SILAC
SILAC PROTEOME
					Count	3936	3922	4003	3894	3651	3902	3842	3609	4043	3937	3714	3976	3968	2927
					Median	-0.0002498	0.0012245	0.010775	0.0053945	0.0090738	0.0029345	0.014529	0.0193115	0.0313075	0.016851	0.01512	0.0204415	0.0149705	0.877996
					Mean	-0.0218713	0.0645625	0.0323484	-0.00957218	0.0646813	0.0965012	0.0656772	0.0744872	0.0784789	0.111667	0.0438567	0.0957398	0.00749627	0.80696
					STDEV	0.336939	0.420052	0.439597	0.527872	0.468003	0.484148	0.45988	0.482082	0.524927	0.544921	0.499044	0.53517	0.493138	0.547565
					Coverage	0.775414	0.772656	0.788613	0.767139	0.719267	0.768716	0.756895	0.710993	0.796493	0.775611	0.731678	0.783294	0.781718	0.576635
Protein	Gene Symbol	geneid	chromosome	Description	Wodak complexes	WT/WT	Dis I/WT	Dis II/WT	Dis V/WT	Dis VIII/WT	Dis IX/WT	Dis X/WT	Dis XI/WT	Dis XII/WT	Dis XIII/WT	Dis XIV/WT	Dis XV/WT	Dis XVI	Disomic Ratio
YAL001C	TFC3	851262	1	Largest of six subunits of the RNA polymerase III transcription initiation factor complex (TFIIIC); part of the TauB domain of TFIIIC that binds DNA at the BoxB promoter sites of tRNA and similar genes; cooperates with Tfc6p in DNA binding	transcription factor TFIIIC complex	-0.0383781	0.24261	-0.0515975	0.404177	-0.0583638	-0.082609	0.0714248	-0.270554	-0.120701	0.031128	0.125986	-0.202618	0.262956	0.24261
YAL002W	VPS8	851261	1	Membrane-associated protein that interacts with Vps21p to facilitate soluble vacuolar protein localization; component of the CORVET complex; required for localization and trafficking of the CPY sorting receptor; contains RING finger motif	CORVET complex	-0.174693	-0.001064	0.308841	-0.008294	0.0058902	0.13875	-0.305494	-0.10998	-0.0735627	-0.118264	0.048484	-0.031275	0.154071	-0.001064
YAL003W	EFB1	851260	1	Translation elongation factor 1 beta; stimulates nucleotide exchange to regenerate EF-1 alpha-GTP for the next elongation cycle; part of the EF-1 complex, which facilitates binding of aminoacyl-tRNA to the ribosomal A site	eEF1	0.0556893	0.6524	0.0489875	-0.254771	0.0643395	-0.258703	-0.091454	0.0179735	-0.0637263	-0.361276	-0.135023	-0.260064	-0.0196475	0.6524
YAL005C	SSA1	851259	1	ATPase involved in protein folding and nuclear localization signal (NLS)-directed nuclear transport; member of heat shock protein 70 (HSP70) family; forms a chaperone complex with Ydj1p; localized to the nucleus, cytoplasm, and cell wall		-0.130169	1.0579	0.345696	-0.286392	0.646802	0.243364	0.41051	0.0583105	0.107114	0.497872	0.084408	0.360091	-0.0553735	1.0579
YAL007C	ERP2	851226	1	Protein that forms a heterotrimeric complex with Erp1p, Emp24p, and Erv25p; member, along with Emp24p and Erv25p, of the p24 family involved in ER to Golgi transport and localized to COPII-coated vesicles	COPII	0.0370833	0.573199	-0.0460035	-0.288538	0.131283	-0.095694	-0.072693	0.0303375	0.0276225	-0.237978	-0.275395	-0.884918	0.151555	0.573199
YAL010C	MDM10	851223	1	Subunit of both the ERMES complex that links the ER to mitochondria, and of the mitochondrial sorting and assembly machinery (SAM complex) that functions in import and assembly of outer membrane beta-barrel proteins	mitochondrial sorting and assembly machinery complex|Mdm12p/Mmm1p/Mdm10p complex	-0.133308	0.888679	-0.0967825		0.0401048	-0.11076	-0.054351		-0.412089	-1.03939	-0.01607	-0.015929	0.213666	0.888679
YAL011W	SWC3	851222	1	Protein of unknown function, component of the SWR1 complex, which exchanges histone variant H2AZ (Htz1p) for chromatin-bound histone H2A; required for formation of nuclear-associated array of smooth endoplasmic reticulum known as karmellae	Swr1p complex	0.142094	0.718557	0.37105	0.008068		-0.075538	-0.223159	-0.403729	-0.392718	0.302178	-0.18976	-0.314129	0.0612225	0.718557
YAL012W	CYS3	851221	1	Cystathionine gamma-lyase, catalyzes one of the two reactions involved in the transsulfuration pathway that yields cysteine from homocysteine with the intermediary formation of cystathionine		0.215988	0.659672	-0.106444	0.077859	0.143348	-0.362	-0.308564	0.0521815	0.10509	-0.001082	0.211177	0.189033	-0.197916	0.659672
YAL013W	DEP1	851220	1	Transcriptional modulator involved in regulation of structural phospholipid biosynthesis genes and metabolically unrelated genes, as well as maintenance of telomeres, mating efficiency, and sporulation	Rpd3L complex	-0.107088	0.43655	-0.0333415	-0.034331	-0.21276	-0.293326	-0.192757	-0.355857	-0.269731	0.0960276	0.159721	0.037694	0.0464085	0.43655
YAL014C	SYN8	851219	1	Endosomal SNARE related to mammalian syntaxin 8		-0.442074	1.00369	-0.17152	-0.02875	-0.104764	0.250144	0.31575		0.124751	0.256704	0.164411	0.205504	0.416356	1.00369
YAL015C	NTG1	851218	1	DNA N-glycosylase and apurinic/apyrimidinic (AP) lyase involved in base excision repair; acts in both nucleus and mitochondrion; creates a double-strand break at mtDNA origins that stimulates replication in response to oxidative stress		0.0611753	1.04419	0.552592	0.562376	0.122694	0.124814		-0.12492		0.106799		0.292243	0.397342	1.04419
YAL016W	TPD3	851217	1	Regulatory subunit A of the heterotrimeric protein phosphatase 2A (PP2A), which also contains regulatory subunit Cdc55p and either catalytic subunit Pph21p or Pph22p; required for cell morphogenesis and transcription by RNA polymerase III	protein phosphatase type 2A complex (Cdc55p)|protein phosphatase type 2A complex (Rts1p)	-0.0778879	1.03163	0.0511135	0.06761	-0.045965	0.000812	-0.038824	-0.174535	-0.0075545	0.016441	0.021207	-0.012367	-0.175648	1.03163
YAL017W	PSK1	851216	1	One of two (see also PSK2) PAS domain containing S/T protein kinases; coordinately regulates protein synthesis and carbohydrate metabolism and storage in response to a unknown metabolite that reflects nutritional status		-0.165175	1.03002	0.0974015	-0.31727	-0.0361308	0.073463	0.013459	0.0171145	0.0721869	0.335351	-0.032641	0.389068	-0.0880055	1.03002
YAL019W	FUN30	851214	1	Conserved member of the Snf2p family with ATP-dependent chromatin remodeling activity; has a role in silencing; potential Cdc28p substrate; authentic, non-tagged protein is detected in purified mitochondria in high-throughput studies		-0.0268824	0.924849	0.166166	-0.027748	0.163762	-0.073734	0.124412	0.0482305	-0.0735628	-0.057214	0.017418	-0.253087	-0.247168	0.924849
YAL021C	CCR4	851212	1	Component of the CCR4-NOT transcriptional complex, which is involved in regulation of gene expression; component of the major cytoplasmic deadenylase, which is involved in mRNA poly(A) tail shortening	CCR4-NOT core complex|Cdc73p/Paf1p complex	0.0319188	0.843608	0.232623	-0.06777	-0.190969	-0.161278	-0.16654	0.0427145	-0.0881298	-0.098693	-0.358669	-0.002975	0.0442615	0.843608
YAL023C	PMT2	851210	1	Protein O-mannosyltransferase, transfers mannose residues from dolichyl phosphate-D-mannose to protein Ser/Thr residues; involved in ER quality control; acts in a complex with Pmt1p, can instead interact with Pmt5; target for new antifungal	Protein O-mannosyltransferase(Pmt1p/Pmt2p)	-0.066825	0.897039	-0.286139	-0.267342	0.0203104	-0.140566	-0.077755	0.0039355	-0.0272157	0.004882	-0.360173	-0.499888	-0.0442775	0.897039
YAL024C	LTE1	851209	1	Protein similar to GDP/GTP exchange factors but without detectable GEF activity; required for asymmetric localization of Bfa1p at daughter-directed spindle pole bodies and for mitotic exit at low temperatures	Kel1p/Kel2p/Lte1p complex	0.0479093	0.965137	0.0322375	-0.036321	0.0716471	-0.174108	-0.077007	-0.129712	-0.157862	-0.228483	-0.442373	-0.018382	0.126683	0.965137
YAL025C	MAK16	851208	1	Essential nuclear protein, constituent of 66S pre-ribosomal particles; required for maturation of 25S and 5.8S rRNAs; required for maintenance of M1 satellite double-stranded RNA of the L-A virus		0.0910383	0.852704	0.0231505	-0.111668	0.0010279	-0.020001	0.0900753	0.187961	0.0319009	0.0844334	0.026165	-0.350333	0.0811625	0.852704
YAL026C	DRS2	851207	1	Aminophospholipid translocase (flippase) that maintains membrane lipid asymmetry in post-Golgi secretory vesicles; contributes to clathrin-coated vesicle formation and endocytosis; mutations in human homolog ATP8B1 result in liver disease		-0.0516991	0.894381	-0.0719729	0.451331	0.128119	0.181457	0.294583	-0.20448	-0.0430954	0.156286	0.367088	-0.06383	0.0868755	0.894381
YAL029C	MYO4	851204	1	One of two type V myosin motors (along with MYO2) involved in actin-based transport of cargos; required for mRNA transport, including ASH1 mRNA, and facilitating the growth and movement of ER tubules into the growing bud along with She3p		0.0024804	0.941593	0.0489495	-0.173653	0.278646	-0.086743	0.101277	0.0720375	-0.0122317	-0.090605	-0.260737	-0.063416	-0.176744	0.941593
YAL030W	SNC1	851203	1	Vesicle membrane receptor protein (v-SNARE) involved in the fusion between Golgi-derived secretory vesicles with the plasma membrane; proposed to be involved in endocytosis; member of the synaptobrevin/VAMP family of R-type v-SNARE proteins	SNARE complex	-0.0831544	0.710907	0.0639355	-0.771732	-0.129478	0.128889	0.0445775	0.0754355	-0.277946		-0.266018	0.33874	0.262135	0.710907
YAL031C	GIP4	851202	1	Cytoplasmic Glc7-interacting protein whose overexpression relocalizes Glc7p from the nucleus and prevents chromosome segregation; potential Cdc28p substrate		0.0909503	1.20244	0.0388515	-0.209373	-0.863921	0.360777	0.081723	-0.242462	-0.152916	0.133425	-0.497141	0.113208	0.221412	1.20244
YAL032C	PRP45	851201	1	Protein required for pre-mRNA splicing; associates with the spliceosome and interacts with splicing factors Prp22p and Prp46p; orthologous to human transcriptional coactivator SKIP and can activate transcription of a reporter gene		-0.078763	0.448107	0.139072	-0.066627	-0.14132	-0.204166	-0.282495		0.12246	-0.005662	-0.049106	0.003107	0.299357	0.448107
YAL033W	POP5	851200	1	Subunit of both RNase MRP, which cleaves pre-rRNA, and nuclear RNase P, which cleaves tRNA precursors to generate mature 5' ends	nucleolar ribonuclease P complex|ribonuclease MRP complex		0.329547	0.108658	0.124221	0.346559	-0.190153			0.19442		-0.335148	-0.174419	-0.0692855	0.329547
YAL034W-A	MTW1	851197	1	Essential component of the MIND kinetochore complex (Mtw1p Including Nnf1p-Nsl1p-Dsn1p) which joins kinetochore subunits contacting DNA to those contacting microtubules; critical to kinetochore assembly	MIND complex	-0.161714	0.939627	-0.152844	-0.049276	-0.0519386	-0.052825		-0.141208	-0.0492072		-3.79045		0.221462	0.939627
YAL035W	FUN12	851196	1	GTPase, required for general translation initiation by promoting Met-tRNAiMet binding to ribosomes and ribosomal subunit joining; homolog of bacterial IF2		0.0123057	0.991035	0.102913	-0.083834	-0.0065912	-0.092515	-0.018937	0.0724195	0.319056	-0.008421	0.242519	-0.363019	-0.0324265	0.991035
YAL036C	RBG1	851195	1	Member of the DRG family of GTP-binding proteins; associates with translating ribosomes; interacts with Tma46p, Ygr250cp, Gir2p and Yap1p via two-hybrid		0.0677123	0.29328	-0.0402345	0.080999	-0.188164	-0.142027	-0.006414	0.0217275	0.0373099	-0.16699	-0.27293	0.134421	-0.0172785	0.29328
YAL038W	CDC19	851193	1	Pyruvate kinase, functions as a homotetramer in glycolysis to convert phosphoenolpyruvate to pyruvate, the input for aerobic (TCA cycle) or anaerobic (glucose fermentation) respiration		-0.0086869	0.791708	-0.0365855	-0.223199	0.0476308	-0.042173	-0.078826	-0.208474	0.007584	-0.243926	-0.33115	-0.647991	-0.0952525	0.791708
YAL039C	CYC3	851192	1	Cytochrome c heme lyase (holocytochrome c synthase), attaches heme to apo-cytochrome c (Cyc1p or Cyc7p) in the mitochondrial intermembrane space; human ortholog may have a role in microphthalmia with linear skin defects (MLS)		-0.10761	1.25901	0.0887305	0.099875	0.392426	0.519408		0.643606	0.401378	-0.486363		0.849866	0.0984695	1.25901
YAL041W	CDC24	851190	1	Guanine nucleotide exchange factor (GEF or GDP-release factor) for Cdc42p; required for polarity establishment and maintenance, and mutants have morphological defects in bud formation and shmooing	Cdc24p/Far1p/Gbetagamma protein complex	-0.00179	1.11171	0.0148745	0.009407	0.0695436	0.15836	-0.018848	-0.254229	0.0387704	0.030909	-0.33817	-0.192828	0.0221735	1.11171
YAL042W	ERV46	851256	1	Protein localized to COPII-coated vesicles, forms a complex with Erv41p; involved in the membrane fusion stage of transport	COPII|Erv41p/Erv46p complex	0.0127003	0.763645	-0.0917043	0.029252	0.0918977	-0.091908	0.217903	0.174299	-0.29767	-0.116335	-0.224677	-0.151204	0.201209	0.763645
YAL043C	PTA1	851255	1	Subunit of holo-CPF, a multiprotein complex and functional homolog of mammalian CPSF, required for the cleavage and polyadenylation of mRNA and snoRNA 3' ends; involved in pre-tRNA processing; binds to the phosphorylated CTD of RNAPII	mRNA cleavage and polyadenylation specificity factor complex	0.0490553	0.601099	0.0959985	0.100744	-0.0128544	0.000542	0.041513	0.0335105	-0.13318	0.046434	0.119669	-0.208336	0.0761305	0.601099
YAL044C	GCV3	851254	1	H subunit of the mitochondrial glycine decarboxylase complex, required for the catabolism of glycine to 5,10-methylene-THF; also required for all protein lipoylation; expression is regulated by levels of 5,10-methylene-THF	glycine cleavage complex	-0.0240061	1.00189	-0.236831	1.02742	0.387537	0.698859	-0.355394	0.629995	0.2042	0.15403	1.2014	0.406859	-0.214768	1.00189
YAL044W-A	YAL044W-A	851252	1	Putative protein of unknown function; similar to S. pombe uvi31 which is a putative DNA repair protein		0.195756	0.828034	0.0838605	0.161836	-0.107187	-0.027296	-0.107125	0.479352	-0.130848	-0.16207	-0.043278	0.194581	0.185184	0.828034
YAL046C	AIM1	851251	1	Protein involved in mitochondrial function or organization; null mutant displays elevated frequency of mitochondrial genome loss		0.222182	1.00268	0.407579	0.165845	0.0525979	0.17171	-0.031602	0.810045	-0.639085	-0.044263	0.242354	0.492328	-0.0042895	1.00268
YAL047C	SPC72	851250	1	Component of the cytoplasmic Tub4p (gamma-tubulin) complex, binds spindle pole bodies and links them to microtubules; has roles in astral microtubule formation and stabilization	SPB components	-0.0133968	0.962762	0.0885535	-0.058414	0.232736		0.020872	-0.0225615	-0.293789	-0.150649	-0.230741	-0.018781	-0.0653335	0.962762
YAL048C	GEM1	851249	1	Evolutionarily-conserved tail-anchored outer mitochondrial membrane GTPase which regulates mitochondrial morphology; cells lacking Gem1p contain collapsed, globular, or grape-like mitochondria; not required for pheromone-induced cell death		0.0263332	1.15144	0.246845	0.273476	0.0526116	-0.316383	0.161645	-0.2933	0.0620819	-0.924653	1.74484	-0.109165	0.109729	1.15144
YAL049C	AIM2	851248	1	Cytoplasmic protein involved in mitochondrial function or organization; null mutant displays reduced frequency of mitochondrial genome loss; potential Hsp82p interactor		-0.185628	1.32664	0.0992635	-0.542425	0.116075	0.313553	0.0806173	0.119011	-0.211251	0.421156	-0.514948	0.196505	0.197278	1.32664
YAL051W	OAF1	851247	1	Oleate-activated transcription factor, acts alone and as a heterodimer with Pip2p; activates genes involved in beta-oxidation of fatty acids and peroxisome organization and biogenesis	OAF complex	0.0117054	0.971585	0.276276	0.057766	0.0756849	-0.008595	0.233243		-0.136251	0.057615	-0.061216	0.02413	0.237725	0.971585
YAL053W	FLC2	851246	1	Putative FAD transporter; required for uptake of FAD into endoplasmic reticulum; involved in cell wall maintenance		-0.182376	0.783322	-0.0356945	-0.282583	0.338485	0.436314	0.347734	0.290649	0.654259	-0.003896	-0.034974	0.540879	0.295082	0.783322
YAL054C	ACS1	851245	1	Acetyl-coA synthetase isoform which, along with Acs2p, is the nuclear source of acetyl-coA for histone acetlyation; expressed during growth on nonfermentable carbon sources and under aerobic conditions			2.77494	-0.914569				1.01478		4.02528	1.46592	-1.02484	-0.060921	0.0479795	2.77494
YAL056W	GPB2	851243	1	Multistep regulator of cAMP-PKA signaling; inhibits PKA downstream of Gpa2p and Cyr1p, thereby increasing cAMP dependency; inhibits Ras activity through direct interactions with Ira1p/2p; regulated by G-alpha protein Gpa2p; homolog of Gpb1p		-0.0838148	1.19381	0.22115	0.106843	5.01063	0.251281	-0.209595	-0.26901				0.0860653		1.19381
YAL058W	CNE1	851241	1	Calnexin; integral membrane ER chaperone involved in folding and quality control of glycoproteins; chaperone activity is inhibited by Mpd1p, with which Cne1p interacts; 24% identical to mammalian calnexin; Ca+ binding not yet shown in yeast		0.030031	0.684504	-0.117337	-0.315492	-0.246666	-0.216452	0.128738	-0.219902	0.0833609	0.00191	0.462564	-0.00595	-0.142094	0.684504
YAL059W	ECM1	851240	1	Pre-ribosomal factor involved in 60S ribosomal protein subunit export; associates with the pre-60S particle; shuttles between the nucleus and cytoplasm		0.10321	0.976612	0.0571195	-0.3399	0.0594869	0.054528	0.0858549	0.327902	0.162382	0.040101	-0.036437	-0.410942	0.0150645	0.976612
YAL060W	BDH1	851239	1	NAD-dependent (R,R)-butanediol dehydrogenase, catalyzes oxidation of (R,R)-2,3-butanediol to (3R)-acetoin, oxidation of meso-butanediol to (3S)-acetoin, and reduction of acetoin; enhances use of 2,3-butanediol as an aerobic carbon source		0.0677783	0.976626	-0.451912	0.349412	-0.442197	-0.378513	-1.20136	-0.268004	-0.435695	-0.007491	0.32426	-0.083116	-0.420934	0.976626
YAL062W	GDH3	851237	1	NADP(+)-dependent glutamate dehydrogenase, synthesizes glutamate from ammonia and alpha-ketoglutarate; rate of alpha-ketoglutarate utilization differs from Gdh1p; expression regulated by nitrogen and carbon sources		0.112165	0.98327	-1.89393	-0.274272	-0.0889297	-0.147226	-0.261359	0.259668	0.836404	1.79863	0.139064	0.604494	-0.52039	0.98327
YAR002C-A	ERP1	851264	1	Protein that forms a heterotrimeric complex with Erp2p, Emp24p, and Erv25p; member, along with Emp24p and Erv25p, of the p24 family involved in ER to Golgi transport and localized to COPII-coated vesicles	COPII	-0.0090205	0.402174	-0.129812	-0.232091	0.050754	0.093148	0.0557823	0.148091	0.0994469	-0.128397	-0.285333	-0.158428	0.153006	0.402174
YAR002W	NUP60	851263	1	Subunit of the nuclear pore complex (NPC), functions to anchor Nup2p to the NPC in a process controlled by the nucleoplasmic concentration of Gsp1p-GTP; involved in nuclear export and cytoplasmic localization of specific mRNAs such as ASH1		0.0662603	0.40632	-0.0282865	-0.055831	-0.103418	-0.153011	-0.158099	-0.211784	0.0909869	-0.288722	0.051766	-0.271702	-0.0152065	0.40632
YAR007C	RFA1	851266	1	Subunit of heterotrimeric Replication Protein A (RPA), which is a highly conserved single-stranded DNA binding protein involved in DNA replication, repair, and recombination	DNA replication factor A complex	0.0226517	0.77116	0.219558	-0.074078	-0.149598	-0.058529	-0.125667	-0.0364055	-0.0795902	-0.140203	-0.135426	0.022026	0.190122	0.77116
YAR008W	SEN34	851267	1	Subunit of the tRNA splicing endonuclease, which is composed of Sen2p, Sen15p, Sen34p, and Sen54p; Sen34p contains the active site for tRNA 3' splice site cleavage and has similarity to Sen2p and to Archaeal tRNA splicing endonuclease	tRNA-intron endonuclease complex	-0.243		0.285176	-1.53137		0.001073	-0.247457	0.214075	0.446074	-0.062415	0.000954	-0.09127	0.0673915
YAR014C	BUD14	851271	1	Protein involved in bud-site selection, Bud14p-Glc7p complex is a cortical regulator of dynein; inhibitor of the actin assembly factor Bnr1p (formin); diploid mutants display a random budding pattern instead of the wild-type bipolar pattern	Bud14p/Glc7p complex	0.0421903	0.959541	-0.168495	0.091	0.0227404	-0.321427	-0.218789	0.190957	-0.200264	-0.140616	0.280701	0.204869	-0.253808	0.959541
YAR018C	KIN3	851273	1	Nonessential protein kinase with unknown cellular role		-1.11964	1.10035	0.233442	-0.125043	-0.190189	0.002997	0.005131	0.0719135	0.270206	0.335684		0.225876	0.0770285	1.10035
YAR019C	CDC15	851274	1	Protein kinase of the Mitotic Exit Network that is localized to the spindle pole bodies at late anaphase; promotes mitotic exit by directly switching on the kinase activity of Dbf2p; required for spindle disassembly after meiosis II		-0.0669512	0.25097	0.0673665	0.16726		0.261419				-0.164547		0.199939	0.143217	0.25097
YAR027W	UIP3	851279	1	Putative integral membrane protein of unknown function; interacts with Ulp1p at the nuclear periphery; member of DUP240 gene family		-0.143912	0.747144	-0.342307	1.70354	0.548898	0.16915	0.523024		0.919107	-0.894153		-0.097584	0.736417	0.747144
YAR028W	YAR028W	851280	1	Putative integral membrane protein, member of DUP240 gene family; GFP-fusion protein is induced in response to the DNA-damaging agent MMS		0.0813673	0.121131	-0.327647	-0.666939	0.0574913	0.012079	-0.274742	-0.265494	0.192325	-0.349364	0.010686	0.716217	0.840483	0.121131
YAR031W	PRM9	851282	1	Pheromone-regulated protein with 3 predicted transmembrane segments and an FF sequence, a motif involved in COPII binding; member of DUP240 gene family		-0.236877	0.148973		0.139534	0.708568	0.229424	0.382131	-0.107671		0.292475	0.690164	-0.646578	0.0592545	0.148973
YAR035W	YAT1	851285	1	Outer mitochondrial carnitine acetyltransferase, minor ethanol-inducible enzyme involved in transport of activated acyl groups from the cytoplasm into the mitochondrial matrix; phosphorylated		0.28748		1.76769	0.565212		0.791939	0.046802		0.464212	0.451715		0.514657
YAR042W	SWH1	851286	1	Protein similar to mammalian oxysterol-binding protein; contains ankyrin repeats; localizes to the Golgi and the nucleus-vacuole junction	Swh1p/Nvj1p complex	0.0348572	1.08472	-0.159307	-0.049391	0.187133	-0.010607	0.153713	0.0435805	0.114576	-0.214549	-0.401259	0.108379	-0.0028155	1.08472
YAR071W	PHO11	851299	1	One of three repressible acid phosphatases, a glycoprotein that is transported to the cell surface by the secretory pathway; induced by phosphate starvation and coordinately regulated by PHO4 and PHO2		0.406678	0.474349	-0.20821	-0.408238	1.01153	-0.924323	-0.42651	0.338126	0.726847	-3.28364	-1.89985	-1.26479	-1.28859	0.474349
YAR073W	IMD1	851300	1	Nonfunctional protein with homology to IMP dehydrogenase; probable pseudogene, located close to the telomere; is not expressed at detectable levels; YAR073W and YAR075W comprise a continuous reading frame in some strains of S. cerevisiae		0.416295	0.244135	-0.385417	-0.660956	-0.704783	-0.462418	-0.791203	-0.0310495	-1.1715	-1.80375	0.420922	-0.389055	-0.594566	0.244135
YAR075W	YAR075W	851301	1	Non-functional protein with homology IMP dehydrogenase; YAR073W/IMD1 and YAR075W comprise a continuous reading frame in some strains of S. cerevisiae.		0.238859	0.134287	-0.019751	-0.664702	-0.587839	-0.3364	-0.267473	0.0167715	0.0991776	-0.622657	0.083138	-0.437709	-0.564007	0.134287
YBL002W	HTB2	852284	2	Histone H2B, core histone protein required for chromatin assembly and chromosome function; nearly identical to HTB1; Rad6p-Bre1p-Lge1p mediated ubiquitination regulates transcriptional activation, meiotic DSB formation and H3 methylation	Nucleosomal protein complex	-0.0763931	0.181663	0.051145	0.022575	-0.449273	-0.0066885	-0.248752	-0.29653	-0.4812	0.241124	-0.329307	-0.11297	0.179168	0.051145
YBL003C	HTA2	852283	2	Histone H2A, core histone protein required for chromatin assembly and chromosome function; one of two nearly identical (see also HTA1) subtypes; DNA damage-dependent phosphorylation by Mec1p facilitates DNA repair; acetylated by Nat4p	Nucleosomal protein complex	-0.0080797	-0.02806	0.161974	0.029021	-0.549262	-0.0548395	-0.416727	-0.074248	-0.631643	0.159744	-0.190946	-0.11332	0.244179	0.161974
YBL004W	UTP20	852282	2	Component of the small-subunit (SSU) processome, which is involved in the biogenesis of the 18S rRNA		-0.064494	0.166593	0.925983	-0.030814	0.265103	0.152533	0.699572	0.0261305	0.283855	0.222801	0.005874	-0.218077	-0.0379455	0.925983
YBL006C	LDB7	852277	2	Component of the RSC chromatin remodeling complex; interacts with Rsc3p, Rsc30p, Npl6p, and Htl1p to form a module important for a broad range of RSC functions	RSC complex	0.0045455	0.043677	0.173001	0.02986	-0.342708	-0.510106	-0.066376	-0.482804	0.314512	-0.59244	0.485862	-0.112681	0.218244	0.173001
YBL007C	SLA1	852276	2	Cytoskeletal protein binding protein required for assembly of the cortical actin cytoskeleton; interacts with proteins regulating actin dynamics and proteins required for endocytosis; found in the nucleus and cell cortex; has 3 SH3 domains	actin cytoskeleton-regulatory complex, Pan1p/Sla1p/End3p complex	-0.106948	0.047541	1.12731	0.215037	-0.0038149	0.067499	-0.136094	-0.112016	-0.17283	0.155426	0.404777	-0.030412	0.14576	1.12731
YBL008W	HIR1	852275	2	Subunit of the HIR complex, a nucleosome assembly complex involved in regulation of histone gene transcription; contributes to nucleosome formation, heterochromatic gene silencing, and formation of functional kinetochores	HIR complex	0.0028515	0.103686	0.657199	-0.157275	0.299474		0.118911	0.11658	-0.134822	-0.135265	0.2816	0.471473	0.12581	0.657199
YBL009W	ALK2	852274	2	Protein kinase; accumulation and phosphorylation are periodic during the cell cycle; phosphorylated in response to DNA damage; contains characteristic motifs for degradation via the APC pathway; similar to Alk1p and to mammalian haspins		0.143117		0.526151		-0.575943	-1.40112				-0.205624	0.295701	-0.549826	0.887674	0.526151
YBL010C	YBL010C	852273	2	Putative protein of unknown function; green fluorescent protein (GFP)-fusion protein colocalizes with clathrin-coated vesicles		0.108046		0.418288	-0.161787					-0.0890971			0.431034	-0.0296045	0.418288
YBL011W	SCT1	852271	2	Glycerol 3-phosphate/dihydroxyacetone phosphate dual substrate-specific sn-1 acyltransferase of the glycerolipid biosynthesis pathway, prefers 16-carbon fatty acids, similar to Gpt2p, gene is constitutively transcribed		-0.063683	0.032016	1.07329	-0.048086	-0.160538	0.192045	-0.043314	0.121762	-0.312924	0.255711	0.287552	0.101234	0.0328235	1.07329
YBL015W	ACH1	852266	2	Protein with CoA transferase activity, particularly for CoASH transfer from succinyl-CoA to acetate; has minor acetyl-CoA-hydrolase activity; phosphorylated; required for acetate utilization and for diploid pseudohyphal growth		-0.324054	1.09853	0.843883	-1.21773	0.732704	1.03965	0.83978	0.0848965	0.59768	1.07828	-0.490479	0.778369	-0.843794	0.843883
YBL016W	FUS3	852265	2	Mitogen-activated serine/threonine protein kinase involved in mating; phosphoactivated by Ste7p; substrates include Ste12p, Far1p, Bni1p, Sst2p; inhibits invasive growth during mating by phosphorylating Tec1p, promoting its degradation	STE5-MAPK complex	0.132178	-0.20185	0.749834	0.010714	-0.226703	-0.245069	-0.384457	0.0498345	0.213513	-0.349875	0.035103	0.430006	-0.0786945	0.749834
YBL017C	PEP1	852264	2	Type I transmembrane sorting receptor for multiple vacuolar hydrolases; cycles between the late-Golgi and prevacuolar endosome-like compartments		-0.110326	-0.026227	0.885923	-0.079107	0.265468	0.008285	0.050234	-0.369121	-0.11808	0.121318	0.111665	-0.128643	0.11591	0.885923
YBL018C	POP8	852263	2	Subunit of both RNase MRP, which cleaves pre-rRNA, and nuclear RNase P, which cleaves tRNA precursors to generate mature 5' ends	nucleolar ribonuclease P complex|ribonuclease MRP complex	0.165871	0.062958	0.659887	0.141146	0.514176	0.207956			0.034726	0.047446		-0.242922	0.116092	0.659887
YBL022C	PIM1	852259	2	ATP-dependent Lon protease, involved in degradation of misfolded proteins in mitochondria; required for biogenesis and maintenance of mitochondria		0.0502033	0.121372	1.4301	-0.056724	0.269573	0.281548	0.167115	0.305149	-0.0525669	0.247871	0.501233	0.371384	0.0269615	1.4301
YBL023C	MCM2	852258	2	Protein involved in DNA replication; component of the Mcm2-7 hexameric complex that binds chromatin as a part of the pre-replicative complex	Mcm2-7 complex	0.0700553	-0.055322	0.839963	-0.084524	-0.0913348	-0.153551	-0.148991	-0.15069	-0.358793	-0.102402	0.187222	-0.08498	0.0794135	0.839963
YBL024W	NCL1	852257	2	S-adenosyl-L-methionine-dependent tRNA: m5C-methyltransferase, methylates cytosine to m5C at several positions in tRNAs and intron-containing pre-tRNAs; similar to Nop2p and human proliferation associated nucleolar protein p120		-0.0356666	-0.012982	1.12798	-0.017302	-0.166994	-0.087103	-0.025503	-0.0243395	0.0543149	0.016272	-0.089776	-0.359459	0.0509445	1.12798
YBL026W	LSM2	852255	2	Lsm (Like Sm) protein; part of heteroheptameric complexes (Lsm2p-7p and either Lsm1p or 8p): cytoplasmic Lsm1p complex involved in mRNA decay; nuclear Lsm8p complex part of U6 snRNP and possibly involved in processing tRNA, snoRNA, and rRNA	U6 snRNP complex|U4/U6 x U5 tri-snRNP complex	-0.0242185	0.054128	0.175752	0.084734	-0.0299751	0.050512	0.223478	0.0022765	0.162431	-0.069456	-0.143324	0.018646	0.172432	0.175752
YBL027W	RPL19B	852254	2	Protein component of the large (60S) ribosomal subunit, nearly identical to Rpl19Ap and has similarity to rat L19 ribosomal protein; rpl19a and rpl19b single null mutations result in slow growth, while the double null mutation is lethal	cytoplasmic ribosomal large subunit	0.0393802	-0.010405	-0.017362	-0.287714	-0.0666572	-0.0669665	0.0136745	0.189572	-0.0600701	-0.169914	-0.253884	-0.433312	-0.148942	-0.017362
YBL028C	YBL028C	852253	2	Protein of unknown function that may interact with ribosomes; green fluorescent protein (GFP)-fusion protein localizes to the nucleolus; predicted to be involved in ribosome biogenesis				0.507015	-0.439859	-0.134396	-0.261325	0.221881		0.0231564	-0.003123	0.563938	-0.07542	0.199836	0.507015
YBL029C-A	YBL029C-A	852251	2	Protein of unknown function; green fluorescent protein (GFP)-fusion protein localizes to the cell periphery; has potential orthologs in Saccharomyces species and in Yarrowia lipolytica		-0.0193793	0.155877	1.28429	-0.072435	-0.265274	0.009952	0.0710289	0.0783745	-0.159808	0.11499	-0.522288	0.438378	-0.299599	1.28429
YBL030C	PET9	852250	2	Major ADP/ATP carrier of the mitochondrial inner membrane, exchanges cytosolic ADP for mitochondrially synthesized ATP; also imports heme and ATP; phosphorylated; required for viability in many lab strains that carry a sal1 mutation		-0.0743088	0.406782	1.16514	-0.253613	-0.0091339	0.55557	0.245836	0.714376	-0.696049	0.470799	-0.355916	0.756763	-0.149275	1.16514
YBL031W	SHE1	852249	2	Mitotic spindle protein that interacts with components of the Dam1 (DASH) complex, its effector Sli15p, and microtubule-associated protein Bim1p; also localizes to nuclear microtubules and to the bud neck in a ring-shaped structure		-0.30135	-0.331863	0.728253			-2.25212	0.238481	0.0171285	0.273069	-0.079579	0.120229	-0.192683	0.117781	0.728253
YBL032W	HEK2	852248	2	RNA binding protein involved in the asymmetric localization of ASH1 mRNA; represses translation of ASH1 mRNA, an effect reversed by Yck1p-dependent phosphoryation; regulates telomere position effect and length; similarity to hnRNP-K		-0.130528	-0.237549	0.902914	0.010207	-0.252463	-0.043805	-0.117	0.0207145	-0.476609	0.0537	0.196497	-0.068099	0.0103885	0.902914
YBL033C	RIB1	852247	2	GTP cyclohydrolase II; catalyzes the first step of the riboflavin biosynthesis pathway		-0.238013	0.229732	1.22751	0.607669	0.375029	0.13233	-0.1259	0.205226	-0.0399806	0.143286	0.117875	-0.072137	-0.196045	1.22751
YBL034C	STU1	852246	2	Component of the mitotic spindle that binds to interpolar microtubules via its association with beta-tubulin (Tub2p); required for interpolar microtubules to provide an outward force on the spindle poles		-0.0658616	0.062917	1.23986	-0.143634	0.0584153	-0.084375	0.0661145	0.0201815	-0.135272	-0.225362	-0.156524	-0.062424	0.0949275	1.23986
YBL035C	POL12	852245	2	B subunit of DNA polymerase alpha-primase complex, required for initiation of DNA replication during mitotic and premeiotic DNA synthesis; also functions in telomere capping and length regulation	alpha DNA polymerase:primase complex	-0.0174445	0.083279	0.932733	-0.04875	-0.291695	-0.132273	-0.136946	-0.102725	-0.240844	-0.187807	-0.202653	0.141938	0.0655245	0.932733
YBL036C	YBL036C	852244	2	Putative non-specific single-domain racemase based on structural similarity; binds pyridoxal 5'-phosphate; expression of GFP-fusion protein induced in response to the DNA-damaging agent MMS		0.0559783	-0.072112	1.07505	0.036601	0.116788	-0.04595	0.050515	0.0983655	0.14919	-0.049226	0.479868	-0.041149	-0.128197	1.07505
YBL037W	APL3	852243	2	Alpha-adaptin, large subunit of the clathrin associated protein complex (AP-2); involved in vesicle mediated transport	AP-2 adaptor complex	0.0640483	-0.139477	0.805584	0.375813		0.576219	0.153937	-0.244472	0.0754059	0.00875	-0.105391	-0.18827	0.0468955	0.805584
YBL038W	MRPL16	852242	2	Mitochondrial ribosomal protein of the large subunit	mitochondrial ribosomal large subunit	-0.0627085	0.248451	0.389989	0.111387	0.0533975	0.57488	0.253106	0.665795	-0.765498	0.928217	-0.405132	0.600042	-0.0044715	0.389989
YBL039C	URA7	852241	2	Major CTP synthase isozyme (see also URA8), catalyzes the ATP-dependent transfer of the amide nitrogen from glutamine to UTP, forming CTP, the final step in de novo biosynthesis of pyrimidines; involved in phospholipid biosynthesis		0.0297388	-0.063573	1.02324	-0.219031	0.104632	-0.057008	0.207356	0.153651	0.304632	-0.193915	-0.224009	-0.52855	-0.127977	1.02324
YBL041W	PRE7	852239	2	Beta 6 subunit of the 20S proteasome	20S proteasome	-0.0542101	-0.046907	0.707418	-0.076118	0.259952	0.085355	0.18842	0.121719	0.320013	-0.010595	0.043038	0.0741009	0.153919	0.707418
YBL042C	FUI1	852238	2	High affinity uridine permease, localizes to the plasma membrane; also mediates low but significant transport of the cytotoxic nucleoside analog 5-fluorouridine; not involved in uracil transport		0.254845	-0.809683	0.208217	-0.759983		-0.92144	-0.350022	-0.271839	-0.778053	-0.794138	-1.0534	-1.41844	-1.10607	0.208217
YBL045C	COR1	852235	2	Core subunit of the ubiquinol-cytochrome c reductase complex (bc1 complex), which is a component of the mitochondrial inner membrane electron transport chain	Cytochrome bc1 complex (Ubiquinol-cytochrome c reductase complex, complex III)	0.020381	0.497621	1.05175	-0.143173	-0.0879858	0.412948	0.0727079	0.695816	-0.871187	0.387226	-0.374653	0.687745	-0.182518	1.05175
YBL046W	PSY4	852234	2	Putative regulatory subunit of an evolutionarily conserved protein phosphatase; localization is cell-cycle dependent and regulated by Cdc28p phosphorylation; required for cisplatin resistance; homolog of mammalian R2	histone H2A phosphatase complex	0.0862773	0.033656	0.745873	0.02234	0.281515	-0.318065	-0.135358		0.0838629	0.009594	0.355441	0.162202	0.0523315	0.745873
YBL047C	EDE1	852233	2	Key endocytic protein involved in a network of interactions with other endocytic proteins, binds membranes in a ubiquitin-dependent manner, may also bind ubiquitinated membrane-associated proteins		-0.0591119	-0.051331	1.16235	0.186683	-0.0704958	0.065554	-0.224998	-0.251785	-0.172738	-0.040247	0.551236	0.006594	0.0719035	1.16235
YBL050W	SEC17	852230	2	Peripheral membrane protein required for vesicular transport between ER and Golgi, the 'priming' step in homotypic vacuole fusion, and autophagy; stimulates the ATPase activity of Sec18p; has similarity to mammalian alpha-SNAP		-0.0202651	-0.067104	1.08444	0.052152	-0.141474	-0.059028	-0.184908	-0.210238	0.120813	-0.269015	-0.049239	-0.155603	0.0620985	1.08444
YBL051C	PIN4	852229	2	Protein involved in G2/M phase progression and response to DNA damage, interacts with Rad53p; contains an RNA recognition motif, a nuclear localization signal, and several SQ/TQ cluster domains; hyperphosphorylated in response to DNA damage		0.0625053	-0.31893	1.00977	-0.135497	-0.116611	-0.314074	-0.190607	0.28083	0.205694	-0.026697	0.11765	-0.008094	0.216724	1.00977
YBL054W	TOD6	852226	2	PAC motif binding protein involved in rRNA and ribosome biogenesis; subunit of the RPD3L histone deacetylase complex; Myb-like HTH transcription factor, similar to Dot6p; hypophosphorylated by rapamycin treatment in a Sch9p-dependent manne		-0.129004	0.278321	0.817311	-0.448318	0.157868	0.087422	0.426715	0.451542	-0.0291505	0.291992	-0.255263	-0.126207	0.241298	0.817311
YBL055C	YBL055C	852225	2	3'-->5' exonuclease and endonuclease with a possible role in apoptosis; has similarity to mammalian and C. elegans apoptotic nucleases		-0.0077079	0.04997	1.05017	-0.008723	0.108605	0.048561	-0.109954	-0.329211	0.0903269	0.034118	0.012771	-0.033177	0.286517	1.05017
YBL056W	PTC3	852224	2	Type 2C protein phosphatase (PP2C); dephosphorylates Hog1p (see also Ptc2p) to limit maximal kinase activity induced by osmotic stress; dephosphorylates T169 phosphorylated Cdc28p (see also Ptc2p); role in DNA checkpoint inactivation		-0.0166461	0.112913	1.00686	0.073383	-0.143297	0.029719	-0.024981	-0.0010415	0.0049257	-0.111839	0.017451	0.004637	0.0842435	1.00686
YBL057C	PTH2	852223	2	One of two (see also PTH1) mitochondrially-localized peptidyl-tRNA hydrolases; negatively regulates the ubiquitin-proteasome pathway via interactions with ubiquitin-like ubiquitin-associated proteins; dispensable for cell growth		-0.110297	-0.010023	1.02954	0.127584	-0.0468005	0.01675	0.100181	-0.125182	0.0545109	-0.108772	-0.267278	-0.479494	0.0995985	1.02954
YBL058W	SHP1	852222	2	UBX (ubiquitin regulatory X) domain-containing protein that regulates Glc7p phosphatase activity and interacts with Cdc48p; interacts with ubiquitylated proteins in vivo and is required for degradation of a ubiquitylated model substrate		0.0977173	-0.06662	1.25987	-0.086785	-0.049451	-0.08535	0.034749	-0.0547725	-0.235747	0.070222	0.442357	0.002446	0.119663	1.25987
YBL059C-A	YBL059C-A	852220	2	Protein of the mitochondrial intermembrane space with a role in respiratory chain complex assembly or maintenance; contains twin Cx9C motifs that can form coiled coil-helix-coiled-coil helix fold		-0.0930552	0.044126	1.3343	0.306995	-0.030551	0.353697	-0.146945	1.05584	-1.09841	0.48321	0.224024	0.834721	-0.0404995	1.3343
YBL059W	YBL059W	852221	2	Putative protein of unknown function; the authentic, non-tagged protein is detected in highly purified mitochondria in high-throughput studies		0.0620603	0.250702	0.48412	0.147225	0.0538651	0.184236	0.099863	0.445473	-0.683296	0.241839	-0.248393	0.889917	-0.483504	0.48412
YBL060W	YEL1	852219	2	Guanine nucleotide exchange factor specific for Arf3p; localized to the bud neck and tip; required for localization of Arf3p to the bud neck and tip		0.138989	0.299754	0.900223				-0.128085		-0.286907	0.263109		0.126463	-0.0934535	0.900223
YBL061C	SKT5	852218	2	Activator of Chs3p (chitin synthase III), recruits Chs3p to the bud neck via interaction with Bni4p; has similarity to Shc1p, which activates Chs3p during sporulation		-0.0033017	-0.04241	1.07109	-0.036789	0.190207	-0.045699	0.20126	0.123587	0.535208	-0.300451	-0.323546	0.011459	0.0257535	1.07109
YBL063W	KIP1	852216	2	Kinesin-related motor protein required for mitotic spindle assembly, chromosome segregation, and 2 micron plasmid partitioning; functionally redundant with Cin8p for chromosomal but not plasmid functions		0.0106923		1.62639			-0.019486	0.350187			0.006629	0.083528		0.166993	1.62639
YBL064C	PRX1	852215	2	Mitochondrial peroxiredoxin (1-Cys Prx) with thioredoxin peroxidase activity, has a role in reduction of hydroperoxides; reactivation requires Trr2p and glutathione; induced during respiratory growth and oxidative stress; phosphorylated		-0.500621	0.659014	1.17343	-0.897146	0.808225	1.05049	0.45491	-0.232856	0.760841	1.36357	-0.490073	-0.26043	-0.52283	1.17343
YBL066C	SEF1	852214	2	Putative transcription factor, has homolog in Kluyveromyces lactis		-0.0233197	0.056321	1.24104	0.197124	-0.372911	0.178968			-0.976213			0.750062		1.24104
YBL067C	UBP13	852212	2	Putative ubiquitin carboxyl-terminal hydrolase, ubiquitin-specific protease that cleaves ubiquitin-protein fusions		-0.0512704	0.130331	1.09804	0.165977	0.136378	0.276175	-0.003136	0.25397	-0.447896	0.103397	-0.40709	0.265659	0.0735885	1.09804
YBL068W	PRS4	852211	2	5-phospho-ribosyl-1(alpha)-pyrophosphate synthetase, synthesizes PRPP, which is required for nucleotide, histidine, and tryptophan biosynthesis; one of five related enzymes, which are active as heteromultimeric complexes		0.1292	-0.043324	0.875774	-0.071802	0.0306393	-0.046199	0.011178	0.0021425	0.20361	-0.157673	-0.303168	-0.008415	-0.207048	0.875774
YBL068W-A	YBL068W-A		2	Dubious open reading frame unlikely to encode a protein; identified by fungal homology and RT-PCR		-0.0077826	-0.006924	0.977084	-0.022756	-0.370819	-0.117769	-0.187748	0.0719995	-0.12027	-0.158788	-0.185629	0.0487715	-0.0026355	0.977084
YBL069W	AST1	852209	2	Peripheral membrane protein that interacts with the plasma membrane ATPase Pma1p and has a role in its targeting to the plasma membrane, possibly by influencing its incorporation into lipid rafts		0.0748573	-0.127519	1.03343	-0.28343	-0.126785	0.002728	-0.218921	-0.108227	0.045291	-0.113741	-0.303561	-0.199516	-0.0991035	1.03343
YBL072C	RPS8A	852206	2	Protein component of the small (40S) ribosomal subunit; identical to Rps8Bp and has similarity to rat S8 ribosomal protein	cytoplasmic ribosomal small subunit	0.0104358	-0.081992	0.036362	-0.237416	-0.131214	-0.0915565	0.0545829	0.102381	-0.0634614	-0.150922	-0.228807	-0.416897	-0.104778	0.036362
YBL074C	AAR2	852205	2	Component of the U5 snRNP, required for splicing of U3 precursors; originally described as a splicing factor specifically required for splicing pre-mRNA of the MATa1 cistron	U5 snRNP complex	-0.159143	0.140313	1.12504	0.121131		0.203725	0.11285			0.153786		-0.352116		1.12504
YBL075C	SSA3	852203	2	ATPase involved in protein folding and the response to stress; plays a role in SRP-dependent cotranslational protein-membrane targeting and translocation; member of the heat shock protein 70 (HSP70) family; localized to the cytoplasm	HMC Complex	-1.42702	2.58624	-0.80237	-2.96893	1.9913	2.82574	3.51481	0.214871	1.46283	0.001484	1.61176	-0.842508	-2.3909	-0.80237
YBL076C	ILS1	852202	2	Cytoplasmic isoleucine-tRNA synthetase, target of the G1-specific inhibitor reveromycin A		0.112179	-0.113714	0.928153	-0.062816	-0.110321	-0.263515	-0.140708	-0.148413	0.300958	-0.371402	0.328841	-0.640203	-0.172818	0.928153
YBL078C	ATG8	852200	2	Component of autophagosomes and Cvt vesicles; undergoes conjugation to phosphatidylethanolamine (PE); Atg8p-PE is anchored to membranes, is involved in phagophore expansion, and may mediate membrane fusion during autophagosome formation		-0.251106	0.601896	1.14985	0.16811	0.667824	1.06425	0.414797	0.109273	0.839778	0.519459	0.085476	0.936964	-0.0185205	1.14985
YBL079W	NUP170	852199	2	Subunit of the nuclear pore complex (NPC), required for NPC localization of specific nucleoporins; involved in nuclear envelope permeability and chromosome segregation; has similar to Nup157p; essential role, with Nup157p, in NPC assembly	karyopherin docking subcomplex of the Nuclear Pore Complex (NPC)	0.0397003	-0.001527	0.891354	-0.034966	-0.0081599	-0.005242	0.247052	-0.0373915	-0.0664332	0.069586	-0.056298	-0.137001	-0.0572575	0.891354
YBL080C	PET112	852198	2	Subunit of the trimeric GatFAB AmidoTransferase(AdT) complex; involved in the formation of Q-tRNAQ; mutation is functionally complemented by the bacterial GatB ortholog		0.0428103	0.141165	-0.0743026	0.317226	0.116607	0.478732	-0.093629	0.321425	0.120934	0.496329	-0.096437	0.548446	-0.241161	-0.0743026
YBL084C	CDC27	852194	2	Subunit of the Anaphase-Promoting Complex/Cyclosome (APC/C), which is a ubiquitin-protein ligase required for degradation of anaphase inhibitors, including mitotic cyclins, during the metaphase/anaphase transition	anaphase-promoting complex	-0.523258		0.777819	-0.107795	-0.166566				-0.507818	-0.010519		-0.144603	0.443983	0.777819
YBL085W	BOI1	852193	2	Protein implicated in polar growth, functionally redundant with Boi2p; interacts with bud-emergence protein Bem1p; contains an SH3 (src homology 3) domain and a PH (pleckstrin homology) domain		-0.0308102	0.042041	1.00622	-0.125564	0.123412	0.001014	-0.11491	0.103357	-0.326141	0.18582	0.017912	-0.025286	0.102505	1.00622
YBL086C	YBL086C	852192	2	Protein of unknown function; green fluorescent protein (GFP)-fusion protein localizes to the cell periphery		0.328808	-0.008559	1.0524	-0.055452		-0.010764	-0.059331	0.142261	0.18699	0.220543	-0.13735	0.036657	0.170475	1.0524
YBL087C	RPL23A	852191	2	Protein component of the large (60S) ribosomal subunit, identical to Rpl23Bp and has similarity to E. coli L14 and rat L23 ribosomal proteins	cytoplasmic ribosomal large subunit	0.0310892	-0.063513	0.100689	-0.258249	-0.0520573	-0.0424585	-0.0036345	0.152921	0.0415415	-0.162196	-0.191809	-0.397506	-0.101013	0.100689
YBL088C	TEL1	852190	2	Protein kinase primarily involved in telomere length regulation; contributes to cell cycle checkpoint control in response to DNA damage; functionally redundant with Mec1p; homolog of human ataxia telangiectasia (ATM) gene				0.881583	-0.519986					0.238327					0.881583
YBL090W	MRP21	852188	2	Mitochondrial ribosomal protein of the small subunit; MRP21 exhibits genetic interactions with mutations in the COX2 and COX3 mRNA 5'-untranslated leader sequences	mitochondrial ribosomal small subunit	-0.0437672	0.219512	0.885704	0.039817	0.101775	0.572196	0.017321	0.912305	-0.471611	0.398129	0.090135	0.580536	-0.0901075	0.885704
YBL091C	MAP2	852187	2	Methionine aminopeptidase, catalyzes the cotranslational removal of N-terminal methionine from nascent polypeptides; function is partially redundant with that of Map1p		0.0571153	-0.176582	1.00989	-0.029941	-0.220969	-0.288073	-0.240768	-0.197749	-0.150257	-0.161775	0.109977	-0.124484	-0.0499775	1.00989
YBL092W	RPL32	852185	2	Protein component of the large (60S) ribosomal subunit, has similarity to rat L32 ribosomal protein; overexpression disrupts telomeric silencing	cytoplasmic ribosomal large subunit	-0.0182398	-0.030009	-0.0177395	-0.282381	0.0173001	-0.029524	0.049773	0.148632	-0.0173493	-0.114427	-0.24401	-0.344228	-0.184911	-0.0177395
YBL093C	ROX3	852184	2	Subunit of the RNA polymerase II mediator complex; associates with core polymerase subunits to form the RNA polymerase II holoenzyme	Kornberg's mediator (SRB) complex	0.0479253	0.002899	0.209579				-0.064036		0.584542	-0.151146	0.101709	-0.256549		0.209579
YBL095W	YBL095W	852181	2	Putative protein of unknown function; the authentic, non-tagged protein is detected in highly purified mitochondria in high-throughput studies		0.0530913	0.927996	0.882053	-0.466409		0.787019	0.335061	-0.0749465	-0.073678	1.03293	-2.28063	-0.076672	-0.63993	0.882053
YBL097W	BRN1	852180	2	Subunit of the condensin complex; required for chromosome condensation and for clustering of tRNA genes at the nucleolus; may influence multiple aspects of chromosome transmission	nuclear condensin complex	0.0277118	-0.056343	0.244146	-0.035076	-2.1e-06	0.213666		-0.75539	0.278135	0.13333	0.207863	-0.118733	0.0285445	0.244146
YBL098W	BNA4	852179	2	Kynurenine 3-mono oxygenase, required for the de novo biosynthesis of NAD from tryptophan via kynurenine; expression regulated by Hst1p; putative therapeutic target for Huntington disease		0.103294	-0.220292	0.497977	0.05757	-0.623627	-0.07121	-0.366062	0.685816	0.594895	-0.378558	-0.24947	-0.383909	0.31351	0.497977
YBL099W	ATP1	852177	2	Alpha subunit of the F1 sector of mitochondrial F1F0 ATP synthase, which is a large, evolutionarily conserved enzyme complex required for ATP synthesis; phosphorylated	F0/F1 ATP synthase (complex V)	-0.0576286	0.303137	0.432611	-0.383086	-0.0819068	0.293137	0.162621	0.565271	-0.725409	0.459074	-0.265244	0.581717	-0.120271	0.432611
YBL101C	ECM21	852173	2	Protein involved in regulating the endocytosis of plasma membrane proteins; identified as a substrate for ubiquitination by Rsp5p and deubiquitination by Ubp2p; promoter contains several Gcn4p binding elements		0.0058445	0.133023	1.09781	-0.064971	0.258856	0.205803	0.119271	0.0746775	0.0820529	0.069501	0.043217	0.272648	-0.0160365	1.09781
YBL103C	RTG3	852171	2	Basic helix-loop-helix-leucine zipper (bHLH/Zip) transcription factor that forms a complex with another bHLH/Zip protein, Rtg1p, to activate the retrograde (RTG) and TOR pathways	Rtg1p/Rtg3p complex	0.322153	-0.090798	0.864144	-0.129129	-0.293944	-0.021275	-0.111711	-0.0559795	0.0313075	-0.038005	0.329206	-0.086973	-0.152063	0.864144
YBL104C	YBL104C	852170	2	Putative protein of unknown function, promoter contains multiple GCN4 binding sites		-0.132562	-0.097166	1.24686	0.251629	-0.313962	-0.088567	-0.096974	-0.184678	-0.193961	-0.062616	0.212443	-0.026182	0.0062325	1.24686
YBL105C	PKC1	852169	2	Protein serine/threonine kinase essential for cell wall remodeling during growth; localized to sites of polarized growth and the mother-daughter bud neck; homolog of the alpha, beta, and gamma isoforms of mammalian protein kinase C (PKC)		-0.0215523	0.144772	1.10414	-0.006478	-0.05058	0.035465	0.007915	-0.245045	0.0358635	0.07331	-0.169847	-0.070439	-0.0132655	1.10414
YBL107C	YBL107C	852167	2	Putative protein of unknown function; green fluorescent protein (GFP)-fusion protein localizes to the cytoplasm; YBL107C is not an essential gene		0.0058078	0.082246	1.42165	-0.238375	0.20023	0.357531	0.17855	0.581978	-0.0673024	0.251278	-0.264359	0.065138	-0.181781	1.42165
YBL111C	YBL111C	852161	2	Helicase-like protein encoded within the telomeric Y' element		0.0205902	0.040889	-0.017302	-1.06323	-0.120806	-0.0398675	-0.48151	-0.0533755	-0.131256	-0.298806	0.18788	-0.0279295	0.381915	-0.017302
YBL112C	YBL112C	852160	2	Putative protein of unknown function; YBL112C is contained within TEL02L													0.237281
YBL113C	YBL113C	852159	2	Helicase-like protein encoded within the telomeric Y' element		-0.0207065	0.106438	-0.084856	-0.79391	0.0306483	-0.0350075	-0.0275715	0.226367	0.0616106	-0.351302	0.787674	0.192781	0.638447	-0.084856
YBR001C	NTH2	852286	2	Putative neutral trehalase, required for thermotolerance and may mediate resistance to other cellular stresses		-0.242016		0.086076	-0.208781	0.745834	0.507923	0.278123	-0.157935	0.616211	0.541961	-0.270595	0.46982	-0.210142	0.086076
YBR002C	RER2	852287	2	Cis-prenyltransferase involved in dolichol synthesis; participates in endoplasmic reticulum (ER) protein sorting		0.0737323	-0.066193	0.742865	-0.121046	0.365038			-0.125809	0.254976			-0.276953	-0.202371	0.742865
YBR003W	COQ1	852288	2	Hexaprenyl pyrophosphate synthetase, catalyzes the first step in ubiquinone (coenzyme Q) biosynthesis		-0.124062	0.08865	1.21887	0.007227	-0.0438077	0.312771	-0.014116	0.755246	-0.444967	0.047103	-0.219369	0.649355	-0.171898	1.21887
YBR006W	UGA2	852291	2	Succinate semialdehyde dehydrogenase involved in the utilization of gamma-aminobutyrate (GABA) as a nitrogen source; part of the 4-aminobutyrate and glutamate degradation pathways; localized to the cytoplasm		-0.438243	0.77588	1.05647	-0.985464	0.57508	0.921079	0.456958	0.161878	0.0873909	0.82026	-0.084498	0.264284	-0.258341	1.05647
YBR007C	DSF2	852292	2	Deletion suppressor of mpt5 mutation		-0.0408585	0.170328	1.43055	-0.020266	-0.103421	0.188928	-0.034781	-0.311492	-0.186568	-0.133468	-0.115871	0.183256	0.578639	1.43055
YBR009C	HHF1	852294	2	Histone H4, core histone protein required for chromatin assembly and chromosome function; one of two identical histone proteins (see also HHF2); contributes to telomeric silencing; N-terminal domain involved in maintaining genomic integrity	Nucleosomal protein complex|RNA polymerase I upstream activating factor complex	-0.0365764	0.225132	0.073901	0.020795	-0.532447	0.0779975	0.0207175	-0.407684	-0.629285	0.350661	-0.266039	-0.33279	0.178917	0.073901
YBR011C	IPP1	852296	2	Cytoplasmic inorganic pyrophosphatase (PPase), homodimer that catalyzes the rapid exchange of oxygens from Pi with water, highly expressed and essential for viability, active-site residues show identity to those from E. coli PPase		0.153174	-0.275029	0.919983	-0.381826	-0.274131	-0.300237	-0.345496	-0.158708	-0.0369063	-0.247131	0.020937	-0.052174	-0.0542755	0.919983
YBR014C	GRX7	852302	2	Cis-golgi localized monothiol glutaredoxin; more similar in activity to dithiol than other monothiol glutaredoxins; involved in the oxidative stress response; does not bind metal ions; functional overlap with GRX6		0.0060238	-0.242935	0.509695	-0.46428	-0.0074605	0.010323	-0.286252	-0.279057	-0.0096849	-0.296483	-0.205904	-0.419272	0.0772075	0.509695
YBR015C	MNN2	852303	2	Alpha-1,2-mannosyltransferase, responsible for addition of the first alpha-1,2-linked mannose to form the branches on the mannan backbone of oligosaccharides, localizes to an early Golgi compartment		0.0043916	-0.011736	0.882493	-0.181727	-0.0955018	0.050672	-0.052661	0.240636	-0.0968463	0.034059	-0.244839	0.0959143	-0.103671	0.882493
YBR017C	KAP104	852305	2	Transportin or cytosolic karyopherin beta 2; functions in the rg-nuclear localization signal-mediated nuclear import/reimport of mRNA-binding proteins Nab2p and Hrp1p; regulates asymmetric protein synthesis in daughter cells during mitosis		-0.0789277	-0.123591	0.864114	0.083148	-0.0180182	-0.127468	-0.059136	-0.290782	0.243039	-0.08107	0.14799	-0.180709	-0.257744	0.864114
YBR022W	POA1	852310	2	Phosphatase that is highly specific for ADP-ribose 1''-phosphate, a tRNA splicing metabolite; may have a role in regulation of tRNA splicing		0.0658403	0.081027	1.23422	0.316947	-0.116536	-0.215314	-0.261449	0.155438	-0.0035418	0.039385	-0.118629	0.24268	0.12999	1.23422
YBR023C	CHS3	852311	2	Chitin synthase III, catalyzes the transfer of N-acetylglucosamine (GlcNAc) to chitin; required for synthesis of the majority of cell wall chitin, the chitin ring during bud emergence, and spore wall chitosan		-0.114562	0.041766	1.18645	-0.18713	0.179574	0.070474	0.325815	0.575187	0.683171	-0.250726	-0.29073	0.12899	0.235884	1.18645
YBR024W	SCO2	852312	2	Protein anchored to the mitochondrial inner membrane, similar to Sco1p and may have a redundant function with Sco1p in delivery of copper to cytochrome c oxidase; interacts with Cox2p		0.148274	0.169363	1.28621	-0.08468	0.496842	0.541189		0.179092	-0.195257	0.412288	-1.12562	0.602045	0.339068	1.28621
YBR025C	OLA1	852313	2	P-loop ATPase with similarity to human OLA1 and bacterial YchF; identified as specifically interacting with the proteasome; protein levels are induced by hydrogen peroxide		0.135131	-0.154816	0.932804	-0.200201	-0.143314	-0.206946	-0.119555	0.0444395	-0.048253	-0.195149	-0.302262	-0.230882	-0.0549335	0.932804
YBR026C	ETR1	852314	2	2-enoyl thioester reductase, member of the medium chain dehydrogenase/reductase family; localized to in mitochondria, where it has a probable role in fatty acid synthesis		-0.174729	0.140335	0.83177	-0.403695	0.220315	0.36486	0.149779	-0.105564	0.136403	0.297669	-0.006537	0.429114	-0.19875	0.83177
YBR028C	YBR028C	852316	2	Putative protein kinase, possible substrate of cAMP-dependent protein kinase (PKA)		0.126998	0.202207	0.659313	0.040329	-0.412573	0.330892	-0.233559	-0.0081365	-0.483431	-0.515731	0.066354	-0.462976	-0.211967	0.659313
YBR029C	CDS1	852317	2	Phosphatidate cytidylyltransferase (CDP-diglyceride synthetase); an enzyme that catalyzes that conversion of CTP + phosphate into diphosphate + CDP-diaclglyerol, a critical step in the synthesis of all major yeast phospholipids		-0.0671074	-0.063877	1.06765	0.117462	-0.0688098	0.130672	-0.043434	0.211519	0.111249	0.240195	-0.119312	-0.166435	0.0659285	1.06765
YBR030W	RKM3	852318	2	Ribosomal lysine methyltransferase specific for monomethylation of Rpl42ap and Rpl42bp (lysine 40); nuclear SET domain containing protein		0.121088	-1.26704	0.908784	0.198717	0.0625405	-0.711102	0.160968		0.255224	-0.034521		-0.370276	-0.118859	0.908784
YBR031W	RPL4A	852319	2	N-terminally acetylated protein component of the large (60S) ribosomal subunit, nearly identical to Rpl4Bp and has similarity to E. coli L4 and rat L4 ribosomal proteins	cytoplasmic ribosomal large subunit	-0.0119544	-0.047462	0.319744	-0.405913	-0.0942198	-0.113645	-0.056718	0.126393	-0.0473536	-0.203556	-0.184438	-0.266533	-0.146874	0.319744
YBR034C	HMT1	852322	2	Nuclear SAM-dependent mono- and asymmetric arginine dimethylating methyltransferase that modifies hnRNPs, including Npl3p and Hrp1p, affecting their activity and nuclear export; methylates U1 snRNP protein Snp1p and ribosomal protein Rps2p		0.0617273	-0.073773	1.19235	-0.133134	0.0254089	0.111362	-0.059357	0.420847	0.235653	-0.060179	-0.193437	0.019237	0.0371975	1.19235
YBR035C	PDX3	852323	2	Pyridoxine (pyridoxamine) phosphate oxidase, has homologs in E. coli and Myxococcus xanthus; transcription is under the general control of nitrogen metabolism		0.206644	-0.043778	1.12503	0.190582	-0.363775	-0.143096	-0.470497	0.228139	0.236517	-0.24542	0.415261	-0.251077	-0.210836	1.12503
YBR037C	SCO1	852325	2	Copper-binding protein of the mitochondrial inner membrane, required for cytochrome c oxidase activity and respiration; may function to deliver copper to cytochrome c oxidase; has similarity to thioredoxins		-0.085329	0.205577	1.29705	0.170426	-0.051485	0.591917	-0.233063		-0.873662	0.52859	0.012612	0.393781	0.250794	1.29705
YBR038W	CHS2	852326	2	Chitin synthase II; catalyzes transfer of N-acetylglucosamine (GlcNAc) to chitin upon activation of zymogenic form; required for chitin synthesis in the primary septum during cytokinesis; localization regulated by Cdk1p during mitosis		0.138256	0.041569	1.33832	-0.048742		0.144447	0.404294	0.0284935	0.511199	0.040894	0.322884	-0.136349	0.222223	1.33832
YBR039W	ATP3	852327	2	Gamma subunit of the F1 sector of mitochondrial F1F0 ATP synthase, which is a large, evolutionarily conserved enzyme complex required for ATP synthesis	F0/F1 ATP synthase (complex V)	-0.0184209	0.33559	0.187173	-0.286893	-0.0595548	0.308444	0.229388	0.584276	-0.773743	0.436885	-0.328234	0.650484	-0.0859995	0.187173
YBR041W	FAT1	852329	2	Very long chain fatty acyl-CoA synthetase and long chain fatty acid transporter; activates imported fatty acids with a preference for very long lengths (C20-C26); has a separate function in the transport of long chain fatty acids	Fatty Acid Import Complex	-0.0148663	0.055891	0.955184	0.031571	0.0350503	0.173538	-0.743857	0.0945805	0.442655	0.844645	0.32832	0.183518	0.28106	0.955184
YBR042C	CST26	852330	2	Protein required for incorporation of stearic acid into phosphatidylinositol; affects chromosome stability when overexpressed		-0.0846006	-0.386909	0.946523	-0.01217	0.143015	-0.171773	0.181206	-0.233227	-0.0941343	0.137194	-0.051872	-0.098202	0.0825265	0.946523
YBR044C	TCM62	852332	2	Protein involved in the assembly of the mitochondrial succinate dehydrogenase complex; putative chaperone		-0.156825	-0.140427	0.868093	-0.242359	-0.0591238		0.451875	0.476712	-0.607574	0.041799		0.459955		0.868093
YBR046C	ZTA1	852335	2	NADPH-dependent quinone reductase, GFP-tagged protein localizes to the cytoplasm and nucleus; has similarity to E. coli quinone oxidoreductase and to human zeta-crystallin		0.262658	0.104938	0.814345	0.503689	-0.309029	0.025145	-0.194293	0.0964695	0.555575	-0.054341	0.21809	0.0843689	-0.510816	0.814345
YBR048W	RPS11B	852337	2	Protein component of the small (40S) ribosomal subunit; identical to Rps11Ap and has similarity to E. coli S17 and rat S11 ribosomal proteins	cytoplasmic ribosomal small subunit	0.0071041	-0.02601	0.014305	-0.282086	-0.0030822	-0.0642355	0.080507	0.128686	-0.0169574	-0.123529	-0.265844	-0.445942	-0.150212	0.014305
YBR049C	REB1	852338	2	RNA polymerase I enhancer binding protein; DNA binding protein which binds to genes transcribed by both RNA polymerase I and RNA polymerase II; required for termination of RNA polymerase I transcription		0.0205942	0.07784	0.454734	-0.151452	-0.265722	-0.109155	-0.044911	-0.177926	-0.414127	0.173614	0.066074	-0.149616	0.272129	0.454734
YBR052C	RFS1	852341	2	Protein of unknown function; member of a flavodoxin-like fold protein family that includes Pst2p and Ycp4p; green fluorescent protein (GFP)-fusion protein localizes to the cytoplasm in a punctate pattern		-0.051559	0.191523	0.974653	-0.365267	0.0412292	0.20208	-0.287544	-0.130826	-0.39359	0.314145	0.198336	0.278457	-0.0877045	0.974653
YBR053C	YBR053C	852342	2	Putative protein of unknown function; induced by cell wall perturbation		-0.231494	0.173601	1.09161	-0.605487	0.0997791	0.451112	-0.045716	-0.340949	0.646025	0.423505	-0.073716	0.384124	-0.0871995	1.09161
YBR054W	YRO2	852343	2	Putative protein of unknown function; the authentic, non-tagged protein is detected in a phosphorylated state in highly purified mitochondria in high-throughput studies; transcriptionally regulated by Haa1p		0.170284	-0.799073	0.405349	-1.20189	-1.01997	-0.0178345	-0.19569		-0.494106	0.314001	-1.91303	-0.485371	0.464581	0.405349
YBR055C	PRP6	852344	2	Splicing factor, component of the U4/U6-U5 snRNP complex	U4/U6 x U5 tri-snRNP complex	-0.0617888	-0.024921	0.834912	-0.136665	-0.0756908	-0.28349	-0.161474	-0.17248	-0.112067	-0.087106	0.312675	-0.003437	-0.737107	0.834912
YBR056W	YBR056W	852346	2	Putative cytoplasmic protein of unknown function		-0.264103	0.244025	0.988594	-0.329263	0.363867	0.398617	0.183768	-0.361274	0.391934	0.351265	0.182736	0.309735	-0.194049	0.988594
YBR057C	MUM2	852348	2	Cytoplasmic protein essential for meiotic DNA replication and sporulation; interacts with Orc2p, which is a component of the origin recognition complex		-0.0304081	-0.034201	0.747116	-0.09734	-0.245759	0.02324	-0.165807	0.44052	-0.587114	-0.210653	0.511591	0.0988705	0.242251	0.747116
YBR058C	UBP14	852349	2	Ubiquitin-specific protease that specifically disassembles unanchored ubiquitin chains; involved in fructose-1,6-bisphosphatase (Fbp1p) degradation; similar to human isopeptidase T		0.236991	-0.268867	1.18289	0.132475	-0.260844	-0.359397	-0.169542	0.0138265	-0.192418	-0.012193	0.326894	-0.058067	-0.0440995	1.18289
YBR058C-A	TSC3	852350	2	Protein that stimulates the activity of serine palmitoyltransferase (Lcb1p, Lcb2p) several-fold; involved in sphingolipid biosynthesis		-0.0272739	0.178687	0.29366	0.174487	0.0795879	-0.387592	0.115976	-0.0347545	-0.0076488	0.133105	-0.151473	0.004874	0.0850995	0.29366
YBR059C	AKL1	852351	2	Ser-Thr protein kinase, member (with Ark1p and Prk1p) of the Ark kinase family; involved in endocytosis and actin cytoskeleton organization		-0.113957	-0.142234	1.13871	0.126838	-0.0350714	-0.077564	-0.195657	-0.259448	-0.203565	-0.012938	0.170881	-0.044292	-0.0758065	1.13871
YBR060C	ORC2	852352	2	Subunit of the origin recognition complex, which directs DNA replication by binding to replication origins and is also involved in transcriptional silencing; interacts with Spp1p and with trimethylated histone H3; phosphorylated by Cdc28p	Origin recognition complex	0.254795	0.004411	0.42121	0.373381	-0.0338871	-0.108327	-0.078736		-0.0413581	0.106154	-0.018742	-0.155457	0.0065225	0.42121
YBR061C	TRM7	852353	2	2'-O-ribose methyltransferase, methylates the 2'-O-ribose of nucleotides at positions 32 and 34 of the tRNA anticodon loop		0.0760763	0.013787	0.750976	0.149553	-0.183983	-0.189589	-0.218755	0.0956435	-0.228218	0.048229	-0.265371	-0.214944	0.11177	0.750976
YBR065C	ECM2	852357	2	Pre-mRNA splicing factor, facilitates the cooperative formation of U2/U6 helix II in association with stem II in the spliceosome, function may be regulated by Slu7p		0.0827953	0.072875	0.984934	-0.074565	0.0348571	-0.003415	0.0543134	0.185408	0.447937	-0.18681	0.120758	-0.252489	0.0813305	0.984934
YBR068C	BAP2	852360	2	High-affinity leucine permease, functions as a branched-chain amino acid permease involved in the uptake of leucine, isoleucine and valine; contains 12 predicted transmembrane domains		-0.619553		0.55521	0.564059	0.179509	0.471259			0.644926	0.318968		0.146451	0.267018	0.55521
YBR069C	TAT1	852361	2	Amino acid transport protein for valine, leucine, isoleucine, and tyrosine, low-affinity tryptophan and histidine transporter; overexpression confers FK506 and FTY720 resistance		-0.197545	0.160712	1.06764	-0.186662	0.0962372	0.106701	0.750307	-0.0222365	-0.910735	0.689033	0.128179	0.00655	0.169587	1.06764
YBR071W	YBR071W	852363	2	Putative protein of unknown function; (GFP)-fusion and epitope-tagged proteins localize to the cytoplasm; mRNA expression may be regulated by the cell cycle and/or cell wall stress		-0.0849243	-0.164467	0.875874	-0.704426	0.00173	0.232714	-0.011264	0.386382	0.459023	-0.046071	-0.2981	0.435314	-0.0081815	0.875874
YBR072W	HSP26	852364	2	Small heat shock protein (sHSP) with chaperone activity; forms hollow, sphere-shaped oligomers that suppress unfolded proteins aggregation; oligomer activation requires heat-induced conformational change; also has mRNA binding activity		-1.36492	2.98428	-0.538899	-1.34332	1.82655	2.98417	2.79571	-3.02131	1.13763	2.4741	-3.02599	-0.223162	-3.24568	-0.538899
YBR073W	RDH54	852365	2	DNA-dependent ATPase, stimulates strand exchange by modifying the topology of double-stranded DNA; involved in recombinational repair of DNA double-strand breaks during mitosis and meiosis; proposed to be involved in crossover interference		0.0415143	-0.208167	1.12545	-0.399297	0.0514828	-0.038141	0.180284	0.144995	0.114645	-0.309674	-0.12236	-0.037479	-0.0870865	1.12545
YBR074W	YBR074W	852366	2	Putative metalloprotease		0.0632443	-0.152313	0.83528	-0.348877	-0.194773	-0.263608	0.212735	-0.168656	0.0560739	-0.187989	0.054337	-0.339709	-0.0139635	0.83528
YBR077C	SLM4	852369	2	Component of the EGO complex, which is involved in the regulation of microautophagy, and of the GSE complex, which is required for proper sorting of amino acid permease Gap1p; gene exhibits synthetic genetic interaction with MSS4	EGO complex|GSE Complex	-0.0500724	-0.046077	0.908893	0.024281	0.0049875	-0.088073	-0.142744	0.0933585	-0.121524	-0.200927	0.045372	0.277097	0.171164	0.908893
YBR078W	ECM33	852370	2	GPI-anchored protein of unknown function, has a possible role in apical bud growth; GPI-anchoring on the plasma membrane crucial to function; phosphorylated in mitochondria; similar to Sps2p and Pst1p		-0.0719364	-0.092516	1.12456	0.313956	0.0567032	0.323669	0.02548	0.144711	0.301358	0.121635	0.164832	0.240143	0.184218	1.12456
YBR079C	RPG1	852371	2	eIF3a subunit of the core complex of translation initiation factor 3 (eIF3), essential for translation; part of a Prt1p-Rpg1p-Nip1p subcomplex that stimulates binding of mRNA and tRNA(i)Met to ribosomes; involved in translation reinitiation	eIF3	0.0216929	-0.065486	0.344634	-0.223696	-0.0005016	-0.064744	-0.045847	0.150398	0.121036	0.297228	-0.1351	-0.436033	-0.0760555	0.344634
YBR080C	SEC18	852372	2	ATPase required for vesicular transport between ER and Golgi, the 'priming' step in homotypic vacuole fusion, autophagy, and protein secretion; releases Sec17p from SNAP complexes; has similarity to mammalian NSF		-0.0188371	-0.216754	0.984103	0.097204	-0.0238251	-0.015737	-0.034138	-0.143666	0.0473349	-0.093037	0.15052	-0.085328	-0.0091155	0.984103
YBR081C	SPT7	852373	2	Subunit of the SAGA transcriptional regulatory complex, involved in proper assembly of the complex; also present as a C-terminally truncated form in the SLIK/SALSA transcriptional regulatory complex	SAGA complex|SLIK (SAGA-like) complex	0.0477223	0.029228	0.928174	0.121368	-0.0689718	-0.058206	0.0992617	-0.0368895	-0.0587404	-0.071748	0.270438	-0.034507	-0.0712425	0.928174
YBR082C	UBC4	852376	2	Ubiquitin-conjugating enzyme (E2), mediates degradation of abnormal or excess proteins, including calmodulin and histone H3; interacts with many SCF ubiquitin protein ligases; component of the cellular stress response		0.0566613	-0.150296	0.974243	-0.172665	0.046274	0.359582	-0.011538	0.284004	0.286961	0.120177	-0.137366	-0.067272	0.0391515	0.974243
YBR083W	TEC1	852377	2	Transcription factor required for full Ty1 expression, Ty1-mediated gene activation, and haploid invasive and diploid pseudohyphal growth; TEA/ATTS DNA-binding domain family member		0.124381	0.024696	-0.021993	0.135481	0.0318349	0.558674		-0.0228315	0.172031	-0.540327			-1.2033	-0.021993
YBR084C-A	RPL19A	852379	2	Protein component of the large (60S) ribosomal subunit, nearly identical to Rpl19Bp and has similarity to rat L19 ribosomal protein; rpl19a and rpl19b single null mutations result in slow growth, while the double null mutation is lethal	cytoplasmic ribosomal large subunit	0.0382981	-0.007193	-0.013079	-0.282523	-0.0709607	-0.0607875	0.0154875	0.189894	-0.0693487	-0.16398	-0.256652	-0.432947	-0.156025	-0.013079
YBR084W	MIS1	852378	2	Mitochondrial C1-tetrahydrofolate synthase, involved in interconversion between different oxidation states of tetrahydrofolate (THF); provides activities of formyl-THF synthetase, methenyl-THF cyclohydrolase, and methylene-THF dehydrogenase		0.0454263	-0.041311	1.01286	-0.102365	-0.0258133	0.084844	0.0672417	0.183478	-0.327671	0.146028	-0.352067	-0.102665	0.173506	1.01286
YBR085C-A	YBR085C-A	852381	2	Putative protein of unknown function; green fluorescent protein (GFP)-fusion protein localizes to the cytoplasm and to the nucleus		-0.0704915	0.415608	0.845683	-0.298348	1.08165	1.26197	0.238361	0.144979	1.15324	0.947245	0.783488	1.13618	0.527097	0.845683
YBR085W	AAC3	852380	2	Mitochondrial inner membrane ADP/ATP translocator, exchanges cytosolic ADP for mitochondrially synthesized ATP; expressed under anaerobic conditions; similar to Pet9p and Aac1p; has roles in maintenance of viability and in respiration		0.0331102	0.429327	1.06806	-0.233477	0.0397682	0.597449	-0.487891	0.746008	0.998758	0.521343	-0.428502	0.699639	-0.144215	1.06806
YBR086C	IST2	852382	2	Plasma membrane protein that may be involved in osmotolerance, localizes to the mother cell in small-budded cells and to the bud in medium- and large-budded cells; mRNA is transported to the bud tip by an actomyosin-driven process		-0.0918276	0.260184	0.976073	-0.222695	-0.0773208	0.061052	0.0947434	-0.206044	0.26679	0.278224	-0.235043	0.196431	0.0154635	0.976073
YBR087W	RFC5	852383	2	Subunit of heteropentameric Replication factor C (RF-C), which is a DNA binding protein and ATPase that acts as a clamp loader of the proliferating cell nuclear antigen (PCNA) processivity factor for DNA polymerases delta and epsilon	DNA replication factor C complex (Rad24p)|DNA replication factor C complex (Elg1p)|DNA replication factor C complex (Rcf1p)|DNA replication factor C complex (Ctf18p/Ctf8p/dcc1p)	-0.0609482	-0.066209	0.449496	-0.02605	0.0063975	-0.100823	0.18291	0.10191	-0.0685905	-0.029973	-0.098108	0.030541	0.0885105	0.449496
YBR088C	POL30	852385	2	Proliferating cell nuclear antigen (PCNA), functions as the sliding clamp for DNA polymerase delta; may function as a docking site for other proteins required for mitotic and meiotic chromosomal DNA replication and for DNA repair		-0.0422379	-0.051356	1.09042	-0.396108	-0.341498	-0.132557	-0.239851	0.0985035	0.239112	-0.233991	-0.084952	0.148043	-0.111913	1.09042
YBR089C-A	NHP6B	852386	2	High-mobility group (HMG) protein that binds to and remodels nucleosomes; involved in recruiting FACT and other chromatin remodelling complexes to the chromosomes; functionally redundant with Nhp6Ap; homologous to mammalian HMGB1 and HMGB2		-3.32016
YBR091C	TIM12	852388	2	Essential protein of the inner mitochondrial membrane, peripherally localized; component of the TIM22 complex, which is a twin-pore translocase that mediates insertion of numerous multispanning inner membrane proteins	mitochondrial inner membrane protein insertion complex	0.124234		1.26266		-0.455286	0.246509	-0.211603	0.974436	-0.128771	0.33381	0.011434	0.580622	0.182215	1.26266
YBR092C	PHO3	852389	2	Constitutively expressed acid phosphatase similar to Pho5p; brought to the cell surface by transport vesicles; hydrolyzes thiamin phosphates in the periplasmic space, increasing cellular thiamin uptake; expression is repressed by thiamin		0.19657	-0.306529	0.944304	-1.07842	-0.130808	-0.553503	0.211906	0.635665	-0.721719	-0.375703	-0.003799	0.188079	-0.169455	0.944304
YBR093C	PHO5	852390	2	Repressible acid phosphatase (1 of 3) that also mediates extracellular nucleotide-derived phosphate hydrolysis; secretory pathway derived cell surface glycoprotein; induced by phosphate starvation and coordinately regulated by PHO4 and PHO2		0.033656	0.689439	1.78519	-1.33225	0.493271	-0.4513	-1.04363	0.233908	0.824269	-2.17021	-3.18431	-0.23882	-3.79348	1.78519
YBR094W	PBY1	852391	2	Putative tubulin tyrosine ligase associated with P-bodies		-0.0670906	-0.115827	1.02654	-0.216781	0.190666	0.214539	0.197496	0.0869945	0.0541529	0.139311	-0.00914	0.173465	-0.0425195	1.02654
YBR095C	RXT2	852392	2	Subunit of the histone deacetylase Rpd3L complex; possibly involved in cell fusion and invasive growth	Rpd3L complex	0.0130979	-0.187601	0.560006	-0.038743	0.0268865	-0.006501	0.01836	-0.222104	0.0552619	0.0988718	0.312187	0.126148	0.178719	0.560006
YBR096W	YBR096W	852393	2	Putative protein of unknown function; green fluorescent protein (GFP)-fusion protein localizes to the ER		-0.110861	-0.069946	1.11524	0.533893	0.899551	0.315799	0.134771	-0.0643715	-0.137863	0.123192	0.235269	0.116793	0.115751	1.11524
YBR097W	VPS15	852394	2	Myristoylated serine/threonine protein kinase involved in vacuolar protein sorting; functions as a membrane-associated complex with Vps34p; active form recruits Vps34p to the Golgi membrane; interacts with the GDP-bound form of Gpa1p	phosphatidylinositol (PtdIns) 3-kinase complex (functions in autophagy)|phosphatidylinositol (PtdIns) 3-kinase complex (functions in CPY sorting)	-0.0700972	0.191112	1.44365	-0.181261	0.174323	0.144643	0.002992	-0.280866	0.127683	0.146868		0.106428	0.136817	1.44365
YBR098W	MMS4	852395	2	Subunit of the structure-specific Mms4p-Mus81p endonuclease that cleaves branched DNA; involved in recombination, DNA repair, and joint molecule formation/resolution during meiotic recombination	Holliday junction resolvase complex	0.11229	-0.110517	0.654869						-0.498043					0.654869
YBR101C	FES1	852397	2	Hsp70 (Ssa1p) nucleotide exchange factor, cytosolic homolog of Sil1p, which is the nucleotide exchange factor for BiP (Kar2p) in the endoplasmic reticulum		-0.0131191	-0.200658	1.12274	0.319548	0.309548	0.18335	0.249023	0.0332535	0.287837	0.0958749	0.224406	0.294642	0.0524835	1.12274
YBR102C	EXO84	852398	2	Essential protein with dual roles in spliceosome assembly and exocytosis; the exocyst complex (Sec3p, Sec5p, Sec6p, Sec8p, Sec10p, Sec15p, Exo70p, and Exo84p) mediates polarized targeting of secretory vesicles to active sites of exocytosis	Exocyst complex	0.109046	0.077952	1.00456	0.193852	-0.246049	-0.008018	-0.081441	-0.13837	-0.257395	0.012419	0.075676	0.033352	0.0610835	1.00456
YBR103W	SIF2	852399	2	WD40 repeat-containing subunit of the Set3C histone deacetylase complex, which represses early/middle sporulation genes; antagonizes telomeric silencing; binds specifically to the Sir4p N-terminus	Set3p complex	-0.107606	0.25707	1.12908	0.15583	-0.0373369	-0.014791	0.169576	-0.225124	-0.034371	-0.133107	-0.18199	0.111004	-0.0318195	1.12908
YBR104W	YMC2	852401	2	Mitochondrial protein, putative inner membrane transporter with a role in oleate metabolism and glutamate biosynthesis; member of the mitochondrial carrier (MCF) family; has similarity with Ymc1p		0.202148	-0.098258	0.82007	0.593697	0.357085	-0.392241	-0.116429	0.336053	0.19842	0.154796	-0.404258	-0.763328	-0.164544	0.82007
YBR106W	PHO88	852403	2	Probable membrane protein, involved in phosphate transport; pho88 pho86 double null mutant exhibits enhanced synthesis of repressible acid phosphatase at high inorganic phosphate concentrations		-0.052796	-0.179437	0.908383	-0.248982	0.306762	0.138318	0.165698	0.106065	0.206462	-0.120371	-0.100783	-0.37754	0.0526245	0.908383
YBR108W	AIM3	852405	2	Protein interacting with Rvs167p; null mutant is viable and displays elevated frequency of mitochondrial genome loss		-0.115594	0.211045	1.19959	-0.039473	0.244168	0.291199	-0.105998	0.0719705	-0.0059113	-0.131065	0.10873	0.434086	0.483835	1.19959
YBR109C	CMD1	852406	2	Calmodulin; Ca++ binding protein that regulates Ca++ independent processes (mitosis, bud growth, actin organization, endocytosis, etc.) and Ca++ dependent processes (stress-activated pathways), targets include Nuf1p, Myo2p and calcineurin	SPB components	-0.0430799	0.015734	0.75	-0.064398	0.0715512	-0.003925	-0.144627	-0.0087645	0.25316	-0.062927	0.050728	0.309128	-0.0937105	0.75
YBR110W	ALG1	852407	2	Mannosyltransferase, involved in asparagine-linked glycosylation in the endoplasmic reticulum (ER); essential for viability, mutation is functionally complemented by human ortholog		-0.171846	-0.027547	0.764386	0.015287	0.0407241	0.081012	0.125859	-0.111359	0.1218	0.058021	0.076547	0.179255	0.20277	0.764386
YBR111C	YSA1	852408	2	Nudix hydrolase family member with ADP-ribose pyrophosphatase activity; shown to metabolize O-acetyl-ADP-ribose to AMP and acetylated ribose 5'-phosphate		0.190292	-0.104293	1.1328	-0.07996	0.0313644	0.045369	-0.350497	0.153528	0.583738	-0.206975	-0.098121	0.439311	-0.170574	1.1328
YBR111W-A	SUS1	1466445	2	Protein involved in mRNA export coupled transcription activation and elongation; component of both the SAGA histone acetylase complex and TREX-2, and interacts with RNAPII	SAGA complex	0.0692213	-0.04475	0.43075	-0.038429	0.102299	0.032467	0.0074	0.11595	-0.0208763	-0.101928	0.105624	0.180284	0.283539	0.43075
YBR112C	CYC8	852410	2	General transcriptional co-repressor, acts together with Tup1p; also acts as part of a transcriptional co-activator complex that recruits the SWI/SNF and SAGA complexes to promoters; can form the prion [OCT+]	Sko1p/Cyc8p/Tup1 repressor complex|Tup1p/Ssn6p complex	-0.0459194	0.142147	0.531795	-0.204665	-0.274637	-0.120099	-0.196977	-0.0944385	-0.131944	0.175956	0.0051	-0.026229	0.0490975	0.531795
YBR114W	RAD16	852411	2	Protein that recognizes and binds damaged DNA in an ATP-dependent manner (with Rad7p) during nucleotide excision repair; subunit of Nucleotide Excision Repair Factor 4 (NEF4) and the Elongin-Cullin-Socs (ECS) ligase complex	nucleotide-excision repair factor 4 complex|Cul3p-RING ubiquitin ligase complex		0.238904	1.14878	0.066921		0.030474			-0.543646			0.04657	0.556561	1.14878
YBR117C	TKL2	852414	2	Transketolase, similar to Tkl1p; catalyzes conversion of xylulose-5-phosphate and ribose-5-phosphate to sedoheptulose-7-phosphate and glyceraldehyde-3-phosphate in the pentose phosphate pathway; needed for synthesis of aromatic amino acids		-1.45835	2.70378	-0.673906	-2.98917	-0.602668	3.14901	0.44033			3.9337	-1.70771	-0.609828	-0.522706	-0.673906
YBR118W	TEF2	852415	2	Translational elongation factor EF-1 alpha; also encoded by TEF1; functions in the binding reaction of aminoacyl-tRNA (AA-tRNA) to ribosomes; may also have a role in tRNA re-export from the nucleus	eEF1	0.0043546	-0.072321	0.628597	-0.265653	-0.0461386	-0.0150795	-0.0353565	-0.133049	-0.157864	-0.0318965	-0.100499	-0.333319	0.403838	0.628597
YBR119W	MUD1	852416	2	U1 snRNP A protein, homolog of human U1-A; involved in nuclear mRNA splicing	commitment complex|U1 snRNP complex	-0.0654438	0.014979	-0.0941986	0.045741		-0.174031	-0.448105	0.221859	-0.303559	-0.040667	0.123043	0.11686	0.143635	-0.0941986
YBR120C	CBP6	852417	2	Mitochondrial translational activator of the COB mRNA; phosphorylated		-0.0248223	0.252343	0.422938	0.049734	-0.177578	0.391995	-0.186048	0.652486	-0.322718	0.522956	8e-05	0.731398	0.13952	0.422938
YBR121C	GRS1	852418	2	Cytoplasmic and mitochondrial glycyl-tRNA synthase that ligates glycine to the cognate anticodon bearing tRNA; transcription termination factor that may interact with the 3'-end of pre-mRNA to promote 3'-end formation		0.0661773	-0.15942	1.06478	-0.128275	-0.0510248	-0.093059	-0.159228	0.160058	0.0324063	-0.126594	0.010517	-0.329112	0.0257465	1.06478
YBR122C	MRPL36	852419	2	Mitochondrial ribosomal protein of the large subunit; overproduction suppresses mutations in the COX2 leader peptide-encoding region	mitochondrial ribosomal large subunit	0.0768073	0.124969	0.745055	0.011697	-0.0284316	0.306717	0.0516903	0.541585	-0.680738	0.381629	-0.019267	0.808849	0.105508	0.745055
YBR123C	TFC1	852421	2	One of six subunits of the RNA polymerase III transcription initiation factor complex (TFIIIC); part of the TauA globular domain of TFIIIC that binds DNA at the BoxA promoter sites of tRNA and similar genes; human homolog is TFIIIC-63	transcription factor TFIIIC complex	0.0129445	0.17436	0.854414	-0.021819	0.0101152	0.099125	0.004814	-0.225214	-0.262904	0.105681	0.255796	0.008972	0.192872	0.854414
YBR125C	PTC4	852422	2	Cytoplasmic type 2C protein phosphatase (PP2C); identified as a high-copy number suppressor of cnb1 mpk1 synthetic lethality; overexpression decreases high-osmolarity induced Hog1p phosphorylation and kinase activity		0.136632	-0.047355	1.03252	0.346227	0.110559	0.260435	-0.015498	-0.511961	-0.0877594	0.194983	0.331269	0.427265	0.323325	1.03252
YBR126C	TPS1	852423	2	Synthase subunit of trehalose-6-phosphate synthase/phosphatase complex, which synthesizes the storage carbohydrate trehalose; also found in a monomeric form; expression is induced by the stress response and repressed by the Ras-cAMP pathway	alpha,alpha-trehalose-phosphate synthase complex (UDP-forming)	-0.298347	0.482224	0.983743	-0.343143	0.301881	0.455002	0.13564	-0.496096	0.195317	0.938003	-0.326338	0.267737	-0.430139	0.983743
YBR127C	VMA2	852424	2	Subunit B of the eight-subunit V1 peripheral membrane domain of the vacuolar H+-ATPase (V-ATPase), an electrogenic proton pump found throughout the endomembrane system; contains nucleotide binding sites; also detected in the cytoplasm	H+-transporting ATPase, vacuolar|H+-transporting ATPase, Golgi	-0.0135815	-0.207359	0.80306	-0.026892	-0.124079	-0.214657	-0.176356	-0.230881	0.0696769	-0.367338	0.068363	-0.309125	-0.200127	0.80306
YBR129C	OPY1	852426	2	Protein of unknown function, overproduction blocks cell cycle arrest in the presence of mating pheromone; the authentic, non-tagged protein is detected in highly purified mitochondria in high-throughput studies		0.0486943	0.250908	1.25187	0.29578		0.312273	-0.574935	0.228558	-0.615344	-0.025849	0.950118	-0.11249	0.370576	1.25187
YBR130C	SHE3	852427	2	Protein that acts as an adaptor between Myo4p and the She2p-mRNA complex; part of the mRNA localization machinery that restricts accumulation of certain proteins to the bud; also required for cortical ER inheritance		0.0380793	-0.166076	0.735568	0.14034	-0.143828	-0.135561	-0.014053	-0.0335895	-0.033374	-0.053987	0.121534	-0.032038	0.0224185	0.735568
YBR131W	CCZ1	852428	2	Protein involved in vacuolar assembly, essential for autophagy and the cytoplasm-to-vacuole pathway	Mon1p/Ccz1p complex		0.045946	1.06293	0.249906	0.22072	0.063705	0.103721	-0.0290305	0.334712	0.017072		-0.223639	0.441718	1.06293
YBR132C	AGP2	852429	2	High affinity polyamine permease, preferentially uses spermidine over putrescine; expression is down-regulated by osmotic stress; plasma membrane carnitine transporter, also functions as a low-affinity amino acid permease		-0.0357356	0.05485	0.824712		-0.78888			0.411413	-1.5711	0.293667				0.824712
YBR133C	HSL7	852431	2	Protein arginine N-methyltransferase that exhibits septin and Hsl1p-dependent bud neck localization and periodic Hsl1p-dependent phosphorylation; required along with Hsl1p for bud neck recruitment, phosphorylation, and degradation of Swe1p		0.213681	0.146729	0.988024	0.064599	0.163542	-0.051443	-0.464165	0.116451	0.0360666	-0.1921	-0.020407	0.25969	-0.0644575	0.988024
YBR136W	MEC1	852433	2	Genome integrity checkpoint protein and PI kinase superfamily member; signal transducer required for cell cycle arrest and transcriptional responses prompted by damaged or unreplicated DNA; monitors and participates in meiotic recombination		-0.109388	-0.120902	0.441928	1.38456		0.100326	-3.76433		0.222208	-0.032203		0.138444	2.376	0.441928
YBR138C	YBR138C	852435	2	Cytoplasmic protein of unknown function, potentially phosphorylated by Cdc28p; YBR138C is not an essential gene				0.753089	-0.242498	-0.130846	0.309437	0.193572		-0.134628	0.14313		0.0871809	0.0188575	0.753089
YBR139W	YBR139W	852436	2	Putative serine type carboxypeptidase with a role in phytochelatin synthesis; green fluorescent protein (GFP)-fusion protein localizes to the vacuole; expression induced by nitrogen limitation in a GLN3, GAT1-independent manner		-0.189868	0.275388	0.835198	-0.012982	0.10835	0.268864	0.169444	-0.174006	0.38316	0.520651	-0.082687	0.355033	-0.1304	0.835198
YBR140C	IRA1	852437	2	GTPase-activating protein that negatively regulates RAS by converting it from the GTP- to the GDP-bound inactive form, required for reducing cAMP levels under nutrient limiting conditions, mediates membrane association of adenylate cyclase		-0.0984467	0.318742	0.836267	0.07135	0.0429219	-0.357415	0.131592	0.0193115	-0.165542	0.181503	-0.272267	0.602186	0.155717	0.836267
YBR142W	MAK5	852439	2	Essential nucleolar protein, putative DEAD-box RNA helicase required for maintenance of M1 dsRNA virus; involved in biogenesis of large (60S) ribosomal subunits		0.0816793	-0.048412	0.985873	0.109234	0.0383763	-0.022028	0.001575	0.108903	-0.0194034	0.046461	0.139105	-0.28038	-0.0591805	0.985873
YBR143C	SUP45	852440	2	Polypeptide release factor (eRF1) in translation termination; mutant form acts as a recessive omnipotent suppressor; methylated by Mtq2p-Trm112p in ternary complex eRF1-eRF3-GTP; mutation of methylation site confers resistance to zymocin	translation release factor complex	0.0444883	-0.008952	1.07324	-0.038114	-0.0319405	-0.008251	0.036243	0.157614	0.163036	-0.062501	0.066892	-0.23736	0.0037465	1.07324
YBR145W	ADH5	852442	2	Alcohol dehydrogenase isoenzyme V; involved in ethanol production		0.811183	-0.109345	0.30676	1.29104	-1.05032	-0.810267	-1.24461	0.980996	0.621106	-1.56842	1.60515	-0.954978	-0.799368	0.30676
YBR146W	MRPS9	852443	2	Mitochondrial ribosomal protein of the small subunit	mitochondrial ribosomal small subunit	-0.0163514	0.216553	0.696871	0.159391	-0.0127915	0.367735	0.016496	1.02283	-0.642569	0.450536	0.103455	0.716972	-0.107742	0.696871
YBR149W	ARA1	852446	2	NADP+ dependent arabinose dehydrogenase, involved in carbohydrate metabolism; purified as homodimer; naturally occurs with a N-terminus degradation product		-0.294675	0.003222	0.975633	-0.122487	-0.0615478	-0.000225	-0.167225	-0.238956	-0.243906	0.363645	0.394799	0.761538	-0.238825	0.975633
YBR150C	TBS1	852447	2	Putative protein of unknown function; the authentic, non-tagged protein is detected in highly purified mitochondria in high-throughput studies				-5.09764							0.052517			-1.97137	-5.09764
YBR151W	APD1	852448	2	Protein of unknown function, required for normal localization of actin patches and for normal tolerance of sodium ions and hydrogen peroxide; localizes to both cytoplasm and nucleus		-0.0631507	0.170057	1.23648	-0.163871	0.0717726	0.139218	0.012602	0.0401885	0.186829	0.0848109	-0.210711	0.639107	0.0338345	1.23648
YBR152W	SPP381	852449	2	mRNA splicing factor, component of U4/U6.U5 tri-snRNP; interacts genetically and physically with Prp38p	U4/U6 x U5 tri-snRNP complex	0.307966	0.057045	0.8206	-0.201894	-0.467846	-0.034868	0.157574		-0.258479	0.381444	-0.567171	-0.22809	-0.0862765	0.8206
YBR153W	RIB7	852450	2	Diaminohydroxyphoshoribosylaminopyrimidine deaminase; catalyzes the second step of the riboflavin biosynthesis pathway		0.474633	0.079943	0.918854	-0.076213		-0.370251	-0.189396	0.368101	-0.989646	-0.091558	-0.158036	0.938064	0.0900275	0.918854
YBR154C	RPB5	852451	2	RNA polymerase subunit ABC27, common to RNA polymerases I, II, and III; contacts DNA and affects transactivation	DNA-directed RNA polymerase II complex|DNA-directed RNA polymerase I complex|DNA-directed RNA polymerase III complex	0.0894443	-0.076986	1.01138	-0.05243	0.0043075	0.028784	-0.260776	-0.0531435	0.273418	-0.128179	-0.228276	-0.299802	-0.0463935	1.01138
YBR155W	CNS1	852452	2	TPR-containing co-chaperone; binds both Hsp82p (Hsp90) and Ssa1p (Hsp70) and stimulates the ATPase activity of SSA1, ts mutants reduce Hsp82p function while over expression suppresses the phenotypes of an HSP82 ts allele and a cpr7 deletion		0.0870753	-0.156421	1.06373	-0.017439	0.359784	-0.015412	0.140881	0.181094	0.0546039	-0.051295	0.148494	-0.29761	0.0241295	1.06373
YBR159W	IFA38	852456	2	Microsomal beta-keto-reductase; contains oleate response element (ORE) sequence in the promoter region; mutants exhibit reduced VLCFA synthesis, accumulate high levels of dihydrosphingosine, phytosphingosine and medium-chain ceramides		-0.0573747	-0.035058	0.923934	-0.036314	0.174862	0.047842	0.169513	-0.0032735	-0.0922966	0.0900916	0.106801	-0.299485	0.253749	0.923934
YBR160W	CDC28	852457	2	Catalytic subunit of the main cell cycle cyclin-dependent kinase (CDK); alternately associates with G1 cyclins (CLNs) and G2/M cyclins (CLBs) which direct the CDK to specific substrates	Cdc28p/Clb5p complex|Cdc28p/Cln2p complex|Cdc28p/Clb1p complex|Cdc28p/Clb6p complex|Cdc28p/Cln1p complex|Cdc28p/Clb3p complex|Cdc28p/Cln3p complex|Cdc28p/Clb4p complex|Cdc28p/Clb2p complex	-0.0331093	0.119204	1.08709	-0.276901	0.0589328	0.073582	-0.09422	-0.222211	0.468919	0.037034	-0.46314	0.193143	0.214975	1.08709
YBR162C	TOS1	852459	2	Covalently-bound cell wall protein of unknown function; identified as a cell cycle regulated SBF target gene; deletion mutants are highly resistant to treatment with beta-1,3-glucanase; has sequence similarity to YJL171C		-0.0719765	0.109721	1.39194	0.109629	-0.523662	-0.139282	-0.127379	-0.291807	0.480533	-0.022047	1.49056	0.428015	0.353202	1.39194
YBR164C	ARL1	852462	2	Soluble GTPase with a role in regulation of membrane traffic; regulates potassium influx; G protein of the Ras superfamily, similar to ADP-ribosylation factor		0.0520263	-0.063028	0.842964	-0.264348		0.090729	0.809828	-0.333328	0.21991	0.162854	0.254672	0.1648	-0.361776	0.842964
YBR166C	TYR1	852464	2	Prephenate dehydrogenase involved in tyrosine biosynthesis, expression is dependent on phenylalanine levels		-0.0307433	-0.037279	0.946553	0.479247	0.152	0.046312	0.04418	0.498163	0.405581	-0.284989	0.238705	0.039231	0.0635025	0.946553
YBR167C	POP7	852465	2	Subunit of both RNase MRP, which cleaves pre-rRNA, and nuclear RNase P, which cleaves tRNA precursors to generate mature 5' ends	nucleolar ribonuclease P complex|ribonuclease MRP complex	-0.105707		0.185146				-0.117813		-0.0078364		0.060957	0.355391	-0.0433155	0.185146
YBR169C	SSE2	852467	2	Member of the heat shock protein 70 (HSP70) family; may be involved in protein folding; localized to the cytoplasm; highly homologous to the heat shock protein Sse1p		-0.492832	0.900553	0.622472	-0.696955	0.633848	1.09208	0.488439	-0.406778	0.690304	0.807972	-0.729675	0.261269	-0.659048	0.622472
YBR170C	NPL4	852468	2	Endoplasmic reticulum and nuclear membrane protein, forms a complex with Cdc48p and Ufd1p that recognizes ubiquitinated proteins in the endoplasmic reticulum and delivers them to the proteasome for degradation	Cdc48p complex	0.0359519	0.005648	1.31028	0.023947	0.212951	0.144257	0.194369	0.0151835	0.167007	0.148557	0.222836	0.306417	0.0751135	1.31028
YBR171W	SEC66	852469	2	Non-essential subunit of Sec63 complex (Sec63p, Sec62p, Sec66p and Sec72p); with Sec61 complex, Kar2p/BiP and Lhs1p forms a channel competent for SRP-dependent and post-translational SRP-independent protein targeting and import into the ER	Sec62p/Sec63p complex	-0.0035925	-0.067456	-0.156008	0.091299	0.338141	0.027934	0.243388	-0.150361	0.239934	0.127431	0.130545	-0.033409	0.143377	-0.156008
YBR172C	SMY2	852470	2	Protein of unknown function involved in COPII vesicle formation; interacts with the Sec23p/Sec24p subcomplex; overexpression suppresses the temperature sensitivity of a myo2 mutant; has similarity to S. pombe Mpd2		0.009021	0.109521	1.00844	-0.226591	-0.0148678	-0.024311	-0.064188	0.0132425	0.385231	-0.006971	-0.054087	-0.013654	-0.101859	1.00844
YBR173C	UMP1	852471	2	Short-lived chaperone required for correct maturation of the 20S proteasome; may inhibit premature dimerization of proteasome half-mers; degraded by proteasome upon completion of its assembly				1.93458	0.519218	0.370875	-0.025389	-0.481633		0.667968	-0.576338	0.651704	0.156377	-0.163427	1.93458
YBR176W	ECM31	852474	2	Ketopantoate hydroxymethyltransferase, required for pantothenic acid biosynthesis, converts 2-oxoisovalerate into 2-dehydropantoate		0.121749	0.072374	1.12849	0.167117	0.314719	0.015643	0.116454	0.0760205	0.0982899	0.100724	0.195075	-0.070753	-0.165977	1.12849
YBR177C	EHT1	852476	2	Acyl-coenzymeA:ethanol O-acyltransferase that plays a minor role in medium-chain fatty acid ethyl ester biosynthesis; possesses short-chain esterase activity; localizes to lipid particles and the mitochondrial outer membrane		-0.0064607	0.148659	0.82382	0.343638	-0.26758	0.317113	-0.53472	0.0537985	-0.0994791	-0.250266	-0.56643	-0.400871	0.102251	0.82382
YBR179C	FZO1	852477	2	Mitofusin, mitochondrial integral membrane protein involved in mitochondrial fusion and mitochondrial genome maintenance; contains N-terminal GTPase domain; targeted for destruction by cytosolic components of the ubiquitin-proteasome system	Mgm1p/Ugo1p/Fzo1p complex	0.0674723	-0.020782	0.963954	0.282427	-0.0002082	0.207866	0.034314	0.354155	-0.731806	0.313008	0.18603	0.247	0.206599	0.963954
YBR181C	RPS6B	852479	2	Protein component of the small (40S) ribosomal subunit; identical to Rps6Ap and has similarity to rat S6 ribosomal protein	cytoplasmic ribosomal small subunit	0.0215967	-0.044182	0.002674	-0.294608	-0.0295927	-0.0747595	0.0493232	0.151796	-0.0301013	-0.127023	-0.22322	-0.390989	-0.100901	0.002674
YBR185C	MBA1	852483	2	Membrane-associated mitochondrial ribosome receptor; involved in assembly of mitochondrial respiratory complexes; may act as a receptor for proteins destined for export from the mitochondrial matrix to the inner membrane		-0.0559905	0.099153	1.1107	0.136555	0.692298	0.272858			-0.82781	0.301844		0.659815	-0.0029835	1.1107
YBR187W	GDT1	852485	2	Putative protein of unknown function; expression is reduced in a gcr1 null mutant; GFP-fusion protein localizes to the vacuole; expression pattern and physical interactions suggest a possible role in ribosome biogenesis		0.0575033	-0.020974	1.20886	-0.24838	-0.174418	0.007678	0.044643	0.246658	-0.271101	-0.423623	-0.4792	-0.331765	0.0426425	1.20886
YBR188C	NTC20	852486	2	Member of the NineTeen Complex (NTC) that contains Prp19p and stabilizes U6 snRNA in catalytic forms of the spliceosome containing U2, U5, and U6 snRNAs	Prp19-associated complex	-0.0971194	1.45231		0.134278	0.136529	-0.176422	-0.051138	0.516127	-0.151143	0.00926	0.265883	0.271104	-0.0918645
YBR189W	RPS9B	852487	2	Protein component of the small (40S) ribosomal subunit; nearly identical to Rps9Ap and has similarity to E. coli S4 and rat S9 ribosomal proteins	cytoplasmic ribosomal small subunit	-0.596846	-0.056314	0.01156	-0.327965	0.103206	-0.0498425	0.0473665	0.12376	0.0177793	-0.137138	-0.256573	-0.29958	-0.228765	0.01156
YBR191W	RPL21A	852489	2	Protein component of the large (60S) ribosomal subunit, nearly identical to Rpl21Bp and has similarity to rat L21 ribosomal protein	cytoplasmic ribosomal large subunit	-0.0019859	-0.004173	-0.019833	-0.283373	-0.0173906	-0.0178265	0.0326525	0.154566	-0.0133683	-0.116001	-0.259457	-0.460286	-0.201908	-0.019833
YBR192W	RIM2	852491	2	Mitochondrial pyrimidine nucleotide transporter; imports pyrimidine nucleoside triphosphates and exports pyrimidine nucleoside monophosphates; member of the mitochondrial carrier family		-0.0313201	-0.057592	1.24149	0.040553	-0.0916298	0.212765	0.100583	0.785016	-0.673078	0.314573	-0.199473	0.437675	0.115593	1.24149
YBR193C	MED8	852492	2	Subunit of the RNA polymerase II mediator complex; associates with core polymerase subunits to form the RNA polymerase II holoenzyme; essential for transcriptional regulation	Kornberg's mediator (SRB) complex	-0.0090442	0.005976	0.0480825	-0.264244	-0.0691918	-0.298316	0.0583523	-0.2914	-0.0679707	-0.128995	-0.162107	0.0770163	0.0012235	0.0480825
YBR194W	AIM4	852493	2	Protein proposed to be associated with the nuclear pore complex; null mutant is viable, displays elevated frequency of mitochondrial genome loss and is sensitive to freeze-thaw stress			-0.140174	0.496044					-0.0573995	-0.756145			0.037028	0.857013	0.496044
YBR195C	MSI1	852494	2	Subunit of chromatin assembly factor I (CAF-1), negative regulator of the RAS/cAMP pathway via sequestration of Npr1p kinase; localizes to the nucleus and cytoplasm; homologous to human retinoblastoma binding proteins RbAp48 and RbAp46	chromatin assembly complex	0.114696	0.185315	1.0741	0.196699	-0.494966	-0.099451	-0.607261	-0.187224	-0.391003	0.22144	-0.251188	-0.162593	-0.335359	1.0741
YBR196C	PGI1	852495	2	Glycolytic enzyme phosphoglucose isomerase, catalyzes the interconversion of glucose-6-phosphate and fructose-6-phosphate; required for cell cycle progression and completion of the gluconeogenic events of sporulation		-0.029154	-0.158492	0.683037	-0.286867	-0.0160781	-0.2396	-0.237512	-0.199423	0.465587	-0.65919	-0.033592	-0.327	-0.129384	0.683037
YBR197C	YBR197C	852496	2	Putative protein of unknown function; green fluorescent protein (GFP)-fusion protein localizes to the cytoplasm and nucleus; YBR197C is not an essential gene		0.436611	-0.223544	1.10873	0.042222	0.0126653		-0.152151	0.170438	-0.128012	-0.004712			-0.128978	1.10873
YBR198C	TAF5	852497	2	Subunit (90 kDa) of TFIID and SAGA complexes, involved in RNA polymerase II transcription initiation and in chromatin modification	transcription factor TFIID complex|SAGA complex|SLIK (SAGA-like) complex	-0.0223509	0.073837	0.969403	-0.012769	0.0095912	-0.150782	-0.03966	-0.120916	-0.0684817	0.031308	0.060014	0.001782	0.0471915	0.969403
YBR199W	KTR4	852498	2	Putative mannosyltransferase involved in protein glycosylation; member of the KRE2/MNT1 mannosyltransferase family		-0.300476	-0.254983	0.6097	0.185631	0.0142977	-0.053698	-0.29092	0.980166	0.153699	-0.255995	-0.02375	0.144826	-0.198881	0.6097
YBR200W	BEM1	852499	2	Protein containing SH3-domains, involved in establishing cell polarity and morphogenesis; functions as a scaffold protein for complexes that include Cdc24p, Ste5p, Ste20p, and Rsr1p		0.0768103	-0.090955	1.18903	0.193697	-0.115259	-0.104129	-0.183179	-0.0392085	-0.148359	-0.139763	0.186479	-0.174494	0.200751	1.18903
YBR202W	MCM7	852501	2	Component of the hexameric MCM complex, which is important for priming origins of DNA replication in G1 and becomes an active ATP-dependent helicase that promotes DNA melting and elongation when activated by Cdc7p-Dbf4p in S-phase	Mcm2-7 complex	-0.0294239	0.287683	1.21775	-0.06447	-0.262403	-0.120811	-0.035834	0.0789515	-0.110187	-0.256688	-0.295608	0.013151	0.245962	1.21775
YBR204C	YBR204C	852503	2	Serine hydrolase; YBR204C is not an essential gene		-0.188081	0.192409	1.1073	-0.245926		0.306101	0.225015	-0.17337	0.302076	0.182148	0.135328	0.418614	-0.15072	1.1073
YBR205W	KTR3	852504	2	Putative alpha-1,2-mannosyltransferase involved in O- and N-linked protein glycosylation; member of the KRE2/MNT1 mannosyltransferase family		-0.0180075	-0.172695	1.00097	-0.15128	0.105255	0.012566	0.003887	0.0500185	-0.27017	-0.020019	0.092013	-0.033198	0.0908845	1.00097
YBR207W	FTH1	852506	2	Putative high affinity iron transporter involved in transport of intravacuolar stores of iron; forms complex with Fet5p; expression is regulated by iron; proposed to play indirect role in endocytosis	Fth1p/Fet5p complex	-0.42179		0.0137355	0.057776				-3.37068	0.562412			-0.140582	0.0408595	0.0137355
YBR208C	DUR1	852507	2	Urea amidolyase, contains both urea carboxylase and allophanate hydrolase activities, degrades urea to CO2 and NH3; expression sensitive to nitrogen catabolite repression and induced by allophanate, an intermediate in allantoin degradation		-0.523681	0.127361	0.948714	1.15786	-0.616143	0.066364	-0.616231		0.210752	-0.524778	-0.645324	-1.73882	-2.36087	0.948714
YBR211C	AME1	852512	2	Essential kinetochore protein associated with microtubules and spindle pole bodies; component of the kinetochore sub-complex COMA (Ctf19p, Okp1p, Mcm21p, Ame1p); involved in spindle checkpoint maintenance	COMA complex		-0.153027	0.6805		-0.411665	-0.113429	1.3338		-0.121486	1.70287	-0.130524	-0.020443	0.0567645	0.6805
YBR212W	NGR1	852513	2	RNA binding protein that negatively regulates growth rate; interacts with the 3' UTR of the mitochondrial porin (POR1) mRNA and enhances its degradation; overexpression impairs mitochondrial function; expressed in stationary phase		0.121396	0.078948	1.10152	0.269957	0.190716	-0.036459	0.228044	-0.0113565	-0.482528	0.43522	0.64255	0.737448	0.195125	1.10152
YBR213W	MET8	852514	2	Bifunctional dehydrogenase and ferrochelatase, involved in the biosynthesis of siroheme, a prosthetic group used by sulfite reductase; required for sulfate assimilation and methionine biosynthesis		0.584842	-0.034585	1.14875	0.492056	-0.431999	-0.114002	-0.761018	0.543573	-0.477249	-0.086106	-0.447732	0.554229	-0.184525	1.14875
YBR214W	SDS24	852515	2	One of two S. cerevisiae homologs (Sds23p and Sds24p) of the S. pombe Sds23 protein, which is implicated in APC/cyclosome regulation; involved in cell separation during budding; may play an indirect role in fluid-phase endocytosis		-0.360706	0.636716	0.954753	-0.290922	0.392985	0.597441	0.119567	-0.414437	0.388785	0.482909	-0.159405	0.353379	-0.420233	0.954753
YBR215W	HPC2	852516	2	Subunit of the HIR complex, a nucleosome assembly complex involved in regulation of histone gene transcription; mutants display synthetic defects with subunits of FACT, a complex that allows passage of RNA Pol II through nucleosomes	HIR complex	0.124796	0.085655	0.662447	-0.05732	0.224091	0.009082	0.102819	-5.15122	-0.137424	0.056007	0.112626	0.355191	-0.0205425	0.662447
YBR218C	PYC2	852519	2	Pyruvate carboxylase isoform, cytoplasmic enzyme that converts pyruvate to oxaloacetate; highly similar to isoform Pyc1p but differentially regulated; mutations in the human homolog are associated with lactic acidosis		0.188821	-0.177837	0.688304	0.055902	-0.500364	-0.516124	-0.688944	0.0091495	-0.500086	-0.882443	0.596182	-0.973818	-0.785118	0.688304
YBR221C	PDB1	852522	2	E1 beta subunit of the pyruvate dehydrogenase (PDH) complex, which is an evolutionarily-conserved multi-protein complex found in mitochondria	mitochondrial pyruvate dehydrogenase complex	0.161521	-0.219719	0.294536	0.212069	-0.218801	-0.272911	-0.302997	-0.0703905	-0.438069	-0.424058	-0.00369	0.039109	-0.198989	0.294536
YBR222C	PCS60	852523	2	Peroxisomal protein that binds AMP and mRNA, localizes to both the peroxisomal peripheral membrane and matrix, expression is highly inducible by oleic acid, similar to E. coli long chain acyl-CoA synthetase		-0.0877343	0.145431	1.11365	-0.082543	0.0917383	0.241597	-0.216683	0.246441	0.353229	-0.321596	-0.294585	-0.081981	-0.145003	1.11365
YBR223C	TDP1	852525	2	Tyrosyl-DNA Phosphodiesterase I, hydrolyzes 3' and 5'-phosphotyrosyl bonds, involved in the repair of DNA lesions created by topoisomerase I and topoisomerase II; mutations in human homolog result in the neurodegenerative disease SCANI				0.796014			2.14672	0.40647		-0.473867	0.393135				0.796014
YBR225W	YBR225W	852526	2	Putative protein of unknown function; non-essential gene identified in a screen for mutants affected in mannosylphophorylation of cell wall components		-0.261254	0.176923	1.09495	-0.146118	-0.0355438	0.011655	-0.080954	-0.0074475	0.0297403	0.286673	0.001821	0.517081	-0.0162225	1.09495
YBR227C	MCX1	852528	2	Mitochondrial matrix protein; putative ATP-binding chaperone with non-proteolytic function; similar to bacterial ClpX proteins		0.23777	-0.149954	0.994604	0.432672	0.124312	0.015612	-0.122021	-0.0685255	0.0272245	-0.07637	0.392167	-0.135338	0.0766135	0.994604
YBR229C	ROT2	852530	2	Glucosidase II catalytic subunit required for normal cell wall synthesis; mutations in rot2 suppress tor2 mutations, and are synthetically lethal with rot1 mutations	Rot2p/Gtb1p complex	-0.0755967	-0.143791	0.972644	-0.113044	0.309153	0.052184	0.413346	0.0325305	-0.18908	0.059612	0.478622	0.191158	0.345606	0.972644
YBR230C	OM14	852531	2	Integral mitochondrial outer membrane protein; abundance is decreased in cells grown in glucose relative to other carbon sources; appears to contain 3 alpha-helical transmembrane segments; ORF encodes a 97-basepair intron		-0.165807	0.51895	0.978394	-0.550091	0.179813	0.600635	0.264529	0.437341	-0.0572561	0.845613	-1.01439	0.556949	-0.634904	0.978394
YBR231C	SWC5	852532	2	Protein of unknown function, component of the SWR1 complex, which exchanges histone variant H2AZ (Htz1p) for chromatin-bound histone H2A	Swr1p complex	0.0419763	-0.159577	0.977414	0.164458	-0.130834	0.068838	-0.104359	0.316118	0.0541249	0.251491	0.209435	-0.232931	0.0544875	0.977414
YBR233W	PBP2	852533	2	RNA binding protein with similarity to mammalian heterogeneous nuclear RNP K protein, involved in the regulation of telomere position effect and telomere length		0.116629	-0.178379	1.18885	0.22682				0.0178605	-0.656747		0.355143	0.454138	0.12517	1.18885
YBR233W-A	DAD3	852535	2	Essential subunit of the Dam1 complex (aka DASH complex), couples kinetochores to the force produced by MT depolymerization thereby aiding in chromosome segregation; is transferred to the kinetochore prior to mitosis	DASH complex	-0.14573	0.070859	0.474455	-0.026958	-0.174209	0.136677	-0.060082	0.163973	-0.263109	-0.168474	-0.002666	-0.095451	0.0180185	0.474455
YBR234C	ARC40	852536	2	Subunit of the ARP2/3 complex, which is required for the motility and integrity of cortical actin patches	Arp2/3 protein complex	-0.0976713	-0.067224	0.218011	0.242146	-0.007401	0.076618	0.0939884	-0.181606	-0.006085	-0.016332	0.130174	0.211976	-0.0250915	0.218011
YBR235W	YBR235W	852537	2	Putative ion transporter, similar to mammalian electroneutral Na(+)-(K+)-C1- cotransporter family; YBR235W is not an essential gene		-0.0785815		1.01718	-0.133302		0.070491	0.288142	-0.340365	0.0472549	-0.019034	-0.55901	0.006358	0.0452515	1.01718
YBR236C	ABD1	852538	2	Methyltransferase, catalyzes the transfer of a methyl group from S-adenosylmethionine to the GpppN terminus of capped mRNA		0.0730213	-0.171906	0.982164	0.077641	-0.144744	-0.09489	-0.204795	-0.125125	0.0725759	-0.267076	-0.051827	-0.041609	-0.0810595	0.982164
YBR237W	PRP5	852539	2	RNA helicase in the DEAD-box family, necessary for prespliceosome formation, bridges U1 and U2 snRNPs and enables stable U2 snRNP association with intron RNA		0.116341	-0.273037	0.568269	0.347729	0.0336641	-0.100714	0.01242		0.277639	-0.02635	0.369473	-0.009088	0.165748	0.568269
YBR238C	YBR238C	852540	2	Mitochondrial membrane protein with similarity to Rmd9p; not required for respiratory growth but causes a synthetic respiratory defect in combination with rmd9 mutations; transcriptionally up-regulated by TOR; deletion increases life span			-0.203045	0.22778	-0.503736	0.266522	-0.143266	0.0664752		0.530412	-0.764858	0.079222		-0.310756	0.22778
YBR239C	YBR239C	852541	2	Transcriptional regulator of nonfermentable carbon utilization; GFP-fusion protein localizes to cytoplasm, nucleus; null mutation affects periodicity of transcriptional and metabolic oscillation; plays role in restricting Ty1 transposition		1.2188	0.16653	0.982083	0.25148		1.06424			-0.135127			-0.202115	0.599922	0.982083
YBR242W	YBR242W	852544	2	Putative protein of unknown function; green fluorescent protein (GFP)-fusion protein localizes to the cytoplasm and nucleus; YBR242W is not an essential gene		-0.0364598	-0.194134	0.818875	-0.159874	0.18265	0.068957	-0.123745	0.327701	0.572214	-0.577069	-0.229624	-0.022117	-0.183217	0.818875
YBR244W	GPX2	852546	2	Phospholipid hydroperoxide glutathione peroxidase induced by glucose starvation that protects cells from phospholipid hydroperoxides and nonphospholipid peroxides during oxidative stress		-0.107661	0.127287	1.13737	0.608975	1.70179	0.256993	0.520325	0.406829	0.431862	1.07498	1.31958	-0.355423	-0.529607	1.13737
YBR245C	ISW1	852547	2	Member of the imitation-switch (ISWI) class of ATP-dependent chromatin remodeling complexes; ATPase that forms a complex with Ioc2p and Ioc4p to regulate transcription elongation, and a complex with Ioc3p to repress transcription initiation	ISW1a complex|ISW1b complex	0.0312102	0.010347	1.04745	0.123956	-0.011837	-0.025284	0.0754166	-0.0064355	-0.047502	-0.046922	0.210866	-0.143638	-0.0090885	1.04745
YBR246W	RRT2	852548	2	Putative protein of unknown function; non-essential gene identified in a screen for mutants with increased levels of rDNA transcription; null mutants display a weak carboxypeptidase Y missorting/secretion phenotype		-0.130696	0.106877	0.674424			-1.18683		0.155579	1.10978	-0.689301			-0.297952	0.674424
YBR247C	ENP1	852549	2	Protein associated with U3 and U14 snoRNAs, required for pre-rRNA processing and 40S ribosomal subunit synthesis; localized in the nucleus and concentrated in the nucleolus		0.0475793	-0.066841	1.01883	0.035456	0.158207	-0.07996	0.0622288	0.171394	-0.035667	0.033483	-0.058409	-0.157472	0.0667505	1.01883
YBR248C	HIS7	852550	2	Imidazole glycerol phosphate synthase (glutamine amidotransferase:cyclase), catalyzes the fifth and sixth steps of histidine biosynthesis and also produces 5-aminoimidazole-4-carboxamide ribotide (AICAR), a purine precursor		0.25002	0.017669	0.811894	0.541702	-0.320171	-0.179772	-0.588296	0.0908765	0.188153	-0.487906	0.636692	-0.682813	-0.391177	0.811894
YBR249C	ARO4	852551	2	3-deoxy-D-arabino-heptulosonate-7-phosphate (DAHP) synthase, catalyzes the first step in aromatic amino acid biosynthesis and is feedback-inhibited by tyrosine or high concentrations of phenylalanine or tryptophan		0.436622	-0.040424	0.972893	0.188688	-0.165459	0.025872	-0.248111	0.677555	0.325957	-0.605552	0.830728	-0.402075	-0.22208	0.972893
YBR251W	MRPS5	852553	2	Mitochondrial ribosomal protein of the small subunit	mitochondrial ribosomal small subunit	-0.12874	0.261716	0.477243	0.202001	0.762341	0.602659	0.0922319	1.0016	-0.572729	0.542988	-0.028888	0.589598	0.0217015	0.477243
YBR252W	DUT1	852554	2	dUTPase, catalyzes hydrolysis of dUTP to dUMP and PPi, thereby preventing incorporation of uracil into DNA during replication; critical for the maintenance of genetic stability		0.0626213	0.024569	1.14242	-0.096237	-0.211609	-0.02428	-0.235627	0.0385605	-0.348228	-0.312696	-0.182911	-0.095387	-0.0266415	1.14242
YBR253W	SRB6	852555	2	Subunit of the RNA polymerase II mediator complex; associates with core polymerase subunits to form the RNA polymerase II holoenzyme; essential for transcriptional regulation	Kornberg's mediator (SRB) complex	-0.0393497	-0.015661	0.484846	0.189363	-0.19573	-0.031023	0.134404	-0.281547	0.0878579	-0.159048	-0.332277	0.042871	0.0133025	0.484846
YBR255W	MTC4	852557	2	Protein of unknown function, required for normal growth rate at 15 degrees C; green fluorescent protein (GFP)-fusion protein localizes to the cytoplasm in a punctate pattern; mtc4 is synthetically sick with cdc13-1		0.0902463	0.275621	1.19799	0.663744	-0.0346785	0.0461		0.496492	0.172566	0.121163	-0.142302	0.406608	0.214177	1.19799
YBR256C	RIB5	852559	2	Riboflavin synthase; catalyzes the last step of the riboflavin biosynthesis pathway		0.49554	-0.085794	1.30205	0.781174	-0.685795	-0.19348	-0.691163	0.720395	0.0766769	-0.683336	0.663168	-0.541814	-0.564885	1.30205
YBR257W	POP4	852560	2	Subunit of both RNase MRP, which cleaves pre-rRNA, and nuclear RNase P, which cleaves tRNA precursors to generate mature 5' ends; binds to the RPR1 RNA subunit in RNase P	nucleolar ribonuclease P complex|ribonuclease MRP complex	-0.130542	-0.053293	0.261375		0.0053637	-0.106669	0.199625	0.129878	-0.351775	0.301479	0.352313	-0.197419	-0.0747725	0.261375
YBR258C	SHG1	852561	2	Subunit of the COMPASS (Set1C) complex, which methylates histone H3 on lysine 4 and is required in transcriptional silencing near telomeres	COMPASS complex	0.0722513	0.260332	0.842983	-0.431509	0.311727	0.18397	-0.195017	0.207832	0.405503	0.130225	-0.140052	0.307038	-0.0721875	0.842983
YBR260C	RGD1	852563	2	GTPase-activating protein (RhoGAP) for Rho3p and Rho4p, possibly involved in control of actin cytoskeleton organization		0.0363424	0.097639	0.834121	-0.175864	-0.0681678	0.026292	0.0688314	0.0364465	-0.0908091	-0.098751	0.045555	-0.083529	0.0669905	0.834121
YBR261C	TAE1	852564	2	AdoMet-dependent proline methyltransferase; catalyzes the dimethylation of ribosomal proteins Rpl12 and Rps25 at N-terminal proline residues; has a role in protein synthesis; fusion protein localizes to the cytoplasm		0.0973693	-0.338077	1.04373	0.078492	0.0687055	-0.232699	-0.291549	-0.234711	-0.0511563	-0.296835	-0.072752	-0.344668	-0.0600845	1.04373
YBR262C	AIM5	852566	2	Protein of unknown function; the authentic, non-tagged protein is detected in purified mitochondria in high-throughput studies; null mutant displays elevated frequency of mitochondrial genome loss		0.0030823	0.45808	0.939373	0.146463	-0.0798998	0.375821	0.0694515		-0.558995	0.384231	0.120485	0.635016	-0.0558365	0.939373
YBR263W	SHM1	852565	2	Mitochondrial serine hydroxymethyltransferase, converts serine to glycine plus 5,10 methylenetetrahydrofolate; involved in generating precursors for purine, pyrimidine, amino acid, and lipid biosynthesis; reverse reaction generates serine		0.108501	-0.159908	0.906104	-0.141343	-0.102955	-0.079619	-0.156156	0.0780155	-0.187653	-0.191997	0.12117	0.04788	-0.0655125	0.906104
YBR264C	YPT10	852567	2	Rab family GTP-binding protein that contains the PEST signal sequence specific for proteolytic enzymes; may be involved in vesicular transport; overexpression leads to accumulation of Golgi-like cisternae with budding vesicles		-0.0922026	0.087164	0.896134	0.215458	0.0442806	0.13902	0.014047	-0.207671	0.0340987	0.0917222	-0.08541	0.84334	-0.104473	0.896134
YBR265W	TSC10	852568	2	3-ketosphinganine reductase, catalyzes the second step in phytosphingosine synthesis, essential for growth in the absence of exogenous dihydrosphingosine or phytosphingosine, member of short chain dehydrogenase/reductase protein family		0.102797	-0.010216	1.12844			0.12894		0.431335	-0.611666	-0.100505	0.456516	0.665558	-0.124382	1.12844
YBR267W	REI1	852569	2	Cytoplasmic pre-60S factor; required for the correct recycling of shuttling factors Alb1, Arx1 and Tif6 at the end of the ribosomal large subunit biogenesis; involved in bud growth in the mitotic signaling network		0.0624153	-0.01026	0.955543	-0.228192	0.0552061	-0.050147	0.0744519	0.382354	0.0640969	0.053074	-0.160996	-0.416507	0.284017	0.955543
YBR269C	FMP21	852572	2	Putative protein of unknown function; the authentic, non-tagged protein is detected in highly purified mitochondria in high-throughput studies		-0.0407068	0.864444	0.969784	0.198069	0.232334	0.761949	0.250192	0.478835	-0.17468	0.918291	0.419789	0.623145	-0.12956	0.969784
YBR271W	YBR271W	852574	2	Putative S-adenosylmethionine-dependent methyltransferase of the seven beta-strand family; green fluorescent protein (GFP)-fusion protein localizes to the cytoplasm; predicted to be involved in ribosome biogenesis		-0.999066	-0.101459	1.25485	0.112914	0.152133	-0.209279	0.0757706	0.403826	0.0008526	0.058523	-0.028489	-0.107378	0.0598875	1.25485
YBR272C	HSM3	852575	2	Proteasome-interacting protein involved in the assembly of the base subcomplex of the 19S proteasomal regulatory particle (RP); involved in DNA mismatch repair during slow growth; weak similarity to Msh1p; related to human 19S subunit S5b		0.0322116	0.081115	0.996043	0.013545	-0.0261349	0.178646	-0.015075	0.116678	0.349421	-0.159823	0.01703	0.290091	0.0666185	0.996043
YBR273C	UBX7	852576	2	UBX (ubiquitin regulatory X) domain-containing protein that interacts with Cdc48p		0.0303165	-0.075658	1.07216	0.268597	0.0319604	-0.05524	0.283687	-0.920369	-0.155519	0.069914	0.195178	0.349733	0.0704915	1.07216
YBR274W	CHK1	852577	2	Serine/threonine kinase and DNA damage checkpoint effector, mediates cell cycle arrest via phosphorylation of Pds1p; phosphorylated by checkpoint signal transducer Mec1p; homolog of S. pombe and mammalian Chk1 checkpoint kinase		0.138312		0.510019					-0.93614	-0.524064	0.044867	0.18507	-0.096687	-0.965749	0.510019
YBR275C	RIF1	852578	2	Protein that binds to the Rap1p C-terminus and acts synergistically with Rif2p to help control telomere length and establish telomeric silencing; deletion results in telomere elongation		-0.0497296	0.070887	1.12752	0.167687	0.0984082	-0.151861	0.607593	0.143015	-0.175654	-0.026621	-0.309357	0.010796	0.0496765	1.12752
YBR276C	PPS1	852579	2	Protein phosphatase with specificity for serine, threonine, and tyrosine residues; has a role in the DNA synthesis phase of the cell cycle			-0.132661	1.1284		0.152131	0.209007			0.236794	-0.002344		0.35157	-0.356475	1.1284
YBR278W	DPB3	852580	2	Third-largest subunit of DNA polymerase II (DNA polymerase epsilon), required to maintain fidelity of chromosomal replication and also for inheritance of telomeric silencing; mRNA abundance peaks at the G1/S boundary of the cell cycle	DNA polymerase epsilon complex		0.037461	0.652648	-0.006289	0.158134	0.092856	-0.361015		0.111196	-0.050322		0.215197	0.219409	0.652648
YBR279W	PAF1	852582	2	Component of the Paf1p complex that binds to and modulates the activity of RNA polymerases I and II; required for expression of a subset of genes, including cell cycle-regulated genes; homolog of human PD2/hPAF1	Cdc73p/Paf1p complex	0.0515743	-0.103661	0.303235	0.123636	-0.214622	-0.180449	-0.216331	-0.165827	0.0669149	-0.112388	0.188934	-0.046526	0.0002535	0.303235
YBR280C	SAF1	852583	2	F-Box protein involved in proteasome-dependent degradation of Aah1p during entry of cells into quiescence; interacts with Skp1		-0.276925	0.559087	1.2327	-0.062937	0.384257	0.154693			-0.217144		-0.246871		-0.253809	1.2327
YBR281C	DUG2	852584	2	Probable di- and tri-peptidase; forms a complex with Dug1p and Dug3p to degrade glutathione (GSH) and other peptides containing a gamma-glu-X bond in an alternative pathway to GSH degradation by gamma-glutamyl transpeptidase (Ecm38p)	GSH degradosomal complex	0.245377	-0.004218	1.10011	0.119676	0.259896	-0.164993	0.0788602	0.0076705	0.0457659	0.002314	0.179985	0.200469	-0.210444	1.10011
YBR282W	MRPL27	852585	2	Mitochondrial ribosomal protein of the large subunit	mitochondrial ribosomal large subunit	0.0134538	0.158394	0.24924	0.095736	-0.132708	0.424231	-0.11657	0.874706	-0.397493	0.31261	-0.014825	0.63137	-0.0623575	0.24924
YBR283C	SSH1	852586	2	Subunit of the Ssh1 translocon complex; Sec61p homolog involved in co-translational pathway of protein translocation; not essential	Ssh1p translocon complex	0.199487	-0.052959	0.852314	-0.106667	-0.107867	-0.093572	0.122883	-0.0904885	-0.0962877	0.244076	0.039446	-0.139759	0.0344895	0.852314
YBR286W	APE3	852589	2	Vacuolar aminopeptidase Y, processed to mature form by Prb1p		0.0221505	-0.223116	1.02842	-0.278381	-0.143599	-0.246076	-0.174312	0.173956	-0.248005	0.063383	0.283801	0.121015	-0.478181	1.02842
YBR288C	APM3	852591	2	Mu3-like subunit of the clathrin associated protein complex (AP-3); functions in transport of alkaline phosphatase to the vacuole via the alternate pathway	AP-3 adaptor complex	0.0158523	-0.149433	0.674342	0.235748	0.0932544	-0.023337	0.155995	-0.211385	-0.022095	0.036261	0.008532	-0.147731	-0.0452965	0.674342
YBR289W	SNF5	852592	2	Subunit of the SWI/SNF chromatin remodeling complex involved in transcriptional regulation; functions interdependently in transcriptional activation with Snf2p and Snf6p	SWI/SNF complex	-0.077876	0.023533	0.892994	0.045657	-0.391199	-0.179452	0.0609236	-0.0690015	-0.694553	0.067182	-0.095001	0.165801	0.352354	0.892994
YBR291C	CTP1	852594	2	Mitochondrial inner membrane citrate transporter, member of the mitochondrial carrier family		0.0769793	0.077022	0.672466	0.19091	0.0441236		1.94329	0.0345115	0.755618	-0.102081	0.027627	-0.152083	-0.16142	0.672466
YBR292C	YBR292C	852595	2	Dubious open reading frame unlikely to encode a protein, based on available experimental and comparative sequence data; YBR292C is not an essential gene		0.250504		0.092735	0.111749					0.173644			1.03162		0.092735
YBR302C	COS2	852605	2	Protein of unknown function, member of the DUP380 subfamily of conserved, often subtelomerically-encoded proteins		-0.190788			0.120343	1.48168	0.39331	0.41506	0.183419	0.266988		0.806024
YCL001W	RER1	850354	3	Protein involved in retention of membrane proteins, including Sec12p, in the ER; localized to Golgi; functions as a retrieval receptor in returning membrane proteins to the ER		0.0016284	-0.098058	-0.111851	0.05537		0.320953	0.185124	-0.225517	0.172762	0.126963	0.214936	-0.101332	0.110523
YCL009C	ILV6	850348	3	Regulatory subunit of acetolactate synthase, which catalyzes the first step of branched-chain amino acid biosynthesis; enhances activity of the Ilv2p catalytic subunit, localizes to mitochondria	acetolactate synthase complex	0.342054	0.209537	0.131812	0.345093	-0.268463	0.030124	-0.318815	0.695236	-0.189769	-0.320707	0.581595	-0.296995	-0.185932
YCL010C	SGF29	850347	3	Probable subunit of SAGA histone acetyltransferase complex	SAGA complex	-0.0139294	0.13684	-0.0911071	-0.020834	-0.0685018	-0.114531	-0.18187	-0.231631	-0.0947181	-0.263259	-0.289003	-0.174472	0.0980965
YCL011C	GBP2	850346	3	Poly(A+) RNA-binding protein, involved in the export of mRNAs from the nucleus to the cytoplasm; similar to Hrb1p and Npl3p; also binds single-stranded telomeric repeat sequence in vitro		0.0690343	0.099089	0.181569	0.183154	-0.153996	0.070844	0.189657	0.198615	0.265407	0.102571	0.31322	0.0775076	0.283866
YCL014W	BUD3	850345	3	Protein involved in bud-site selection and required for axial budding pattern; localizes with septins to bud neck in mitosis and may constitute an axial landmark for next round of budding		-0.0022408	-0.096277	-0.0249945	-0.163791	0.164328	-0.103206	0.119261	0.0112265	0.0820099	-0.092271	0.025158	0.018408	-0.0636835
YCL016C	DCC1	850344	3	Subunit of a complex with Ctf8p and Ctf18p that shares some components with Replication Factor C, required for sister chromatid cohesion and telomere length maintenance	DNA replication factor C complex (Ctf18p/Ctf8p/dcc1p)		-0.056648	-0.166011	0.214804		-0.207775		-0.361232	-0.582137	0.068978		-0.176764	0.26125
YCL017C	NFS1	850343	3	Cysteine desulfurase involved in iron-sulfur cluster (Fe/S) biogenesis and in thio-modification of mitochondrial and cytoplasmic tRNAs; essential protein located predominantly in mitochondria	Nfs1p/Isd11p complex	-0.0612378	-0.019102	-0.1968	0.33953	-0.11637	0.177504	0.0553734	-0.0621625	-0.183679	0.016205	-0.105907	0.109901	-0.0427395
YCL018W	LEU2	850342	3	Beta-isopropylmalate dehydrogenase (IMDH), catalyzes the third step in the leucine biosynthesis pathway		0.368132	0.338409	-0.53879	-0.274233	-0.195408	0.526779	-0.239982	-0.0729555	0.586297	0.150733	-0.374245	-0.507302	-1.10328
YCL024W	KCC4	850334	3	Protein kinase of the bud neck involved in the septin checkpoint, associates with septin proteins, negatively regulates Swe1p by phosphorylation, shows structural homology to bud neck kinases Gin4p and Hsl1p		-0.108832	-0.103965	-0.0158495	-0.34067	-0.468207	0.116964	-0.126934	0.105972	-0.425242	-0.096736	-0.018281	0.303615	0.0722305
YCL025C	AGP1	850333	3	Low-affinity amino acid permease with broad substrate range, involved in uptake of asparagine, glutamine, and other amino acids; expression is regulated by the SPS plasma membrane amino acid sensor system (Ssy1p-Ptr3p-Ssy5p)		0.264052	0.16268	0.0470665	0.892844		-0.770298	-0.473513		-0.592985	-0.276364	-0.882515	-2.44469	-1.34928
YCL026C-A	FRM2	850332	3	Protein of unknown function, involved in the integration of lipid signaling pathways with cellular homeostasis; expression induced in cells treated with the mycotoxin patulin; has similarity to bacterial nitroreductases					3.62038					1.93963
YCL026C-B	HBN1	850331	3	Putative protein of unknown function; similar to bacterial nitroreductases; green fluorescent protein (GFP)-fusion protein localizes to the cytoplasm and nucleus; protein becomes insoluble upon intracellular iron depletion		-0.288359		-0.519908	-0.819529			0.110278	-0.37227	1.84919	0.911995	0.077341	0.382343	0.585701
YCL028W	RNQ1	850329	3	[PIN(+)] prion, an infectious protein conformation that is generally an ordered protein aggregate		0.0767673	-0.07068	0.0429795	0.073729	-0.0350273	-0.103902	-0.055346	-0.154741	-0.10757	0.059366	0.09704	-0.000721	-0.139611
YCL029C	BIK1	850328	3	Microtubule-associated protein, component of the interface between microtubules and kinetochore, involved in sister chromatid separation; essential in polyploid cells but not in haploid or diploid cells; ortholog of mammalian CLIP-170		0.0526323	-0.024805	0.0207135	0.397224	0.0842005	-0.045535	0.021254	0.0225385	0.0663409	0.024254	0.022332	-0.117138	0.0088905
YCL030C	HIS4	850327	3	Multifunctional enzyme containing phosphoribosyl-ATP pyrophosphatase, phosphoribosyl-AMP cyclohydrolase, and histidinol dehydrogenase activities; catalyzes the second, third, ninth and tenth steps in histidine biosynthesis		0.316555	0.249268	-0.118535	0.711484	-0.342027	-0.292178	-0.638397	0.117234	0.0830959	-0.452004	1.19259	-1.31969	-0.550307
YCL031C	RRP7	850326	3	Essential protein involved in rRNA processing and ribosome biogenesis	UTP C complex|CURI complex	-0.0611462	0.031135	-0.12723	-0.24215	0.0543483	-0.083739	0.04279	-0.0573555	0.202242	-0.077016	-0.168824	-0.111609	-0.0414845
YCL032W	STE50	850325	3	Protein involved in mating response, invasive/filamentous growth, and osmotolerance, acts as an adaptor that links G protein-associated Cdc42p-Ste20p complex to the effector Ste11p to modulate signal transduction		0.0507063	0.096977	-0.0077445	0.148373	-0.016897	0.023059	-0.012255	0.142494	-0.125114	0.082892	0.018193	0.234501	0.236796
YCL033C	MXR2	850324	3	Methionine-R-sulfoxide reductase, involved in the response to oxidative stress; protects iron-sulfur clusters from oxidative inactivation along with MXR1; involved in the regulation of lifespan		-0.0357951		0.361487	-0.116618	0.132289	0.448675	0.0542262		0.3523	0.180207		0.750134	0.451078
YCL034W	LSB5	850323	3	Protein of unknown function; binds Las17p, which is a homolog of human Wiskott-Aldrich Syndrome protein involved in actin patch assembly and actin polymerization; may mediate disassembly of the Pan1 complex from the endocytic coat		0.247427	-1.82932	0.0578265	0.394969	-0.303606	-0.129788	-0.130396		-0.353706	0.030629	0.063161	0.049284	0.0098545
YCL035C	GRX1	850322	3	Hydroperoxide and superoxide-radical responsive heat-stable glutathione-dependent disulfide oxidoreductase with active site cysteine pair; protects cells from oxidative damage		-0.141482	0.1618	0.0677095	-0.769394	0.61891	0.817829	0.182854	-0.247612	1.19829	0.722566	-0.123328	0.192911	-0.231521
YCL036W	GFD2	850321	3	Protein of unknown function, identified as a high-copy suppressor of a dbp5 mutation		0.231424	0.903386		-1.29392		-2.53061	0.564723		0.385402				-0.523868
YCL037C	SRO9	850320	3	Cytoplasmic RNA-binding protein that associates with translating ribosomes; involved in heme regulation of Hap1p as a component of the HMC complex, also involved in the organization of actin filaments; contains a La motif	HMC Complex	0.0447753	-0.060351	-0.0738469	-0.180578	-0.265472	-0.316867	0.024726	-0.0632125	0.0652929	-0.245639	-0.270636	-0.422052	-0.127024
YCL039W	GID7	850318	3	Protein of unknown function, involved in proteasome-dependent catabolite inactivation of fructose-1,6-bisphosphatase; contains six WD40 repeats; computational analysis suggests that Gid7p and Moh1p have similar functions	FBP degradation complex	-0.18612	0.07169	0.1207	-0.08396	0.579363	-0.025226	-0.054268	-0.296624	-0.0209494	0.053595	-0.034906	0.345176	-0.0369555
YCL040W	GLK1	850317	3	Glucokinase, catalyzes the phosphorylation of glucose at C6 in the first irreversible step of glucose metabolism; one of three glucose phosphorylating enzymes; expression regulated by non-fermentable carbon sources		-0.658143	1.07229	-0.297759	-0.463482	0.813545	0.921579	0.395714	-0.936218	0.737642	1.15257	-0.702424	0.487344	-0.752719
YCL043C	PDI1	850314	3	Protein disulfide isomerase, multifunctional protein resident in the endoplasmic reticulum lumen, essential for the formation of disulfide bonds in secretory and cell-surface proteins, unscrambles non-native disulfide bonds		-0.217926	-0.023692	0.0569335	-0.292805	0.268219	0.222135	0.294303	-0.0968165	0.511766	0.126889	-0.083998	-0.1777	-0.0974535
YCL044C	MGR1	850313	3	Subunit of the mitochondrial (mt) i-AAA protease supercomplex, which degrades misfolded mitochondrial proteins; forms a subcomplex with Mgr3p that binds to substrates to facilitate proteolysis; required for growth of cells lacking mtDNA	i-AAA complex	0.0464713	0.013437	0.0928615	0.067062	0.14859	0.155407	-0.021638	0.0162965	-0.19927	0.529037	-0.010552	0.289663	-0.167953
YCL045C	EMC1	850312	3	Member of a transmembrane complex required for efficient folding of proteins in the ER; null mutant displays induction of the unfolded protein response; interacts with Gal80p		-0.0523765	-0.159488	-0.0382225	-0.040954	0.173169	-0.026728	0.284243	-0.0393555	-0.0902656	-0.078767	0.253939	-0.111675	-0.0037735
YCL047C	YCL047C	850310	3	Putative protein of unknown function		-0.0730991	-0.156325	0.0046435	-0.080735	0.0074141	0.264376	0.152193	0.0302665	0.241834	0.079672	-0.53266	-0.359146	0.0501945
YCL050C	APA1	850307	3	Diadenosine 5',5''-P1,P4-tetraphosphate phosphorylase I (AP4A phosphorylase), involved in catabolism of bis(5'-nucleosidyl) tetraphosphates; has similarity to Apa2p		0.118016	-0.513695	-0.246057	-0.427071	-0.196296	-0.169559	-0.213272	-0.126159	0.587027	-0.450958	-0.001623	-0.274178	-0.333315
YCL051W	LRE1	850306	3	Protein involved in control of cell wall structure and stress response; inhibits Cbk1p protein kinase activity; overproduction confers resistance to cell-wall degrading enzymes		0.0022878	0.153645	0.100494		-0.37462		-0.423965		0.27489	0.118533	-0.470235
YCL052C	PBN1	850305	3	Essential component of glycosylphosphatidylinositol-mannosyltransferase I, required for the autocatalytic post-translational processing of the protease B precursor Prb1p, localizes to ER in lumenal orientation; homolog of mammalian PIG-X		-0.0934008	-0.049698	0.0309175	0.137305	0.180338	-2.5643	0.152506	0.0126585	0.262012	0.006995	0.037055	0.348956	0.140928
YCL054W	SPB1	850304	3	AdoMet-dependent methyltransferase involved in rRNA processing and 60S ribosomal subunit maturation; methylates G2922 in the tRNA docking site of the large subunit rRNA and in the absence of snR52, U2921; suppressor of PAB1 mutants		0.006172	-0.158487	0.0265285	-0.116505	0.0574704	-0.065267	-0.067288	0.146231	0.294044	0.066075	-0.103005	-0.525932	0.0805335
YCL057C-A	YCL057C-A	850300	3	Putative protein of unknown function; the authentic, non-tagged protein is detected in highly purified mitochondria in high-throughput studies			0.88152						0.507634
YCL057W	PRD1	850301	3	Zinc metalloendopeptidase, found in the cytoplasm and intermembrane space of mitochondria; with Cym1p, involved in degradation of mitochondrial proteins and of presequence peptides cleaved from imported proteins		-0.0663726	-0.141533	0.146	-0.270165	0.134696	0.077648	0.210675	0.137177	0.0493219	0.059329	0.599676	0.167663	-0.0190335
YCL059C	KRR1	850298	3	Essential nucleolar protein required for the synthesis of 18S rRNA and for the assembly of 40S ribosomal subunit		0.0523713	-0.078332	-0.12354	0.020278	0.130964	-0.117428	0.018548	0.0332895	0.0564229	0.014209	-0.004298	-0.330794	0.0231135
YCL061C	MRC1	850297	3	S-phase checkpoint protein required for DNA replication; interacts with and stabilizes Pol2p at stalled replication forks during stress, where it forms a pausing complex with Tof1p and is phosphorylated by Mec1p; protects uncapped telomeres	Tof1p/Mrc1p/Csm3p complex	-0.0696883	-0.06987	-0.153151	-0.29055	-0.0731018	-0.007136	-0.174528	-0.280991	-0.239304	-0.118052	0.037884	0.0728078	0.0975945
YCL064C	CHA1	850295	3	Catabolic L-serine (L-threonine) deaminase, catalyzes the degradation of both L-serine and L-threonine; required to use serine or threonine as the sole nitrogen source, transcriptionally induced by serine and threonine				-1.59322	0.639143		0.010833	0.258419		1.55293		2.77886
YCR002C	CDC10	850358	3	Component of the septin ring of the mother-bud neck that is required for cytokinesis; septins recruit proteins to the neck and can act as a barrier to diffusion at the membrane, and they comprise the 10nm filaments seen with EM		0.0440733	-0.060888	-0.0684004	0.180142	-0.0917288	0.011293	-0.078273	-0.29698	-0.0126085	-0.157201	-0.025889	-0.028164	-0.0049105
YCR003W	MRPL32	850359	3	Mitochondrial ribosomal protein of the large subunit	mitochondrial ribosomal large subunit		0.033942	0.0340695		-0.389155	0.374536		0.0260385	-0.698461			1.36211	0.157507
YCR004C	YCP4	850360	3	Protein of unknown function, has sequence and structural similarity to flavodoxins; predicted to be palmitoylated; the authentic, non-tagged protein is detected in highly purified mitochondria in high-throughput studies		-0.0665716	-0.089559	0.0851915	-0.095238	-0.309887	-0.047232	-0.12777	0.107038	-0.119404	-0.10523	0.450373	0.274366	-0.0918945
YCR005C	CIT2	850361	3	Citrate synthase, catalyzes the condensation of acetyl coenzyme A and oxaloacetate to form citrate, peroxisomal isozyme involved in glyoxylate cycle; expression is controlled by Rtg1p and Rtg2p transcription factors		0.0039023	-0.000391	0.25647	0.216765	0.464345	0.013576	0.404193	-0.472209	-0.350141	-0.233997	-1.7124	-0.253023	-0.3162
YCR008W	SAT4	850366	3	Ser/Thr protein kinase involved in salt tolerance; funtions in regulation of Trk1p-Trk2p potassium transporter; partially redundant with Hal5p; has similarity to Npr1p		0.0344154	-0.095998	-0.13149	-0.096415	0.05063	0.06015	0.026619	-0.0473355	-0.409084	0.198554	-0.219203	-0.12201	-0.0854065
YCR009C	RVS161	850367	3	Amphiphysin-like lipid raft protein; interacts with Rvs167p and regulates polarization of the actin cytoskeleton, endocytosis, cell polarity, cell fusion and viability following starvation or osmotic stress	Rvs161p/Rvs167p complex	-0.069004	0.010489	-0.122503	0.002867	-0.0281403	0.005616	-0.003376	-0.333005	-0.0040423	0.031614	0.003486	0.136891	0.236292
YCR011C	ADP1	850369	3	Putative ATP-dependent permease of the ABC transporter family of proteins		0.0278886	0.034302	-0.0874207	-0.044884	-0.0961248	-0.096707	-0.159089	-0.356002	-0.248783	0.111096	0.059053	-0.194289	-0.12294
YCR012W	PGK1	850370	3	3-phosphoglycerate kinase, catalyzes transfer of high-energy phosphoryl groups from the acyl phosphate of 1,3-bisphosphoglycerate to ADP to produce ATP; key enzyme in glycolysis and gluconeogenesis		-0.0718021	-0.13008	-0.247696	-0.377762	0.226636	0.097976	-0.020882	-0.259681	0.108405	-0.060142	-0.101466	-0.283638	-0.272921
YCR015C	YCR015C	850373	3	Putative protein of unknown function; YCR015C is not an essential gene		-0.0489979	-0.289905	-0.20415	-0.129324	0.229919	0.169587	-0.30315		-0.0097154	-0.165556	-0.168718	-0.178466	-0.190624
YCR016W	YCR016W	850375	3	Putative protein of unknown function; green fluorescent protein (GFP)-fusion protein localizes to the nucleolus and nucleus; predicted to be involved in ribosome biogenesis		0.0317645	-0.134606	-0.0986186	-0.01443	0.1035	-0.031829	-0.050319	0.17115	0.131751	0.0845558	0.054889	-0.217558	0.0121685
YCR017C	CWH43	850376	3	Putative sensor/transporter protein involved in cell wall biogenesis; contains 14-16 transmembrane segments and several putative glycosylation and phosphorylation sites; null mutation is synthetically lethal with pkc1 deletion		-0.0991954	-0.165195	-0.215665	0.058602	-0.0948338	-0.0794	0.164793	-0.227645	0.0979219	-0.218528	-0.000174	-0.006001	-0.0628195
YCR024C	SLM5	850388	3	Mitochondrial asparaginyl-tRNA synthetase		-0.238382	0.209777	0.141643	0.194307	0.311163	0.408709	0.227253	0.319551	0.429646	0.161248	0.034675	0.733399	0.25218
YCR026C	NPP1	850391	3	Nucleotide pyrophosphatase/phosphodiesterase family member; mediates extracellular nucleotide phosphate hydrolysis along with Npp2p and Pho5p; activity and expression enhanced during conditions of phosphate starvation		-0.328171	-0.238952	0.0548855	0.114048	-0.0211614	0.276834	0.241094	-0.196134	0.161702	-0.167731	0.059794	0.0589	0.0776845
YCR027C	RHB1	850392	3	Putative Rheb-related GTPase involved in regulating canavanine resistance and arginine uptake; member of the Ras superfamily of G-proteins		-0.0939261		0.243827	0.195126			-0.26528	-0.500612	-0.47212	0.253766		0.0951965	-0.0901225
YCR028C-A	RIM1	850395	3	Single-stranded DNA-binding protein essential for mitochondrial genome maintenance; involved in mitochondrial DNA replication		-0.0026163	-0.161272	0.0376405	-0.036191	-0.0469812	0.002131	-0.156507	0.0126115	-0.209223	-0.2677	-0.097171	0.140859	0.150021
YCR030C	SYP1	850396	3	Protein of unknown function that is involved in endocytic site formation; may regulate assembly and disassembly of the septin ring; colocalizes and interacts with septin subunits; potential role in actin cytoskeletal organization		-0.0782592	-0.005283	-0.0464315	-0.060354	-0.105988	0.084013	-0.171255	-0.173367	-0.0503867	0.188913	0.114691	0.164198	0.123901
YCR031C	RPS14A	850397	3	Ribosomal protein 59 of the small subunit, required for ribosome assembly and 20S pre-rRNA processing; mutations confer cryptopleurine resistance; nearly identical to Rps14Bp and similar to E. coli S11 and rat S14 ribosomal proteins	cytoplasmic ribosomal small subunit	0.0012653	-0.074079	-0.01178	-0.299298	0.0131896	-0.0637965	0.0987278	0.187045	0.027717	-0.126859	-0.185439	-0.324296	-0.119878
YCR032W	BPH1	850398	3	PProtein homologous to human Chediak-Higashi syndrome and murine Beige proteins, which are implicated in disease syndromes due to defective lysosomal trafficking; mutant phenotype and genetic interactions suggest a role in protein sorting				0.130501	0.069583	-0.129626	-0.241938	0.164121	-1.51591	0.194729	-1.21744			0.0489915
YCR033W	SNT1	850399	3	Subunit of the Set3C deacetylase complex that interacts directly with the Set3C subunit, Sif2p; putative DNA-binding protein; mutant has increased aneuploidy tolerance	Set3p complex	0.0729363	0.054706	-0.0393455	0.125775	-0.262993	-0.063675	-0.070881	-0.468357	-0.145846	0.030994	-0.094656	-0.100293	0.0459145
YCR035C	RRP43	850401	3	Exosome non-catalytic core component; involved in 3'-5' RNA processing and degradation in both the nucleus and the cytoplasm; has similarity to E. coli RNase PH and to human hRrp43p (OIP2, EXOSC8)	Nuclear exosome complex|Cytoplasmic exosome complex	0.0639673	0.052373	-0.0301775	0.233611	0.0056503	-0.028844	-0.031723	-0.0313355	0.0251307	0.017145	-0.189725	-0.188789	-0.0831385
YCR036W	RBK1	850402	3	Putative ribokinase		-0.0563947	0.116835	0.261062	0.05011	-0.0578538	0.107929	0.157208	0.197957	0.308522	-0.099928	0.03507	0.609574	0.181497
YCR037C	PHO87	850403	3	Low-affinity inorganic phosphate (Pi) transporter, involved in activation of PHO pathway; expression is independent of Pi concentration and Pho4p activity; contains 12 membrane-spanning segments		-0.375506	-0.348203	0.666339	1.0327			0.888305		0.217463	1.64885	3.36785	0.463948	1.73825
YCR042C	TAF2	850409	3	TFIID subunit (150 kDa), involved in RNA polymerase II transcription initiation	transcription factor TFIID complex	-0.0935355	0.004142	-0.10149	0.063761		-0.19992	-0.137987	-0.0914555	-0.0143266	-0.041375	-0.284357	0.004284	0.0231475
YCR043C	YCR043C	850410	3	Putative protein of unknown function; green fluorescent protein (GFP)-fusion protein localizes to the Golgi apparatus; YCR043C is not an essential gene		-0.0970463	0.067976	-1.62005	-0.073999	0.43352	-0.445023	0.0823709	0.158691	-0.100767	-0.656448	-0.440728	-0.26267	-0.0498165
YCR046C	IMG1	850413	3	Mitochondrial ribosomal protein of the large subunit, required for respiration and for maintenance of the mitochondrial genome	mitochondrial ribosomal large subunit	0.0466443	0.276795	0.222712	0.294184	0.171641	0.341438		1.04357	-0.561944	0.270162	0.025778	0.64261	-0.156678
YCR047C	BUD23	850414	3	Methyltransferase, methylates residue G1575 of 18S rRNA; required for rRNA processing and nuclear export of 40S ribosomal subunits independently of methylation activity; diploid mutant displays random budding pattern		-0.04678	0.064242	-0.0644052	0.228736	-0.107133	-0.094003	0.192454	-0.0086855	-0.0672926	-0.056423	-0.066485	-0.433385	-0.0399665
YCR048W	ARE1	850415	3	Acyl-CoA:sterol acyltransferase, isozyme of Are2p; endoplasmic reticulum enzyme that contributes the major sterol esterification activity in the absence of oxygen		-0.0734182		-2.26883	0.315581		-0.159525	2.79219		-0.133729	-0.223632	0.119816	-0.374802	-0.0337445
YCR051W	YCR051W	850418	3	Putative protein of unknown function; green fluorescent protein (GFP)-fusion protein localizes to the cytoplasm and nucleus; contains ankyrin (Ank) repeats; YCR051W is not an essential gene		0.0801773	-0.051086	0.15229	-0.307278	0.207814	0.370722	0.214368	0.140749	0.163584	0.293831	0.219926	0.041925	-0.0091915
YCR052W	RSC6	850419	3	Component of the RSC chromatin remodeling complex; essential for mitotic growth; homolog of SWI/SNF subunit Swp73p	RSC complex	0.0739273	0.054047	0.103061	0.066153	-0.176485	-0.031436	-0.029605	-0.157026	-0.158965	-0.025544	0.03152	-0.154542	0.183193
YCR053W	THR4	850420	3	Threonine synthase, conserved protein that catalyzes formation of threonine from O-phosphohomoserine; expression is regulated by the GCN4-mediated general amino acid control pathway		0.19395	0.048468	-0.0812554	-0.199831	-0.103062	-0.069971	-0.388883	0.136643	0.741298	-0.262405	0.329144	-0.218396	-0.328107
YCR054C	CTR86	850421	3	Essential protein of unknown function; upstream region contains a Gcn4p responsive site suggesting a possible role in amino acid biosynthesis		0.379783	0.109248	0.0880345	0.122977	0.272844	-0.051322	0.0875967	0.208091	-0.0227088	0.250557	0.019565	0.167227	0.0745445
YCR057C	PWP2	850422	3	Conserved 90S pre-ribosomal component essential for proper endonucleolytic cleavage of the 35 S rRNA precursor at A0, A1, and A2 sites; contains eight WD-repeats; PWP2 deletion leads to defects in cell cycle and bud morphogenesis	UTP B complex	-0.0033711	0.050233	-0.0503725	0.038656	0.0972006	-0.011573	0.278939	-0.0782925	0.193481	0.065019	-0.09939	-0.348345	0.0042665
YCR060W	TAH1	850424	3	HSP90 cofactor; interacts with Hsp82p, Pih1p, Rvb1 and Rvb2, contains a single TPR domain with at least two TPR motifs		-0.18802	-0.318405	-0.111083	0.104424	1.17857	0.223039	0.316614	0.627876	0.665491	-0.218278	-0.847616	-0.039444	-0.494407
YCR063W	BUD31	850427	3	Component of the SF3b subcomplex of the U2 snRNP; diploid mutants display a random budding pattern instead of the wild-type bipolar pattern		0.0828173		0.148274			0.642694	0.362723	0.157918	-0.190724	-0.372355		0.0795316	0.285412
YCR066W	RAD18	850430	3	E3 ubiqutin ligase, forms heterodimer with Rad6p to monoubiquitinate PCNA-K164; heterodimer binds single-stranded DNA and has single-stranded DNA dependent ATPase activity; required for postreplication repair	Rad6p/Rad18p complex	0.207838		0.270684	-0.04406	-0.328742	-0.093998	-0.154533	0.0176915	-0.109701	-0.072582		0.129366	0.0296875
YCR067C	SED4	850431	3	Integral endoplasmic reticulum membrane protein, functions as a positive regulator of Sar1p probably through inhibition of GTPase activation by Sec23p; binds Sec16p, participates in vesicle formation, similar to Sec12p		0.101939		0.146081	-0.22701	0.139443	-0.028612		0.124422	0.154941	-0.23795	-0.10177	0.0877199	0.115993
YCR068W	ATG15	850432	3	Lipase required for intravacuolar lysis of autophagic bodies and Cvt bodies; targeted to intravacuolar vesicles during autophagy via the multivesicular body (MVB) pathway		-0.228628			0.14035		0.500433			0.430133				-0.149544
YCR069W	CPR4	850433	3	Peptidyl-prolyl cis-trans isomerase (cyclophilin), catalyzes the cis-trans isomerization of peptide bonds N-terminal to proline residues; has a potential role in the secretory pathway		-0.692405	-0.364241	-0.145257	0.190111		0.354591			-0.340147			-0.471275	0.261991
YCR071C	IMG2	850434	3	Mitochondrial ribosomal protein of the large subunit	mitochondrial ribosomal large subunit	0.0052696	0.135533	0.250843	0.11138	0.13006	0.291869	-0.128497	0.874706	-0.473753	0.549987	0.093105	0.609464	-0.140096
YCR072C	RSA4	850435	3	WD-repeat protein involved in ribosome biogenesis; may interact with ribosomes; required for maturation and efficient intra-nuclear transport or pre-60S ribosomal subunits, localizes to the nucleolus		-0.017224	-0.044743	0.148126	0.036876	0.115011	-0.094803	0.106222	0.0130515	0.287499	0.100046	-0.151996	-0.333969	0.0187735
YCR073W-A	SOL2	850437	3	Protein with a possible role in tRNA export; shows similarity to 6-phosphogluconolactonase non-catalytic domains but does not exhibit this enzymatic activity; homologous to Sol1p, Sol3p, and Sol4p		0.0773933	0.007351	0.145056	0.360704	-0.120985	-0.062686	-0.183837	-0.114931	-0.107846	0.283621	-0.215202	0.318537	-0.250394
YCR075W-A	YCR075W-A	1466399	3	Putative protein of unknown function; identified by homology to Ashbya gossypii			0.042075	0.16781		-0.0174797	0.054032		-0.0498725	-0.206855	-0.078164	0.435237	0.608955	-0.14093
YCR076C	YCR076C	850439	3	Putative protein of unknown function; YCR076C is not an essential gene		0.106259	-0.065366	-0.154585		-0.353957	-0.135812	-0.327981	-0.161586	0.0147166	-0.167954	0.553886	0.193416	-0.0645515
YCR077C	PAT1	850440	3	Topoisomerase II-associated deadenylation-dependent mRNA-decapping factor; also required for faithful chromosome transmission, maintenance of rDNA locus stability, and protection of mRNA 3'-UTRs from trimming; functionally linked to Pab1p		0.004174	-0.049479	0.0659525	-0.074205	-0.250096	0.052415	-0.004943	-0.130362	-0.108603	0.039034	0.069553	-0.156191	0.193703
YCR083W	TRX3	850444	3	Mitochondrial thioredoxin, highly conserved oxidoreductase required to maintain the redox homeostasis of the cell, forms the mitochondrial thioredoxin system with Trr2p, redox state is maintained by both Trr2p and Glr1p		-0.233494	0.400303	0.0914305	-0.186867	0.711075	0.968979	0.5343	0.325568	0.513889	0.91422	0.349986	0.818738	-0.0201775
YCR084C	TUP1	850445	3	General repressor of transcription, forms complex with Cyc8p, involved in the establishment of repressive chromatin structure through interactions with histones H3 and H4, appears to enhance expression of some genes	Sko1p/Cyc8p/Tup1 repressor complex|Tup1p/Ssn6p complex	0.0143053	0.126886	0.0987565	0.031506	-0.319068	-0.136288	-0.065863	-0.0116445	-0.102516	0.100798	0.158422	-0.021626	-0.0080275
YCR086W	CSM1	850447	3	Nucleolar protein that forms a complex with Lrs4p and then Mam1p at kinetochores during meiosis I to mediate accurate homolog segregation; required for condensin recruitment to the replication fork barrier site and rDNA repeat segregation	Csm1p/Lrs4p complex|monopolin complex	-0.0281648	0.011341	0.216506	0.172741	-0.0895258	-0.167307	0.046459	0.161902	0.0995609	-0.153454	-0.001657	0.235114	0.0287195
YCR087C-A	YCR087C-A	850449	3	Putative protein of unknown function; green fluorescent protein (GFP)-fusion protein localizes to the nucleolus; YCR087C-A is not an essential gene		0.0885633	0.136115	0.0437305	-0.0824	-0.0549278	0.013938	0.198896	0.278458	-0.126897	0.144056	-0.298133	-0.131684	0.0372985
YCR088W	ABP1	850450	3	Actin-binding protein of the cortical actin cytoskeleton, important for activation of the Arp2/3 complex that plays a key role actin in cytoskeleton organization		-0.0757605	-0.075951	-0.0235025	0.137155	-0.15513	-0.079661	-0.27507	-0.285904	-0.0273672	-0.263651	0.394101	0.045157	-0.0402695
YCR090C	YCR090C	850452	3	Putative protein of unknown function; green fluorescent protein (GFP)-fusion protein localizes to the cytoplasm and nucleus; YCR090C is not an essential gene		0.03521	0.067071	-0.108194	-0.067536	0.334401	0.336111	-0.001363	0.174517	0.249533	-0.044242	-0.096889	-0.057625	-0.30239
YCR091W	KIN82	850453	3	Putative serine/threonine protein kinase implicated in the regulation of phospholipid asymmetry through the activation of phospholipid translocases (flippases) Lem3p-Dnf1p/Dnf2p; similar to Fpk1p		0.0482071	-0.010466	-0.107868	-0.460258	-0.0315646	-0.0927215	-0.198927	-0.209769	-0.194863	-0.088719	0.751574	0.32741	0.0507475
YCR092C	MSH3	850454	3	Mismatch repair protein, forms dimers with Msh2p that mediate repair of insertion or deletion mutations and removal of nonhomologous DNA ends, contains a PCNA (Pol30p) binding motif required for genome stability	MSH2p/MSH3p complex	0.0083446	-0.087448	-0.0781734		0.318403	0.255265	0.693577	-0.241146	0.394434	-0.107591	-0.113046	0.017306
YCR093W	CDC39	850455	3	Component of the CCR4-NOT complex, which has multiple roles in regulating mRNA levels including regulation of transcription and destabilizing mRNAs by deadenylation; basal transcription factor	CCR4-NOT core complex	-0.0048501	-0.02262	0.0461665	0.038505	-0.0471961	0.013215	0.0903973	-0.113967	0.192659	0.075404	-0.158229	-0.049744	0.0648565
YCR094W	CDC50	850456	3	Endosomal protein that interacts with phospholipid flippase Drs2p; interaction with Cdc50p is essential for Drs2p catalytic activity; mutations affect cell polarity and polarized growth; similar to Ynr048wp and Lem3p		-0.267647		-0.255312	0.303761	-0.224195				0.147956	-0.335306		0.007087	0.298074
YCR095C	OCA4	850457	3	Cytoplasmic protein required for replication of Brome mosaic virus in S. cerevisiae, which is a model system for studying replication of positive-strand RNA viruses in their natural hosts	OCA complex	0.415807		0.135126	-0.278179	0.122261	0.242714	-0.156887	-0.349326	0.0543239	0.014894		-0.11007
YCR100C	YCR100C	850464	3	Putative protein of unknown function			1.05719	0.224631	-1.04275	1.61148	1.00431	0.440634	1.17431	1.55923	-0.765958	0.0821	0.740455	0.728164
YCR102C	YCR102C	850466	3	Putative protein of unknown function, involved in copper metabolism; similar to C. carbonum toxD gene; member of the quinone oxidoreductase family		-0.628623	1.37725	0.39896	-0.805898	1.3552	1.36967	1.17053	0.848948	1.37918	2.14112	1.44703	-0.601573	-1.02251
YDL001W	RMD1	851563	4	Cytoplasmic protein required for sporulation		0.114053	0.076165	0.0174515	-0.062839		0.051239	0.117647	-0.165917		0.314619	-0.573552	-0.013445	-0.349384
YDL002C	NHP10	851562	4	Protein related to mammalian high mobility group proteins; preferentially binds DNA ends, protecting them from exonucleatic cleavage; likely component of the chromatin-remodeling complex INO80 complex; proposed to be involved in DNA repair	Ino80p complex	0.124608	-0.087846	-0.0051465	-0.033519	-0.122495	-0.097736	-0.116125	-0.19175	0.0740489	-0.030326	0.164184	-0.127734	0.374511
YDL003W	MCD1	851561	4	Essential subunit of the cohesin complex required for sister chromatid cohesion in mitosis and meiosis; apoptosis induces cleavage and translocation of a C-terminal fragment to mitochondria; expression peaks in S phase	nuclear cohesin complex	-0.105091	0.171025	-0.0349125	-0.36871	-0.0202071	0.013857	0.129385	-0.141515	0.0333537	-0.085915	-0.089174	-0.247883	-0.0179825
YDL004W	ATP16	851560	4	Delta subunit of the central stalk of mitochondrial F1F0 ATP synthase, which is a large, evolutionarily conserved enzyme complex required for ATP synthesis; phosphorylated	F0/F1 ATP synthase (complex V)	0.137832	0.323509	0.117518	-0.262448	-0.0856878	0.262247	0.232862	0.435897	-0.819314	0.2871	-0.288991	0.794165	-0.104503
YDL005C	MED2	851559	4	Subunit of the RNA polymerase II mediator complex; associates with core polymerase subunits to form the RNA polymerase II holoenzyme; essential for transcriptional regulation	Kornberg's mediator (SRB) complex	-0.0278667	-0.031318	0.308754	-0.127861	0.0731434	-0.049045	-0.055031	-0.616583	-0.191624	-0.031526	0.295616	-0.551121	0.160846
YDL006W	PTC1	851558	4	Type 2C protein phosphatase (PP2C); dephosphorylates Hog1p, inactivating osmosensing MAPK cascade; involved in Fus3p activation during pheromone response; deletion affects precursor tRNA splicing, mitochondrial inheritance, and sporulation		0.0207464	-0.07666	-0.283303	0.032805	-0.0267311	-0.101201	-0.038682	0.106425	0.0686619	-0.025906		0.16421	0.300372
YDL007W	RPT2	851557	4	One of six ATPases of the 19S regulatory particle of the 26S proteasome involved in the degradation of ubiquitinated substrates; required for normal peptide hydrolysis by the core 20S particle	19/22S regulator	0.0102735	-0.21713	0.152572	-0.002035	0.219391	0.044008	0.140158	-0.117744	0.29572	-0.036009	0.519522	0.0964593	0.0578135
YDL010W	GRX6	851551	4	Cis-golgi localized monothiol glutaredoxin that binds an iron-sulfur cluster; more similar in activity to dithiol than other monothiol glutaredoxins; involved in the oxidative stress response; functional overlap with GRX7		-0.0322758	-0.191753	-0.540818	0.207981	0.127286	0.154477	0.0834081	-0.308488	0.173414	-0.213579	0.304602	-0.137825	0.259666
YDL014W	NOP1	851548	4	Nucleolar protein, component of the small subunit processome complex, which is required for processing of pre-18S rRNA; has similarity to mammalian fibrillarin	box C/D snoRNP complex	-0.04858	-0.103259	0.0130175	-0.096348	-0.0884518	0.015201	0.112509	0.0278405	-0.0132835	0.029183	-0.282476	-0.264321	0.0511145
YDL015C	TSC13	851547	4	Enoyl reductase that catalyzes the last step in each cycle of very long chain fatty acid elongation, localizes to the ER, highly enriched in a structure marking nuclear-vacuolar junctions, coimmunoprecipitates with elongases Fen1p and Sur4p		-0.0043079	-0.12448	0.0336305	-0.006524	-0.051805	0.051311	0.0545289	-0.0280385	0.254292	0.233813	0.16918	-0.051409	-0.0619685
YDL017W	CDC7	851545	4	DDK (Dbf4-dependent kinase) catalytic subunit required for firing origins and replication fork progression in S phase through phosphorylation of Mcm2-7p complexes and Cdc45p; kinase activity correlates with cyclical DBF4 expression	Cdc7p/Dbf4p complex	-0.0073288	0.079068	-1.60908	0.119135	0.277961	-0.019054		-0.14003	0.139483	-0.040717	-0.707814	0.0736273	0.284556
YDL018C	ERP3	851544	4	Protein with similarity to Emp24p and Erv25p, member of the p24 family involved in ER to Golgi transport		-0.0194807	-0.216926	0.112889	-0.44246	-0.0583278	0.134108	0.146453	0.17393	-0.44587	0.282951	-0.151191	0.178127	0.0805195
YDL019C	OSH2	851543	4	Member of an oxysterol-binding protein family with seven members in S. cerevisiae; family members have overlapping, redundant functions in sterol metabolism and collectively perform a function essential for viability		-0.120925	0.085864	-0.0268315	-0.019336	0.0717322	0.071944	-0.134512	-0.247242	-0.514783	0.350794	0.281822	0.269998	0.249352
YDL021W	GPM2	851541	4	Homolog of Gpm1p phosphoglycerate mutase, which converts 3-phosphoglycerate to 2-phosphoglycerate in glycolysis; may be non-functional derivative of a gene duplication event		-0.207113	0.142069	-0.679705	-1.13949	0.560859	0.404172	0.106617	-1.16122	1.10023	0.543132	-0.967974	0.145077	-0.659706
YDL022W	GPD1	851539	4	NAD-dependent glycerol-3-phosphate dehydrogenase, key enzyme of glycerol synthesis, essential for growth under osmotic stress; expression regulated by high-osmolarity glycerol response pathway; homolog of Gpd2p		-0.285231	0.22247	-0.298714	-1.38741	-0.167775	0.06247	0.0999957	-0.960452	-0.35654	0.822731	-0.72069	-0.234076	-0.394993
YDL025C	YDL025C	851536	4	Putative protein kinase, potentially phosphorylated by Cdc28p; interacts with ribosome biogenesis factors, Cka2, Gus1 and Arc1		0.108812	0.104663	0.0201645	0.31986	-0.332526	-0.207673	-0.38524	0.27295	-0.297567	0.116267	0.764298	0.004521	-0.394373
YDL027C	YDL027C	851535	4	Putative protein of unknown function; the authentic, non-tagged protein is detected in highly purified mitochondria in high-throughput studies; YDL027C is not an essential gene		-0.180053	0.44146	-0.173982	-0.053221		0.703229	0.364271	0.0521855	0.325667	-0.914703	-0.485231	0.198725	-0.121266
YDL029W	ARP2	851532	4	Essential component of the Arp2/3 complex, which is a highly conserved actin nucleation center required for the motility and integrity of actin patches; involved in endocytosis and membrane growth and polarity	Arp2/3 protein complex	-0.0738218	0.049434	-0.0002605	0.374092	-0.0859788	0.079131	-0.090105	-0.312798	-0.223294	-0.00788	0.139528	0.119823	0.11862
YDL030W	PRP9	851531	4	Subunit of the SF3a splicing factor complex, required for spliceosome assembly; acts after the formation of the U1 snRNP-pre-mRNA complex	Prp9p/Prp11p/Prp21p complex(SF3a complex)|U2 snRNP complex	0.18477	0.242694	0.131798	0.15554	-0.0303754	0.131265	0.222219		-0.179734	-0.032574	-0.10522	0.029296	0.0703245
YDL031W	DBP10	851530	4	Putative ATP-dependent RNA helicase of the DEAD-box protein family, constituent of 66S pre-ribosomal particles; essential protein involved in ribosome biogenesis		0.0572423	0.040184	0.167173	0.023548	0.109997	-0.059447	0.171491	0.130152	-0.0113024	0.124928	0.1647	-0.34851	0.0102485
YDL035C	GPR1	851527	4	Plasma membrane G protein coupled receptor (GPCR) that interacts with the heterotrimeric G protein alpha subunit, Gpa2p, and with Plc1p; sensor that integrates nutritional signals with the modulation of cell fate via PKA and cAMP synthesis		0.170925	0.143487	-0.164355	0.092613	0.0328142	0.289602	-0.340876	0.790725	0.176626	-0.441794	-0.258265	-0.03088
YDL036C	PUS9	851525	4	Mitochondrial tRNA:pseudouridine synthase, catalyzes the formation of pseudouridine at position 32 in mitochondrial tRNAs; contains an N-terminal mitochondrial targeting sequence		-0.119999	0.040405	0.605336	0.301588		-0.282064	-0.036583		-0.206887		-0.249169	-0.139191	-0.116043
YDL040C	NAT1	851521	4	Subunit of the N-terminal acetyltransferase NatA (Nat1p, Ard1p, Nat5p); N-terminally acetylates many proteins, which influences multiple processes such as the cell cycle, heat-shock resistance, mating, sporulation, and telomeric silencing	NatA complex	0.0853213	-0.19203	0.0437005	-0.106564	0.0362236	-0.216378	-0.117886	-0.151644	-0.303576	-0.263416	-0.093121	-0.341026	0.0204615
YDL042C	SIR2	851520	4	Conserved NAD+ dependent histone deacetylase of the Sirtuin family involved in regulation of lifespan; plays roles in silencing at HML, HMR, telomeres, and the rDNA locus; negatively regulates initiation of DNA replication	chromatin silencing complex|RENT complex	-0.0803795	0.106248	-0.268146	-0.585281	0.188671	0.340442	-0.594655	-0.473963	0.0512149	-0.485316	-0.320783	-0.254637	-0.174731
YDL043C	PRP11	851518	4	Subunit of the SF3a splicing factor complex, required for spliceosome assembly	Prp9p/Prp11p/Prp21p complex(SF3a complex)|U2 snRNP complex	-0.0353421	-0.178047	-0.175506	0.013745	0.0635621	0.048416	-0.011852	0.339601	0.0527579	0.033122	-0.14627	-0.145838	0.0049125
YDL044C	MTF2	851517	4	Mitochondrial matrix protein that interacts with an N-terminal region of mitochondrial RNA polymerase (Rpo41p) and couples RNA processing and translation to transcription		0.0289164	0.164998	0.0715915	0.082344	-0.0123769	0.161189	-0.091384	0.0930155	-0.317225	0.237434	-0.199815	0.469801	0.0326085
YDL045C	FAD1	851516	4	Flavin adenine dinucleotide (FAD) synthetase, performs the second step in synthesis of FAD from riboflavin		-0.0441979	-0.048239	-0.295351	-0.139279		0.295657	0.0531786	-0.227161	0.24136	0.258286	0.201648	0.45822	0.128327
YDL046W	NPC2	851514	4	Functional homolog of human NPC2/He1, which is a cholesterol-binding protein whose deficiency causes Niemann-Pick type C2 disease involving retention of cholesterol in lysosomes		-0.0140148	0.213348	0.719515	-0.037862	0.514124		-0.252132	0.155621	0.519915	0.332621	0.528923	0.500102	-0.669622
YDL047W	SIT4	851513	4	Type 2A-related serine-threonine phosphatase that functions in the G1/S transition of the mitotic cycle; cytoplasmic and nuclear protein that modulates functions mediated by Pkc1p including cell wall and actin cytoskeleton organization	Sap190p/Sit4p complex|Sap155p/Sit4p complex|Tap42p/Sit4p/Rrd1p complex|Sap185p/Sit4p complex	-0.0502486	-0.093753	-0.115885	-0.04705	0.0720897	-0.165038	-0.036668	-0.0670545	-0.0018735	-0.073887	-0.464277	-0.213382	0.0299915
YDL051W	LHP1	851509	4	RNA binding protein required for maturation of tRNA and U6 snRNA precursors; acts as a molecular chaperone for RNAs transcribed by polymerase III; homologous to human La (SS-B) autoantigen		0.0826353	-0.196763	-0.111737	-0.226131	-0.0461201	-0.265633	-0.167957	0.154547	0.331119	-0.426579	-0.549482	-0.438094	-0.138111
YDL052C	SLC1	851508	4	1-acyl-sn-glycerol-3-phosphate acyltransferase, catalyzes the acylation of lysophosphatidic acid to form phosphatidic acid, a key intermediate in lipid metabolism; enzymatic activity detected in lipid particles and microsomes		-0.0220328	-0.257743	-0.184711	0.048322	0.135918	-0.079903	0.047234	0.0027445	0.0252027	-0.09204	-0.046332	-0.358478	0.0598145
YDL053C	PBP4	851507	4	Pbp1p binding protein, interacts strongly with Pab1p-binding protein 1 (Pbp1p) in the yeast two-hybrid system; also interacts with Lsm12p in a copurification assay		0.159827	-0.175689	0.0276415	-0.021246	0.114152	-0.085374	-0.259844	0.108208	-0.256212	-0.172698	-0.015587	0.124682	0.0646185
YDL055C	PSA1	851504	4	GDP-mannose pyrophosphorylase (mannose-1-phosphate guanyltransferase), synthesizes GDP-mannose from GTP and mannose-1-phosphate in cell wall biosynthesis; required for normal cell wall structure		-0.140474	-0.013858	-0.173944	-0.344204	-0.162264	0.091452	0.004263	-0.0671635	0.15127	0.020724	-0.399095	-0.179244	0.0482365
YDL056W	MBP1	851503	4	Transcription factor involved in regulation of cell cycle progression from G1 to S phase, forms a complex with Swi6p that binds to MluI cell cycle box regulatory element in promoters of DNA synthesis genes	MBF complex	0.160223	0.056813	0.0463435	0.085904	-0.289637	-0.121059	-0.097891	-0.325652	-0.113415	0.283651	-0.146362	-0.222479	-0.113022
YDL058W	USO1	851501	4	Essential protein involved in the vesicle-mediated ER to Golgi transport step of secretion; binds membranes and functions during vesicle docking to the Golgi; required for assembly of the ER-to-Golgi SNARE complex		-0.0406216	-0.042646	0.0337235	0.082833	0.0721513	0.024895	0.117044	-0.386291	-0.0265225	-0.123655	0.348341	-0.048368	-0.215577
YDL060W	TSR1	851499	4	Protein required for processing of 20S pre-rRNA in the cytoplasm, associates with pre-40S ribosomal particles		0.0101335	-0.045981	0.0251145	0.038742	0.116589	-0.030825	0.009347	0.20733	0.361665	-0.139395	0.097623	-0.318217	-0.156635
YDL061C	RPS29B	851498	4	Protein component of the small (40S) ribosomal subunit; nearly identical to Rps29Ap and has similarity to rat S29 and E. coli S14 ribosomal proteins	cytoplasmic ribosomal small subunit	0.0442773	-0.030691	-0.111756	-0.267634	-0.0436015	-0.090218	-0.053627	0.498079	-1.76071	-0.117313	0.036351	0.010891	-0.117514
YDL063C	YDL063C	851497	4	Protein required for biogenesis of the large ribosomal subunit; green fluorescent protein (GFP)-fusion protein localizes to the cytoplasm and nucleus		0.0885043	-0.078434	-0.117247	0.309942	0.0049362	-0.674633	-0.882141	0.102344	0.18557	-1.51218	0.627212	-0.217034	-0.0208025
YDL064W	UBC9	851495	4	SUMO-conjugating enzyme involved in the Smt3p conjugation pathway; nuclear protein required for S- and M-phase cyclin degradation and mitotic control; involved in proteolysis mediated by the anaphase-promoting complex cyclosome (APCC)		0.228878	-0.073282	0.130055	0.074044	-0.169022	-0.149617	-0.202319	-0.149435	-0.0156779	0.071395	0.039018	0.005861	0.29893
YDL065C	PEX19	851494	4	Chaperone and import receptor for newly-synthesized class I peroxisomal membrane proteins (PMPs), binds PMPs in the cytoplasm and delivers them to the peroxisome for subsequent insertion into the peroxisomal membrane		0.0095437	-0.050966	-0.0941399	-0.452199	0.136209	-0.008588	-0.05296	0.0069085	0.418008	-0.014871	0.227196	0.270178	-0.0869615
YDL066W	IDP1	851493	4	Mitochondrial NADP-specific isocitrate dehydrogenase, catalyzes the oxidation of isocitrate to alpha-ketoglutarate; not required for mitochondrial respiration and may function to divert alpha-ketoglutarate to biosynthetic processes		0.273493	-0.191446	-0.12374	0.532571	-0.442054	-0.347657	-0.227021	-0.0225835	0.0002876	-0.658472	0.106803	-0.463931	-0.475309
YDL072C	YET3	851487	4	Protein of unknown function; YET3 null mutant decreases the level of secreted invertase; homolog of human BAP31 protein		-0.135242	0.198789	0.0674545	-0.080153	0.345817	0.288118	0.570279	0.38992	0.442693	0.407607	0.498088	0.543508	0.394151
YDL073W	YDL073W	851486	4	Putative protein of unknown function; YDL073W is not an essential gene		0.0872813		0.12925	0.131759	-0.0997458	-0.107309	-0.007014	0.141177	0.0983969	-0.262228	-0.160482	-0.15412	-0.167395
YDL074C	BRE1	851485	4	E3 ubiquitin ligase, forms heterodimer with Rad6p to monoubiquinate histone H2B-K123, which is required for the subsequent methylation of histone H3-K4 and H3-K79; required for DSBR, transcription, silencing, and checkpoint control	Lge1p/Bre1p complex	0.0400713	-0.088883	0.0474365	-0.058983	-0.192325	-0.106235	-0.191478	-0.258337	0.23804	-0.079261	0.005033	-0.35435	0.206859
YDL075W	RPL31A	851484	4	Protein component of the large (60S) ribosomal subunit, nearly identical to Rpl31Bp and has similarity to rat L31 ribosomal protein; associates with the karyopherin Sxm1p; loss of both Rpl31p and Rpl39p confers lethality	cytoplasmic ribosomal large subunit	-0.0052018	-0.074934	-0.0810835	-0.338174	-0.0233914	-0.032642	0.037774	0.154216	-0.115832	-0.136067	-0.245462	-0.415039	-0.156793
YDL076C	RXT3	851483	4	Subunit of the RPD3L complex; involved in histone deacetylation	Rpd3L complex	0.0382743	0.349001		-0.201601	-0.665403	-0.131657	-0.234119	-0.272283	-0.512727	0.314411		0.0797677	0.169022
YDL077C	VAM6	851482	4	Vacuolar protein that plays a critical role in the tethering steps of vacuolar membrane fusion by facilitating guanine nucleotide exchange on small guanosine triphosphatase Ypt7p	HOPS complex	-0.0579298	0.004367	0.185588	-0.226868	0.137845	0.159546	0.109734		0.105745	0.029204	0.029372	-0.032157	-0.268472
YDL078C	MDH3	851481	4	Peroxisomal malate dehydrogenase, catalyzes interconversion of malate and oxaloacetate; involved in the glyoxylate cycle		-0.0757087	0.073716	-0.0512555	-0.147951	0.0260369	0.235028	0.036283	-0.121545	-0.145387	0.03851	-0.14511	0.281579	-0.158365
YDL081C	RPP1A	851478	4	Ribosomal stalk protein P1 alpha, involved in the interaction between translational elongation factors and the ribosome; accumulation of P1 in the cytoplasm is regulated by phosphorylation and interaction with the P2 stalk component	cytoplasmic ribosomal large subunit	-0.0011094	-0.028542	-0.138449	-0.228127	-0.0219392	-0.20339	-0.004102	0.164319	-0.0201723	-0.243716	-0.093812	-0.315005	-0.0738545
YDL082W	RPL13A	851477	4	Protein component of the large (60S) ribosomal subunit, nearly identical to Rpl13Bp; not essential for viability; has similarity to rat L13 ribosomal protein	cytoplasmic ribosomal large subunit	0.0433911	-0.041795	-0.003698	-0.257001	-0.0340497	-0.0553595	1.5e-06	0.145367	-0.0535465	-0.124272	-0.229864	-0.401111	-0.131477
YDL083C	RPS16B	851476	4	Protein component of the small (40S) ribosomal subunit; identical to Rps16Ap and has similarity to E. coli S9 and rat S16 ribosomal proteins	cytoplasmic ribosomal small subunit	-0.0001883	0.022625	-0.042666	-0.296553	-0.0209218	-0.0708195	0.0459135	0.168741	0.0095832	-0.0540425	-0.234991	-0.308778	-0.152935
YDL084W	SUB2	851475	4	Component of the TREX complex required for nuclear mRNA export; member of the DEAD-box RNA helicase superfamily and is involved in early and late steps of spliceosome assembly; homolog of the human splicing factor hUAP56	transcription export complex	0.0410743	-0.116794	0.0036265	-0.214456	-0.156136	-0.158902	-0.084939	-0.134054	-0.249573	-0.111526	-0.009287	-0.206372	-0.0023625
YDL085C-A	YDL085C-A	851473	4	Putative protein of unknown function; green fluorescent protein (GFP)-fusion protein localizes to the cytoplasm and nucleus				0.0848435	0.319689	-0.600915	-0.493513	-0.326859		-0.401266	-0.232396		-0.217791	-0.348735
YDL086W	YDL086W	851472	4	Putative protein of unknown function; the authentic, non-tagged protein is detected in highly purified mitochondria in high-throughput studies; YDL086W is not an essential gene		0.0119868	-0.037674	0.268257	0.139247	-0.30404	-0.064362	-0.253271	0.153564	0.0300375	-0.138613	-0.572842	-0.083668	0.0157885
YDL087C	LUC7	851471	4	Essential protein associated with the U1 snRNP complex; splicing factor involved in recognition of 5' splice site; contains two zinc finger motifs; N-terminal zinc finger binds pre-mRNA	commitment complex|U1 snRNP complex			-0.0865796	0.184272			-0.586864		2.16912	0.227331		-0.231358	0.222956
YDL088C	ASM4	851470	4	Nuclear pore complex subunit, part of a subcomplex also containing Nup53p, Nup170p, and Pse1p	karyopherin docking subcomplex of the Nuclear Pore Complex (NPC)	0.0339719	-0.001617	2.5e-06	-0.030288	0.038831	-0.134368	-0.040355	-0.218571	0.0448766	-0.096669	0.014901	0.030675	-0.0426015
YDL089W	NUR1	851469	4	Protein of unknown function; interacts with Csm1p, Lrs4p; required for rDNA repeat stability; null mutant causes increase in unequal sister-chromatid exchange; GFP-fusion protein localizes to the nuclear periphery, possible Cdc28p substrate		-0.0174164	0.142775	-0.0246495	0.109874	-0.600304	0.190238	0.274795	-0.233697	0.199669	0.309945	0.378054	0.329467	0.0143165
YDL090C	RAM1	851468	4	Beta subunit of the CAAX farnesyltransferase (FTase) that prenylates the a-factor mating pheromone and Ras proteins; required for the membrane localization of Ras proteins and a-factor; homolog of the mammalian FTase beta subunit	protein farnesyltransferase complex	0.0270746	-0.226923	-0.349179	-0.059428		-0.104498	-0.35097		-0.537091	-0.351838	0.180623	-0.032807	-0.211487
YDL091C	UBX3	851467	4	UBX (ubiquitin regulatory X) domain-containing protein that interacts with Cdc48p, green fluorescent protein (GFP)-fusion protein localizes to the cytoplasm in a punctate pattern		-0.396272	-0.282247	0.0357515	0.106331	-0.15711	-0.09173	-0.072099	-0.0597965	-0.386524	0.106022		0.257635	-0.220282
YDL092W	SRP14	851466	4	Signal recognition particle (SRP) subunit, interacts with the RNA component of SRP to form the Alu domain, which is the region of SRP responsible for arrest of nascent chain elongation during membrane targeting; homolog of mammalian SRP14	Signal recognition particle (SRP)	-0.002791	0.025135	-0.105199	0.121677	-0.119552	-0.069748	0.00998	0.260958	-0.0391885	0.041015	-0.042987	-0.121927	0.0838765
YDL093W	PMT5	851464	4	Protein O-mannosyltransferase, transfers mannose residues from dolichyl phosphate-D-mannose to protein serine/threonine residues; acts in a complex with Pmt3p, can instead interact with Pmt2p in some conditions; target for new antifungals	Protein O-mannosyltransferase(Pmt3p/Pmt5p)	-0.0191639	-0.088914		0.279807	0.127075	-0.025874		0.27659		-0.605638		0.0942751	0.232105
YDL095W	PMT1	851462	4	Protein O-mannosyltransferase, transfers mannose from dolichyl phosphate-D-mannose to protein Ser/Thr residues; 1 of 7 related proteins involved in O-glycosylation which is essential for cell wall rigidity; involved in ER quality control	Protein O-mannosyltransferase(Pmt1p/Pmt2p)	-0.0374948	-0.031676	-0.0737986	-0.042096	0.0832153	-0.000405	-0.012055	-0.20423	-0.0806539	0.041579	-0.258413	-0.329992	0.170565
YDL097C	RPN6	851461	4	Essential, non-ATPase regulatory subunit of the 26S proteasome lid required for the assembly and activity of the 26S proteasome; the human homolog (S9 protein) partially rescues Rpn6p depletion	19/22S regulator	-0.0504965	-0.002717	0.211143	0.036445	0.123186	0.057076	0.150481	0.0668115	0.0601959	0.061039	0.121779	0.160234	0.0958745
YDL098C	SNU23	851460	4	Component of U4/U6.U5 snRNP involved in mRNA splicing via spliceosome	U4/U6 x U5 tri-snRNP complex	0.0610813	-0.245653	0.269751	-0.314201		-0.033437	-0.055409	0.459321	-0.0750581	0.0839672	-0.371395	-0.000868	0.0975405
YDL099W	BUG1	851459	4	Cis-golgi localized protein involved in ER to Golgi transport; forms a complex with the mammalian GRASP65 homolog, Grh1p; mutants are compromised for the fusion of ER-derived vesicles with Golgi membranes	Grh1p/Bug1p complex	-0.0072844	-0.111643	0.0269765	-0.023075	-0.164719	-0.264506	-0.113761	-0.173696	-0.0926535	-0.218584	0.428857	0.184109	-0.0696405
YDL100C	GET3	851458	4	Guanine nucleotide exchange factor for Gpa1p; amplifies G protein signaling; subunit of the GET complex, which is involved in Golgi to ER trafficking and insertion of proteins into the ER membrane; has low-level ATPase activity	GET complex	-0.0328224	-0.188201	0.11854	-0.109448	0.183644	0.069675	0.155243	0.0420475	0.295294	-0.154064	-0.010127	-0.024709	0.0209835
YDL101C	DUN1	851457	4	Cell-cycle checkpoint serine-threonine kinase required for DNA damage-induced transcription of certain target genes, phosphorylation of Rad55p and Sml1p, and transient G2/M arrest after DNA damage; also regulates postreplicative DNA repair		0.0226697	-0.058438	0.171399	0.026068	-0.0343473	-0.002164	-0.13114	-0.0519835	-0.0448413	-0.300493	-0.089973	0.0813889	0.0934585
YDL102W	POL3	851456	4	Catalytic subunit of DNA polymerase delta; required for chromosomal DNA replication during mitosis and meiosis, intragenic recombination, repair of double strand DNA breaks, and DNA replication during nucleotide excision repair (NER)	DNA polymerase delta complex	0.0921363	0.032511	0.0881185	0.021733	-0.0452964	0.0508	0.250788	0.252153	-0.246901	-0.029423	-0.005085	0.0793989	0.107216
YDL103C	QRI1	851455	4	UDP-N-acetylglucosamine pyrophosphorylase, catalyzes the formation of UDP-N-acetylglucosamine (UDP-GlcNAc), which is important in cell wall biosynthesis, protein N-glycosylation, and GPI anchor biosynthesis		0.0133015	-0.053152	-0.0751566	-0.006111	-0.0898678	-0.030954	-0.12502	-0.136703	-0.0586315	-0.126747	0.126614	0.047123	-0.0899995
YDL104C	QRI7	851454	4	Highly conserved mitochondrial protein, essential for stability of the mitochondrial genome; functional homolog of the essential E. coli ygjD gene; member of a family of proteins putatively involved in genome maintenance		-0.0894495	-0.520854	-0.0959371	-0.176878		0.199819	0.0933033	0.296868	-0.808217	0.439882	0.244309	0.578678	0.113986
YDL105W	NSE4	851453	4	Nuclear protein that plays a role in the function of the Smc5p-Rhc18p complex	smc5p-Smc6p complex	0.119952	-0.157537	-0.0203005	0.023277	-0.146032	-0.208919	-0.142388	-0.134067	-0.595389	-0.02811	-0.029474	-0.037144	0.407946
YDL106C	PHO2	851452	4	Homeobox transcription factor; regulatory targets include genes involved in phosphate metabolism; binds cooperatively with Pho4p to the PHO5 promoter; phosphorylation of Pho2p facilitates interaction with Pho4p		-0.0435874	0.123397	0.0769715	0.076089	-0.137198	-0.031713	-0.117237	-0.0906735	0.386215		0.072404	0.037691	0.112166
YDL107W	MSS2	851451	4	Peripherally bound inner membrane protein of the mitochondrial matrix involved in membrane insertion of C-terminus of Cox2p, interacts genetically and physically with Cox18p		-0.23558	0.110571	-0.0695897			2.41867					-0.363886	0.676959	0.0257495
YDL108W	KIN28	851450	4	Serine/threonine protein kinase, subunit of the transcription factor TFIIH; involved in transcription initiation at RNA polymerase II promoters	transcription factor TFIIH complex	-0.18318	0.002349	-0.560941	0.422726	-0.217149	0.085927	0.142235	-0.104346	0.131769	-0.142917	0.033466	0.036939	0.0755685
YDL110C	TMA17	851448	4	Protein of unknown function that associates with ribosomes; heterozygous deletion demonstrated increases in chromosome instability in a rad9 deletion background; protein abundance is decreased upon intracellular iron depletion		-0.405855	0.405853	-0.0029545	-0.518488	0.211713	0.608625	0.100077	0.758055	0.142785	0.619593	-0.482052	1.0914	0.100049
YDL111C	RRP42	851447	4	Exosome non-catalytic core component; involved in 3'-5' RNA processing and degradation in both the nucleus and the cytoplasm; has similarity to E. coli RNase PH and to human hRrp42p (EXOSC7)	Nuclear exosome complex|Cytoplasmic exosome complex	-0.0302869	-0.053042	0.183076	0.257052	-0.0505037	-0.089954	-0.172855	0.252267	-0.173851	-0.042564	-0.158775	-0.048376	0.133945
YDL112W	TRM3	851446	4	2'-O-ribose methyltransferase, catalyzes the ribose methylation of the guanosine nucleotide at position 18 of tRNAs		0.0222445	-0.084465	0.0114535	0.151706	0.0607522	-0.04241	0.221695	0.0497065	-0.242737	0.001968	0.041634	-0.103282	-0.0768375
YDL113C	ATG20	851445	4	Sorting nexin family member required for the cytoplasm-to-vacuole targeting (Cvt) pathway and for endosomal sorting; has a Phox homology domain that binds phosphatidylinositol-3-phosphate; interacts with Snx4p; potential Cdc28p substrate	Atg20p/Snx4p/Snx41p complex	-0.102265	0.207231	0.17875	-0.061528	-0.189721	0.124663	0.0526821	-0.397423	0.348889	0.053711	0.215542	0.197925	0.20158
YDL115C	IWR1	851442	4	Protein involved in transcription from polymerase II promoters; interacts with with most of the polymerase II subunits; nucleo-cytoplasmic shuttling protein; deletion causes hypersensitivity to the K1 killer toxin		0.0429763	0.229685	-0.122131	0.198689	0.0405739	0.07745	-0.178952	-0.807736	-0.0884355	0.278968	0.024348	0.064598	-0.116727
YDL116W	NUP84	851441	4	Subunit of the nuclear pore complex (NPC), forms a subcomplex with Nup85p, Nup120p, Nup145p-C, Sec13p, and Seh1p that plays a role in nuclear mRNA export and NPC biogenesis	Nup84p complex	-0.0116214	0.019452	0.0418735	0.16272	0.0683297	-0.041316	0.104353	-0.0584765	-0.0040069	0.002567	-0.009079	-0.121823	0.0647715
YDL117W	CYK3	851440	4	SH3-domain protein located in the mother-bud neck and the cytokinetic actin ring; mutant phenotype and genetic interactions suggest a role in cytokinesis		0.0863393	0.072009	0.169108	-0.05424	0.13739	0.044376	0.034563	0.113137	0.0100631	-0.150235	-0.643967	0.141584	-0.192556
YDL121C	YDL121C	851436	4	Putative protein of unknown function; green fluorescent protein (GFP)-fusion protein localizes to the endoplasmic reticulum; YDL121C is not an essential protein		0.0818123	-0.302944	0.0498095	-0.175557	0.178452	-0.011033	-0.075381	0.203339	0.0174535	-0.04698	0.222697	-0.213627	0.0902845
YDL122W	UBP1	851435	4	Ubiquitin-specific protease that removes ubiquitin from ubiquitinated proteins; cleaves at the C terminus of ubiquitin fusions irrespective of their size; capable of cleaving polyubiquitin chains		0.0636673	0.027502	0.0724745	0.039679	-0.0801198	-0.049938	0.0753652	-0.112245	0.0915849	0.027055	0.013275	0.051619	0.251085
YDL124W	YDL124W	851433	4	NADPH-dependent alpha-keto amide reductase; reduces aromatic alpha-keto amides, aliphatic alpha-keto esters, and aromatic alpha-keto esters; member of the aldo-keto reductase (AKR) family		-0.487276	1.13139	-0.54205	-0.96645	1.21746	1.28783	0.894544	-1.16451	1.20804	1.69048	-0.344126	0.054289	-0.226917
YDL125C	HNT1	851432	4	Adenosine 5'-monophosphoramidase; interacts physically and genetically with Kin28p, a CDK and TFIIK subunit, and genetically with CAK1; member of the histidine triad (HIT) superfamily of nucleotide-binding proteins and similar to Hint		0.198699	-0.136453	0.114499	-0.253108	-0.349185	0.023825	-0.171525	0.100098	0.475166	-0.23126	-0.015069	0.134291	-0.301209
YDL126C	CDC48	851431	4	ATPase in ER, nuclear membrane and cytosol with homology to mammalian p97; in a complex with Npl4p and Ufd1p participates in retrotranslocation of ubiquitinated proteins from the ER into the cytosol for degradation by the proteasome	Cdc48p complex	-0.0183271	-0.10528	0.2341	-0.116055	0.292046	0.132948	0.165062	0.0707435	0.281505	0.159209	0.459624	0.149923	0.0745835
YDL130W	RPP1B	851427	4	Ribosomal protein P1 beta, component of the ribosomal stalk, which is involved in interaction of translational elongation factors with ribosome; accumulation is regulated by phosphorylation and interaction with the P2 stalk component	cytoplasmic ribosomal large subunit	-0.0088646	-0.057215	-0.0279425	-0.313373	-0.0139661	-0.105137	-0.066984	0.0924595	-0.0593635	-0.191147	-0.279913	-0.456909	-0.241788
YDL130W-A	STF1	851426	4	Protein involved in regulation of the mitochondrial F1F0-ATP synthase; Stf1p and Stf2p may act as stabilizing factors that enhance inhibitory action of the Inh1p protein	mitochondrial ATPase inhibitor complex	-0.210799	0.605367	0.138402	-0.406099	0.883744	1.00538	0.197579		0.839729	0.814633		0.889941	-0.143696
YDL131W	LYS21	851425	4	Homocitrate synthase isozyme, catalyzes the condensation of acetyl-CoA and alpha-ketoglutarate to form homocitrate, which is the first step in the lysine biosynthesis pathway; highly similar to the other isozyme, Lys20p		0.264149	0.050879	-0.21369	0.487571	-0.500838	-0.133512	-0.434066	0.697976	0.465473	-0.848323	0.477916	-0.449244	-0.34102
YDL132W	CDC53	851424	4	Cullin, structural protein of SCF complexes (which also contain Skp1p, Cdc34p, Hrt1p and an F-box protein) involved in ubiquitination; SCF promotes the G1-S transition by targeting G1 cyclins and the Cln-CDK inhibitor Sic1p for degradation	SCF-CDC4 complex|nuclear ubiquitin ligase complex	-0.116362	-0.018654	0.0340165	-0.232882	0.229465	0.098824	0.231829	-0.148007	0.382558	0.186147	0.245432	0.200102	0.0444235
YDL133W	YDL133W	851423	4	Putative protein of unknown function			0.026072	-0.518087			-0.091909			0.0796659			-0.029693
YDL134C	PPH21	851421	4	Catalytic subunit of protein phosphatase 2A (PP2A), functionally redundant with Pph22p; methylated at C terminus; forms alternate complexes with several regulatory subunits; involved in signal transduction and regulation of mitosis	protein phosphatase type 2A complex (Cdc55p)|protein phosphatase type 2A complex (Rts1p)|Tap42p/Pph21p/Rrd2p complex	-0.0398352	0.118398	-0.0126395	0.493042	-0.219332	-0.0326675	-0.0405585	-0.2153	0.29891	0.087079	0.133249	0.130363	0.67132
YDL135C	RDI1	851420	4	Rho GDP dissociation inhibitor involved in the localization and regulation of Cdc42p		-0.0259175	-0.091077	-0.0241775	-0.169397	-0.166046	-0.073435	-0.416864	-0.0529075	0.331523	-0.113412	0.182959	0.360572	0.150308
YDL136W	RPL35B	851419	4	Protein component of the large (60S) ribosomal subunit, identical to Rpl35Ap and has similarity to rat L35 ribosomal protein	cytoplasmic ribosomal large subunit	-0.0088862	-0.067646	-0.024757	-0.289311	-0.029567	-0.0655385	-0.0037935	0.142842	-0.002859	-0.154852	-0.195803	-0.379767	-0.130192
YDL137W	ARF2	851418	4	ADP-ribosylation factor, GTPase of the Ras superfamily involved in regulation of coated formation vesicles in intracellular trafficking within the Golgi; functionally interchangeable with Arf1p		-0.0466489	-0.043984	0.005315	-0.059967	0.0922314	0.121478	0.0018375	-0.092235	0.0778612	-0.0070195	-0.0618775	-0.253615	0.0250785
YDL139C	SCM3	851416	4	Nonhistone component of centromeric chromatin that binds stoichiometrically to CenH3-H4 histones, required for kinetochore assembly; required for G2/M progression and localization of Cse4p; may protect Cse4p from ubiquitylation		0.142523	-0.201115	-0.157884	0.405313		-0.016951	-0.204626	-0.133749	0.131091	-0.185013	0.039628	0.291319	0.355888
YDL140C	RPO21	851415	4	RNA polymerase II largest subunit B220, part of central core; phosphorylation of C-terminal heptapeptide repeat domain regulates association with transcription and splicing factors; similar to bacterial beta-prime	DNA-directed RNA polymerase II complex	-0.033792	-0.024091	0.0158955	-0.039621	-0.140607	0.045678	0.0723974	-0.177013	0.0776969	-0.038364	0.137317	-0.126875	0.0373305
YDL141W	BPL1	851414	4	Biotin:apoprotein ligase, covalently modifies proteins with the addition of biotin, required for acetyl-CoA carboxylase (Acc1p) holoenzyme formation		0.0046482	0.004725	-0.0134465	0.211884	-0.0183583	-0.057875	0.032619	-0.277832	-0.15857	-0.142138	-0.045325	-0.116937	0.0398795
YDL143W	CCT4	851412	4	Subunit of the cytosolic chaperonin Cct ring complex, related to Tcp1p, required for the assembly of actin and tubulins in vivo	chaperonin-containing T-complex	0.0379143	-0.112795	0.119793	0.142301	0.0116135	-0.019262	0.0832616	0.0962545	0.0115649	-0.038764	0.000979	-0.129575	-0.0086845
YDL144C	YDL144C	851411	4	Putative protein of unknown function; green fluorescent protein (GFP)-fusion protein localizes to the cytoplasm and nucleus; YDL144C is not an essential gene.		-0.0438542	-0.064133	0.326178	-0.390194	0.0892659	0.263917	-0.118528	-0.0261685	-0.0438881	-0.186648	-0.082338	0.238345	0.171725
YDL145C	COP1	851410	4	Alpha subunit of COPI vesicle coatomer complex, which surrounds transport vesicles in the early secretory pathway	COPI	-0.0465956	-0.072393	0.0681605	-0.025622	-0.0360388	-0.027101	-0.08873	-0.276776	-0.160238	-0.070903	0.046321	-0.176126	-0.102423
YDL147W	RPN5	851408	4	Essential, non-ATPase regulatory subunit of the 26S proteasome lid, similar to mammalian p55 subunit and to another S. cerevisiae regulatory subunit, Rpn7p	19/22S regulator	-0.0381407	-0.020875	0.136921	0.046527	0.27914	0.084064	0.14568	0.0204775	0.42766	0.126856	0.228003	0.030981	0.110331
YDL148C	NOP14	851407	4	Nucleolar protein, forms a complex with Noc4p that mediates maturation and nuclear export of 40S ribosomal subunits; also present in the small subunit processome complex, which is required for processing of pre-18S rRNA	Noc4p/Nop14p complex	-0.0039059	0.036147	-0.0187875	-0.064722	0.198981	-0.040147	0.161211	0.0896405	0.218396	0.016989	0.186565	-0.223127	-0.118897
YDL149W	ATG9	851406	4	Transmembrane protein involved in forming Cvt and autophagic vesicles; cycles between the phagophore assembly site (PAS) and other cytosolic punctate structures, not found in autophagosomes; may be involved in membrane delivery to the PAS			0.17597	-0.117824		0.238991	-0.070661	0.140523			0.137977		0.5913	-0.170665
YDL150W	RPC53	851404	4	RNA polymerase III subunit C53	DNA-directed RNA polymerase III complex	0.0562203	0.018321	-0.103726	0.109798	0.129594	-0.013875	-0.07326	-0.0149275	0.189561	0.03154	-0.182108	-0.208073	-0.0490385
YDL153C	SAS10	851403	4	Essential subunit of U3-containing Small Subunit (SSU) processome complex involved in production of 18S rRNA and assembly of small ribosomal subunit; disrupts silencing when overproduced; mutant has increased aneuploidy tolerance		0.159762	-0.01327	-0.188443	0.106916	0.166666	-0.059281	-0.00534	0.204485	0.169792	0.081017	0.149865	-0.260253	-0.0554705
YDL156W	YDL156W	851399	4	Putative protein of unknown function; protein sequence contains three WD domains (WD-40 repeat); green fluorescent protein (GFP)-fusion protein localizes to the cytoplasm and nucleus		0.0617123	0.18189	-0.0461995	-0.052539	1.24149	0.03704	-0.213696	-0.0222565	0.0518049	0.073016	-0.306127	0.0888876	-0.0208365
YDL157C	YDL157C	851398	4	Putative protein of unknown function; the authentic, non-tagged protein is detected in highly purified mitochondria in high-throughput studies		0.0349382	0.171492	0.408026	-0.115082	0.252096	0.461405	0.690669	1.09211	-0.132154	0.06931	-0.16552	0.674829	-0.454939
YDL159W	STE7	851396	4	Signal transducing MAP kinase kinase involved in pheromone response, where it phosphorylates Fus3p, and in the pseudohyphal/invasive growth pathway, through phosphorylation of Kss1p; phosphorylated by Ste11p, degraded by ubiquitin pathway	STE5-MAPK complex	-0.115763	-0.329402	-0.0074255	-0.028077	-0.0188903	-0.210043	0.181492	-0.206081	-0.0956976	0.265518	0.147096	0.0852721	0.118655
YDL160C	DHH1	851394	4	Cytoplasmic DExD/H-box helicase, stimulates mRNA decapping, coordinates distinct steps in mRNA function and decay, interacts with both the decapping and deadenylase complexes, may have a role in mRNA export and translation		-0.0063917	0.098731	0.0219225	-0.167644	0.0229064	-0.042676	-0.053996	-0.117299	-0.121836	0.196467	-0.35686	-0.083671	0.0975285
YDL160C-A	YDL160C-A	1466431	4	Putative protein of unknown function; mutant in a srs2 mutant background displays MMS hypersensitivity; ortholog of human MHF2, a component of the Fanconi anemia (FA) complex that is involved in maintaining genome stability		-0.146993	-0.113461	-0.10635	0.054288	0.0397574	0.069285	-0.159241	0.412127	0.0823009	-0.318838	-0.42087	0.386581	-0.0752265
YDL161W	ENT1	851392	4	Epsin-like protein involved in endocytosis and actin patch assembly and functionally redundant with Ent2p; binds clathrin via a clathrin-binding domain motif at C-terminus		-0.0778107	0.03383	0.0448835	0.455099	-0.181371	-0.080669	-0.06106	-0.193329	0.0500649	0.0973119	0.289423	0.106215	0.204643
YDL164C	CDC9	851391	4	DNA ligase found in the nucleus and mitochondria, an essential enzyme that joins Okazaki fragments during DNA replication; also acts in nucleotide excision repair, base excision repair, and recombination		-0.13255	-0.101898	0.176723	-0.090114	0.38121	-0.055252	0.156222	0.0063315	-0.208978	-0.058947	-0.310062	0.058778	0.144601
YDL166C	FAP7	851388	4	Essential NTPase required for small ribosome subunit synthesis, mediates processing of the 20S pre-rRNA at site D in the cytoplasm but associates only transiently with 43S preribosomes via Rps14p, may be the endonuclease for site D		-0.0291429	-0.022801	0.0366535	-0.036795	0.209403	0.184059	0.0673827	-0.0866215	0.189356	0.000356	0.095551	0.048915	-0.651338
YDL167C	NRP1	851387	4	Putative RNA binding protein of unknown function; localizes to stress granules induced by glucose deprivation; predicted to be involved in ribosome biogenesis		0.0766303	-0.080774	-0.135655	-0.173221	0.0335485	-0.22675	-0.195701	0.0483335	-0.269985	-0.082585	-0.198119	-0.237004	-0.103382
YDL168W	SFA1	851386	4	Bifunctional enzyme containing both alcohol dehydrogenase and glutathione-dependent formaldehyde dehydrogenase activities, functions in formaldehyde detoxification and formation of long chain and complex alcohols, regulated by Hog1p-Sko1p		0.125551	-0.22187	0.133802	-0.270939	0.0863618	-0.251269	-0.136976	-0.0597505	0.0509389	0.174413	0.111052	-0.218499	0.0906775
YDL171C	GLT1	851383	4	NAD(+)-dependent glutamate synthase (GOGAT), synthesizes glutamate from glutamine and alpha-ketoglutarate; with Gln1p, forms the secondary pathway for glutamate biosynthesis from ammonia; expression regulated by nitrogen source		0.197785	-0.113602	-0.215423	0.402433	-0.465733	-0.325304	-0.417953	0.556081	-0.726492	-0.509697	0.043669	-0.056757	-0.513804
YDL173W	YDL173W	851381	4	Putative protein of unknown function; hyperphosphorylated upon rapamycin treatment in a Tap42p-dependent manner; green fluorescent protein (GFP)-fusion protein localizes to the cytoplasm; PAR32 is not an essential gene		-0.0067425	0.20255	0.0855985	0.142257	0.392132	0.046829	0.301097	0.0268635	-0.210712	0.20224	-0.486023	0	-0.0828755
YDL174C	DLD1	851380	4	D-lactate dehydrogenase, oxidizes D-lactate to pyruvate, transcription is heme-dependent, repressed by glucose, and derepressed in ethanol or lactate; located in the mitochondrial inner membrane		0.0537753	0.260256	0.570611	0.286638	0.0980394	0.490551	0.19767	0.259049	-0.732664	0.362176	-1.21385	-0.04331	0.172329
YDL175C	AIR2	851379	4	Zinc knuckle protein, involved in nuclear RNA processing and degredation as a component of the TRAMP complex; stimulates the poly(A) polymerase activity of Pap2p in vitro; functionally redundant with Air1p	TRAMP complex (Air2p)	0.0522913	-0.062564	-0.131823	-0.110053	0.185396	-0.759797	-0.156594	0.398726	-0.0275894	-0.227754	0.162684	0.754406	-0.119241
YDL177C	YDL177C	851377	4	Putative protein of unknown function; similar to the mouse IMPACT gene; YDL177C is not an essential gene		0.0635293	0.261721	0.766876	0.251726	-0.137339	-0.527932	-0.208544					0.801986	0.637746
YDL178W	DLD2	851376	4	D-lactate dehydrogenase, located in the mitochondrial matrix		0.0985413	0.000863	-0.0362135	0.256518	-0.104343	-0.027571	-0.182006	0.222328	-0.738636	-0.025449	-0.065268	0.104051	0.0713405
YDL180W	YDL180W	851374	4	Putative protein of unknown function; green fluorescent protein (GFP)-fusion protein localizes to the vacuole			0.177054	0.526111	0.29236	0.225645	-0.09012	-0.022118	0.0164185	-0.480129	0.41784	0.463065		-0.167696
YDL181W	INH1	851347	4	Protein that inhibits ATP hydrolysis by the F1F0-ATP synthase; inhibitory function is enhanced by stabilizing proteins Stf1p and Stf2p; has similarity to Stf1p; has a calmodulin-binding motif and binds calmodulin in vitro	mitochondrial ATPase inhibitor complex|F0/F1 ATP synthase (complex V)	-0.0760107	0.802596	0.751305		0.191328	0.706429	0.467086	1.22343	-1.34733	0.640671	-0.474627	1.32587	-0.456376
YDL182W	LYS20	851346	4	Homocitrate synthase isozyme, catalyzes the condensation of acetyl-CoA and alpha-ketoglutarate to form homocitrate, which is the first step in the lysine biosynthesis pathway; highly similar to the other isozyme, Lys21p		0.406503	-0.029226	0.0820235	0.492104	-0.0707258	-0.156436	0.28576	0.257613	-0.0993124	-0.331306	0.282215	-1.18764	-0.608577
YDL185W	TFP1	851342	4	Subunit A of the eight-subunit V1 peripheral membrane domain of the vacuolar H+-ATPase; protein precursor undergoes self-catalyzed splicing to yield the extein Tfp1p and the intein Vde (PI-SceI), which is a site-specific endonuclease	H+-transporting ATPase, vacuolar|H+-transporting ATPase, Golgi	0.0031723	-0.263648	-0.348382	-0.066752	-0.171898	-0.282419	-0.287286	-0.47636	0.254058	-0.398105	-0.057142	-0.367195	-0.219371
YDL188C	PPH22	851339	4	Catalytic subunit of protein phosphatase 2A (PP2A), functionally redundant with Pph21p; methylated at C terminus; forms alternate complexes with several regulatory subunits; involved in signal transduction and regulation of mitosis		-0.100738	0.040583	0.192171	0.193026	-0.0725388	-0.155014	-0.249435	-0.122689	-0.247189	-0.180066	0.136016	0.659541	0.122196
YDL189W	RBS1	851338	4	Protein of unknown function, identified as a high copy suppressor of psk1 psk2 mutations that confer temperature-sensitivity for galactose utilization; proposed to bind single-stranded nucleic acids via its R3H domain		0.0051833	-0.168523	-0.0613053	0.212362	-0.117383	-0.031597	-0.075865	-0.152973	-0.0689635	-0.24244	0.151037	-0.211783	0.0170575
YDL190C	UFD2	851337	4	Ubiquitin chain assembly factor (E4) that cooperates with a ubiquitin-activating enzyme (E1), a ubiquitin-conjugating enzyme (E2), and a ubiquitin protein ligase (E3) to conjugate ubiquitin to substrates; also functions as an E3		0.0461103	-0.171921	0.0105235	0.180996	0.0088993	-0.005143	0.047687	-0.253462	-0.165824	0.074957	0.364184	-0.02018	0.0141285
YDL191W	RPL35A	851336	4	Protein component of the large (60S) ribosomal subunit, identical to Rpl35Bp and has similarity to rat L35 ribosomal protein	cytoplasmic ribosomal large subunit	-0.0099683	-0.064434	-0.020474	-0.284119	-0.0338705	-0.0593595	-0.0019805	0.143165	-0.0121376	-0.148917	-0.19857	-0.379402	-0.137275
YDL192W	ARF1	851335	4	ADP-ribosylation factor, GTPase of the Ras superfamily involved in regulation of coated vesicle formation in intracellular trafficking within the Golgi; functionally interchangeable with Arf2p	Chs5p/Arf-1binding proteins (ChAPs)	-0.047731	-0.040772	0.009598	-0.054775	0.0879279	0.127657	0.0036505	-0.0919125	0.0685826	-0.001085	-0.064645	-0.25325	0.0179955
YDL193W	NUS1	851334	4	Putative prenyltransferase, required for cell viability; proposed to be involved in protein trafficking because tet-repressible mutant shows accumulation of hypoglycosylated forms of CPY		0.0221466	0.079362	-0.437505	-0.152239	0.455422	-0.088542	0.0698849	-0.0484045	0.173507	0.0996137	-0.135576	0.179757	0.210451
YDL195W	SEC31	851332	4	Component of the Sec13p-Sec31p complex of the COPII vesicle coat, required for vesicle formation in ER to Golgi transport; mutant has increased aneuploidy tolerance	COPII	-0.0137933	-0.019683	0.0276125	-0.037863	-0.0817678	-0.057448	-0.058014	-0.357033	-0.206394	-0.045398	-0.001927	-0.153963	-0.0616235
YDL197C	ASF2	851330	4	Anti-silencing protein that causes derepression of silent loci when overexpressed		-1.5653		-0.145397						-0.38439	-0.170767	0.135113		-0.0893225
YDL198C	GGC1	851329	4	Mitochondrial GTP/GDP transporter, essential for mitochondrial genome maintenance; has a role in mitochondrial iron transport; member of the mitochondrial carrier family		0.508353	0.382499	0.0150135	0.471877	-0.779464	-0.02187	-0.617728	1.10088	-0.372308	-0.479781	1.16735	-0.718614	-0.470998
YDL201W	TRM8	851326	4	Subunit of a tRNA methyltransferase complex composed of Trm8p and Trm82p that catalyzes 7-methylguanosine modification of tRNA	tRNA Methyltransferase Complex	0.168584	-0.057039	0.0126725	-0.146288	-0.0471419	-0.118259	-0.071937	0.0043895	-0.0010271	-0.103995	-0.211077	-0.163491	0.0203365
YDL202W	MRPL11	851325	4	Mitochondrial ribosomal protein of the large subunit	mitochondrial ribosomal large subunit	-0.0182763	0.219175	0.104347	0.157247	0.136813	0.29716	0.028119	0.813125	-0.535729	0.543734	0.115075	0.67937	0.0543395
YDL203C	ACK1	851324	4	Protein that functions upstream of Pkc1p in the cell wall integrity pathway; GFP-fusion protein expression is induced in response to the DNA-damaging agent MMS; non-tagged Ack1p is detected in purified mitochondria		-0.11372	-0.084724	-0.0253605	0.109384	-0.144093	0.001846	-0.046624	-0.384699	-0.440002	-0.151977	-0.100828	-0.090378	-0.0757855
YDL204W	RTN2	851323	4	Protein of unknown function; has similarity to mammalian reticulon proteins; member of the RTNLA (reticulon-like A) subfamily		-1.09594	2.26043	0.623125	-1.43829	2.48749	2.31978	1.86665	1.20357	1.50363	3.08196	-1.69899	0.714151	-2.05789
YDL205C	HEM3	851322	4	Porphobilinogen deaminase, catalyzes the conversion of 4-porphobilinogen to hydroxymethylbilane, the third step in heme biosynthesis; localizes to the cytoplasm and nucleus; expression is regulated by Hap2p-Hap3p, but not by levels of heme		0.104403	-0.035481	0.413505	-0.029187	-0.538479	-0.0849	-0.230286	0.401184	-0.467789	-0.094187	-0.136958	0.208562	-0.123982
YDL207W	GLE1	851320	4	Cytoplasmic nucleoporin required for polyadenylated RNA export but not for protein import; component of Nup82p nuclear pore subcomplex; contains a nuclear export signal	Nup82 nuclear pore subcomplex	-0.0380767	-0.089485	-0.0064395	-0.005153	-0.734615	-0.056606	0.0652814	-0.159683	0.0697229	0.142025	-0.181282	-0.495429	-0.558485
YDL208W	NHP2	851319	4	Nuclear protein related to mammalian high mobility group (HMG) proteins, essential for function of H/ACA-type snoRNPs, which are involved in 18S rRNA processing		0.0467123	-0.035137	0.0514155	-0.059707	-0.03778	-0.084334	-0.026411	0.175611	0.106478	-0.088594	-0.030065	-0.403842	0.139641
YDL209C	CWC2	851318	4	Member of the NineTeen Complex (NTC) that contains Prp19p and stabilizes U6 snRNA in catalytic forms of the spliceosome containing U2, U5, and U6 snRNAs; binds directly to U6 snRNA; similar to S. pombe Cwf2		-0.0785367	0.18838	0.0961405	-0.069478	0.084361	0.056144	-0.0233	0.192511	0.0515509	0.158183	0.344336	0.125098	0.0721765
YDL213C	NOP6	851313	4	Putative RNA-binding protein implicated in ribosome biogenesis; contains an RNA recognition motif (RRM) and has similarity to hydrophilins; NOP6 may be a fungal-specific gene as no homologs have been yet identified in higher eukaryotes		-0.0165415	-0.00711	0.212842	-0.088959	0.280991	0.01857	-0.056371	0.0463425	0.102212	-0.143689	-0.077426	-0.136465	0.106668
YDL215C	GDH2	851311	4	NAD(+)-dependent glutamate dehydrogenase, degrades glutamate to ammonia and alpha-ketoglutarate; expression sensitive to nitrogen catabolite repression and intracellular ammonia levels		-0.0706621	0.474183	-0.683821	1.30002	0.760752	0.987819	0.707275	0.0233265	0.62904	0.723458	0.088007	1.20023	-0.91786
YDL219W	DTD1	851307	4	D-Tyr-tRNA(Tyr) deacylase, functions in protein translation, may affect nonsense suppression via alteration of the protein synthesis machinery; ubiquitous among eukaryotes		0.0807833	-0.202478	-0.0193605	-0.091707	-0.0316188	-0.213242	-0.087077	-0.206628	-0.113935	-0.128704	-0.028502	0.025709	0.218396
YDL220C	CDC13	851306	4	Single stranded DNA-binding protein found at TG1-3 telomere G-tails; regulates telomere replication through recruitment of specific sub-complexes, but the essential function is telomere capping		0.18324		0.318889	0.293612	0.0785494	-0.094978	0.069105	-0.194092	0.0639999	-0.068199		-0.339617	-1.75494
YDL222C	FMP45	851304	4	Integral membrane protein localized to mitochondria (untagged protein); required for sporulation and maintaining sphingolipid content; has sequence similarity to SUR7 and YNL194C						2.13163	2.22484	2.04237			2.18221	-0.742706	-0.55327
YDL223C	HBT1	851303	4	Substrate of the Hub1p ubiquitin-like protein that localizes to the shmoo tip (mating projection); mutants are defective for mating projection formation, thereby implicating Hbt1p in polarized cell morphogenesis		-0.609591	0.305669	0.892824	-0.322867	0.170759	2.19202	1.01601	0.409724	1.32381	2.63059		1.08277	-0.757149
YDL224C	WHI4	851302	4	Putative RNA binding protein and partially redundant Whi3p homolog that regulates the cell size requirement for passage through Start and commitment to cell division		-0.1168	0.118812	-0.151562	-0.089409	-0.0153313	0.15126	-0.117567	-0.0527355	-0.29112	0.101505	0.136499	0.042205	0.0045925
YDL225W	SHS1	851373	4	One of five related septins (Cdc3p, Cdc10p, Cdc11p, Cdc12p, Shs1p) that form a cortical filamentous collar at the mother-bud neck which is necessary for normal morphogenesis and cytokinesis		-0.0366975	-0.128784	-0.0566815	-0.011689	0.0462604	-0.075915	-0.212769	-0.143634	0.152502	-0.104825	0.211441	-0.11325	0.130142
YDL226C	GCS1	851372	4	ADP-ribosylation factor GTPase activating protein (ARF GAP), involved in ER-Golgi transport; shares functional similarity with Glo3p		0.0456023	-0.018748	0.0692915	0.252646	-0.354596	-0.204888	-0.019326	-0.200731	-0.21027	-0.117439	0.221828	0.024977	0.0134305
YDL227C	HO	851371	4	Site-specific endonuclease required for gene conversion at the MAT locus (homothallic switching) through the generation of a ds DNA break; expression restricted to mother cells in late G1 as controlled by Swi4p-Swi6p, Swi5p and Ash1p			0.548144		0.262452		0.619317	1.27145					-0.058137
YDL229W	SSB1	851369	4	Cytoplasmic ATPase that is a ribosome-associated molecular chaperone, functions with J-protein partner Zuo1p; may be involved in folding of newly-made polypeptide chains; member of the HSP70 family; interacts with phosphatase subunit Reg1p		0.571609	-0.171949	-0.0244715	-0.342484	-0.125532	-0.225595	-0.0969865	-0.862168	-0.205329	-0.214061	0.179894	-0.575219	-0.0052605
YDL230W	PTP1	851368	4	Phosphotyrosine-specific protein phosphatase that dephosphorylates a broad range of substrates in vivo, including Fpr3p; localized to the cytoplasm and the mitochondria		-0.106271	-0.003837	0.112656	-0.216095	0.158539	-0.116289	0.0623394		0.131929	0.009834	0.700788	0.429759	0.221671
YDL234C	GYP7	851364	4	GTPase-activating protein for yeast Rab family members including: Ypt7p (most effective), Ypt1p, Ypt31p, and Ypt32p (in vitro); involved in vesicle mediated protein trafficking		-0.149965	-0.238903	-0.209705	0.170132	0.399757	0.40162	0.372956	-0.144126	0.418401	0.207369	0.674108	0.801122	-0.110612
YDL235C	YPD1	851363	4	Phosphorelay intermediate protein, phosphorylated by the plasma membrane sensor Sln1p in response to osmotic stress and then in turn phosphorylates the response regulators Ssk1p in the cytosol and Skn7p in the nucleus		-0.0627753	0.120624	0.195954	-0.184666	0.442677	0.934419	0.225318	0.277792	1.64435	0.482662	-0.007937	0.829595	-0.0696065
YDL236W	PHO13	851362	4	Alkaline phosphatase specific for p-nitrophenyl phosphate; also has protein phosphatase activity		0.120046	-0.006926	-0.278857	0.142597	-0.235012	-0.071179	-0.164347	-0.193887	-0.033921	-0.124158	-0.033423	-0.208776	0.160171
YDL237W	AIM6	851361	4	Putative protein of unknown function, required for respiratory growth; YDL237W is not an essential gene		0.0585213	-0.048571	-0.0786735	0.377293	-0.05085	-0.071383	0.009714	0.103498	-0.442679	-0.227769		-0.026432	0.205226
YDL238C	GUD1	851360	4	Guanine deaminase, a catabolic enzyme of the guanine salvage pathway producing xanthine and ammonia from guanine; activity is low in exponentially-growing cultures but expression is increased in post-diauxic and stationary-phase cultures			-0.407254	0.156554	0.607515				-0.460277
YDL240W	LRG1	851358	4	Putative GTPase-activating protein (GAP) involved in the Pkc1p-mediated signaling pathway that controls cell wall integrity; appears to specifically regulate 1,3-beta-glucan synthesis		-0.264425	0.030925	-0.0295455	0.075317		0.143037	-0.221974	0.0878605	-0.856236	0.043792	-0.156392	0.163187	-0.0173265
YDL248W	COS7	851348	4	Protein of unknown function, member of the DUP380 subfamily of conserved, often subtelomerically-encoded proteins; the authentic, non-tagged protein is detected in highly purified mitochondria in high-throughput studies		-0.190788			0.120343	1.48168	0.39331	0.41506	0.197256	0.266988		0.806024
YDR001C	NTH1	851564	4	Neutral trehalase, degrades trehalose; required for thermotolerance and may mediate resistance to other cellular stresses; may be phosphorylated by Cdc28p		-0.219517	0.283991	-0.0649795	-0.217862	0.645037	0.490226	0.236517	-0.0466585	0.719185	0.576473	-0.361164	0.376942	-0.317968
YDR002W	YRB1	851565	4	Ran GTPase binding protein; involved in nuclear protein import and RNA export, ubiquitin-mediated protein degradation during the cell cycle; shuttles between the nucleus and cytoplasm; is essential; homolog of human RanBP1		0.0383293	-0.164831	-0.0132925	-0.228152	0.0157976	-0.07142	-0.031661	0.0566475	0.222967	-0.118683	-0.076012	-0.071322	0.24006
YDR005C	MAF1	851568	4	Negative regulator of RNA polymerase III; component of several signaling pathways that repress polymerase III transcription in response to changes in cellular environment; targets the initiation factor TFIIIB		0.0763363	0.190784	-0.35004	0.273681	-0.0947138	-0.018268	-0.380212	-0.577981	0.114566	-0.003615	-0.61646	-0.121113	-0.399035
YDR006C	SOK1	851569	4	Protein whose overexpression suppresses the growth defect of mutants lacking protein kinase A activity; involved in cAMP-mediated signaling; localized to the nucleus; similar to the mouse testis-specific protein PBS13		-0.132899	0.171309	0.15028	0.165709	-0.018854	0.190008	0.585562	-0.213844	0.134983	0.504644	-0.265432	0.352383	-0.129135
YDR011W	SNQ2	851574	4	Plasma membrane ATP-binding cassette (ABC) transporter, multidrug transporter involved in multidrug resistance and resistance to singlet oxygen species		0.1591	0.09755	-0.0557535	0.241909	-0.0426169	-0.17086	0.146709	0.298316	-0.313165	0.002651	0.727048	0.17927	-0.439847
YDR012W	RPL4B	851575	4	Protein component of the large (60S) ribosomal subunit, nearly identical to Rpl4Ap and has similarity to E. coli L4 and rat L4 ribosomal proteins	cytoplasmic ribosomal large subunit	0.193104	0.006179	-0.721603	-0.186267	-0.0928668	-0.219199	-0.220273	0.187897	-0.263498	-0.21385	-0.118978	-0.221791	0.0633575
YDR013W	PSF1	851576	4	Subunit of the GINS complex (Sld5p, Psf1p, Psf2p, Psf3p), which is localized to DNA replication origins and implicated in assembly of the DNA replication machinery	GINS complex	-0.695776	0.409904	0.211104	-0.248181	0.496159		0.221619	-0.15716	0.207842			0.125208	0.108541
YDR014W	RAD61	851577	4	Subunit of a complex (Scc3p, Pds5p, Rad61p) that inhibits sister chromatid cohesion; inhibited by Eco1p-acetylated cohesin subunits Smc3p and Mcd1p; related to the human Wapl protein that controls the association of cohesin with chromatin			0.037696	-0.24031	-0.361808	-0.163789	0.114192			-0.526195		0.063022	0.270564
YDR016C	DAD1	851579	4	Essential subunit of the Dam1 complex (aka DASH complex), couples kinetochores to the force produced by MT depolymerization thereby aiding in chromosome segregation; is transferred to the kinetochore prior to mitosis	DASH complex		0.250635			-0.289474		-0.418916	0.220014		-0.320713			-0.181965
YDR017C	KCS1	851580	4	Inositol hexakisphosphate (IP6) and inositol heptakisphosphate (IP7) kinase; generation of high energy inositol pyrophosphates by Kcs1p is required for many processes such as vacuolar biogenesis, stress response and telomere maintenance		0.034823	0.156223	-0.0343425	-0.155572	0.0066848	0.050884	0.212719	-0.365066	0.154125	0.125505	-0.187015	-0.025885	0.129855
YDR019C	GCV1	851582	4	T subunit of the mitochondrial glycine decarboxylase complex, required for the catabolism of glycine to 5,10-methylene-THF; expression is regulated by levels of levels of 5,10-methylene-THF in the cytoplasm	glycine cleavage complex	0.205724	-0.03979	-0.595897	1.36349	-0.318866	0.249363	-1.57591	1.30595	-0.387933	-1.00923	1.81724	0.510922	0.26186
YDR020C	DAS2	851583	4	Putative protein of unknown function; non-essential gene identified in a screen for mutants with increased levels of rDNA transcription; weak similarity with uridine kinases and with phosphoribokinases		0.0014998	-0.058675	-0.11742	0.061073	-0.0373856	-0.187335	0.107664	-0.0005355	-0.284618	-0.133527	-0.045913	-0.074773	-0.0686655
YDR021W	FAL1	851584	4	Nucleolar protein required for maturation of 18S rRNA, member of the eIF4A subfamily of DEAD-box ATP-dependent RNA helicases		-0.0183728	-0.010083	-0.113889	0.146988		-0.131372	0.014551	-0.0392675	0.112138	0.107317	-0.713679	-0.123521	-0.162498
YDR023W	SES1	851587	4	Cytosolic seryl-tRNA synthetase, class II aminoacyl-tRNA synthetase that aminoacylates tRNA(Ser), displays tRNA-dependent amino acid recognition which enhances discrimination of the serine substrate, interacts with peroxin Pex21p		0.0602783	-0.252231	-0.0576905	-0.11036	-0.144109	-0.293112	-0.20433	0.0148135	0.235431	-0.264527	-0.101173	-0.395216	-0.112123
YDR025W	RPS11A	851589	4	Protein component of the small (40S) ribosomal subunit; identical to Rps11Bp and has similarity to E. coli S17 and rat S11 ribosomal proteins	cytoplasmic ribosomal small subunit	0.006022	-0.022798	0.018588	-0.276894	-0.0073857	-0.0580565	0.08232	0.129008	-0.026236	-0.117594	-0.268611	-0.445577	-0.157295
YDR026C	YDR026C	851590	4	Protein of unknown function that may interact with ribosomes, based on co-purification experiments; Myb-like DNA-binding protein that may bind to the Ter region of rDNA; interacts physically with Fob1p		0.105146	-0.318601	-0.204711	0.697544	-0.0299908	-0.152729	-0.182211		-0.122977	-0.51954	0.022543	-0.656038	0.145335
YDR027C	VPS54	851591	4	Component of the GARP (Golgi-associated retrograde protein) complex, Vps51p-Vps52p-Vps53p-Vps54p, which is required for the recycling of proteins from endosomes to the late Golgi; potentially phosphorylated by Cdc28p	GARP complex	-0.10597	0.064674	-0.0245445	-0.076726	-0.0125896	-0.053705		-0.267871	0.112398	-0.117666	-0.137284	-0.013899	-0.22124
YDR028C	REG1	851592	4	Regulatory subunit of type 1 protein phosphatase Glc7p, involved in negative regulation of glucose-repressible genes	Reg1p/Glc7p complex	-0.0038326	0.057353	-0.0694957	0.05119	0.0678995	0.149453	-0.079446	-0.11344	0.0872019	0.191979	0.310486	0.193407	-0.0852065
YDR031W	MIC14	851595	4	Mitochondrial intermembrane space protein, required for normal oxygen consumption; contains twin cysteine-x9-cysteine motifs		-0.0355904	0.187308	0.247677	-0.425882	0.0144364	1.65329	-0.229425	0.521513	0.283736	0.477333	0.229164	1.09212	-0.0166005
YDR032C	PST2	851596	4	Protein with similarity to members of a family of flavodoxin-like proteins; induced by oxidative stress in a Yap1p dependent manner; the authentic, non-tagged protein is detected in highly purified mitochondria in high-throughput studies		-0.155495	-0.028724	-0.0362385	-0.261984	0.0382028	0.207615	-0.010826	-0.146369	0.354231	0.159471	0.292636	0.74032	-0.165756
YDR033W	MRH1	851597	4	Protein that localizes primarily to the plasma membrane, also found at the nuclear envelope; the authentic, non-tagged protein is detected in mitochondria in a phosphorylated state; has similarity to Hsp30p and Yro2p		0.0073862	-0.021785	0.148595	-1.19667	-0.416482	-0.12459	-0.257606	-0.450815	-0.571456	0.142269	-1.7842	-0.165962	0.148951
YDR034C	LYS14	851598	4	Transcriptional activator involved in regulation of genes of the lysine biosynthesis pathway; requires 2-aminoadipate semialdehyde as co-inducer		0.261252	0.360389	-0.150028	-0.163153	-0.446021	0.330376	0.112953	-0.142646	-0.204136	-0.000921	0.443353	-0.237918	-0.0212695
YDR035W	ARO3	851605	4	3-deoxy-D-arabino-heptulosonate-7-phosphate (DAHP) synthase, catalyzes the first step in aromatic amino acid biosynthesis and is feedback-inhibited by phenylalanine or high concentration of tyrosine or tryptophan		0.471059	0.108835	-0.0001705	0.392264	-0.617414	-0.099799	-0.602326	0.751996	0.15434	-0.542938	0.639858	-0.699002	-0.405857
YDR036C	EHD3	851606	4	3-hydroxyisobutyryl-CoA hydrolase, member of a family of enoyl-CoA hydratase/isomerases; non-tagged protein is detected in highly purified mitochondria in high-throughput studies; phosphorylated; mutation affects fluid-phase endocytosis		-0.252802	0.379421	-0.0381545	0.026447	0.328002	0.49512	0.312082	0.455682	-0.47142	0.018581	-0.040699	0.370819	0.147608
YDR037W	KRS1	851607	4	Lysyl-tRNA synthetase		0.204807	-0.12387	-0.0051145	0.268151	-0.172539	-0.190014	-0.097953	0.218503	0.250753	-0.422711	0.169188	-0.597281	-0.296295
YDR038C	ENA5	851608	4	Protein with similarity to P-type ATPase sodium pumps, member of the Na+ efflux ATPase family		-0.176173	0.384677	-0.348789	-0.171964	1.30582	0.395159	1.39509	-0.0608315	0.967894	1.06959	1.58811	-0.288892	-0.602108
YDR039C	ENA2	851609	4	P-type ATPase sodium pump, involved in Na+ efflux to allow salt tolerance; likely not involved in Li+ efflux		0.0073212	0.024115	-0.348789	-0.122911	1.30582	0.395159	1.39509	-0.0608315	0.967894	1.06959	1.58811	-0.288892	-0.602108
YDR040C	ENA1	851610	4	P-type ATPase sodium pump, involved in Na+ and Li+ efflux to allow salt tolerance		-0.1725	0.582323	-0.353072	-0.192252	1.31012	0.17991	1.39328	-0.296226	1.48359	1.06365	1.59803	-0.289258	-0.470429
YDR041W	RSM10	851611	4	Mitochondrial ribosomal protein of the small subunit, has similarity to E. coli S10 ribosomal protein; essential for viability, unlike most other mitoribosomal proteins	mitochondrial ribosomal small subunit	0.0528433	0.270817	0.0444265	0.252809	0.227341	0.402909	0.109248	1.1274	-0.115371	0.61016	0.215234	0.663934	-0.0944245
YDR044W	HEM13	851614	4	Coproporphyrinogen III oxidase, an oxygen requiring enzyme that catalyzes the sixth step in the heme biosynthetic pathway; transcription is repressed by oxygen and heme (via Rox1p and Hap1p)		0.209014	-0.380086	-0.4442	-0.056074	0.224106	-0.227083	-0.085731	0.751486	0.240935	-0.764171	0.253814	0.26123	-0.450791
YDR047W	HEM12	851617	4	Uroporphyrinogen decarboxylase, catalyzes the fifth step in the heme biosynthetic pathway; localizes to both the cytoplasm and nucleus; a hem12 mutant has phenotypes similar to patients with porphyria cutanea tarda		-0.0841292	-0.183933	-0.331599	-0.137927	-0.137186	-0.108462	-0.133504	0.0148565	-0.341283	-0.224647	0.052828	-0.083198	0.172041
YDR049W	YDR049W	851618	4	Zinc finger protein; putative transcription factor that may interact with proteins involved in histone acetylation or deacetylation; may be involved in altering acetylation on histone lysines		0.010525	-0.227985	-0.0523405	0.090076	-0.100087	-0.056523	0.0995886	-0.0827435	0.151253	-0.066673	0.037491	-0.095354	0.0379025
YDR050C	TPI1	851620	4	Triose phosphate isomerase, abundant glycolytic enzyme; mRNA half-life is regulated by iron availability; transcription is controlled by activators Reb1p, Gcr1p, and Rap1p through binding sites in the 5' non-coding region		0.0327607	-0.247869	-0.272964	-0.353232	-0.185342	-0.087857	-0.265256	-0.41192	-0.0380274	-0.394394	-0.305987	-0.507146	-0.29549
YDR051C	DET1	851621	4	Acid phosphatase involved in the non-vesicular transport of sterols in both directions between the endoplasmic reticulum and plasma membrane; deletion confers sensitivity to nickel		-0.02109	0.066514	-0.0914588	-0.068938	-0.181443	-0.003066	0.116333	-0.155484	-0.022579	-0.068264	-0.170582	0.017364
YDR052C	DBF4	851623	4	Regulatory subunit of Cdc7p-Dbf4p kinase complex, required for Cdc7p kinase activity and initiation of DNA replication; phosphorylates the Mcm2-7 family of proteins; cell cycle regulated	Cdc7p/Dbf4p complex		-0.053179	-0.0584745						0.0613859				0.0374575
YDR054C	CDC34	851624	4	Ubiquitin-conjugating enzyme (E2) and catalytic subunit of SCF ubiquitin-protein ligase complex (together with Skp1p, Rbx1p, Cdc53p, and an F-box protein) that regulates cell cycle progression by targeting key substrates for degradation	SCF-CDC4 complex	0.0827863	-0.086488	0.0096495	-0.292337	0.0480527	-0.004652		-0.192438	-0.492426	0.112421	-0.308671	0.036034	-0.0457395
YDR055W	PST1	851625	4	Cell wall protein that contains a putative GPI-attachment site; secreted by regenerating protoplasts; up-regulated by activation of the cell integrity pathway, as mediated by Rlm1p; upregulated by cell wall damage via disruption of FKS1		-0.159611	-0.122846	0.0163655	-0.714423	-0.114485	0.420109	-0.198767	-0.642603	-0.582564	0.29141	-0.305855	0.506573	0.912473
YDR056C	YDR056C	851626	4	Putative protein of unknown function; green fluorescent protein (GFP)-fusion protein localizes to the endoplasmic reticulum; YDR056C is not an essential protein		-0.101608	0.067959	-0.328422	0.225847	0.245949	0.029209	0.445157	-0.290847	-0.0572796	-0.049984	0.116608	-0.078516	-0.0809055
YDR057W	YOS9	851627	4	ER quality-control lectin; integral subunit of the HRD ligase; binds to glycans with terminal alpha-1,6 linked mannose on misfolded N-glycosylated proteins and participates in targeting proteins to ERAD; member of the OS-9 protein family	ubiquitin ligase ERAD-L complex|luminal surveillance complex	-0.198785	-0.112254	-0.270491	-0.156936	0.311488	0.28078	0.24323	0.137737	0.363256	0.215464	0.300566	0.486941	0.0344715
YDR059C	UBC5	851631	4	Ubiquitin-conjugating enzyme that mediates selective degradation of short-lived, abnormal, or excess proteins, including histone H3; central component of the cellular stress response; expression is heat inducible		-0.254141	0.683776	0.149537	0.106062	0.238424	1.14581	0.692854	-0.275829	0.477089	0.1301	0.200451	0.797006	-0.150728
YDR060W	MAK21	851632	4	Constituent of 66S pre-ribosomal particles, required for large (60S) ribosomal subunit biogenesis; involved in nuclear export of pre-ribosomes; required for maintenance of dsRNA virus; homolog of human CAATT-binding protein	Noc1p/Noc2p complex	0.0226107	0.004543	0.0210905	-0.021437	-0.038503	-0.052983	0.104791	0.0248105	0.164166	-0.030454	-0.208303	-0.271473	0.0036335
YDR061W	YDR061W	851633	4	Protein with similarity to ATP-binding cassette (ABC) transporter family members; lacks predicted membrane-spanning regions; transcriptionally activated by Yrm1p along with genes involved in multidrug resistance		-0.0223892	0.073029	-0.0210985	0.238131	-0.0193955	0.198235	0.0564358	0.133248	-0.289753	0.169059	-0.074434	0.437093	-0.100082
YDR062W	LCB2	851634	4	Component of serine palmitoyltransferase, responsible along with Lcb1p for the first committed step in sphingolipid synthesis, which is the condensation of serine with palmitoyl-CoA to form 3-ketosphinganine	serine C-palmitoyltransferase complex	-0.0066766	0.01492	-0.122354	-0.085317	0.115796	0.13964	0.129542	-0.0357055	0.13465	0.213281	-0.127344	0.053519	0.0077125
YDR063W	AIM7	851635	4	Protein that interacts with Arp2/3 complex to stimulate actin filament debranching and inhibit actin nucleation; has similarity to Cof1p and also to human glia maturation factor (GMF); null mutant displays elevated mitochondrial genome loss		0.225828	-0.156695	0.371529	-0.468433	-0.277501	0.023989	0.106134	-0.106304	-0.139235	0.135468		0.261444	-0.347816
YDR064W	RPS13	851636	4	Protein component of the small (40S) ribosomal subunit; has similarity to E. coli S15 and rat S13 ribosomal proteins	cytoplasmic ribosomal small subunit	0.0008884	-0.066993	-0.0451955	-0.269658	0.0011696	-0.053884	0.101399	0.135807	-0.0165415	-0.12796	-0.234471	-0.419973	-0.193484
YDR067C	OCA6	851639	4	Cytoplasmic protein required for replication of Brome mosaic virus in S. cerevisiae, which is a model system for studying positive-strand RNA virus replication; null mutation confers sensitivity to tunicamycin and DTT	OCA complex	0.0536673	-0.055347	0.159919	-0.120501	-0.659801	-0.017863	-0.251195	-0.0209905	0.208802	0.043076	-0.154183	0.123442	0.188683
YDR068W	DOS2	851640	4	Protein of unknown function, green fluorescent protein (GFP)-fusion protein localizes to the cytoplasm		0.0422223	-0.146751	0.0084635	0.05852	-0.0938108	-0.225192	-0.168035	-0.0264185	0.125749	-0.217493	0.522291	0.351714	0.0686565
YDR069C	DOA4	851641	4	Ubiquitin isopeptidase, required for recycling ubiquitin from proteasome-bound ubiquitinated intermediates, acts at the late endosome/prevacuolar compartment to recover ubiquitin from ubiquitinated membrane proteins en route to the vacuole		-0.14054	0.088723	-0.072392	-0.231043		-0.051321	0.165217	-0.116622	0.197279	0.001526	-0.292971	0.049615	-0.0347365
YDR070C	FMP16	851642	4	Putative protein of unknown function; proposed to be involved in responding to conditions of stress; the authentic, non-tagged protein is detected in highly purified mitochondria in high-throughput studies		-0.898225	2.29233	-1.53136	-1.34802		0.312953	2.4686		1.727	2.87198	-2.65683	-0.883018	-1.96337
YDR071C	PAA1	851643	4	Polyamine acetyltransferase; acetylates polyamines (e.g. putrescine, spermidine, spermine) and also aralkylamines (e.g. tryptamine, phenylethylamine); may be involved in transcription and/or DNA replication		0.0348798	-0.0748	0.176092	0.284613	0.0059	0.0711	-0.068366	0.0683225	-0.005294	-0.04107	0.169729	0.141933	0.0702265
YDR074W	TPS2	851646	4	Phosphatase subunit of the trehalose-6-phosphate synthase/phosphatase complex, which synthesizes the storage carbohydrate trehalose; expression is induced by stress conditions and repressed by the Ras-cAMP pathway	alpha,alpha-trehalose-phosphate synthase complex (UDP-forming)	-0.341885	0.441076	-0.105526	-0.428488	0.187749	0.493511	0.160308	-0.415246	0.157026	1.22369	-0.366622	0.261607	-0.286775
YDR075W	PPH3	851647	4	Catalytic subunit of an evolutionarily conserved protein phosphatase complex containing Psy2p and the regulatory subunit Psy4p; required for cisplatin resistance; involved in activation of Gln3p	histone H2A phosphatase complex	-0.115991	-0.16403	0.225637	0.868654	-0.0672958	-0.097913	0.302894	0.0626435	-0.384413	0.050368	0.834978	0.134162	-0.255187
YDR077W	SED1	851649	4	Major stress-induced structural GPI-cell wall glycoprotein in stationary-phase cells, associates with translating ribosomes, possible role in mitochondrial genome maintenance; ORF contains two distinct variable minisatellites		-0.649403	0.30982	0.33722	-1.35669	1.25797	1.01094	0.243825	0.246609	1.18161	0.82036	0.428146	1.06075	0.184618
YDR079C-A	TFB5	851652	4	Component of the RNA polymerase II general transcription and DNA repair factor TFIIH; involved in transcription initiation and in nucleotide-excision repair; homolog of Chlamydomonas reinhardtii REX1-S protein involved in DNA repair	transcription factor TFIIH complex	0.0407563	-0.35535	-0.084952	0.069094	0.154057	0.099285		0.453029	-0.676684	-0.543301		0.0975149	1.01485
YDR079W	PET100	851651	4	Chaperone that specifically facilitates the assembly of cytochrome c oxidase, integral to the mitochondrial inner membrane; interacts with a subcomplex of subunits VII, VIIa, and VIII (Cox7p, Cox9p, and Cox8p) but not with the holoenzyme			0.348081	0.309677	0.190586	-0.10785	0.206056		0.926446	-1.03301	0.587393	-0.394744	0.540704	-0.818277
YDR080W	VPS41	851653	4	Vacuolar membrane protein that is a subunit of the homotypic vacuole fusion and vacuole protein sorting (HOPS) complex; essential for membrane docking and fusion at the Golgi-to-endosome and endosome-to-vacuole stages of protein transport	HOPS complex	-0.0487842	-0.045181	0.583573	0.921644	0.188648		-0.035354	0.0266485	0.0982909	0.0842459	0.237659	0.063286	-0.0017405
YDR081C	PDC2	851654	4	Transcription factor required for the synthesis of the glycolytic enzyme pyruvate decarboxylase, required for high level expression of both the THI and the PDC genes		-0.0265546	-0.143526	-0.204827	-0.029537	-0.107886	-0.131538	0.0953412	0.115584	0.305517	-0.06531	-0.129313	-0.079413	0.0726055
YDR083W	RRP8	851656	4	Nucleolar protein involved in rRNA processing, pre-rRNA cleavage at site A2; also involved in telomere maintenance; mutation is synthetically lethal with a gar1 mutation		0.119191	-0.029718	-0.0660235	-0.046658	-0.0550468	-0.174265	-0.005677	0.191663	-0.145579	0.0952861	-0.030978	-0.360658	0.0087305
YDR087C	RRP1	851660	4	Essential evolutionarily conserved nucleolar protein necessary for biogenesis of 60S ribosomal subunits and processing of pre-rRNAs to mature rRNAs, associated with several distinct 66S pre-ribosomal particles		0.0724373	-0.043661	-0.0006235	-0.031752	-0.11787	-0.143439	0.0567767	0.0237285	0.022965	0.111709	-0.180542	-0.279549	0.0460455
YDR088C	SLU7	851661	4	RNA splicing factor, required for ATP-independent portion of 2nd catalytic step of spliceosomal RNA splicing; interacts with Prp18p; contains zinc knuckle domain		0.0314147	-0.078456	0.0685295	-0.04469	0.336745	-0.277024	0.256134		0.0795379	-0.186143	0.282891	0.176327	0.212424
YDR089W	YDR089W	851663	4	Protein of unknown function; deletion confers resistance to Nickel		-0.122082	0.164997	-0.229957	0.289847	0.134008	-0.098307	0.252457	0.104584	0.154356	-0.153222	-0.093388	0.052514	-0.157183
YDR091C	RLI1	851665	4	Essential iron-sulfur protein required for ribosome biogenesis and translation initiation and termination; facilitates binding of a multifactor complex (MFC) of initiation factors to the small ribosomal subunit; predicted ABC family ATPase		0.135438	-0.18481	0.202622	-0.239107	-0.310482	-0.166871	-0.173377	0.185281	-0.127932	-0.140674	-0.242045	-0.149002	0.106022
YDR093W	DNF2	851667	4	Aminophospholipid translocase (flippase) that localizes primarily to the plasma membrane; contributes to endocytosis, protein transport and cell polarity; type 4 P-type ATPase		-0.0147824	-0.106916	-0.423334	-0.107582	-0.0025236	-0.264036	0.10009	-0.154365	0.239157	-0.307835	-0.446669	-0.102169	-0.0972035
YDR096W	GIS1	851670	4	JmjC domain-containing histone demethylase; transcription factor involved in expression of genes during nutrient limitation and in negative regulation of DPP1 and PHR1; activity is modulated by limited proteasome-mediated proteolysis		-0.13608	0.073432	0.0395395	-0.435987		0.173908	-0.063552	0.26206	0.0824669	0.548501	0.219824	0.312484	0.0089155
YDR097C	MSH6	851671	4	Protein required for mismatch repair in mitosis and meiosis, forms a complex with Msh2p to repair both single-base & insertion-deletion mispairs; potentially phosphorylated by Cdc28p	MSH2p/MSH6p complex	-0.0282999	0.05256	-0.0213525	-0.285958	0.0168203	0.009931	0.34993	0.169172	-0.0653254	-0.177233	-0.013937	0.389401	-0.0838245
YDR098C	GRX3	851672	4	Hydroperoxide and superoxide-radical responsive glutathione-dependent oxidoreductase; monothiol glutaredoxin subfamily member along with Grx4p and Grx5p; protects cells from oxidative damage		0.100363	-0.196977	0.180712	-0.153261	0.255193	-0.473207	-0.461831	-0.258169	0.42246	-0.167856	0.055275	-0.202169	-0.242057
YDR099W	BMH2	851676	4	14-3-3 protein, minor isoform; controls proteome at post-transcriptional level, binds proteins and DNA, involved in regulation of many processes including exocytosis, vesicle transport, Ras/MAPK signaling, and rapamycin-sensitive signaling		-0.0413338	-0.014073	0.0605655	-0.029426	-0.122221	-0.049048	-0.110163	0.0179395	0.348397	-0.012088	0.088415	0.000922	-0.129189
YDR101C	ARX1	851678	4	Shuttling pre-60S factor; involved in the biogenesis of ribosomal large subunit biogenesis; interacts directly with Alb1; responsible for Tif6 recycling defects in absence of Rei1; associated with the ribosomal export complex		0.0573883	-0.068239	0.117545	0.04558	0.0588372	-0.054418	0.011632	0.15477	0.0811369	0.02573	-0.271142	-0.427123	-0.0038105
YDR103W	STE5	851680	4	Pheromone-response scaffold protein that controls the mating decision; binds Ste11p, Ste7p, and Fus3p kinases, forming a MAPK cascade complex that interacts with the plasma membrane and Ste4p-Ste18p; allosteric activator of Fus3p	STE5-MAPK complex	0.120461	-0.329322	-0.361393	-0.151999		-0.104884	0.0662235	-0.0006485	-0.171344	-0.166791	-0.347248	-0.183587	-0.143184
YDR108W	GSG1	851686	4	Subunit of TRAPPIII (transport protein particle), a multimeric guanine nucleotide-exchange factor for Ypt1p, required for membrane expansion during autophagy and the CVT pathway; directs Ypt1p to the PAS; late post-replication meiotic role	TRAPP complex	0.0128241	-0.327241	-0.0394385	0.436075	0.0074772	0.00238	0.0862464	-0.471305	0.0209867	0.072621	0.097071	-0.045681	0.0062155
YDR109C	YDR109C	851687	4	Putative kinase		-0.0339873	-0.024258	-0.42993	-0.040975	-0.335779	0.011615	-0.102202	-0.402606	0.149512	-0.008627	0.407429	0.471641	0.125353
YDR110W	FOB1	851688	4	Nucleolar protein that binds the rDNA replication fork barrier (RFB) site; required for replication fork blocking, recombinational hotspot activity, condensin recruitment to RFB and rDNA repeat segregation; related to retroviral integrases			0.01055	-0.118128	-0.93607	-0.0190606	-0.053492	-0.134253		-0.295604	-0.168642	0.341041	-0.173804	-0.0324845
YDR111C	ALT2	851690	4	Putative alanine transaminase (glutamic pyruvic transaminase)		0.181932		-0.220513	0.120735		0.045676	0.283566		-0.358384	0.379456	-0.296314		0.921013
YDR113C	PDS1	851691	4	Securin, inhibits anaphase by binding separin Esp1p; blocks cyclin destruction and mitotic exit, essential for meiotic progression and mitotic cell cycle arrest; localization is cell-cycle dependent and regulated by Cdc28p phosphorylation	Esp1p/Pds1p complex			0.225635	-0.029216	-0.5759		0.0583972	-0.445487	0.0790359	0.050717		-0.745023	0.171331
YDR116C	MRPL1	851694	4	Mitochondrial ribosomal protein of the large subunit	mitochondrial ribosomal large subunit	-0.0942211	0.210241	0.189175	0.070503	-0.134991	0.343854	-0.144736	1.01655	-0.478743	0.497998	0.088927	0.665714	0.164437
YDR117C	TMA64	851695	4	Protein of unknown function that associates with ribosomes; has a putative RNA binding domain; in mammals the corresponding protein, eIF2D, has been shown to possess translation initiation factor activity		-0.0134182	0.085138	-0.149332	0.185942	-0.0454381	0.014914	-0.015494	-0.0773635	-0.0995705	-0.06407	-0.001026	0.106445	-0.0326345
YDR118W	APC4	851696	4	Subunit of the Anaphase-Promoting Complex/Cyclosome (APC/C), which is a ubiquitin-protein ligase required for degradation of anaphase inhibitors, including mitotic cyclins, during the metaphase/anaphase transition	anaphase-promoting complex	0.592497	-0.327322	0.32884	0.021836		-0.38686	-0.332653		-0.240527				0.553721
YDR119W	VBA4	851697	4	Protein of unknown function with proposed role as a basic amino acid permease based on phylogeny; GFP-fusion protein localizes to vacuolar membrane; physical interaction with Atg27p suggests a possible role in autophagy; non-essential gene		0.235501	-0.266405	0.0294185	0.303139	-0.870604	-0.415343	0.0828125	0.34289	-0.257947	-0.282472	0.360331	0.024516	0.104277
YDR120C	TRM1	851698	4	tRNA methyltransferase; two forms of the protein are made by alternative translation starts; localizes to both the nucleus and mitochondrion to produce the modified base N2,N2-dimethylguanosine in tRNAs in both compartments		0.13492	-0.001694	-0.0024715	0.186277	-0.0250406	-0.089782	-0.037693	0.290575	-0.147593	-0.135165	0.253221	-0.273141	0.0616465
YDR121W	DPB4	851699	4	Shared subunit of DNA polymerase (II) epsilon and of ISW2/yCHRAC chromatin accessibility complex; involved in both chromosomal DNA replication and in inheritance of telomeric silencing	chromatin accessibility complex|DNA polymerase epsilon complex	0.152086	0.013887	0.23461	0.160797	-0.125823	-0.069786	0.260447	-0.133314	-0.105353	-0.145427	0.033703	0.213416	0.0595095
YDR122W	KIN1	851700	4	Serine/threonine protein kinase involved in regulation of exocytosis; localizes to the cytoplasmic face of the plasma membrane; closely related to Kin2p		-0.144589	0.2753	0.0789355	0.034368	0.0986563	0.228922	0.107065	-0.315422	-0.213947	0.414192	0.009082	0.320571	0.159282
YDR123C	INO2	851701	4	Component of the heteromeric Ino2p/Ino4p basic helix-loop-helix transcription activator that binds inositol/choline-responsive elements (ICREs), required for derepression of phospholipid biosynthetic genes in response to inositol depletion	Ino2p/Ino4p basic helix-loop-helix heteromeric complex		-0.037524	-0.0042905		-0.197371	-0.130351	-0.427815	-0.441898	-0.205326	0.13382		-0.06245	0.0634815
YDR127W	ARO1	851705	4	Pentafunctional arom protein, catalyzes steps 2 through 6 in the biosynthesis of chorismate, which is a precursor to aromatic amino acids		0.201323	0.237787	-0.0777284	0.085862	-0.142861	0.086579	-0.099999	0.206889	-0.154696	-0.232133	0.740268	-0.268339	0.0505285
YDR128W	MTC5	851706	4	Protein of unknown function; mtc5 is synthetically sick with cdc13-1		-0.0984272	-0.191564	0.157878			-0.020862	0.173495	0.280022	-0.29889	0.020016	-0.241463	-0.04386	0.0062665
YDR129C	SAC6	851707	4	Fimbrin, actin-bundling protein; cooperates with Scp1p (calponin/transgelin) in the organization and maintenance of the actin cytoskeleton		-0.0777374	0.134218	-0.16635	0.023179	0.0824599	0.151022	-0.237234	-0.282924	0.350819	0.148147	0.303153	-0.068682	-0.112301
YDR131C	YDR131C	851709	4	F-box protein, substrate-specific adaptor subunit that recruits substrates to a core ubiquitination complex			0.159356		0.390752	0.274827	0.163397	0.122274		-0.119404	0.037968		-0.014148	-0.214533
YDR135C	YCF1	851713	4	Vacuolar glutathione S-conjugate transporter of the ATP-binding cassette family, has a role in detoxifying metals such as cadmium, mercury, and arsenite; also transports unconjugated bilirubin; similar to human cystic fibrosis protein CFTR		-0.0570697	-0.02907	-0.11181	0.102566	0.25195	0.207733	0.398314	-0.163197	-0.178182	0.534071	0.445881	-0.190294	-0.108647
YDR137W	RGP1	851714	4	Subunit of a Golgi membrane exchange factor (Ric1p-Rgp1p) that catalyzes nucleotide exchange on Ypt6p	guanyl-nucleotide exchange factor complex	0.169412	-0.055092	0.0614975	0.082768	-0.119824	0.01807	-0.116823		0.263522	-0.133726	-0.094012	0.128291
YDR138W	HPR1	851716	4	Subunit of THO/TREX complexes that couple transcription elongation with mitotic recombination and with mRNA metabolism and export, subunit of an RNA Pol II complex; regulates lifespan; involved in telomere maintenance; similar to Top1p	THO complex|Cdc73p/Paf1p complex	0.0755743	-0.116345	0.132111	0.254092	0.0721217	-0.082759	0.117427	-0.119784	-0.0810687	-0.035125	0.223387	-0.033743	0.0442625
YDR140W	MTQ2	851718	4	S-adenosylmethionine-dependent methyltransferase of the seven beta-strand family; subunit of complex with Trm112p that methylates translation release factor Sup45p (eRF1) in the ternary complex eRF1-eRF3-GTP; similar to E.coli PrmC		0.16673							0.172251	0.209494	1.31995		0.458192	-0.224742
YDR141C	DOP1	851719	4	Golgi-localized, leucine-zipper domain containing protein; involved in endosome to Golgi transport, organization of the ER, establishing cell polarity, and morphogenesis; detected in highly purified mitochondria in high-throughput studies	Dop1p/Mon2p complex	-0.0475119	0.025585	-0.0214595	0.272831	0.0891968	0.075899	0.113016	-0.241045	0.108533	-0.071134	-0.039632	0.036792	-0.134443
YDR142C	PEX7	851720	4	Peroxisomal signal receptor for the N-terminal nonapeptide signal (PTS2) of peroxisomal matrix proteins; WD repeat protein; defects in human homolog cause lethal rhizomelic chondrodysplasia punctata (RCDP)		-0.103714		-0.190439	-1.22838					-0.0845001	-0.33851	-0.083043	-0.068507	0.0288995
YDR143C	SAN1	851721	4	Ubiquitin-protein ligase, involved in the proteasome-dependent degradation of aberrant nuclear proteins; contains intrinsically disordered regions that contribute to substrate recognition		0.0975463	-0.089888	-0.0029385	0.154561	0.710416	-0.474155	-0.003239	0.4176	0.103899	-0.308658	0.311531	0.530565	-0.187529
YDR144C	MKC7	851722	4	GPI-anchored aspartyl protease, member of the yapsin family of proteases involved in cell wall growth and maintenance; shares functions with Yap3p and Kex2p		-0.0801944	-0.334162	0.18531	-0.32428	0.109838	-0.121749	0.192025	0.345832	-0.0450097	-0.213717	0.106486	-0.085629	0.356651
YDR145W	TAF12	851723	4	Subunit (61/68 kDa) of TFIID and SAGA complexes, involved in RNA polymerase II transcription initiation and in chromatin modification, similar to histone H2A	transcription factor TFIID complex|SAGA complex|SLIK (SAGA-like) complex	-0.0172181	0.070529	0.0510875	0.022254	0.0236706	-0.102431	-0.054467	-0.135967	-0.147064	0.103758	0.116639	0.030237	0.229238
YDR146C	SWI5	851724	4	Transcription factor that activates transcription of genes expressed at the M/G1 phase boundary and in G1 phase; localization to the nucleus occurs during G1 and appears to be regulated by phosphorylation by Cdc28p kinase		-0.0655921	0.158635		-1.42813			-0.271522	0.372972	-0.0877616	-0.240628	0.490879	-0.009235	-0.0579275
YDR147W	EKI1	851725	4	Ethanolamine kinase, primarily responsible for phosphatidylethanolamine synthesis via the CDP-ethanolamine pathway; exhibits some choline kinase activity, thus contributing to phosphatidylcholine synthesis via the CDP-choline pathway		-0.0357548	-0.161824	-0.474529		-0.299104	0.047023	0.098097	0.163556	0.0501749	-0.193	-0.251532	-0.338409	0.23836
YDR148C	KGD2	851726	4	Dihydrolipoyl transsuccinylase, component of the mitochondrial alpha-ketoglutarate dehydrogenase complex, which catalyzes the oxidative decarboxylation of alpha-ketoglutarate to succinyl-CoA in the TCA cycle; phosphorylated	mitochondrial oxoglutarate dehydrogenase complex	-0.0362074	0.505326	-0.0601405	-0.350318	0.0509247	0.340594	0.119472	0.178142	-0.416451	0.404723	-0.337993	0.478781	-0.29781
YDR150W	NUM1	851727	4	Protein required for nuclear migration, localizes to the mother cell cortex and the bud tip; may mediate interactions of dynein and cytoplasmic microtubules with the cell cortex		-0.0345992	0.062105	0.0058045	-0.001024	0.255369	0.043474	0.329494	0.196786	-0.0060911	-0.020819	0.018113	0.23989	0.0849005
YDR151C	CTH1	851729	4	Member of the CCCH zinc finger family; has similarity to mammalian Tis11 protein, which activates transcription and also has a role in mRNA degradation; may function with Tis11p in iron homeostasis				0.0481585						0.271724		0.848828		-1.18109
YDR152W	GIR2	851730	4	Highly-acidic cytoplasmic RWD domain-containing protein of unknown function; forms a complex with Rbg2p; interacts with Rbg1p and Gcn1p; associates with translating ribosomes; putative intrinsically unstructured protein		0.005281	-0.216132	-0.0700076	-0.161028	-0.0953378	-0.282271	-0.111122	-0.25863	0.245525	-0.27109	0.138248	-0.359833	-0.144061
YDR153C	ENT5	851731	4	Protein containing an N-terminal epsin-like domain involved in clathrin recruitment and traffic between the Golgi and endosomes; associates with the clathrin adaptor Gga2p, clathrin adaptor complex AP-1, and clathrin		0.0310091	-0.09535	-0.177808	-0.374869	-0.0500326	-0.036823	-0.240336	-0.257737	0.15633	0.011494	-0.138045	-0.351472	-0.118233
YDR155C	CPR1	851733	4	Cytoplasmic peptidyl-prolyl cis-trans isomerase (cyclophilin), catalyzes the cis-trans isomerization of peptide bonds N-terminal to proline residues; binds the drug cyclosporin A	Set3p complex	-0.0230711	-0.040002	0.111934	-0.281727	0.49653	0.477092	0.359233	0.0241875	0.316448	0.609986	-0.236555	0.240412	0.0723505
YDR156W	RPA14	851734	4	RNA polymerase I subunit A14	DNA-directed RNA polymerase I complex	0.0717203	0.001548	0.120275	-0.165476	0.100246	-0.129741	-0.191242	0.118618	0.113897	-0.077395	-0.099612	0.335207	-0.0408265
YDR158W	HOM2	851736	4	Aspartic beta semi-aldehyde dehydrogenase, catalyzes the second step in the common pathway for methionine and threonine biosynthesis; expression regulated by Gcn4p and the general control of amino acid synthesis		0.494524	0.007369	-0.0366915	0.401262	-0.426022	-0.273157	-0.528091	0.756586	0.183059	-0.610606	0.566003	-0.726888	-0.388128
YDR159W	SAC3	851737	4	Nuclear pore-associated protein, required for biogenesis of the small ribosomal subunit; forms a complex with Thp1p that is involved in transcription and in mRNA export from the nucleus	Sac3p/Thp1p complex	0.445863	0.045591	0.294492	0.002156	0.131732	-0.426212	-0.014983	-0.0076285	-0.115587	-0.188463	-0.217168	-0.056729	0.126601
YDR161W	YDR161W	851739	4	Putative protein of unknown function; non-essential gene; proposed function in rRNA and ribosome biosynthesis based on transcriptional co-regulation; genetic interactions suggest a role in ER-associated protein degradation (ERAD)		0.106347	0.003367	-0.14818	0.182847	-0.0293618	-0.006751	0.227457	-0.134352	-0.0504376	-0.102953	-0.072258	-0.153727	-0.122073
YDR162C	NBP2	851740	4	Protein involved in the HOG (high osmolarity glycerol) pathway, negatively regulates Hog1p by recruitment of phosphatase Ptc1p the Pbs2p-Hog1p complex, found in the nucleus and cytoplasm, contains an SH3 domain that binds Pbs2p		0.471318	-0.024176	-0.366753	0.204868	0.0403441	-0.19471	-0.142705	-0.0523765	0.0712729	-0.167236	0.203082	0.179924	-0.183156
YDR163W	CWC15	851741	4	Non-essential protein involved in pre-mRNA splicing, component of a complex containing Cef1p; has similarity to S. pombe Cwf15p		-0.0158398	0.033961	0.0246935	0.043397	-0.0035872	-0.22891	-0.217754	0.106942	0.0263222	-0.149924	-0.068302	-0.005563	0.0251515
YDR164C	SEC1	851742	4	Sm-like protein involved in docking and fusion of exocytic vesicles through binding to assembled SNARE complexes at the membrane; localization to sites of secretion (bud neck and bud tip) is dependent on SNARE function		-0.012162	-0.126332	-0.0206645	0.278816	-0.114897	-0.035895	-0.118926	0.0294825	-0.0494872	-0.125908	0.463959	-0.108534	0.0726195
YDR165W	TRM82	851743	4	Subunit of a tRNA methyltransferase complex composed of Trm8p and Trm82p that catalyzes 7-methylguanosine modification of tRNA	tRNA Methyltransferase Complex	0.100307	-0.189364	0.0893305	-0.037823	-0.129969	-0.149266	-0.030408	0.132902	-0.0906256	-0.122777	-0.124457	-0.131087	-0.0699105
YDR166C	SEC5	851744	4	Essential 107kDa subunit of the exocyst complex (Sec3p, Sec5p, Sec6p, Sec8p, Sec10p, Sec15p, Exo70p, and Exo84p), which has the essential function of mediating polarized targeting of secretory vesicles to active sites of exocytosis	Exocyst complex	0.0142218	-0.018331	-0.0144945	0.195502	0.182073	0.010156	0.141552	-0.0361545	0.0433977	-0.140796	0.189257	0.02589	-0.0891345
YDR167W	TAF10	851745	4	Subunit (145 kDa) of TFIID and SAGA complexes, involved in RNA polymerase II transcription initiation and in chromatin modification	transcription factor TFIID complex|SAGA complex|SLIK (SAGA-like) complex	0.0967003	0.04331	0.102552	0.096325	-0.0931138	-0.097621	-0.149761	0.0194925	0.037108	0.0842966	0.046851	0.103345	0.0592235
YDR168W	CDC37	851746	4	Essential Hsp90p co-chaperone; necessary for passage through the START phase of the cell cycle; stabilizes protein kinase nascent chains and participates along with Hsp90p in their folding		0.0121126	-0.144597	-0.0454415	-0.030404	0.086067	0.014296	-0.140211	-0.133769	0.330908	-0.113262	0.28088	-0.031045	-0.142707
YDR169C	STB3	851747	4	Ribosomal RNA processing element (RRPE)-binding protein involved in the glucose-induced transition from quiescence to growth; restricted to nucleus in quiescent cells, released into cytoplasm after glucose repletion; binds Sin3p		-0.0008925	0.236534	-0.180895	-0.123582	-0.103016	0.084881	-0.241931	-0.424375	-0.146375	0.148956	-0.345015	-0.120723	-0.0470785
YDR170C	SEC7	851748	4	Guanine nucleotide exchange factor (GEF) for ADP ribosylation factors involved in proliferation of the Golgi, intra-Golgi transport and ER-to-Golgi transport; found in the cytoplasm and on Golgi-associated coated vesicles		0.0375633	-0.109464	-0.0645778	-0.102412	0.0478217	-0.147776	-0.096682	-0.303917	-0.402187	-0.151913	0.200876	-0.156418	-0.0887425
YDR171W	HSP42	851751	4	Small heat shock protein (sHSP) with chaperone activity; forms barrel-shaped oligomers that suppress unfolded protein aggregation; involved in cytoskeleton reorganization after heat shock		-0.538294	0.92931	0.0543865	-0.637932	1.11768	1.20122	0.881753	-0.670387	0.303612	1.41069	-0.402211	0.410418	-0.560387
YDR172W	SUP35	851752	4	Translation termination factor eRF3; altered protein conformation creates the [PSI(+)] prion, a dominant cytoplasmically inherited protein aggregate that alters translational fidelity and creates a nonsense suppressor phenotype	translation release factor complex	0.0619273	-0.095776	-0.0761803	-0.138013	-0.215116	-0.176597	-0.15133	-0.154273	0.133278	-0.085039	-0.10898	-0.328756	-0.180091
YDR173C	ARG82	851753	4	Inositol polyphosphate multikinase (IPMK), sequentially phosphorylates Ins(1,4,5)P3 to form Ins(1,3,4,5,6)P5; also has diphosphoinositol polyphosphate synthase activity; regulates arginine-, phosphate-, and nitrogen-responsive genes	ARGR complex	0.31966	-0.056857	0.148724	0.012775	-0.188325	-0.008435	0.146003		0.255967	0.003224		-0.017226
YDR174W	HMO1	851754	4	Chromatin associated high mobility group (HMG) family member involved in genome maintenance; rDNA-binding component of the Pol I transcription system; associates with a 5'-3' DNA helicase and Fpr1p, a prolyl isomerase		-0.0435097	0.19491	-0.0034405	-0.17724	-0.137697	0.192647	-0.150141	-0.0525615	0.0570629	0.222624	-0.21004	-0.340407	0.0091895
YDR175C	RSM24	851755	4	Mitochondrial ribosomal protein of the small subunit	mitochondrial ribosomal small subunit	0.0466973	0.217935	0.256311	0.120569	0.0084287	0.409973	-0.086939	0.835686	-0.451819	0.465056	0.102759	0.646543	0.0397235
YDR176W	NGG1	851756	4	Transcriptional regulator involved in glucose repression of Gal4p-regulated genes; component of transcriptional adaptor and histone acetyltransferase complexes, the ADA complex, the SAGA complex, and the SLIK complex	Ada2p/Gcn5p/Ada3 transcription activator complex|SAGA complex|SLIK (SAGA-like) complex	0.0639123	0.125252	-0.0127875	0.011485	-0.431035	-0.234467	0.006085	-0.414247	-0.0757996	0.116647	-0.1361	-0.085856	0.0728445
YDR177W	UBC1	851757	4	Ubiquitin-conjugating enzyme that mediates selective degradation of short-lived and abnormal proteins; plays a role in vesicle biogenesis and ER-associated protein degradation (ERAD); component of the cellular stress response		0.0135885	-0.087076	0.0262375	0.098063	0.059556	0.098105	-0.097197	0.136973	0.112261	0.048008	0.288622	0.307519	0.0376235
YDR180W	SCC2	851761	4	Subunit of cohesin loading factor (Scc2p-Scc4p), a complex required for loading of cohesin complexes onto chromosomes; involved in establishing sister chromatid cohesion during DSB repair via histone H2AX; evolutionarily-conserved adherin	cohesin loading factor complex	-0.0159137	-0.071477	0.0409655	-0.013323	0.396117	0.294071	0.0509784	-0.128711	-0.072457	0.11312	0.200331	0.373161	0.0183385
YDR181C	SAS4	851762	4	Subunit of the SAS complex (Sas2p, Sas4p, Sas5p), which acetylates free histones and nucleosomes and regulates transcriptional silencing; required for the HAT activity of Sas2p	SAS Complex	-0.0400076	0.031292	-0.467104	0.966424		-1.65156	-0.217597		-0.349885	0.051604	-0.114506	-0.057572	-0.0654485
YDR182W	CDC1	851763	4	Putative lipid phosphatase of the endoplasmic reticulum; shows Mn2+ dependence and may affect Ca2+ signaling; mutants display actin and general growth defects and pleiotropic defects in cell cycle progression and organelle distribution		0.101167	-0.065948	-0.145875	0.157682	-0.0285171	-0.112464	0.318132	0.234006	-0.183837	0.024565	-0.357082	-0.037287	-0.117078
YDR183W	PLP1	851764	4	Protein that interacts with CCT (chaperonin containing TCP-1) complex and has a role in actin and tubulin folding; has weak similarity to phosducins, which are G-protein regulators		0.0407453	-0.01674	0.0167275	0.227883	-0.0975468	0.100621	-0.235523	0.106255	0.132426	-0.166288	0.017738	-0.047668	0.0757155
YDR184C	ATC1	851765	4	Nuclear protein, possibly involved in regulation of cation stress responses and/or in the establishment of bipolar budding pattern		-0.404666	-0.2333	-0.0552685		-0.016874	0.012238	0.431055		0.527702	0.273187	-0.363911	-0.421674	0.235474
YDR186C	YDR186C	851767	4	Putative protein of unknown function; may interact with ribosomes, based on co-purification experiments; green fluorescent protein (GFP)-fusion protein localizes to the cytoplasm		0.0192149	0.236393	-0.110199	0.377925	0.510002	0.407835	0.165881	0.543691	0.261512	-0.104163	0.489769	0.559243	0.331412
YDR188W	CCT6	851768	4	Subunit of the cytosolic chaperonin Cct ring complex, related to Tcp1p, essential protein that is required for the assembly of actin and tubulins in vivo; contains an ATP-binding motif	chaperonin-containing T-complex	0.0158755	-0.029049	0.159291	-0.022584	0.0254994	0.013488	0.160161	0.0653825	0.0401741	0.021759	-0.069085	-0.277031	-0.0155815
YDR189W	SLY1	851770	4	Hydrophilic protein involved in vesicle trafficking between the ER and Golgi; SM (Sec1/Munc-18) family protein that binds the tSNARE Sed5p and stimulates its assembly into a trans-SNARE membrane-protein complex		-0.088857	0.042218	0.0837405	-0.121198	-0.0407357	-0.023168	0.050022	-0.239954	0.0155433	-0.020301	0.010492	-0.136494	0.0726055
YDR190C	RVB1	851771	4	Essential protein involved in transcription regulation; component of chromatin remodeling complexes; required for assembly and function of the INO80 complex; also referred to as pontin; member of the RUVB-like protein family	Ino80p complex|Swr1p complex	0.0623263	-0.174865	-0.0100955	0.01073	-0.0973988	-0.047616	-0.17283	-0.0960255	0.1701	-0.137066	0.018689	-0.093367	0.134939
YDR192C	NUP42	851774	4	Subunit of the nuclear pore complex (NPC) that localizes exclusively to the cytoplasmic side; involved in RNA export, most likely at a terminal step; interacts with Gle1p		-0.0415546	-0.094147	0.0204895	0.041179	0.0474712	-0.164816	0.0609146	-0.0909515	-0.0220311	-0.087747	0.121308	0.002316	-0.0368345
YDR194C	MSS116	851775	4	DEAD-box protein required for efficient splicing of mitochondrial Group I and II introns; non-polar RNA helicase that also facilities strand annealing		0.023784	0.111019	0.295739	-0.101408	0.047886	0.354972	0.049247	0.917385	-0.343256	0.380333	0.183602	0.391875	0.0408365
YDR195W	REF2	851776	4	RNA-binding protein involved in the cleavage step of mRNA 3'-end formation prior to polyadenylation, and in snoRNA maturation; part of holo-CPF subcomplex APT, which associates with 3'-ends of snoRNA- and mRNA-encoding genes	mRNA cleavage and polyadenylation specificity factor complex	0.0748373	0.017287	0.160367	0.257345	0.0417872	0.076156	0.001021	0.313223	0.235624	-0.099807	0.235576	0.187465	0.31047
YDR196C	CAB5	851777	4	Probable dephospho-CoA kinase (DPCK) that catalyzes the last step in coenzyme A biosynthesis; null mutant lethality is complemented by E. coli coaE (encoding DPCK); detected in purified mitochondria in high-throughput studies		0.0479433	-0.23387	0.267147	-0.200932	-0.208548	0.047671	0.044299	0.261099	-0.120645	-0.038221	0.047146	0.65589	-0.335994
YDR198C	RKM2	851779	4	Ribosomal protein lysine methyltransferase, responsible for trimethylation of the lysine residue at position 3 of Rpl12Ap and Rpl12Bp		-0.132056	0.294178	-0.0911959	-0.123675			-0.130614	-0.309782	0.376424
YDR200C	VPS64	851781	4	Protein required for cytoplasm to vacuole targeting of proteins; forms a complex with Far3p and Far7p to Far11p involved in recovery from pheromone-induced cell cycle arrest; mutant has increased aneuploidy tolerance	Far3p/Far7p/Far8p/Far9p/Far10p/Far11p complex	-0.0730018	0.00489	0.0796575	0.019441	0.058184	0.134405	-0.083408	0.0538055	-0.202598	-0.007626	-0.166981	0.23807	0.146013
YDR201W	SPC19	851782	4	Essential subunit of the Dam1 complex (aka DASH complex), couples kinetochores to the force produced by MT depolymerization thereby aiding in chromosome segregation; also localized to nuclear side of spindle pole body	DASH complex			-0.17108	0.033593	0.175196	-0.07661	-0.148574	-0.26905	-0.0315411	-3.69949		0.150048	3.23803
YDR202C	RAV2	851784	4	Subunit of RAVE (Rav1p, Rav2p, Skp1p), a complex that associates with the V1 domain of the vacuolar membrane (H+)-ATPase (V-ATPase) and promotes assembly and reassembly of the holoenzyme	RAVE complex	-0.0603227	-0.127667	-0.0533005	-0.114229	-0.0732038	-0.079225	0.049872	-0.471909	0.516918	0.14663	-0.346276	0.212671	0.178114
YDR204W	COQ4	851785	4	Protein with a role in ubiquinone (Coenzyme Q) biosynthesis, possibly functioning in stabilization of Coq7p; located on the matrix face of the mitochondrial inner membrane; component of a mitochondrial ubiquinone-synthesizing complex	Q-biosynthetic Coq polypeptide complex	0.116135	0.024232	-0.0889102	0.142171	-1.09944	0.246738	0.1057	-0.397636	-0.0422879	0.014318	-0.391057	0.278463	-0.0675345
YDR206W	EBS1	851787	4	Protein involved in inhibition of translation and nonsense-mediated decay; interacts with cap binding protein Cdc33p and with Nam7p; localizes to P-bodies upon glucose starvation; mRNA abundance regulated by mRNA decay factors		-0.0058208	0.042553	-0.341566	0.093802	-0.189935	-0.032344	0.179184	-0.255451	-0.0600497	0.069808	-0.399156	-0.183113	-0.0557525
YDR207C	UME6	851788	4	Key transcriptional regulator of early meiotic genes, binds URS1 upstream regulatory sequence, couples metabolic responses to nutritional cues with initiation and progression of meiosis, forms complex with Ime1p, and also with Sin3p-Rpd3p	Ume6p/Ime1p complex|Rpd3L complex	0.160582	-0.119563	-0.0749953	-0.198525	0.144355	-0.14426	-0.218918	0.128305	-0.460211	0.050626	-0.178965	-0.304876	0.179677
YDR208W	MSS4	851789	4	Phosphatidylinositol-4-phosphate 5-kinase, involved in actin cytoskeleton organization and cell morphogenesis; multicopy suppressor of stt4 mutation		-0.0128048	0.246039	-0.170283	0.453972	-0.162301	-0.334649	-0.061531	-0.0133115	-0.13788	-0.016747	0.043088	0.155828	-0.0390285
YDR211W	GCD6	851797	4	Catalytic epsilon subunit of the translation initiation factor eIF2B, the guanine-nucleotide exchange factor for eIF2; activity subsequently regulated by phosphorylated eIF2; first identified as a negative regulator of GCN4 expression	eIF2B	0.0389963	-0.179995	-0.084665	0.028852	-0.0971918	-0.13502	0.130777	-0.167961	-0.0008957	-0.136321	0.044452	-0.42517	-0.129553
YDR212W	TCP1	851798	4	Alpha subunit of chaperonin-containing T-complex, which mediates protein folding in the cytosol; involved in actin cytoskeleton maintenance; overexpression in neurons suppresses formation of pathogenic conformations of huntingtin protein	chaperonin-containing T-complex	0.0298768	-0.10027	0.167604	-0.01522	0.0169241	0.024176	0.133365	0.13717	0.0146554	-0.0423	0.00468	-0.185381	0.0635345
YDR213W	UPC2	851799	4	Sterol regulatory element binding protein, induces transcription of sterol biosynthetic genes and of DAN/TIR gene products; Ecm22p homolog; relocates from intracellular membranes to perinuclear foci on sterol depletion		-0.0363466	0.497568	-0.358861	-0.406374		0.125859			0.0444793		0.387729	-0.073248	-0.0766555
YDR214W	AHA1	851800	4	Co-chaperone that binds to Hsp82p and activates its ATPase activity; similar to Hch1p; expression is regulated by stresses such as heat shock		0.0392793	-0.24785	0.176273	0.281591	0.287096	0.135233	0.250047	0.165933	-0.0265992	-0.288218	0.402615	0.446649	0.182569
YDR216W	ADR1	851802	4	Carbon source-responsive zinc-finger transcription factor, required for transcription of the glucose-repressed gene ADH2, of peroxisomal protein genes, and of genes required for ethanol, glycerol, and fatty acid utilization		-0.321834	-0.794143	0.224602	-0.957537	0.374391	0.050412	-0.429349	-1.18891	0.490621	-0.210129	-0.366494	0.761392	-1.52784
YDR217C	RAD9	851803	4	DNA damage-dependent checkpoint protein, required for cell-cycle arrest in G1/S, intra-S, and G2/M; transmits checkpoint signal by activating Rad53p and Chk1p; hyperphosphorylated by Mec1p and Tel1p; potential Cdc28p substrate		0.0680483	0.065529	-0.0804173	-0.020886	0.666029	0.082083	0.53087	-0.0993115	-0.0750599	0.276487	0.337993	-0.267367	-0.0724075
YDR219C	MFB1	851805	4	Mitochondria-associated F-box protein involved in maintenance of normal mitochondrial morphology; interacts with Skp1p through the F-box motif; preferentially localizes to the mother cell during budding		-0.0184119	-0.733034	0.0054495	-0.13305		0.229809	0.206547		-0.169047	0.212136	0.058912	-0.259354	0.0237265
YDR221W	GTB1	851807	4	Glucosidase II beta subunit, forms a complex with alpha subunit Rot2p, involved in removal of two glucose residues from N-linked glycans during glycoprotein biogenesis in the ER	Rot2p/Gtb1p complex	-0.051371	0.054664	0.0260975	0.225926	-0.0964738	0.02106	0.236611	0.0639885	0.0323638	-0.018805	0.569421	0.205943	0.250064
YDR222W	YDR222W	851808	4	Protein of unknown function; green fluorescent protein (GFP)-fusion protein localizes to the cytoplasm in a punctate pattern		-0.230731	0.338313	0.29953	0.519057	0.826579	-0.013723	0.882995	-0.0434625	1.76836	-0.588627	-1.52548	-0.198838	1.5157
YDR224C	HTB1	851810	4	Histone H2B, core histone protein required for chromatin assembly and chromosome function; nearly identical to HTB2; Rad6p-Bre1p-Lge1p mediated ubiquitination regulates transcriptional activation, meiotic DSB formation and H3 methylation	Nucleosomal protein complex|Chz1p/Htz1p/Htb1p complex	-0.0774752	0.184875	0.055428	0.027767	-0.453577	-0.0005095	-0.246939	-0.296208	-0.490478	0.247059	-0.332074	-0.112604	0.172085
YDR225W	HTA1	851811	4	Histone H2A, core histone protein required for chromatin assembly and chromosome function; one of two nearly identical subtypes (see also HTA2); DNA damage-dependent phosphorylation by Mec1p facilitates DNA repair; acetylated by Nat4p	Nucleosomal protein complex	-0.0091618	-0.024848	0.166257	0.034213	-0.553566	-0.0486605	-0.414914	-0.0739255	-0.640921	0.165678	-0.193713	-0.112955	0.237096
YDR226W	ADK1	851812	4	Adenylate kinase, required for purine metabolism; localized to the cytoplasm and the mitochondria; lacks cleavable signal sequence		0.0577143	-0.146143	-0.0391185	-0.30658	0.0500153	0.492472	-0.237161	-0.123017	0.202607	-0.045118	-0.075206	-0.32283	-0.362874
YDR227W	SIR4	851813	4	Silent information regulator that, together with SIR2 and SIR3, is involved in assembly of silent chromatin domains at telomeres and the silent mating-type loci; potentially phosphorylated by Cdc28p; some alleles of SIR4 prolong lifespan	chromatin silencing complex	-0.116323	0.149666	0.106069	-0.049899	0.164432	0.036092	-0.045284	0.0250545	-0.0001609	0.001057	0.095092	0.03946	-0.0159745
YDR228C	PCF11	851814	4	mRNA 3' end processing factor, essential component of cleavage and polyadenylation factor IA (CF IA), involved in pre-mRNA 3' end processing and in transcription termination; binds C-terminal domain of largest subunit of RNA pol II (Rpo21p)	mRNA cleavage factor complex (CFI)	-0.134337	-0.00979	0.244715	-0.019208	0.0762596	0.124846	0.196224	-0.0754625	0.0782029	0.328528	-0.029309	0.122551	0.11652
YDR229W	IVY1	851815	4	Phospholipid-binding protein that interacts with both Ypt7p and Vps33p, may partially counteract the action of Vps33p and vice versa, localizes to the rim of the vacuole as cells approach stationary phase		-0.115306	0.225822	-0.128352	0.016177	-1.77281	-0.052521	-0.217504	-0.117662	-0.107461	0.187682	0.224448	0.388523	0.200529
YDR231C	COX20	851817	4	Mitochondrial inner membrane protein, required for proteolytic processing of Cox2p and its assembly into cytochrome c oxidase		-0.38201	0.469961	0.480934	0.038835	-0.0980518	0.480549	0.255169	-0.147342	-0.577505	0.440326	-0.13938	0.659495	-0.458166
YDR232W	HEM1	851818	4	5-aminolevulinate synthase, catalyzes the first step in the heme biosynthetic pathway; an N-terminal signal sequence is required for localization to the mitochondrial matrix; expression is regulated by Hap2p-Hap3p		0.146931	0.027137	-0.176172	0.369236	-0.0805978	0.035981	-0.111301	0.366787	-0.274437	-0.3891	-0.02089	0.37382	-0.319335
YDR233C	RTN1	851819	4	ER membrane protein that interacts with Sey1p to maintain ER morphology; interacts with exocyst subunit Sec6p, with Yip3p, and with Sbh1p; null mutant has an altered ER morphology; member of the RTNLA (reticulon-like A) subfamily		0.0757383	-0.086264	-0.0304085	-0.524631	-0.0352946	-0.087466	-0.074278	-0.0381635	0.0326814	-0.168813	-0.138081	-0.135245	0.118265
YDR234W	LYS4	851820	4	Homoaconitase, catalyzes the conversion of homocitrate to homoisocitrate, which is a step in the lysine biosynthesis pathway		0.358914	0.174201	0.195337	1.05102	-0.422016	-0.089974	-0.396384	0.849386	-0.0377715	-0.435084	0.47796	-0.434904	-0.551445
YDR235W	PRP42	851821	4	U1 snRNP protein involved in splicing, required for U1 snRNP biogenesis; contains multiple tetriatricopeptide repeats	commitment complex|U1 snRNP complex	0.208481	0.417449	0.0628445	0.026607		0.018235			-0.154944	1.75983
YDR236C	FMN1	851822	4	Riboflavin kinase, phosphorylates riboflavin to form riboflavin monophosphate (FMN), which is a necessary cofactor for many enzymes; localizes to microsomes and to the mitochondrial inner membrane		0.0269013	-0.021904	0.266873	0.092128	-0.351348	0.553891		-0.0715975	0.234716	0.33128	0.792378	0.03545	-0.230185
YDR237W	MRPL7	851823	4	Mitochondrial ribosomal protein of the large subunit	mitochondrial ribosomal large subunit	0.0533563	0.110657	0.110548	0.130263	0.0178543	0.417176	-0.140848	1.00331	-0.764298	0.527057	0.187054	0.612167	-0.0079475
YDR238C	SEC26	851824	4	Essential beta-coat protein of the COPI coatomer, involved in ER-to-Golgi protein trafficking and maintenance of normal ER morphology; shares 43% sequence identity with mammalian beta-coat protein (beta-COP)	COPI	-0.0605911	-0.083744	-0.0069365	0.000123	0.037004	-0.052445	-0.101528	-0.269172	-0.100131	-0.164937	-0.040325	-0.232748	-0.0998975
YDR239C	YDR239C	851825	4	Protein of unknown function that may interact with ribosomes, based on co-purification experiments		0.0251349	0.105137	-0.210384	0.065492	0.0362557	-0.286127	-0.10672	-0.567905	-0.213835	-0.034317	-0.145001	-0.090682	-0.195252
YDR240C	SNU56	851827	4	Component of U1 snRNP required for mRNA splicing via spliceosome; yeast specific, no metazoan counterpart; interacts with mRNA in commitment complex	commitment complex|U1 snRNP complex	0.0120487			0.041296		0.944469	-0.058531		-0.0843738	0.045511		-0.117412	0.464535
YDR242W	AMD2	851829	4	Putative amidase					3.48797									-0.516133
YDR243C	PRP28	851830	4	RNA helicase in the DEAD-box family, involved in RNA isomerization at the 5' splice site	U5 snRNP complex	0.110422	0.242117	-0.0134445	0.011614		0.201894	0.308844	-0.317703	0.0931169	0.272771	0.040449	-0.185705	0.0739645
YDR244W	PEX5	851831	4	Peroxisomal membrane signal receptor for the C-terminal tripeptide signal sequence (PTS1) of peroxisomal matrix proteins, required for peroxisomal matrix protein import; also proposed to have PTS1-receptor independent functions		0.10163	-0.02083	0.0424175	0.295254	0.0272091	0.158441	-0.093254	0.111722	-0.482178	-0.081027	0.302626	0.124425	-0.0264065
YDR245W	MNN10	851832	4	Subunit of a Golgi mannosyltransferase complex also containing Anp1p, Mnn9p, Mnn11p, and Hoc1p that mediates elongation of the polysaccharide mannan backbone; membrane protein of the mannosyltransferase family	alpha-1,6-mannosyltransferase complex(Anp1p/Mnn9p)	-0.0265431	-0.008958	-0.100986	-0.001425	-0.120957		0.128115	-0.101211	0.0459959	0.233734	-0.068355	-0.158042	-0.195127
YDR246W	TRS23	851833	4	One of 10 subunits of the transport protein particle (TRAPP) complex of the cis-Golgi which mediates vesicle docking and fusion; involved in endoplasmic reticulum (ER) to Golgi membrane traffic; human homolog is TRAPPC4	TRAPP complex	-0.0793241	0.026031	-0.0183685	-0.016472	0.029606	-0.034612	0.0554279	0.102086	-0.0415982	-0.192326	-0.223208	0.179806	0.0393275
YDR248C	YDR248C	851835	4	Putative protein of unknown function; sequence similarity to bacterial and human gluconokinase; green fluorescent protein (GFP)-fusion protein localizes to the cytoplasm; upregulated by deletion of the RNAP-II associated factor, PAF1		0.0112791	-0.055575	0.396379	0.248305	0.0169356	0.24548	-0.223897	0.0859535	-0.263239	-0.027393	0.151074	0.37221	0.24123
YDR251W	PAM1	851838	4	Essential protein of unknown function; exhibits variable expression during colony morphogenesis; overexpression permits survival without protein phosphatase 2A, inhibits growth, and induces a filamentous phenotype		-0.0810929	0.054063	0.0511585	-0.113346	0.175081	0.010357	-0.151507	0.0063625	-0.112627	0.178383	0.114804	0.452963	0.148628
YDR252W	BTT1	851839	4	Beta3 subunit of the heterotrimeric nascent polypeptide-associated complex which binds ribosomes via its beta-subunits in close proximity to nascent polypeptides; interacts with Caf130p of the CCR4-NOT complex; similar to human BTF3	nascent polypeptide-associated complex	-0.240966	0.23628	0.83072	-1.45284	0.287428	-0.394367	0.114858	0.237046	-0.0459945	-0.55139	0.226488	-0.030499	-1.6238
YDR255C	RMD5	851842	4	Conserved protein that has an E3-like ubiquitin ligase activity necessary for polyubiquitination and degradation of the gluconeogenic enzyme fructose-1,6-bisphosphatase; also required for sporulation; has a degenerate RING finger domain	FBP degradation complex	-0.112613		0.104428	-0.173286			0.111357	0.307152	0.112208	0.299556		-0.071418	0.173484
YDR257C	RKM4	851844	4	Ribosomal lysine methyltransferase specific for monomethylation of Rpl42ap and Rpl42bp (lysine 55); nuclear SET-domain containing protein		0.0474353	0.033393	-0.0348865	0.176254	0.149165	-0.094768	0.020442	0.0390095	0.354698	-0.053227	0.084502	-0.033384	-0.0752155
YDR258C	HSP78	851845	4	Oligomeric mitochondrial matrix chaperone that cooperates with Ssc1p in mitochondrial thermotolerance after heat shock; able to prevent the aggregation of misfolded proteins as well as resolubilize protein aggregates		-0.135238	0.445578	0.203622	1.0388	0.273111	0.435261	0.210274	0.336935	-0.197037	0.661853	0.480396	0.851512	-0.0759145
YDR259C	YAP6	851846	4	Putative basic leucine zipper (bZIP) transcription factor; overexpression increases sodium and lithium tolerance; computational analysis suggests a role in regulation of expression of genes involved in carbohydrate metabolism		0.102735		0.381528	-0.896016			0.613707		0.548731	0.190208	0.268979	1.41499	0.507835
YDR261C	EXG2	851848	4	Exo-1,3-beta-glucanase, involved in cell wall beta-glucan assembly; may be anchored to the plasma membrane via a glycosylphosphatidylinositol (GPI) anchor		-0.100709	-0.061671	-0.143072	-0.445283	0.35908	0.285705		0.344168	0.6863		0.57491	0.674807	0.30347
YDR262W	YDR262W	851855	4	Putative protein of unknown function; green fluorescent protein (GFP)-fusion protein localizes to the vacuole and is induced in response to the DNA-damaging agent MMS; gene expression increases in response to Zymoliase treatment		-0.152349	0.24895	-0.396713	0.032284	0.0048705	0.294875	-0.095266	0.0021195	0.404371	0.191614	0.842868	0.6587	0.245307
YDR264C	AKR1	851857	4	Palmitoyl transferase involved in protein palmitoylation; acts as a negative regulator of pheromone response pathway; required for endocytosis of pheromone receptors; involved in cell shape control; contains ankyrin repeats		-0.0398915	0.194912	-0.325736	-0.036983	0.253289	-0.105606	0.0748135	-0.380346	0.130639	0.073034	0.630552	-0.457795	0.0242185
YDR266C	YDR266C	851859	4	Protein of unknown function that may interact with ribosomes, based on co-purification experiments;green fluorescent protein (GFP)-fusion protein localizes to the cytoplasm; contains a RING finger domain		0.0894983	-0.134888	-0.118342	-0.057911	-0.214174	-0.250568	-0.280507	-0.0050905	-0.171153	-0.205342	-0.347208	-0.237175	-0.0347525
YDR267C	CIA1	851860	4	WD40 repeat protein involved in assembly of cytosolic and nuclear iron-sulfur proteins; similar to the human Ciao1 protein; YDR267C is an essential gene		0.251979	-0.001457	-0.263686	0.39038	-0.163191	-0.122274	-0.01085	-0.283744	-0.136391	-0.136344	0.023491	0.216055	0.0110195
YDR268W	MSW1	851861	4	Mitochondrial tryptophanyl-tRNA synthetase		-0.125694	-0.048234	-0.286493	0.093501	-0.0519465	0.086067	-0.159126	0.325586	-0.404606	0.365286	0.100473	0.288808	-0.0353555
YDR270W	CCC2	851862	4	Cu(+2)-transporting P-type ATPase, required for export of copper from the cytosol into an extracytosolic compartment; has similarity to human proteins involved in Menkes and Wilsons diseases		-0.29889		-0.957744	-0.223235		0.600725	0.330004		0.37167	0.599886	-0.300481	-0.153315	0.669544
YDR272W	GLO2	851865	4	Cytoplasmic glyoxalase II, catalyzes the hydrolysis of S-D-lactoylglutathione into glutathione and D-lactate		0.35546	-0.224145	0.175441	0.076531	-0.34809	-0.157151	-0.449731	0.241722	-0.349512	0.0840187	0.284043	0.203023	-0.0516865
YDR279W	RNH202	851873	4	Ribonuclease H2 subunit, required for RNase H2 activity; related to human AGS2 that causes Aicardi-Goutieres syndrome	ribonuclease H2 complex	0.163679	-0.259948	0.0152185	0.030926	-0.0881398	-0.086499	-0.263788	-0.0278405	-0.218647	-0.137379	-0.07788	0.136356	0.142613
YDR280W	RRP45	851874	4	Exosome non-catalytic core component; involved in 3'-5' RNA processing and degradation in both the nucleus and the cytoplasm; has similarity to E. coli RNase PH and to human hRrp45p (PM/SCL-75, EXOSC9)	Nuclear exosome complex|Cytoplasmic exosome complex	-0.0263935	0.041973	-0.103087	0.238804	-0.0875908	-0.088558	-0.116548	-0.0193985	0.146302	0.026391	-0.23807	-0.347338	0.0055805
YDR282C	YDR282C	851876	4	Putative protein of unknown function		-0.241907	0.285809	0.192792			0.119127	-0.884641		-0.502755	0.161586		1.10682	0.233352
YDR283C	GCN2	851877	4	Protein kinase, phosphorylates the alpha-subunit of translation initiation factor eIF2 (Sui2p) in response to starvation; activated by uncharged tRNAs and the Gcn1p-Gcn20p complex; contributes to DNA damage checkpoint control		-0.141685	0.070317	0.0280415	0.253899	-0.137652	0.16466	-0.020776	0.618194	0.0817209	0.069251	0.415687	0.139804	0.0826245
YDR286C	YDR286C	851880	4	Putative protein of unknown function; predicted to have thiol-disulfide oxidoreductase active site		0.12721	0.003156	0.0019095	-0.426008	0.228883	0.27772	-0.045643	0.737456	-0.843224	0.613987	0.574812	0.677067
YDR287W	INM2	851881	4	Inositol monophosphatase, involved in biosynthesis of inositol; enzymatic activity requires magnesium ions and is inhibited by lithium and sodium ions; inm1 inm2 double mutant lacks inositol auxotrophy		-0.0253803	0.122129	-0.104855	0.293711	0.185644		-0.076557	-0.257727	-0.0035104	0.019653	0.320597	0.244557	0.192684
YDR288W	NSE3	851882	4	Essential subunit of the Mms21-Smc5-Smc6 complex; protein of unknown function; required for DNA repair and growth	smc5p-Smc6p complex	-0.10672	0.136934	-0.363591	0.288397			-0.32518		-0.168773	-0.229258		0.196504
YDR289C	RTT103	851884	4	Protein that interacts with exonuclease Rat1p and Rai1p and plays a role in transcription termination by RNA polymerase II, has an RPR domain (carboxy-terminal domain interacting domain); also involved in regulation of Ty1 transposition	RNA Degradation Complex	0.0845123	-0.235259	-0.204912	0.054764	0.175411	-0.133965	-0.072423	0.0369195	0.393527	-0.37483	0.342447	0.104262	0.0888025
YDR291W	HRQ1	851885	4	Putative RecQ helicase; belongs to the widely conserved RecQ family of proteins which are involved in maintaining genomic integrity; similar to the human RecQ4p implicated in Rothmund-Thomson syndrome(RTS)		0.499872	-0.191501	0.405463	0.058674		0.020321	0.033731	0.40879	0.185947	-0.047728	0.294212	0.118701	0.0005455
YDR292C	SRP101	851886	4	Signal recognition particle (SRP) receptor alpha subunit; contain GTPase domains; involved in SRP-dependent protein targeting; interacts with the beta subunit, Srp102p	signal recognition particle receptor complex	0.11304	-0.060432	-0.0030065	0.248004	0.0427038	-0.062055	-0.094337	-0.404094	-0.120438	-0.075996	0.15117	-0.138117	-0.121999
YDR293C	SSD1	851887	4	RNA-binding protein with a role in maintenance of cellular integrity, interacts with components of the TOR pathway; ssd1 mutant of a clinical S. cerevisiae strain displays elevated virulence		-0.118691	-0.092156	-0.16744	-0.099529	0.0462085	0.147176	0.252604	0.294793	0.155981	-0.19339	0.256738	0.43568	0.432988
YDR294C	DPL1	851888	4	Dihydrosphingosine phosphate lyase, regulates intracellular levels of sphingolipid long-chain base phosphates (LCBPs), degrades phosphorylated long chain bases, prefers C16 dihydrosphingosine-l-phosphate as a substrate		0.0110836	-0.026767	-0.0087285	-0.089389	0.0210689	0.122759	0.226824	-0.0699095	0.0894389	-0.144326	0.299512	0.354521	0.115902
YDR295C	HDA2	851889	4	Subunit of a possibly tetrameric trichostatin A-sensitive class II histone deacetylase complex containing an Hda1p homodimer and an Hda2p-Hda3p heterodimer; involved in telomere maintenance	histone deacetylase complex	0.0631573	0.077084	0.0149975	0.134597	0.147106	0.054595	0.0863713	-0.0594935	0.123678	0.064686	0.163619	-0.024938	0.143819
YDR296W	MHR1	851890	4	Protein involved in homologous recombination in mitochondria; required for recombination-dependent mtDNA partitioning; involved in stimulation of mitochondrial DNA replication in response to oxidative stress		-0.102163	0.264222	0.137012	0.141735	-0.345416	0.44261	0.30015	1.0477	-0.520675	0.447195	-0.17874	0.629841	-0.175557
YDR297W	SUR2	851891	4	Sphinganine C4-hydroxylase, catalyses the conversion of sphinganine to phytosphingosine in sphingolipid biosyntheis		0.0169682	-0.093031	-0.455717	-0.395281	-0.208263	-0.147505	-0.417709	-0.0643745	0.502278	0.015278	-0.054022	-0.172294	-0.647147
YDR298C	ATP5	851892	4	Subunit 5 of the stator stalk of mitochondrial F1F0 ATP synthase, which is an evolutionarily conserved enzyme complex required for ATP synthesis; homologous to bovine subunit OSCP (oligomycin sensitivity-conferring protein); phosphorylated	F0/F1 ATP synthase (complex V)	-0.0128919	0.335485	0.102407	-0.283032	-0.0333713	0.322486	0.181836	0.627595	-0.669895	0.340422	-0.253002	0.711287	0.0334045
YDR299W	BFR2	851893	4	Essential protein that is a component of 90S preribosomes; may be involved in rRNA processing; multicopy suppressor of sensitivity to Brefeldin A; expression is induced during lag phase and also by cold shock		0.0106704	-0.026949	-0.141669	-0.051046	0.0672482	-0.12694	0.074435	-0.0351435	0.185412	0.06566	0.061607	-0.204897	0.144153
YDR300C	PRO1	851894	4	Gamma-glutamyl kinase, catalyzes the first step in proline biosynthesis		0.0405913	-0.169122	-0.100613	0.035527	-0.150787	-0.128792	0.011485	-0.0321165	0.14161	-0.287267	-0.293173	-0.369822	0.0585015
YDR301W	CFT1	851895	4	RNA-binding subunit of the mRNA cleavage and polyadenylation factor; involved in poly(A) site recognition and required for both pre-mRNA cleavage and polyadenylation, 51% sequence similarity with mammalian AAUAA-binding subunit of CPSF	mRNA cleavage and polyadenylation specificity factor complex	0.0718593	-0.028849	0.0368785	0.156879	-0.201669	-0.134617	0.0524839	-0.355294	-0.0058605	-0.162553	0.140827	-0.429086	-0.135898
YDR303C	RSC3	851897	4	Component of the RSC chromatin remodeling complex; essential gene required for maintenance of proper ploidy and regulation of ribosomal protein genes and the cell wall/stress response; highly similar to Rsc30p	RSC complex	-0.0964647	0.148401	-0.0112545	-0.079574	-0.333616	0.034836	0.028756	-0.154479	-0.247027	-0.076006	0.064595	-0.339293	-0.0801045
YDR304C	CPR5	851898	4	Peptidyl-prolyl cis-trans isomerase (cyclophilin) of the endoplasmic reticulum, catalyzes the cis-trans isomerization of peptide bonds N-terminal to proline residues; transcriptionally induced in response to unfolded proteins in the ER		0.0717393	-0.210678	-0.0473305	-0.099776	-0.0486523	-0.023083	0.017337	-0.11327	0.0020447	0.115009	0.174896	0.294076	-0.0056875
YDR305C	HNT2	851899	4	Dinucleoside triphosphate hydrolase; has similarity to the tumor suppressor FHIT and belongs to the histidine triad (HIT) superfamily of nucleotide-binding proteins		0.0681353	-0.070926	0.151535	0.003826	-0.0365824	-0.390538	-0.489056	0.0163075	-0.431484	-0.388509	0.040809	0.519999	0.353907
YDR307W	YDR307W	851902	4	Putative protein of unknown function		0.151604	-0.046405	-0.0105375		-0.164119	-0.228265	0.047676	-0.1676	-0.64462	0.262617	0.284857	-0.215187	-0.0731165
YDR308C	SRB7	851903	4	Subunit of the RNA polymerase II mediator complex; associates with core polymerase subunits to form the RNA polymerase II holoenzyme; essential for transcriptional regulation; target of the global repressor Tup1p	Kornberg's mediator (SRB) complex	-0.0640429	-0.006149	0.0203315	0.190348	-0.380866	0.147604	-0.029001		-0.0288993	-0.153424	0.231169	0.583143	0.0463995
YDR310C	SUM1	851905	4	Transcriptional repressor required for mitotic repression of middle sporulation-specific genes; also acts as general replication initiation factor; involved in telomere maintenance, chromatin silencing; regulated by pachytene checkpoint	Sum1p/Rfm1p/Hst1p complex	0.0536453	-0.029869	0.0364565	-0.23586	-0.0042164	-0.120959	0.014018	0.122455	-0.0968005	-0.043655	-0.086837	-0.114295	-0.0683755
YDR311W	TFB1	851906	4	Subunit of TFIIH and nucleotide excision repair factor 3 complexes, required for nucleotide excision repair, target for transcriptional activators	transcription factor TFIIH complex|nucleotide-excision repair factor 3 complex	0.0471873	-0.103857	0.0306155	-0.072191	0.063787	-0.251565	-0.019748	-0.120117	0.310414	-0.180295	-0.173613	-0.163414	0.0759255
YDR312W	SSF2	851907	4	Protein required for ribosomal large subunit maturation, functionally redundant with Ssf1p; member of the Brix family		0.185674	-0.124951	0.0583935	-0.021933	-0.151062	-0.201783	0.0668035	0.607272	-0.444099	-0.119963	-0.00325	-0.031739	0.0015835
YDR313C	PIB1	851908	4	RING-type ubiquitin ligase of the endosomal and vacuolar membranes, binds phosphatidylinositol(3)-phosphate; contains a FYVE finger domain				-0.126105			0.088511	0.0675334		-0.151429	0.16755	-0.199073	0.508055	-0.0959995
YDR316W	OMS1	851911	4	Protein integral to the mitochondrial membrane; has a conserved methyltransferase motif; multicopy suppressor of respiratory defects caused by OXA1 mutations		-0.0187563	0.182148	0.335969	-0.083781	-0.113143	0.631236	-0.021433	1.01738	-0.299944	0.616745	-0.191729	0.774511	0.107357
YDR318W	MCM21	851916	4	Protein involved in minichromosome maintenance; component of the COMA complex (Ctf19p, Okp1p, Mcm21p, Ame1p) that bridges kinetochore subunits that are in contact with centromeric DNA and the subunits bound to microtubules	COMA complex	-2.01893	0.268913	-1.46984	-4.97475		-0.342569	-0.229347	-2.72698	0.73149	1.63721	-1.7814	-3.5707	-3.69242
YDR320C	SWA2	851918	4	Auxilin-like protein involved in vesicular transport; clathrin-binding protein required for uncoating of clathrin-coated vesicles		-0.0300635	0.002765	-0.127616	0.012427	0.143784	-0.013982	-0.054307	-0.208371	0.245958	-0.180316	-0.001629	0.016224	-0.176245
YDR321W	ASP1	851920	4	Cytosolic L-asparaginase, involved in asparagine catabolism		0.0759333	-0.216082	-0.121095	-0.148764	0.0114233	-0.313548	-0.016959	0.0365585	-0.0930194	-0.338981	-0.069895	-0.482332	-0.0845185
YDR322C-A	TIM11	851922	4	Subunit e of mitochondrial F1F0-ATPase, which is a large, evolutionarily conserved enzyme complex required for ATP synthesis; essential for the dimeric and oligomeric state of ATP synthase	F0/F1 ATP synthase (complex V)	0.0320029	0.289145						0.577784	-1.0466			0.338475
YDR322W	MRPL35	851921	4	Mitochondrial ribosomal protein of the large subunit	mitochondrial ribosomal large subunit	0.0109948	0.189232	0.125381	0.090266	0.0454696	0.34447	-0.065672	0.810326	-0.653448	0.419558	0.114245	0.49977	-0.113627
YDR323C	PEP7	851923	4	Multivalent adaptor protein that facilitates vesicle-mediated vacuolar protein sorting by ensuring high-fidelity vesicle docking and fusion, which are essential for targeting of vesicles to the endosome; required for vacuole inheritance			-0.283438		-0.047734		-0.367298		0.0827185		-0.531317	0.921048		0.334985
YDR324C	UTP4	851924	4	Subunit of U3-containing 90S preribosome and Small Subunit (SSU) processome complexes involved in production of 18S rRNA and assembly of small ribosomal subunit; member of t-Utp subcomplex involved with transcription of 35S rRNA transcript	UTP A complex	0.0184386	-0.084913	-0.0452895	0.04065	-0.0485538	-0.100624	0.127904	-0.0443405	0.021433	0.006289	-0.12512	-0.355237	0.0550055
YDR325W	YCG1	851925	4	Subunit of the condensin complex; required for establishment and maintenance of chromosome condensation, chromosome segregation and chromatin binding of the condensin complex; required for clustering of tRNA genes at the nucleolus	nuclear condensin complex	-0.134416	-0.113322	0.167895	-0.042432	-0.115826	-0.115692	0.007913	-0.316204	-0.0611137	0.137157	0.036963	-0.184149	0.0564685
YDR326C	YSP2	851926	4	Protein involved in programmed cell death; mutant shows resistance to cell death induced by amiodarone or intracellular acidification		-0.0210693	0.072011	0.0161375	-0.00208	0.222551	0.094881	-0.048761	0.0021295	-0.0358447	-0.046686	-0.034345	-0.184387	0.0552855
YDR328C	SKP1	851928	4	Evolutionarily conserved kinetochore protein that is part of multiple protein complexes, including the SCF ubiquitin ligase complex, the CBF3 complex that binds centromeric DNA, and the RAVE complex that regulates assembly of the V-ATPase	SCF-CDC4 complex|nuclear ubiquitin ligase complex|RAVE complex|CBF3 complex	-0.0137687	-0.097276	0.0724555	0.006982	-0.0396733	-0.071861	-0.19688	-0.130426	-0.0216228	0.016923	0.202578	0.108484	-0.111813
YDR329C	PEX3	851929	4	Peroxisomal membrane protein (PMP) required for proper localization and stability of PMPs; anchors peroxisome retention factor Inp1p at the peroxisomal membrane; interacts with Pex19p		0.0441203	0.142535	-0.161555	0.257779	0.402497	0.066674		0.0208925	0.0574199	0.286815	-0.023858	0.063761	0.121542
YDR330W	UBX5	851930	4	UBX (ubiquitin regulatory X) domain-containing protein that interacts with Cdc48p		0.0560803	-0.074705	-0.0925792	-0.194551	-0.201149	-0.239353	-0.21955	-0.0876515	-0.127605	-0.033102	-0.032372	0.0959703	-0.0203795
YDR331W	GPI8	851931	4	ER membrane glycoprotein subunit of the glycosylphosphatidylinositol transamidase complex that adds glycosylphosphatidylinositol (GPI) anchors to newly synthesized proteins; human PIG-K protein is a functional homolog	GPI-anchor transamidase complex		-0.050865	-0.37397	-0.044574	0.15839	0.069548				0.117045	-0.374265		-0.0999495
YDR332W	IRC3	851932	4	Putative RNA helicase of the DEAH/D-box family; null mutant displays increased levels of spontaneous Rad52p foci; green fluorescent protein (GFP)-fusion protein localizes to the mitochondrion		0.0572903	0.19654		-0.079109		0.122034				-0.196669	-0.599302		-0.0393555
YDR333C	YDR333C	851933	4	Putative protein of unknown function		-0.0494062	0.007993	0.120698	-0.012166	-0.118773	-0.483748	0.160205	-0.240753	-0.0015128	0.01595	-0.16922	-0.165226	0.0731845
YDR334W	SWR1	851934	4	Swi2/Snf2-related ATPase that is the structural component of the SWR1 complex, which exchanges histone variant H2AZ (Htz1p) for chromatin-bound histone H2A	Swr1p complex	0.0027314	-0.084839	0.174992	-0.005341	0.124277	-0.11214	0.04075	-0.0271725	0.0264243	0.344884	-0.827857	-0.33047	0.180854
YDR335W	MSN5	851935	4	Karyopherin involved in nuclear import and export of proteins, including import of replication protein A and export of Swi6p, Far1p, and Pho4p; required for re-export of mature tRNAs after their retrograde import from the cytoplasm		-0.106585	-0.007032	0.157579	-0.015142	0.119872	-0.064326	0.0601945	-0.251489	0.283153	-0.060669	0.046408	0.169827	-0.0421735
YDR337W	MRPS28	851937	4	Mitochondrial ribosomal protein of the small subunit	mitochondrial ribosomal small subunit	-0.0581244	0.23933	0.244901	-0.011738	0.0019204	0.174632	0.0618366	1.03603	-0.397431	0.460283	-0.052212	0.778779	-0.0457605
YDR339C	FCF1	851939	4	Putative PINc domain nuclease required for early cleavages of 35S pre-rRNA and maturation of 18S rRNA; component of the SSU (small subunit) processome involved in 40S ribosomal subunit biogenesis; copurifies with Faf1p		0.0817713	-0.197904	-0.109424	-0.197503	-0.226865	0.019958	0.261465	0.251955	-0.0547987	0.070145	-0.490954	-0.272489	0.0419235
YDR341C	YDR341C	851942	4	Arginyl-tRNA synthetase, proposed to be cytoplasmic but the authentic, non-tagged protein is detected in highly purified mitochondria in high-throughput studies		0.219834	-0.223528	-0.103188	0.264294	-0.20118	-0.204258	-0.239917	0.412575	0.243564	-0.333169	0.202818	-0.539258	-0.339226
YDR342C	HXT7	851943	4	High-affinity glucose transporter of the major facilitator superfamily, nearly identical to Hxt6p, expressed at high basal levels relative to other HXTs, expression repressed by high glucose levels		-0.474967	1.23703	-0.676683	-0.0375	0.227977	0.572939	-0.51418	0.594711	0.364413	1.24953	2.41304	1.85992	-1.42407
YDR343C	HXT6	851944	4	High-affinity glucose transporter of the major facilitator superfamily, nearly identical to Hxt7p, expressed at high basal levels relative to other HXTs, repression of expression by high glucose requires SNF3		-0.476049	1.24025	-0.679666	-0.032308	0.514019	1.03965	-0.512366	0.595033	0.593708	1.25547	2.41027	1.66293	-1.43115
YDR345C	HXT3	851946	4	Low affinity glucose transporter of the major facilitator superfamily, expression is induced in low or high glucose conditions		0.0060007	-0.439921	0.20145	-0.330205	-0.259303	-0.166009	-0.380636	-0.147241	-0.166796	-1.37084	-2.11357	-1.0769	0.248846
YDR346C	SVF1	851947	4	Protein with a potential role in cell survival pathways, required for the diauxic growth shift; expression in mammalian cells increases survival under conditions inducing apoptosis; mutant has increased aneuploidy tolerance		0.0024864	0.028495	-0.0002975	0.04656	0.199638	0.053415	0.031633	0.0028185	0.158165	-0.12263	0.212294	-0.127204	-0.0533345
YDR347W	MRP1	851948	4	Mitochondrial ribosomal protein of the small subunit; MRP1 exhibits genetic interactions with PET122, encoding a COX3-specific translational activator, and with PET123, encoding a small subunit mitochondrial ribosomal protein	mitochondrial ribosomal small subunit	0.0465833	0.257333	0.100094	0.278187	-0.0364238	0.330689	0.0953274	0.841085	-0.512782	0.570329	0.186237	0.669777	0.0604425
YDR348C	YDR348C	851949	4	Protein of unknown function; green fluorescent protein (GFP)-fusion protein localizes to the cell periphery and bud neck; potential Cdc28p substrate		0.0056043	0.022581	-0.0757232	-0.062217	-0.121396	0.010112	-0.204952	0.0284665	-0.205575	-0.169011	-0.292804	0.028637	0.177777
YDR349C	YPS7	851950	4	Putative GPI-anchored aspartic protease, member of the yapsin family of proteases involved in cell wall growth and maintenance; located in the cytoplasm and endoplasmic reticulum		-0.308126		0.228434		0.0319237	-0.099796	0.044695	0.427269	0.315261	0.015613		0.573876	-0.0311165
YDR351W	SBE2	851953	4	Protein involved in the transport of cell wall components from the Golgi to the cell surface; required for bud growth		0.0484423	-0.118198	-0.105083	0.200027	0.113448	0.166789	0.181704	-0.152602	0.348829	-0.18989		0.581827	0.14592
YDR353W	TRR1	851955	4	Cytoplasmic thioredoxin reductase, key regulatory enzyme that determines the redox state of the thioredoxin system, which acts as a disulfide reductase system and protects cells against both oxidative and reductive stress		0.0225355	-0.113882	0.0216755	-0.211356	0.24371	-0.038338	-0.070488	-0.143702	-0.0319726	0.186029	0.110495	-0.226537	0.0926275
YDR354W	TRP4	851956	4	Anthranilate phosphoribosyl transferase of the tryptophan biosynthetic pathway, catalyzes the phosphoribosylation of anthranilate, subject to the general control system of amino acid biosynthesis		0.304696	0.223274	-0.116246	0.434871	-0.382281	-0.26673	-0.213812	0.180184	0.131683	-0.281229	0.138945	-0.909458	-0.389516
YDR356W	SPC110	851957	4	Inner plaque spindle pole body (SPB) component, ortholog of human kendrin; involved in connecting nuclear microtubules to SPB; interacts with Tub4p-complex and calmodulin; phosphorylated by Mps1p in cell cycle-dependent manner	SPB components	-0.0700541	0.019556	0.0372245	0.028102	0.0348304	-0.12295	-0.135705	-0.283656	-0.208561	-0.029949	0.131767	-0.086333	0.269097
YDR357C	YDR357C	851959	4	Protein of unknown function; likely member of BLOC complex involved in endosomal cargo sorting; null mutant is sensitive to drug inducing secretion of vacuolar cargo; green fluorescent protein (GFP)-fusion protein localizes to the cytoplasm		-0.126931	-0.046022	-0.191542			0.596516	-0.161654	0.399769	1.27034	-0.091394		0.69774	0.205863
YDR358W	GGA1	851960	4	Golgi-localized protein with homology to gamma-adaptin, interacts with and regulates Arf1p and Arf2p in a GTP-dependent manner in order to facilitate traffic through the late Golgi		-0.195014	0.257719	0.0965045	-0.036236	0.0765174	0.259605	0.209068	-0.221672	0.172512	0.260365	-0.167982	0.33368	0.0421915
YDR359C	EAF1	851962	4	Component of the NuA4 histone acetyltransferase complex; acts as a platform for assembly of NuA4 subunits into the native complex; required for initiation of pre-meiotic DNA replication, likely due to its requirement for expression of IME1	NuA4 histone acetyltransferase complex	0.0958983	0.000528	0.113627	0.111168	-0.110641	-0.038611	-0.096469	0.338747	-0.0124571	-0.103747	0.074693	-0.107255	-0.0169795
YDR361C	BCP1	851963	4	Essential protein involved in nuclear export of Mss4p, which is a lipid kinase that generates phosphatidylinositol 4,5-biphosphate and plays a role in actin cytoskeleton organization and vesicular transport		0.114067	-0.154859	0.0347125	0.204008	-0.0691158	-0.002941	0.277206	0.307594	-0.0146089	-0.064557	0.020246	-0.25462	0.0770205
YDR362C	TFC6	851964	4	One of six subunits of RNA polymerase III transcription initiation factor complex (TFIIIC); part of TFIIIC TauB domain that binds BoxB promoter sites of tRNA and other genes; cooperates with Tfc3p in DNA binding; human homolog is TFIIIC-110	transcription factor TFIIIC complex	0.0486103	0.095554	0.128719	0.162487	0.0287421	0.011285	0.045924	-0.241576	0.381982	0.155545	0.239818	-0.016059	0.0971285
YDR363W	ESC2	851965	4	Sumo-like domain protein; prevents accumulation of toxic intermediates during replication-associated recombinational repair; roles in silencing, lifespan, chromatid cohesion and the intra-S-phase DNA damage checkpoint; RENi family member		-0.045404	0.193779		0.337136	0.367539	0.233017		0.10664	0.0003654	2.24218	0.076656	0.533029	-0.0907405
YDR363W-A	SEM1	851967	4	Component of the lid subcomplex of the regulatory subunit of the 26S proteasome; involved in mRNA export mediated by the TREX-2 complex (Sac3p-Thp1p); ortholog of human DSS1	19/22S regulator	-0.0130605	-0.082632	0.181926		0.0354109	0.088882	0.0951251	0.0163355	0.114083	0.070675	0.241191	0.326747	0.166918
YDR364C	CDC40	851968	4	Pre-mRNA splicing factor, important for catalytic step II of pre-mRNA splicing and plays a role in cell cycle progression; required for DNA synthesis during mitosis and meiosis; has WD repeats		-0.0673232	0.194896	0.0680345	-0.564927	-0.0756138	0.066221	0.289809		0.0258988	0.031374	-0.093636	-0.030478	-0.0428125
YDR365C	ESF1	851969	4	Nucleolar protein involved in pre-rRNA processing; depletion causes severely decreased 18S rRNA levels		0.0834153	-0.009746	-0.149565	-0.077424	0.133177	-0.085792	0.107557	0.0429265	0.178539	0.042936	0.220923	-0.367698	-0.114954
YDR367W	YDR367W	851973	4	Component of inositol phosphorylceramide (IPC) synthase; forms a complex with Aur1p and regulates its activity; required for IPC synthase complex localization to the Golgi; post-translationally processed by Kex2p; KEI1 is an essential gene		0.0584023	-0.173527	0.0985155	-0.304394	0.0064033	-0.106146	0.137977	-0.296024	-0.114481	0.204983	-0.435935	-0.161551	-0.0158795
YDR368W	YPR1	851974	4	NADPH-dependent aldo-keto reductase, reduces multiple substrates including 2-methylbutyraldehyde and D,L-glyceraldehyde, expression is induced by osmotic and oxidative stress; functionally redundant with other aldo-keto reductases		-0.0524769	-0.189359	-0.196545	-0.597426	-0.0736808	0.241629	-0.096234	-0.572923	0.343982	0.0922676	-0.26794	-0.530325	-0.174247
YDR369C	XRS2	851975	4	Protein required for DNA repair; component of the Mre11 complex, which is involved in double strand breaks, meiotic recombination, telomere maintenance, and checkpoint signaling	MRX complex	-0.0467458	-0.033564	3.15915			0.289266	0.178019	-0.614683	0.134066	-0.053674	0.235694		0.31848
YDR371W	CTS2	851977	4	Putative chitinase, functionally complements A. gossypii cts2 mutant sporulation defect			-0.22286	0.0153835	0.19485		0.135248		-0.120065	0.180186	-0.376887	0.713808	0.6858	0.0417795
YDR372C	VPS74	851978	4	Protein required for Golgi localization of glycosyltransferases; binds the cytosolic domains of Golgi glycosyltransferases; binding to PtdIns4P required for Golgi targeting and function; tetramer formation required for function		0.0364503	-0.089141	0.0231715	0.105939	0.0256389	-0.123776	-0.09264	-0.131934	0.0361871	-0.335272	0.324334	-0.105118	0.0127685
YDR373W	FRQ1	851979	4	N-myristoylated calcium-binding protein that may have a role in intracellular signaling through its regulation of the phosphatidylinositol 4-kinase Pik1p; member of the recoverin/frequenin branch of the EF-hand superfamily		-0.0194194	-0.010277	0.0953965	0.270138	0.0767478	0.002395	-0.090204	0.0370195	0.0433826	-0.098672		0.0673419	-0.150146
YDR375C	BCS1	851981	4	Mitochondrial protein of the AAA ATPase family; has ATP-dependent chaperone activity; required for assembly of Rip1p and Qcr10p into cytochrome bc(1) complex; mutations in human homolog BCS1L are linked to neonatal mitochondrial diseases		0.0726763	0.096765	0.43423	0.099117	-0.0623608	0.580131	-0.033198		-0.577455	0.277463	0.291615	0.779972	0.0414015
YDR376W	ARH1	851982	4	Oxidoreductase of the mitochondrial inner membrane, involved in cytoplasmic and mitochondrial iron homeostasis and required for activity of Fe-S cluster-containing enzymes; one of the few mitochondrial proteins essential for viability		-0.0423427	-0.015859	0.204016	-0.098008	0.203174	0.204653	0.135602	0.250575	-0.383168	0.027629	0.278995	0.528383	-0.0322345
YDR377W	ATP17	851983	4	Subunit f of the F0 sector of mitochondrial F1F0 ATP synthase, which is a large, evolutionarily conserved enzyme complex required for ATP synthesis	F0/F1 ATP synthase (complex V)	-0.0198116	0.35432	0.0786015	-0.410359	-0.0440727	0.437302	0.271435	0.654496	-0.761415	0.43683	-0.402447	0.606987	-0.219418
YDR378C	LSM6	851984	4	Lsm (Like Sm) protein; part of heteroheptameric complexes (Lsm2p-7p and either Lsm1p or 8p): cytoplasmic Lsm1p complex involved in mRNA decay; nuclear Lsm8p complex part of U6 snRNP and possibly involved in processing tRNA, snoRNA, and rRNA	U6 snRNP complex|U4/U6 x U5 tri-snRNP complex	-0.0856516	-0.118498		0.250496	-0.139308	-0.039179	-0.018209	-0.277114	-0.117218	-0.098046	0.004677	-0.023794	0.0654565
YDR379C-A	YDR379C-A	851986	4	Protein involved in the assembly of the mitochondrial succinate dehydrogenase complex; mutations in human ortholog SDHAF1 are associated with infantile leukoencephalopathy		-0.0951874	0.554958	0.46697	-0.484508									0.226214
YDR379W	RGA2	851985	4	GTPase-activating protein for the polarity-establishment protein Cdc42p; implicated in control of septin organization, pheromone response, and haploid invasive growth; regulated by Pho85p and Cdc28p		-0.0680321	0.199937	0.31825	-0.043341	-0.430997	0.240449	-0.305625	-0.166211	-0.133144	-1.67626	-0.030313	0.280863	0.0481765
YDR381C-A	YDR381C-A	851989	4	Protein of unknown function, localized to the mitochondrial outer membrane		0.0284668	0.174066	0.108264	-0.081986	0.304442	0.359881	-0.013247	1.17523	-0.415698	0.568132	-0.340902	0.879723	0.106357
YDR381W	YRA1	851988	4	RNA binding protein required for export of poly(A)+ mRNA from the nucleus; proposed to couple mRNA export with 3' end processing via its interactions with Mex67p and Pcf11p; functionally redundant with Yra2p, another REF family member	transcription export complex	-0.0199391	0.034829	-0.143575	0.149819	-0.335239	-0.075748	-0.039826	-0.247398	0.157978	-0.064436	-0.227325	-0.183255	-0.0434765
YDR382W	RPP2B	851990	4	Ribosomal protein P2 beta, a component of the ribosomal stalk, which is involved in the interaction between translational elongation factors and the ribosome; regulates the accumulation of P1 (Rpp1Ap and Rpp1Bp) in the cytoplasm	cytoplasmic ribosomal large subunit	0.0655933	0.02131	-0.0415085	-0.189752	-0.0585468	-0.132364	-0.104815	0.259688	-0.0328664	-0.162155	-0.051387	-0.290306	-0.202169
YDR383C	NKP1	851991	4	Non-essential kinetochore protein, subunit of the Ctf19 central kinetochore complex (Ctf19p-Mcm21p-Okp1p-Mcm22p-Mcm16p-Ctf3p-Chl4p-Mcm19p-Nkp1p-Nkp2p-Ame1p-Mtw1p)		-0.0362711	-0.166288	-0.237085	0.151947	-0.228762	0.194351		-0.555925	0.15786	-0.227974	0.234689	0.103056	0.200201
YDR385W	EFT2	851993	4	Elongation factor 2 (EF-2), also encoded by EFT1; catalyzes ribosomal translocation during protein synthesis; contains diphthamide, the unique posttranslationally modified histidine residue specifically ADP-ribosylated by diphtheria toxin		0.0342915	-0.101951	-0.0760733	-0.320131	-0.0618062	-0.118437	-0.124264	-0.009176	-0.170044	-0.216186	-0.210063	-0.0290895	-0.155812
YDR386W	MUS81	851994	4	Subunit of the structure-specific Mms4p-Mus81p endonuclease that cleaves branched DNA; involved in DNA repair, replication fork stability, and joint molecule formation/resolution during meiotic recombination; helix-hairpin-helix protein	Holliday junction resolvase complex			0.482181						0.0595809	-0.931323		-0.040413	0.716004
YDR388W	RVS167	851996	4	Actin-associated protein, interacts with Rvs161p to regulate actin cytoskeleton, endocytosis, and viability following starvation or osmotic stress; homolog of mammalian amphiphysin	Rvs161p/Rvs167p complex	-0.035299	-0.015077	-0.0043665	-0.012814	-0.0624488	-0.093318	-0.019397	-0.329114	-0.138288	0.037508	-0.100544	0.136806	0.310144
YDR389W	SAC7	851997	4	GTPase activating protein (GAP) for Rho1p, involved in signaling to the actin cytoskeleton, null mutations suppress tor2 mutations and temperature sensitive mutations in actin; potential Cdc28p substrate		0.0093458	0.06761	-0.143744	0.195728	-0.193286	0.019178	0.100658	-0.388987	0.18828	0.169766	-0.624243	0.193421	0.238097
YDR390C	UBA2	851998	4	Subunit of a heterodimeric nuclear SUMO activating enzyme (E1) with Aos1p; activates Smt3p (SUMO) before its conjugation to proteins (sumoylation), which may play a role in protein targeting; essential for viability	Uba2p/Aos1p complex	0.0432733	-0.028426	-0.114201	0.194862	-0.182782	-0.101084	-0.050051	-0.205357	-0.0077855	-0.129592	-0.076267	-0.058351	-0.0456605
YDR391C	YDR391C	852000	4	Putative protein of unknown function, possibly involved in zinc homeostasis; Bdf1p-dependent transcription induced by salt stress; green fluorescent protein (GFP)-fusion protein localizes to both the cytoplasm and the nucleus		-0.283786	0.721174	-0.656361	-0.86519	1.07023	0.513599	0.430532	0.0095275	0.794531	0.946505	0.605315	0.416179	0.126265
YDR392W	SPT3	852001	4	Subunit of the SAGA and SAGA-like transcriptional regulatory complexes, interacts with Spt15p to activate transcription of some RNA polymerase II-dependent genes, also functions to inhibit transcription at some promoters	SAGA complex|SLIK (SAGA-like) complex	0.163431	0.019543	-0.0396435	0.225474	0.0113024	0.042344	-0.005125	-0.0032885	-0.393483	-0.116152	0.133095	0.003195	0.167727
YDR393W	SHE9	852002	4	Mitochondrial inner membrane protein required for normal mitochondrial morphology, may be involved in fission of the inner membrane; forms a homo-oligomeric complex		-0.0320622	0.100534	0.231104	-0.106596		0.309119	-0.153835	0.616926	-0.826871	0.308486	-0.262983	0.464485	-0.798352
YDR394W	RPT3	852003	4	One of six ATPases of the 19S regulatory particle of the 26S proteasome involved in the degradation of ubiquitinated substrates; substrate of N-acetyltransferase B	19/22S regulator	0.0512633	-0.204722	0.282376	0.029349	0.140638	0.135959	0.111701	-0.0127325	0.0636149	0.028207	0.376842	0.20169	0.0918425
YDR395W	SXM1	852004	4	Nuclear transport factor (karyopherin) involved in protein transport between the cytoplasm and nucleoplasm; similar to Nmd5p, Cse1p, Lph2p, and the human cellular apoptosis susceptibility protein, CAS1		0.0663213	-0.081479	-0.206559	-0.008558	-0.0835628	-0.107056	0.006636	-0.142182	0.342348	-0.218991	0.066547	-0.259266	-0.121042
YDR397C	NCB2	852006	4	Subunit of a heterodimeric NC2 transcription regulator complex with Bur6p; complex binds to TBP and can repress transcription by preventing preinitiation complex assembly or stimulate activated transcription; homologous to human NC2beta	NC2 complex	-0.0778738	0.056975	0.237939	0.247809	0.184281	0.076885	-0.134131	-0.146592	0.0449429	0.48486	-0.200144	-0.095539	-0.348296
YDR398W	UTP5	852007	4	Subunit of U3-containing Small Subunit (SSU) processome complex involved in production of 18S rRNA and assembly of small ribosomal subunit		0.0498523	-0.29117	-0.117696	0.008677	-0.043857	0.054658	0.069429	-0.0683205	0.271112	0.006001	-0.346281	-0.369341	0.0388965
YDR399W	HPT1	852008	4	Dimeric hypoxanthine-guanine phosphoribosyltransferase, catalyzes the formation of both inosine monophosphate and guanosine monophosphate; mutations in the human homolog HPRT1 can cause Lesch-Nyhan syndrome and Kelley-Seegmiller syndrome		-0.0152865	0.367889	0.194248	0.07717	0.328314	0.507493	0.0587751	0.416189	0.42271	0.119964	0.395261	-0.008501	0.124589
YDR400W	URH1	852009	4	Uridine nucleosidase (uridine-cytidine N-ribohydrolase), cleaves N-glycosidic bonds in nucleosides; involved in the pyrimidine salvage and nicotinamide riboside salvage pathways		0.0709453	0.336783	-0.0523865	-0.384893	0.47637	0.466515	-0.143314	-0.198246	0.973528	-0.175726	-0.646018	-0.012278	-0.281289
YDR404C	RPB7	852013	4	RNA polymerase II subunit B16; forms two subunit dissociable complex with Rpb4p; involved in recruitment of 3'-end processing factors to transcribing RNA polymerase II complex and in export of mRNA to cytoplasm under stress conditions	DNA-directed RNA polymerase II complex	0.101708	0.006378	-0.0478405	0.045762	-0.319248	-0.066286	-0.09217	-0.509609	-0.192587	-0.125389	-0.152797	0.018882	0.0771705
YDR405W	MRP20	852014	4	Mitochondrial ribosomal protein of the large subunit	mitochondrial ribosomal large subunit	-0.0136483	-0.103179	0.173853	0.103183	0.0152828	0.364048	0.205354	0.752416	-0.442717	0.624046	-0.216981	0.628356	-0.0523435
YDR406W	PDR15	852015	4	Plasma membrane ATP binding cassette (ABC) transporter, multidrug transporter and general stress response factor implicated in cellular detoxification; regulated by Pdr1p, Pdr3p and Pdr8p; promoter contains a PDR responsive element		-0.0408453	0.180942	-0.162629	0.029801	0.633144	0.950499	1.08406	0.0997115	0.212708	0.077761	0.597971	0.840713	-0.232651
YDR407C	TRS120	852016	4	One of 10 subunits of the transport protein particle (TRAPP) complex of the cis-Golgi which mediates vesicle docking and fusion; involved in endoplasmic reticulum (ER) to Golgi membrane traffic	TRAPP complex	0.0063408	0.071123	0.0073065	0.021264	-0.0885858	0.045012	0.239469	-0.263567	-0.075592	0.017045	-0.031895	0.154114	0.0242525
YDR408C	ADE8	852017	4	Phosphoribosyl-glycinamide transformylase, catalyzes a step in the 'de novo' purine nucleotide biosynthetic pathway		0.0357039	0.231999	-0.117183	0.122106	-0.134151	0.632836	-0.339468	0.126262	0.36864	0.003381	0.279335	-0.603167	-0.127113
YDR409W	SIZ1	852018	4	SUMO/Smt3 ligase that promotes the attachment of sumo (Smt3p; small ubiquitin-related modifier) to proteins; binds Ubc9p and may bind septins; specifically required for sumoylation of septins in vivo; localized to the septin ring			-0.110834	0.421332		-0.388794		-0.246659		0.0111643	-0.077131	-0.024652	0.0673381	-0.132189
YDR412W	RRP17	852021	4	Component of the pre-60S pre-ribosomal particle; required for cell viability under standard (aerobic) conditions but not under anaerobic conditions; exonuclease required for 5&#8242; end processing of pre-60S ribosomal RNA		0.0718253	0.057438	-0.0070055	0.111809	0.0219313	-0.081277	-0.089738	0.262068	0.0574819	0.253755	-0.123085	-0.207862	-0.0855665
YDR418W	RPL12B	852026	4	Protein component of the large (60S) ribosomal subunit, nearly identical to Rpl12Ap; rpl12a rpl12b double mutant exhibits slow growth and slow translation; has similarity to E. coli L11 and rat L12 ribosomal proteins	cytoplasmic ribosomal large subunit	0.0168853	-0.043679	-0.030951	-0.185988	-0.013132	-0.0580425	0.0556257	0.146663	0.0128615	-0.163526	-0.168636	-0.335747	-0.140338
YDR419W	RAD30	852028	4	DNA polymerase eta, involved in translesion synthesis during post-replication repair; catalyzes the synthesis of DNA opposite cyclobutane pyrimidine dimers and other lesions; mutations in human pol eta are responsible for XPV			0.855026		0.076871	-0.278894		0.197259	0.0091905	-0.710496	0.924849			-0.14312
YDR422C	SIP1	852032	4	Alternate beta-subunit of the Snf1p kinase complex, may confer substrate specificity; vacuolar protein containing KIS (Kinase-Interacting Sequence) and ASC (Association with Snf1 kinase Complex) domains involved in protein interactions	Snf1p/Snf4p/Sip1p complex	-0.0407609	0.061654	0.536154	-0.204836	0.0457752	-0.098861	-0.126306		-0.432507	-0.177121	-0.332413	0.105963	0.0764285
YDR423C	CAD1	852033	4	AP-1-like basic leucine zipper (bZIP) transcriptional activator involved in stress responses, iron metabolism, and pleiotropic drug resistance; controls a set of genes involved in stabilizing proteins; binds consensus sequence TTACTAA		-0.0181194	0.298302	-0.0979668		0.105768	-0.329834	-0.323433		-0.0275228	0.025169	-0.366908	-0.173167	0.410428
YDR424C	DYN2	852034	4	Cytoplasmic light chain dynein, microtubule motor protein; proposed to be involved in the assembly of the nuclear pore complex	cytoplasmic dynein complex	-0.156155	-0.073463	-0.0734563	-0.186205	0.171976	-0.188427	0.0615297	0.0888545	0.0050563	-0.095224	-0.151152	0.177506	0.111812
YDR425W	SNX41	852035	4	Sorting nexin, involved in the retrieval of late-Golgi SNAREs from the post-Golgi endosome to the trans-Golgi network; interacts with Snx4p	Atg20p/Snx4p/Snx41p complex	-0.284909	-0.05529	0.0024595	-0.2795	0.37519	0.08694	0.372452	-0.19384	0.166675	0.291893	-0.327997	0.366529	0.15418
YDR427W	RPN9	852037	4	Non-ATPase regulatory subunit of the 26S proteasome, has similarity to putative proteasomal subunits in other species; null mutant is temperature sensitive and exhibits cell cycle and proteasome assembly defects	19/22S regulator	-0.0433746	-0.052979	0.148409	0.093329	0.292152	0.080093	0.195764	0.0308965	0.378424	0.032709	0.24172	0.027972	0.0245475
YDR429C	TIF35	852039	4	eIF3g subunit of the core complex of translation initiation factor 3 (eIF3), which is essential for translation; stimulates resumption of ribosomal scanning during translation reinitiation	eIF3	0.0952593	-0.087297	0.0713745	-0.054666	0.0072031	-0.056271	-0.091574	0.0852235	0.0716829	-0.041345	-2.7e-05	-0.268578	-0.0562135
YDR430C	CYM1	852041	4	Lysine-specific metalloprotease of the mitochondrial intermembrane space, member of the pitrilysin family; degrades proteins and presequence peptides cleaved from imported proteins; required for normal mitochondrial morphology		-0.0054998	0.16081	0.174237	0.129009	0.216677	0.477124	0.0681449	0.757566	0.222767	0.531701	0.287289	0.583139	0.0459455
YDR432W	NPL3	852042	4	RNA-binding protein that promotes elongation, regulates termination, and carries poly(A) mRNA from nucleus to cytoplasm; required for pre-mRNA splicing; dissociation from mRNAs promoted by Mtr10p; phosphorylated by Sky1p in the cytoplasm		-0.110912	0.020488	0.0301115	-0.116519	0.0071948	0.019776	0.0532313	0.0200815	0.367094	0.059573	0.099266	-0.136593	-0.0633365
YDR434W	GPI17	852044	4	Transmembrane protein subunit of the glycosylphosphatidylinositol transamidase complex that adds GPIs to newly synthesized proteins; human PIG-Sp homolog	GPI-anchor transamidase complex	-0.0198533	0.013854	-0.174593	-0.037687	0.113526	0.52197	0.33723	-0.203657	0.145176	0.213797	-0.087993	0.037516	-0.0940095
YDR435C	PPM1	852045	4	Carboxyl methyltransferase, methylates the C terminus of the protein phosphatase 2A catalytic subunit (Pph21p or Pph22p), which is important for complex formation with regulatory subunits		0.545515	-0.068976	-0.0526885	0.663774		0.145845	-0.246142	-0.30808	-0.251636	0.381965		0.303423	0.830224
YDR436W	PPZ2	852046	4	Serine/threonine protein phosphatase Z, isoform of Ppz1p; involved in regulation of potassium transport, which affects osmotic stability, cell cycle progression, and halotolerance		-0.157039	0.300714	0.215429	0.00285		0.083712		0.0022785	-0.0014521	0.183356	-0.508841	0.710967	0.202642
YDR439W	LRS4	852049	4	Nucleolar protein that forms a complex with Csm1p, and then Mam1p at kinetochores during meiosis I to mediate accurate homolog segregation; required for condensin recruitment to the replication fork barrier site and rDNA repeat segregation	Csm1p/Lrs4p complex|monopolin complex	-0.240361		0.183412				-0.356646		0.20807	-0.077887	-0.595779	-0.056997	-0.0727105
YDR440W	DOT1	852050	4	Nucleosomal histone H3-Lys79 methylase; methylation is required for telomeric silencing, meiotic checkpoint control, and DNA damage response		-0.085892		0.449829	0.858584		-0.07459	0.153012	-0.0565795	-0.2478	0.259735	0.019387	0.276085	0.602227
YDR443C	SSN2	852053	4	Subunit of the RNA polymerase II mediator complex; associates with core polymerase subunits to form the RNA polymerase II holoenzyme; required for stable association of Srb10p-Srb11p kinase; essential for transcriptional regulation	Kornberg's mediator (SRB) complex	-0.0276337	-0.530538	-0.0105055	-0.430098	0.627024	-0.219588		-0.268742	-0.0157548	0.0541	0.161084	0.150611	-0.127534
YDR444W	YDR444W	852054	4	Putative protein of unknown function		0.10327	-0.108962	-0.134779	0.036572	-0.406588	-0.467855	-0.237139		-1.02939	-0.215941	0.068999	0.111647	0.311788
YDR447C	RPS17B	852058	4	Ribosomal protein 51 (rp51) of the small (40s) subunit; nearly identical to Rps17Ap and has similarity to rat S17 ribosomal protein	cytoplasmic ribosomal small subunit	-0.0004621	-0.040268	-0.0345	-0.303761	-0.0125678	-0.0704275	0.0780205	0.141626	0.0109781	-0.0994395	-0.25553	-0.386886	-0.15566
YDR448W	ADA2	852059	4	Transcription coactivator, component of the ADA and SAGA transcriptional adaptor/HAT (histone acetyltransferase) complexes	Ada2p/Gcn5p/Ada3 transcription activator complex|SAGA complex|SLIK (SAGA-like) complex	-0.0187555	0.029841	0.0737365	0.070379	-0.17753	-0.171098	0.0917874	-0.191734	-0.076854	0.058381	0.26964	0.01399	0.0078915
YDR449C	UTP6	852060	4	Nucleolar protein, component of the small subunit (SSU) processome containing the U3 snoRNA that is involved in processing of pre-18S rRNA	UTP B complex	0.0357242	-0.011463	-0.0148895	-0.01968	-0.0547188	-0.040861	0.384622	-0.0427785	0.0935929	-0.007253	-0.239503	-0.238028	0.0713455
YDR450W	RPS18A	852061	4	Protein component of the small (40S) ribosomal subunit; nearly identical to Rps18Bp and has similarity to E. coli S13 and rat S18 ribosomal proteins	cytoplasmic ribosomal small subunit	-0.0251757	-0.054582	-0.008555	-0.299074	0.0003883	-0.0630925	0.081518	0.124203	0.0073025	-0.0857405	-0.260926	-0.418858	-0.132064
YDR451C	YHP1	852062	4	One of two homeobox transcriptional repressors (see also Yox1p), that bind to Mcm1p and to early cell cycle box (ECB) elements of cell cycle regulated genes, thereby restricting ECB-mediated transcription to the M/G1 interval							0.107657	-0.391214		-0.709858	-0.504462		-0.160585	0.0200215
YDR452W	PPN1	852063	4	Vacuolar endopolyphosphatase with a role in phosphate metabolism; functions as a homodimer		-0.193276	-0.401932	-0.217043	0.213711	7.31e-05	-0.306231	-0.379434	-0.260876	-0.151823	-0.087778	0.088005	0.155905	-0.110642
YDR453C	TSA2	852064	4	Stress inducible cytoplasmic thioredoxin peroxidase; cooperates with Tsa1p in the removal of reactive oxygen, nitrogen and sulfur species using thioredoxin as hydrogen donor; deletion enhances the mutator phenotype of tsa1 mutants		-0.646464	0.995747	-0.0745578	-0.892997	1.76127	1.41847	0.873564	0.188204	0.386201	1.34196		0.509661	-1.88429
YDR454C	GUK1	852065	4	Guanylate kinase, converts GMP to GDP; required for growth and mannose outer chain elongation of cell wall N-linked glycoproteins		0.101655	-0.11018	0.0123935	-0.289941	-0.0916028	0.501394	0.024589	0.0464205	0.0836439	0.237376	-0.171376	-0.257692	-0.105697
YDR456W	NHX1	852066	4	Na+/H+ and K+/H+ exchanger, required for intracellular sequestration of Na+ and K+; located in the vacuole and late endosome compartments; required for osmotolerance to acute hypertonic shock and for vacuolar fusion		-0.0662415		-0.0155735	-0.227964		-0.310143	0.228196		-0.131005	-0.281897	0.092401	-0.301094	-0.0785115
YDR457W	TOM1	852068	4	E3 ubiquitin ligase of the hect-domain class; has a role in mRNA export from the nucleus and may regulate transcriptional coactivators; involved in degradation of excess histones		-0.0498204	0.07464	-0.0063485	-0.002376	0.21757	0.060754	0.267018	0.0543945	0.02334	0.045534	0.028553	0.183275	0.0107635
YDR458C	HEH2	852069	4	Inner nuclear membrane (INM) protein; contains helix-extension-helix (HEH) motif, nuclear localization signal sequence; targeting to the INM requires the Srp1p-Kap95p karyopherins and the Ran cycle		0.0182788	0.073618	-0.129504	-0.042283	-0.270164	0.176617	0.161334	0.0003405	0.0354386	0.217203	0.217622	-0.139305	0.0804425
YDR460W	TFB3	852071	4	Subunit of TFIIH and nucleotide excision repair factor 3 complexes, involved in transcription initiation, required for nucleotide excision repair; ring finger protein similar to mammalian CAK and TFIIH subunit	transcription factor TFIIH complex	0.0740923	-0.130766	0.0715795	0.120999	-0.0140972	0.214131	0.37566	-0.176767	0.137583	-0.182199	-0.075746	0.013563	0.30282
YDR461C-A	YDR461C-A	3799972	4	Putative protein of unknown function		-0.126554	-1.40492		1.82619		0.057552	-0.389117	0.0940255		0.499606	-0.320317	0.177645	0.375675
YDR462W	MRPL28	852073	4	Mitochondrial ribosomal protein of the large subunit	mitochondrial ribosomal large subunit	0.0034886	0.112474	0.138329	0.075878	-0.0522806	0.391417	-0.209333		-0.703341	0.381854		0.662926
YDR463W	STP1	852074	4	Transcription factor, undergoes proteolytic processing by SPS (Ssy1p-Ptr3p-Ssy5p)-sensor component Ssy5p in response to extracellular amino acids; activates transcription of amino acid permease genes and may have a role in tRNA processing		0.246009	0.366617	-0.488777	0.204172		-0.324878			0.1132		0.50951	0.154768	0.739866
YDR464W	SPP41	852075	4	Protein involved in negative regulation of expression of spliceosome components PRP4 and PRP3		-0.0878639	0.393309	0.103108	-0.035319	0.153037	0.093106	0.099681	-0.228849	-0.185202	0.257748	-0.267743	-0.411329	0.175864
YDR465C	RMT2	852076	4	Arginine N5 methyltransferase; methylates ribosomal protein Rpl12 (L12) on Arg67		0.125524	-0.028483	0.196238	-0.071887	0.0817858	-1.77664	0.268511	0.0235265	-0.853738	0.126287	-0.136927	-0.081592	-0.11766
YDR466W	PKH3	852077	4	Protein kinase with similarity to mammalian phosphoinositide-dependent kinase 1 (PDK1) and yeast Pkh1p and Pkh2p, two redundant upstream activators of Pkc1p; identified as a multicopy suppressor of a pkh1 pkh2 double mutant		0.0885353	0.183264	0.286096	-0.205139	0.122827	0.102839	-0.051644	-0.534703	-0.131298	-0.309833	-0.257527	0.186816	-0.0208305
YDR468C	TLG1	852079	4	Essential t-SNARE that forms a complex with Tlg2p and Vti1p and mediates fusion of endosome-derived vesicles with the late Golgi; binds the docking complex VFT (Vps fifty-three) through interaction with Vps51p			0.156165	-0.135397	-0.360493	-0.464158	0.233736	0.0738535	0.101525	0.0420352	0.082275	0.000374	0.482268	-0.0530835
YDR469W	SDC1	852080	4	Subunit of the COMPASS (Set1C) complex, which methylates lysine 4 of histone H3 and is required in chromatin silencing at telomeres; contains a Dpy-30 domain that mediates interaction with Bre2p; similar to C. elegans and human DPY-30	COMPASS complex	-0.0157199	0.036903	0.0877505	-0.275854	-0.0745498	-0.082146	-0.301314	0.198295	0.209899	-0.207364	0.012519	0.296153	-0.242825
YDR470C	UGO1	852081	4	Protein of unknown function; outer membrane component of the mitochondrial fusion machinery; Ugo1p bind directly to Fzo1p and Mgm1p and thereby link these two GTPases during mitochondrial fusion	Mgm1p/Ugo1p/Fzo1p complex	-0.0113186	0.01264	0.490861	-0.321876		0.290831	-0.054752	-0.163099	-0.767997	0.115549	0.183843	0.208772	-0.0673285
YDR471W	RPL27B	852082	4	Protein component of the large (60S) ribosomal subunit, nearly identical to Rpl27Ap and has similarity to rat L27 ribosomal protein	cytoplasmic ribosomal large subunit	0.0170885	-0.068177	-0.008519	-0.239111	-0.0392352	-0.0536735	-0.0093765	0.171056	-0.0368318	-0.170287	-0.209853	-0.330982	-0.159626
YDR472W	TRS31	852083	4	One of 10 subunits of the transport protein particle (TRAPP) complex of the cis-Golgi which mediates vesicle docking and fusion; involved in endoplasmic reticulum (ER) to Golgi membrane traffic	TRAPP complex	0.0661263	-0.030869	-0.092239	-0.118775	-0.244746	-0.355952	0.0532333	-0.205852	-0.199314	-0.159203	-0.414115	-0.268586	-0.0963755
YDR473C	PRP3	852084	4	Splicing factor, component of the U4/U6-U5 snRNP complex	U4/U6 x U5 tri-snRNP complex	0.0217508	-0.157299	-0.27207	0.480854	-0.192425	-0.150182	-0.143593	0.250951	-0.0189922	-0.11614	-0.044707	0.040743	0.520325
YDR475C	JIP4	852086	4	Protein of unknown function; previously annotated as two separate ORFs, YDR474C and YDR475C, which were merged as a result of corrections to the systematic reference sequence		-0.105843	0.399728	0.124704	0.026089	-0.0669648	0.089764	0.043394	-0.351064	-0.395057	0.431707	-0.538592	-0.096746	0.356913
YDR476C	YDR476C	852087	4	Putative protein of unknown function; green fluorescent protein (GFP)-fusion protein localizes to the endoplasmic reticulum; YDR476C is not an essential gene		-0.337759	-0.171246	-0.216268	-0.179754	0.0386941	0.161952	0.0332	-0.415391	0.0672389	-0.129032	0.120494	-0.258817	-0.0455585
YDR477W	SNF1	852088	4	AMP-activated serine/threonine protein kinase found in a complex containing Snf4p and members of the Sip1p/Sip2p/Gal83p family; required for transcription of glucose-repressed genes, thermotolerance, sporulation, and peroxisome biogenesis	Snf1p/Snf4p/Sip1p complex|Snf1p/Snf4p/Gal83p complex|Snf1p/Snf4p/Sip2p complex	-0.0225118	0.059857	0.135609	0.303241	-0.198118	-0.009371	-0.160311	0.186778	-0.189941	0.036195	0.026398	0.230693	0.0443235
YDR478W	SNM1	852089	4	Subunit of RNase MRP, which cleaves pre-rRNA and has a role in cell cycle-regulated degradation of daughter cell-specific mRNAs; binds to the NME1 RNA subunit of RNase MRP	ribonuclease MRP complex	0.142946	0.012558	-0.0257965	-0.525977	-0.0619338	-0.221048	-0.131354	-0.402564	0.0721639	0.0932158	0.145137	-0.181597	-0.161204
YDR479C	PEX29	852090	4	Peroxisomal integral membrane peroxin, involved in the regulation of peroxisomal size, number and distribution; genetic interactions suggest that Pex28p and Pex29p act at steps upstream of those mediated by Pex30p, Pex31p, and Pex32p				0.23225			0.059028	-0.134889		0.575535			0.524815
YDR480W	DIG2	852091	4	MAP kinase-responsive inhibitor of the Ste12p transcription factor, involved in the regulation of mating-specific genes and the invasive growth pathway; related regulators Dig1p and Dig2p bind to Ste12p	Dig1p/Ste12p/Dig2p complex	-0.0359802	-0.127912	0.311455	-0.037438	-0.242242	1.76375			-0.172626	0.184578		-0.227589	-0.135227
YDR481C	PHO8	852092	4	Repressible alkaline phosphatase, a glycoprotein localized to the vacuole; regulated by levels of inorganic phosphate and by a system consisting of Pho4p, Pho9p, Pho80p, Pho81p and Pho85p; dephosphorylates phosphotyrosyl peptides		0.343133	-0.040943	-0.0782511	0.127025	0.041947	-0.402414	0.049408	0.0963715	0.110362	-0.987283	-1.04673	-0.730332	-1.5898
YDR483W	KRE2	852094	4	Alpha1,2-mannosyltransferase of the Golgi involved in protein mannosylation		-0.0480682	0.022785	-0.113021	0.009079	-0.130255	0.091247	-0.03566	0.0846285	0.0764909	-0.324135	-0.359159	-0.067315	-0.0591325
YDR484W	VPS52	852095	4	Component of the GARP (Golgi-associated retrograde protein) complex, Vps51p-Vps52p-Vps53p-Vps54p, which is required for the recycling of proteins from endosomes to the late Golgi; involved in localization of actin and chitin	GARP complex	-0.0350574	-0.022344	-0.0031145	-0.031612	-0.0544784	-0.072715	0.034727	0.0588365	0.19112	0.081273	-0.054809	-0.147049	0.0659995
YDR485C	VPS72	852096	4	Htz1p-binding component of the SWR1 complex, which exchanges histone variant H2AZ (Htz1p) for chromatin-bound histone H2A; required for vacuolar protein sorting	Swr1p complex	-1.30492	-0.108936	-0.0350735	0.098886	0.102032	-0.235216	-0.186142	-0.499949	0.158108	0.185519	0.235287	-0.451041	0.0945635
YDR487C	RIB3	852098	4	3,4-dihydroxy-2-butanone-4-phosphate synthase (DHBP synthase), required for riboflavin biosynthesis from ribulose-5-phosphate, also has an unrelated function in mitochondrial respiration		0.218148	0.089719	-0.095187	0.381714	-0.177327	0.106348	-0.189067	0.768976	0.106444	-0.163259	0.699378	-0.047473	-0.417853
YDR489W	SLD5	852100	4	Subunit of the GINS complex (Sld5p, Psf1p, Psf2p, Psf3p), which is localized to DNA replication origins and implicated in assembly of the DNA replication machinery	GINS complex	-0.12247	-0.099896	0.212834		-0.176424	-0.044429	0.160328	-0.0195745	0.130769	-0.094453	0.071837	0.150602	-0.149632
YDR490C	PKH1	852101	4	Serine/threonine protein kinase involved in sphingolipid-mediated signaling pathway that controls endocytosis; activates Ypk1p and Ykr2p, components of signaling cascade required for maintenance of cell wall integrity; redundant with Pkh2p		0.126712	0.049946	0.129705	-0.072686	0.31857	0.021287	-0.008487	-0.139196	-0.386491	0.475649		0.469449	0.0255185
YDR493W	AIM8	852104	4	Mitochondrial matrix protein with a role in maintaining the labile mitochondrial zinc pool; null mutant has a respiratory growth defect and an elevated frequency of mitochondrial genome loss; overexpression causes cell cycle delay or arrest		0.0902303	0.126408	0.342886	0.333145	0.0363139	0.339926	-0.178431	0.995335	-0.754972	0.431695	0.191892	0.446351	-0.0709725
YDR494W	RSM28	852105	4	Mitochondrial ribosomal protein of the small subunit; genetic interactions suggest a possible role in promoting translation initiation		-0.0783316	0.180411	0.305849	0.083015	-0.0219729	0.397262	0.0543062	0.769896	-0.533016	0.572796	0.04836	0.557133	-0.11205
YDR495C	VPS3	852106	4	Component of CORVET tethering complex; cytoplasmic protein required for the sorting and processing of soluble vacuolar proteins, acidification of the vacuolar lumen, and assembly of the vacuolar H+-ATPase	CORVET complex	0.167567		-0.0354805	-0.024119	0.0950026	0.067134	-0.581026		-0.0750769	0.056909	-0.141312	0.037823	-0.0389395
YDR496C	PUF6	852107	4	Pumilio-homology domain protein that binds the 3' UTR of ASH1 mRNA and represses its translation, resulting in proper asymmetric localization of ASH1 mRNA; also co-sediments with the 60S ribosomal subunit and is required for its biogenesis		0.0352855	-0.019726	-0.0639983	-0.079279	0.0714612	-0.049639	0.222026	0.0799415	0.419662	0.047491	-0.240948	-0.470358	0.0361955
YDR497C	ITR1	852108	4	Myo-inositol transporter with strong similarity to the minor myo-inositol transporter Itr2p, member of the sugar transporter superfamily; expression is repressed by inositol and choline via Opi1p and derepressed via Ino2p and Ino4p		-0.125892	-0.190383	0.159017	-0.148379	-0.0606008	0.371005	-0.498469	0.781265	-0.400333	0.06031	-0.068004	0.208948	0.592898
YDR498C	SEC20	852109	4	Membrane glycoprotein v-SNARE involved in retrograde transport from the Golgi to the ER; required for N- and O-glycosylation in the Golgi but not in the ER; interacts with the Dsl1p complex through Tip20p	Dsl1p complex	-0.0836363	0.079103	0.0407815	-0.13323	0.0899427	0.292733	0.155968	-0.426886	0.297196	0.4051	1.51667	-0.048794	-0.191507
YDR499W	LCD1	852110	4	Essential protein required for the DNA integrity checkpoint pathways; interacts physically with Mec1p; putative homolog of S. pombe Rad26 and human ATRIP		0.381071	0.124962	-6.59373	0.139816	0.232153	0.302051	0.182594	-0.438831	-0.16275	0.023942	-0.139625	0.43509	-6.40957
YDR500C	RPL37B	852111	4	Protein component of the large (60S) ribosomal subunit, has similarity to Rpl37Ap and to rat L37 ribosomal protein	cytoplasmic ribosomal large subunit	-0.0555235	-0.060838	-0.115278	-0.328556	-0.151571	-0.094842	-0.050463	0.133734	-0.925809	-0.130802	-0.26269	-0.481097	-0.142545
YDR502C	SAM2	852113	4	S-adenosylmethionine synthetase, catalyzes transfer of the adenosyl group of ATP to the sulfur atom of methionine; one of two differentially regulated isozymes (Sam1p and Sam2p)		-0.0034717	-0.061247	-0.118135	-0.071695	-0.0461144	0.040409	-0.514123	0.0128085	0.232775	-0.133687	-0.380274	-0.108273	-0.312798
YDR505C	PSP1	852116	4	Asn and gln rich protein of unknown function; high-copy suppressor of POL1 (DNA polymerase alpha) and partial suppressor of CDC2 (polymerase delta) and CDC6 (pre-RC loading factor) mutations; overexpression results in growth inhibition		-0.0278987	0.366268	-0.0943359	0.217703	-0.0589448	0.347109	-0.161576	-0.119043	-0.11941	0.198622	0.210454	0.12661	0.131748
YDR507C	GIN4	852119	4	Protein kinase involved in bud growth and assembly of the septin ring, proposed to have kinase-dependent and kinase-independent activities; undergoes autophosphorylation; similar to Kcc4p and Hsl1p		-0.019374	0.134764	-0.0555135	0.115589	0.0026257	0.185234	-0.04769	0.0644035	0.0397448	-0.196297	0.005284	0.254612	-0.0186375
YDR508C	GNP1	852121	4	High-affinity glutamine permease, also transports Leu, Ser, Thr, Cys, Met and Asn; expression is fully dependent on Grr1p and modulated by the Ssy1p-Ptr3p-Ssy5p (SPS) sensor of extracellular amino acids		-0.178372	0.028099	0.125991	-0.399007	-0.007745	-0.229477	0.469447	-0.108415	0.314491	0.136196	-0.698232	-0.568364	0.0657665
YDR510W	SMT3	852122	4	Ubiquitin-like protein of the SUMO family, conjugated to lysine residues of target proteins; regulates chromatid cohesion, chromosome segregation, APC-mediated proteolysis, DNA replication and septin ring dynamics; phosphorylated at Ser2		-0.000553	-0.237823	-0.0003025	-0.09758	-0.0345602	0.264407	0.146901	-0.296859	0.148728	0.159498	-0.224309	-0.11997	-0.0358535
YDR511W	ACN9	852123	4	Protein of the mitochondrial intermembrane space, required for acetate utilization and gluconeogenesis; has orthologs in higher eukaryotes		-0.0193502	0.235846	-0.195476	0.144449	-0.043578	0.454366	-0.112631	0.920775	-0.308913	0.696557	-0.195809	0.667456	-0.0054055
YDR512C	EMI1	852125	4	Non-essential protein required for transcriptional induction of the early meiotic-specific transcription factor IME1, also required for sporulation; contains twin cysteine-x9-cysteine motifs		-0.113388	0.181357	0.36419	-0.24946		0.426199	-0.108663	1.34111	-0.574037	0.487697	0.484	1.04985	-0.0988235
YDR513W	GRX2	852124	4	Cytoplasmic glutaredoxin, thioltransferase, glutathione-dependent disulfide oxidoreductase involved in maintaining redox state of target proteins, also exhibits glutathione peroxidase activity, expression induced in response to stress		-0.247097	0.326909	0.203919	-0.663323	0.422316	0.806989	0.343919	-0.0096525	0.676076	1.08312	-0.077767	0.401619	-0.243674
YDR514C	YDR514C	852126	4	Putative protein of unknown function		0.262959	0.124024	0.134373	0.093742	0.0601931	0.052566	-0.140296	0.25282	-0.0642387	-0.33247	0.480302	-0.068372	0.371451
YDR515W	SLF1	852127	4	RNA binding protein that associates with polysomes; proposed to be involved in regulating mRNA translation; involved in the copper-dependent mineralization of copper sulfide complexes on cell surface in cells cultured in copper salts		0.0226252	-0.130217	0.349372	-0.080701	0.282535	0.242828	0.006399	0.640666	0.140296	0.38786	0.378466	0.55004	0.227151
YDR516C	EMI2	852128	4	Non-essential protein of unknown function required for transcriptional induction of the early meiotic-specific transcription factor IME1; required for sporulation; expression is regulated by glucose-repression transcription factors Mig1/2p		-0.219727	0.085961	-0.333593	-0.407454	0.110332	0.168688	-0.536354	-0.531972	0.289237	0.274241	-0.111241	0.278266	-0.37466
YDR517W	GRH1	852129	4	Acetylated, cis-golgi localized protein involved in ER to Golgi transport; homolog of human GRASP65; forms a complex with the coiled-coil protein Bug1p; mutants are compromised for the fusion of ER-derived vesicles with Golgi membranes	Grh1p/Bug1p complex	0.0002042	-0.150778	-0.182073	-0.019386	-0.016972	-0.137868	-0.205999	-0.347991	-0.311227	-0.164979	0.000614	0.133399	-0.0099765
YDR518W	EUG1	852130	4	Protein disulfide isomerase of the endoplasmic reticulum lumen, function overlaps with that of Pdi1p; may interact with nascent polypeptides in the ER		0.139465	-0.259844	-0.506323	-0.210691	0.366729	-0.08062	-0.179305	-0.181031	0.378517	-0.786991	0.071964	-0.027025	-0.0980285
YDR519W	FPR2	852131	4	Membrane-bound peptidyl-prolyl cis-trans isomerase (PPIase), binds to the drugs FK506 and rapamycin; expression pattern suggests possible involvement in ER protein trafficking		0.0445313	0.026522	0.0008335	-0.284373	0.302257	0.368393	-0.057199	0.532699	0.697935	0.487995	0.328711	0.410009	0.0368325
YDR520C	URC2	852133	4	Putative Zn(II)2Cys6 motif containing transcription factor; non-essential gene identified in a screen for mutants with increased levels of rDNA transcription; similar to S. kluyveri Urc2p involved in uracil catabolism		-0.0944418	0.117777	-0.0218925	0.265814	-0.131515	-0.263012	0.29987		0.0497949	-0.35368	-0.156685	-0.067203	0.0264205
YDR524C	AGE1	852136	4	ADP-ribosylation factor (ARF) GTPase activating protein (GAP) effector, involved in the secretory and endocytic pathways; contains C2C2H2 cysteine/histidine motif		0.0483713	-0.11593	-1.10533	-0.115205	-1.28527	0.008011	-0.172435	-0.50937	1.77814	-0.164992		0.0763714	0.266868
YDR527W	RBA50	852139	4	Protein involved in transcription; interacts with RNA polymerase II subunits Rpb2p, Rpb3, and Rpb11p; has similarity to human RPAP1		0.148289	-0.210088	0.0156035	-0.462593	-0.128736	-0.34101	0.0765087	-0.31881	-0.105529	-0.03971	-0.133178	-0.326164	-0.225873
YDR529C	QCR7	852142	4	Subunit 7 of the ubiquinol cytochrome-c reductase complex, which is a component of the mitochondrial inner membrane electron transport chain; oriented facing the mitochondrial matrix; N-terminus appears to play a role in complex assembly	Cytochrome bc1 complex (Ubiquinol-cytochrome c reductase complex, complex III)	0.017475	0.702576	0.365467	-0.358347	-0.264958	0.652477	0.194161	0.912356	-0.907458	0.639342	-0.586204	1.2548	-0.334178
YDR530C	APA2	852143	4	Diadenosine 5',5''-P1,P4-tetraphosphate phosphorylase II (AP4A phosphorylase), involved in catabolism of bis(5'-nucleosidyl) tetraphosphates; has similarity to Apa1p		0.0026918	0.169112	-0.257645	0.429984	-0.180314	0.263401	0.032291	-0.137233	0.0251832	-0.308325	-0.467042	0.218053	-0.445389
YDR531W	CAB1	852144	4	Pantothenate kinase (ATP:D-pantothenate 4'-phosphotransferase, EC 2.7.1.33); catalyzes the first committed step in the universal biosynthetic pathway for synthesis of coenzyme A (CoA)		0.309715	-0.163593	0.125566	0.724894	-1.02611	-0.185892	-0.170106	0.32706	-0.262043	-0.368238	0.328709	-0.074862	-0.0848325
YDR532C	YDR532C	852145	4	Subunit of a kinetochore-microtubule binding complex with Spc105p that bridges centromeric heterochromatin and kinetochore MAPs and motors, and is also required for sister chromatid bi-orientation and kinetochore binding of SAC components		-0.0330205	0.281053	-0.270334	0.221247	-0.493689	0.191111			-0.0030753	0.0890862	0.134442	0.059453	0.14752
YDR533C	HSP31	852146	4	Possible chaperone and cysteine protease with similarity to E. coli Hsp31; member of the DJ-1/ThiJ/PfpI superfamily, which includes human DJ-1 involved in Parkinson's disease; exists as a dimer and contains a putative metal-binding site		-0.818564	1.65953	-0.67476	-1.70255	1.10174	2.30032	1.04209	0.951825	1.97778	1.84823	-0.404473	-0.071224	-1.06387
YDR539W	YDR539W	852152	4	Ferulic acid decarboxylase, essential for decarboxylation of phenylacrylic acids; homolog of E. coli UbiD; green fluorescent protein (GFP)-fusion protein localizes to the cytoplasm		0.315208	-0.233236	-0.358456	-0.129752	0.0056574	-0.218452	-1.28586	0.0578185	-0.158583	-0.686639	0.40905	-0.386603	-0.164725
YDR545W	YRF1-1	852158	4	Helicase encoded by the Y' element of subtelomeric regions, highly expressed in the mutants lacking the telomerase component TLC1; potentially phosphorylated by Cdc28p		0.0048293	0.057956	-0.000308	-1.06842	0.0349518	-0.0411865	-0.255744	0.162062	0.02888	-0.357237	0.446439	-0.0163885	0.455606
YEL001C	IRC22	856717	5	Putative protein of unknown function; green fluorescent protein (GFP)-fusion localizes to the ER; YEL001C is non-essential; null mutant displays increased levels of spontaneous Rad52p foci		-0.0051311	-0.319369	0.154066	1.17523	-0.138014	-0.27834	-0.168199	0.279944	-0.123457	0.147519	0.319597	-0.054429	0.150511	1.17523
YEL002C	WBP1	856716	5	Beta subunit of the oligosaccharyl transferase (OST) glycoprotein complex; required for N-linked glycosylation of proteins in the endoplasmic reticulum	oligosaccharyl transferase complex	0.0108776	-0.004595	-0.0470645	0.611909	0.0476875	0.064695	0.227692	-0.0425975	0.0398297	0.128494	0.019828	-0.191894	0.0627565	0.611909
YEL003W	GIM4	856715	5	Subunit of the heterohexameric cochaperone prefoldin complex which binds specifically to cytosolic chaperonin and transfers target proteins to it	prefoldin complex	0.0771823	0.024288	0.0532855	0.428578	2.28383	-0.370981	-0.171942	-0.0691355	-0.313393	-0.237221	-0.123837	-0.09755	0.0698195	0.428578
YEL006W	YEA6	856712	5	Putative mitochondrial NAD+ transporter, member of the mitochondrial carrier subfamily (see also YIA6); has putative human ortholog			-0.821713	-0.220246	1.25742			-0.545207			-0.560885	-0.452039		-0.0461645	1.25742
YEL007W	YEL007W	856711	5	Putative protein with sequence similarity to S. pombe gti1+ (gluconate transport inducer 1)		0.0397683	0.030301	-0.147319	0.274598	-0.0766268	0.100984	-0.221012	-0.0241995	-0.184174	-0.032871	-0.060217	-0.213507	-0.0572285	0.274598
YEL009C	GCN4	856709	5	Basic leucine zipper (bZIP) transcriptional activator of amino acid biosynthetic genes in response to amino acid starvation; expression is tightly regulated at both the transcriptional and translational levels			0.747674	-0.32613	0.988814		0.058916	-0.2279	0.159722	1.10154	0.338563	2.05042		-0.638629	0.988814
YEL011W	GLC3	856705	5	Glycogen branching enzyme, involved in glycogen accumulation; green fluorescent protein (GFP)-fusion protein localizes to the cytoplasm in a punctate pattern		-0.90485	1.26298	-0.570142	0.517965	0.90433	1.26487	0.536393	-0.501497	0.820686	1.56684	-0.058101	0.357329	-1.31372	0.517965
YEL012W	UBC8	856704	5	Ubiquitin-conjugating enzyme that negatively regulates gluconeogenesis by mediating the glucose-induced ubiquitination of fructose-1,6-bisphosphatase (FBPase); cytoplasmic enzyme that catalyzes the ubiquitination of histones in vitro		-0.0355274	0.116542	0.13395	1.43965	0.252311	0.123801	0.246979	-0.480903	0.0698589	0.389437		0.600194	0.294753	1.43965
YEL013W	VAC8	856702	5	Phosphorylated and palmitoylated vacuolar membrane protein that interacts with Atg13p, required for the cytoplasm-to-vacuole targeting (Cvt) pathway; interacts with Nvj1p to form nucleus-vacuole junctions		0.0052873	0.021406	0.0613985	1.02046	-0.025752	0.048925	-0.015594	-0.111144	0.122117	-0.001062	0.191463	0.103094	0.0715825	1.02046
YEL015W	EDC3	856700	5	Non-essential conserved protein of unknown function, plays a role in mRNA decapping by specifically affecting the function of the decapping enzyme Dcp1p; localizes to cytoplasmic mRNA processing bodies		0.0186801	-0.030286	0.144483	1.1676	-0.252185	-0.141419	-0.054762	-0.262712	-0.137005	-0.162653	-0.365812	0.143068	0.151659	1.1676
YEL017W	GTT3	856698	5	Protein of unknown function with a possible role in glutathione metabolism, as suggested by computational analysis of large-scale protein-protein interaction data; GFP-fusion protein localizes to the nuclear periphery		0.106613	0.196438	0.248953	1.2892	-0.246255	-0.469307	0.192569	0.0409665	-0.609581	0.195629	-0.34654	-0.021831	-8.25e-05	1.2892
YEL018W	EAF5	856696	5	Esa1p-associated factor, non-essential subunit of the NuA4 acetyltransferase complex	NuA4 histone acetyltransferase complex	-0.0472571	0.187865	0.298658	0.699334	-0.151808	0.081708	-0.080831	-0.0402285	0.250903	0.015507	0.242365	-0.268534	0.147521	0.699334
YEL019C	MMS21	856695	5	SUMO ligase involved in chromosomal organization and DNA repair; essential subunit of the Mms21-Smc5-Smc6 complex; mutants are sensitive to methyl methanesulfonate and show increased spontaneous mutation and mitotic recombination	smc5p-Smc6p complex		-1.05141	0.143516	-0.634708		-1.64554	0.190145	0.446109	0.16653	0.207148	0.672908	2.19246		-0.634708
YEL020C	YEL020C	856694	5	Hypothetical protein with low sequence identity to Pdc1p		0.518461	0.375554		0.651554			0.452513		-0.159332	0.161428	0.441185	0.573175	1.63203	0.651554
YEL020W-A	TIM9	856693	5	Essential protein of the mitochondrial intermembrane space, forms a complex with Tim10p (TIM10 complex) that delivers hydrophobic proteins to the TIM22 complex for insertion into the inner membrane	mitochondrial intermembrane space protein transporter complex	0.0434703	0.224884	0.282091	1.08973	0.147359	0.394813	-0.064157	0.995026	-0.319161	0.346642	-0.047712	0.435953	0.19821	1.08973
YEL021W	URA3	856692	5	Orotidine-5'-phosphate (OMP) decarboxylase, catalyzes the sixth enzymatic step in the de novo biosynthesis of pyrimidines, converting OMP into uridine monophosphate (UMP); converts 5-FOA into 5-fluorouracil, a toxic compound		0.106023	3.30586	-0.562455	3.14981	3.36113	3.20863	2.84439	2.84332	3.32142	3.10796	2.72454	2.99617	3.14188	3.14981
YEL022W	GEA2	856691	5	Guanine nucleotide exchange factor for ADP ribosylation factors (ARFs), involved in vesicular transport between the Golgi and ER, Golgi organization, and actin cytoskeleton organization; similar to but not functionally redundant with Gea1p		-0.064685	0.047718	-0.0509015	1.12994	0.15075	0.092961	0.202307	-0.290677	-0.0680488	-0.00674	0.139749	-0.232582	-0.0871655	1.12994
YEL024W	RIP1	856689	5	Ubiquinol-cytochrome-c reductase, a Rieske iron-sulfur protein of the mitochondrial cytochrome bc1 complex; transfers electrons from ubiquinol to cytochrome c1 during respiration	Cytochrome bc1 complex (Ubiquinol-cytochrome c reductase complex, complex III)	-0.0271357	0.688943	0.330495	0.195957	-0.122005	0.725809	0.191476	0.985286	-1.08901	0.725668	-0.198184	1.27665	-0.24466	0.195957
YEL026W	SNU13	856687	5	RNA binding protein, part of U3 snoRNP involved in rRNA processing, part of U4/U6-U5 tri-snRNP involved in mRNA splicing, similar to human 15.5K protein	box C/D snoRNP complex|U4/U6 x U5 tri-snRNP complex	0.0646603	-0.05455	0.0065265	0.019509	0.0443106	-0.092218	-0.090825	0.150869	0.124582	-0.099236	-0.116996	-0.119905	-0.0364325	0.019509
YEL029C	BUD16	856683	5	Putative pyridoxal kinase, a key enzyme involved in pyridoxal 5'-phosphate synthesis, the active form of vitamin B6; required for genome integrity; involved in bud-site selection; similarity to yeast BUD17 and human pyridoxal kinase (PDXK)		0.132232	-0.262753	-0.0722742	1.3904	-0.129621	-0.280659	-0.13406	-0.0259085	-0.320953	-0.118655	3.91521	-0.118135	-0.0447385	1.3904
YEL030W	ECM10	856682	5	Heat shock protein of the Hsp70 family, localized in mitochondrial nucleoids, plays a role in protein translocation, interacts with Mge1p in an ATP-dependent manner; overexpression induces extensive mitochondrial DNA aggregations		0.0428043	-0.006896	0.0976135	-0.117383	0.148191	0.156608	0.891699	0.322325	-0.399987	0.143695	0.069401	0.212347	-0.255049	-0.117383
YEL031W	SPF1	856681	5	P-type ATPase, ion transporter of the ER membrane involved in ER function and Ca2+ homeostasis; required for regulating Hmg2p degradation; confers sensitivity to a killer toxin (SMKT) produced by Pichia farinosa KK1		-0.0028686	-0.053152	-0.0102605	1.12495	0.224333	0.084373	0.334469	0.0632185	0.158483	0.197271	0.239874	-0.345748	0.0554805	1.12495
YEL032W	MCM3	856680	5	Protein involved in DNA replication; component of the Mcm2-7 hexameric complex that binds chromatin as a part of the pre-replicative complex	Mcm2-7 complex	-0.0569455	0.139874	0.0040915	1.02909	-0.249212	0.042271	-0.139422	0.0055325	-0.300303	-0.069204	0.214063	-0.004343	0.0261305	1.02909
YEL034W	HYP2	856677	5	Translation elongation factor eIF-5A, previously thought to function in translation initiation; similar to and functionally redundant with Anb1p; structural homolog of bacterial EF-P; undergoes an essential hypusination modification		-0.0048907	-0.001963	0.172951	0.657934	-0.236853	-0.005178	-0.090456	-0.0236625	-0.270035	0.002983	-0.303304	-0.116463	0.0859905	0.657934
YEL036C	ANP1	856675	5	Subunit of the alpha-1,6 mannosyltransferase complex; type II membrane protein; has a role in retention of glycosyltransferases in the Golgi; involved in osmotic sensitivity and resistance to aminonitrophenyl propanediol	alpha-1,6-mannosyltransferase complex(Anp1p/Mnn9p)	-0.0426566	-0.083529	-0.146058	0.397664	-0.189469	-0.05418	0.048372	0.0004765	0.018786	-0.424598	-0.259147	-0.179094	-0.0309425	0.397664
YEL037C	RAD23	856674	5	Protein with ubiquitin-like N terminus, subunit of Nuclear Excision Repair Factor 2 (NEF2) with Rad4p that recognizes and binds damaged DNA; enhances protein deglycosylation activity of Png1p; homolog of human HR23A and HR23B	nucleotide-excision repair factor 2 complex|Png1p/Rad23p complex	0.0934633	-0.149872	0.193493	0.946964	0.003115	-0.082564	-0.221053	-0.0545975	0.0311032	-0.128527	0.496441	-0.142193	0.0350645	0.946964
YEL038W	UTR4	856673	5	Protein with sequence similarity to 2,3-diketo-5-methylthiopentyl-1-phosphate enolase-phosphatases, involved in methionine salvage; found in both the cytoplasm and nucleus		-0.0210732	0.032903	0.187036	0.761994	0.129201	0.656724	0.01488	0.0007805	0.308784	0.496044	0.238451	-0.356958	0.0196015	0.761994
YEL039C	CYC7	856672	5	Cytochrome c isoform 2, expressed under hypoxic conditions; electron carrier of the mitochondrial intermembrane space that transfers electrons from ubiquinone-cytochrome c oxidoreductase to cytochrome c oxidase during cellular respiration		-0.443739	0.659463	-0.185027	0.540351	0.510759	0.816029	-0.240024	0.323665	0.81401	1.07772	-0.259606	0.196187	-0.203849	0.540351
YEL040W	UTR2	856671	5	Chitin transglycosylase that functions in the transfer of chitin to beta(1-6) and beta(1-3) glucans in the cell wall; similar to and functionally redundant with Crh1; glycosylphosphatidylinositol (GPI)-anchored protein localized to bud neck		0.0153272	-0.224489	-0.0274285	1.1508	-0.193189	-0.214279	-0.182653	0.0907815	-0.0314393	-0.285373	-0.266333	-0.488395	0.33938	1.1508
YEL041W	YEF1	856670	5	ATP-NADH kinase; phosphorylates both NAD and NADH; homooctameric structure consisting of 60-kDa subunits; sequence similarity to Utr1p and Pos5p; overexpression complements certain pos5 phenotypes				0.0709705			-0.2786			0.194695
YEL042W	GDA1	856669	5	Guanosine diphosphatase located in the Golgi, involved in the transport of GDP-mannose into the Golgi lumen by converting GDP to GMP after mannose is transferred its substrate		-0.0601834	-0.038093	-0.219116	0.813924	-0.156646	0.000618	-0.035761	0.120138	-0.253594	0.0875232	-0.375887	-0.149807	-0.0720405	0.813924
YEL043W	YEL043W	856668	5	Predicted cytoskeleton protein involved in intracellular signalling based on quantitative analysis of protein-protein interaction maps; may interact with ribosomes, based on co-purification studies; contains fibronectin type III domain fold		0.0367213	-0.063816	0.157726	0.506811	-0.0958608	0.041074	0.176599	0.403263	-0.0088953	0.0244	-0.234793	-0.041855	-0.0853315	0.506811
YEL044W	IES6	856667	5	Protein that associates with the INO80 chromatin remodeling complex under low-salt conditions; human ortholog INO80C is a member of the human INO80 complex; implicated in DNA repair based on genetic interactions with RAD52 epistasis genes		0.149651	0.054458	-0.0722132	0.321579	0.236767	-0.008471	-0.139078	-0.0340845	0.225855	-0.216595	0.901298	0.017492	0.150992	0.321579
YEL046C	GLY1	856665	5	Threonine aldolase, catalyzes the cleavage of L-allo-threonine and L-threonine to glycine; involved in glycine biosynthesis		0.124341	0.102434	-0.309083	0.760404	-0.0654178	-0.137763	0.049994	0.228553	0.0140598	-0.019006	0.569248	-0.294022	0.0601125	0.760404
YEL047C	YEL047C	856664	5	Soluble fumarate reductase, required with isoenzyme Osm1p for anaerobic growth; may interact with ribosomes, based on co-purification experiments; authentic, non-tagged protein is detected in purified mitochondria in high-throughput studies		-0.0200881	0.082976	-0.545253	1.32078	-0.0008288	-0.152569	-0.543432	0.183293	1.0277	-0.378996	0.019991	0.256221	-0.54477	1.32078
YEL050C	RML2	856660	5	Mitochondrial ribosomal protein of the large subunit, has similarity to E. coli L2 ribosomal protein; fat21 mutant allele causes inability to utilize oleate and may interfere with activity of the Adr1p transcription factor	mitochondrial ribosomal large subunit	0.0627193	0.217312	0.296382	0.060167	0.13954	0.472927	0.02426	0.948106	-0.607344	0.511988	-0.104371	0.681182	-0.0611565	0.060167
YEL051W	VMA8	856659	5	Subunit D of the eight-subunit V1 peripheral membrane domain of the vacuolar H+-ATPase (V-ATPase), an electrogenic proton pump found throughout the endomembrane system; plays a role in the coupling of proton transport and ATP hydrolysis	H+-transporting ATPase, vacuolar|H+-transporting ATPase, Golgi	0.0626133	-0.141987	-0.205349	0.498296	-0.107527	0.016372	-0.110836	-0.0442315	0.0073498	-0.443563	-0.1986	-0.230527	-0.145289	0.498296
YEL052W	AFG1	856658	5	Conserved protein that may act as a chaperone in the degradation of misfolded or unassembled cytochrome c oxidase subunits; localized to matrix face of the mitochondrial inner membrane; member of the AAA family but lacks a protease domain		0.209566	-0.000255	-0.184193	0.806194	-0.153133	-0.11093	-0.030694	-0.448558	-0.837464	0.216588	-0.246456	0.217614	-0.282227	0.806194
YEL053C	MAK10	856657	5	Non-catalytic subunit of N-terminal acetyltransferase of the NatC type, required for replication of dsRNA virus; expression is glucose-repressible	NatC complex	-0.323199	0.424035	0.22687	1.06079	0.407846	0.444125	1.06376	0.0908765	0.639099	0.233588		0.047278	-0.209203	1.06079
YEL054C	RPL12A	856656	5	Protein component of the large (60S) ribosomal subunit, nearly identical to Rpl12Bp; rpl12a rpl12b double mutant exhibits slow growth and slow translation; has similarity to E. coli L11 and rat L12 ribosomal proteins	cytoplasmic ribosomal large subunit	0.0158032	-0.040467	-0.026668	-0.180796	-0.0174355	-0.0518635	0.0574387	0.146985	0.0035829	-0.157592	-0.171403	-0.335381	-0.147421	-0.180796
YEL055C	POL5	856655	5	DNA Polymerase phi; has sequence similarity to the human MybBP1A and weak sequence similarity to B-type DNA polymerases, not required for chromosomal DNA replication; required for the synthesis of rRNA	UTP A complex	-0.0172269	-0.079264	0.0389895	1.0199	2.1e-06	0.019887	0.2174	-0.106714	-0.0922358	-0.153012	0.182168	-0.318127	-0.158652	1.0199
YEL056W	HAT2	856654	5	Subunit of the Hat1p-Hat2p histone acetyltransferase complex; required for high affinity binding of the complex to free histone H4, thereby enhancing Hat1p activity; similar to human RbAp46 and 48; has a role in telomeric silencing	HAT-B complex	0.0163816	0.024035	-0.125408	0.992234	-0.462104	-0.259385	-0.115997	-0.334359	-0.454087	-0.142528	-0.131875	0.118662	-0.179949	0.992234
YEL058W	PCM1	856652	5	Essential N-acetylglucosamine-phosphate mutase; converts GlcNAc-6-P to GlcNAc-1-P, which is a precursor for the biosynthesis of chitin and for the formation of N-glycosylated mannoproteins and glycosylphosphatidylinositol anchors		-0.0649193	0.023713	-0.0817977	1.06324	0.159547	0.270383	0.163109	0.0398105	0.38714	-0.223134	-0.126459	0.138765	0.174794	1.06324
YEL060C	PRB1	856649	5	Vacuolar proteinase B (yscB), a serine protease of the subtilisin family; involved in protein degradation in the vacuole and required for full protein degradation during sporulation; activity inhibited by Pbi2p		-0.455196	0.748197	-0.391757	0.267149	0.802003	1.0056	0.68501	-0.297419	1.07677	0.535121	0.278019	0.332772	-0.601125	0.267149
YEL061C	CIN8	856648	5	Kinesin motor protein involved in mitotic spindle assembly and chromosome segregation		-3.76146	0.171454	0.341163	1.09131	-0.0620748	-0.24468			-0.0740311	0.132918	0.126336	-0.42823	-0.0556115	1.09131
YEL062W	NPR2	856647	5	Component of an evolutionarily conserved Npr2/3 complex that mediates downregulation of TORC1 activity in response to amino acid limitation; homolog of human NPRL2; target of Grr1p (E3 ligase); required for growth on urea and proline		-0.155726	0.012201	-0.207926	0.644974	0.0925606	-0.154174	-0.12723	-0.399402	-0.256786	0.048869	-0.008188	0.128377	-0.211947	0.644974
YEL065W	SIT1	856644	5	Ferrioxamine B transporter, member of the ARN family of transporters that specifically recognize siderophore-iron chelates; transcription is induced during iron deprivation and diauxic shift; potentially phosphorylated by Cdc28p		0.258435		-1.72876	0.696434		1.18397			2.56765			-0.533942	-0.494253	0.696434
YEL066W	HPA3	856642	5	D-Amino acid N-acetyltransferase, catalyzes N-acetylation of D-amino acids through ordered bi-bi mechanism in which acetyl-CoA is first substrate bound and CoA is last product liberated; similar to Hpa2p, acetylates histones weakly in vitro		-0.028979	-0.487373	-0.233345	1.02705	-0.235258	-0.67968	-0.458158	-0.287439	-0.784162	-0.166235	-0.126613	0.476786	-0.376848	1.02705
YEL071W	DLD3	856638	5	D-lactate dehydrogenase, part of the retrograde regulon which consists of genes whose expression is stimulated by damage to mitochondria and reduced in cells grown with glutamate as the sole nitrogen source, located in the cytoplasm		0.242114	-0.5971	0.194597	1.55205	0.288057	-0.315863	-0.282006	-0.491558	0.485722	-0.669919	-0.930669	-0.6617	-0.331994	1.55205
YEL075C	YEL075C	856634	5	Putative protein of unknown function		-0.081097	0.040889	-0.324634	-1.31699	-0.120806	-0.165781	-0.513406	-0.357537	-0.668206	-0.237072	-0.089418		0.381915	-1.31699
YEL076C	YEL076C	856633	5	Putative protein of unknown function			0.081447		-0.99679					-0.278468			0.167491	0.106233	-0.99679
YEL076C-A	YEL076C-A	856632	5	Putative protein of unknown function			0.081447		-0.99679					-0.278468			0.167491	0.106233	-0.99679
YEL077C	YEL077C	856630	5	Helicase-like protein encoded within the telomeric Y' element		0.0037472	0.106438	-0.017302	-0.79391	0.0306483	-0.0227895	-0.0582475	0.226367	0.0616106	-0.355922	0.699464	-0.0160235	0.551523	-0.79391
YER001W	MNN1	856718	5	Alpha-1,3-mannosyltransferase, integral membrane glycoprotein of the Golgi complex, required for addition of alpha1,3-mannose linkages to N-linked and O-linked oligosaccharides, one of five S. cerevisiae proteins of the MNN1 family		-0.0870782	0.149067	-0.302304	0.808584	-0.661786	-0.050248	-0.194727	-0.0202325	-0.362496	-0.416176	-1.4106	-0.345963	-0.415457	0.808584
YER002W	NOP16	856719	5	Constituent of 66S pre-ribosomal particles, involved in 60S ribosomal subunit biogenesis		0.0303394	0.026312	-0.0712896	0.757254	0.120202	-0.029357	0.190799	0.271111	0.262192	0.128121	0.054836	-0.243574	0.14244	0.757254
YER003C	PMI40	856720	5	Mannose-6-phosphate isomerase, catalyzes the interconversion of fructose-6-P and mannose-6-P; required for early steps in protein mannosylation		0.0125463	-0.041315	-0.14796	0.859434	-0.117188	0.085776	-0.130022	0.0101705	-0.112435	0.033221	-0.270816	-0.240592	-0.131803	0.859434
YER004W	FMP52	856721	5	Protein of unknown function, localized to the mitochondrial outer membrane; induced by treatment with 8-methoxypsoralen and UVA irradiation		-0.0878034	0.218519	0.209743	1.04516	0.246755	0.360786	0.112292	0.700046	-0.0196133	0.253004	0.075579	0.02877	0.0737615	1.04516
YER005W	YND1	856722	5	Apyrase with wide substrate specificity, involved in preventing the inhibition of glycosylation by hydrolyzing nucleoside tri- and diphosphates which are inhibitors of glycotransferases; partially redundant with Gda1p		0.0789703	0.113124	-0.0277025	1.28514	-0.254919	-0.374362	0.00671	0.175951	-0.0649928		-0.964751	-0.203973	0.0087865	1.28514
YER006W	NUG1	856723	5	GTPase that associates with nuclear 60S pre-ribosomes, required for export of 60S ribosomal subunits from the nucleus		0.0210994	-0.055931	-0.179194	1.03586	-0.0609738	-0.117479	-0.01996	0.164882	0.286844	0.018023	0.161636	-0.185477	0.0227295	1.03586
YER007C-A	TMA20	856725	5	Protein of unknown function that associates with ribosomes and has a putative RNA binding domain; interacts with Tma22p; null mutant exhibits translation defects; has homology to human oncogene MCT-1		0.0233324	-0.289045	-0.0810518	0.777864	0.055052	-0.068484	-0.204556	0.0019735	0.27535	-0.153073	-0.132038	-0.325069	0.0328065	0.777864
YER007W	PAC2	856724	5	Microtubule effector required for tubulin heterodimer formation, binds alpha-tubulin, required for normal microtubule function, null mutant exhibits cold-sensitive microtubules and sensitivity to benomyl			0.021303	-0.0098515	0.612036			-0.026436		0.198064	0.028349		0.49351		0.612036
YER008C	SEC3	856726	5	Subunit of the exocyst complex (Sec3p, Sec5p, Sec6p, Sec8p, Sec10p, Sec15p, Exo70p, Exo84p) which mediates targeting of post-Golgi vesicles to sites of active exocytosis; Sec3p specifically is a spatial landmark for secretion	Exocyst complex	-0.0061183	0.027762	0.0171335	0.790744	0.085104	-0.122325	0.107358	-0.261602	0.240297	0.007953	-0.062179	-0.106724	-0.136201	0.790744
YER010C	YER010C	856728	5	Protein of unknown function, forms a ring-shaped homotrimer; has similarity to members of the prokaryotic rraA family; possibly involved in a phosphotransfer reaction		0.0430953	-0.319104	-0.0745349	1.15506	-0.190948	0.039478	-0.053662	-0.234963	-0.356683	-0.229631	0.07671	0.02342	-0.0888435	1.15506
YER012W	PRE1	856731	5	Beta 4 subunit of the 20S proteasome; localizes to the nucleus throughout the cell cycle	20S proteasome	0.0572543	-0.092759	0.350641	0.976294	0.267459	0.070921	-0.036625	0.0525465	0.001385	0.149256	0.25308	0.241012	0.246488	0.976294
YER013W	PRP22	856732	5	DEAH-box RNA-dependent ATPase/ATP-dependent RNA helicase, associates with lariat intermediates before the second catalytic step of splicing; mediates ATP-dependent mRNA release from the spliceosome and unwinds RNA duplexes		0.0183039	0.026492	-0.328632	1.19234	0.0490516	-0.005803	0.284043	0.897336	-0.102782	-0.099899	-0.002817	-0.142404	-0.0012795	1.19234
YER014W	HEM14	856733	5	Protoporphyrinogen oxidase, a mitochondrial enzyme that catalyzes the seventh step in the heme biosynthetic pathway, converting protoporphyrinogen IX to protoporphyrin IX; inhibited by diphenyl ether-type herbicides		-0.0859202	-0.067041	-0.26691	0.854584	0.145133	0.111296	-0.05152	0.216087	0.0150202	-0.170461	0.366236	0.469344	-0.0685335	0.854584
YER015W	FAA2	856734	5	Medium chain fatty acyl-CoA synthetase, activates imported fatty acids; accepts a wide range of fatty acid chain lengths with a preference for medium chains, C9:0-C13:0; localized to the peroxisome		-0.0866638	0.512291		1.06207			0.572452							1.06207
YER016W	BIM1	856736	5	Microtubule-binding protein that together with Kar9p makes up the cortical microtubule capture site and delays the exit from mitosis when the spindle is oriented abnormally		-0.0100495	0.075355	-0.0532215	1.06137	-0.0826238	-0.224321	-0.210072	-0.132839	-0.48722	-0.035718	0.023474	0.209218	0.0456815	1.06137
YER017C	AFG3	856737	5	Component, with Yta12p, of the mitochondrial inner membrane m-AAA protease that mediates degradation of misfolded or unassembled proteins and is also required for correct assembly of mitochondrial enzyme complexes	m-AAA complex	0.0499463	0.159186	0.246279	0.566818	0.134086	0.47319	0.0952787	0.499629	-0.315396	0.47503	0.167452	0.567525	0.162568	0.566818
YER019W	ISC1	856739	5	Mitochondrial membrane localized inositol phosphosphingolipid phospholipase C, hydrolyzes complex sphingolipids to produce ceramide; activated by phosphatidylserine, cardiolipin, and phosphatidylglycerol; mediates Na+ and Li+ halotolerance		-0.206642	0.103767	0.247428	0.834284	-0.120556	0.033314	0.509353	0.0104015	0.234901	0.053723	-0.692222	-0.204559	0.173383	0.834284
YER020W	GPA2	856741	5	Nucleotide binding alpha subunit of the heterotrimeric G protein that interacts with the receptor Gpr1p, has signaling role in response to nutrients; green fluorescent protein (GFP)-fusion protein localizes to the cell periphery		-0.133532	0.270944	-0.0662549	0.825254	0.0567052	0.188242	-0.186196	-0.430349	0.0401943	0.079958	-0.419925	-0.071507	-0.144746	0.825254
YER021W	RPN3	856742	5	Essential, non-ATPase regulatory subunit of the 26S proteasome lid, similar to the p58 subunit of the human 26S proteasome; temperature-sensitive alleles cause metaphase arrest, suggesting a role for the proteasome in cell cycle control	19/22S regulator	0.0228074	-0.021542	0.291729	0.51359	-0.0050333	-0.001595	0.125157	-0.0029365	0.211155	0.055164	0.111437	0.122491	0.0926165	0.51359
YER022W	SRB4	856743	5	Subunit of the RNA polymerase II mediator complex; associates with core polymerase subunits to form the RNA polymerase II holoenzyme; essential for transcriptional regulation; similar to the human MED17 gene	Kornberg's mediator (SRB) complex	-0.0679314	0.065193	-0.0348995	0.623955	-0.0639598	-0.020307	0.454784	-0.286395	0.0108011	-0.050542	-0.220765	-0.062696	-0.0035275	0.623955
YER023W	PRO3	856744	5	Delta 1-pyrroline-5-carboxylate reductase, catalyzes the last step in proline biosynthesis		0.0055024	-0.158733	-0.0269115	1.05989	-0.110706	-0.095729	-0.184581	-0.0547365	0.0556319	-0.277453	-0.148328	-0.350767	-0.0035755	1.05989
YER024W	YAT2	856745	5	Carnitine acetyltransferase; has similarity to Yat1p, which is a carnitine acetyltransferase associated with the mitochondrial outer membrane		0.680037	-0.068706	0.593739	2.30416	-0.616823	-0.793808	-0.63748	0.146777	0.402705	0.35803	-0.361064	-0.368392	-1.34714	2.30416
YER025W	GCD11	856746	5	Gamma subunit of the translation initiation factor eIF2, involved in the identification of the start codon; binds GTP when forming the ternary complex with GTP and tRNAi-Met	eIF2|multi-eIF complex	0.0802603	-0.165557	-0.0257305	0.756094	-0.236126	-0.16499	-0.089405	0.0924125	0.14892	-0.084526	0.002591	-0.249259	0.0181545	0.756094
YER027C	GAL83	856749	5	One of three possible beta-subunits of the Snf1 kinase complex, allows nuclear localization of the Snf1 kinase complex in the presence of a nonfermentable carbon source; contains glycogen-binding domain	Snf1p/Snf4p/Gal83p complex	-0.017884	0.03698	0.0213675	0.573948	0.0672077	-0.088686	-0.210583	-0.0182405	-0.24911	0.111765	0.054421	0.116925	-0.12888	0.573948
YER029C	SMB1	856751	5	Core Sm protein Sm B; part of heteroheptameric complex (with Smd1p, Smd2p, Smd3p, Sme1p, Smx3p, and Smx2p) that is part of the spliceosomal U1, U2, U4, and U5 snRNPs; homolog of human Sm B and Sm B'	commitment complex|U5 snRNP complex|U4/U6 x U5 tri-snRNP complex|U2 snRNP complex|U1 snRNP complex	0.26678	-0.00722	0.0913815	0.675214	-0.51931	-0.223842	-0.194442	0.166216	-0.0583555	-0.309699		0.101669	0.827323	0.675214
YER030W	CHZ1	856752	5	Histone chaperone for Htz1p/H2A-H2B dimer; required for the stabilization of the Chz1p-Htz1-H2B complex; has overlapping function with Nap1p; null mutant displays weak sensitivity to MMS and benomyl; contains a highly conserved CHZ motif	Chz1p/Htz1p/Htb1p complex	0.152842	0.149736	0.155153	0.608356		0.052247	-0.209563	-0.0391355	0.114255	0.486343	0.417959	0.281018	-0.211759	0.608356
YER031C	YPT31	856753	5	Rab family GTPase, very similar to Ypt32p; involved in the exocytic pathway; mediates intra-Golgi traffic or the budding of post-Golgi vesicles from the trans-Golgi		-0.0172568	-0.22934	0.0652955	0.850344	0.0489196	0.014724	-0.019101	-0.0294685	-0.0116839	-0.193243	-0.241109	-0.077635	0.115005	0.850344
YER032W	FIR1	856754	5	Protein involved in 3' mRNA processing, interacts with Ref2p; potential Cdc28p substrate		0.0010699	0.101256	0.0566795	0.942134	0.438912		0.273644		-0.207023		0.071154	-0.010223	-0.0240675	0.942134
YER033C	ZRG8	856755	5	Protein of unknown function; authentic, non-tagged protein is detected in highly purified mitochondria in high-throughput studies; GFP-fusion protein is localized to the cytoplasm; transcription induced under conditions of zinc deficiency		0.133712	-0.298175	-0.0496865	0.931754		-0.223506	-0.111148		-0.0105639	0.430469	-0.500346	0.479373	0.22529	0.931754
YER034W	YER034W	856756	5	Putative protein of unknown function; non-essential gene; expression induced upon calcium shortage		-0.0986873	-0.107219	-0.0073075	1.46031	0.114479	-0.024066	-0.183681	-0.131176	-0.166152	0.264521	-0.105862	0.0826119	0.0627415	1.46031
YER036C	ARB1	856758	5	ATPase of the ATP-binding cassette (ABC) family involved in 40S and 60S ribosome biogenesis, has similarity to Gcn20p; shuttles from nucleus to cytoplasm, physically interacts with Tif6p, Lsg1p		0.0812063	-0.093147	0.0649445	0.789974	-0.0680478	-0.106407	-0.004305	0.0658145	0.018687	-0.07748	-0.404715	-0.599564	-0.199604	0.789974
YER037W	PHM8	856759	5	Protein of unknown function, expression is induced by low phosphate levels and by inactivation of Pho85p		-0.210433	0.195311	0.382521	0.140501		0.677369		0.161995	-1.24554	-0.454095		1.36351	-0.700762	0.140501
YER040W	GLN3	856763	5	Transcriptional activator of genes regulated by nitrogen catabolite repression (NCR), localization and activity regulated by quality of nitrogen source		0.0749563	0.210415	0.0957865	1.22502	0.316928	-0.033622	-0.288691	0.51044	-0.205139	0.142728	0.34934	-0.164031	-0.0155145	1.22502
YER042W	MXR1	856765	5	Methionine-S-sulfoxide reductase, involved in the response to oxidative stress; protects iron-sulfur clusters from oxidative inactivation along with MXR2; involved in the regulation of lifespan		0.492239	0.040231	0.113127	1.24536	0.316136	0.163693	-0.170384	0.959585	0.0528119	0.8787	0.791958	1.17317	-0.0784965	1.24536
YER043C	SAH1	856766	5	S-adenosyl-L-homocysteine hydrolase, catabolizes S-adenosyl-L-homocysteine which is formed after donation of the activated methyl group of S-adenosyl-L-methionine (AdoMet) to an acceptor		0.010668	-0.206321	0.0369605	0.895114	-0.0210357	0.070876	-0.454675	0.242641	0.0334792	-0.300444	-0.221194	-0.216955	0.172788	0.895114
YER044C	ERG28	856767	5	Endoplasmic reticulum membrane protein, may facilitate protein-protein interactions between the Erg26p dehydrogenase and the Erg27p 3-ketoreductase and/or tether these enzymes to the ER, also interacts with Erg6p		-0.244111	-0.402677	-0.453908	0.879594	-0.193285	0.12913	0.139106	-0.0785185	0.417168	-0.715909	-0.582528	-1.60938	-0.255778	0.879594
YER047C	SAP1	856771	5	Putative ATPase of the AAA family, interacts with the Sin1p transcriptional repressor in the two-hybrid system		0.130291	0.204063	0.0887985	1.11595	-0.166	-0.041036	-0.278513	-0.453148	0.0793419	0.180094	-0.236184	0.198261	0.0612705	1.11595
YER048C	CAJ1	856772	5	Nuclear type II J heat shock protein of the E. coli dnaJ family, contains a leucine zipper-like motif, binds to non-native substrates for presentation to Ssa3p, may function during protein translocation, assembly and disassembly		0.0648453	-0.082134	-0.0341315	1.0143	-0.168678	0.005369	-0.195433	-0.172362	-0.214295	-0.083366	-0.109124	-0.115997	0.133221	1.0143
YER048W-A	ISD11	856774	5	Protein required for mitochondrial iron-sulfur cluster biosynthesis	Nfs1p/Isd11p complex	-0.0335888	0.086672	-0.11619	0.461316	0.0244877	0.114264	0.115259	0.0188845	-0.0602538	0.047073	-0.115011	0.23259	0.0570545	0.461316
YER049W	TPA1	856775	5	Poly(rA)-binding protein involved in translation termination efficiency, mRNA poly(A) tail length and mRNA stability; interacts with Sup45p (eRF1), Sup35p (eRF3) and Pab1p; similar to prolyl 4-hydroxylases; binds Fe(III) and 2-oxoglutarate		0.0823483	-0.146805	-0.0579345	0.919674	-0.182906	-0.05805	-0.038169	0.0827065	0.0114141	-0.305643	-0.316404	-0.588349	-0.113483	0.919674
YER050C	RSM18	856776	5	Mitochondrial ribosomal protein of the small subunit, has similarity to E. coli S18 ribosomal protein	mitochondrial ribosomal small subunit	-0.0757256	0.262052	0.547911	0.462706		0.364669	0.180136		-0.413078	0.529423	-0.22884	0.585175	-0.245514	0.462706
YER052C	HOM3	856778	5	Aspartate kinase (L-aspartate 4-P-transferase); cytoplasmic enzyme that catalyzes the first step in the common pathway for methionine and threonine biosynthesis; expression regulated by Gcn4p and the general control of amino acid synthesis		0.437471	0.317795	0.131333	1.25353	-0.16374	-0.11892	-0.341201	0.560534	0.359475	-0.347553	0.601149	-0.455899	-0.485015	1.25353
YER053C	PIC2	856779	5	Mitochondrial phosphate carrier, imports inorganic phosphate into mitochondria; functionally redundant with Mir1p but less abundant than Mir1p under normal conditions; expression is induced at high temperature		-0.546047	1.69268	-0.208938	0.251699	-4.06088	1.72704	1.03242	0.52196	0.83058	2.21318	0.593354	0.59478	-0.735065	0.251699
YER054C	GIP2	856781	5	Putative regulatory subunit of the protein phosphatase Glc7p, involved in glycogen metabolism; contains a conserved motif (GVNK motif) that is also found in Gac1p, Pig1p, and Pig2p				-0.850872									0.727027
YER055C	HIS1	856782	5	ATP phosphoribosyltransferase, a hexameric enzyme, catalyzes the first step in histidine biosynthesis; mutations cause histidine auxotrophy and sensitivity to Cu, Co, and Ni salts; transcription is regulated by general amino acid control		0.170155	0.38102	0.0357955	1.43713	-0.228713	0.008364	-0.27779	0.28242	0.0423929	-0.375097	0.504144	-0.615903	-0.2865	1.43713
YER056C	FCY2	856783	5	Purine-cytosine permease, mediates purine (adenine, guanine, and hypoxanthine) and cytosine accumulation		-0.347286	0.677039	-0.111258	1.05118	0.0786476	0.30245	0.85041	0.0674455	0.944227	0.104363	-0.433903	-0.793227	-0.428795	1.05118
YER056C-A	RPL34A	856784	5	Protein component of the large (60S) ribosomal subunit, nearly identical to Rpl34Bp and has similarity to rat L34 ribosomal protein	cytoplasmic ribosomal large subunit	0.0352155	-0.13634	-0.036872	-0.295725	-0.008162	-0.0180675	-0.0310455	0.17148	-0.02682	-0.160589	-0.243707	-0.383466	-0.152861	-0.295725
YER057C	HMF1	856785	5	Member of the p14.5 protein family with similarity to Mmf1p, functionally complements Mmf1p function when targeted to mitochondria; heat shock inducible; high-dosage growth inhibitor; forms a homotrimer in vitro		0.137147	0.135973	0.0331765	0.437989	0.285816	0.379538	-0.011949	0.0022315	0.747823	-0.161496	-0.160005	0.38813	-0.728911	0.437989
YER058W	PET117	856786	5	Protein required for assembly of cytochrome c oxidase				0.654946	0.841924	-0.017182	0.390002	-0.145234	1.25072	-0.84344	0.507524		0.79413	0.0391365	0.841924
YER059W	PCL6	856787	5	Pho85p cyclin of the Pho80p subfamily; forms the major Glc8p kinase together with Pcl7p and Pho85p; involved in the control of glycogen storage by Pho85p; stabilized by Elongin C binding		-0.103869	-0.00738	-0.35227	0.880664	-0.858689	-0.322441	-0.166592	0.0807315	-0.349592	0.020185	-0.339506	0.066978	0.227885	0.880664
YER061C	CEM1	856790	5	Mitochondrial beta-keto-acyl synthase with possible role in fatty acid synthesis; required for mitochondrial respiration		0.118036	-0.152447	-0.3183	1.31002	-0.165792	-0.147415	-0.670364	-0.105607	-0.560722	-0.364047	-0.191829	-0.078546	-0.484083	1.31002
YER062C	HOR2	856791	5	One of two redundant DL-glycerol-3-phosphatases (RHR2/GPP1 encodes the other) involved in glycerol biosynthesis; induced in response to hyperosmotic stress and oxidative stress, and during the diauxic transition		-0.0911242	0.249671	0.207917	0.123642	0.175681	0.835439	-0.23124	-0.145935	0.353491	0.548144	-1.60978	0.136381	-0.10338	0.123642
YER063W	THO1	856792	5	Conserved nuclear RNA-binding protein; specifically binds to transcribed chromatin in a THO- and RNA-dependent manner, genetically interacts with shuttling hnRNP NAB2; overproduction suppresses transcriptional defect caused by hpr1 mutation		0.0467013	-0.101465	0.14474	0.878554	-0.381516	-0.192787	-0.772545	-0.153093	-0.843586	-0.063185	-0.185095	0.020651	0.0894185	0.878554
YER064C	YER064C	856793	5	Non-essential nuclear protein; null mutation has global effects on transcription		0.0627813	0.200823	0.240111			-0.280246	0.565299	2.64005	0.704406	0.375373		-0.295774	0.240186
YER065C	ICL1	856794	5	Isocitrate lyase, catalyzes the formation of succinate and glyoxylate from isocitrate, a key reaction of the glyoxylate cycle; expression of ICL1 is induced by growth on ethanol and repressed by growth on glucose		-0.375838	1.93032	-0.399274	-0.452269	0.325753	1.59339	1.32414	0.383505	2.49822	1.46506	-0.030261	0.573987	-1.66984	-0.452269
YER067W	YER067W	856797	5	Protein of unknown function involved in energy metabolism under respiratory conditions; protein abundance is increased upon intracellular iron depletion		-1.02112	1.82973	-0.572375	-0.308933	0.839616	1.5562	0.131078	0.0506615	2.18756	0.864736	0.137775	1.49088	-1.75629	-0.308933
YER068W	MOT2	856799	5	Subunit of the CCR4-NOT complex, which has roles in transcription regulation, mRNA degradation, and post-transcriptional modifications; with Ubc4p, ubiquitinates nascent polypeptide-associated complex subunits and histone demethyase Jhd2p	CCR4-NOT core complex	0.0040816	-0.058917	-0.0198035	0.216795	-0.0828958	-0.05497	-0.154151	-0.0625925	0.135073	-0.084087	-0.057055	0.054157	0.0584285	0.216795
YER069W	ARG5	856800	5	Protein that is processed in the mitochondrion to yield acetylglutamate kinase and N-acetyl-gamma-glutamyl-phosphate reductase, which catalyze the 2nd and 3rd steps in arginine biosynthesis; enzymes form a complex with Arg2p	Arg2p/Arg5,6p complex	0.0348444	0.153377	-0.351631	0.692504	-0.226782	-0.005071	-0.134251	-0.272022	-0.63632	-0.293979	0.633399	-0.676156	-0.160177	0.692504
YER070W	RNR1	856801	5	Major isoform of the large subunit of ribonucleotide-diphosphate reductase; the RNR complex catalyzes rate-limiting step in dNTP synthesis, regulated by DNA replication and DNA damage checkpoint pathways via localization of small subunits	ribonucleoside-diphosphate reductase complex	-0.100798	0.166031	-0.154251	0.738454	-0.230615	0.172494	-0.111974	0.0153585	-0.171709	0.015467	-0.165051	-0.264918	-0.219642	0.738454
YER071C	YER071C	856802	5	Protein of unknown function; green fluorescent protein (GFP)-fusion protein localizes to the cytoplasm in a punctate pattern		-0.0657714	-0.28747	-0.109176	0.784834		-0.120981	-0.09801		-0.271693	0.020347	0.096101	0.115761	0.2838	0.784834
YER073W	ALD5	856804	5	Mitochondrial aldehyde dehydrogenase, involved in regulation or biosynthesis of electron transport chain components and acetate formation; activated by K+; utilizes NADP+ as the preferred coenzyme; constitutively expressed		0.685898	0.281706	-0.116017	1.59829	-0.325912	-0.41384	-0.402634	0.554372	-0.473688	-0.302918	0.38752	-0.548824	-0.0343355	1.59829
YER074W	RPS24A	856805	5	Protein component of the small (40S) ribosomal subunit; identical to Rps24Bp and has similarity to rat S24 ribosomal protein	cytoplasmic ribosomal small subunit	0.0061956	-0.058831	0.003629	-0.242536	-0.0283637	-0.0579665	0.100066	0.102148	-0.0172372	-0.15263	-0.216558	-0.293926	-0.1419	-0.242536
YER075C	PTP3	856807	5	Phosphotyrosine-specific protein phosphatase involved in the inactivation of mitogen-activated protein kinase (MAPK) during osmolarity sensing; dephosporylates Hog1p MAPK and regulates its localization; localized to the cytoplasm		0.121549	0.138699	-0.508028	0.683404	-0.149254	-0.278884	0.532598	-0.417259	-0.724451	0.414924	-0.687997	-1.10691	-0.708452	0.683404
YER077C	YER077C	856810	5	Putative protein of unknown function; green fluorescent protein (GFP)-fusion protein localizes to the mitochondrion; null mutation results in a decrease in plasma membrane electron transport		-0.120034	0.254579	0.209259	0.823804	1.91152	0.524002	0.670329	1.01206	0.372329	0.282191	-0.22745	0.746684	0.489353	0.823804
YER078C	YER078C	856811	5	Mitochondrial aminopeptidase; cleaves the N termini of at least 38 imported proteins after cleavage by the mitochondrial processing peptidase (MPP), thereby increasing their stability; member of the aminopeptidase P family		-0.001573	0.033249	0.13917	1.26049	0.14771	0.094009	0.0577766	0.313982	-0.477542	0.0860726	0.157203	0.17281	-0.144278	1.26049
YER079W	YER079W	856812	5	Putative protein of unknown function		0.0927453	0.005443	-0.143979	0.990044	0.555584	-0.262602	-0.397402	0.417204	-0.249578	0.404926	0.735428	0.859479	-0.269921	0.990044
YER080W	AIM9	856813	5	Putative protein of unknown function; the authentic, non-tagged protein is detected in highly purified mitochondria in high-throughput studies; null mutant displays elevated frequency of mitochondrial genome loss		-0.11539	0.007018	-0.0576435	0.979144	0.260304	0.170518	0.293695	-0.185195	0.0630789	-0.163196	0.04854	0.245444	0.194593	0.979144
YER081W	SER3	856814	5	3-phosphoglycerate dehydrogenase, catalyzes the first step in serine and glycine biosynthesis; isozyme of Ser33p		0.20429	-0.449112	0.323456	0.568375	0.097305	-0.596084	-0.747702	-0.510092	-0.301484	-0.538937	0.023837	-0.72966	-0.933037	0.568375
YER082C	UTP7	856815	5	Nucleolar protein, component of the small subunit (SSU) processome containing the U3 snoRNA that is involved in processing of pre-18S rRNA		0.0457313	-0.027764	0.0009105	0.896484	-0.0282136	-0.207543	0.0524214	0.106024	-0.0110144	0.012469	-0.113293	-0.047568	-0.0136255	0.896484
YER083C	GET2	856817	5	Subunit of the GET complex; involved in insertion of proteins into the ER membrane; required for the retrieval of HDEL proteins from the Golgi to the ER in an ERD2 dependent fashion and for meiotic nuclear division	GET complex	-0.0436512	-0.183347	-0.0213135	1.04359	0.0347946	-0.093712	0.062843	-0.0865565	0.0856199	-0.045283	0.049544	-0.152388	0.0093945	1.04359
YER086W	ILV1	856819	5	Threonine deaminase, catalyzes the first step in isoleucine biosynthesis; expression is under general amino acid control; ILV1 locus exhibits highly positioned nucleosomes whose organization is independent of known ILV1 regulation		0.252635	-0.058171	0.0053235	1.22809	-0.17472	-0.137889	-0.278876	0.481533	-0.054315	-0.479368	0.174718	-0.426544	-0.299425	1.22809
YER087C-B	SBH1	856821	5	Beta subunit of the Sec61p ER translocation complex (Sec61p-Sss1p-Sbh1p); involved in protein translocation into the endoplasmic reticulum; interacts with the exocyst complex and also with Rtn1p; homologous to Sbh2p	Sec61p translocon complex	-0.0783075	0.010463	-0.169718	0.742064	-0.0492125	0.109323	0.208901	0.0823325	0.147843	-0.166781	-0.295381	-0.227199	0.246479	0.742064
YER087W	AIM10	856820	5	Protein with similarity to tRNA synthetases; non-tagged protein is detected in purified mitochondria; null mutant is viable and displays elevated frequency of mitochondrial genome loss		0.0009472	0.006727	0.142637	1.12811	0.197114	0.32511	0.018433	0.169195	-0.258092	0.350632	0.127787	0.655003	0.0976745	1.12811
YER088C	DOT6	856822	5	Protein involved in rRNA and ribosome biogenesis; binds polymerase A and C motif; subunit of the RPD3L histone deacetylase complex; similar to Tod6p; has chromatin specific SANT domain; involved in telomeric gene silencing and filamentation		-0.043379	-0.600259	-0.509987	0.153935	-0.946381	-0.610432	-0.714719	-0.846813	-1.3459	-0.52985	-1.08049	-0.968098	-0.985053	0.153935
YER089C	PTC2	856823	5	Type 2C protein phosphatase (PP2C); dephosphorylates Hog1p to limit maximal osmostress induced kinase activity; dephosphorylates Ire1p to downregulate the unfolded protein response; dephosphorylates Cdc28p; inactivates the DNA checkpoint		0.0708513	0.173376	-0.0308355	1.16073	-0.190378	0.006612	-0.307178	0.115009	-0.408011	-0.058387	0.313228	-0.116859	-0.0447755	1.16073
YER090W	TRP2	856824	5	Anthranilate synthase, catalyzes the initial step of tryptophan biosynthesis, forms multifunctional hetero-oligomeric anthranilate synthase:indole-3-glycerol phosphate synthase enzyme complex with Trp3p	anthranilate synthase complex	0.313471	-0.071021	0.0295415	1.41004	-0.370134	-0.203149	-0.299665	0.332072	0.0110653	-0.435198	0.600728	-0.378057	-0.284666	1.41004
YER091C	MET6	856825	5	Cobalamin-independent methionine synthase, involved in methionine biosynthesis and regeneration; requires a minimum of two glutamates on the methyltetrahydrofolate substrate, similar to bacterial metE homologs		0.47362	-0.239721	-0.372916	0.58684	-0.659343	-0.347823	-1.18659	0.351709	-0.123926	-0.568078	0.286174	-0.010871	-0.196921	0.58684
YER092W	IES5	856827	5	Protein that associates with the INO80 chromatin remodeling complex under low-salt conditions		-0.0931505	0.04535	-0.15213	0.146121	-0.0436771	-0.098953	-0.159511	-0.312752	0.108469	0.171964	0.116581	-0.064273	-0.0873545	0.146121
YER093C	TSC11	856828	5	Subunit of TORC2 (Tor2p-Lst8p-Avo1-Avo2-Tsc11p-Bit61p), a membrane-associated complex that regulates actin cytoskeletal dynamics during polarized growth and cell wall integrity; involved in sphingolipid metabolism; contains a RasGEFN domain	TORC 2 complex	-0.25224	-0.085116	0.0710365			-0.261262	0.185554	-1.00992	0.124845	0.11664	-0.036891	0.005352
YER093C-A	YER093C-A	856829	5	Protein of unknown function; null mutant is viable but shows increased loss of mitochondrial genome and synthetic interaction with prohibitin (phb1); contains an intron			-0.044967	0.13695	0.954274				0.650915	-0.454861	-0.086331				0.954274
YER094C	PUP3	856830	5	Beta 3 subunit of the 20S proteasome involved in ubiquitin-dependent catabolism; human homolog is subunit C10	20S proteasome	0.208808	-0.118183	0.409304	0.720514	0.159712	0.031612		0.189667	0.0972519	-0.08213	0.662538	0.425294	0.258263	0.720514
YER095W	RAD51	856831	5	Strand exchange protein, forms a helical filament with DNA that searches for homology; involved in the recombinational repair of double-strand breaks in DNA during vegetative growth and meiosis; homolog of Dmc1p and bacterial RecA protein		-0.110578	-0.069219	0.356745	0.899274	0.276302	-0.055256	-0.08399	0.310333	-0.0394135	0.488101	0.033594	0.455289	-0.0896365	0.899274
YER098W	UBP9	856835	5	Ubiquitin carboxyl-terminal hydrolase, ubiquitin-specific protease that cleaves ubiquitin-protein fusions			0.296435		-2.73931	-0.123749	0.237678	0.0643874		-0.0238902	-0.331493	-0.258808	0.46439	0.324973	-2.73931
YER099C	PRS2	856836	5	5-phospho-ribosyl-1(alpha)-pyrophosphate synthetase, synthesizes PRPP, which is required for nucleotide, histidine, and tryptophan biosynthesis; one of five related enzymes, which are active as heteromultimeric complexes		0.0268472	-0.081649	-0.142876	1.13793	-0.168238	0.066526	-0.07522	0.0195685	0.14248	0.153653	-0.018941	0.205475	-0.0646325	1.13793
YER100W	UBC6	856837	5	Ubiquitin-conjugating enzyme involved in ER-associated protein degradation; located at the cytosolic side of the ER membrane; tail region contains a transmembrane segment at the C-terminus; substrate of the ubiquitin-proteasome pathway		-0.065879	0.261484	-0.111419	0.750144	-0.0445016	-0.489464	-0.178188	0.0349075	0.0454818	-0.694709	-0.132169	-0.272376	0.50224	0.750144
YER101C	AST2	856838	5	Protein that may have a role in targeting of plasma membrane [H+]ATPase (Pma1p) to the plasma membrane, as suggested by analysis of genetic interactions		-0.171149	0.056333	-0.0046245	0.646104	-0.187113	0.257094	0.0950744	-0.14942	0.0260297	0.513471	-0.228675	0.38616	-0.372077	0.646104
YER102W	RPS8B	856839	5	Protein component of the small (40S) ribosomal subunit; identical to Rps8Ap and has similarity to rat S8 ribosomal protein	cytoplasmic ribosomal small subunit	0.0093537	-0.07878	0.040645	-0.232224	-0.135518	-0.0853775	0.0563959	0.102704	-0.07274	-0.144988	-0.231574	-0.416532	-0.111861	-0.232224
YER103W	SSA4	856840	5	Heat shock protein that is highly induced upon stress; plays a role in SRP-dependent cotranslational protein-membrane targeting and translocation; member of the HSP70 family; cytoplasmic protein that concentrates in nuclei upon starvation		-0.560887	1.52075	-0.868278	0.309611	1.61348	2.13229	2.20049	-1.95623	0.764039	1.49058	0.137244	-0.78877	-2.58053	0.309611
YER105C	NUP157	856842	5	Abundant subunit of the nuclear pore complex (NPC), present on both sides of the NPC; has similarity to Nup170p; essential role, with Nup170p, in NPC assembly		-0.0343149	-0.000757	0.0046015	0.950554	-0.0806028	0.01114	0.174119	-0.0709575	-0.111388	-0.015298	0.280871	-0.126145	-0.0541725	0.950554
YER107C	GLE2	856844	5	Component of the Nup82 subcomplex of the nuclear pore complex; required for polyadenylated RNA export but not for protein import; homologous to S. pombe Rae1p		0.0256922	0.065895	0.0298965	1.17539	-0.0759898	-0.061466	-0.011437	-0.166222	-0.342365	-0.031274	0.174714	-0.030784	0.134979	1.17539
YER110C	KAP123	856846	5	Karyopherin beta, mediates nuclear import of ribosomal proteins prior to assembly into ribosomes and import of histones H3 and H4; localizes to the nuclear pore, nucleus, and cytoplasm; exhibits genetic interactions with RAI1		0.0197284	-0.197678	-0.0655348	0.747074	0.0955952	-0.039838	0.22308	-0.189464	0.0664289	-0.272165	-0.016849	-0.531657	-0.169331	0.747074
YER111C	SWI4	856847	5	DNA binding component of the SBF complex (Swi4p-Swi6p), a transcriptional activator that in concert with MBF (Mbp1-Swi6p) regulates late G1-specific transcription of targets including cyclins and genes required for DNA synthesis and repair	SBF complex	-0.143947	-0.033725	-0.104069	0.529382	0.107227	0.059241	-0.176711	0.0577735	0.180103	-0.11522	0.076286	0.274722	0.0245305	0.529382
YER112W	LSM4	856848	5	Lsm (Like Sm) protein; part of heteroheptameric complexes (Lsm2p-7p and either Lsm1p or 8p): cytoplasmic Lsm1p complex involved in mRNA decay; nuclear Lsm8p complex part of U6 snRNP and possibly involved in processing tRNA, snoRNA, and rRNA	U6 snRNP complex|U4/U6 x U5 tri-snRNP complex	-0.0444064	-0.191534	-0.0547085	0.291251	0.0197419	0.082669	-0.191576	-0.127836	0.0468799	-0.048506	0.091738	-0.011486	0.110949	0.291251
YER113C	TMN3	856849	5	Protein with a role in cellular adhesion and filamentous growth; similar to Emp70p and Tmn2p; member of Transmembrane Nine family with 9 transmembrane segments; localizes to Golgi; induced by 8-methoxypsoralen plus UVA irradiation		-0.0516947	-0.041004	-0.244126	0.734444	-0.319583	-0.3029	0.006055	0.138695	-0.35257	-0.05505	-0.521216	-0.379349	-0.229307	0.734444
YER114C	BOI2	856850	5	Protein implicated in polar growth, functionally redundant with Boi1p; interacts with bud-emergence protein Bem1p; contains an SH3 (src homology 3) domain and a PH (pleckstrin homology) domain		0.0827583	0.146364	-0.14253	1.00091	-0.18916	-0.046008	0.0744873	0.0171545	-0.11267	-0.012462	0.000125	-0.015839	-0.103456	1.00091
YER117W	RPL23B	856853	5	Protein component of the large (60S) ribosomal subunit, identical to Rpl23Ap and has similarity to E. coli L14 and rat L23 ribosomal proteins	cytoplasmic ribosomal large subunit	0.0300071	-0.060301	0.104972	-0.253057	-0.0563608	-0.0362795	-0.0018215	0.153243	0.0322629	-0.156261	-0.194576	-0.397141	-0.108096	-0.253057
YER120W	SCS2	856856	5	Integral ER membrane protein that regulates phospholipid metabolism via an interaction with the FFAT motif of Opi1p, also involved in telomeric silencing, disruption causes inositol auxotrophy above 34 degrees C, VAP homolog		-0.0177119	0.016511	-0.0471615	1.00072	-0.239545	-1.6e-05	-0.000393	-0.0950805	-0.0285308	0.08534	-0.198344	-0.031189	-0.0257065	1.00072
YER122C	GLO3	856859	5	ADP-ribosylation factor GTPase activating protein (ARF GAP), involved in ER-Golgi transport; shares functional similarity with Gcs1p	COPI	0.0052484	-0.004452	-0.123782	0.805974	-0.158676	-0.119295	-0.033137	-0.153559	0.242233	-0.213814	-0.010346	-0.013352	0.0638615	0.805974
YER123W	YCK3	856860	5	Palmitoylated, vacuolar membrane-localized casein kinase I isoform; negatively regulates vacuole fusion during hypertonic stress via phosphorylation of Vps41p; shares essential functions with Hrr25p; regulates vesicle fusion in AP-3 pathway		-0.213426	0.122422	-0.157219	1.36176	-0.237283	-0.204324	-0.157851	0.148015	-0.157413	0.206849	-0.089269	0.101622	0.0023615	1.36176
YER125W	RSP5	856862	5	E3 ubiquitin ligase of the NEDD4 family; involved in regulating many cellular processes, including MVB sorting, heat shock response, transcription, and endocytosis; human homolog is involved in Liddle syndrome; mutant tolerates aneuploidy	Rsp5p/Bul1 ubiquitin ligase complex|Rsp5p/Bul2 ubiquitin ligase complex	0.0960503	0.047168	-0.0492205	0.943374	-0.119623	0.086841	0.005657	-0.0073045	-0.160509	0.079023	0.079742	0.255543	-0.0066035	0.943374
YER126C	NSA2	856863	5	Protein constituent of 66S pre-ribosomal particles, contributes to processing of the 27S pre-rRNA		0.0490013	-0.017611	-0.162244	0.471973	-0.150375	-0.19049	-0.048231	0.453838	0.17077	0.031955	-0.05706	-0.440771	0.0175185	0.471973
YER127W	LCP5	856864	5	Essential protein involved in maturation of 18S rRNA; depletion leads to inhibited pre-rRNA processing and reduced polysome levels; localizes primarily to the nucleolus		0.0174326	-0.016634	-0.14428	0.073021	-0.007335	-0.060003	0.044938	0.0681235	0.332851	0.024505	0.026674	-0.161543	0.150886	0.073021
YER128W	YER128W	856865	5	Putative protein of unknown function		0.202287	-0.180575	0.10077	1.14939	-0.35242	0.0477	-0.199629	0.210494	-0.0926366	-0.34698	0.050279	0.015491	-0.0307665	1.14939
YER129W	SAK1	856866	5	Upstream serine/threonine kinase for the SNF1 complex; partially redundant with Elm1p and Tos3p; members of this family have functional orthology with LKB1, a mammalian kinase associated with Peutz-Jeghers cancer-susceptibility syndrome		0.0415613	0.031262	-0.072154	1.27043	0.18641	-0.024388	-0.10493	0.0320735	-0.107721	0.421282	-0.423218	-0.137427	0.156169	1.27043
YER131W	RPS26B	856868	5	Protein component of the small (40S) ribosomal subunit; nearly identical to Rps26Ap and has similarity to rat S26 ribosomal protein	cytoplasmic ribosomal small subunit	0.612978	-0.002985	-0.613893	-0.27173	-0.178109	-0.0094485	-0.0803185	0.20834	-0.0413028	-0.056701	-0.319372	-0.436802	-0.0729955	-0.27173
YER132C	PMD1	856869	5	Protein with an N-terminal kelch-like domain, putative negative regulator of early meiotic gene expression; required, with Mds3p, for growth under alkaline conditions		0.0107163	-0.271467	0.154824	0.989284	0.255275	-0.02662	0.27929	-0.191817	-0.137988	-0.1431			0.128743	0.989284
YER133W	GLC7	856870	5	Type 1 serine/threonine protein phosphatase catalytic subunit, involved in many processes (eg: glycogen metabolism, sporulation, mitosis); accumulates at mating projections by interaction with Afr1p; interacts with many regulatory subunits	Gip1p/Glc7p complex|mRNA cleavage and polyadenylation specificity factor complex|Reg2p/Glc7p complex|Bni4p/Glc7p complex|Reg1p/Glc7p complex|Bud14p/Glc7p complex|Sds22p/Glc7p complex|Gac1p/Glc7p complex	-0.0417377	0.046251	-0.121369	0.765554	0.209478	0.011078	0.004447	-0.0760255	0.227591	0.058338	0.003811	0.043519	0.125048	0.765554
YER134C	YER134C	856873	5	Putative protein of unknown function; non-essential gene		-0.0617864	-0.020961	0.0500985	1.19555	-0.0888898	0.062753	-0.247791	0.0757895	-0.157686	0.128896	-0.106666	0.207089	0.202711	1.19555
YER136W	GDI1	856876	5	GDP dissociation inhibitor, regulates vesicle traffic in secretory pathways by regulating the dissociation of GDP from the Sec4/Ypt/rab family of GTP binding proteins		-0.0643743	-0.15673	-0.0882465	0.941964	0.0920789	-0.021241	0.036898	-0.173428	0.336237	-0.124573	0.197022	-0.040101	-0.0653065	0.941964
YER137C	YER137C	856877	5	Putative protein of unknown function		-0.0884878	0.555176	0.0344215	1.04289	0.313701	0.510224	0.374873	0.657096	0.641319	0.184742	-0.151657	0.041879	-0.13973	1.04289
YER139C	RTR1	856882	5	CTD phosphatase; dephosphorylates S5-P in the C-terminal domain of Rpo21p; has a cysteine-rich motif required for function and conserved in eukaryotes; shuttles between the nucleus and cytoplasm		0.121008	-0.121557	0.0997165	0.896704	-0.105171	0.024334	0.0953724	0.245864	0.120657	0.031928	0.087678	0.446836	0.286731	0.896704
YER141W	COX15	856884	5	Protein required for the hydroxylation of heme O to form heme A, which is an essential prosthetic group for cytochrome c oxidase		-0.0384424	0.417343	-0.0127965	1.16219	-0.449439	0.363746	-0.042415	1.50197	-0.638555	0.219811	-0.023846	0.104236	0.0029235	1.16219
YER142C	MAG1	856885	5	3-methyl-adenine DNA glycosylase involved in protecting DNA against alkylating agents; initiates base excision repair by removing damaged bases to create abasic sites that are subsequently repaired		-0.190468	-0.128963	2.76296	0.618762	1.09096	0.258715	0.313202	0.481328	0.702713	-1.75371	0.572106	0.751001	0.189802	0.618762
YER143W	DDI1	856886	5	DNA damage-inducible v-SNARE binding protein, contains a ubiquitin-associated (UBA) domain, may act as a negative regulator of constitutive exocytosis, may play a role in S-phase checkpoint control		-0.0070035	-0.06142	0.218788	1.06083	0.226548	0.207384	0.154274	0.0041625	0.124018	0.246138	0.497872	0.311603	0.0318175	1.06083
YER144C	UBP5	856887	5	Putative ubiquitin-specific protease, closest paralog of Doa4p but has no functional overlap; concentrates at the bud neck		-0.0157621	0.151639	0.0552895	0.838624	0.500426	0.275365	0.509479		0.385844			0.174203	0.157027	0.838624
YER145C	FTR1	856888	5	High affinity iron permease involved in the transport of iron across the plasma membrane; forms complex with Fet3p; expression is regulated by iron	Permease-Oxidase Complex	-0.318866	0.407327	-0.538685	0.093409		0.354263	0.49446	-0.562769	0.13899	0.341095	0.869398	-0.945318	0.501289	0.093409
YER146W	LSM5	856889	5	Lsm (Like Sm) protein; part of heteroheptameric complexes (Lsm2p-7p and either Lsm1p or 8p): cytoplasmic Lsm1p complex involved in mRNA decay; nuclear Lsm8p complex part of U6 snRNP and possibly involved in processing tRNA, snoRNA, and rRNA	U6 snRNP complex|U4/U6 x U5 tri-snRNP complex	-0.0133231	0.023824	0.108117	0.307062	0.166763	0.080112	-0.164222	0.199074	-0.0975786	-0.805585	0.245363	0.146882	0.209847	0.307062
YER148W	SPT15	856891	5	TATA-binding protein, general transcription factor that interacts with other factors to form the preinitiation complex at promoters, essential for viability	transcription factor TFIIIB complex|transcription factor TFIID complex|Mot1p complex	0.154218	-0.083961	-0.0544995	0.791674	-0.221859	-0.299391	-0.258446	-0.105021	-0.100853	-0.257741	-0.189797	-0.228178	0.11426	0.791674
YER149C	PEA2	856892	5	Coiled-coil polarisome protein required for polarized morphogenesis, cell fusion, and low affinity Ca2+ influx; forms polarisome complex with Bni1p, Bud6p, and Spa2p; localizes to sites of polarized growth	polarisome complex	0.118051	-0.100351	0.0294375	0.687704	-0.104218	-0.11671	-0.07524	0.192368	0.0099093	-0.010511	-0.085559	-0.097123	-0.0177495	0.687704
YER151C	UBP3	856895	5	Ubiquitin-specific protease that interacts with Bre5p to co-regulate anterograde and retrograde transport between the ER and Golgi; inhibitor of gene silencing; cleaves ubiquitin fusions but not polyubiquitin; also has mRNA binding activity	Ubp3p/Bre5p complex	0.0687033	-0.072307	0.0529205	0.268933	0.0080131	-0.00642	-0.005298	0.175049	0.290377	-0.082114	0.610049	-0.100931	0.178517	0.268933
YER152C	YER152C	856896	5	Protein with 2-aminoadipate transaminase activity; shares amino acid similarity with the aminotransferases Aro8p and Aro9p; YER152C is not an essential gene		-0.186959	0.364202		1.65093	-0.144349	0.036681		-0.275116			-0.130489	0.191461	0.0418755	1.65093
YER154W	OXA1	856898	5	Mitochondrial inner membrane insertase, mediates the insertion of both mitochondrial- and nuclear-encoded proteins from the matrix into the inner membrane, interacts with mitochondrial ribosomes; conserved from bacteria to animals		-0.0642028	0.122872	0.219125	1.07284	-0.115204	0.24676	-0.117683		-0.482184	0.072257	0.05457	0.296027	0.111046	1.07284
YER155C	BEM2	856899	5	Rho GTPase activating protein (RhoGAP) involved in the control of cytoskeleton organization and cellular morphogenesis; required for bud emergence		-0.0244182	-0.035954	-0.0980706	1.11515	-0.0409808	-0.132093	0.128458	-0.0535555	0.159719	-0.153142	-0.13068	0.154918	-0.0230135	1.11515
YER156C	YER156C	856900	5	Putative protein of unknown function; interacts with Hsp82p and copurifies with Ipl1p; expression is copper responsive and downregulated in strains deleted for MAC1, a copper-responsive transcription factor; similarity to mammalian MYG1		0.113886	0.120118	0.242677	1.24288	-0.204486	-0.013971	-0.252188	0.409216	-0.603478	0.026536	-0.401094	-0.355535	0.139529	1.24288
YER157W	COG3	856901	5	Essential component of the conserved oligomeric Golgi complex (Cog1p through Cog8p), a cytosolic tethering complex that functions in protein trafficking to mediate fusion of transport vesicles to Golgi compartments	Golgi transport complex	-0.0041316	0.02233	-0.115532	0.553092	0.0082804	-0.124314	-0.119939	-0.349438	0.0946359	-0.146978	-0.06623	-0.118741	0.36848	0.553092
YER159C	BUR6	856904	5	Subunit of a heterodimeric NC2 transcription regulator complex with Ncb2p; complex binds to TBP and can repress transcription by preventing preinitiation complex assembly or stimulate activated transcription; homologous to human NC2alpha	NC2 complex	-0.0522087	-0.03841	-0.0293395	0.571471	-0.392474	-0.148921	-0.362858	-0.344547	-0.352373	-0.348966	0.013855	-0.036708	-0.149825	0.571471
YER161C	SPT2	856908	5	Protein involved in negative regulation of transcription; required for RNA polyadenylation; exhibits regulated interactions with both histones and SWI-SNF components, has similarity to mammalian HMG1 proteins		-0.0446567	-0.025325	-0.0568745	1.05366	0.0090738	-0.424855	-0.222405		0.479751	-0.106197	-0.125618	-0.360214	-0.0945215	1.05366
YER162C	RAD4	856909	5	Protein that recognizes and binds damaged DNA (with Rad23p) during nucleotide excision repair; subunit of Nuclear Excision Repair Factor 2 (NEF2); homolog of human XPC protein	nucleotide-excision repair factor 2 complex	-0.109363		0.376436	1.6238		-0.110277	0.182296		-0.380018		0.269369	0.200073	0.219492	1.6238
YER163C	YER163C	856910	5	Putative protein of unknown function; green fluorescent protein (GFP)-fusion protein localizes to the cytoplasm and nucleus; periodically expressed during the metabolic cycle; weak similarity to bacterial cation transport protein		0.0600873	-0.01593	0.0305515	0.908364	0.244958	0.17722	0.126671	-0.0226715	0.494778	0.262665	-0.01738	0.534836	0.0477845	0.908364
YER164W	CHD1	856911	5	Nucleosome remodeling factor that functions in regulation of transcription elongation; contains a chromo domain, a helicase domain and a DNA-binding domain; component of both the SAGA and SLIK complexes	SAGA complex|SLIK (SAGA-like) complex	-0.0321228	-0.193298	-0.0211275	0.677394	-0.168435	-0.166737	0.177245	-0.23073	-0.18035	0.031291	0.200929	-0.252804	-0.0393605	0.677394
YER165W	PAB1	856912	5	Poly(A) binding protein, part of the 3'-end RNA-processing complex, mediates interactions between the 5' cap structure and the 3' mRNA poly(A) tail, involved in control of poly(A) tail length, interacts with translation factor eIF-4G		0.0234411	-0.135813	0.0752695	0.183033	-0.178995	-0.034445	-0.018225	0.154635	-0.132302	-0.088503	-0.181057	-0.100327	-0.0114545	0.183033
[truncated: 2,971 more rows]

## Sheet: TMT
TMT PROTEOME
[truncated: 3,977 more rows]
