# Supplementary material for: Quantitative proteomic analysis reveals posttranslational responses to aneuploidy in yeast
Source: eLife journal article supplement (doi:10.7554/elife.03023), 2014-07-29
Supplement: supp [file elife-03023-supp-v1.zip › elife_poa_e03023_Figure_2_source_data_1.xlsx]

## Sheet: SILAC (RNA)
Synthetic Media RNA Data
YORF	NAME	WT/WT	Dis I/WT	Dis II/WT	Dis V/WT	Dis VIII/WT	Dis IX/WT	Dis X/WT	Dis XI/WT	Dis XII/WT	Dis XIII/WT	Dis XIV/WT	Dis XV/WT	Dis XVI/WT
YAL001C	TFC3	0.03	0.94	0.2	0.45	0.13	0.26	0.25	-0.26	-0.24	0.2	0.03	-0.33	-0.16
YAL002W	VPS8	-0.19	0.88	0.04	-0.31	0.19	-0.09	-0.33	-0.19	0.03	-0.15	-0.17	-0.14	0.14
YAL003W	EFB1	0.1	0.73	-0.01	-0.44	0.15	0.06	-0.05	-0.03	-0.13	0.05	0.13	-0.34	0.02
YAL004W	YAL004W	-0.19	0.68	0.29	-0.87	1.16	-0.1	0.58	-0.04	0.36	0.04	-0.34	-0.13	-0.41
YAL005C	SSA1	-0.14	1.93	1.59	-0.5	2.04	0.15	1.29	0.17	0.07	0.38	-0.14	1.03	0
YAL007C	ERP2	-0.08	0.65	-0.21	-0.49	0.05	0.03	-0.26	0.17	-0.23	-0.39	-0.17	-0.48	0.01
YAL008W	FUN14	-0.06	1.04	0.12	0.23	0.5	-0.01	-0.06	-0.02	0.39	0.65	-0.36	0.9	0.12
YAL009W	SPO7	-0.08	0.81	-0.2	0.04	-0.13	-0.23	-0.22	-0.13	-0.05	0.22	-0.24	-0.14	-0.16
YAL010C	MDM10	0.14	1.04	0.1	0.23	0.13	0.01	0.08	0.26	0.15	-0.43	0.17	-0.01	-0.06
YAL011W	SWC3	0.08	0.8	-0.16	-0.4	-0.45	-0.09	-0.21	-0.57	-0.61	-0.28	-0.06	-0.72	-0.34
YAL012W	CYS3	-0.17	1	-0.21	0.45	0.49	-0.03	0.06	-0.12	0.15	0.49	0.54	0.13	0.58
YAL013W	DEP1	0.03	1.14	-0.16	-0.28	0.25	-0.07	0.05	-0.46	-0.21	0.31	0.3	-0.11	0.04
YAL014C	SYN8	-0.19	0.78	-0.24	-0.29	-0.05	-0.07	-0.11	0.07	-0.14	-0.13	-0.04	-0.13	0.45
YAL015C	NTG1	-0.01	0.81	0.32	0.47	0.19	0.1	0.29	0.17	0.46	-0.09	0.14	-0.06	-0.25
YAL016W	TPD3	-0.04	1.1	0.2	-0.01	-0.02	-0.05	0	0.03	0.13	-0.05	0.21	0.12	0.03
YAL017W	PSK1	-0.02	0.98	0.15	-0.07	0.17	0.08	0.08	0.14	0.14	0.54	0.39	0.36	0.35
YAL019W	FUN30	-0.1	0.99	0.06	-0.45	-0.22	-0.23	-0.08	-0.29	-0.13	-0.06	0.05	-0.55	-0.69
YAL020C	ATS1	0.03	1.09	-0.39	0.46	0.23	0.06	-0.06	0.09	0.12	0.5	0.12	0.48	-0.68
YAL021C	CCR4	0.11	1.11	-0.11	-0.46	-0.16	-0.23	-0.12	0.04	-0.17	-0.73	0.03	0.09	-0.51
YAL022C	FUN26	-0.02	0.96	-0.31	0.54	0.08	-0.09	0.15	0.04	0.03	0.27	0.5	0.22	0.07
YAL023C	PMT2	-0.24	1	-0.31	-0.73	0.34	-0.31	-0.19	-0.04	0.04	-0.47	0.11	-0.52	0.09
YAL024C	LTE1	0.01	0.94	0.11	-0.14	0.07	0.05	-0.25	-0.03	-0.05	-0.43	0.03	-0.29	0.21
YAL025C	MAK16	0.17	1	0.37	-0.03	-0.53	0.11	0.35	-0.21	-0.02	0.38	0.13	-0.09	-0.32
YAL026C	DRS2	0.18	1.14	-0.01	0.45	0.49	-0.07	0.14	0.01	0.03	0.03	0.34	-0.23	-0.13
YAL027W	YAL027W	0.08	0.59	-0.03	-0.08	-0.28	0.01	0.1	-0.11	-0.04	0.03	-0.11	-0.33	-0.03
YAL028W	FRT2	-0.17	0.91	-0.13	-0.12	0.17	-0.19	-0.27	-0.18	0.31	0.37	-0.27	0.28	0.25
YAL029C	MYO4	-0.06	0.81	0.02	-0.42	0.03	-0.19	-0.08	-0.26	0.07	-0.54	0.17	-0.32	-0.24
YAL030W	SNC1	0.09	0.9	0.15	0.08	0.11	-0.03	0.19	0.21	-0.2	0.36	-0.19	0.52	0.48
YAL031C	YAL031C	-0.01	0.88	-0.19	-0.19	-0.17	-0.01	-0.11	-0.17	-0.37	-0.13	-0.35	-0.09	0.29
YAL032C	PRP45	0.01	0.93	-0.22	-0.19	-0.21	0.07	-0.07	-0.1	-0.51	0.15	-0.02	-0.25	-0.07
YAL033W	POP5	0.09	0.57	-0.09	0.19	-0.5	-0.02	-0.06	0.26	-0.26	0.05	-0.37	0.01	0.06
YAL034C	FUN19	-0.01	1.25	0.05	0.08	-0.04	-0.25	-0.03	-0.04	0.28	-0.04	-0.08	0.15	0.02
YAL034C-B	YAL034C-B										0.1
YAL034W-A	MTW1	0.03	0.83	-0.31	0.2	-0.41	-0.04	-0.06	-0.11	-0.42	-0.26	-0.34	-0.17	-0.17
YAL035W	FUN12	-0.13	1.04	-0.05	-0.54	-0.35	-0.2	-0.13	-0.28	-0.07	-0.1	0.15	-0.38	-0.43
YAL036C	RBG1	0.18	1.05	0.06	-0.53	-0.32	0.06	0.13	0.23	0.33	0.39	0.07	0.08	-0.59
YAL037W	YAL037W	-0.01	0.65	-0.57	0.12	-0.19	-0.26	-0.31	-0.42	0.34	-0.77	0.21	-0.83	1.1
YAL038W	CDC19	-0.08	1.14	0.41	0.47	0.29	-0.12	0.12	-0.06	0.53	-0.62	-0.2	-0.08	0.57
YAL039C	CYC3	0.06	1.01	-0.06	-0.12	0.16	0.17	-0.36	0.63	0.09	0.21	-0.28	0.6	0.09
YAL040C	CLN3	-0.11	0.63	-0.29	-0.41	-0.06	-0.33	-0.09	-0.35	0.23	-0.15	-0.02	0.23	0.24
YAL041W	CDC24	0.03	1.13	0.1	-0.14	0.11	-0.1	0.02	-0.04	-0.19	-0.23	0.01	-0.18	-0.11
YAL042C-A	YAL042C-A										0	0.17		-0.8
YAL042W	ERV46	0.04	1.06	-0.11	0.03	0.19	0.05	0.26	0.05	-0.31	0.24	0.27	0.24	-0.05
YAL043C	PTA1	-0.12	0.88	-0.42	-0.57	-0.17	-0.27	-0.38	-0.27	-0.37	-0.15	0.18	-0.31	-0.22
YAL044C	GCV3	0.36	0.95	0.03	1.05	0.23	0.28	0.24	0.55	0.07	0.63	0.6	0.69	-0.18
YAL044W-A	YAL044W-A	-0.02	0.88	-0.13	0.17	-0.11	0.01	-0.25	0.11	0.01	-0.3	-0.41	-0.1	0.58
YAL045C	YAL045C										-0.4	-0.65		0.38
YAL046C	YAL046C	0.06	0.9	0.11	0.13	-0.14	0.23	0.07	0.4	-0.33	0.53	-0.03	0.11	0.39
YAL047C	SPC72	-0.1	0.92	-0.02	0.04	-0.35	-0.07	-0.07	-0.33	-0.18	-0.21	0.08	-0.44	-0.3
YAL048C	GEM1	0.19	1.09	-0.02	-0.3	0.04	-0.33	-0.25	-0.12	0.12	-0.58	0.22	-0.13	-0.74
YAL049C	YAL049C	0.1	1.35	0.19	-0.09	0.1	0.13	0.22	0.23	0.06	0.14	-0.11	0.43	0.26
YAL051W	OAF1	-0.08	1.28	-0.14	-0.12	0	-0.07	-0.05	-0.18	-0.17	0	-0.12	-0.06	-0.03
YAL053W	YAL053W	-0.19	1.07	0.04	0.34	0.11	-0.07	0.08	0.04	0.66	-0.69	-0.31	0.52	0.39
YAL054C	ACS1	0.04	1.07	-0.19	0.46	0.37	0.24	-0.05	0.44	0.26	0.31	-0.16	0.71	0.59
YAL055W	PEX22	0.15	1.16	0.4	0.1	0.29	0.37	0.35	0.07	-0.07	0.53	0.05	0.17	0.12
YAL056C-A	YAL056C-A				-0.08						-0.19	-0.08		0.57
YAL056W	GPB2	0.22	1.1	0	0.25	-0.07	0.09	-0.09	0.16	-0.12	0.16	-0.21	-0.07	-0.15
YAL058W	CNE1	-0.02	0.93	-0.26	-0.36	-0.14	-0.15	-0.3	-0.18	-0.17	0.1	0.2	-0.21	-0.26
YAL059W	ECM1	0.25	0.91	-0.07	-0.55	-0.9	0.1	-0.08	0.23	-0.37	0.13	0.1	-0.17	-0.07
YAL060W	BDH1	0	0.94	-0.36	0.74	0.18	0.05	-0.23	-0.02	0.02	0.55	0.12	0.41	-0.69
YAL061W	YAL061W	-0.11	1.37	-0.17	1.09	-0.43	0.26	-0.37	-0.63	-0.02	1.97	-0.27	-0.12	0.55
YAL062W	GDH3	-0.16	0.81	-0.69	-0.34	0.15	-0.07	-1.04	-0.51	0.43	-0.17	0.25	0.22	0.44
YAL063C	FLO9		0.13	0.02	0.24	0.38		0.5		0.77	-0.47	-0.13	0.45	-0.43
YAL064C-A	YAL064C-A										-0.72	0.61		0.13
YAL064W	YAL064W										-0.46	0.01		0.13
YAL064W-B	YAL064W-B										0.19	-0.6		-0.16
YAL065C	YAL065C										-2.04
YAL067C	SEO1	-0.11	0.98	-0.58	0.48	0.75	0.05	-0.63	-0.19	0.5	0.16	0.45	-0.11	-0.56
YAL068C	YAL068C	-0.08	-0.1	-0.39	0.42	0.42	-0.21	-0.02	-0.27	0.93	-0.65	0.03	0.22	-0.07
YAL069W	YAL069W										-0.06	0.4		0.33
YAR002C-A	ERP1	-0.03	0.77	-0.21	0.08	0.15	-0.05	0.05	0.13	0.16	-0.87	-0.3	-0.12	0.08
YAR002W	NUP60	-0.11	0.83	-0.28	-0.42	-0.29	-0.16	-0.03	-0.46	-0.06	-0.38	0.11	-0.34	-0.18
YAR003W	SWD1	-0.08	0.76	-0.16	-0.32	0.2	0.05	-0.07	0.07	0.15	-0.22	-0.03	-0.07	-0.2
YAR007C	RFA1	0.1	0.99	0.3	-0.16	-0.13	0.15	-0.01	-0.12	-0.15	-0.21	-0.17	-0.12	-0.41
YAR008W	SEN34	0.08	0.68	-0.14	-0.27	-0.54	0.16	-0.27	-0.25	-0.41	0.23	-0.12	-0.34	-0.43
YAR014C	BUD14	0.1	0.89	-0.05	0.11	-0.27	-0.07	-0.05	-0.23	-0.11	0.03	0.28	-0.13	-0.57
YAR018C	KIN3	-0.11	1	0.17	-0.28	0.01	0.01	0.2	-0.01	0	-0.77	0.42	-0.3	0.14
YAR019C	CDC15	-0.08	1.19	-0.07	-0.11	0.12	-0.09	0.05	-0.08	0.12	-0.33	0	0.14	-0.33
YAR020C	PAU7	-0.09	0.36	-0.25	0.26	0.71	0.1	-0.06	0.04	1.16	-0.33	0.07	0.47	0.29
YAR023C	YAR023C	0.11	0.66	-0.05	-0.21	-0.15	-0.19	-0.44	-0.2	0	-0.21	-0.14	0.01	-0.05
YAR027W	UIP3	-0.17	0.81	-0.08	0.41	0.17	0.04	0.16	-0.02	0.23	0.33	0.23	0.05	0.39
YAR028W	YAR028W	-0.14	0.72	-0.28	0.09	-0.55	-0.16	-0.23	-0.18	0.19	-0.44	0.36	-0.18	0.87
YAR029W	YAR029W	0.14	0.71	0.05	-0.09	-0.42	0.03	0.28	-0.36	0.28	-0.81	0.28	-0.41	1.05
YAR030C	YAR030C		0.56	-0.47	0.97	0.34		0.42	0.31	0.21	0.27	0.35	0.42	0.48
YAR031W	PRM9									1.33	-1.53	0.34		0.91
YAR033W	MST28	0.12	0.93	-0.03	0.04	-0.17	-0.14	-0.04	-0.14	-0.1	-0.02	0.09	-0.17	0.34
YAR035W	YAT1	0.15	0.54	-0.61	0.55	0.12	0.42	-0.06	0.74	0.12	0.69	0.87	0.2	1.59
YAR042W	SWH1										-0.54	-0.21		-0.89
YAR044W	YAR044W	0	1.15	-0.07	-0.24	0.36	-0.08	0.04	0.01	0.23	-0.54	-0.2	-0.32	-0.26
YAR047C	YAR047C
YAR050W	FLO1	-0.12	0.44	-0.4	0.47	0.04	0.03	-0.13	-0.08	0.6	-0.09	0.42	0.28	1.01
YAR053W	YAR053W	0.57	0.36	-0.35	-0.28	0.55	0.04	0.05	0.43	0.23	0.43	-1.15	-0.04	-0.26
YAR060C	YAR060C	-0.11	1.22	0.34	0.01	0.67	0.28	-0.04	-0.23	1.27	-0.27	0.92	0.41	0.56
YAR061W	YAR061W										-0.44	-0.15		-0.28
YAR062W	YAR062W		0.04	-0.13		0.49		0.75	0.29	1.61	-0.48	0.32	0.28	-0.45
YAR064W	YAR064W										-0.28	0.06		0.01
YAR066W	YAR066W										-0.58	0.41		-1.93
YAR068W	YAR068W	-0.13	-0.23	-0.54	1.03	0.92	0.57	0.4	0.68	-0.17	-0.17	0.7	1.02	-0.44
YAR069C	YAR069C					0.09				0.38	-0.17	-1.43		-0.66
YAR070C	YAR070C										-0.47			0.33
YAR071W	PHO11	-0.21	-0.05	0.3	-0.53	-0.13	-1.12	-2.35	-1.24	0.65	-3.58	-2.83	-2.07	-2.4
YAR073W	IMD1	-0.15	0.03	-0.54	-0.44	-0.36	-0.34	0.04	-0.06	0.46	-1.05	1.39	-0.32	-0.23
YAR075W	YAR075W	-0.24	0.38	-0.99	-0.41	-0.67	-0.39	0.16	-0.26	0.08	-1.6	1.14	-0.48	-0.69
YBL001C	ECM15	0.1	-0.42	1.07	0.46	-0.06	0.13	-0.21	0.25	0.14	-0.14	-0.44	0.28	0.55
YBL002W	HTB2	-0.12	0.03	0.57	-0.21	-0.3	0.07	-0.37	-0.21	-1.09	0.2	-0.48	0.04	0.3
YBL003C	HTA2	-0.1	-0.06	0.19	0.1	-0.69	0.06	-0.32	-0.33	-0.91	0.8	-0.92	-0.28	0.06
YBL004W	UTP20	0.17	-0.06	0.89	-0.68	-0.21	-0.22	-0.19	-0.1	-0.17	0.05	0.38	-0.29	-0.05
YBL005W	PDR3	0.09	0.16	1.13	-0.18	-0.13	-0.08	-0.22	-0.16	0.42	-0.56	-0.02	-0.09	0.01
YBL006C	LDB7	0.13	-0.3	0.98	0.23	-0.19	0.09	-0.31	0.02	-0.34	0.35	-0.47	-0.42	0.06
YBL007C	SLA1	-0.14	0.07	1.11	-0.41	0.2	-0.11	-0.42	-0.35	-0.35	0.1	0.18	-0.47	0.1
YBL008W	HIR1	0.03	0.09	0.96	-0.44	-0.18	0.07	-0.04	0.12	-0.05	-0.05	0.18	-0.28	-0.34
YBL009W	YBL009W	-0.11	0.12	0.61	-0.67	-0.16	-0.13	-0.2	-0.12	-0.43	-0.32	-0.15	-0.59	-0.11
YBL010C	YBL010C	0.12	-0.14	0.81	-0.27	-0.29	-0.02	0.12	0.01	-0.22	0.26	-0.05	-0.04	-0.41
YBL011W	SCT1	-0.02	0.3	0.81	-0.68	0.06	-0.05	-0.07	-0.01	-0.27	-0.49	0.36	-0.14	-0.42
YBL012C	YBL012C										0.28	-0.08		-0.33
YBL013W	FMT1										-0.18	-0.59		-0.3
YBL014C	RRN6	0.15	0.17	0.89	-0.32	-0.25	-0.03	0.07	0.07	0.05	-0.13	0.2	-0.1	-0.33
YBL015W	ACH1	-0.27	0.13	0.77	-0.23	0.22	0.16	-0.21	0.19	-0.15	0.66	0.04	0.39	0.24
YBL016W	FUS3	-0.01	0	0.41	-0.41	-0.19	-0.26	-0.09	-0.09	-0.04	-0.15	0.08	0.2	-0.08
YBL017C	PEP1	-0.05	0.24	0.97	-0.45	0.08	-0.17	-0.06	-0.21	-0.28	-0.14	0.26	-0.34	-0.15
YBL018C	POP8	0.3	-0.19	0.67	0.24	-0.48	-0.03	0.03	0.32	-0.29	-0.09	-1.03	-0.6	-0.3
YBL019W	APN2	-0.22	-0.15	0.94	-0.23	-0.32	-0.01	0.02	-0.1	-0.06	-0.11	-0.24	-0.14	-0.53
YBL020W	RFT1	-0.22	0.2	0.63	0.23	-0.15	-0.35	0	-0.04	-0.29	0.08	-0.12	0.04	-0.21
YBL021C	HAP3	0.25	0.22	0.88	0.48	-0.08	0.24	0.23	0.34	-0.32	1.09	0.06	0.34	-0.01
YBL022C	PIM1	-0.04	0.21	1.61	-0.38	0.3	0.08	0.3	0.15	-0.12	0.69	0.3	0.08	-0.21
YBL023C	MCM2	-0.1	0.25	0.94	-0.41	-0.15	-0.09	-0.22	-0.15	-0.09	0	-0.02	-0.2	-0.52
YBL024W	NCL1	0.31	0.2	1.17	-0.24	-0.55	0.04	0	0.1	-0.14	-0.26	0.16	-0.24	-0.2
YBL025W	RRN10	-0.1	0.11	0.96	-0.1	-0.11	0.25	0.08	-0.05	-0.23	0.05	0.22	-0.09	0
YBL026W	LSM2	0.03	-0.14	0.94	0.01	-0.34	0.07	0.1	0.09	0.06	-0.77	-0.61	-0.09	0.08
YBL027W	RPL19B	-0.19	-0.43	0.71	-0.58	-0.5	-0.2	-0.16	-0.18	-0.48	-1	-0.09	-0.45	-0.45
YBL028C	YBL028C	0.41	0.04	0.76	-0.07	-0.66	0	0.14	0.12	-0.02	0.15	0.34	0.11	-0.1
YBL029C-A	YBL029C-A	-0.18	-0.43	0.89	0.19	0.07	0.11	-0.11	0.26	0.1	-0.44	-0.52	-0.14	0.12
YBL029W	YBL029W	-0.2	0.2	0.54	-1.19	-0.77	-0.66	-0.32	-0.49	0.17	-1.61	-1.3	-0.39	-0.04
YBL030C	PET9	0.02	0.33	1.18	0.2	0.17	0.08	0.26	0.49	-0.62	0.47	0.48	1.05	0.42
YBL031W	SHE1	0.14	-0.04	1.1	-0.14	-0.06	0.1	0.15	-0.15	0.19	-0.31	-0.07	-0.25	0.19
YBL032W	HEK2	-0.19	0.01	0.73	-0.94	-0.02	-0.3	-0.13	-0.37	-0.69	0.01	-0.03	-0.48	-0.24
YBL033C	RIB1	0.06	0.12	1.03	0.57	0.28	0.21	-0.01	0.29	0.21	-0.04	-0.06	-0.11	-0.29
YBL034C	STU1	-0.07	-0.1	0.82	-0.44	0.04	-0.15	-0.22	-0.46	-0.28	-0.22	-0.09	-0.33	-0.02
YBL035C	POL12	0.03	0.07	0.98	-0.58	-0.31	-0.01	-0.39	-0.03	-0.36	-0.34	-0.01	-0.32	0.06
YBL036C	YBL036C	0	-0.24	1.03	0.13	-0.11	-0.07	0.15	-0.18	-0.09	-0.34	0.22	-0.25	-0.2
YBL037W	APL3	0.05	0.16	1.25	-0.04	0.1	0.16	0.2	0.09	0.24	0.44	0.2	0.11	0.49
YBL038W	MRPL16	0.19	-0.01	1.22	0.4	0.01	0.34	0.09	0.26	-0.6	0.64	-0.01	0.28	-0.17
YBL039C	URA7	0.12	-0.11	0.85	-0.82	-0.62	-0.12	-0.01	0.01	-0.2	-0.12	0.21	-0.27	-0.51
YBL040C	ERD2	-0.03	-0.16	0.9	0.28	0.18	0.03	0.2	0.06	0.05	0.23	-0.07	0.16	0.22
YBL041W	PRE7	-0.02	-0.07	1.27	-0.18	0.39	0.05	0.36	0.01	0.51	-0.12	0.12	0.1	0.14
YBL042C	FUI1	-0.03	0.12	1.06	0.3	-0.04	-0.28	-0.13	-0.29	0.97	-1.01	0.41	-0.22	-0.35
YBL043W	ECM13			3.36				0.65		0.51	-0.33	-0.32	0.92	0.32
YBL044W	YBL044W										-0.49	0.15		0.78
YBL045C	COR1	0.1	0.34	1.28	-0.16	0.03	0.18	0.1	0.54	-0.95	0.34	0.22	0.7	0.02
YBL046W	YBL046W	0.02	0.03	1.07	0.04	-0.1	0.09	0.16	-0.32	0.18	0.61	0.22	-0.28	0.1
YBL047C	EDE1	-0.13	0.01	1.16	-0.31	0.12	-0.08	-0.24	-0.54	-0.37	0	0.41	-0.34	0.53
YBL048W	YBL048W	0	-0.04	0.63	2.2	-0.24	0.48	-1.03	0.11	-0.76	0.66	0.22	0.89	0.48
YBL049W	MOH1		-0.01	0.61		-0.5					0.8	0.11	0.87	0.45
YBL050W	SEC17	-0.09	-0.32	0.96	0.27	-0.12	-0.11	-0.07	-0.1	0.04	0.11	-0.27	-0.39	-0.28
YBL051C	PIN4	-0.09	0.01	0.6	-0.27	-0.04	-0.3	0	-0.19	0.15	-0.16	0.19	-0.46	-0.1
YBL052C	SAS3	0.05	0.13	1.2	-0.43	-0.19	0.07	0.32	-0.36	-0.33	0.04	-0.22	-0.47	-0.44
YBL053W	YBL053W										-0.36	-0.39		-0.59
YBL054W	YBL054W	0.21	0.14	1.07	-0.45	-0.41	-0.04	0.35	0.09	0.12	0.39	0.4	0.09	0.24
YBL055C	YBL055C	0.2	-0.03	0.99	0.12	-0.28	-0.01	-0.03	-0.08	0.07	-0.08	0.06	-0.05	0.23
YBL056W	PTC3	0.04	0.03	0.92	-0.06	-0.13	0.15	-0.06	-0.13	-0.22	-0.23	-0.02	-0.07	0.05
YBL057C	PTH2	0.18	-0.23	0.94	-0.02	-0.16	0.21	0.07	0.08	-0.24	0.12	0.01	-0.41	0.4
YBL058W	SHP1	-0.1	-0.12	1.38	-0.31	0.21	0.06	0.34	-0.22	-0.37	0.36	0.32	-0.21	-0.21
YBL059C-A	YBL059C-A	0.17	0.01	1.51	0.09	0	0.22	0.3	0.47	-0.49	0.35	-0.26	0.53	0.02
YBL059W	YBL059W	0.19	-0.06	1.35	0.29	0.06	0.23	0.35	0.35	-0.01	0.58	-0.07	0.64	0.25
YBL060W	YBL060W	0.1	-0.03	1.14	-0.08	0.01	0.2	0.23	-0.01	0.25	-0.22	-0.31	-0.15	-0.42
YBL061C	SKT5	-0.1	-0.07	0.99	0.01	-0.09	0	0.07	-0.14	0.78	-0.63	-0.41	-0.14	-0.62
YBL062W	YBL062W										-0.9	-0.59		-0.83
YBL063W	KIP1	-0.08	-0.03	1.21	-0.11	0.06	-0.19	0.1	-0.33	-0.29	-0.08	-0.32	-0.32	-0.37
YBL064C	PRX1	0.06	-0.03	1.98	0.4	0.95	0.44	0.07	0.28	0.24	0.94	-0.1	0.61	0.93
YBL065W	YBL065W										0.75	0.81		0.1
YBL066C	SEF1	0.3	0.34	1.05	-0.01	-0.29	-0.3	-0.01	-0.07	-0.42	0.36	0.17	0.35	-0.01
YBL067C	UBP13	0.16	-0.08	0.92	-0.27	-0.14	0.02	-0.18	-0.07	-0.31	1.13	0.15	-0.24	-0.17
YBL068W	PRS4	0.05	0.06	0.96	-0.21	-0.44	-0.12	-0.23	-0.2	0.19	-0.31	-0.39	-0.08	-0.32
YBL069W	AST1	-0.11	0.24	0.96	-0.88	-0.43	-0.21	-0.47	-0.4	-0.13	-0.13	-0.37	-0.08	-0.68
YBL070C	YBL070C										-0.32	-0.74		-1.07
YBL071C	YBL071C										0.03	-0.34		0.21
YBL071W-A	KTI11	0.06	-0.08	0.7	-0.35	0.06	-0.01	0.02	-0.09	-0.06	-0.52	-0.15	0.05	0.01
YBL072C	RPS8A	0	-0.24	0.94	-0.36	-0.25	-0.07	-0.02	-0.19	-0.42	-0.31	-0.03	-0.18	-0.11
YBL073W	YBL073W										0.74	-0.56		0.48
YBL074C	AAR2										-0.65	-0.22		-1.07
YBL075C	SSA3	0.07	0.31	0.86	0.13	0.01	0.24	0.27	-0.03	0.06	-0.05	0.17	-0.14	-0.08
YBL076C	ILS1	-0.15	-0.02	0.84	-0.11	-0.06	-0.17	-0.18	-0.14	0.45	-0.41	0.23	-0.44	-0.11
YBL077W	YBL077W	0.03	0.15	0.8	-0.27	0.03	0.24	0.16	0.03	0.47	-0.82	-0.02	-0.23	-0.21
YBL078C	ATG8	-0.12	-0.11	1.35	1.13	0.34	0.5	-0.17	0.06	0.82	0.13	-0.19	0.93	0.87
YBL079W	NUP170	-0.14	-0.11	0.86	-0.6	-0.14	-0.24	-0.3	-0.08	-0.22	-0.31	0.02	-0.38	-0.39
YBL080C	PET112	0.08	-0.1	0.98	-0.12	0.21	0.02	0.1	0.09	-0.72	0.44	-0.41	-0.02	-0.97
YBL081W	YBL081W	-0.19	0.07	0.48	-0.38	-0.28	-0.29	-0.1	-0.13	0.36	0.48	0.46	-0.13	0.04
YBL082C	ALG3	-0.16	0.06	0.47	-0.06	0.13	-0.22	-0.04	-0.03	0.17	0.26	0.2	-0.28	0
YBL083C	YBL083C	-0.17	-0.06	0.63	0.09	0.06	-0.13	-0.09	-0.07	0.18	-0.02	0.35	-0.28	0.03
YBL084C	CDC27	-0.1	0.04	1.07	-0.1	-0.02	-0.14	-0.11	-0.1	-0.28	-0.46	-0.14	-0.34	-0.17
YBL085W	BOI1	-0.05	-0.02	0.87	-0.52	-0.09	-0.11	-0.05	-0.3	-0.2	-0.21	0.02	-0.5	-0.64
YBL086C	YBL086C	-0.1	-0.17	0.73	0.16	-0.16	-0.03	0	-0.28	-0.13	0.32	-0.51	-0.42	0.01
YBL087C	RPL23A	0.16	0.04	0.7	0	-0.05	0.09	-0.05	0.17	-0.2	-1.02	-0.09	-0.16	-0.44
YBL088C	TEL1	-0.02	0.29	1.16	-0.14	0.22	-0.12	0.13	0.08	0.01	-0.31	0.04	-0.14	0.16
YBL089W	AVT5	-0.13	0.06	0.72	0.53	-0.01	-0.2	0.06	-0.12	0	0.24	-0.14	0.12	0.06
YBL090W	MRP21	0.1	0.04	1.34	0.04	-0.14	0.28	0.1	0.3	-0.59	0.87	-0.01	0.33	-0.19
YBL091C	MAP2	0.07	0.04	1.09	-0.11	-0.12	0.01	0.14	-0.15	-0.32	0.05	0.19	-0.05	-0.2
YBL091C-A	SCS22	0.36	0.42	0.82	0.45	0.02	0.5	0.17	0.11	-0.01	-0.04	-0.24	-0.11	0.39
YBL092W	RPL32	0.15	-0.19	1.09	-0.21	-0.09	0.07	0	0.11	0.03	0.16	0.02	-0.19	0.15
YBL093C	ROX3	0.1	-0.14	0.74	0.03	-0.28	-0.02	-0.02	0	0.05	-0.32	0.07	-0.33	-0.18
YBL094C	YBL094C			0.65							-0.04	-0.07		-0.56
YBL095W	YBL095W	-0.14	0.3	0.85	-0.21	0	-0.07	0.11	0.06	-0.06	0.06	-0.4	0.17	-0.44
YBL096C	YBL096C		0.65	0.66		0.17		0.06		-0.32	-0.77	0.1	-0.41	-0.82
YBL097W	BRN1										-1.75	-0.63		-1.21
YBL098W	BNA4	0.21	0.03	0.35	-0.32	0.03	-0.09	0.51	0.4	1.12	-0.54	0.03	-0.14	0.16
YBL099W	ATP1	-0.19	0.24	0.76	-0.17	-0.01	-0.49	-0.19	0.08	-1.17	0.44	0.07	0.54	0.22
YBL100C	YBL100C		0.04	0.48	-0.08	-0.05		0.22			-0.11	-0.02	0.02	-0.27
YBL101C	ECM21	-0.18	0.29	1.14	0.13	0.36	0.18	0.07	0.1	0.39	-0.24	0.01	0.23	0.11
YBL102W	SFT2	-0.02	0.03	0.97	1.01	0.16	-0.1	0.14	0.05	0.16	0.24	0.24	0.09	0.16
YBL103C	RTG3	0	0.04	0.71	0.38	-0.26	-0.28	-0.05	-0.06	0.08	0.07	0.35	-0.54	-0.21
YBL104C	YBL104C	0.09	0.05	0.95	-0.04	-0.19	-0.12	-0.04	-0.04	-0.27	-0.49	0.13	-0.32	-0.18
YBL105C	PKC1	0.18	0.43	1.04	-0.14	-0.29	-0.02	0.15	0	-0.19	-0.6	0.06	-0.26	-0.24
YBL106C	SRO77	0.3	0.18	0.6	-0.4	-0.32	-0.18	-0.08	0.41	-0.4	-0.73	-0.29	0.22	-0.15
YBL107C	YBL107C	0.05	-0.05	1.63	0.05	0.27	0.32	0.31	0.44	-0.03	0.08	0.07	-0.07	0.03
YBL107W-A	YBL107W-A	0.01	-0.5	-0.66	0.41	0.78	-0.72	-0.15	0.08	1.23	-0.91	0.3	-0.42	-0.53
YBL108C-A	YBL108C-A	0.06	0.15	-0.34	0.54	0.51	-0.14	0.06	-0.02	0.85	-1.68	0.22	0.29	0.27
YBL108W	YBL108W											0.62
YBL109W	YBL109W		-0.23	-0.34	-0.44	0.91	-0.53	-0.06		0.27	-0.05	0.09	-0.11	0.08
YBL111C	YBL111C	0.29	0.17	-0.05	-0.52	0.44	-0.29	-0.17	-0.41	0.16	-0.16	-0.21	-0.07	-0.19
YBL112C	YBL112C	0.3	0.25	0.03	-0.39	0.51	-0.21	-0.14	-0.38	0.27	-0.06	-0.14	0.05	0.11
YBL113C	YBL113C	-0.03	0.12	0.16	-0.38	0.49	-0.08	-0.03	-0.54	0.25	-0.04	0.09	-0.08	0.44
YBR001C	NTH2	0.13	0.19	1.33	0.5	0.56	0.38	0.01	0.36	0	0.28	0.38	0.4	-0.21
YBR002C	RER2	0.16	-0.09	0.92	-0.47	-0.03	0.04	0.01	0.23	0.12	0.09	-0.25	-0.38	-0.49
YBR003W	COQ1	0.04	-0.03	0.83	-0.45	0.27	-0.09	-0.19	0.2	-0.46	0.35	-0.29	0.3	-0.27
YBR004C	GPI18	-0.18	0.08	0.74	0.19	-0.06	-0.17	0	-0.18	0.34	-0.45	0.02	0.25	0.12
YBR005W	RCR1	-0.05	0.12	0.83	0.74	0.15	0.1	-0.27	0.18	0.64	-0.52	0.28	0.51	0.55
YBR006W	UGA2	0.09	-0.02	1.15	0.18	-0.07	0.04	-0.67	-0.21	0.85	0.39	-1.04	0.53	0.57
YBR007C	YBR007C	-0.08	0.04	0.69	-0.04	-0.29	-0.5	-0.35	-0.56	-0.05	-0.54	-0.46	-0.51	0.02
YBR008C	FLR1	-0.34	0.17	0.91	-0.21	-0.07	-0.24	-0.45	-0.32	0.29	-0.35	-0.41	-0.46	-0.12
YBR009C	HHF1	-0.07	-0.24	0.08	0.12	-0.54	0.06	-0.2	-0.33	-0.82	0.28	0.06	-0.22	0.47
YBR010W	HHT1	0.09	-0.21	0.63	0.1	-0.62	0.28	-0.2	-0.21	-0.78	0.53	-0.57	-0.24	0.47
YBR011C	IPP1	-0.07	-0.03	0.93	-0.57	-0.18	-0.02	-0.12	-0.11	-0.11	0.11	-0.06	0.04	0.09
YBR012C	YBR012C
YBR013C	YBR013C
YBR014C	YBR014C	-0.09	-0.35	0.75	0.09	0.23	0.09	0.23	0.02	0.2	-0.64	-0.02	-0.14	0.18
YBR015C	MNN2	0.1	0.11	0.98	-0.25	-0.07	0.08	-0.17	0.12	0	0.09	-0.04	0.07	-0.1
YBR016W	YBR016W	0.07	-0.03	0.69	0.53	0.15	0.18	-0.06	0.17	-0.58	0.21	0.61	-0.04	-0.06
YBR017C	KAP104	-0.05	0.19	0.85	-0.38	-0.25	-0.02	-0.05	-0.13	0.21	-0.4	0.43	-0.17	-0.44
YBR018C	GAL7										0.25	0.38		0.48
YBR019C	GAL10				0.3						0.06
YBR020W	GAL1	-0.41	-0.3	0.84	-0.1	-0.11	-0.11	-0.29	-0.43	0.33	-0.57	0.34	-0.31	-0.07
YBR021W	FUR4	-0.15	0.15	0.68	0.34	-0.07	-0.28	0.04	-0.16	0.54	-0.71	-0.24	0.07	-0.07
YBR022W	POA1	0.14	-0.14	1.11	0.13	0	0.01	-0.17	0.15	-0.35	-0.23	-0.62	0.14	-0.29
YBR023C	CHS3	-0.06	0.1	0.99	0.08	0.04	-0.11	0.14	-0.08	0.9	-0.32	0.1	0.51	-0.07
YBR024W	SCO2	0.16	-0.15	1.43	-0.31	0	0.31	0.09	0.16	-0.22	0.63	-0.1	0.6	0.31
YBR025C	YBR025C	-0.01	0.07	0.96	-0.65	-0.05	0.01	0.11	-0.13	-0.15	-0.55	-0.24	0.09	-0.1
YBR026C	ETR1	0.18	0	1.25	-0.15	0.39	0.18	0.27	-0.12	0.15	0.28	0.01	0.49	-0.16
YBR027C	YBR027C										2.15			-1.35
YBR028C	YBR028C	0.08	-0.06	0.73	-0.1	-0.34	-0.09	-0.09	-0.18	-0.17	-0.21	-0.19	-0.63	-0.54
YBR029C	CDS1	-0.08	-0.08	0.87	-0.21	-0.37	-0.14	-0.32	0.01	-0.07	-0.28	-0.25	0.05	0.11
YBR030W	YBR030W	0.01	-0.1	0.86	-0.32	-0.34	0.01	0.13	-0.22	0.27	-0.4	0.13	-0.47	0.24
YBR031W	RPL4A	0.01	0.05	0.08	0.32	0.03	0.07	0.04	0	-0.07	-0.7	0.15	0.19	0.15
YBR032W	YBR032W										-0.21	-1.72		-0.9
YBR033W	YBR033W	0.1	0.04	0.63	1	-0.13	0.05	-1.17	0.01	0.1	0.08	0.18	0.38	0.5
YBR034C	HMT1	0.23	0.11	1.08	-0.7	-0.76	-0.05	-0.09	0.02	-0.02	-0.14	0.11	0.1	-0.06
YBR035C	PDX3	0.03	-0.16	1.16	0.79	-0.09	0.09	0.01	-0.11	0.48	0.25	0.07	-0.09	0.11
YBR036C	CSG2	-0.01	0.12	0.99	0.9	0.13	0.02	0.07	-0.04	0.02	0.87	0.3	0.36	0.36
YBR037C	SCO1	0	0.17	1.24	-0.29	0.27	0.16	-0.01	0.51	-0.96	0.76	0.21	0.34	-0.2
YBR038W	CHS2	-0.24	-0.06	0.92	-0.02	-0.09	-0.18	0.1	-0.16	-0.07	-0.19	0.3	0	0.13
YBR039W	ATP3	-0.08	-0.23	0.83	-0.08	-0.08	-0.14	-0.17	0.14	-1.03	-0.04	-0.1	0.23	-0.09
YBR040W	FIG1										0.28	-0.31
YBR041W	FAT1	-0.02	0.03	0.84	-0.01	0.25	0.07	0.07	-0.05	0.45	0.04	0.56	0.07	0.41
YBR042C	YBR042C	0.04	-0.04	0.8	-0.18	-0.23	0.07	-0.05	-0.31	-0.31	0.23	0.05	-0.2	-0.08
YBR043C	QDR3	-0.05	0.22	0.85	0.27	0.03	0.15	-0.04	0.4	0.35	-0.48	0.5	-0.38	-0.15
YBR044C	TCM62	0.09	0.06	0.92	-0.18	0.23	0.11	-0.06	0.14	-0.39	-0.05	-0.11	0.15	-0.39
YBR045C	GIP1	0.07	0.18	0.96	-0.38	0.3	0.38	0.01	-0.38	0.66	-0.52	-0.34	-0.36	-0.51
YBR046C	ZTA1	-0.19	0.13	1.06	1.35	0.47	-0.18	0.04	0.18	0.96	-0.12	-0.34	0.79	-0.65
YBR047W	YBR047W										-0.87	-0.45		-0.77
YBR048W	RPS11B	-0.11	-0.24	0.59	-0.68	-0.11	-0.18	-0.17	-0.16	-0.44	0.58	-0.01	-0.17	-0.12
YBR049C	REB1	-0.02	0.01	0.37	-0.25	-0.17	-0.12	-0.03	-0.31	-0.46	-0.27	-0.19	-0.32	-0.08
YBR050C	REG2			0.55		-0.04		-0.53		0.11	0.13	-0.87		0.04
YBR051W	YBR051W				-0.93
YBR052C	YBR052C	0.2	0.31	1.69	0.03	0.47	0.43	0.24	0.11	-0.38	0.73	0.03	0.65	0.17
YBR053C	YBR053C	-0.23	0.19	1.51	0.3	0.53	0.17	0.23	-0.2	0.34	0.05	-0.18	0.85	0.67
YBR054W	YRO2	-0.2	0.24	1.1	-2.42	0.82	-0.39	0.59	-2.17	-1.47	1.23	-0.83	-0.29	2.96
YBR055C	PRP6	0.09	-0.03	0.99	-0.03	-0.25	0.04	0.06	-0.17	-0.16	-0.49	0.06	-0.28	-0.24
YBR056W	YBR056W	-0.09	0.06	1.44	0.37	0.56	-0.03	0.24	-0.02	0.35	0.66	0.26	0.56	0.27
YBR057C	MUM2	0.24	0.15	0.98	0.02	-0.27	0.22	0.04	-0.08	-0.1	-0.07	0.22	-0.19	0.16
YBR058C	UBP14	0.04	-0.1	0.97	-0.2	-0.23	-0.12	-0.04	-0.1	-0.22	-0.12	0.2	-0.23	-0.09
YBR058C-A	TSC3	-0.03	-0.37	0.85	0.43	-0.35	-0.06	-0.24	0	-0.48	0.06	-0.33	-0.07	-0.03
YBR059C	AKL1	-0.07	0.08	1.33	-0.24	0.43	0.1	0	-0.2	0.13	0.06	0.29	-0.23	0.48
YBR060C	ORC2	-0.03	0.06	0.9	-0.33	-0.2	0	-0.06	-0.18	-0.16	-0.31	0.23	-0.32	-0.23
YBR061C	TRM7	0.06	0	0.91	-0.38	-0.49	-0.42	-0.23	-0.06	-0.49	0.04	-0.34	-0.28	-0.35
YBR062C	YBR062C	0.03	0.09	1.62	0.55	0.32	0.29	0.43	0.24	0.41	0.76	0.16	0.38	-0.03
YBR063C	YBR063C	0.07	0.02	1.18	0.23	0.02	-0.01	0.36	-0.07	0.36	-0.72	-0.07	-0.21	-0.3
YBR064W	YBR064W										-0.66	-0.2		-0.69
YBR065C	ECM2	-0.04	0.74	1.12	-0.3	0.09	-0.1	0.05	0.12	0.05	-0.49	-0.01	-0.26	-0.67
YBR066C	NRG2	0.42	-0.26	0.22	0.03	0.41	0.36	-0.41	0.23	-0.53	0.19	-0.79	0.31	-0.38
YBR067C	TIP1	-0.07	-0.32	0.46	-0.17	0.04	-0.34	-0.21	-0.57	-0.76	-0.61	0.02	2	-0.05
YBR068C	BAP2	-0.14	-0.09	0.45	1.49	-0.16	-0.3	0.08	0.15	0	-0.11	0.32	0.21	-0.4
YBR069C	TAT1	-0.19	0.01	0.64	-0.72	-0.29	-0.41	0.19	-0.4	-1.24	0.48	0.56	-0.14	-0.43
YBR070C	ALG14	-0.18	-0.07	0.45	-0.07	-0.11	-0.14	-0.19	-0.17	0.14	0.17	-0.66	-0.03	0.23
YBR071W	YBR071W	-0.07	0.22	0.93	0.69	0.05	0.24	0.07	0.08	0.64	0.13	-0.06	0.08	0.51
YBR072W	HSP26	0.18	1.08	1.95	2.23	0.15	2.3	-0.71	0.21	-0.6	1.45	0.3	1.04	1.02
YBR073W	RDH54	0.08	0.14	1.42	-0.01	0.04	0.16	0.31	0.06	0.58	-0.15	0.08	-0.03	-0.22
YBR074W	YBR074W	-0.07	0.43	0.64	-0.65	0.27	-0.34	0.39	-0.54	-0.37	-0.74	-0.21	-0.22	-1.5
YBR075W	YBR075W	-0.21	0.1	0.63	-0.49	-0.15	-0.35	0.05	-0.27	-0.3	-0.38	0.01	-0.25	-0.63
YBR076W	ECM8										0.62	0.14		2.49
YBR077C	SLM4	-0.08	-0.04	0.91	0.15	0.11	0.05	-0.05	0.07	0.12	-0.69	-0.19	-0.07	-0.28
YBR078W	ECM33	-0.28	0.06	0.99	0.51	0.09	0.01	-0.24	-0.29	0.07	0.12	0.06	-0.04	0.21
YBR079C	RPG1	-0.14	-0.14	0.34	-0.71	-0.28	-0.18	-0.21	-0.29	-0.21	-0.36	-0.12	-0.62	-0.48
YBR080C	SEC18	-0.03	-0.12	0.9	-0.03	0.06	-0.08	0.03	-0.05	0.06	-0.13	0.15	-0.17	-0.45
YBR081C	SPT7	-0.1	0	0.99	0.63	-0.27	-0.17	0	-0.25	-0.04	-0.1	0.19	-0.38	-0.14
YBR082C	UBC4	-0.14	-0.44	0.92	-0.26	0.21	-0.15	0.05	-0.24	-0.04	-0.63	-0.2	-0.35	0.44
YBR083W	TEC1	0.1	0.21	-0.01	-0.44	-0.79	-0.47	0.28	-0.47	-0.05	-0.15	-0.01	1.06	-0.16
YBR084C-A	RPL19A	-0.09	-0.49	0.75	-0.58	-0.4	-0.1	-0.16	-0.19	-0.37	0	0.07	-0.43	0.02
YBR084W	MIS1	-0.04	-0.15	0.61	-0.49	-0.36	0	-0.34	0.01	-0.27	0.07	0.15	-0.23	-0.21
YBR085C-A	YBR085C-A	0	-0.07	1.04	0.57	0.54	0.25	-0.11	0.15	-0.09	1.2	-0.27	0.57	0.48
YBR085W	AAC3	-0.17	-0.23	0.09	-1.88	-0.1	-0.54	-0.11	0.13	0.75	-1.44	-0.11	-0.22	-0.75
YBR086C	IST2	-0.32	-0.07	0.57	-0.87	-0.09	-0.46	-0.13	-0.57	-0.57	-0.01	0.09	-0.41	0.45
YBR087W	RFC5	0.01	-0.26	0.94	-0.19	-0.26	-0.02	-0.02	-0.05	-0.1	-0.24	-0.25	-0.13	-0.28
YBR088C	POL30	0.06	-0.17	0.99	-0.54	-0.53	0.13	-0.2	-0.01	-0.06	-0.88	-0.16	-0.26	-0.03
YBR089C-A	NHP6B	-0.05	-0.18	0.84	-0.08	0	0.13	-0.41	-0.03	0.11	0.41	0.16	0.18	-0.23
YBR089W	YBR089W										-0.05	-0.48		-0.13
YBR090C	YBR090C		-0.04	0.76	-0.2	0.01	-0.01	-0.28	-0.06	-0.24	0.6	0	0.17	-0.54
YBR091C	MRS5	0.09	-0.32	1.11	-0.14	-0.06	-0.08	-0.06	0.58	-0.24	0.4	-0.37	0	0.04
YBR092C	PHO3	-0.09	0.05	0.78	-2.15	0.21	-0.4	0.67	-0.21	-0.38	0.52	0.85	0.52	0.06
YBR093C	PHO5	-0.21	-0.23	0.86	-0.99	-0.59	-1.29	-3.37	-1.96	0.54	-3.22	-3.2	-2.45	-1.86
YBR094W	YBR094W	0.1	-0.05	0.94	-0.54	-0.08	0.03	0.11	-0.12	0.08	-0.02	-0.04	0.08	-0.44
YBR095C	YBR095C	0.06	-0.2	0.92	0.28	-0.18	0.11	0.12	-0.15	0.07	0.16	0.12	-0.28	-0.13
YBR096W	YBR096W	-0.24	-0.25	0.81	0.71	0.01	0	0.07	-0.19	-0.03	-1.01	-0.1	0.07	0.13
YBR097W	VPS15	-0.03	0.04	0.89	-0.28	-0.14	-0.1	-0.21	-0.02	-0.05	-0.47	-0.06	0.15	-0.2
YBR098W	MMS4					0.12	-0.06	-0.02			-0.01	-0.04		-0.35
YBR099C	YBR099C	-0.37	-0.11	0.41	-0.57	0.17	-0.13	-0.03	-0.16	-1.16	-0.42	-0.08	-0.51	-0.2
YBR100W	YBR100W	0.06	-0.28	1.11	-0.08	-0.16	-0.01	-0.02	-0.13	-0.25	-0.14	-0.16	-0.28	-0.15
YBR101C	FES1	-0.12	-0.17	1.08	0.26	0.26	0.2	-0.09	0.05	-0.12	0.03	-0.11	0.06	-0.22
YBR102C	EXO84	-0.03	0.06	1.03	0.08	-0.07	-0.02	-0.03	-0.43	-0.08	0	0.08	-0.06	-0.15
YBR103C-A	YBR103C-A													-1.5
YBR103W	SIF2	0.05	0.12	1.05	0.11	-0.18	0.04	0.13	-0.15	0.06	-0.09	-0.11	-0.07	-0.29
YBR104W	YMC2	0.12	-0.09	0.92	0.49	-0.25	-0.08	-0.05	0.02	0.57	-0.41	-0.16	-0.68	-0.6
YBR105C	VID24	-0.09	0.12	0.56	0.7	-0.16	0.19	-0.6	-0.1	0.49	-0.44	-0.02	0.96	0
YBR106W	PHO88	-0.03	-0.22	0.82	-0.48	-0.18	-0.1	-0.14	0.11	-0.04	-0.23	-0.23	-0.49	0.01
YBR107C	IML3	0.1	-0.02	1.06	-0.65	-0.21	0.14	0.05	-0.25	-0.23	-0.01	-0.22	-0.13	0.29
YBR108W	YBR108W		-0.07	0.92	-0.33	0.55		-0.17		-0.32	-0.32	-0.01	-0.01	0.49
YBR109C	CMD1	-0.06	-0.22	1	0.35	0	0.01	-0.07	-0.01	0.2	-0.49	-0.32	0.11	0.42
YBR110W	ALG1	-0.13	-0.05	0.62	-0.05	-0.05	-0.19	-0.18	-0.42	-0.09	-0.09	0	0.05	-0.18
YBR111C	YSA1	-0.12	-0.35	1.02	0.32	-0.08	0.02	-0.11	-0.13	0.17	-0.12	-0.32	0.01	0.19
YBR112C	CYC8	0.04	0.09	0.91	-0.32	0.16	0.01	-0.05	-0.29	-0.25	0.56	0.13	-0.44	0.6
YBR113W	YBR113W	0.19	0.26	0.44	-0.21	-0.03	0.06	-0.28	-0.09	-0.12	0.77	-0.52	0.05	1.24
YBR114W	RAD16	0.14	0.24	1.26	-0.14	0.28	0.24	0.23	0.02	0.63	0.26	-0.2	0.32	0.66
YBR116C	YBR116C	-0.09	0.21	0.91	0.73	0.21	0.21	-0.42	-0.7	0.31	0.7	0.4	0.27	1.13
YBR117C	TKL2		0.27	0.98		-0.08		-0.47		0.17	0.85	0.35	-0.05	0.97
YBR118W	TEF2	-0.57	0.15	0.21	-0.08	-0.09	-0.63	-0.29	-0.65	-0.11	-1.3	-0.09	-0.05	0.05
YBR119W	MUD1	-0.09	-0.15	0.9	0.3	-0.33	0.02	0.09	-0.4	0.06	0.13	0.11	-0.15	0.14
YBR120C	CBP6	0.11	0.22	1.44	-0.1	-0.52	0.22	-0.04	-0.1	-0.71	0.59	-0.52	0.13	-0.21
YBR121C	GRS1	0.07	0	1.07	-0.43	-0.18	-0.03	-0.13	-0.03	-0.16	-0.33	0.06	-0.23	-0.04
YBR122C	MRPL36	0.2	-0.3	0.92	-0.06	-0.21	-0.04	-0.16	0.16	-0.69	0.68	-0.16	0.24	-0.18
YBR123C	TFC1	0.1	0.13	1.1	-0.23	-0.2	0.08	0.02	-0.22	-0.29	0.17	0.27	-0.43	-0.21
YBR124W	YBR124W				-0.21						-0.74	-1.32		0.18
YBR125C	PTC4	-0.01	0.08	1.02	-0.23	0.3	-0.06	0.04	0.11	0.19	-0.02	0.08	0.29	-0.06
YBR126C	TPS1	-0.06	0.07	1.16	0.01	0.54	0.23	-0.04	-0.04	-0.15	0.94	0.01	0.59	-0.23
YBR127C	VMA2	-0.05	0.12	1.04	-0.3	-0.32	-0.12	0.1	-0.4	-0.02	-0.36	0.15	-0.01	0.25
YBR128C	ATG14										-0.03	-0.65		0.52
YBR129C	OPY1	-0.07	-0.36	0.73	-0.03	-0.42	-0.07	-0.35	-0.21	-0.96	-0.16	-0.07	-0.65	-0.66
YBR130C	SHE3	0.21	0.16	0.98	0.03	0.09	0.21	0.35	-0.18	-0.04	-0.13	0.17	-0.24	-0.23
YBR131W	CCZ1	0.05	0.07	1.02	-0.09	0	-0.02	0.08	-0.08	-0.21	-0.08	0.11	-0.31	0.11
YBR132C	AGP2	-0.39	0.14	0.9	1.1	0.76	0.68	-0.01	-0.09	-0.34	-0.84	-0.18	0.98	-0.52
YBR133C	HSL7	-0.19	0.02	0.74	-0.66	-0.01	-0.17	-0.28	-0.28	-0.23	-0.21	0.14	0.15	-0.36
YBR134W	YBR134W				0.38						0.15			0.63
YBR135W	CKS1	0.09	-0.26	0.66	-0.69	0.29	-0.27	-0.1	0.27	-0.2	-0.31	-0.35	-0.09	-0.27
YBR136W	MEC1	0.15	0.3	1.17	-0.14	0.07	0.23	0.21	0.19	-0.09	0.01	0.09	0.27	-0.08
YBR137W	YBR137W	-0.01	-0.14	1.1	0.43	0.19	0.15	-0.08	0.27	0.33	-0.25	-0.39	-0.15	0.16
YBR138C	YBR138C	0.02	0.18	1.03	0.12	-0.04	0.18	0.3	0.02	0.04	-0.56	0.37	-0.26	0.1
YBR139W	YBR139W	-0.22	0.21	1.25	0.6	0.51	-0.02	0.25	-0.14	-0.03	0.15	-0.15	0.49	0.17
YBR140C	IRA1	-0.12	0.28	1.09	0.08	-0.15	-0.16	-0.14	-0.04	-0.08	0.15	0.14	0.22	0.37
YBR141C	YBR141C	0.35	0.42	1.23	-0.09	-0.32	0.12	0.39	0.18	0.01	0.23	0.26	0.24	-0.09
YBR142W	MAK5	0.14	0.22	1.18	-0.39	-0.73	0.13	0.17	-0.03	-0.09	0.18	0.49	-0.28	-0.41
YBR143C	SUP45	0.05	-0.13	0.91	-0.37	-0.5	-0.01	-0.19	0.04	-0.23	-0.14	-0.02	-0.26	-0.23
YBR144C	YBR144C										-1.15	-0.53
YBR145W	ADH5	-0.04	0.12	0.03	1.6	-1.06	-0.43	-0.66	-0.1	0.39	-0.59	0.09	-0.88	-0.81
YBR146W	MRPS9	0.17	0.18	1.24	-0.15	0.01	0.22	-0.05	0.54	-0.69	0.64	-0.04	0.39	-0.35
YBR147W	YBR147W	-0.13	1.1	0.66	3.98	0.53	0.65	0.11	1.15	1.69	0.07	-0.38	0.7	-0.02
YBR148W	YSW1	-0.21		0.51	0.31	-0.27		-0.48	-0.24	0.8	-0.35	0.19	-0.5	-0.12
YBR149W	ARA1	-0.02	0.3	1.47	0.49	0.35	0.11	0.12	0	0.1	-0.25	0.44	1.18	0.17
YBR150C	TBS1	0.01	0.19	0.72	0.03	0.05	-0.12	0	-0.08	0.14	-0.23	-0.15	-0.11	-0.17
YBR151W	APD1	0.01	0.12	1.11	-0.16	-0.09	0.1	-0.03	0.06	0.01	0.07	-0.14	0.12	-0.04
YBR152W	SPP381				0.06						-0.35	0.22		-0.76
YBR153W	RIB7	0.02	0.19	0.92	0.04	-0.27	-0.07	0.04	0.09	-0.13	-0.02	0.1	0.15	-0.11
YBR154C	RPB5	0.12	0.07	1.21	-0.1	-0.43	0.21	0.04	0.01	0.24	-0.13	-0.08	-0.24	-0.32
YBR155W	CNS1	0.12	0.21	1.3	-0.12	-0.16	0.03	0.35	-0.14	-0.08	-0.02	0.18	-0.43	-0.51
YBR156C	SLI15	-0.04	0.1	0.84	0.03	-0.32	-0.28	-0.06	-0.19	0.1	-0.22	0.06	-0.06	0.22
YBR157C	ICS2	0.07	0.31	0.37	-0.3	-0.14	0.23	-0.31	0.12	-0.33	0.39	-0.93	-0.12	-0.57
YBR158W	AMN1	0.16	0.23	0.77	-0.71	-0.19	0.11	-0.08	-0.13	-0.59	0.2	-0.2	0.09	-0.43
YBR159W	YBR159W	-0.07	-0.03	0.92	-0.24	0	-0.13	0.01	0.06	-0.06	0.35	-0.13	-0.22	0.11
YBR160W	CDC28	-0.07	-0.32	0.78	-0.26	-0.03	-0.1	-0.2	0.05	0.49	-0.61	-0.39	-0.19	0.2
YBR161W	CSH1	0.05	-0.1	0.6	-0.75	0.4	-0.15	-0.04	-0.01	0.27	-0.02	-0.23	-0.31	0.11
YBR162C	TOS1	-0.16	0.08	0.68	0.22	-0.25	0.08	-0.25	-0.15	-0.09	-0.01	0.49	-0.06	0.27
YBR162W-A	YSY6	0.33	-0.22	1.1	0.58	0.34	0.25	0.18	0.38	0.22	0.23	-0.17	-0.16	0.68
YBR163W	DEM1	-0.08	-0.27	0.83	-0.45	-0.49	-0.2	-0.33	-0.2	-0.6	0.11	-0.45	-0.33	-0.28
YBR164C	ARL1	-0.07	-0.48	0.77	0.07	-0.36	-0.08	-0.11	-0.21	-0.21	-0.48	0.07	-0.35	0.19
YBR165W	UBS1	0.33	-0.12	0.84	0.21	-0.1	0.22	0.06	0.13	0.1	0.42	-0.08	0	0.28
YBR166C	TYR1	0	-0.33	0.82	0.45	-0.12	-0.16	0	0.15	0.45	-0.67	0.14	-0.21	-0.27
YBR167C	POP7	0.07	-0.29	0.88	0.19	-0.26	0.13	0.01	0.21	0.13	-0.04	-0.01	-0.13	-0.1
YBR168W	PEX32	-0.16	-0.26	0.85	-0.54	-0.13	-0.29	-0.09	-0.12	-0.04	0.33	-0.27	-0.11	-0.35
YBR169C	SSE2	-0.1	0.22	1.13	-0.01	0.92	0.21	-0.42	-0.13	0.03	1.38	-0.19	0.41	0.46
YBR170C	NPL4	-0.12	0.02	1.32	-0.33	0.16	0.05	0.08	-0.02	-0.07	-0.17	-0.08	-0.05	-0.48
YBR171W	SEC66	-0.15	-0.6	0.44	-0.17	-0.2	-0.2	-0.33	-0.17	-0.23	-0.41	-0.29	-0.71	-0.33
YBR172C	SMY2	-0.13	0.1	1.09	-0.52	-0.06	-0.29	-0.1	-0.38	0.15	-0.71	-0.15	-0.4	-0.47
YBR173C	UMP1	0.15	-0.09	1.23	0.55	0.39	0.13	0.37	0.34	0.44	0.28	0.3	0.14	0.45
YBR174C	YBR174C										0.7	-0.21		-0.52
YBR175W	SWD3	0.01	0.02	0.95	0.32	0	0.04	0.24	0.02	-0.13	0.09	-0.19	0.1	-0.39
YBR176W	ECM31	0.04	-0.23	0.8	-0.2	0.1	0.01	0.07	0.08	0.11	0.18	-0.1	-0.16	-0.21
YBR177C	EHT1	-0.09	-0.06	0.67	0.37	-0.59	0.12	-0.54	-0.17	-0.28	-0.21	-0.23	0.08	0.35
YBR178W	YBR178W										-0.37	-0.47		0.54
YBR179C	FZO1	0.04	-0.04	1.05	0.1	-0.2	0	-0.02	0.07	-0.25	0.14	0.31	-0.1	-0.13
YBR180W	DTR1	0	0.27	0.27	-0.14	-0.32	-0.07	-0.18	0.07	0.37	0.38	-0.98	-0.3	-0.08
YBR181C	RPS6B	0.11	-0.28	0.68	-0.28	-0.41	-0.11	-0.02	-0.16	-0.27	-0.23	-0.25	-0.23	-0.24
YBR182C	SMP1	-0.02	0.29	0.32	0.38	0.18	0.21	-0.02	-0.04	1.01	-0.59	0.68	0.43	0.46
YBR183W	YPC1	-0.28	0.28	1.14	0.55	0.53	0.13	0.15	-0.03	0.82	0.62	-0.77	1.61	0.84
YBR184W	YBR184W		-0.24	0.88		-0.1	-0.86	-0.06	-0.62	0.17	-0.06	-0.36	-0.01	-0.1
YBR185C	MBA1	0.15	0.17	1.2	-0.21	0.31	0.17	0.07	0.67	-0.63	0.53	0.23	0.97	0.02
YBR186W	PCH2										-0.05	-0.21		0.22
YBR187W	YBR187W	-0.02	-0.02	0.67	-0.1	-0.34	-0.07	0.05	-0.24	-0.5	0.04	-0.27	-0.2	-0.23
YBR188C	NTC20										-1.93	-0.45		-0.88
YBR189W	RPS9B	0.04	-0.21	0.64	-0.56	-0.34	-0.02	0.12	-0.09	-0.31	0.02	0.12	-0.21	0
YBR190W	YBR190W	0.19	0.15	0.62	-0.73	0.07	0.02	-0.15	-0.07	-0.49	0.03	-0.46	-0.17	-0.15
YBR191W	RPL21A	0.13	-0.15	0.86	-0.39	-0.14	0.09	0.12	-0.05	-0.36	0.03	0.17	-0.06	-0.01
YBR192W	RIM2	0.14	-0.13	1.15	-0.32	-0.11	0.09	-0.02	0.21	-0.38	0.3	-0.24	0.06	-0.45
YBR193C	MED8	-0.03	-0.27	0.83	-0.09	-0.08	-0.03	-0.05	-0.17	-0.23	0.2	0.05	-0.12	-0.07
YBR194W	YBR194W	-0.02	-0.69	0.6	0.26	-0.18	-0.07	0.12	0.37	0.02	-0.18	-0.18	0	0.24
YBR195C	MSI1	0.07	0.04	0.88	-0.22	-0.39	0.08	-0.27	-0.23	-0.55	0.36	0.09	-0.21	-0.29
YBR196C	PGI1	-0.28	0.01	0.67	0.44	0.04	-0.36	-0.22	-0.37	0.53	-0.91	-0.16	-0.24	0.06
YBR197C	YBR197C	-0.02	-0.03	0.73	-0.5	-0.05	-0.24	-0.15	-0.12	-0.32	0.05	0.05	-0.16	0.03
YBR198C	TAF5	0.19	0.36	1.04	-0.43	0.02	0	-0.02	-0.28	0.04	0.53	0.38	-0.15	0
YBR199W	KTR4	0.11	-0.16	1.03	0.49	0.07	0.17	0.14	-0.11	0.15	0.17	0.26	-0.03	0.1
YBR200W	BEM1	0.02	-0.11	1.22	0.1	-0.15	0.12	0.17	-0.21	0.04	-0.07	0.29	-0.25	-0.44
YBR201W	DER1	0.25	-0.41	0.8	0.02	0.54	0.06	0.27	0.62	0.9	-0.52	-0.31	-0.17	0.2
YBR202W	CDC47	0.24	0.16	0.98	-0.5	-0.29	-0.03	-0.12	-0.12	-0.21	0.03	0.11	-0.15	-0.14
YBR203W	COS111	-0.21	-0.18	0.5	-0.24	-0.39	0.05	-0.2	0.03	0.36	-0.14	0.09	0.81	0.29
YBR204C	YBR204C	0.17	-0.06	1.27	0.06	0.2	0.25	0.07	-0.2	0.13	-0.07	-0.21	0.25	0.09
YBR205W	KTR3	-0.06	-0.17	0.78	-0.54	-0.15	-0.16	-0.17	-0.12	-0.45	-0.27	0.1	-0.27	-0.3
YBR206W	YBR206W	0.16	-0.09	1.01	-0.34	-0.03	0.17	0.01	-0.01	-0.25	0.11	0.28	-0.02	0.05
YBR207W	FTH1	-0.2	0.06	0.63	0.23	0.08	-0.22	-0.4	-0.05	-0.42	0.16	0.12	0.01	0.01
YBR208C	DUR1,2	-0.19	0.09	1.31	0.8	-0.62	0	-0.09	-0.56	0.73	-0.48	-0.25	-0.87	-0.43
YBR209W	YBR209W
YBR210W	ERV15	0.02	0.01	0.65	0.35	-0.14	-0.15	-0.06	0.04	-0.16	-0.16	-0.07	-0.06	0.06
YBR211C	AME1	0.06	-0.34	0.75	0.22	-0.34	-0.05	-0.32	-0.16	-0.45	-0.04	-0.12	-0.19	-0.4
YBR212W	NGR1	-0.21	0.06	1	0.49	0.39	-0.1	-0.07	0.08	-0.14	0.02	0.59	0.63	-0.17
YBR213W	MET8	0.11	0.33	0.98	-0.29	-0.16	0.06	-0.08	-0.03	0.21	0.53	-0.27	0.24	0.31
YBR214W	SDS24	-0.29	0.17	1.36	0.49	0.63	0.33	-0.51	0.04	0.24	0.26	0.32	1.02	0.9
YBR215W	HPC2	0.21	0.09	1.25	0.29	-0.1	0.05	0.11	-0.15	0.2	-0.28	0.1	-0.03	-0.35
YBR216C	YBP1	-0.14	0.38	0.96	-0.62	-0.26	-0.1	-0.12	-0.27	-0.18	-0.17	0.12	-0.16	-0.16
YBR217W	ATG12		-0.08	1.19		-0.15		0.22		-0.38	-0.19	-0.07	-0.29	-0.04
YBR218C	PYC2	-0.02	0.22	0.78	-0.1	0.13	-0.12	-0.16	-0.17	0.77	-0.35	0.97	-0.65	-0.44
YBR219C	YBR219C						-0.12				0.45	0.16		0.02
YBR220C	YBR220C	-0.18	0.11	0.48	-0.61	-0.47	-0.33	-0.22	-0.13	-0.39	-0.11	-0.07	-0.28	-0.55
YBR221C	PDB1	-0.17	0.08	0.87	0.78	0.1	-0.15	-0.11	0.04	0.14	-0.43	0.07	0.14	-0.04
YBR222C	PCS60	-0.18	0.05	0.77	0.65	0.18	0.01	-0.18	0.18	0.39	-0.4	0.18	0.04	-0.01
YBR223C	TDP1	0.21	0.49	1.04	-0.08	0.24	0.11	-0.31	0.08	0.18	-0.22	0.37	0.13	0.15
YBR224W	YBR224W				0.17
YBR225W	YBR225W	-0.08	0.21	0.88	-0.07	0.06	-0.07	-0.07	0.08	-0.1	-0.05	-0.13	0.2	0.13
YBR226C	YBR226C										0.44	-1.29		-0.21
YBR227C	MCX1	-0.06	-0.1	0.73	0.11	-0.09	-0.18	-0.15	-0.23	0.14	0.03	0.22	-0.55	-0.44
YBR228W	SLX1	0.21	0.02	0.92	0.33	0.03	0.08	0.1	0.12	0.18	0.19	-0.35	-0.16	-0.51
YBR229C	ROT2	-0.11	0.03	0.99	-0.34	0.17	-0.37	0.15	-0.16	-0.31	-0.06	0.1	0.02	0.07
YBR230C	YBR230C	0.22	0.41	1.46	0.32	0.47	0.17	0.43	0.62	-0.04	0.62	-0.55	1.24	0.41
YBR231C	SWC5	-0.03	0.05	1.09	-0.16	0.11	0.16	-0.01	0.04	-0.06	0.4	0.02	-0.41	-0.02
YBR232C	YBR232C										-0.88	-0.24		-0.78
YBR233W	PBP2	0.12	0.05	1.29	0	0.16	0.01	0.23	-0.07	-0.2	-0.04	0.27	-0.28	-0.47
YBR233W-A	DAD3	0.02	0.26	0.63	-0.19	-0.37	-0.13	-0.16	-0.22	-0.76	-0.09	-0.14	-0.35	-0.35
YBR234C	ARC40	0.01	0.04	1.38	0.44	0.33	0.17	0.19	0.11	0.16	0.24	0.31	0.25	0.5
YBR235W	YBR235W	-0.09	0	0.91	-0.21	0.15	-0.18	-0.07	-0.2	-0.16	-0.18	-0.35	-0.13	-0.3
YBR236C	ABD1	0.3	0.1	1.25	0.39	0.03	0.28	0.15	0.21	0.42	0.2	0.14	0.07	-0.18
YBR237W	PRP5	0.01	0.22	1.02	0.3	-0.12	0.01	0.22	-0.14	0.32	-0.19	-0.01	-0.2	-0.36
YBR238C	YBR238C	-0.05	0.13	0.25	-0.83	-0.52	-0.46	-0.37	-0.24	0.03	-1.2	0.19	-0.39	0.02
YBR239C	YBR239C	-0.05	0.19	0.79	-0.27	-0.28	-0.19	-0.17	-0.05	0	-0.7	-0.06	-0.04	0.23
YBR240C	THI2		-0.22	0.72		-0.09	-0.16	-0.07		0.38	-0.12	-0.3	0.09	0.21
YBR241C	YBR241C	-0.06	0.2	1.03	0.83	0.41	0.15	0.32	0.12	0.49	0.72	0.09	0.64	0.71
YBR242W	YBR242W	0.12	-0.18	0.81	-0.07	-0.23	-0.08	0.24	0.03	0.66	-0.18	0.1	-0.11	-0.16
YBR243C	ALG7	-0.24	-0.1	0.51	0.03	0.27	-0.34	-0.19	-0.06	-0.13	-0.06	-0.33	-0.35	-0.43
YBR244W	GPX2	-0.14	-0.35	0.78	0.09	0.81	-0.22	0.12	-0.07	-0.17	0.12	0.59	-0.41	-0.4
YBR245C	ISW1	0.06	-0.07	1.12	-0.14	-0.33	0.11	-0.08	-0.11	-0.06	-0.28	0.01	-0.36	0.08
YBR246W	YBR246W	-0.01	-0.09	0.92	-0.51	-0.24	-0.09	-0.24	0.03	0.29	-0.01	-0.22	-0.03	0.13
YBR247C	ENP1	0.12	0.14	1.02	-0.78	-0.36	-0.13	0.03	-0.13	-0.22	0	0.15	-0.3	-0.33
YBR248C	HIS7	0.2	0.14	1	0.77	-0.14	0.14	0.07	0.02	0.44	0.06	0.34	-0.52	-0.46
YBR249C	ARO4	-0.2	-0.15	0.67	0.27	-0.39	-0.24	-0.23	-0.03	0.23	-0.51	0.15	-0.51	-0.42
YBR250W	YBR250W										-0.23	-0.18		-0.01
YBR251W	MRPS5	0.25	0.11	1.36	0.04	-0.14	0.27	0.26	0.48	-0.54	0.62	0.19	0.51	-0.04
YBR252W	DUT1	-0.01	-0.23	0.84	-0.48	-0.34	-0.08	-0.2	-0.16	-0.57	0.02	-0.45	-0.33	-0.1
YBR253W	SRB6	-0.09	-0.38	1.02	0.28	-0.29	0.06	0.02	-0.19	-0.01	-0.09	-0.17	-0.3	0.32
YBR254C	TRS20	0.11	-0.16	0.94	0.19	-0.51	-0.06	0.1	-0.06	-0.11	-0.42	-0.25	0.06	-0.14
YBR255C-A	YBR255C-A										-1.17		-0.02	-1.28
YBR255W	YBR255W	-0.07	0.02	1.14	0.27	-0.25	0.15	0.06	-0.42	0.27	0.24	0.05	-0.17	-0.54
YBR256C	RIB5	-0.04	-0.41	1.15	1.65	-0.2	0.06	0.03	0.08	0.72	0.19	0.12	-0.38	-0.32
YBR257W	POP4	0.18	0.04	1.2	0.39	-0.22	0.36	0.3	0.09	0.37	0.54	0.05	0.24	0.18
YBR258C	SHG1	0.07	-0.07	1.07	0.43	-0.13	0.23	0.1	0	0.59	-0.42	-0.46	0.31	-0.31
YBR259W	YBR259W	-0.12	0	1	-0.35	0	-0.11	0.15	-0.16	0.18	-0.33	-0.45	-0.07	-0.26
YBR260C	RGD1	-0.1	-0.01	0.92	-0.51	-0.02	-0.07	0	-0.24	-0.15	-0.18	0.06	-0.28	0.02
YBR261C	YBR261C	0.01	-0.38	0.75	-0.19	-0.22	0.04	-0.04	-0.13	-0.3	0.1	0.17	-0.44	0.05
YBR262C	YBR262C	0.1	0.1	0.99	0.52	-0.32	0.14	-0.12	0.37	-0.74	0.99	-0.03	0.62	-0.09
YBR263W	SHM1	-0.02	-0.05	0.79	-0.47	-0.16	-0.04	-0.23	-0.05	-0.24	0.1	0.17	0.07	-0.43
YBR264C	YPT10	0.02	-0.29	0.79	-0.03	-0.19	0.02	-0.18	-0.25	-0.32	0.75	-0.28	0.41	-0.67
YBR265W	TSC10	-0.18	0	0.59	-0.45	-0.49	-0.07	-0.37	-0.33	-0.96	0.27	-0.15	-0.36	-0.88
YBR266C	SLM6										-0.3	0.08		-0.5
YBR267W	REI1	0.27	0.17	1.3	-0.3	-0.67	0.09	0.21	0.04	-0.01	0.02	0.19	0.18	-0.07
YBR268W	MRPL37	0.26	-0.05	1.51	-0.04	-0.01	0.25	0.2	0.36	-0.74	0.78	-0.1	0.42	0.23
YBR269C	YBR269C	-0.21	-0.12	0.81	0.73	0.11	0.23	-0.29	0.02	-0.56	0.5	0.16	1.07	0.6
YBR270C	YBR270C	-0.14	0.21	1.3	-0.13	-0.18	0.13	0.28	0.09	0.16	0.09	0.18	0.11	-0.07
YBR271W	YBR271W	0.01	-0.09	0.75	-0.71	-0.59	-0.2	-0.09	-0.21	-0.33	-0.16	0.21	-0.41	-0.8
YBR272C	HSM3	0.08	-0.04	1.04	0.11	-0.02	0.01	0.05	-0.05	0.25	-0.17	0.05	0.26	-0.05
YBR273C	UBX7	0	-0.12	0.99	0.53	-0.05	0.13	0.14	-0.39	-0.17	0.26	0.18	0.23	-0.02
YBR274W	CHK1	0.01	-0.08	0.9	0.03	0.06	-0.18	-0.07	-0.2	-0.14	-0.31	0	0.16	-0.61
YBR275C	RIF1	-0.03	0.18	1.18	0.04	-0.25	-0.03	0.12	-0.27	-0.01	-0.78	-0.06	-0.23	-0.14
YBR276C	PPS1	-0.1	-0.02	1.17	-0.55	0.01	0.02	-0.1	-0.22	0.16	-0.25	-0.04	-0.18	-0.47
YBR277C	YBR277C							0.2			-0.29	-0.71		-0.19
YBR278W	DPB3	0.2	-0.24	0.95	0.37	-0.02	0.34	0.27	-0.08	-0.01	-0.01	-0.39	-0.01	-0.11
YBR279W	PAF1	-0.27	0.01	1.25	0.16	-0.45	0.17	0.11	-0.5	0.1	-0.24	0.27	-0.76	-0.08
YBR280C	YBR280C	-0.13	0.11	0.99	0.26	0.24	0.3	-0.01	0.03	0.22	0.4	-0.19	0.02	0.21
YBR281C	YBR281C	-0.13	0.03	1.08	-0.31	0.31	0.02	0.13	-0.26	0.1	-0.06	-0.01	-0.17	-0.52
YBR282W	MRPL27	0.03	0.07	1.35	0.12	-0.01	0.33	0	0.39	-0.41	0.08	0.24	0.38	0.01
YBR283C	SSH1	-0.14	-0.06	0.75	-0.09	-0.02	-0.2	-0.05	-0.18	-0.17	0.18	-0.22	-0.08	-0.06
YBR284W	YBR284W										0.07	0.61	0.6	0.34
YBR285W	YBR285W				0.37	0.27		-0.12			0.84	-0.35	0.02	0.13
YBR286W	APE3	-0.03	0.04	1.05	0.01	0.1	-0.04	0.2	-0.19	-0.21	0.78	0.6	0.38	-0.21
YBR287W	YBR287W	-0.17	0.02	1.01	0.41	-0.04	-0.14	-0.31	-0.23	0.44	1.79	-0.49	-0.12	-0.24
YBR288C	APM3	0.08	-0.19	0.88	-0.08	-0.13	0.03	-0.01	-0.12	-0.52	0.21	0.25	-0.31	-0.09
YBR289W	SNF5	0.19	0.35	1.14	-0.15	-0.02	0	0.22	0.16	-0.1	0.28	0.24	-0.07	0.4
YBR290W	BSD2	-0.07	-0.1	0.81	0.29	-0.15	0.16	0.09	-0.17	0.01	0.27	-0.25	-0.06	-0.21
YBR291C	CTP1	0.01	0.98	0.77	0.68	1.06	1.4	0.61	1.47	1.53	-0.44	0.18	1.89	0.8
YBR292C	YBR292C			1.15		0.27		0.24		-0.83	1.29	0.33	0.72	0.01
YBR293W	VBA2	-0.06	0.11	0.7	0.76	-0.22	-0.21	0.01	-0.05	0.23	-0.1	0.04	-0.15	-0.24
YBR294W	SUL1				1.13	-0.04					0.41	-1.48	-0.44	-2.96
YBR295W	PCA1	-0.11	0.37	1.05	0.77	0.24	0.31	-0.18	0.12	1.22	-0.81	0.31	0.56	0.28
YBR296C	PHO89	-0.4	-0.23	0.5	0.95	1	-1.3	-4	-1.66	0.35	-3.21	-1.36	-3.61	-3.11
YBR297W	MAL33	-0.05	-0.23	0.72	2.15	-0.33	0.06	-0.08	0.52	0.96	-0.22	0.36	0.99	-0.12
YBR298C	MAL31	-0.2	0.07	0.3	0.05	-0.46	-0.24	-0.47	-0.04	0.22	-0.02	-0.19	0.5	0.14
YBR299W	MAL32					0.19		-0.3			-0.48	-0.15		0.3
YBR300C	YBR300C										0.07	1.05		0.38
YBR301W	DAN3	0.07	0.17	-0.25	0.45	0.61	-0.01	0.03	-0.1	0.82	-0.41	0.22	0.3	0.19
YBR302C	COS2	0.04	-0.04	0.1	0.53	0.58	-0.16	0.44	0.21	0.22	0.87	0.6	0.53	0.72
YCL001W	RER1	-0.05	0.01	-0.21	-0.16	-0.24	0.06	-0.07	0.1	-0.35	0.08	-0.15	-0.03	0.16
YCL001W-A	YCL001W-A										-0.52	-0.23		0.26
YCL001W-B	YCL001W-B				-0.62						-0.5	-0.32		0.75
YCL002C	YCL002C	0.04	0.1	-0.4	-0.04	-0.21	-0.01	-0.1	-0.01	-0.14	0.36	-0.23	0.15	-0.13
YCL004W	PGS1	0.05	0.22	0.02	-0.22	0	-0.04	0.39	0.12	0.39	-0.4	-0.03	0.06	0.12
YCL005W	YCL005W	-0.08	0.15	-0.55	0.19	-0.05	-0.19	0.06	0.01	0.01	0.06	-0.25	0.29	0
YCL007C	YCL007C				-0.34						-0.34	-1.1		0.51
YCL008C	STP22	0.27	0.57	-0.1	-0.3	0.18	-0.08	0.13	0.04	0.02	-0.09	0.11	0.27	-0.08
YCL009C	ILV6	0.12	0.13	-0.1	0.53	0.11	0.16	-0.01	0.32	0.05	0.56	1.13	0.07	0.91
YCL010C	SGF29	0.1	0.34	-0.25	-0.49	-0.26	-0.11	-0.32	-0.16	-0.37	-0.53	-0.22	-0.19	-0.47
YCL011C	GBP2	-0.02	-0.01	-0.05	-0.87	-0.41	-0.1	-0.12	-0.29	-0.31	0.29	0.05	-0.29	-0.6
YCL014W	BUD3	0.05	0.05	0.06	-0.44	0.15	-0.34	0.14	-0.15	-0.11	-0.37	0.33	-0.43	0.29
YCL016C	DCC1	0.11	-0.12	-0.13	-0.06	-0.05	-0.02	-0.03	0.13	-0.18	0.27	-0.1	-0.05	-0.15
YCL017C	NFS1	-0.01	0.2	-0.04	0.33	-0.17	0.05	0.09	0.06	-0.04	-0.48	0.26	0.28	-0.09
YCL018W	LEU2	-0.38	0.4	0.13	1.11	-0.51	-0.81	-0.28	-0.18	0.32	0.09	-0.75	-0.78	-0.21
YCL021W-A	YCL021W-A	0.04	0.04	-1.01	-0.12	0.63	-0.54	0.08	0.07	1.07	-0.43	0.83	0.13	-0.2
YCL022C	YCL022C						0.19				-0.65	-0.43		-0.81
YCL023C	YCL023C										0.16	-0.07		1.02
YCL024W	KCC4	0.01	0.29	0.14	-0.4	-0.05	0.05	0.04	-0.28	-0.39	0.2	0.17	-0.2	-0.56
YCL025C	AGP1	-0.39	-0.11	-0.3	1.3	-0.63	-0.62	-0.57	-0.68	-0.72	0.28	-0.84	-1.53	-1.15
YCL026C-A	FRM2				2.89			-0.35		0.85	-0.61	-0.82	-0.94	0.14
YCL026C-B	YCL026C-B	-0.19	-0.07	-0.27	-0.57	0.61	0.15	-0.21	0.39	0.45	0.55	0.08	0.2	1.28
YCL027W	FUS1		0.61	-0.17		0.11		0.39		0.16	0.7	-0.38	2.56	-0.22
YCL028W	RNQ1	0.05	0.03	0.14	-0.02	0.15	-0.03	0.13	-0.05	-0.28	0.32	0.23	-0.06	0
YCL029C	BIK1	-0.09	0.05	0.03	-0.04	-0.23	-0.07	0.08	-0.34	-0.18	-0.1	0.2	-0.29	-0.48
YCL030C	HIS4	0.17	0.55	0.22	1.01	0.39	0.19	0.16	0.11	0.56	-0.06	1.18	-0.72	-0.15
YCL031C	RRP7	0.11	-0.1	0.21	0.07	-0.17	0.11	0.18	-0.09	0.16	0.02	-0.06	-0.07	-0.06
YCL032W	STE50	-0.12	-0.27	0	0.34	-0.21	-0.05	0.24	-0.21	-0.03	0.43	0.01	-0.02	-0.15
YCL033C	YCL033C	0.2	0.1	0.56	0.28	0.37	0.42	0.33	0.16	0.56	0.38	-0.24	0.79	0.79
YCL034W	LSB5	-0.06	-0.15	-0.12	0	0	0.03	0.17	-0.19	-0.33	0.94	0	-0.13	0.02
YCL035C	GRX1	-0.18	-0.34	0.38	0.22	0.1	0	-0.05	-0.25	0.29	-0.21	-0.42	-0.12	0.58
YCL036W	GFD2	-0.11	0.3	0.24	-0.96	-0.5	0.05	0.4	-0.13	0.52	0.47	-0.21	0.17	-1
YCL037C	SRO9	0.03	0.37	0.06	-0.69	0.09	-0.4	0.16	-0.24	0.16	-1.6	0.15	-0.09	0.11
YCL038C	ATG22	-0.31	-0.14	-0.38	0.83	0.34	-0.3	-0.04	-0.26	0.88	-0.73	-0.42	0.64	0.48
YCL039W	GID7	0	-0.01	-0.05	0.11	0.31	0.18	0.01	0	0.26	0.12	0.06	-0.04	-0.16
YCL040W	GLK1	-0.27	0.15	0.79	1.07	1.76	0.34	-0.48	-0.03	0.27	1.08	-0.16	1.7	0.29
YCL041C	YCL041C									0.59	0.29	-0.01	0.43	0.28
YCL042W	YCL042W										-0.69	-1.87		-0.03
YCL043C	PDI1	0.1	0.04	0.24	0.09	0.92	0.1	0.3	0.44	0.69	-0.09	0.42	-0.02	0.36
YCL044C	YCL044C	-0.21	-0.11	-0.24	-0.31	0.31	-0.47	-0.15	0.2	-0.09	-0.68	0.11	-0.14	-0.08
YCL045C	YCL045C	-0.15	-0.05	-0.12	-0.25	-0.09	-0.13	-0.04	-0.4	-0.26	-0.47	0.32	-0.22	-0.01
YCL046W	YCL046W							-0.04			0.47	0.13		-0.83
YCL047C	YCL047C	0.04	-0.18	0.04	0.02	0.57	-0.01	0.2	0.07	-0.03	-0.03	-0.45	-0.19	0.05
YCL048W	SPS22							-0.16		1.35	0.01	0.18		-0.38
YCL049C	YCL049C	-0.09	-0.41	0.13	0.6	0.12	0.1	0.5	0.54	0.39	-0.06	0.13	0.93	0.26
YCL050C	APA1	-0.13	-0.21	-0.17	-0.37	0.05	-0.18	0.24	-0.29	0.25	-0.2	-0.11	-0.33	0.02
YCL051W	LRE1	0.06	-0.04	0.06	-0.15	0.24	0.04	-0.13	-0.03	-0.05	0.15	-0.01	-0.34	-0.03
YCL052C	PBN1	0.17	-0.11	0.25	0.26	0.21	0.19	0.05	0.2	0.23	0.39	0.34	0.21	0.19
YCL054W	SPB1	0.27	0.32	0.58	-0.15	-0.36	0.14	0.39	-0.07	0.47	0.29	0.28	-0.17	-0.29
YCL055W	KAR4	0.47	0.08	0.34	0.36	0	0.07	0.26	0.35	0.59	0.07	0.14	0.91	0.3
YCL056C	YCL056C	0.03	-0.25	-0.09	0.21	-0.41	-0.07	-0.1	-0.24	-0.07	0.22	-0.04	-0.06	-0.02
YCL057C-A	YCL057C-A	0.02	-0.06	-0.06	-0.03	-0.03	-0.11	-0.04	0.4	-0.95	0.46	0.19	0.61	0.51
YCL057W	PRD1	-0.21	0.05	0.28	-0.58	0.48	0	0.17	-0.1	0.19	-0.1	0.17	0.09	-0.36
YCL058C	FYV5					0.18		-0.13			0.09	-0.16	-0.32	1.25
YCL059C	KRR1	0.34	-0.19	-0.04	0.06	-0.56	0.17	0.01	-0.17	-0.01	-0.03	-0.05	-0.12	-0.41
YCL061C	MRC1	0.23	0.27	0.32	0.11	0.06	0.12	0.1	-0.16	0.04	-0.54	-0.17	-0.19	-0.63
YCL063W	VAC17	0.05	-0.1	-0.18	-0.89	0.14	-0.24	-0.32	-0.36	-0.43	-0.2	0.24	-0.52	-0.1
YCL064C	CHA1	0.03	0.25	0	1.71	-0.18	0.45	0.27	-0.13	1.42	-0.19	0.49	-0.32	0.72
YCL065W	YCL065W					-0.14		0.01			-0.31		0.03
YCL066W	HMLALPHA1		0.1	0.15	0.29	0.02		0.44	0	-0.45	-0.39	-0.16	0.14	0.61
YCL067C	HMLALPHA2	-0.13	-0.26	0.07	0.21	-0.26	0.15	-0.1	-0.08	-0.09	-0.1	-0.24	-0.3	0.23
YCL068C	YCL068C		-0.02	-0.23	-0.56	-0.33		-0.52		-0.18	-0.08	-0.09	-0.06	-0.44
YCL069W	VBA3										-1.5	-0.7	-0.33	-0.27
YCL073C	YCL073C	0.19	-0.36		-0.55	-0.09	-0.17	-0.33	0.21	0.01	0.78	0.65	-0.07	1.07
YCL076W	YCL076W
YCR001W	YCR001W				-0.25						-0.76	0.14		1.17
YCR002C	CDC10	-0.18	-0.32	-0.24	0.08	-0.25	-0.08	-0.24	-0.21	-0.08	-0.09	-0.12	0.03	-0.04
YCR003W	MRPL32	0.27	-0.03	0.5	0.12	-0.17	0.44	0.14	0.4	-0.44	0.62	-0.08	0.52	0.09
YCR004C	YCP4	0.06	0.04	0.24	-0.1	0.07	-0.03	0.34	-0.05	-0.12	0.26	-0.02	0.49	-0.2
YCR005C	CIT2	-0.32	0.24	0.35	1.19	0.44	0.21	-0.57	-0.14	0.72	-1.12	-0.78	-0.01	0.22
YCR006C	YCR006C					-0.11		-0.4		-0.17	0.2	0.09	-0.23	-0.49
YCR007C	YCR007C	-0.06	0.17	-0.04	1.15	0.16	0.18	0.09	0.16	0.21	-0.09	1.57	0.33	0.5
YCR008W	SAT4	0.05	0.03	-0.18	-0.97	0.21	-0.14	-0.27	-0.12	-0.24	0.08	-0.12	-0.33	-0.2
YCR009C	RVS161	-0.14	-0.37	-0.05	0.29	-0.25	-0.14	0.01	-0.36	-0.15	-0.21	-0.05	0.11	0.3
YCR010C	ADY2										2.85	-0.06		0.5
YCR011C	ADP1	-0.07	0.3	0.25	0.14	0.25	0.05	0.03	-0.25	0.17	0.08	0.07	-0.16	-0.15
YCR012W	PGK1	-0.24	0.21	0.19	0.46	0.48	-0.33	0.15	-0.21	0.27	-1.05	-0.02	0.03	0.16
YCR013C	YCR013C	0.12	0.18	-0.13	-0.01	0.4	0.06	0.2	0.05	-0.17	-0.6	-0.51	-0.17	-0.29
YCR014C	POL4	0.11	0.04	0.02	-0.03	-0.2	0.1	-0.05	-0.17	0.02	-0.72	-0.14	-0.27	-0.43
YCR015C	YCR015C	0.29	-0.04	0.19	0.05	-0.02	0.12	-0.15	-0.1	0.36	0.48	-0.04	0.43	-0.65
YCR016W	YCR016W	0.03	0.05	0.14	0.08	-0.71	0.02	0.14	-0.31	-0.12	0.13	0.14	-0.28	-0.33
YCR017C	CWH43	-0.12	-0.16	-0.29	0.5	-0.07	-0.21	-0.02	-0.13	0.02	-0.06	0.01	0.05	-0.33
YCR018C	SRD1										-0.56	-0.2		-1.49
YCR018C-A	YCR018C-A				-0.28						0.7	-0.45		1.01
YCR019W	MAK32	-0.03	-0.09	-0.13	-0.01	-0.04	-0.42	-0.04	-0.25	-0.11	-0.46	-0.22	-0.35	-0.46
YCR020C	PET18	0.09	0	0.06	0.12	0.2	0	0.2	0.23	0.12	0.19	-0.09	-0.17	0.25
YCR020C-A	MAK31	0.02	-0.28	-0.55	0.52	-0.36	-0.16	-0.63	0.34	-0.04	0.88	-1.03	-0.21	0.1
YCR020W-B	HTL1	0.36	-0.05	0.47	0.25	-0.07	0.15	0.32	0.34	0.18	-0.93	-0.41	-0.1	-0.2
YCR021C	HSP30	-0.01	0.82	0.39	1.93	-0.51	0.28	-0.61	-0.25	-0.19	1.82	0.88	0.14	0.92
YCR022C	YCR022C							-0.13			-0.12	0.69	0.26	0.14
YCR023C	YCR023C	-0.18	0.03	-0.23	0.8	-0.04	-0.2	0.21	-0.02	-0.41	-0.32	-0.07	-0.3	-0.09
YCR024C	SLM5	-0.18	0.03	0.09	-0.71	0.36	-0.1	-0.27	0.46	0.35	-0.09	-0.34	0.41	-0.07
YCR024C-A	PMP1	-0.27	0.07	-0.05	-0.31	-0.11	-0.44	-0.28	-0.3	-0.44	-0.33	-0.75	-0.01	0.19
YCR025C	YCR025C	-0.56	0.04	-0.13	-0.14						-0.01	-0.3		-0.06
YCR026C	YCR026C	-0.04	-0.14	-0.1	-0.11	-0.12	-0.06	-0.11	-0.23	0.07	0.1	0.18	-0.29	-0.22
YCR027C	RHB1	-0.04	-0.02	-0.09	0.02	-0.21	-0.07	-0.22	-0.14	-0.12	-0.01	-0.09	0.09	-0.28
YCR028C	FEN2	-0.36	-0.03	-0.27	-0.02	-0.27	-0.33	-0.28	-0.31	-0.23	-0.29	0.19	-0.27	-0.42
YCR028C-A	RIM1	-0.19	-0.24	-0.03	-0.16	-0.23	-0.08	-0.27	-0.02	-0.57	0.06	-0.11	-0.02	0.2
YCR030C	SYP1	-0.23	-0.2	-0.1	0.01	0.13	-0.11	-0.12	-0.23	-0.13	-0.07	0.23	0.14	0.77
YCR031C	RPS14A	-0.15	-0.25	-0.26	-0.3	-0.18	-0.24	-0.25	-0.14	-0.66	-0.18	-0.14	-0.22	0.24
YCR032W	BPH1	-0.05	0.01	0.11	0.18	0.01	0.01	-0.17	-0.03	0.02	-0.32	0.24	-0.13	-0.07
YCR033W	SNT1	-0.14	0.21	-0.14	-0.36	-0.08	-0.15	-0.1	-0.56	-0.14	-0.46	-0.04	-0.24	-0.25
YCR034W	FEN1	-0.08	0	-0.29	0.08	-0.22	-0.07	-0.09	0.06	-0.09	0.18	-0.09	0.19	0.21
YCR035C	RRP43	-0.11	-0.05	-0.06	-0.04	-0.3	0.1	-0.05	-0.1	0.01	0.06	0.13	-0.49	-0.36
YCR036W	RBK1	-0.1	-0.1	0.38	0.38	-0.04	0.26	0.2	0.08	0.44	-0.04	-0.09	0.61	0.31
YCR037C	PHO87	-0.09	0.33	0.14	0.67	0.3	0.12	0.81	-0.11	0.48	0.7	0.86	0.71	0.86
YCR038C	BUD5	0.03	0.06	-0.12	-0.32	0.22	-0.12	-0.04	0.22	-0.42	-0.35	0.09	-0.05	-0.36
YCR038W-A	YCR038W-A		0.2								-0.8	-0.62	-0.16	-0.49
YCR039C	MATALPHA2	-0.08	-0.25	0.05	0.23	-0.23	0.2	-0.05	-0.06	-0.14	-0.06	-0.27	-0.37	0.34
YCR040W	MATALPHA1		0.06	-0.02	0.24	0.28		0.15		-0.33	-0.29	-0.22	0.02	0.34
YCR041W	YCR041W	-0.06	0.1	-0.09	-0.21	-0.13	-0.09	0.02	0.26	-0.27	-0.24	-0.19	-0.12	0.04
YCR042C	TAF2	0.05	0.08	0.14	0.07	-0.02	-0.01	0.09	-0.08	0.1	0.08	0.08	0.03	0.02
YCR043C	YCR043C	0.01	0	-0.26	-0.29	-0.32	-0.11	-0.14	0.24	0.06	-0.18	-0.7	0.04	-0.03
YCR044C	PER1	-0.01	-0.03	-0.2	0.31	0.04	0.07	0.16	-0.13	-0.33	0.54	0.24	0.2	-0.05
YCR045C	YCR045C							0.18			0.07	-0.95	-0.29	-0.36
YCR046C	IMG1	0.16	0.11	0.14	-0.43	0.16	0.31	-0.14	0.6	-0.88	1.11	0.28	0.42	0.47
YCR047C	BUD23	0.06	0.14	-0.17	-0.52	-0.45	-0.13	0.08	-0.07	-0.09	0.35	-0.06	-0.12	-0.74
YCR048W	ARE1	-0.1	-0.08	-0.26	0.29	0.17	-0.04	-0.05	0.01	0.29	-0.11	0.55	-0.18	0.29
YCR049C	YCR049C							0.02			-0.05	0.01	-0.03	0.56
YCR050C	YCR050C							-0.13			-0.61	-0.04		-0.17
YCR051W	YCR051W	0.06	-0.32	-0.29	-0.43	-0.26	0.07	-0.24	0.12	-0.59	0.32	0.21	-0.43	-0.02
YCR052W	RSC6	-0.1	0.05	-0.16	-0.45	-0.18	-0.12	-0.01	-0.11	-0.02	0.04	0.15	-0.36	0.01
YCR053W	THR4	-0.23	-0.04	-0.21	0.01	0.04	-0.33	-0.36	-0.12	0.21	-0.46	0.07	-0.51	-0.29
YCR054C	CTR86	0.09	0.08	0.16	-0.22	-0.13	-0.12	0.29	0.18	0.2	-0.01	0.03	0.34	-0.51
YCR057C	PWP2	0.2	0.25	0.11	-0.71	-0.31	-0.14	0.13	0.12	0.08	-0.08	0.13	-0.12	-0.63
YCR059C	YIH1	0.1	0	-0.07	0.2	0.06	0.16	0	0.23	0.2	0.08	0.09	0.16	0.51
YCR060W	TAH1	0.09	-0.3	-0.2	0.84	0.51	0.46	0.62	0.13	1.11	-0.57	-0.61	0.17	-0.06
YCR061W	YCR061W	-0.26	0.1	-0.02	0.13	0.41	-0.14	0.45	-0.13	0.24	-0.64	-0.57	0.6	-0.32
YCR063W	BUD31	0.07	-0.13	-0.02	-0.43	-0.39	0.01	-0.14	-0.12	-0.03	-0.16	0.19	-0.12	-0.15
YCR064C	YCR064C		0.11			-0.22		0.52		0.27	1.7	0.21	0.07	0.81
YCR065W	HCM1	0.02	0.17	-0.04	-0.37	-0.15	0.11	-0.16	-0.24	-0.28	-0.85	-0.21	-0.04	-0.15
YCR066W	RAD18	0.02	-0.02	0.1	-0.03	-0.08	-0.1	0.09	0.08	0.24	-0.47	0.06	-0.03	-0.07
YCR067C	SED4	0	0.24	0.04	0.25	0.28	0.07	0.11	0.12	0.2	0	0.33	0.22	0.37
YCR068W	ATG15			0.19	-0.28	-0.04		-0.07		0.06	-0.1	0.22	-0.25	-0.4
YCR069W	CPR4	-0.11	-0.01	-0.01	0.12	0.02	0.03	-0.02	-0.11	-0.03	-0.16	0.1	0	0.13
YCR071C	IMG2	0.3	-0.09	0.48	0.06	-0.03	0.36	-0.03	0.47	-0.77	1.02	0.19	0.24	-0.05
YCR072C	YCR072C	0.23	0.3	0.33	-0.75	-0.23	-0.07	0.18	0.28	0.15	0.13	0.15	-0.03	-0.38
YCR073C	SSK22	0.04	0.16	0.12	0.27	-0.23	0.26	0.33	0.37	1.02	-0.64	-0.21	0.34	0.21
YCR073W-A	SOL2	-0.07	0.07	0.02	0	0.15	-0.01	0	0.09	-0.08	0.78	0.02	0.67	0.21
YCR075C	ERS1	-0.08	-0.06	-0.06	-0.06	0.15	0.11	0.13	-0.09	-0.62	0.39	-0.06	0.1	0.26
YCR076C	YCR076C	0.08	-0.1	-0.27	-0.06	-0.01	-0.04	0.03	-0.17	-0.12	-0.08	-0.02	0.18	0
YCR077C	PAT1	0.01	0.15	0	-0.56	-0.34	-0.01	-0.18	-0.22	-0.27	0.08	0.16	-0.02	-0.03
YCR079W	YCR079W	-0.11	-0.05	-0.27	0.19	-0.11	0.06	-0.33	-0.18	-0.21	-0.04	-0.36	0.39	-0.46
YCR081W	SRB8	0.11	0.23	0.09	0.17	-0.01	-0.01	-0.09	-0.05	0.13	-0.24	-0.02	0.05	-0.51
YCR082W	YCR082W	0.01	-0.22	0.28	-0.01	-0.01	0.16	0.15	0.17	-0.08	-0.11	0.04	-0.05	-0.25
YCR083W	TRX3	-0.01	-0.41	0.28	0.54	0.1	0.14	-0.09	0.22	-0.22	0.09	-0.13	0.68	0.51
YCR084C	TUP1	-0.07	0.21	0.17	-0.49	-0.2	-0.06	-0.06	-0.2	-0.09	-0.07	0.33	-0.05	0.42
YCR085W	YCR085W							0.06					-0.04
YCR086W	CSM1	0.05	-0.07	-0.02	-0.07	-0.2	0.37	0.37	-0.06	0.16	-0.52	-0.06	-0.03	0.18
YCR087C-A	YCR087C-A	0.21	-0.23	-0.15	-0.2	-0.44	0.08	-0.09	-0.16	-0.49	0.37	0.25	-0.13	0.01
YCR087W	YCR087W							0.22			0.09	-0.1	-0.31	-0.1
YCR088W	ABP1	-0.18	0.11	-0.04	-0.1	0.23	-0.23	0.01	-0.41	-0.07	0.05	0.37	-0.04	0.15
YCR089W	FIG2	0.1	0.56	0.2	0.51	0.22	-0.15	0.23	0.01	0.38	0.75	0.54	1.31	0.12
YCR090C	YCR090C	0.09	-0.26	-0.14	-0.04	-0.17	0.09	-0.05	0.08	0.16	-0.49	-0.24	-0.33	0.05
YCR091W	KIN82			0.2	0.24	0.26		-0.07		-0.02	0.18	0.33	0.1	-0.11
YCR092C	MSH3	-0.07	0.03	0.03	-0.26	-0.2	-0.04	-0.01	-0.2	-0.12	0.34	0.2	-0.3	-0.13
YCR093W	CDC39	-0.04	0.32	0.15	-0.41	-0.02	-0.24	-0.11	-0.16	0.13	0.04	0.28	-0.15	0.15
YCR094W	CDC50	0.01	-0.19	-0.2	0.08	-0.05	-0.1	0.15	-0.21	-0.13	-0.28	0.43	-0.25	-0.13
YCR095C	YCR095C	-0.02	-0.46	-0.3	0.31	-0.32	-0.03	-0.04	-0.19	-0.14	-0.42	-0.06	-0.1	-0.13
YCR096C	HMRA2	0	-0.27	0.1	0.24	-0.16	0.28	-0.02	-0.06	-0.11	-0.05	-0.27	-0.38	0.25
YCR097W	HMRA1	0.15	-0.32	0.17	0.37	0	0.16	0.07	-0.01	0.33	-0.03	-0.42	0.27	0.64
YCR097W-A	YCR097W-A	-0.04	-0.05	-0.14	-0.4	0.12	-0.16	0.05	-0.28	-0.29	0.12	-0.32	-0.11	0.36
YCR098C	GIT1	0.62	0.35	0.24	0.1	-0.82	-0.24	-2.27	0.53	-2.1	-1.59	-2.59	0.17	-2.07
YCR099C	YCR099C	0.19	-0.07	0.51	0.32	-0.02	0.25	-0.06	0.23	1.93	-0.73	-0.62	0.75	-0.38
YCR100C	YCR100C		-0.02	0.28	-0.04	0.09	0.01	0.03	-0.29	1.96	-0.93	-0.52	0.69	-0.56
YCR101C	YCR101C	0.18	0.15	0.55	0.44	-0.07	0.22	-0.02	0.16	1.69	-0.76	-0.69	0.85	-0.21
YCR102C	YCR102C	-0.12	-0.11	0.5	-0.24	0.21	0.21	0.09	0.28	1.05	-0.44	0.75	0.23	-0.51
YCR102W-A	YCR102W-A										-1.56	0.39	0.01	0.3
YCR104W	PAU3	-0.01	0.07	-0.3	0.43	0.57	0.01	0.09	-0.04	1.04	-0.35	0.24	0.33	0.33
YCR105W	ADH7		-0.31	-0.13	0.19	-0.32		-0.52	0.17	0.02	0.05	-0.66	-0.05	0.14
YCR106W	RDS1	0.16	0.21	0.05	0.01	-0.13	-0.68	-0.13	-0.11	-0.07	-0.37	-0.21	0	-0.42
YCR107W	AAD3				0.1	0.01					-0.43	0.12	-0.29	-0.75
YDL001W	RMD1	0.03	-0.11	-0.26	-0.14	-0.23	-0.12	-0.02	-0.18	-0.35	0.33	-0.39	-0.22	-0.29
YDL002C	NHP10	0.14	-0.08	0.01	0.05	-0.27	-0.02	-0.1	-0.32	-0.1	-0.03	-0.27	-0.2	-0.01
YDL003W	MCD1	0.09	0.04	0.19	-0.01	-0.21	0.25	0.24	0.03	-0.05	-0.1	-0.04	-0.59	-0.51
YDL004W	ATP16	-0.08	-0.02	-0.12	-0.02	-0.12	-0.09	-0.21	0.43	-1.14	0.39	-0.08	0.48	0.01
YDL005C	MED2	-0.16	-0.17	-0.15	0.22	-0.16	-0.02	0.06	-0.55	-0.14	0.01	0.04	-0.29	-0.14
YDL006W	PTC1	0.12	-0.16	-0.12	0.03	0.04	0.16	0.13	0.09	0.19	-0.62	0.02	-0.08	-0.1
YDL007W	RPT2	-0.1	-0.13	0.38	-0.1	0.07	0.24	0.46	-0.29	0.34	-0.26	0.28	-0.08	-0.45
YDL008W	APC11	0.14	-0.34	0.05	0.09	-0.32	0.01	0.08	0.19	-0.67	0.02	-0.42	-0.1	0.03
YDL009C	YDL009C							-0.05				-0.15	0.39	0.08
YDL010W	YDL010W	-0.04	-0.34	-0.19	0.6	-0.17	0.29	-0.04	-0.32	-0.22	0.02	0.02	-0.2	0.27
YDL011C	YDL011C					-0.53		-0.15			-0.16	-1.01		0.74
YDL012C	YDL012C	-0.1	-0.21	-0.33	0.01	-0.08	-0.18	-0.2	-0.17	-0.33	0.02	-0.24	-0.34	0.57
YDL013W	HEX3	0.12	0.18	0	0.12	-0.12	0.09	0.06	-0.11	0.02	0.45	0.1	-0.07	0.14
YDL014W	NOP1	-0.01	-0.16	-0.17	-0.92	-0.33	-0.06	-0.29	-0.05	-0.33	0.11	0.05	-0.24	0.11
YDL015C	TSC13	-0.39	-0.22	-0.27	0.03	-0.13	-0.28	-0.16	-0.29	-0.08	-0.48	-0.23	0.05	-0.01
YDL016C	YDL016C										-0.01	-0.93		-0.88
YDL017W	CDC7	0	0.04	0.02	-0.13	0.02	-0.21	0.09	0.1	0.24	0.1	-0.16	-0.03	-0.13
YDL018C	ERP3	-0.02	-0.45	-0.26	-0.05	-0.16	0.1	-0.1	-0.13	-0.48	0.46	-0.48	0.07	-0.09
YDL019C	OSH2	-0.18	-0.1	-0.08	-0.37	0.33	-0.17	-0.11	-0.32	-0.31	-0.01	0.09	-0.23	0.4
YDL020C	RPN4	-0.16	-0.37	-0.04	0.41	0.4	0.2	-0.31	0.07	-0.21	0.3	0.14	0.03	0.15
YDL021W	GPM2	-0.04	-0.11	0.26	0.38	1.5	0.12	-0.32	-0.34	1.87	-0.23	-1.55	0.23	-0.02
YDL022W	GPD1	-0.38	-0.24	0.24	-0.98	1.48	-0.13	0.01	0.02	-0.61	1.11	0.02	0.25	0.69
YDL023C	YDL023C							-0.15			0.44	-0.32	-0.24	0.32
YDL024C	DIA3	-0.34	0.03	0.24	0.88	0.76		-0.23		0.97	-0.11	0.64	0.05	0.88
YDL025C	YDL025C	0.23	-0.16	-0.15	0.18	0.63	-0.09	0.07	-0.12	-0.16	-0.06	0.21	-0.25	-0.13
YDL026W	YDL026W		0.17		0.33			0.09			-0.05	-0.32	-0.09	0.23
YDL027C	YDL027C	-0.03	-0.3	0.1	0.18	0.57	0.13	-0.2	0.23	0.08	0.08	-0.24	0.34	0.3
YDL028C	MPS1	-0.03	0.16	-0.03	-0.06	-0.06	-0.1	0.07	-0.09	-0.05	-0.34	0.11	-0.37	-0.05
YDL029W	ARP2	-0.12	-0.1	0.07	0.19	-0.06	-0.04	-0.05	-0.15	-0.08	0.04	0.04	0.19	0.08
YDL030W	PRP9	0.12	0.04	0.02	-0.06	-0.12	-0.06	0.41	0.01	-0.12	0.38	0.21	-0.22	-0.41
YDL031W	DBP10	0.16	0.04	0.13	-0.52	-0.65	-0.25	-0.06	-0.42	-0.36	0.05	0.25	-0.52	-0.39
YDL032W	YDL032W							0.05			0.09			-0.44
YDL033C	SLM3	0.05	-0.01	-0.04	-0.62	0.12	0.09	0.3	0.1	0.02	0.08	-0.1	0	-0.29
YDL034W	YDL034W										0.08	1.01	-0.2	0.79
YDL035C	GPR1	-0.09	-0.06	-0.07	0.64	-0.04	-0.05	-0.06	-0.29	0.33	-0.44	0.02	-0.3	-0.57
YDL036C	YDL036C	0.14	0.04	0.01	-0.34	-0.38	0.01	0.04	-0.39	-0.42	-0.26	0.07	-0.46	-0.3
YDL037C	BSC1		0.03			-0.47		0.08			-0.52	-1.73	-0.58	1
YDL038C	YDL038C	0.13	0.27	0.78		0.52	-0.41	-0.74	-1.13	1.67	-0.48	-0.34	-1.17	0.71
YDL039C	PRM7	-0.03	0.33	0.58	0.22	0.45	-0.22	-0.57	-0.68	1.4	-0.17	-0.28	-0.44	0.8
YDL040C	NAT1	-0.07	-0.12	-0.24	-0.52	-0.22	-0.29	-0.13	-0.33	-0.31	-0.46	0.01	-0.5	-0.36
YDL041W	YDL041W					0.02		0.11			0.33	-0.73	-0.4	-1.05
YDL042C	SIR2	0.06	-0.04	-0.48	-0.86	-0.66	-0.51	-0.6	-0.28	-0.25	-0.07	-0.71	-0.38	-0.64
YDL043C	PRP11	-0.02	-0.1	-0.14	-0.1	-0.59	-0.41	-0.29	-0.23	-0.08	-0.39	-0.34	0.05	-0.74
YDL044C	MTF2	0.19	0.12	0.28	0.27	-0.24	0.14	0.24	0.01	-0.1	0.63	0.04	0.29	-0.25
YDL045C	FAD1	0.11	-0.1	0.09	0.44	-0.06	0.22	0.11	0.01	0.11	0.38	0.18	0.26	0.18
YDL045W-A	MRP10	0.17	0.01	0.22	-0.04	0.03	0.03	0.04	0.5	-0.24	-0.65	-0.4	0.03	0.03
YDL046W	YDL046W	-0.06	0.06	0.29	0.52	0.21	0.03	-0.25	0.11	-0.12	0.59	-0.13	0.45	-0.14
YDL047W	SIT4	0.04	0.06	-0.09	-0.57	-0.06	-0.05	-0.04	-0.02	-0.04	-0.33	-0.2	-0.23	0.08
YDL048C	STP4	-0.03	0.38	0	-1.11	-1.01	0.09	-0.49	-0.43	-0.48	-0.07	-0.52	0.18	0.8
YDL049C	KNH1	0.44	-0.07	-0.22	-0.1	-0.92	0.23	-0.52	0.35	-0.62	0.61	-0.34	-0.01	0.46
YDL050C	YDL050C		0.06	0.09	-0.29	-0.05	0.22	0.18	-0.01	0.19	-0.52	-0.31	-0.09	-0.26
YDL051W	LHP1	0.24	-0.3	-0.09	-0.44	-0.42	0.06	-0.04	-0.01	0	0.04	-0.25	-0.31	-0.17
YDL052C	SLC1	0	0	-0.24	0.01	0.44	-0.01	-0.03	0.1	0.02	-0.08	0.06	-0.07	0.17
YDL053C	PBP4	0.14	-0.23	-0.14	0.1	0.26	0.09	-0.09	-0.04	0.14	0.52	-0.14	-0.21	-0.02
YDL054C	MCH1	-0.12	0.16	-0.23	1.2	0.14	-0.05	0.14	-0.07	0.18	-0.05	0.1	0.02	-0.06
YDL055C	PSA1	0.15	0.22	-0.01	-0.26	-0.13	0.32	-0.03	0.21	0.13	-0.06	-0.51	-0.02	0.21
YDL056W	MBP1	0.11	0.33	0.35	0.06	0.06	-0.03	0.06	-0.23	0	0.27	0.07	-0.23	0.01
YDL057W	YDL057W	0.22	0.3	0.35	0.58	0.38	0.27	0.23	-0.29	0.92	-0.44	-0.24	0.55	0.39
YDL058W	USO1	-0.13	-0.03	0.21	-0.12	-0.01	-0.17	0.06	-0.54	-0.22	-0.26	0.1	-0.38	-0.13
YDL059C	RAD59	0.28	0.07	0.32	0.5	0.47	0.24	0.46	-0.11	0.6	0.7	-0.17	0.21	0.01
YDL060W	TSR1	0.16	0.27	0.07	-0.49	-0.61	-0.18	0.15	-0.24	0.1	-0.18	0.48	-0.33	-0.57
YDL061C	RPS29B	0.05	-0.29	-0.11	-0.03	-0.08	-0.06	-0.2	-0.02	-0.18	0.31	-0.2	-0.13	0.39
YDL062W	YDL062W										0.12	-0.49		-1.3
YDL063C	YDL063C	0.15	0.04	-0.06	-0.51	-0.57	-0.17	-0.03	-0.13	-0.08	0.06	0.08	-0.28	-0.69
YDL064W	UBC9	0.13	-0.13	-0.09	-0.44	0.04	0.06	-0.06	0.1	-0.23	-0.02	0.02	-0.18	0.1
YDL065C	PEX19	0.1	-0.02	0.26	0.23	0.07	0.23	0.44	-0.22	0.21	0.25	0.13	0.07	0.07
YDL066W	IDP1	-0.01	0.04	0.08	1.1	-0.22	-0.28	-0.15	-0.16	0.38	-1.4	0.14	0.12	0.03
YDL067C	COX9	0.02	-0.01	-0.13	0.73	-0.12	0.1	-0.1	0.5	-0.32	0.57	-0.18	0.54	-0.03
YDL068W	YDL068W	0.35		-0.27	-0.58	-0.29	-0.28	0.11	-0.11	0.13	0.03	-0.12	0.11	0.46
YDL069C	CBS1	-0.09	-0.52	-0.26	0.14	-0.23	0.04	-0.1	0.04	0.41	-0.1	-0.38	-0.26	-0.07
YDL070W	BDF2	-0.34	0.3	0.64	-0.29	0.1	0.25	0.16	-0.17	-0.31	0.36	0.6	-0.44	0.08
YDL071C	YDL071C	-0.32	-0.12	-0.54	0.33	0.1	-0.3	-0.29	-0.2	0.32	-0.28	-0.67	0.08	-0.44
YDL072C	YDL072C	-0.25	-0.13	0.05	0.66	0.48	-0.12	0.44	0.03	0.5	-0.62	-0.1	0.59	0.37
YDL073W	YDL073W	-0.07	-0.12	0	-0.09	0.27	-0.23	0.03	-0.18	0.1	-0.56	-0.2	-0.37	-0.72
YDL074C	BRE1	0.12	0.05	0.12	-0.1	-0.11	0.1	-0.01	-0.27	0.1	-0.12	0.02	-0.32	-0.22
YDL075W	RPL31A	0.04	-0.45	-0.06	-0.71	-0.24	-0.05	0.16	-0.03	0.01	-0.65	0.09	-0.51	0.08
YDL076C	RXT3	0.12	-0.06	0.03	-0.06	0.1	0.11	0.09	0	0.3	0.16	-0.02	-0.05	-0.54
YDL077C	VAM6	0.19	-0.01	0.04	-0.41	0.02	0.06	-0.1	0.07	0.18	-0.41	0.1	-0.02	-0.1
YDL078C	MDH3	0.05	-0.04	0.13	-0.12	0	0.07	0.08	-0.08	-0.18	-0.05	-0.12	0.52	-0.34
YDL079C	MRK1					-1.17		0.26		0.77	0.62	0.68	1.1	0.12
YDL080C	THI3	-0.15	-0.25	-0.2	-0.18	-0.29	-0.09	-0.28	0.02	0.14	-0.37	-0.34	-0.24	-0.47
YDL081C	RPP1A	-0.01	-0.42	-0.36	-0.76	-0.3	-0.25	-0.42	-0.09	-0.52	-1.45	-0.61	-0.43	0.15
YDL082W	RPL13A	-0.05	-0.31	-0.22	-0.62	-0.28	-0.15	-0.07	-0.13	-0.32	0.28	-0.08	-0.33	0.01
YDL083C	RPS16B	0.01	-0.16	-0.07	-0.43	-0.07	-0.03	-0.03	-0.01	-0.39	0.13	0.11	-0.11	0.11
YDL084W	SUB2	0.13	0.17	0.14	-0.36	0.25	0.05	0.03	-0.05	-0.08	-0.12	0.02	0.01	0.13
YDL085C-A	YDL085C-A	-0.06	-0.05	0.21	0.65	0.01	-0.1	0.19	-0.02	-0.13	-0.98	-0.24	0.1	-0.05
YDL085W	NDE2					0.3		-0.1			1.72	-0.48	0.93	-1.32
YDL086W	YDL086W	-0.06	-0.11	0.29	0.51	0.19	-0.1	0.18	-0.02	0.15	0.05	-0.23	0.2	0.66
YDL087C	LUC7	-0.14	-0.11	-0.08	-0.04	-0.49	-0.12	-0.44	-0.25	-0.04	0	-0.15	0	-0.55
YDL088C	ASM4	0.01	-0.01	0.04	-0.12	-0.02	0.01	0.11	0.05	0.05	0.53	0.2	-0.15	-0.24
YDL089W	YDL089W	-0.13	-0.26	-0.37	-0.24	0.26	-0.2	-0.08	-0.19	-0.28	-0.21	0.25	-0.13	-0.18
YDL090C	RAM1	-0.33	-0.21	-0.45	-0.14	-0.38	-0.24	-0.25	-0.43	-0.46	-0.18	-0.08	-0.23	-0.32
YDL091C	UBX3	-0.04	-0.16	-0.02	0.22	0.14	0	0.01	-0.06	-0.12	0.26	0.1	0.06	0.13
YDL092W	SRP14	-0.11	-0.47	-0.21	0.06	-0.32	-0.22	-0.38	-0.19	-0.46	-0.45	-0.48	-0.27	-0.4
YDL093W	PMT5	-0.25	-0.01	-0.39	-0.35	0.04	-0.2	-0.21	-0.16	-0.27	-0.68	0.13	-0.29	-0.06
YDL094C	YDL094C	-0.78		0.09		-0.5		-0.01	-0.04		0.22	-0.73	-0.12	-0.24
YDL095W	PMT1	-0.28	0.04	-0.05	-0.59	0.57	-0.29	-0.17	0.02	-0.09	-0.24	0.09	-0.39	-0.09
YDL096C	YDL096C						-0.08	-0.09			0.12	-0.21	-0.22	-0.51
YDL097C	RPN6	-0.14	-0.03	0.58	-0.01	0.27	0.2	0.44	0.01	0.02	0.29	0.14	0.02	0.17
YDL098C	SNU23	-0.05	-0.12	0.25	-0.06	0.3	0.19	0.38	0.01	-0.25	0.6	-0.03	0.15	0.17
YDL099W	YDL099W	-0.2	0.15	0.44	0.35	0.01	0.39	0.57	-0.25	0.4	0.15	0.52	-0.09	0.06
YDL100C	ARR4	-0.04	-0.21	0.25	-0.29	0.36	0.11	0.29	0.17	0.16	-0.26	-0.16	0	0.06
YDL101C	DUN1	-0.29	-0.12	0.05	0.17	0.01	0.2	-0.18	-0.2	0.19	-0.47	-0.28	-0.24	-0.16
YDL102W	CDC2	0.12	0.04	0.09	-0.29	-0.03	0.08	0.04	0.13	-0.13	0.27	0.29	-0.12	-0.04
YDL103C	QRI1	0.12	-0.07	0.15	0.14	0.03	0.2	0.15	0.11	0.02	0.26	0.25	-0.08	-0.09
YDL104C	QRI7	-0.01	-0.04	-0.02	0.03	-0.16	0.07	-0.29	0.25	-0.16	-0.22	-0.11	0.01	-0.34
YDL105W	NSE4		0.08	0.4		-0.22		0.26	-0.14	-0.44	-0.93	-0.36	0.07	-0.32
YDL106C	PHO2	-0.06	0.12	-0.21	0	-0.15	-0.12	-0.17	-0.1	-0.03	-0.5	0.14	-0.03	0.16
YDL107W	MSS2	-0.1	-0.12	0.45	0.15	-0.18	0.2	0.01	0.18	-0.18	0.35	-0.32	0.22	-0.29
YDL108W	KIN28	-0.21	-0.29	-0.09	-0.21	-0.14	-0.15	-0.02	0.04	0.15	-0.19	-0.2	-0.22	-0.09
YDL109C	YDL109C	-0.12	0.04	0.01				0.08		-0.06	-0.32	-0.17	-0.3	-0.93
YDL110C	YDL110C	0.14	-0.22	0.69	0.3	0.57	0.64	0.24	0.55	0.63	0.84	-0.38	0.98	0.72
YDL111C	RRP42	0.02	0.01	0.02	-0.39	-0.1	-0.07	-0.35	-0.04	-0.18	-0.03	-0.04	-0.12	0.37
YDL112W	TRM3	-0.1	-0.08	-0.15	-0.56	-0.57	-0.17	-0.13	-0.07	-0.47	-0.2	0.24	-0.3	-0.33
YDL113C	ATG20	-0.2	-0.21	0.27	0.48	0	0.27	-0.02	-0.07	0.12	0.31	0.03	-0.07	-0.28
YDL114W	YDL114W										0.57	0.95
YDL114W-A	YDL114W-A										-0.62	-0.02		0.06
YDL115C	IWR1	-0.1	-0.21	0.11	0.55	-0.12	0.12	0.07	-0.2	-0.05	0.37	0.22	-0.23	-0.29
YDL116W	NUP84	-0.01	-0.03	-0.05	-0.2	-0.35	-0.03	-0.14	0.01	-0.19	-0.61	-0.12	-0.23	-0.31
YDL117W	CYK3	-0.02	0.29	0.18	-0.11	0.02	0.19	0.15	0.12	0.38	-0.18	0.32	-0.08	0.24
YDL118W	YDL118W				-0.24	0.17	-0.09	0.31	0.04		-0.03	-0.47	-0.12	0.53
YDL119C	YDL119C	0.07	-0.08	-0.11	-0.08	-0.01	-0.02	0.37	0.07	0.83	-0.28	0.1	0.2	0.03
YDL120W	YFH1	0.07	-0.37	0.01	-0.07	0.11	0.1	0.21	0.27	-0.32	0.49	0.16	-0.04	0.2
YDL121C	YDL121C	-0.03	-0.56	-0.24	0.23	-0.27	-0.11	-0.03	0.03	-0.24	0.73	0.26	-0.34	0.16
YDL122W	UBP1	0.23	0.08	0.19	-0.28	0.08	0.07	0.29	-0.02	0.39	-0.01	0.43	-0.13	-0.15
YDL123W	SNA4	-0.06	0.01	-0.01	0.09	0.09	-0.08	0.2	0.02	0.27	0.81	0.18	0.3	0.23
YDL124W	YDL124W	0.08	-0.27	-0.14	-0.72	1.19	0.12	0.13	0.18	0.17	0.84	0.37	-0.01	0.58
YDL125C	HNT1	0.02	-0.18	-0.24	0.28	0.2	-0.02	0.11	0.13	0.16	0.09	-0.62	0.02	0.33
YDL126C	CDC48	0.03	0.04	0.51	-0.33	0.25	0.11	0.28	0.11	0.27	0.39	0.25	0.09	0.22
YDL127W	PCL2	0.11	-0.02	-0.32	-0.5	-0.46	-0.13	0.29	-0.21	-0.45	-0.09	-0.27	-0.24	0.17
YDL128W	VCX1	-0.18	-0.04	-0.45	0.72	-0.11	-0.06	-0.13	-0.03	-0.25	0.42	0	0.25	0.28
YDL129W	YDL129W	0.2	0.18	0.09	-0.08	-0.41	-0.19	0.26	0.15	-0.23	0.51	0.2	0.14	0.05
YDL130W	RPP1B	0.03	-0.28	-0.31	-0.34	-0.1	-0.1	-0.2	-0.07	-0.44	-0.86	-0.4	-0.28	-0.11
YDL130W-A	STF1	0.01	-0.28	0.58	0.17	0.64	0.04	0.03	-0.11	0.46	-0.29	-0.32	0.15	0.83
YDL131W	LYS21	0.2	0.3	-0.2	0.8	0.31	0.27	0.3	0.69	0.92	-0.68	0.36	0.21	0.38
YDL132W	CDC53	-0.01	-0.05	0.33	-0.38	0.27	0.18	0.33	0.04	0.45	-0.05	0.18	-0.14	-0.22
YDL133C-A	RPL41B	0.11	-0.19	0.1	-0.35	-0.13	0.04	0.09	0.02	-0.11	0.14	-0.55	-0.27	0.28
YDL133W	YDL133W	0.19	0.02	0.03	-0.17	-0.09	0.16	0.1	0.14	0.17	0.46	0.33	-0.13	-0.08
YDL134C	PPH21	0.12	0.14	0.15	-0.13	0.03	0.23	-0.05	-0.03	0.16	0.11	0.24	0	0.4
YDL135C	RDI1	0.01	-0.12	0.31	0.23	-0.14	0.36	0.16	0.06	0.35	0	-0.17	0.32	-0.15
YDL136W	RPL35B	-0.05	-0.49	-0.12	-0.34	-0.23	-0.13	-0.07	-0.22	-0.39	0.02	-0.34	-0.23	0.13
YDL137W	ARF2	0.17	0.16	0.21	0.51	0.39	0.15	0.01	0.2	0.06	-0.02	0.05	0.56	0.83
YDL138W	RGT2	-0.44	-0.18	-0.24	-0.08	-0.1	-0.37	-0.45	-0.58	0.15	-1.07	-0.43	0.01	-0.33
YDL139C	SCM3	0.13	0.03	0.44	0.31	-0.07	0.31	0.39	-0.22	0.39	-0.13	0.09	0.31	0.4
YDL140C	RPO21	-0.16	-0.02	-0.05	-0.19	-0.06	-0.2	-0.14	-0.22	0.27	0.26	0.36	-0.09	0.41
YDL141W	BPL1	-0.11	0.05	-0.13	-0.11	0.15	-0.19	-0.03	-0.05	0.05	0.06	0.19	0.02	0.02
YDL142C	CRD1	0.02	-0.04	-0.23	0.33	0.05	0.05	-0.09	-0.17	-0.16	0.26	-0.2	0.63	0.37
YDL143W	CCT4	0.31	0.22	0.31	0.08	0.06	0.31	0.26	0.22	0.16	0.51	0.33	0.16	0.17
YDL144C	YDL144C	0.02	0.19	0.17	-0.32	-0.17	0.15	-0.08	0.08	-0.17	0.3	0.05	0.3	-0.27
YDL145C	COP1	-0.03	0.11	0.21	-0.51	0.23	0.06	-0.1	-0.11	0.1	-0.39	0.21	-0.26	-0.09
YDL146W	YDL146W	-0.21	-0.01	-0.18	0.05	0.35	-0.13	0.14	0.01	0.59	-0.09	0.1	0.04	0.43
YDL147W	RPN5	-0.1	-0.13	0.27	0.21	0.39	0.08	0.31	-0.04	0.44	0.17	0.02	-0.15	-0.38
YDL148C	NOP14	0.21	0.16	0.05	-0.23	-0.41	-0.11	0.24	-0.34	0.06	-0.21	0.41	-0.37	-0.67
YDL149W	ATG9	0.04	0.1	0.25	0.12	0.39	0.26	-0.04	0.15	0.01	0.3	0.17	0.2	0.07
YDL150W	RPC53	-0.05	-0.06	0.1	-0.42	-0.64	-0.09	0	-0.34	0.15	0.33	0.08	-0.41	-0.28
YDL151C	BUD30	0.44	0.22	0.08	-0.59		-0.27	0.01	-0.2	0.08	-0.52	-0.34	0.08	-0.42
YDL152W	YDL152W
YDL153C	SAS10	0.24	0.16	0.15	0.23	-0.59	0.08	0.24	-0.08	0.17	0.32	0.42	-0.25	-0.48
YDL154W	MSH5	-0.36	-0.31	-0.46	0.09	-0.18	-0.44	-0.68	-0.25	-0.36	-0.4	-0.09	-0.24	-0.11
YDL155W	CLB3	0.02	0	-0.1	-0.33	-0.24	-0.12	-0.05	-0.12	-0.13	-0.13	-0.27	-0.39	-0.03
YDL156W	YDL156W	0.29	0.24	0.11	-0.11	0.56	-0.04	-0.1	-0.08	-0.09	-0.08	-0.23	-0.13	0.4
YDL157C	YDL157C	0.14	-0.38	-0.01	0.08	0	0.2	0.02	0.37	-0.15	0.3	-0.26	0.09	0.31
YDL158C	YDL158C	-0.02	-0.48	-0.47	-0.59	-0.33	-0.04	-0.04	0.27	-0.68	0	-0.55	0.02	-0.14
YDL159W	STE7	0.06	-0.27	-0.12	-0.01	0.13	-0.05	-0.03	-0.09	0	0.13	0.16	-0.14	-0.14
YDL159W-A	YDL159W-A
YDL160C	DHH1	-0.11	0.29	-0.01	-0.44	0.04	-0.16	0.13	-0.07	0.08	-0.67	0.33	-0.03	0.33
YDL161W	ENT1	0.01	-0.1	0.11	0.38	-0.32	-0.09	0.09	-0.44	-0.2	-0.13	0.3	-0.33	-0.18
YDL162C	YDL162C										-1.92	-0.78		-1.16
YDL163W	YDL163W										0.05			-0.45
YDL164C	CDC9	0.2	0.14	-0.08	-0.49	0.29	0.18	-0.09	0.02	0.03	-0.11	-0.01	-0.09	-0.43
YDL165W	CDC36	0.02	-0.14	-0.06	0.22	0.42	0.02	0.11	0.02	-0.22	0.36	0.01	0.07	-0.09
YDL166C	FAP7	0.43	-0.04	0.15	0.22	-0.04	0.26	0.23	0.18	0.08	0.19	0.05	-0.15	0.34
YDL167C	NRP1	-0.02	0.02	-0.04	-0.18	-0.37	-0.1	0.06	-0.11	0.01	-0.1	0.09	-0.15	-0.27
YDL168W	SFA1	-0.16	0.02	-0.09	-0.62	0.28	-0.09	0.01	-0.02	0.11	0.43	-0.05	-0.11	-0.21
YDL169C	UGX2	-0.3	0.02	1.16	0.97	0.53	-0.25	0.14		-0.01	0.93	-0.25	0.71	0.43
YDL170W	UGA3	0.14	0.15	0	0.59	-0.05	0.08	-0.1	0.28	0.19	-0.21	0.08	-0.5	-0.04
YDL171C	GLT1	0.06	-0.1	-0.27	0.2	-0.06	-0.11	0	0.09	0.14	0.32	0.04	-0.15	-0.02
YDL172C	YDL172C		0.09								-0.31	-0.19		0
YDL173W	YDL173W	-0.11	-0.08	0.33	0.72	0.39	0.2	-0.01	-0.17	-0.18	0.25	0.12	-0.1	0.25
YDL174C	DLD1	-0.15	-0.03	0.25	0.02	0.35	0.27	-0.1	0.18	-0.82	0.23	-0.5	-0.09	-0.19
YDL175C	AIR2	-0.16	-0.31	-0.12	0.12	-0.19	-0.06	0.18	0.26	0	0	0.15	-0.37	-0.26
YDL176W	YDL176W	-0.29	-0.17	-0.04	-0.05	0.19	-0.18	-0.03	-0.1	-0.14	-0.19	-0.15	-0.27	-0.12
YDL177C	YDL177C	-0.04	-0.14	0.17	0.29	0.2	0.16	0.07	0.09	0.06	0.05	-0.31	0.06	0.39
YDL178W	DLD2	-0.03	-0.27	-0.2	0.36	-0.15	-0.03	0.01	0.24	-0.35	-0.08	0	-0.03	-0.02
YDL179W	PCL9	-0.13	-0.22	-0.28	-0.57	-0.09	-0.16	-0.06	0	-0.03	-0.56	-0.19	-0.32	0.09
YDL180W	YDL180W	-0.21	0.03	-0.23	0.42	0.22	0.02	0.03	0.13	-0.26	0.32	0.18	-0.09	-0.38
YDL181W	INH1	0.07	0.05	0.18	-0.6	-0.1	0.08	-0.13	0.69	-1.7	0.36	-0.4	0.83	0.12
YDL182W	LYS20	0	0.88	-0.08	1.62	1.33	1.02	0.94	0.96	0.96	0.41	0.39	0.69	0.83
YDL183C	YDL183C		0.09	-0.09	-0.13			0.12		-0.1	0.61	-0.08	0.53	-0.06
YDL184C	RPL41A	0.01	-0.16	0.06	-0.38	-0.05	-0.05	0.03	0.07	-0.07	0.06	-0.47	-0.27	0.27
YDL185C-A	YDL185C-A	0.12	0.31	-0.24		0.55	-0.17	0	-0.01	0.34	0.03	-0.22	-0.27	-0.04
YDL185W	TFP1	-0.14	0.04	-0.29	0.17	0.25	-0.28	-0.13	-0.34	0.54	0.05	-0.02	0.03	-0.06
YDL186W	YDL186W										-0.62	-0.31		-0.18
YDL187C	YDL187C	-0.41	-0.06	-0.66	-0.38	-0.14	-0.4	-0.12	0.05	-0.02	-0.75	-1.18	-0.24	-0.58
YDL188C	PPH22	0.02	0.21	0.2	-0.04	0.21	0.04	0.09	-0.07	-0.17	-0.34	0.18	0.46	0.33
YDL189W	RBS1	0.12	-0.06	-0.07	-0.24	-0.09	-0.12	-0.09	-0.34	-0.39	-0.12	0.2	-0.62	-0.16
YDL190C	UFD2	-0.04	-0.13	0.09	-0.23	0.23	-0.08	-0.01	-0.02	0.2	-0.23	0.11	-0.33	-0.23
YDL191W	RPL35A	-0.09	-0.52	-0.11	-0.33	-0.19	-0.23	-0.12	-0.12	-0.42	-0.03	-0.38	-0.26	0.02
YDL192W	ARF1	0.16	-0.21	0.08	-0.04	0.15	0.16	-0.18	0.23	-0.1	-0.55	-0.32	-0.1	0.14
YDL193W	YDL193W	-0.12	-0.31	-0.45	-0.38	0.31	-0.37	-0.07	0.11	0.19	0.1	0.03	-0.68	-0.08
YDL194W	SNF3	0.09	0.01	-0.18	0.35	0.12	0.01	0.01	0.42	0.23	0.58	0.64	0.64	0.39
YDL195W	SEC31	-0.16	0.08	-0.1	-0.46	0.06	-0.17	-0.17	-0.28	-0.2	-0.13	0.16	-0.11	0.24
YDL196W	YDL196W											-0.41		-0.91
YDL197C	ASF2	-0.43	0.14	-0.03	-0.45	-0.22	0.03	0.08	-0.41	-0.64	0.13	-0.02	-0.27	-0.28
YDL198C	GGC1	-0.23	0.06	-0.3	1.15	-0.55	-0.19	-0.24	0.06	-0.16	0.33	0.43	-0.59	-0.74
YDL199C	YDL199C		0.19	-0.05	1.41	0.58		0.06		0.53	0.45	0.17	1.05	0.21
YDL200C	MGT1	0.14	-0.35	-0.31	0.56	-0.02	0.02	-0.22	0.11	0.16	-0.04	-0.31	0.29	0.06
YDL201W	TRM8	0.22	-0.1	0.05	-0.44	-0.47	0.11	-0.01	0.14	-0.05	0.11	0.11	-0.25	-0.11
YDL202W	MRPL11	0.18	-0.02	0.41	-0.08	0.06	0.28	0.16	0.46	-0.67	0.82	-0.09	0.51	-0.34
YDL203C	YDL203C	0	-0.1	-0.08	-0.34	0.01	-0.17	-0.07	-0.11	-0.31	-0.04	0.2	-0.35	-0.44
YDL204W	RTN2		0.17	0.89	0.18	0.36	0.31	-0.09		0.02	1.46	-0.03	1.23	0.3
YDL205C	HEM3	0.11	0.08	-0.06	-0.47	-0.39	-0.08	-0.11	0.12	-0.39	-1.02	-0.6	0.08	-1.07
YDL206W	YDL206W	0.04	0.07	0.07	0.34	0.66	0.1	0.25	0.36	0.68	0.58	-0.33	0.45	0.14
YDL207W	GLE1	0.01	-0.09	-0.14	0.08	-0.25	-0.03	-0.05	-0.49	-0.32	0.09	0.08	-0.23	-0.08
YDL208W	NHP2	0.36	-0.27	0.15	-0.19	-0.43	0.23	-0.05	0.12	-0.25	0.13	0.3	-0.29	0.49
YDL209C	CWC2	0.33	0.06	0.14	-0.4	0.05	0.25	-0.01	0.12	-0.18	0.53	0.26	-0.24	-0.3
YDL210W	UGA4	0.03	-0.19	-0.17		0.25	0.34	-0.24	0	0.18	-0.02	0.02	-0.35	-0.17
YDL211C	YDL211C	0.13	-0.07	-0.12	-0.34	-0.04	0.03	-0.17	0.09	-0.21	0.32	-0.03	-0.47	0.17
YDL212W	SHR3	-0.06	-0.32	-0.16	-0.04	-0.21	-0.31	-0.1	-0.08	0.07	-0.47	-0.31	-0.1	-0.06
YDL213C	NOP6	0.1	-0.24	0.12	-0.18	-0.38	0.11	0.01	-0.23	0.01	0.05	0.18	-0.33	-0.26
YDL214C	PRR2		0.14	0.16			0.3	0.1	0.01	0.2	0.14	0	-0.08	0.09
YDL215C	GDH2	-0.02	0.3	0.05	1.58	0.4	0.14	-0.07	0.08	0.66	0.32	0.24	0.77	-0.13
YDL216C	RRI1	0.01	-0.03	0.33	0.12	0.16	0.2	0.01	0.01	0.09	0.1	0.01	-0.06	0.07
YDL217C	TIM22	0.17	0.13	0.07	-0.42	-0.22	0.01	-0.14	0.15	-0.56	0.2	0.18	-0.22	-0.38
YDL218W	YDL218W	0.15	0.32	0.22	0.56	-0.03	0.1	-0.25	0.1	-0.14	0.45	-0.11	0.66	0.01
YDL219W	DTD1	-0.02	-0.45	-0.01	-0.1	-0.28	-0.13	0.03	-0.08	-0.16	-0.92	-0.75	-0.28	-0.14
YDL220C	CDC13		0.09	-0.06		0.21		0.07		-0.45	-0.02	0.02	-0.28	-0.25
YDL221W	YDL221W										-0.54	-0.57	0.13	0.34
YDL222C	FMP45							0.02			0.37	0.38	-0.1	-0.11
YDL223C	HBT1		0.34	0.31	0.06	0.02	-0.2	-0.02	-0.1	0.11	0.26	0.67	0.2	-0.2
YDL224C	WHI4	-0.21	0.01	-0.28	-0.25	-0.19	-0.19	-0.26	-0.28	-0.23	-0.38	0.06	-0.25	-0.03
YDL225W	SHS1	0.11	-0.05	0.05	0.14	0.08	0	0.08	-0.31	0.05	-0.31	0.19	-0.25	-0.53
YDL226C	GCS1	0.04	-0.17	0.03	-0.09	0	-0.01	0.12	-0.13	-0.38	0.46	0.04	-0.22	0.02
YDL227C	HO	0.22	0.19	0.08	-0.52	-0.79	0.26	-0.43	-0.67	-1.97	0.17	-0.4	-0.54	-1.08
YDL228C	YDL228C	0.13	0.03	-0.27	-0.08	-0.03	0.01	-0.1	0.31	0.06	-0.1	0.09	-0.03	-0.14
YDL229W	SSB1	-0.01	0.09	-0.23	0.19	0.19	-0.08	0.07	0.04	0.01	-0.41	0.21	-0.03	0.11
YDL230W	PTP1	-0.13	-0.31	0.04	0.71	0.17	-0.18	0.1	0.1	0.63	0.09	-0.31	0.29	-0.15
YDL231C	BRE4	-0.14	0.11	-0.02	0.09	-0.05	-0.2	-0.22	-0.32	0	0.16	-0.2	-0.44	-0.01
YDL232W	OST4	-0.06	-0.09	-0.11	-0.1	0.06	0.03	-0.19	0.18	-0.1	0.33	-0.11	-0.11	0.5
YDL233W	YDL233W	0.1	0.26	0.08	0.12	0.59	0.19	0.24	0.22	0.33	-0.14	0.51	0.54	0.05
YDL234C	GYP7	-0.09	0.2	-0.07	0.58	0.11	0.01	-0.1	-0.01	0.41	-0.39	0.42	0.33	-0.19
YDL235C	YPD1	0	-0.24	0.21	0.21	0.06	0.09	-0.14	0.26	0.48	-0.05	-0.18	-0.01	0.27
YDL236W	PHO13	-0.08	0.09	-0.34	0.14	-0.24	-0.12	-0.09	-0.01	0.02	-0.12	-0.3	0.1	-0.02
YDL237W	YDL237W	-0.17	0.05	-0.03	0.2	0.08	-0.17	0.12	-0.15	-0.36	0.02	-0.19	0.17	-0.01
YDL238C	GUD1	0	0.6	0.09	0.25	0.39	0.17	-0.3	-0.05	0.54	-0.41	-0.43	0.17	0.16
YDL239C	ADY3	-0.05	0	0.19	0.34	0.2	0.28	-0.07	-0.27	0.06	-0.1	-0.38	-0.48	-0.27
YDL240C-A	YDL240C-A										-0.9
YDL240W	LRG1	0.05	0.25	-0.06	-0.38	-0.03	0.03	-0.06	0.02	-0.37	0.07	-0.14	0.1	-0.25
YDL241W	YDL241W	-0.19	-0.79	-1.04	-0.68	0.37	-0.5	0.06	0.14	0.07	-1.71	0.34	-1.38	0.04
YDL242W	YDL242W										-0.47	-0.28		0.7
YDL243C	AAD4	-0.05	-0.1	-0.24	0.45	-0.11	0.16	-0.47	0.17	0.12	0.06	0.04	0.02	0.55
YDL244W	THI13						-2.8	0.18			-0.42	0.09	0.26	0.56
YDL245C	HXT15										-0.25	-0.83		-0.06
YDL246C	SOR2										0.04	0.22		0.02
YDL247W	MPH2		-0.07	-0.11	-0.06	0.43	-0.12	0.88	-0.12	0.08	0.1	0.64	-0.16	0.54
YDL247W-A	YDL247W-A	-0.13	-1.19	-1.21	-1.56	-0.98	-1.66	-0.28	-1.36	-0.92	-0.11	0.71	-0.76	0.04
YDL248W	COS7	-0.28	-0.09	-0.73	0.2	0.7	-0.63	0.18	-0.08	0.09	-0.39	0.3	0.16	-0.3
YDR001C	NTH1	-0.2	0.13	0.44	0.38	0.44	0.25	-0.3	-0.13	0.74	0.21	-0.01	0.49	0.12
YDR002W	YRB1	-0.02	-0.24	0.13	0.12	-0.12	0.2	0.13	-0.06	0.14	-0.14	-0.05	-0.09	0.58
YDR003W	RCR2	-0.14	-0.3	-0.29	0.39	0.17	0.22	-0.33	-0.03	-0.2	1.25	-0.32	0.2	0.25
YDR004W	RAD57	-0.01	-0.17	0.13	-0.13	0.07	0.16	0.23	0.07	-0.05	0.25	-0.43	-0.16	-0.2
YDR005C	MAF1	-0.23	-0.11	-0.25	0.15	-0.48	-0.1	-0.48	-0.17	0.24	-0.31	-0.54	-0.39	-0.18
YDR006C	SOK1	-0.15	0.12	0.15	0.17	-0.09	0.11	-0.09	0.07	0.41	0.25	0.13	0.23	0.31
YDR007W	TRP1	0.02	-0.12	0.08	0.6		0.46	0.32	0.4	0.1	0.69	-0.03	0.49	0.03
YDR008C	YDR008C						-0.39					-0.67		-0.17
YDR009W	GAL3			0.01	-0.13	-0.07				0.19	-0.43	0.48	0.33	-0.05
YDR010C	YDR010C	-0.33		-0.31	1.2	-0.13	0.08	0.07	0.48	0.66	0.17	-0.36	0.46	0.57
YDR011W	SNQ2	-0.17	-0.13	-0.22	0.25	0.26	-0.18	-0.05	0.04	-0.3	0.07	0.76	-0.04	-0.37
YDR012W	RPL4B	0.03	0.22	0.02	0.3	0.08	0.09	0.12	0.06	-0.1	-0.79	0.17	0.19	0.31
YDR013W	PSF1	-0.04	-0.13	-0.22	-0.16	-0.48	0.08	-0.14	0.03	-0.41	-0.55	-0.55	-0.47	-0.17
YDR014W	RAD61	-0.11	0.31	0.33	0.22	0.09	0.19	0.03	0.35	0.34	-0.42	0.01	-0.11	-0.3
YDR015C	YDR015C				-0.44		-0.04		0.13		0.27
YDR016C	DAD1	-0.52	-0.15	0.02	0	0.05	0.08	-0.1	0.17	-0.33	0.81	-0.21	-0.38	-0.11
YDR017C	KCS1	0.08	-0.01	0.01	0.03	-0.11	-0.15	0.05	-0.01	0.12	-0.34	-0.27	-0.38	-0.46
YDR018C	YDR018C	-1.12			-0.24		0.06			0.45	0.64	0.27		0.98
YDR019C	GCV1	0.12	-0.26	-0.47	2.21	0.36	0.45	-0.34	0.92	0.65	-0.33	0.87	0.83	-0.49
YDR020C	YDR020C	-0.08	-0.01	-0.2	-0.37	-0.25	-0.08	-0.01	-0.11	-0.2	-0.2	0.01	0	-0.39
YDR021W	FAL1	0.29	0.37	0.4	0	-0.33	0.17	0.47	0.25	0.34	0.02	0.2	0.12	-0.2
YDR022C	CIS1	-0.07	-0.28	0.18	-0.04	0.6	0.03	0.07	0.06	0.31	-0.06	-0.53	-0.47	0.1
YDR023W	SES1	0.07	-0.11	0.06	-0.16	-0.18	-0.01	0.06	-0.02	0.26	-0.58	-0.03	-0.31	-0.2
YDR024W	FYV1
YDR025W	RPS11A	-0.1	-0.24	0.5	-0.67	-0.02	-0.14	-0.17	0.02	-0.47	-0.15	0.01	-0.18	0.02
YDR026C	YDR026C	-0.07	-0.09	0.03	-0.03	-0.13	-0.1	0.14	-0.25	0.24	-0.31	-0.09	-0.46	-0.51
YDR027C	VPS54	-0.12	-0.11	-0.08	-0.27	0.07	0.02	-0.08	0.01	0.01	-0.65	-0.1	-0.4	-0.67
YDR028C	REG1	-0.17	-0.03	0	-0.04	0	-0.06	-0.05	-0.35	0.23	-0.28	0.14	-0.3	-0.45
YDR029W	YDR029W								-0.45		-0.18	0.08	0.05	0.19
YDR030C	RAD28	0.19	0.14	0.45	0.28	-0.11	0.29	0.34	0.19	-0.16	0.47	0.2	0.4	0.22
YDR031W	YDR031W	0.02	-0.14	0.33	0.22	0.09	0.22	0.1	0.35	-0.3	-0.07	-0.34	0.8	0.19
YDR032C	PST2	-0.04	0.07	0.31	0.62	0.36	0.08	0.18	0.08	0.2	0.93	0.14	1.11	0.45
YDR033W	MRH1	-0.29	0.06	-0.01	-1.08	-0.06	-0.25	-0.08	-0.64	-0.6	0.33	-0.59	-0.21	0.71
YDR034C	LYS14	0.09	0.16	-0.08	0.46	0.03	0.06	-0.11	0.06	0.29	-0.37	0.11	-0.16	-0.12
YDR034C-A	YDR034C-A	0.19	-0.16	-0.39	0.16	0.38	-0.27	0.06	0.27	0.82		0.61	-0.02	-0.39
YDR034W-B	YDR034W-B	0.08	0.25	0.8	0.8		0.47	0.38		1.47	-0.19	1.36	1.32	0.39
YDR035W	ARO3	-0.01	-0.18	-0.4	0.57	-0.4	-0.19	-0.12	0.06	0.49	0.28	0.31	-0.78	-0.41
YDR036C	EHD3	-0.01	0.26	0.03	-0.92	0.33	-0.1	-0.27	0.23	-0.84	-0.37	0.04	0.12	-0.24
YDR037W	KRS1	-0.09	-0.12	-0.11	0.37	-0.26	-0.28	0.01	-0.41	0.57	-0.33	0.17	-0.54	-0.41
YDR038C	ENA5	0.08	0.11	-0.07	0.12	-0.09	-0.05	0.15	0.06	-0.16	0.17	0.36	0.15	-0.21
YDR039C	ENA2	0.11	0.07	0.11	1.34	0.99	0.08	-0.01	0.18	0.16	0.56	0.42	-1.03	-0.37
YDR040C	ENA1	-0.34	-0.29	-0.29	0.74	0.54	-0.32	-0.25	-0.32	-0.29	-0.09	-0.1	-1.14	-0.89
YDR041W	RSM10	0.09	-0.29	0.29	0.3	0.12	0.24	-0.14	0.35	-0.62	0.71	-0.34	0.24	-0.51
YDR042C	YDR042C	-0.06	-0.17	-0.07		0.04		-0.14		0.27	0.49	0.53	0.73	-0.23
YDR043C	NRG1	0.15	-0.43	-0.4	0.65	0.37	0.22	-0.41	-0.34	0.23	-0.19	0.28	0.15	0.58
YDR044W	HEM13	-0.11	-0.41	-0.85	-0.25	0.02	-0.09	-0.32	0.36	-0.43	-0.25	-0.09	-0.04	-0.46
YDR045C	RPC11	0.12	-0.23	-0.16	-0.08	-0.15	-0.11	0.03	0.2	0.11	-0.41	-0.19	-0.18	0.08
YDR046C	BAP3	-0.37	0.05	-0.22	0.01	0.31	-0.36	0.13	-0.29	-0.29	0.61	0.29	0.03	0.25
YDR047W	HEM12	0.1	-0.03	-0.17	-0.39	0.13	-0.03	0.07	0.06	-0.24	-0.13	-0.12	-0.13	-0.2
YDR048C	YDR048C										0.4	-1.28		-1.01
YDR049W	YDR049W	0.03	-0.14	0.1	0.07	-0.28	0.11	0.27	-0.27	0.17	0.27	0.12	-0.32	-0.4
YDR050C	TPI1	-0.05	0.32	0.11	0.55	0.19	-0.17	0.27	-0.07	0.55	-1.3	-0.24	0.1	0.61
YDR051C	YDR051C	0.15	-0.19	0.01	0.52	-0.16	0.23	0.37	0.01	-0.02	0.51	0.09	0.26	0.17
YDR052C	DBF4	0.2	0.12	0.1	0.03	-0.04	0.08	0.1	0.06	0.25	0	0	-0.13	0.08
YDR053W	YDR053W				-0.77						0.67	-0.71		0.26
YDR054C	CDC34	0.32	0.01	0.01	0.26	0.17	0.01	0.19	-0.01	0.46	-0.45	-0.05	-0.1	-0.06
YDR055W	PST1	-0.11	0.08	0.13	0.72	0.08	0.34	-0.33	-0.36	0.17	-0.27	0.09	0.81	1.23
YDR056C	YDR056C	0.1	-0.33	-0.24	0.55	-0.17	0.06	0.26	-0.03	-0.15	0.38	0.15	0.01	0.24
YDR057W	YOS9	0.08	-0.19	-0.07	0.22	0.13	0.14	0.16	0.07	0.1	-0.35	0.19	0.17	-0.35
YDR058C	TGL2	0.16	0.03	0.01	1.18	0.42	0.4	0.37	-0.18	-0.14	0.83	0.23	0.49	0.06
YDR059C	UBC5	0.16	0.17	0.32	1.25	0.62	0.21	0.03	0.3	0.1	0.22	-0.06	1.07	0.02
YDR060W	MAK21	0.14	0.16	0.11	-0.26	-0.63	-0.06	-0.08	-0.27	0.03	0.01	0.14	-0.38	-0.35
YDR061W	YDR061W	0.11	-0.05	-0.01	0.1	0.18	0.12	0.03	0.32	-0.24	0.08	0.14	0.07	0.07
YDR062W	LCB2	0.04	0.09	-0.17	-0.31	0.25	-0.14	0	-0.09	-0.03	-0.34	0.17	-0.22	0.13
YDR063W	YDR063W	-0.05	-0.26	-0.11	-0.23	-0.01	-0.07	-0.09	-0.08	-0.37	-0.7	-0.32	-0.15	0.26
YDR064W	RPS13	0.04	-0.1	-0.19	-0.13	0.06	-0.08	-0.06	0.06	-0.31	-0.23	-0.28	0.03	0.01
YDR065W	YDR065W	0.1	0.32	0.02	-0.3	-0.06	0.07	0.04	0.21	0.17	-0.29	0	0.18	-0.44
YDR066C	YDR066C	0.17	-0.09	-0.04	0.03	0.14	0.25	-0.13	0.21	0.31	0.46	-0.06	0.21	0.18
YDR067C	YDR067C	0.36	0.05	0.2	0.42	-0.04	0.16	-0.03	0.48	0.29	-0.24	-0.15	-0.04	0.23
YDR068W	DOS2	-0.05	0.06	0.17	0.63	-0.03	0.18	0.27	-0.2	0.3	-0.15	0.28	0.14	-0.03
YDR069C	DOA4	-0.07	0.28	0.2	-0.45	0.37	-0.1	0.22	0.15	0.09	-0.25	-0.14	0.2	-0.02
YDR070C	YDR070C	0.01	-0.33	0.16	-0.55	-0.22	-0.15	-0.13	0.02	-0.24	0.42	-0.19	-0.14	0.13
YDR071C	PAA1	0.2	-0.18	0.34	0.38	-0.06	0.3	0.19	0.07	-0.02	0.4	0.19	-0.01	0.3
YDR072C	IPT1	-0.1	-0.1	-0.65	-0.67	0	-0.18	0.28	0.18	-0.69	0.35	0.12	0.36	0.05
YDR073W	SNF11	0.06	-0.33	-0.4	-0.17	-0.17	0.05	-0.06	0.01	-0.09	0.45	-0.62	0.07	-0.28
YDR074W	TPS2	-0.06	0.01	0.25	0.1	0.48	0.36	-0.12	0.19	0.16	1.1	-0.14	0.59	0.27
YDR075W	PPH3	0.18	0.07	-0.03	0.02	-0.28	0.06	-0.07	0.03	-0.27	0.21	-0.02	0.08	-0.27
YDR076W	RAD55	0.43	0.21	0.26	0.25	-0.18	0.05	-0.14	-0.01	0.1	-0.63	-0.13	0.09	-0.26
YDR077W	SED1	0.13	0.33	0.38	0.53	0.49	0.34	0.52	0.51	0.88	0.53	0.44	1.63	1.12
YDR078C	SHU2	0.17	-0.53	-0.09	0.28	-0.03	0.28	0.26	0.41	-0.06	0.75	-0.12	-0.4	0.05
YDR079C-A	TFB5	0.23	-0.42	0.26	0.46	0.03	0.23	0.34	0.47	0.12	0.64	-0.15	0.11	0.36
YDR079W	PET100	0.02	-0.22	0.12	0.05	-0.22	-0.15	-0.07	0.35	-0.72	0.22	-0.47	0.28	0.13
YDR080W	VPS41	0.08	0.03	0.2	1.13	0.11	0.11	0.17	-0.07	0.13	-0.43	-0.22	-0.08	-0.82
YDR081C	PDC2	-0.19	-0.08	-0.18	-0.11	-0.3	-0.2	-0.16	-0.1	-0.18	-0.55	0.1	-0.41	-0.05
YDR082W	STN1	0.06	-0.06	0.03	0.24	-0.05	0	0.21	0.07	-0.01	0.12	-0.19	-0.08	-0.21
YDR083W	RRP8	-0.01	-0.16	-0.21	-0.45	-0.86	-0.21	-0.06	-0.52	-0.53	-0.47	0.08	-0.66	-0.66
YDR084C	YDR084C	-0.29	-0.08	-0.07	0.28	0.16	-0.03	0.23	0.12	-0.09	-0.06	0.05	-0.03	0.12
YDR085C	AFR1	-0.14	0.11	0.19	0.11	0.62	0.56	0.46	0.21	1.16	-0.64	-0.73	1.04	0.76
YDR086C	SSS1	0.17	-0.28	0.01	0.23	0.03	0.26	-0.01	0.43	0.17	-0.58	-0.22	-0.11	0.83
YDR087C	RRP1	0.08	-0.06	0.05	-0.24	-0.67	-0.01	0.17	0.07	-0.06	-0.13	0.21	-0.2	0.04
YDR088C	SLU7	0.13	-0.03	0.28	0.48	-0.07	-0.02	0.36	-0.14	-0.1	-0.03	0.35	-0.19	-0.41
YDR089W	YDR089W	-0.3	0.12	-0.33	-0.45	0.22	-0.05	0.03	-0.24	-0.33	-0.58	0	-0.28	-0.24
YDR090C	YDR090C	-0.33	-0.06	-0.42	0.3	-0.02	-0.34	-0.09	-0.06	-0.45	-0.6	-0.06	-0.2	-0.39
YDR091C	RLI1	-0.23	-0.02	-0.31	-0.77	-0.52	-0.33	-0.19	-0.2	-0.24	-0.53	-0.13	-0.15	-0.38
YDR092W	UBC13	-0.04	-0.1	0.14	0.41	0.02	0.07	0.18	0.15	0.03	0.26	0.06	0	0.3
YDR093W	DNF2	-0.23	0.12	-0.49	-0.24	0.12	-0.08	-0.27	-0.18	0.22	-0.99	-0.13	-0.22	-0.08
YDR094W	YDR094W	-0.2	-0.07	-0.44	-0.21	0.08	-0.08	-0.44	-0.18	0.17	0.09	-0.07	-0.3	0.49
YDR095C	YDR095C											-1.11		-0.14
YDR096W	GIS1	-0.07	0.35	-0.01	-0.16	0.57	0.52	-0.03	0.33	0.02	0.82	0.16	0.16	0.07
YDR097C	MSH6	-0.12	-0.08	-0.07	-0.31	-0.47	-0.12	-0.09	-0.29	-0.45	0.08	-0.21	-0.27	-0.51
YDR098C	GRX3	0.04	-0.39	-0.03	0.11	0.15	-0.11	0.07	0.05	0.34	-0.15	0.12	-0.32	-0.3
YDR099W	BMH2	-0.29	-0.31	0.07	0.08	0.06	-0.17	-0.09	-0.13	0.1	-0.37	-0.11	-0.37	-0.15
YDR100W	YDR100W	-0.19	0.08	-0.16	0.82	0.45	-0.14	0.12	0.05	-0.26	-0.06	-0.14	0.5	-0.12
YDR101C	ARX1	0.32	0.31	0.2	-0.49	-0.16	0.07	0.17	0.22	0.09	0.63	0.21	-0.03	-0.71
YDR102C	YDR102C										-2.01
YDR103W	STE5	-0.1	0.05	-0.15	-0.28	0.14	-0.09	0	-0.09	-0.03	-0.42	-0.02	0.06	-0.32
YDR104C	SPO71	0.05	-0.04	0.09	0.28	-0.02	-0.09	-0.07	0.05	-0.14	0.27	-0.02	0.18	-0.11
YDR105C	TMS1	0.07	0.1	-0.19	0.72	0.44	0.09	0.35	0.22	-0.04	0.2	0.23	0.19	0.13
YDR106W	ARP10	0.01		-0.41	-0.05		-0.18			-0.95	0.22			-0.34
YDR107C	YDR107C	-0.23	0.11	0.22	0.32	0.59	-0.19	0.14	-0.09	-0.51	-0.39	-0.34	0.39	0.19
YDR108W	GSG1	-0.05	0.05	-0.13	0.03	-0.1	-0.23	-0.08	0	-0.17	-0.27	-0.07	-0.15	0.06
YDR109C	YDR109C	0.2	0.23	0.14	0.09	0.5	0.19	0.2	0.07	0.24	0.23	0.31	0.03	-0.04
YDR110W	FOB1	0.13	-0.03	0.01	-0.05	-0.23	-0.11	0.11	-0.17	-0.17	-0.09	-0.13	-0.28	-0.8
YDR111C	YDR111C	0	-0.48	-0.74	-1.24	-0.31	-0.21	-0.38	-0.34	-1.29	0.46	-0.36	-1.4	-0.28
YDR112W	YDR112W										1.46	-0.45		-0.77
YDR113C	PDS1	-0.01	-0.04	-0.15	-0.28	-0.1	-0.23	-0.06	-0.47	-0.44	0.29	-0.3	-0.39	-0.05
YDR114C	YDR114C										0.22	0.91		0.7
YDR115W	YDR115W	0.05	-0.1	0.07	-0.12	0.07	0.06	0.01	0.4	-0.68	1.07	-0.09	0.48	-0.2
YDR116C	MRPL1	-0.02	-0.04	0.2	-0.53	-0.23	0.12	-0.15	0.33	-0.86	0.57	-0.16	0.43	-0.05
YDR117C	YDR117C	0.1	-0.26	-0.19	-0.05	0.06	0.01	0.07	0.05	-0.19	-0.04	0.22	-0.3	-0.43
YDR118W	APC4	0.06	-0.18	-0.1	-0.01	-0.03	0.11	-0.02	0.12	0.03	-0.42	-0.02	-0.06	0.1
YDR119W	YDR119W	0.11	0.33	0.07	0.46	0.11	-0.03	0.51	0.26	0.15	0.53	0.63	0.35	0.03
YDR120C	TRM1	0.12	0.05	-0.06	-0.48	-0.4	-0.24	-0.04	-0.05	-0.48	0.08	0.35	-0.41	-0.59
YDR121W	DPB4	0.19	-0.29	-0.15	0.27	-0.18	0.18	0.24	0.05	-0.13	0.26	0.26	-0.19	0.23
YDR122W	KIN1	-0.19	-0.16	0.05	-0.14	0.32	0.08	-0.13	-0.1	-0.03	-0.11	0.12	-0.16	0.4
YDR123C	INO2	0.29	-0.1	-0.07	-0.42	-0.42	-0.12	0.09	0.18	-0.1	0.23	-0.21	-0.08	-0.24
YDR124W	YDR124W	0.46	0.12	-0.27	-0.18	-0.58	-0.3	0.13	0.23	-0.87	0.16	-0.99	-0.07	-0.55
YDR125C	ECM18			0.31						0.12	0.04	0.04		-0.26
YDR126W	SWF1	-0.16	-0.23	-0.32	0.47	0.09	-0.03	0.01	0.14	0.23	-0.33	-0.54	-0.04	-0.06
YDR127W	ARO1	0.04	0.1	-0.09	-0.11	-0.19	0.01	-0.1	0.07	0.18	-0.12	0.68	-0.23	-0.09
YDR128W	YDR128W	0.07	0.18	0.29	-0.01	0.01	0.03	0.07	0.11	0.1	0.09	0.47	-0.27	-0.5
YDR129C	SAC6	-0.04	0.21	0.01	-0.17	-0.12	0.19	-0.26	-0.07	-0.04	0.06	0.51	0.25	0.1
YDR130C	FIN1	0.21	-0.04	0.16	0.26	-0.53	0.07	0.06	0.12	-0.05	0.2	-0.22	0.05	-0.16
YDR131C	YDR131C	-0.08	-0.08	-0.01	0.13	-0.03	0.02	0.1	0.13	0.3	-0.3	-0.06	0.03	0.1
YDR132C	YDR132C	-0.11	-0.31	-0.27	-0.04	-0.01	-0.22	-0.15	0.07	-0.2	-0.21	0.06	-0.66	-0.12
YDR133C	YDR133C	-0.6	-0.02	-0.42	0.27	-0.2	-0.57	-0.51	-0.64	0.28	0.43	-0.22	-0.13	0.38
YDR134C	YDR134C	-0.02	-0.02	0.02	0.81	0.08	0.11	-0.14	-0.17	0.6	-0.28	-0.35	0.4	0.71
YDR135C	YCF1	-0.07	0.04	0.14	-0.03	0.13	0.06	0.02	-0.15	-0.18	0.38	0.31	-0.3	-0.1
YDR136C	VPS61										-1.61
YDR137W	RGP1	0.15	-0.03	0.11	0.46	-0.15	0.2	0.21	-0.01	0.12	0.24	0.19	0.08	-0.18
YDR138W	HPR1	-0.02	-0.03	0.04	-0.06	-0.24	-0.16	-0.13	-0.17	-0.28	-0.17	0.28	-0.33	-0.38
YDR139C	RUB1	0	-0.43	0.02	0.09	-0.17	0.06	-0.02	0.18	-0.18	0.24	-0.37	-0.28	0.1
YDR140W	YDR140W	0.09	-0.17	-0.01	-0.08	0.05	-0.07	-0.06	0.04	-0.03	0.38	-0.03	0.2	-0.03
YDR141C	DOP1	-0.06	0.14	0.02	-0.04	0.11	-0.02	-0.22	0.06	-0.08	-0.29	0.18	0.02	-0.28
YDR142C	PEX7	0	-0.04	-0.24	-0.05	-0.18	-0.11	-0.22	0.04	-0.28	-0.24	-0.22	0.09	0.14
YDR143C	SAN1	-0.02	0.13	-0.24	-0.11	-0.12	0.02	-0.03	0.15	0.16	-0.24	0.31	-0.21	0.29
YDR144C	MKC7	-0.05	0.05	-0.1	-0.81	-0.12	-0.07	0	0.14	-0.22	-0.43	0.13	-0.1	0.07
YDR145W	TAF12	-0.07	-0.09	0.14	0.33	-0.07	-0.08	0.29	-0.45	-0.22	0.44	0.24	-0.4	-0.26
YDR146C	SWI5	-0.1	0.03	-0.11	-0.26	-0.19	-0.19	0.01	-0.24	-0.08	-0.58	0	-0.39	-0.07
YDR147W	EKI1	0.13	-0.33	-0.32	-0.27	-0.21	-0.08	-0.07	-0.08	-0.47	0.16	-0.3	-0.33	-0.33
YDR148C	KGD2	-0.04	0.06	-0.04	-0.13	0.02	0.07	-0.07	0.27	-0.48	0.76	0.12	0.31	0
YDR149C	YDR149C										0.71	-0.32	-0.17	0.65
YDR150W	NUM1	0.07	0.05	0.09	-0.79	0.12	-0.09	0.15	-0.09	-0.46	0.12	0.52	-0.23	0.33
YDR151C	CTH1	-0.08	-0.29	-0.16	0.06	0.21	0.2	-0.22	0.14	-0.31	-0.12	0.24	0.01	-0.05
YDR152W	GIR2	0.02	-0.12	0.06	0.08	-0.31	0.1	0.18	-0.13	-0.02	-0.3	0.12	-0.2	-0.21
YDR153C	ENT5	0.09	-0.09	-0.06	-0.15	-0.26	0.05	-0.06	-0.11	0.05	0.15	-0.05	-0.22	0.05
YDR154C	YDR154C	0.07	-0.07	0.29	0.2	0.8	0.09	0.47	0.24	0.06	0.81	-0.56	0.55	0.35
YDR155C	CPR1	0.21	0.07	0.48	0.12	0.73	0.21	0.67	0.38	0.11	0.63	-0.35	0.56	0.67
YDR156W	RPA14	0.01	0.08	-0.11	-0.17	-0.09	-0.08	-0.15	-0.04	-0.13	0.52	0.16	0.27	0.6
YDR157W	YDR157W		0.44	-0.23	-0.56	0.01		0.23	0.05	-0.53	0.79	-0.54	0.28	0.46
YDR158W	HOM2	0	0.18	-0.11	1.11	-0.03	0.03	-0.12	0.27	0.53	0.15	0.19	-0.29	-0.15
YDR159W	SAC3	-0.04	0.08	0.13	-0.05	-0.07	0.03	0.11	-0.12	-0.15	-0.14	-0.02	-0.18	-0.01
YDR160W	SSY1	-0.12	0.12	-0.21	-0.39	-0.04	-0.28	-0.27	-0.04	-0.01	-0.39	-0.38	-0.35	-0.35
YDR161W	YDR161W	-0.04	-0.15	-0.3	-0.33	-0.57	-0.06	0.07	-0.23	-0.26	0.03	0.27	-0.42	-0.43
YDR162C	NBP2	0.09	-0.04	0.1	0.42	0.03	0.13	0.34	0.06	0.36	0.23	0.13	-0.05	0.15
YDR163W	CWC15	0.06	0.05	0.23	0.67	0.07	0.19	0.31	-0.03	0.32	0.33	0.09	0.19	-0.12
YDR164C	SEC1	-0.07	-0.05	-0.04	-0.09	0.01	-0.04	0.09	-0.01	0.02	-0.25	0.27	-0.36	-0.37
YDR165W	TRM82	0.08	-0.12	-0.22	-0.67	-0.35	-0.07	-0.1	-0.01	-0.24	-0.3	0.11	-0.21	-0.61
YDR166C	SEC5	-0.11	0.02	0.03	0.11	-0.21	-0.07	-0.07	-0.23	-0.15	0.04	0.28	-0.46	-0.06
YDR167W	TAF10	-0.06	-0.04	0.07	0.59	-0.01	0.24	0.22	0.01	0.07	0.42	0.2	0.19	0.25
YDR168W	CDC37	-0.21	0.03	0.18	0.26	0.12	0.03	0.17	-0.16	0.46	0.15	0.08	-0.19	-0.62
YDR169C	STB3	-0.21	-0.11	-0.3	0.02	-0.06	-0.05	-0.31	-0.13	-0.1	-0.49	-0.01	-0.45	0.08
YDR170C	SEC7	-0.09	0.17	0.05	-0.48	0.14	-0.08	0.03	-0.31	-0.35	0.19	0.17	-0.42	0.14
YDR171W	HSP42	-0.72	-0.16	0.68	0.39	1.69	0.87	-0.06	-0.24	-0.17	1.39	-0.02	0.45	0.6
YDR172W	SUP35	-0.08	0.16	0.25	0.02	-0.18	0.05	0.21	-0.12	0.47	-0.09	0.34	-0.33	-0.2
YDR173C	ARG82	-0.14	-0.25	-0.25	-0.07	0.45	0	0.34	0.32	0.11	0.63	-0.13	-0.24	-0.12
YDR174W	HMO1	0.21	-0.11	-0.2	-0.74	-0.1	-0.1	-0.11	0.1	-0.38	0.22	-0.41	-0.37	-0.03
YDR175C	RSM24	0.13	-0.03	0.35	-0.41	-0.01	0.09	0.14	0.34	-0.69	0.58	-0.16	0.21	-0.3
YDR176W	NGG1	-0.04	0.15	0.27	0	-0.13	0.04	0.21	-0.42	-0.28	0.02	-0.06	-0.4	-0.14
YDR177W	UBC1	0.06	-0.41	0.18	0.07	-0.02	0.16	-0.03	0.09	-0.02	-0.23	0.01	-0.09	0.24
YDR178W	SDH4	-0.03	0.02	0.32	0.78	0.19	0.09	-0.01	0.5	-0.45	0.79	0.16	1.15	0.43
YDR179C	CSN9	0.26	0.29	0.56		0.4	0.1	0.41	0.27	0.31	-0.43	-0.3	0.48	-0.07
YDR179W-A	YDR179W-A	0.08	0.17	-0.02	-0.11	0.04	-0.1	0.11	0.08	0.49	-0.46	-0.23	-0.02	-0.14
YDR180W	SCC2	-0.06	0.04	-0.07	-0.57	0.03	-0.07	-0.08	-0.19	-0.15	-0.22	-0.27	-0.18	-0.22
YDR181C	SAS4	0.18	0.29	0.18	0.15	-0.18	0.33	0.23	0.13	0.28	0.19	0.11	0.16	0.38
YDR182W	CDC1	-0.09	-0.14	-0.29	-0.11	-0.09	-0.03	-0.13	-0.17	-0.27	0.28	0.21	-0.28	-0.3
YDR183W	PLP1	0.04	-0.19	0.15	0.41	-0.05	0.15	0	-0.08	0.04	0.09	-0.08	-0.11	0.07
YDR184C	ATC1	-0.01	-0.18	-0.04	-0.54	-0.49	-0.42	0.12	-0.06	0.13	0.2	-0.23	-0.04	-0.44
YDR185C	YDR185C	0.09	-0.4	-0.26	-0.13	-0.49	0.11	-0.19	0.42	-0.74	1.43	-0.33	0.48	0.35
YDR186C	YDR186C	0.13	0.05	-0.02	0.3	0.31	0.04	-0.04	-0.01	0.22	0.1	0.13	-0.17	-0.3
YDR187C	YDR187C							0.26			-0.31	-0.59		-0.99
YDR188W	CCT6	0.15	0.1	0.35	-0.49	0.22	0.17	0.2	0.26	0.03	0.05	0.14	-0.2	-0.14
YDR189W	SLY1	0.1	0.05	0	-0.41	0.23	-0.03	0.17	0.07	-0.07	-0.17	0.18	-0.33	-0.11
YDR190C	RVB1	-0.03	-0.1	0.03	-0.16	-0.29	-0.04	-0.06	-0.24	-0.01	-0.35	-0.01	-0.23	-0.16
YDR191W	HST4	0.26	0	0.1	0.16	-0.08	0.08	0.01	0.05	0.36	-0.32	-0.09	0.04	0.14
YDR192C	NUP42	-0.1	-0.05	-0.13	-0.49	0.05	-0.2	-0.13	-0.06	-0.25	-0.05	0.2	-0.25	-0.18
YDR193W	YDR193W										0.31	-0.22		-0.43
YDR194C	MSS116	0.16	0.07	0.26	-0.28	-0.2	0.2	0.04	0.4	-0.38	0.55	0.07	0.27	-0.73
YDR195W	REF2	0.08	-0.14	0.07	-0.15	-0.13	0.19	0.12	0.28	-0.08	0.18	0.52	0.11	0.1
YDR196C	YDR196C	0.15	-0.28	0.29	-0.17	0.04	0.14	0.18	0.15	-0.1	0.13	-0.27	0.35	0.15
YDR197W	CBS2	0.03	-0.08	0.08	-0.15	0.03	0.1	0.1	0.41	-0.27	0.21	0	0.31	0.22
YDR198C	YDR198C	0.17	0.02	0	-0.35	-0.26	0	-0.01	0.13	0.1	0.01	0.02	0.02	-0.37
YDR199W	YDR199W										-0.43	-0.63		-0.43
YDR200C	VPS64	-0.01	-0.07	0.15	0.13	0.14	-0.05	0.02	-0.02	-0.1	0.08	-0.1	-0.15	-0.21
YDR201W	SPC19	0.09	-0.3	0.03	0.07	-0.09	-0.04	-0.08	0.08	-0.29	0.24	-0.11	-0.1	0.08
YDR202C	RAV2	0.12	-0.23	0.05	0.44	0.07	0.14	0.3	0.14	-0.04	0.24	-0.22	0.14	0.03
YDR203W	YDR203W										-0.03	-1.77		0.15
YDR204W	COQ4	-0.17	-0.22	0	-0.12	0.28	-0.01	0.03	-0.02	-0.34	0.25	-0.39	0.23	0.33
YDR205W	MSC2	-0.07	-0.12	-0.17	0.41	0.11	-0.07	0.23	-0.07	-0.05	0.18	0.07	0.1	0.17
YDR206W	EBS1	0.11	0.09	0.13	-0.12	-0.31	-0.11	0.08	-0.03	0.18	-0.29	0.13	-0.27	-0.3
YDR207C	UME6	0.11	0.12	-0.25	-0.46	0.2	-0.19	-0.12	-0.27	-0.12	-0.34	-0.35	-0.31	-0.49
YDR208W	MSS4	-0.13	-0.05	-0.06	-0.07	-0.21	-0.07	-0.26	-0.13	-0.1	0.02	-0.07	-0.19	-0.01
YDR209C	YDR209C										-0.41	-0.86		0.05
YDR210W	YDR210W	0.02	-0.33	-0.22	-0.17	0.24	0.09	0.18	0.46	0.03	-0.47	-0.35	-0.46	0.26
YDR211W	GCD6	0.07	-0.14	0.07	-0.01	-0.32	-0.08	0.28	0	0.22	-0.35	0.1	-0.12	-0.32
YDR212W	TCP1	-0.07	0.05	0.26	-0.52	-0.17	0.01	0.13	0.03	-0.06	0.24	0.03	0.06	-0.12
YDR213W	UPC2	0.07	0.19	-0.38	0.12	-0.08	0.07	-0.26	-0.08	-0.31	-0.69	-0.06	-0.09	-0.15
YDR214W	AHA1	-0.2	0.11	0.69	-0.28	1.2	0.14	0.75	0.04	-0.11	-0.07	0.07	0.71	0.05
YDR215C	YDR215C									-0.03	0.01	0.3		0.55
YDR216W	ADR1	-0.28	0.08	0.58	1.08	1.29	0.6	-0.42	-0.25	1.76	-0.95	0.59	1.8	-0.24
YDR217C	RAD9	0.03	-0.02	0.12	0.08	-0.32	-0.13	0.02	-0.2	-0.06	-0.06	0.2	-0.42	-0.6
YDR218C	SPR28										-0.31	0.55		0.81
YDR219C	YDR219C	-0.07	-0.25	-0.15	0.39	2.34	0.17	-0.07	0.12	-0.05	0.52	0.1	-0.2	0.13
YDR220C	YDR220C										-3.5
YDR221W	YDR221W	0.06	0.06	0.02	0.06	-0.04	-0.05	-0.16	-0.1	-0.12	-0.45	0.4	0	-0.37
YDR222W	YDR222W	-0.1	0.72	0.75	-0.35	0.98	0.54	1.2	-0.09	-0.15	-0.89	-0.14	-0.02	1.16
YDR223W	CRF1										0.2	-0.15		-0.18
YDR224C	HTB1	0.07	-0.15	-0.48	0.17	-0.48	0.15	-0.35	-0.11	-0.65	0.56	0.26	-0.44	0.29
YDR225W	HTA1	0	0.03	-0.08	0.06	-0.64	0.11	-0.26	-0.23	-0.85	1.52	-0.15	-0.11	0.25
YDR226W	ADK1	0.02	-0.32	-0.18	-0.3	-0.1	-0.04	-0.21	0.09	-0.34	-0.8	-0.27	-0.45	0.24
YDR227W	SIR4	0.07	-0.08	0.01	0.09	-0.38	0.03	0.21	-0.15	-0.21	-0.44	-0.06	-0.44	-0.13
YDR228C	PCF11	0.04	-0.23	0.1	-0.27	-0.1	-0.04	0.13	0	-0.32	-0.34	0.13	-0.14	0.06
YDR229W	IVY1	-0.03	-0.14	-0.02	-0.24	-0.23	0.06	0.11	-0.23	-0.21	0.12	0.06	-0.1	-0.35
YDR230W	YDR230W	0.01			-0.13		0				0.18	-0.23	0.09	-0.53
YDR231C	COX20	-0.02	-0.39	-0.19	0.13	-0.1	0.03	-0.31	0.42	-0.91	0.67	0.18	0.35	-0.54
YDR232W	HEM1	-0.09	-0.14	-0.39	0.17	-0.33	-0.32	-0.42	-0.01	-0.43	-0.23	0.15	0.14	-0.26
YDR233C	RTN1	-0.09	-0.18	-0.28	-0.09	-0.14	-0.19	-0.13	-0.19	-0.1	-0.93	-0.05	-0.05	0.38
YDR234W	LYS4	-0.09	0.42	-0.11	0.78	0.26	0.54	0	0.63	0.62	0.03	0.32	0.66	0.26
YDR235W	PRP42	0.02	-0.02	-0.2	-0.18	-0.23	-0.07	0.01	0	-0.27	-0.51	-0.26	-0.15	-0.15
YDR236C	FMN1	-0.25	-0.16	-0.06	-0.25	-0.09	-0.19	-0.15	-0.3	-0.3	0.41	0.14	-0.21	-0.27
YDR237W	MRPL7	0.06	0.01	0.25	-0.54	-0.12	0	-0.08	0.43	-0.92	0.63	-0.02	0.24	-0.45
YDR238C	SEC26	0.08	0.02	0.13	-0.22	0.07	0.08	0.07	0.11	0.1	-0.14	0.1	-0.33	0.1
YDR239C	YDR239C	0.12	-0.11	-0.12	-0.34	0.11	-0.09	-0.03	-0.1	-0.34	0.21	0.28	-0.37	0.1
YDR240C	SNU56	0.09	-0.08	-0.09	-0.23	-0.25	-0.02	0.08	-0.03	-0.36	0.03	-0.12	-0.12	-0.02
YDR241W	BUD26
YDR242W	AMD2	-0.01	0.32	0.34	2.13	-0.11	0.13	0.07	-0.14	0.78	-0.52	-0.22	-0.19	-0.16
YDR243C	PRP28	0.09	0.26	0.24	-0.09	-0.4	-0.04	-0.19	0.02	0.06	-0.07	0.01	-0.17	-0.32
YDR244W	PEX5	0.07	-0.08	0.1	0.69	-0.16	0.14	0.23	0.16	-0.01	-0.06	0.16	-0.18	-0.27
YDR245W	MNN10	-0.05	-0.17	-0.21	-0.06	-0.43	-0.05	-0.11	-0.21	-0.18	-0.02	0.06	-0.28	0.04
YDR246W	TRS23	-0.02	-0.16	0.07	-0.09	-0.05	0.1	0.16	-0.11	-0.09	-0.43	-0.03	0.25	0.33
YDR247W	VHS1			0.02	0.15				-0.12	-0.31	-1.27	-0.44	-0.13	-0.29
YDR248C	YDR248C	-0.19	-0.21	0.34	0.08	0.26	-0.04	-0.07	0.21	-0.02	-0.58	-0.11	0.03	-0.03
YDR249C	YDR249C	-0.29	-0.02	-0.34	0.15	0.08	-0.16	-0.12	0.01	0.27	-0.47	-0.25	0.15	-0.15
YDR250C	YDR250C										0.17	-1.05		-0.02
YDR251W	PAM1	-0.24	0.06	-0.05	-0.29	0.35	-0.08	-0.08	-0.06	0.02	-0.06	0.15	-0.1	0.53
YDR252W	BTT1	-0.25				-0.01	-0.19			-0.08	0.09	0.41		0.3
YDR253C	MET32		-1.52	-1.03	0.14	-0.68					0.74	-0.75	-1.05	-0.79
YDR254W	CHL4	-0.1	-0.27	-0.14	-0.17	0.09	-0.13	-0.12	-0.07	-0.09	-0.09	-0.03	-0.25	-0.29
YDR255C	RMD5	-0.42	-0.16	0.44	-0.02	0.18		-0.2		-0.02	-0.4	-0.45	0.37	0.32
YDR256C	CTA1	-0.36	0.43	-0.06	-0.1	-0.36		0.1		-0.3	0.68	0.11	-0.68	0.12
YDR257C	SET7	-0.26	-0.03	0.02	-0.07	-0.33	-0.14	-0.03	-0.31	0.21	-0.05	-0.05	-0.18	-0.74
YDR258C	HSP78	-0.49	0	1.04	1.66	1.68	0.34	0.35	0.47	-0.28	0.12	0.23	1.2	-0.04
YDR259C	YAP6	-0.1			-0.3	0.6	0.02		0.13	1.28	-0.34	-0.32	1.06	0.11
YDR260C	SWM1	-0.08	-0.02	-0.25	0.14	-0.08	0.04	0.04	0.21	-0.18	0.08	0.14	-0.25	-0.11
YDR261C	EXG2	-0.06	0.01	-0.02	-0.67	0.44	0.16	0.24	0.09	0.43	0.02	-0.36	0.36	0.34
YDR262W	YDR262W	0.09	0	-0.57	0.54	-0.19	-0.15	-0.26	0.02	0.25	0.46	0.14	0.46	0.37
YDR263C	DIN7	-0.12	-0.3	-0.07	-0.08	0.16	0	-0.01	-0.09	-0.36	-0.63	-0.17	-0.39	-0.4
YDR264C	AKR1	-0.36	-0.25	-0.35	0.41	0.21	-0.22	-0.43	-0.12	-0.07	-0.69	0.64	-0.33	-0.3
YDR265W	PEX10	-0.06	-0.09	0.16	-0.06	0	0.04	-0.22	0.15	-0.25	-0.1	-0.19	-0.17	-0.32
YDR266C	YDR266C	-0.02	0.02	0.08	-0.4	-0.01	-0.01	0.06	-0.04	0.27	-0.17	-0.01	-0.45	-0.36
YDR267C	YDR267C	0.09	-0.13	-0.18	0.01	-0.31	-0.12	-0.19	-0.01	-0.15	-0.01	-0.02	-0.12	-0.1
YDR268W	MSW1	0.03	-0.31	0.08	-0.41	0.01	0	-0.25	0.23	-0.3	-0.29	-0.18	-0.07	0.16
YDR269C	YDR269C										0.58	1.21		-0.94
YDR270W	CCC2	-0.7	-0.38	-0.34	0.11	0.13	-0.05	-0.95	0.04	-0.36	-0.71	0.14	-0.32	0.09
YDR271C	YDR271C										-1.75	-0.22		-0.03
YDR272W	GLO2	-0.02	-0.21	0.1	0.38	-0.06	0.04	-0.09	-0.31	-0.21	0.44	0.06	0.17	-0.26
YDR273W	DON1	0.03	-0.12	0.08	0.21	0.16	0.17	0.37	-0.11	-0.33	0.49	0.25	-0.58	0.16
YDR274C	YDR274C										-0.48	-0.46		-0.89
YDR275W	BSC2	0.35	-0.02	0.01	0.2	0.15	0.27	0.15	-0.3	-0.18	0.31	-0.08	-0.19	-0.55
YDR276C	PMP3	0.15	0.09	0.32	0.36	0.31	0.27	-0.01	0.33	-0.15	0.4	-0.48	0.21	0.49
YDR277C	MTH1		0.26	-0.6	-0.34	-1.03	-0.04	0.1		-1.07	0.72	0.37	0.97	0.1
YDR278C	YDR278C											-0.08		0.55
YDR279W	RNH202	0.01	-0.25	-0.24	-0.3	-0.26	-0.12	-0.21	-0.17	-0.24	-0.16	-0.09	-0.34	-0.41
YDR280W	RRP45	-0.04	-0.31	-0.19	-0.38	-0.48	-0.12	-0.2	-0.05	-0.14	0.22	-0.13	-0.44	-0.31
YDR281C	PHM6	0.21	0.08	-0.44	-0.7	-0.57	-0.47	-2.39	-0.69	-0.98	-2.28	-2.93	-3.33	-2.7
YDR282C	YDR282C	-0.15	-0.25	0.06	-0.14	-0.16	-0.16	-0.2	0.12	-0.36	0.09	-0.08	0.18	-0.46
YDR283C	GCN2	-0.03	-0.07	-0.04	-0.06	-0.15	-0.09	-0.11	0.02	-0.03	-0.26	0.13	-0.23	-0.09
YDR284C	DPP1	-0.14	-0.47	-0.53	0.33	0.09	-0.05	0.19	-0.14	-0.03	-0.41	-0.3	-0.52	-0.1
YDR285W	ZIP1		-0.02	0.23	0.35	-0.24	0.21	0.28	-0.18	0.17	-0.43	0.15	-0.27	-0.02
YDR286C	YDR286C	0.3	-0.25	0.4	0.1	0.18	0.17	0.45	0.54	-0.36	0.02	-0.35	0.53	0.08
YDR287W	YDR287W	0.02	0.06	0.12	0.24	-0.05	-0.03	-0.39	-0.12	0.13	0	0.04	0.34	0.36
YDR288W	NSE3	0.09	-0.29	-0.06	0.21	-0.45	0.06	-0.04	0.01	-0.3	0.2	-0.22	-0.09	0.08
YDR289C	RTT103	0.15	0.12	0.07	0.23	-0.04	0.26	0.38	0.02	0.49	-0.78	0.27	0.15	-0.24
YDR290W	YDR290W										-0.02	-0.26		-1.36
YDR291W	YDR291W	0.02	0.06	0.11	-0.2	-0.05	-0.06	0.07	0.03	0.11	-0.07	0.17	-0.07	-0.38
YDR292C	SRP101	-0.14	-0.1	-0.2	-0.07	-0.21	-0.08	-0.11	-0.22	-0.23	-0.4	0.27	-0.44	-0.62
YDR293C	SSD1	-0.12	0.16	0.01	-0.03	0.03	-0.05	0.06	-0.08	0.21	-0.67	0.17	0.31	-0.06
YDR294C	DPL1	-0.01	-0.09	0.15	0.07	0.07	0.02	0.17	-0.01	0.33	-0.07	0.33	0.25	0.53
YDR295C	HDA2	-0.11	-0.21	0.04	0.05	-0.05	-0.03	0.08	-0.12	-0.05	-0.08	-0.06	-0.33	0
YDR296W	MHR1	0.17	-0.01	0.46	-0.04	-0.16	0.38	0.15	0.36	-0.59	0.83	0.07	0.49	-0.25
YDR297W	SUR2	-0.25	-0.26	-0.66	-0.66	-0.24	-0.25	-0.55	-0.16	0.19	-0.09	-0.04	-0.21	-0.2
YDR298C	ATP5	0.02	0.04	-0.12	0.28	0.05	0.08	-0.1	0.51	-0.86	0.08	0.02	0.79	0.02
YDR299W	BFR2	0.15	0.1	0.29	-0.09	-0.47	0.07	0.32	-0.14	0.27	0.48	0.37	-0.15	-0.16
YDR300C	PRO1	0.02	-0.15	-0.31	-0.34	-0.5	-0.11	0.04	-0.1	-0.07	-0.24	-0.25	-0.49	-0.14
YDR301W	CFT1	-0.11	-0.08	-0.12	-0.16	-0.21	-0.21	-0.21	-0.09	-0.31	0.05	0.06	-0.45	-0.16
YDR302W	GPI11	-0.02	0.06	-0.26	-0.12	0.14	0.08	0.07	0.21	-0.15	-0.49	-0.18	0.09	-0.16
YDR303C	RSC3	-0.15	-0.12	-0.18	-0.44	0.05	-0.22	-0.37	-0.25	-0.18	-0.39	-0.3	-0.68	-0.37
YDR304C	CPR5	0.16	-0.16	0.12	0.13	0.17	0.04	0.24	0.11	0	0.72	0.12	0.13	0.33
YDR305C	HNT2	-0.02	-0.56	-0.21	0.01	-0.29	-0.08	-0.23	0.03	-0.28	0.18	-0.04	-0.16	0.02
YDR306C	YDR306C	-0.06	0.04	-0.13	0.23	-0.04	0.02	0.16	0.01	-0.1	0.26	0.07	0	-0.22
YDR307W	YDR307W	-0.17	-0.17	-0.37	-0.03	-0.05	-0.21	0	-0.44	-0.33	-0.16	0.14	-0.2	-0.24
YDR308C	SRB7	0.11	-0.1	0.19	0.19	-0.45	0.05	0.01	-0.01	-0.38	-0.53	0.15	0.03	-0.1
YDR309C	GIC2	0.01	-0.04	-0.59	0.36	-0.17	0.03	-0.19	-0.14	-0.02	-0.42	0.26	0.41	0.56
YDR310C	SUM1	-0.18	-0.09	-0.02	-0.55	-0.1	-0.29	-0.06	-0.18	-0.16	-0.2	-0.23	-0.47	-0.19
YDR311W	TFB1	0.16	0.17	0.14	0.14	-0.06	0.05	0.14	0.05	0.42	0.46	-0.43	-0.07	-0.36
YDR312W	SSF2	0.18	0.27	0.43	0.22	-0.18	0.21	0.27	0.01	-0.03	-0.07	0.24	-0.11	-0.49
YDR313C	PIB1	-0.02	0.13	-0.12	-0.2	-0.18	0.2	-0.19	-0.03	-0.41	0.76	-0.03	0.34	-0.11
YDR314C	YDR314C	-0.29	0.04	0.86	0.13	-0.76	-0.29	-0.55	-0.21	0.24	0.37	-0.4	-0.48	-0.7
YDR315C	IPK1	0.17	-0.13	0.32	0.23	-0.11	0.29	0.19	0.21	0.8	-0.2	-0.2	0.37	-0.04
YDR316W	OMS1	0.07	0.03	0.43	-0.12	-0.31	0.28	0.18	0.15	0.01	0.81	-0.14	0.39	-0.59
YDR317W	HIM1			0.03		-0.01	-0.07			0.79	0.19	-0.04		0.47
YDR318W	MCM21	0.17	-0.2	-0.08	-0.15	-0.34	-0.17	0	-0.14	0.19	0.39	-0.43	0.05	-0.2
YDR319C	YDR319C	-0.29	-0.07	-0.41	0.47	-0.07	-0.24	-0.19	-0.11	-0.06	-0.01	-0.18	0.28	0.02
YDR320C	SWA2	-0.13	-0.09	-0.12	-0.27	0.22	-0.37	-0.07	0.05	-0.02	-0.29	0.34	-0.33	-0.39
YDR320C-A	DAD4	0.03	-0.05	-0.05	0.57	0.05	0.03	-0.16	0.28	-0.01	0.25	-0.47	0.33	0.32
YDR321W	ASP1	-0.04	-0.15	-0.37	-0.19	0.07	-0.19	0.09	0	-0.2	0.05	0.06	-0.08	0.18
YDR322C-A	TIM11	-0.11	-0.14	-0.11	-0.08	-0.24	-0.2	-0.2	0.36	-0.5	0.17	-0.43	0.29	0.09
YDR322W	MRPL35	0.01	0	0.15	-0.36	-0.17	0.08	-0.06	0.44	-0.5	0.03	0.1	0.07	-0.65
YDR323C	PEP7	0.03	-0.15	-0.15	-0.04	-0.37	0.08	-0.08	-0.04	-0.35	-0.46	-0.27	-0.11	-0.2
YDR324C	UTP4	0.15	0.05	0.05	-0.49	-0.56	-0.14	0.02	-0.13	-0.09	-0.24	0.17	-0.33	-0.49
YDR325W	YCG1	0.08	0.1	0.3	0.12	-0.06	0.01	0.08	-0.09	0.24	-0.13	0.16	-0.07	-0.23
YDR326C	YDR326C	0.03	-0.01	-0.2	-0.27	-0.04	-0.15	-0.17	-0.17	-0.36	0.04	0.1	-0.46	0.14
YDR327W	YDR327W			-0.01	0.38			0.13		-0.35	-0.69	-0.16	-0.09	0.44
YDR328C	SKP1	0.04	-0.28	0.1	0.02	-0.12	0.08	0.1	-0.04	-0.29	-0.21	0.05	-0.28	0.17
YDR329C	PEX3	0.01	-0.32	-0.08	0.2	-0.19	0.03	0.03	-0.15	-0.57	0.21	0.03	-0.22	-0.14
YDR330W	UBX5	0	0.1	0.15	-0.1	0.23	0.05	0.14	0.13	0	0.61	-0.11	0.04	-0.17
YDR331W	GPI8	-0.09	0.07	-0.09	-0.24	-0.4	-0.05	-0.16	-0.19	-0.06	-0.39	0.19	-0.2	0.32
YDR332W	YDR332W	0.04	-0.18	-0.06	-0.43	0.01	-0.01	0.02	0.21	0.12	-0.24	-0.39	-0.49	-0.46
YDR333C	YDR333C	-0.01	-0.1	-0.14	-0.19	-0.12	-0.08	-0.07	-0.05	-0.07	-0.33	0	-0.24	-0.38
YDR334W	SWR1	-0.02	0.16	0.28	-0.23	-0.15	0.09	0.1	-0.09	0.03	0.23	-0.13	-0.24	0.02
YDR335W	MSN5	0.02	0.05	0.28	-0.12	0.39	0.06	0.06	0.04	0.3	-0.52	-0.06	-0.05	-0.42
YDR336W	YDR336W	0.06	-0.25	-0.29	-0.27	-0.43	0.08	0.09	-0.06	-0.29	-0.33	-0.33	-0.22	-0.22
YDR337W	MRPS28	0.15	0.04	0.34	-0.16	-0.08	0.25	0.03	0.42	-0.74	1.06	-0.18	0.51	-0.08
YDR338C	YDR338C	-0.05	0.01	-0.37	0.24	-0.07	-0.14	-0.18	-0.12	-0.15	-0.19	-0.21	-0.15	0.09
YDR339C	YDR339C	0.27	-0.16	0.24	0.36	-0.53	0.22	0.07	0.06	0.1	-0.2	-0.03	-0.15	0.33
YDR340W	YDR340W										-1.95
YDR341C	YDR341C	-0.01	-0.16	-0.25	0.21	-0.19	-0.1	-0.14	0.11	0.15	-0.77	0.14	-0.48	-0.49
YDR342C	HXT7	0.12	4	3.27	2.25	-0.56	3.79	3.66	3.4	2.65	1.52	1.5	5.68	0.12
YDR343C	HXT6	0.08	4.14	3.19	2.57	-0.56	3.63	3.68	3.5	2.72	1.97	1.4	5.66	0.13
YDR344C	YDR344C													-2.04
YDR345C	HXT3	-0.22	-0.03	-0.24	0.42	-0.25	-0.12	-0.39	-0.12	0.22	-0.85	-0.36	-0.29	0.82
YDR346C	SVF1	0.14	0.02	0.14	-0.06	-0.24	0.17	0.04	0.13	-0.04	-0.21	0.27	-0.23	-0.45
YDR347W	MRP1	0.19	0.21	0.28	-0.24	0.17	0.22	-0.04	0.55	-0.72	1.12	0.16	0.38	-0.39
YDR348C	YDR348C	0.03	0.08	0.02	-0.56	0.06	-0.15	-0.03	-0.11	-0.25	-0.07	-0.04	-0.39	0.12
YDR349C	YPS7	-0.21	0.04	0.02	0.38	0.12	-0.11	0.01	0.07	0.62	-0.16	0.03	0.32	0.12
YDR350C	TCM10	-0.1	0.09	0.01	0.06	0.13	0.07	-0.1	0.17	0.57	-0.39	-0.25	0.32	-0.19
YDR351W	SBE2	0.12	0.28	0.32	0.39	0.09	0.26	0.3	0.16	0.8	-0.11	0.08	0.28	0.2
YDR352W	YDR352W	-0.09	0.04	-0.42	0.41	-0.26	-0.16	-0.16	-0.19	-0.14	0.11	-0.1	-0.31	-0.09
YDR353W	TRR1	-0.05	0.02	-0.13	-0.68	-0.04	-0.01	-0.21	-0.1	-0.68	0.25	-0.08	-0.19	0.07
YDR354W	TRP4	-0.03	0.03	-0.16	0.98	-0.07	-0.19	0.05	0.08	0.38	-0.51	0.08	-0.33	0
YDR355C	YDR355C										-0.24	-0.4		0.29
YDR356W	SPC110	0.05	0.05	-0.05	-0.03	-0.3	-0.03	-0.01	-0.55	-0.3	-0.23	0.03	-0.4	-0.25
YDR357C	YDR357C	0.13	-0.6	0.08	0.03	0.19	0.05	0.04	0.06	0.03	-0.14	-0.34	0.05	0.18
YDR358W	GGA1	-0.04	-0.02	0.49	0.88	0.37	0.39	0.08	0.22	0.04	-0.03	0.19	0.43	0.16
YDR359C	VID21	0	0.05	0.09	-0.01	-0.06	0.02	-0.06	0	-0.05	-0.66	0.01	-0.44	-0.2
YDR360W	YDR360W										0.23	-0.09		0.59
YDR361C	BCP1	0.02	-0.4	-0.2	-0.18	-0.8	-0.11	0.01	-0.07	-0.55	-0.39	0.06	-0.4	-0.37
YDR362C	TFC6	0.05	-0.04	0.12	-0.18	0.02	-0.03	0.05	-0.01	-0.05	0.33	0.19	-0.17	-0.02
YDR363W	ESC2	-0.08	0.13	0.17	-0.21	-0.4	-0.09	-0.12	-0.38	0.13	-0.2	0.52	-0.09	-0.52
YDR363W-A	SEM1	-0.18	-0.32	0.32	0.34	-0.37	0.13	0.04	0.01	-0.03	-1.08	-0.2	-0.07	0.03
YDR364C	CDC40	0.04	0	0.13	-0.52	-0.34	0.01	0.12	-0.06	0.05	0.08	-0.1	-0.1	-0.25
YDR365C	ESF1	-0.37	0.1	0.18	-0.69	-0.75	-0.22	0.08	-0.47	-0.17	0.31	0.62	-0.87	-0.34
YDR366C	YDR366C	-0.08	-0.01	-0.02	-0.17	-0.29	-0.06	0.13	-0.14	0.33	0.45	0.52	-0.08	-0.79
YDR367W	YDR367W	0.09	-0.12	-0.35	0.04	-0.1	-0.2	0.01	0.12	-0.28	0.23	-0.44	-0.12	0.15
YDR368W	YPR1	0.15	0.35	0.22	-0.42	0.56	0.19	0.31	-0.02	0.46	0.01	-0.44	0.05	0.25
YDR369C	XRS2	0.03	-0.13	0.22	0.09	0.16	0.17	-0.03	0.14	0.59	-0.26	-0.12	-0.28	-0.34
YDR370C	YDR370C	0.3	-0.04	0.27	0.14	-0.09	0.37	0.2	0.49	0.01	0.47	0.18	0.18	-0.01
YDR371W	CTS2	-0.02	-0.31	0.04	0.34	-0.15	0.21	-0.01	0.18	0.28	-0.16	0.48	-0.11	-0.18
YDR372C	VPS74	0.11	-0.29	-0.12	0.15	-0.13	0.03	-0.06	-0.04	-0.01	0.25	0.05	-0.41	-0.25
YDR373W	FRQ1	-0.13	-0.41	-0.03	0.06	0.02	-0.04	-0.29	0.04	-0.03	-0.48	-0.25	-0.15	-0.51
YDR374C	YDR374C										1.14	-0.33		0.74
YDR375C	BCS1	0.23	0.15	0.33	-0.59	-0.01	0.14	-0.02	0.61	-0.47	0.73	0.27	0.24	-0.42
YDR376W	ARH1	0.16	-0.18	0.05	-0.48	0.15	0.11	-0.06	0.28	-0.32	0.52	0.14	0.15	-0.27
YDR377W	ATP17	0.04	0.02	-0.15	0.28	0.04	0.2	-0.16	0.49	-0.88	0.47	-0.33	0.68	0.23
YDR378C	LSM6	0.09	-0.4	-0.09	0.24	-0.21	0.01	-0.11	0.16	-0.23	0.44	-0.24	-0.23	0.17
YDR379C-A	YDR379C-A	-0.07	0.03	0.84	0.86	0.55	0.13	-0.11	0.55	0.96	0.8	0.07	1.44	0.82
YDR379W	RGA2	0.24	0.08	0.42	0.25	-0.14	0.14	0.23	-0.07	0.18	0.07	0.24	-0.05	-0.11
YDR380W	ARO10										-0.89	1.07		2.54
YDR381C-A	YDR381C-A								0.08
YDR381W	YRA1	-0.02	-0.21	-0.04	0.07	-0.47	0.03	-0.02	-0.14	0.02	0.08	-0.3	-0.38	-0.33
YDR382W	RPP2B	0.06	-0.16	-0.04	0.01	-0.07	-0.02	-0.12	0.09	-0.24	-0.35	-0.19	-0.02	0.22
YDR383C	NKP1	0.14	-0.11	0.1	0.85	-0.62	0.21	-0.06	-0.21	0.11	0.42	-0.16	-0.26	0.14
YDR384C	ATO3	-0.32	0.1	-0.86	1.03	0.11	-0.2	0.5	-0.25	-0.23	0.02	0.75	0.37	-0.86
YDR385W	EFT2	-0.02	-0.06	-0.24	0.27	-0.16	-0.07	-0.17	-0.02	0.02	-0.66	0.05	0.33	0.08
YDR386W	MUS81	-0.02	-0.19	0.19	0.29	-0.13	0.01	0.24	-0.21	0.27	-0.22	0	-0.29	-0.01
YDR387C	YDR387C	-0.31	-0.08	-0.13	0.32	-0.05	-0.18	-0.14	-0.1	-0.21	0.34	-0.29	0.17	0.12
YDR388W	RVS167	0.03	0.24	0.05	-0.16	0.28	0.08	0.28	-0.19	0.16	-0.14	0.33	0.34	1.05
YDR389W	SAC7	0.05	0.14	0.1	-1.31	-0.22	-0.22	0.01	-0.3	0.04	-0.72	0.03	-0.17	-0.04
YDR390C	UBA2	0.03	-0.18	-0.02	0.08	-0.36	-0.06	0.01	0.04	-0.04	-0.27	0.04	-0.22	-0.05
YDR391C	YDR391C	-0.05	-0.15	0.04	0.14	0.31	-0.04	0.1	0.09	0	0.96	0.34	0.4	0.3
YDR392W	SPT3	0.09	0	0.07	0.53	-0.02	0.2	0.34	0.01	0.01	-0.06	0.12	0.17	-0.28
YDR393W	SHE9	0.1	0.01	0.19	0.56	-0.26	0.23	-0.07	0.03	-0.22	0.38	-0.47	-0.07	-0.51
YDR394W	RPT3	-0.07	-0.05	0.29	-0.17	0.09	0.03	0.35	0.04	0.14	0.19	0.24	-0.04	0.06
YDR395W	SXM1	0.13	0.15	0.03	-0.29	-0.48	-0.05	0.01	0.12	0.34	-0.18	0.15	-0.07	-0.38
YDR396W	YDR396W				-0.24						-0.43	-0.43		0.27
YDR397C	NCB2	0.19	-0.1	0.1	0.25	-0.03	0.14	0.1	0.05	-0.22	0.49	-0.1	-0.05	0.21
YDR398W	UTP5	0.27	0.36	0.22	-0.6	0	0.03	0.25	0.14	0.16	0.37	0.17	-0.17	-0.01
YDR399W	HPT1	0.12	-0.15	-0.12	-0.66	-0.25	0.13	-0.06	0.03	-0.57	0.17	0.29	-0.15	-0.26
YDR400W	URH1	-0.15	-0.03	-0.45	0.07	0.29	-0.16	-0.52	-0.04	0.15	-0.33	-0.41	-0.14	-0.32
YDR401W	YDR401W										-0.79	-0.73		-0.76
YDR402C	DIT2									0.4	-0.43	0.39		0.42
YDR403W	DIT1	0.13	-0.08	-0.23	0.45	0.44	0.45	-0.2	1.04	1.32	-0.66	0.25	0.24	0.77
YDR404C	RPB7	0.06	0.1	-0.14	0.27	0.09	0.04	-0.02	0.13	-0.07	0.19	-0.12	0.11	-0.17
YDR405W	MRP20	-0.26	0.02	0.08	-0.31	-0.05	0.14	-0.12	0.15	-0.54	0.22	-0.14	0.15	0.08
YDR406W	PDR15	-0.08	0.11	-0.22	0.27	0.21	-0.13	-0.17	-0.25	0.12	-0.37	-0.06	-0.09	-0.33
YDR407C	TRS120	0.07	0.01	-0.01	-0.12	0.19	0.1	0.01	0.15	-0.1	-0.11	0.04	-0.22	-0.34
YDR408C	ADE8	0.14	-0.27	-0.48	0.14	-0.31	-0.04	-0.13	-0.2	-0.57	-0.09	0.06	-0.77	-0.1
YDR409W	SIZ1	-0.11	0.36	0.03	-0.06	0.12	-0.3	-0.18	-0.31	-0.17	-0.3	-0.07	-0.38	-0.12
YDR410C	STE14	-0.07	-0.13	-0.64	0.5	-0.15	-0.15	0.04	-0.05	0.24	0.23	-0.21	0.05	-0.14
YDR411C	DFM1	-0.11	-0.26	-0.47	0.1	0.43	-0.15	0	0.21	-0.04	0.08	0.23	-0.25	-0.08
YDR412W	YDR412W	0.1	-0.17	-0.12	-0.05	-0.61	-0.1	-0.08	-0.36	-0.55	0.14	-0.01	-0.34	-0.39
YDR413C	YDR413C				-0.2						-0.17	-0.19		-0.36
YDR414C	ERD1	-0.03	-0.01	-0.53	0.04	-0.01	-0.05	0.03	-0.09	-0.04	-0.24	-0.21	-0.33	-0.09
YDR415C	YDR415C	0.02	-0.24	-0.26	-0.04	-0.32	-0.14	-0.1	-0.02	-0.2	0.17	0.12	0.07	-0.44
YDR416W	SYF1	0.08	0.19	0.03	-0.08	-0.24	0.07	0.12	0.19	-0.04	-0.22	0.14	0.02	0.1
YDR417C	YDR417C	-0.03	-0.21	-0.37	-0.89	-0.2	-0.15	-0.41	-0.03	-0.56	-0.91	-0.51	-0.28	-0.36
YDR418W	RPL12B	0.23	0.03	0.13	0.08	0.07	0.15	0.13	0.21	-0.27	0.7	0.05	0.1	0.37
YDR419W	RAD30	0	-0.07	0.03	-0.17	-0.15	-0.07	0.1	-0.11	-0.09	-0.23	-0.1	-0.22	-0.54
YDR420W	HKR1	-0.09	0.06	-0.11	-0.34	0.07	-0.16	-0.14	-0.04	0.34	-0.1	0.18	0.04	0.51
YDR421W	ARO80	0.04	0.15	0.38	0.41	0.03	0.25	0.16	0.1	0.72	-0.13	0.31	-0.09	0.03
YDR422C	SIP1	0.05	0.24	-0.05	0.1	-0.05	-0.12	-0.07	0.1	0.14	-0.07	0.35	-0.1	-0.02
YDR423C	CAD1	-0.13	-0.14	-0.18	-0.01	-0.13	0.07	-0.5	-0.06	-0.25	0.27	-0.03	-0.42	0.34
YDR424C	DYN2	-0.01	-0.25	-0.11	0.07	-0.05	-0.14	-0.07	0.16	0.11	-0.43	-0.39	-0.08	0.51
YDR425W	SNX41	-0.26	-0.07	-0.12	0.69	0.09	-0.26	-0.19	-0.17	0.26	-0.42	-0.37	-0.39	-0.13
YDR426C	YDR426C										0.11	-0.24		-0.43
YDR427W	RPN9	-0.15	-0.22	0.21	-0.06	0.21	0.01	0.17	-0.14	0.25	-0.28	-0.12	-0.1	-0.27
YDR428C	YDR428C	-0.07	-0.08	-0.34	-0.21	-0.18	-0.39	-0.27	-0.15	-0.09	-0.31	-0.1	-0.23	0.09
YDR429C	TIF35	0.06	-0.01	0.16	-0.16	-0.39	0.28	0.14	-0.06	-0.19	0.26	0.12	-0.17	-0.13
YDR430C	CYM1	0.24	0.36	0.53	-0.5	0.35	0.17	0.13	0.62	0.23	0.63	0.21	0.31	-0.49
YDR431W	YDR431W				0.45						0.57	0.43		-0.07
YDR432W	NPL3	-0.07	0.12	-0.02	-0.94	0.03	-0.19	-0.06	-0.01	-0.13	-0.52	0.23	-0.37	-0.08
YDR433W	YDR433W	0.2	0.29	0.23	-0.54	0.01	0.07	0	0.17	0.01	-0.04	0.68	-0.09	0.66
YDR434W	GPI17	0.01	-0.01	-0.21	-0.08	0.2	-0.12	-0.36	-0.04	0.15	0.14	0.25	-0.21	0.07
YDR435C	PPM1	-0.36	-0.08	0.03	0.64	-0.31	-0.04	-0.29	-0.25	0	0.11	-0.23	0.69	0.27
YDR436W	PPZ2	-0.22	0.1	0.06	0.36	0.23	0.06	-0.09	0.22	0.13	0.47	0.14	0.49	-0.06
YDR437W	YDR437W			-0.19	0.01	-0.47		-0.16		-0.11	-0.55	-0.3	-0.51	-1
YDR438W	YDR438W	0.02	0.3	-0.14	0.24	0.08	-0.07	0.27	0.06	0.04	-0.14	0.17	0.27	0.19
YDR439W	LRS4	0.07	-0.18	-0.21	-0.12	-0.15	-0.11	0.02	-0.03	-0.02	-0.27	-0.16	-0.3	0.07
YDR440W	DOT1	0.1	0.1	-0.03	-0.12	-0.33	-0.01	0.14	-0.06	-0.35	-0.07	-0.04	-0.42	-0.39
YDR441C	APT2	0.03	-0.09	-0.33	-0.16	-0.17	-0.02	-0.28	0.27	-0.13	-0.31	-0.4	0.22	0.2
YDR442W	YDR442W										-0.34	-0.14		0.32
YDR443C	SSN2	-0.18	0.15	0.03	-0.33	0.04	0	-0.04	-0.09	0.35	-0.77	0.14	0.1	-0.07
YDR444W	YDR444W	0.14	0.11	0.13	-0.29	-0.44	0.05	0.07	-0.24	-0.15	0.16	0.04	-0.15	-0.25
YDR445C	YDR445C										0.16	-0.5		-0.14
YDR446W	ECM11											-0.05		-1.54
YDR447C	RPS17B	0.1	-0.15	0.07	-0.17	-0.24	0.09	-0.02	0.01	-0.17	-0.23	-0.08	-0.2	0.14
YDR448W	ADA2	0.27	0.13	0.02	-0.08	0.12	0.09	-0.02	-0.01	-0.06	0.63	-0.11	-0.04	-0.06
YDR449C	UTP6	0.06	0.02	0.14	-0.58	-0.48	-0.05	0.37	-0.13	-0.06	-0.02	-0.04	-0.25	-0.26
YDR450W	RPS18A	0.15	-0.17	-0.07	-0.43	-0.18	0.03	0.02	0.18	-0.38	-0.06	-0.1	-0.07	0
YDR451C	YHP1	-0.1	0.01	-0.14	-0.06	-0.19	-0.13	0	0.01	-0.18	-0.67	-0.2	0.13	-0.03
YDR452W	PPN1	-0.04	-0.2	0.01	0.15	-0.22	-0.05	-0.05	-0.14	-0.02	0.12	-0.19	-0.17	-0.18
YDR453C	TSA2	-0.13	-0.58	-0.08	-0.2	-0.4	0.2	-0.39	0.25	-0.07	0.54	0.49	0.14	0.21
YDR454C	GUK1	0.14	-0.18	-0.09	-0.21	-0.1	0.1	0.03	0.35	-0.44	-0.29	-0.29	-0.14	0.14
YDR455C	YDR455C										0.17	-0.22		-0.59
YDR456W	NHX1	-0.4	-0.16	-0.37	0.31	-0.06	-0.22	-0.14	-0.06	-0.45	-0.3	-0.08	-0.11	-0.34
YDR457W	TOM1	-0.17	0.1	-0.04	-0.18	-0.25	-0.18	-0.2	-0.11	-0.14	-0.1	0.28	-0.09	0.24
YDR458C	YDR458C	0.05	-0.15	-0.04	0.14	-0.36	-0.08	0.06	-0.14	-0.05	-0.06	0.14	-0.31	-0.38
YDR459C	YDR459C	-0.22	0.02	-0.34	-0.08	-0.17	-0.21	-0.15	-0.04	-0.27	-0.09	-0.27	0.05	-0.07
YDR460W	TFB3	0.1	-0.07	0.13	0.14	-0.01	0.18	0.3	-0.14	0.06	-0.02	-0.03	-0.14	0.13
YDR461W	MFA1	0.18	0.15	-1.25	-0.7	-1.28	-0.34	-0.37	-0.82	-1.37	-0.41	-0.59	2.81	-0.85
YDR462W	MRPL28	0.09	-0.12	0.13	-0.14	0.03	0.05	-0.08	0.22	-0.62	0.25	0.07	0.07	-0.3
YDR463W	STP1	0.13	0.2	0.16	0.28	-0.02	0.03	-0.15	0.13	-0.04	0.12	0.04	-0.03	-0.17
YDR464W	SPP41	0.1	0.09	0.16	-0.1	-0.23	-0.19	0	-0.28	-0.19	0.21	-0.01	-0.39	0.18
YDR465C	RMT2	0.28	-0.07	-0.12	-0.15	-0.42	-0.08	0.15	0.11	-0.25	0.58	0.41	-0.17	-0.64
YDR466W	PKH3	-0.18	0	0	-0.16	-0.11	-0.19	-0.16	-0.27	-0.19	-0.02	0.07	-0.16	-0.01
YDR467C	YDR467C										0	-0.26		-0.06
YDR468C	TLG1	0.07	-0.17	0.05	0.28	0.02	0.14	0.12	-0.02	0.2	0.36	0	0.25	-0.32
YDR469W	SDC1	0.29	-0.24	0.12	0.02	-0.45	0.32	-0.12	0.15	-0.01	-0.6	-0.91	-0.11	-0.42
YDR470C	UGO1	0.07	0.07	0.15	-0.53	0.11	0.06	0	0.39	-0.24	0.01	0.48	0.36	-0.24
YDR471W	RPL27B	0.1	-0.3	-0.13	-0.59	-0.24	-0.02	-0.16	0.16	-0.47	-0.18	-0.34	-0.22	-0.06
YDR472W	TRS31	0.17	0.3	0.06	0.05	0.22	0	0.4	0.07	0.36	0.12	0.12	-0.04	-0.08
YDR473C	PRP3	0.01	-0.02	0.17	0.64	-0.33	0.07	0.14	-0.48	0.17	0.11	0.17	-0.22	-0.01
YDR474C	YDR474C	-0.07	0.14	0.08	0.05	0.2	0.01	-0.24	-0.16	-0.09	-0.07	-0.2	-0.04	0.19
YDR475C	YDR475C					0.07					-0.14	-0.53		-0.88
YDR476C	YDR476C	-0.17	-0.3	-0.43	0.49	0.13	-0.21	-0.32	0.3	0.02	-0.1	0.18	-0.2	0.16
YDR477W	SNF1	-0.09	0.03	0.11	-0.43	-0.17	-0.26	-0.07	-0.21	-0.49	0.18	0.08	-0.48	-0.37
YDR478W	SNM1	0.24	0.12	0.05	0.27	-0.45	-0.03	-0.04	-0.11	-0.13	0.33	-0.33	-0.07	-0.15
YDR479C	PEX29	0.04	0.13	0.14	0.03	0.19	0.07	-0.07	0.04	-0.04	0.56	-0.04	-0.1	0.23
YDR480W	DIG2	-0.03	-0.16	-0.02	-0.1	-0.12	-0.04	-0.26	-0.25	-0.35	0.13	-0.21	-0.62	-0.18
YDR481C	PHO8	-0.04	-0.05	-0.2	-0.15	-0.13	-0.19	-0.91	-0.41	-0.26	-1.14	-1.31	-1.45	-1.51
YDR482C	CWC21	0.05	-0.17	-0.34	0.18	-0.69	-0.17	0.27	0.03	-0.16	0.42	0	0.26	0.23
YDR483W	KRE2	0.09	0.15	0.09	0.37	0.08	0.09	-0.07	-0.14	0.06	-0.11	-0.06	0.01	0.27
YDR484W	VPS52	0.04	0	0.06	-0.08	0.15	0.17	0.24	0.03	0.01	-0.12	0.04	-0.08	0.08
YDR485C	VPS72	-0.16	0.48	0.21	0.15	-0.12	0.02	0.12	-0.15	-0.02	0.15	0.29	-0.19	0.07
YDR486C	VPS60	0.02	-0.22	-0.09	0.65	-0.17	0.14	0.03	0.05	-0.14	0.58	0.03	0.2	0.15
YDR487C	RIB3	-0.08	-0.02	-0.2	0.53	-0.2	-0.03	-0.2	0.04	0.16	0.02	0.04	-0.13	-0.12
YDR488C	PAC11	0.2	0.32	0.18	-0.17	0.26	0.07	0.09	0.26	0.26	0.16	0.02	0.29	-0.12
YDR489W	SLD5	-0.1	0.15	-0.17	-0.07	-0.07	-0.09	0.01	0.08	0	-0.09	-0.41	0.38	-0.24
YDR490C	PKH1	0.07	-0.11	-0.08	0.26	0.69	0.13	0.01	-0.05	0.2	0.32	-0.03	0.15	-0.11
YDR491C	YDR491C										0.51	-0.3		-1.14
YDR492W	IZH1	-0.17	0.01	-0.56	0.71	-0.48	-0.25	0.23	-0.2	-0.35	-0.13	-0.42	-0.16	-0.72
YDR493W	YDR493W	0.05	-0.1	0.2	0.14	0.05	0.16	-0.04	0.53	-0.68	0.72	0.04	0.21	-0.13
YDR494W	RSM28	-0.08	-0.07	0.25	0.02	-0.21	0.02	0.17	0.07	-0.71	0.47	0.07	0.03	-0.47
YDR495C	VPS3	0.23	0.27	0.14	0.43	0.01	0.15	0.14	0.16	0.19	-0.68	0.27	-0.06	-0.1
YDR496C	PUF6	0.03	0.19	0.17	-0.31	-0.57	-0.08	0.22	-0.05	0.15	-0.26	0.01	-0.31	-0.58
YDR497C	ITR1	-0.01	-0.17	-0.16	-0.07	-0.55	-0.28	-0.6	-0.04	-0.42	0.39	-0.24	0.11	0.65
YDR498C	SEC20	-0.01	-0.12	-0.2	-0.15	0.05	-0.11	-0.11	0.06	0.03	0.1	0.03	-0.14	0.33
YDR499W	LCD1	0	-0.28	-0.03	0.02	-0.16	0.04	-0.04	0.05	0.18	-0.43	-0.18	-0.17	-0.14
YDR500C	RPL37B	0.11	0	0.05	-0.15	-0.04	0.07	0.15	0.14	0.13	0.27	0.16	-0.19	0.45
YDR501W	PLM2			0.24	-0.46		-0.11	-0.19		0.11	0.62	-0.36	-0.24	-0.04
YDR502C	SAM2	0.1	-0.03	0.01	-0.23	-0.29	-0.08	-0.61	0.03	0.07	0.26	-0.29	0.16	0.31
YDR503C	LPP1	-0.15	-0.07	-0.14	-0.48	0.64	0.07	0.01	0.14	0.23	0.59	0.17	0.36	0.37
YDR504C	SPG3	-0.27	-0.07	-0.26	0.28	0.03	-0.04	-0.09	-0.08	0.17	-0.18	-0.03	0.02	0.59
YDR505C	PSP1	-0.25	0	-0.16	-0.1	-0.16	0.01	-0.35	-0.25	0.02	-0.33	-0.31	0.07	-0.16
YDR506C	YDR506C	0.18	0.1	0.23	0.25	0.11	-0.02	0	0.07	-0.01	-0.29	0.34	0.32	-0.09
YDR507C	GIN4	0.01	0.24	0.25	0.12	-0.05	0.29	0.07	-0.18	0.23	-0.43	0.23	-0.19	-0.03
YDR508C	GNP1	-0.23	0.04	0.16	-0.03	0.48	-0.37	0.11	-0.22	-0.18	0.03	-0.24	0.15	0.43
YDR509W	YDR509W	-0.03	0.1	0.31	-0.18	0.97	0.04	0.17	0.28	-0.55	0.4	-0.09	0.29	0.33
YDR510W	SMT3	-0.1	-0.51	-0.21	-0.34	0.03	-0.09	-0.18	-0.09	-0.54	-0.48	-0.29	-0.57	0.18
YDR511W	ACN9	0.06	-0.17	0.2	0.12	0.3	0.21	0.02	0.56	-0.2	-0.13	-0.24	0.42	0.06
YDR512C	EMI1	-0.09	-0.31	0.12	0.33	0.09	-0.17	-0.09	0.16	-0.15	0.75	-0.33	0.39	0.84
YDR513W	GRX2	-0.12	-0.09	0.45	0.04	0.34	0.11	-0.05	0.18	-0.17	0.19	-0.22	0.33	0.44
YDR514C	YDR514C	0.13	0.07	0.18	-0.55	-0.61	-0.03	-0.17	-0.14	0.05	0.03	0.21	-0.15	-0.53
YDR515W	SLF1	0.05	0.12	0.69	-0.08	0.02	0.16	0.21	0.05	0.06	-0.46	-0.04	0.17	-0.36
YDR516C	EMI2	-0.03	0.2	0.09	0.14	0.63	0.08	-0.18	-0.03	0.2	0.08	-0.21	0.87	-0.18
YDR517W	GRH1	-0.21	0.28	-0.21	-0.02	0.29	0.26	-0.24	0.09	-0.28	-0.1	0.07	0.3	0.03
YDR518W	EUG1	-0.12	-0.25	-0.59	-0.67	0.59	-0.22	-0.21	0.26	0.3	-0.61	0.06	-0.25	-0.08
YDR519W	FPR2	-0.06	-0.33	-0.47	-0.05	0.27	-0.25	-0.23	0.37	0.13	-0.87	-0.13	-0.31	0.18
YDR520C	YDR520C	0.13	0.23	0.04	0.09	-0.24	0.05	-0.09	-0.05	-0.13	-0.07	0.26	0	-0.17
YDR521W	YDR521W										-0.47	-0.3		-0.15
YDR522C	SPS2										1			-1.54
YDR523C	SPS1				0.38	0.01		-0.05		0.84	-0.35	-0.14		-0.59
YDR524C	AGE1	-0.11	0.24	-0.12	-0.36	-0.1	-0.06	-0.02	0.05	0.19	-0.3	-0.32	0.12	-0.13
YDR525W	API2				0.11						-0.65			1.41
YDR525W-A	SNA2	-0.19	0.16	-0.33	0.87	-0.18	0.16	-0.26	0.24	0.28	-0.76	-0.21	0.69	0.52
YDR526C	YDR526C										0.34	-0.25		0.13
YDR527W	RBA50	-0.02	0.01	0.04	-0.23	-0.27	-0.05	0.28	-0.47	0.55	-0.14	0.13	-0.5	-0.41
YDR528W	HLR1	0.17	-0.21	-0.08	-0.24	0.32	-0.22	-0.17	0.25	0.02	-0.48	-0.16	-0.55	0.31
YDR529C	QCR7	-0.04	-0.31	-0.27	0.14	-0.21	0.09	-0.14	0.4	-0.72	0.05	-0.11	0.49	0.12
YDR530C	APA2	-0.05	-0.07	-0.34	0.74	-0.33	-0.05	-0.23	-0.12	-0.28	-0.08	-0.12	0.1	0.02
YDR531W	YDR531W	-0.1	0	0.02	0.72	-0.05	-0.01	0.13	0.01	0.1	0.22	0.03	-0.19	-0.2
YDR532C	YDR532C	0.16	0.14	0.41	0.54	-0.27	0.24	0.2	-0.13	0.33	0.61	0.01	-0.01	0.01
YDR533C	HSP31	0.06	0.13	0.21	0.08	-0.05	0.66	-0.34	0.8	0.29	1.21	0.18	0.72	0.51
YDR534C	FIT1		0.07	-0.41	0.14	0.7	-0.41	-0.1		-0.04	-0.76	0.49	0.16	1.14
YDR535C	YDR535C
YDR536W	STL1										0.06	-1.09		-0.71
YDR537C	YDR537C										-1.86	-0.69		0.07
YDR538W	PAD1	-0.2	0.08	-0.53	0.14	-0.12	0.11	-0.45	-0.04	-0.24	-0.15	-0.12	-0.63	0.01
YDR539W	YDR539W	0.02	0.03	-0.25	-0.35	0.21	-0.07	-0.79	0.18	0.1	-0.22	0.35	-0.14	0.16
YDR540C	YDR540C					0.5				0.99	-1.39			-0.69
YDR541C	YDR541C	-0.15	-0.29	-0.21	-0.12	-0.08	-0.32	-0.02	0.07	0.43	-0.57	-0.19	0.16	0.14
YDR542W	YDR542W	0	0.08	-0.31	0.46	0.52	-0.01	0.02	0.04	0.77	-0.36	0.27	0.21	0.15
YDR543C	YDR543C		0.15	-0.57	0.23	0.06		-0.04		-0.11	-0.32	0.5	-0.17	-0.05
YDR544C	YDR544C				-0.18									-0.19
YDR545W	YRF1-1	0	0.33	0.22	-0.36	0.66	-0.09	0.11	-0.28	0.35	0.55	-0.07	-0.06	0.18
YEL001C	YEL001C	-0.07	-0.12	-0.13	0.8	0.04	0.03	-0.04	-0.05	-0.16	-0.18	0.17	-0.05	-0.04
YEL002C	WBP1	-0.14	-0.04	-0.25	0.87	-0.08	-0.26	-0.03	-0.12	-0.33	-0.45	0.23	-0.12	0.28
YEL003W	GIM4	0.22	0.05	0.16	1.32	-0.13	0.13	0.3	0.12	0.02	-0.05	-0.06	-0.04	0.32
YEL004W	YEA4	0.11	0.02	-0.18	1.09	0.07	-0.32	0.26	0.14	0.36	0.19	0.2	0.19	0.18
YEL005C	VAB2	0.1	-0.19	0.05	1.13	-0.04	-0.04	0.04	0.11	0.18	-0.15	0.01	0.21	0.35
YEL006W	YEL006W	-0.1	0.06	-0.25	0.75	-0.36	-0.22	-0.35	-0.01	-0.13	-0.47	-0.58	-0.22	-0.38
YEL007W	YEL007W	-0.23	-0.02	-0.09	-0.36	-0.01	-0.27	-0.53	-0.26	-0.68	-0.34	-0.11	-0.49	0.2
YEL008W	YEL008W										0.99
YEL009C	GCN4	-0.17	0.28	0.21	1.72	-0.27	-0.05	-0.03	-0.06	0.62	-0.41	0.13	0.21	0.24
YEL010W	YEL010W										-1.96
YEL011W	GLC3	-0.22	0.16	0.27	1.81	0.71	0.69	-0.57	0.02	-0.04	1.64	0.35	1.2	0.74
YEL012W	UBC8	-0.02	-0.23	0.42	1.7	0.15	0.31	0	0.09	0.36	0.15	-0.15	0.27	0.39
YEL013W	VAC8	-0.11	-0.04	-0.04	0.99	-0.05	-0.2	-0.12	-0.16	0.2	-0.36	0.02	0.11	-0.31
YEL014C	YEL014C										-2.17			-1.78
YEL015W	EDC3	-0.05	-0.04	0.03	0.84	-0.4	-0.1	0.04	-0.22	-0.2	-0.2	-0.53	-0.2	-0.37
YEL016C	YEL016C	0.04	0.06	-0.04	0.79	-0.02	-0.07	-0.05	-0.35	-0.14	0.26	-0.19	-0.05	0.22
YEL017C-A	PMP2	-0.23	0.11	-0.09	0.06	-0.14	-0.32	-0.29	-0.3	-0.35	-1.24	-0.28	-0.1	0.41
YEL017W	GTT3	0.13	0.37	0.13	0.97	0.48	0.15	-0.11	0.1	-0.27	0.6	0.14	0.15	0.46
YEL018W	EAF5	0.08	0.16	0.06	0.88	-0.45	0.01	0.09	-0.13	-0.49	0.22	-0.28	-0.45	-0.27
YEL019C	MMS21										-0.25	0.25		0.11
YEL020C	YEL020C	0.03	0.42	0.18	0.77	0.13	0.2	-0.17	0.03	0.1	0.13	0.15	0.21	-0.28
YEL020W-A	TIM9	0.02	-0.12	0.39	1	-0.18	0.25	-0.05	0.43	-0.58	0.1	-0.37	0.01	0.05
YEL021W	URA3	-0.03	-0.1	-0.71	0.95	-0.59	-0.38	-1.65	-0.61	1.48	1.3	0.2	-1.6	-0.03
YEL022W	GEA2	-0.08	0.02	0	0.88	0.03	0	-0.04	-0.21	-0.19	0.07	0.24	-0.54	-0.15
YEL023C	YEL023C	-0.22	-0.11	0.02	0.49	0.18	-0.19	0.28	0.04	0.42	0.27	0.18	-0.27	-0.01
YEL024W	RIP1	-0.3	-0.07	-0.18	1.29	0.01	-0.15	-0.13	0.37	-1.33	0.08	0.08	0.76	-0.3
YEL025C	YEL025C	-0.18	0.04	-0.04	0.84	0.11	-0.32	-0.12	-0.14	0.01	-0.19	0	-0.01	-0.12
YEL026W	SNU13	-0.05	-0.17	-0.34	0.02	-0.33	-0.14	-0.42	0	-0.24	-0.47	-0.25	-0.16	0.27
YEL027W	CUP5	-0.11	0.03	0.03	1.49	-0.01	-0.09	-0.04	0.05	0.03	-0.58	-0.31	-0.05	0.61
YEL028W	YEL028W	-0.18	0.13	-0.21	1.09	0	-0.04	-0.15	-0.15	0.31	-0.22	-0.22	0.13	0.02
YEL029C	BUD16	-0.02	0.07	-0.16	1.31	-0.09	-0.1	-0.15	-0.03	0.03	-0.03	-0.16	-0.14	-0.47
YEL030W	ECM10	-0.01	0.14	-0.22	1.31	0.53	0.16	-0.14	0.25	0.23	0.06	-0.36	-0.26	0.04
YEL031W	SPF1	-0.07	0.16	0.06	1.17	0.34	-0.01	0.33	0.33	0.15	0.48	0.54	-0.13	0.2
YEL032W	MCM3	0.11	0.22	0.01	0.69	-0.13	0.1	-0.11	0.02	-0.25	0.01	0.17	0.2	0.17
YEL033W	YEL033W		0.4	-0.28	0.28	0.12		-0.42		1.13	-0.51	-0.09	0.32	0.46
YEL034W	HYP2	0.01	0.3	0.22	1.51	0.09	0.19	0.23	0.02	-0.01	-0.6	-0.17	0.26	0.54
YEL035C	UTR5				0.28						0.9	0.31		0.32
YEL036C	ANP1	-0.36	-0.04	-0.22	0.27	0	-0.21	-0.18	-0.25	-0.03	0.11	0.02	-0.46	0.13
YEL037C	RAD23	0.1	0.17	0.25	0.59	0.4	0.14	0.14	0.11	0.01	0.08	0.51	-0.38	-0.2
YEL038W	UTR4	-0.15	-0.03	0.11	1.21	0.14	0.08	0.15	-0.04	-0.1	0.32	-0.2	-0.16	0.3
YEL039C	CYC7	-0.15	-0.11	1.21	2.48	0.88	0.75	0.6	0.91	1.21	0.85	-0.52	1.18	1.04
YEL040W	UTR2	0.06	0.14	0.06	1.44	-0.54	-0.23	-0.1	-0.11	0.23	-0.29	-0.05	0.1	0.91
YEL041W	YEL041W			0.35	0.42	0.33				-0.25	-0.08	0.69	0.09	0.15
YEL042W	GDA1	-0.2	-0.07	-0.39	0.25	-0.24	-0.21	-0.28	-0.21	-0.44	-0.19	-0.02	-0.18	-0.17
YEL043W	YEL043W	0.03	0.33	0.19	0.49	0.21	-0.18	0.17	0.03	-0.19	0.05	0.26	-0.06	0.76
YEL044W	IES6	0.12	-0.23	-0.3	1.12	-0.4	0.06	-0.43	0.12	-0.14	0.35	-0.19	-0.34	0.05
YEL045C	YEL045C											1.11		0.41
YEL046C	GLY1	-0.15	0.11	-0.26	0.84	0.08	-0.15	-0.1	-0.11	-0.4	-0.2	0.41	-0.22	-0.32
YEL047C	YEL047C	-0.09	0.05	-0.31	1.71	0.06	-0.06	-0.1	0.15	0.4	-0.55	-0.16	0.45	-0.27
YEL048C	YEL048C	0.1	0.03	-0.18	0.38	-0.31	0.08	0.18	0.11	-0.53	-0.04	-0.11	0.06	-0.17
YEL049W	PAU2	-0.09	0.04	-0.36	0.37	0.26	-0.15	-0.03	-0.23	0.69	-0.53	0.14	0.16	0.24
YEL050C	RML2	0	0.12	0.43	0.54	0.08	0.32	-0.01	0.59	-0.35	0.3	0.15	0.53	-0.68
YEL051W	VMA8	0.08	-0.3	0.11	1.37	-0.15	0.07	0.16	-0.32	-0.18	0.09	-0.32	-0.31	0.03
YEL052W	AFG1	-0.01	0.16	-0.18	1.44	0.07	0.07	0.03	0.06	0.24	-0.07	0.3	0.46	0.18
YEL053C	MAK10	0.27	-0.06	0.17	0.43	-0.05	-0.03	0.26	0.14	-0.28	-0.44	0.12	-0.29	-0.51
YEL054C	RPL12A	0.05	-0.05	-0.16	0.43	-0.24	-0.01	-0.08	-0.01	-0.38	0.05	-0.16	0.01	0
YEL055C	POL5	-0.05	0.02	-0.13	0.62	-0.48	-0.06	-0.21	-0.13	-0.34	-0.42	0.17	-0.46	-0.56
YEL056W	HAT2	0.06	-0.06	-0.15	0.91	-0.2	0.06	0.01	-0.09	-0.42	0.49	0.07	-0.14	-0.19
YEL057C	YEL057C										0.44	-0.32		0.1
YEL058W	PCM1	-0.05	0.21	0.04	1.35	0.18	0.3	0.17	0.1	0.85	-0.46	-0.2	0.62	0.1
YEL059C-A	SOM1	-0.07	-0.43	-0.19	1.14	0.21	0.14	-0.2	0.46	0.44	0.42	-0.22	0.1	0.57
YEL059W	YEL059W										-1.03	-0.13		0.19
YEL060C	PRB1	-0.42	0.45	-0.24	1.04	0.63	0.24	-0.33	-0.29	0.66	-0.67	0.71	0.58	0.01
YEL061C	CIN8	-0.03	0.28	0.24	0.98	-0.2	0.07	0.08	-0.28	-0.25	0.14	-0.21	-0.46	-0.2
YEL062W	NPR2	-0.02	0.06	-0.06	0.99	0.12	0	-0.1	0.21	0.12	-0.5	0.12	0.07	-0.03
YEL063C	CAN1	-0.13	0.18	-0.04	0.04	0.17	-0.15	0.11	0.05	0.22	-0.43	-0.38	0.03	-0.58
YEL064C	AVT2	-0.17	0.06	-0.3	1.09	-0.28	-0.13	-0.29	-0.02	-0.25	-0.16	-0.05	-0.29	-0.38
YEL065W	SIT1	-1.47	-0.93	-0.96	2.3	0.11	0.33	-1.67	-0.12	0.52	-1.82	1.17	-1.04	0.06
YEL066W	HPA3	0.15	-0.01	-0.14	1.39	-0.07	0.14	-0.1	0.11	-0.31	0.14	0.08	0.53	-0.23
YEL067C	YEL067C		-0.15	-0.4	0.92	0.28	-0.32	0.12	-0.07	-0.19	-0.83	0.4	0.06	-0.34
YEL068C	YEL068C	0.02	-0.27	-0.1	1.62	0.06	-0.1	0.12	-0.02	-0.33	-0.81	0.08	0.05	-0.02
YEL069C	HXT13										-0.27
YEL070W	YEL070W			0.22		0.83		-0.05		1.72	-0.05	0.73	0.99	0.71
YEL071W	DLD3	-0.04	0.5	1.04	2.64	0.86	0.34	0.32	-0.17	1.56	-0.7	-0.41	-0.11	0.03
YEL072W	RMD6	-0.04	-0.14	0.06	1.22	-0.17	0.26	-0.16	-0.16	0.1	-0.27	-0.71	-0.45	-0.27
YEL073C	YEL073C	0.29	-0.27	-0.38	0.51	-0.68	-0.4	-0.29	-0.16	-0.16	-0.21	-0.74	-0.12	0.04
YEL074W	YEL074W	-0.04	0.31	-0.06	-0.08	0.41	0.06	0.58	0.32	0.38	-0.11	0.04	0.1	-0.13
YEL075C	YEL075C	-0.03	0.26	0.15	-0.05	-0.15	-0.19	-0.15	-0.24	0.06	-0.33	-0.51	-0.57	-0.37
YEL075W-A	YEL075W-A	-0.26	0.16	-0.03	-0.64	0.27	-0.37	0.2	0.16	0.18	-0.48	-0.07	-0.16	-0.59
YEL076C	YEL076C	0.14	-0.17	0.15	-0.47	0.25	-0.18	0.01	0	-0.03	-0.05	-0.46	-0.15	-0.8
YEL076C-A	YEL076C-A				0.09					-0.39	-0.55	-0.01		-0.71
YEL077C	YEL077C	0.04	0.19	0.25	-0.24	0.45	0.03	0.06	-0.32	0.31	-0.25	0.2	0.01	0.47
YER001W	MNN1	0.12	-0.07	-0.22	1.01	-0.69	-0.21	0	-0.42	-0.6	0.1	-0.1	-0.61	-0.13
YER002W	NOP16	0.21	0.08	0.36	1.2	-0.56	0.14	0.47	-0.23	0.36	0.24	0.28	-0.13	-0.2
YER003C	PMI40	-0.2	-0.02	-0.24	0.62	0.09	-0.16	-0.12	0.08	-0.21	-0.45	-0.11	0.09	0.15
YER004W	YER004W	-0.06	0.12	0.32	1.55	0.25	0.17	0.09	0.45	-0.04	-0.05	-0.08	0.46	0.46
YER005W	YND1	0.01	0.33	0	0.87	-0.02	-0.11	-0.02	0.05	0.02	-0.37	-0.18	0.04	0.02
YER006W	NUG1	0.08	-0.06	-0.16	0.63	-0.72	-0.18	-0.17	-0.1	0.04	-0.08	0.17	-0.28	-0.08
YER007C-A	YER007C-A	0.1	-0.39	-0.08	0.7	-0.15	0.12	-0.03	0.2	-0.04	-0.23	0.09	-0.36	0.15
YER007W	PAC2	0.38	0.01	0.1	1.06	-0.06	0.2	0.27	0.34	0.24	0.07	-0.26	0.18	-0.17
YER008C	SEC3	-0.05	0.03	0.12	0.69	-0.03	-0.27	-0.02	-0.27	-0.13	0.08	0.16	-0.47	0.03
YER009W	NTF2	-0.06	-0.21	-0.04	1.32	-0.11	-0.08	-0.32	0.02	-0.3	-0.8	-0.39	-0.17	0.12
YER010C	YER010C	0.02	-0.14	0.01	1.4	0.07	0.07	0.09	0.14	0.04	0	0.05	0.29	0.17
YER011W	TIR1	-0.01	0.07	0	0.64	-0.11	0.1	-0.09	0	0.56	-0.97	-0.4	0.32	0.59
YER012W	PRE1	-0.14	-0.25	0.41	0.98	0.26	0.03	0.17	0.11	-0.06	-0.34	-0.42	-0.15	-0.14
YER013W	PRP22	0.26	0.41	0.19	1.13	0.05	0.18	0.21	0.06	0.08	-0.14	0.31	-0.06	0.08
YER014C-A	BUD25				-0.14						-1.27	-0.86		-1.41
YER014W	HEM14	-0.05	0	-0.23	0.94	0.17	0.26	-0.06	0.06	0	-0.28	0.21	0.22	-0.64
YER015W	FAA2	-0.13	-0.22	-0.22	0.77	-0.38	-0.12	-0.5	-0.39	-0.32	-0.42	-0.65	-0.4	-0.2
YER016W	BIM1	0.05	0.1	-0.01	0.95	-0.21	0	0.05	-0.45	-0.49	-0.52	-0.02	0.03	-0.37
YER017C	AFG3	-0.05	0.28	0.09	0.35	0.15	0.02	0.03	0.27	-0.25	0.22	0.42	0.15	0.01
YER018C	SPC25	0.13	0.31	-0.35	0.83	0.09	0.02	-0.29	0.36	0.02	0.48	0.16	0.12	1.59
YER019C-A	SBH2	0.14	-0.17	-0.09	0.99	-0.22	0.1	-0.11	0.2	-0.23	0.08	-0.2	-0.13	0.3
YER019W	ISC1	-0.19	-0.03	-0.32	0.83	0.07	0.1	-0.02	-0.14	0.01	-0.28	-0.29	-0.05	0.15
YER020W	GPA2	-0.18	0.21	-0.19	1.19	0.07	0.02	-0.28	-0.24	-0.1	0.03	-0.13	-0.35	-0.08
YER021W	RPN3	-0.09	0.01	0.4	0.85	0.13	0.05	0.36	0.18	0.32	-0.04	-0.2	0.01	-0.38
YER022W	SRB4	-0.2	0.03	0.12	1.1	-0.24	0.03	0.26	-0.08	0.05	-0.53	0.16	-0.11	-0.01
YER023W	PRO3	-0.05	0.26	0.03	1.12	-0.15	0.1	-0.03	0.08	0.04	-0.11	-0.17	0.21	0.38
YER024W	YAT2	0.03	0.43	0.39	3.34	0.08	0.02	-0.04	-0.03	1.03	0.27	-0.14	-0.11	0.44
YER025W	GCD11	-0.02	0.06	-0.05	0.46	-0.28	-0.06	-0.04	-0.09	0.01	-0.1	0.08	-0.18	-0.7
YER026C	CHO1	0.07	-0.19	-0.25	1.34	-0.68	-0.07	-0.09	0.34	-0.11	0.31	0.14	0.47	0.35
YER027C	GAL83	-0.19	-0.04	-0.11	0.27	0.06	-0.4	-0.15	-0.14	-0.33	-0.04	-0.11	-0.45	-0.5
YER028C	MIG3	-0.16	0.48	0.51	1.08	0.34	0.44	0.14	0.92	-0.04	-0.44	-0.69	-0.61	0.2
YER029C	SMB1	0.01	-0.05	0.12	1.08	-0.39	0.22	-0.02	-0.12	-0.27	0.2	0.09	-0.25	0.06
YER030W	YER030W	0	0.04	0.49	1.39	0.08	0.26	0.29	-0.06	0.25	0.02	0.07	0.28	0.29
YER031C	YPT31	-0.04	-0.14	0.06	0.72	-0.06	0.03	0.14	-0.02	-0.1	0.28	0	-0.17	0.09
YER032W	FIR1	-0.14	0	0.01	0.59	0.01	-0.39	-0.03	-0.31	-0.27	0.09	0.06	-0.56	0.23
YER033C	ZRG8	-0.23	-0.05	-0.01	0.47	0.31	-0.17	-0.05	-0.6	0.07	-0.36	-0.02	-0.19	-0.02
YER034W	YER034W	-0.07	-0.26	-0.08	1.27	-0.19	-0.01	-0.3	-0.33	-0.11	-0.27	-0.23	-0.24	0.39
YER035W	EDC2	-0.26	-0.08	-0.3	1.07	-0.1	0.01	-0.55	-0.08	-0.25	0.35	-0.61	0.23	0.39
YER036C	YER036C	0.01	0.16	-0.06	0.09	-0.42	-0.06	-0.14	-0.14	-0.28	-0.3	-0.09	-0.36	-0.39
YER037W	PHM8	-0.19	0.17	0.77	0.98	0.18	0.24	-1.43	-0.16	-0.44	0.34	-1.81	0.26	-0.15
YER038C	KRE29	-0.04	0.55	0.27	0.71	0.03	-0.09	0.05	-0.16	0.13	-0.39	0.07	0.45	-0.53
YER039C	HVG1	-0.26	0.18	-0.21	1.52	-0.09	0.07	-0.16	-0.16	-0.4	0.1	-0.54	0.42	0.3
YER039C-A	YER039C-A										-0.19	-0.91		-0.06
YER040W	GLN3	-0.01	0.24	0.03	1.5	-0.01	-0.07	-0.11	-0.02	0.05	-0.31	0.24	-0.24	-0.35
YER041W	YEN1	-0.1	0.02	0.04	0.66	-0.23	-0.2	0.17	-0.46	-0.12	-0.26	-0.09	-0.39	-0.29
YER042W	MXR1	-0.26	0.04	-0.14	0.9	0.57	0.09	-0.1	-0.13	-0.6	0.3	-0.16	0.51	-0.42
YER043C	SAH1	-0.12	0.04	-0.04	1.03	-0.18	-0.04	-0.4	-0.07	0.08	-0.44	-0.46	0.14	0.06
YER044C	ERG28	-0.19	-0.27	-0.52	1.27	-0.4	-0.13	-0.28	-0.18	0.47	-1.6	-0.82	-0.18	0.12
YER044C-A	MEI4				0.3						-0.55	-0.04		0.31
YER045C	ACA1	0.11	-0.3	-0.49	1.08	0.1	-0.04	-0.39	-0.3	0.81	0.19	-0.31	0.48	-0.17
YER046W	SPO73	0.02	-0.64	-0.15	0.72	0.17	0.29	-0.33	0.14	0.21	-0.02	-0.51	0.13	0.42
YER047C	SAP1	0.07	0.15	-0.11	0.78	-0.21	0.07	-0.16	-0.17	-0.28	-0.04	0.23	-0.22	-0.15
YER048C	CAJ1	0.03	-0.07	0.22	1.39	-0.19	0.28	0.19	-0.18	0.08	-0.04	-0.03	-0.17	0.12
YER048W-A	YER048W-A	0.18	-0.19	0.08	1.23	-0.01	0.2	0.07	0.36	0.37	-0.66	-0.35	0.16	0.39
YER049W	YER049W	0.18	-0.02	0.03	0.72	-0.18	-0.02	0.05	0.17	0.18	-0.56	0.09	-0.29	-0.11
YER050C	RSM18	0.22	-0.17	0.29	1.63	-0.03	0.48	0.11	0.33	-0.38	0.79	0.06	0.29	-0.03
YER051W	YER051W	0.02	-0.25	-0.18	1.2	-0.25	0.06	-0.01	-0.2	-0.38	0.2	0	-0.07	-0.16
YER052C	HOM3	-0.14	0.17	-0.12	1.65	0.12	-0.16	-0.29	0.1	0.73	-0.55	0.35	-0.49	-0.62
YER053C	PIC2	0.25	0	0.55	1.34	0.69	0.58	-0.04	0.42	-0.18	2.06	-0.24	1.24	0.86
YER053C-A	YER053C-A	-0.17	0.39	0.42	1.15	0.75	0.31	0.7	-0.31	-0.28	0.73	-0.8	0.47	1.41
YER054C	GIP2			0.09					-0.01		0.78	0.39		0.57
YER055C	HIS1	0.18	0.11	-0.06	1.28	-0.24	0.03	-0.29	-0.03	0	-0.35	0.23	-0.55	-0.31
YER056C	FCY2	0.07	0.47	0.3	1.61	-0.31	-0.17	0.37	-0.15	-0.1	-0.15	0.19	-0.1	-0.71
YER056C-A	RPL34A	-0.1	-0.55	-0.25	0.54	-0.26	-0.17	-0.31	-0.24	-0.58	0.09	-0.05	-0.53	0.03
YER057C	HMF1	-0.14	0.06	0.02	1.27	-0.05	-0.12	-0.2	-0.12	-0.08	-0.78	-0.62	-0.07	-0.16
YER058W	PET117	-0.01	-0.07	0.94	0.45	0.12	0.25	0.02	0.55	-0.93	1.08	-0.26	0.38	-0.52
YER059W	PCL6	0.01	0.07	-0.19	0.79	-0.01	-0.02	-0.08	-0.08	-0.36	0.59	-0.23	-0.23	-0.45
YER060W	FCY21	-0.08	0.47	-0.5	0.04	-0.34	-0.22	-0.26	0	-0.2	0.26	-0.49	0.29	0.34
YER060W-A	FCY22	-0.02	0.42	0.23	1.5	-0.32	-0.18	0.3	-0.15	-0.17	0.62	-0.22	-0.18	0.41
YER061C	CEM1	0	0.34	-0.28	1.56	-0.42	-0.11	-0.32	-0.17	0.11	-0.8	-0.39	-0.17	-0.59
YER062C	HOR2	0.11	0.29	0.44	0.17	0.39	0.44	-0.29	0.1	0.1	0.41	-1.31	0.15	0.45
YER063W	THO1	0.01	-0.04	0.26	0.96	-0.12	0.08	-0.27	-0.06	-0.65	0.28	-0.25	-0.02	0.24
YER064C	YER064C	0.22	0.43	0.09	0.5	0.23	-0.05	0.22	0.07	-0.06	0.01	0.75	0.12	0.58
YER065C	ICL1	0.14	0.25	-0.07	0.71	-0.14	0.43	-0.1	0.25	0.26	1.47	0.04	0.17	0.79
YER066C-A	YER066C-A										-0.26	-0.74		-0.64
YER066W	YER066W	0.08	0.06	-0.08	1.12	0.15	-0.06	0.05	0.05	0.39	0.2	0.07	0.27	0.08
YER067W	YER067W	0.8	0.11	0.24	2.03	-0.19	0.76	0.35	0.81	-0.66	0.82	0.02	1.66	1.24
YER068W	MOT2	-0.06	-0.04	-0.06	0.69	-0.09	-0.2	-0.2	0.03	0.03	-0.69	0.01	-0.26	0.05
YER069W	ARG5,6	0.13	0.24	-0.3	1.12	0.09	-0.01	-0.11	0	-0.33	-0.52	0.66	-0.27	0.07
YER070W	RNR1	-0.04	0.13	-0.14	0.82	-0.34	0.13	-0.38	0.01	-0.47	-0.19	-0.02	-0.18	-0.19
YER071C	YER071C	-0.04	-0.45	-0.32	1.3	-0.11	-0.13	0.22	0.21	-0.16	-0.52	-0.55	-0.47	-0.02
YER072W	VTC1	0.12	0.21	0.1	1.92	-0.02	-0.13	-1.74	-0.24	0.19	-1.35	-1.78	-1.04	-0.88
YER073W	ALD5	0.16	0.26	0.04	1.96	-0.16	0.02	-0.14	0.3	0.1	0.58	0.19	-0.66	-0.59
YER074W	RPS24A	0.14	-0.28	0.04	0.7	-0.15	0.2	-0.06	0.12	-0.12	-0.04	0.04	-0.16	0.28
YER074W-A	YOS1	-0.1	-0.38	-0.11	1.02	-0.29	-0.3	-0.02	-0.13	0.07	0.05	-0.49	-0.13	0.4
YER075C	PTP3	0.04	-0.05	-0.25	0.87	0.2	-0.05	0.1	0.14	-0.13	-0.04	-0.09	-0.25	-0.16
YER076C	YER076C	-0.03	0.27	-0.06	0.9	-0.04	-0.01	-0.03	-0.03	0.03	0.18	-0.16	-0.29	0.03
YER077C	YER077C	0.08	0.07	-0.13	1.04	-0.06	-0.03	0.09	0.22	0.46	-0.82	-0.09	0.16	0.23
YER078C	YER078C	0.13	-0.07	-0.11	0.79	-0.34	0.09	-0.11	0.34	-0.31	0.05	-0.18	-0.04	-0.06
YER079W	YER079W				1.87						0.11	0	0.41	0.22
YER080W	YER080W	0.04	0.02	0.1	0.87	0.2	0.21	0.13	0.2	0.13	-0.32	0.2	0.17	0.03
YER081W	SER3	0.21	-0.02	0.32	1.21	-0.29	-0.03	-0.58	0.19	-0.27	0.11	0.63	-0.97	-0.09
YER082C	UTP7	0.02	0.11	-0.03	0.62	-0.48	-0.24	0.01	-0.41	-0.02	-0.07	0.33	-0.34	-0.49
YER083C	RMD7	-0.1	-0.09	-0.18	1.6	-0.08	-0.15	-0.14	-0.12	-0.05	0.24	0.25	0.13	0.08
YER084W	YER084W													-0.13
YER085C	YER085C										0.82	0.84		0.18
YER086W	ILV1	-0.28	-0.19	-0.34	1.53	-0.27	-0.34	-0.23	-0.2	0.03	-0.68	0.25	-0.32	-0.21
YER087C-B	SBH1	0.09	0.1	0.05	1.12	0.18	0.22	0.11	0.41	0	-0.35	0.02	0.07	0.49
YER087W	YER087W	0.03	0.01	0.18	0.72	0.16	0.23	0.12	0.27	-0.13	0.36	-0.22	0.44	-0.37
YER088C	DOT6	-0.17	0.02	-0.31	0.29	-0.04	-0.37	-0.6	-0.57	0.12	-0.41	0.09	-0.38	-0.17
YER089C	PTC2	-0.04	0.19	-0.3	0.18	-0.13	-0.19	-0.25	-0.03	-0.23	-0.55	0.11	-0.57	-0.47
YER090W	TRP2	0.09	0.13	0.03	1.7	-0.23	0.04	0.12	0.16	0.5	-0.44	0.31	-0.16	-0.31
YER091C	MET6	-0.3	-0.04	-0.65	0.84	-0.79	-0.19	-0.83	-0.49	-0.21	-0.78	-0.8	0.03	-0.24
YER091C-A	YER091C-A										-0.4			-0.05
YER092W	IES5	0	-0.19	-0.01	1.05	-0.1	0.12	0.07	0.06	0	-0.35	-0.2	0.19	0.02
YER093C	TSC11	0.13	0.12	0.07	0.74	-0.26	-0.07	0.03	-0.16	-0.23	0.1	0.24	-0.16	-0.15
YER093C-A	YER093C-A	-0.09	0.08	0.08	0.81	0.12	0.01	-0.11	0.26	-0.57	0.18	-0.16	0.48	-0.01
YER094C	PUP3	-0.01	0.04	0.52	1	0.32	0.28	0.2	0.07	0.09	0.16	-0.2	0.21	0.18
YER095W	RAD51	-0.21	0.2	0.13	1.31	0.36	0.15	-0.07	-0.06	0.39	0.49	-0.68	0.78	-0.01
YER096W	SHC1	-0.19	0.31	0.16	0.96	0.11	-0.13	0.16	0.45	0.53	1.34	-0.47	1.12	-0.68
YER097W	YER097W										0.67	-0.09		0.74
YER098W	UBP9		-0.16	0.15	1.26	-0.16	0.47	-0.12	-0.08	0.16	-0.22	-0.14	0.14	0.2
YER099C	PRS2	0.05	0.05	-0.16	0.83	-0.35	-0.01	-0.14	-0.1	-0.13	0.29	0.06	0.24	-0.52
YER100W	UBC6	-0.07	-0.32	-0.21	1.11	-0.13	-0.02	-0.17	-0.21	0.15	-0.16	0.02	-0.36	-0.28
YER101C	AST2	0.07	0.03	0.08	0.84	0.17	0.1	-0.05	0.06	0.19	0.09	0.12	0.3	-0.15
YER102W	RPS8B	0.03	-0.17	0.71	0.09	-0.23	0.03	-0.04	-0.06	-0.38	-0.41	0.21	-0.18	-0.34
YER103W	SSA4	0.01	0.55	0.43	1.19	0.55	0.91	0.26	0.08	0.22	0.34	0.12	0.16	-0.02
YER104W	RTT105	0.16		0.19	0.71	-0.63	0.09	-0.21	-0.05	-0.42	0.11	-0.04	-0.09	0.26
YER105C	NUP157	-0.08	0.13	-0.11	0.81	-0.38	-0.17	-0.35	-0.28	-0.31	-0.33	0.25	-0.31	-0.24
YER106W	MAM1										-0.04	-0.02		0.08
YER107C	GLE2	0.23	0.12	0.01	0.86	-0.18	-0.07	0.14	0.16	-0.17	0.12	0.14	-0.25	-0.25
YER109C	FLO8	0.07	0.09	0.02	0.75	-0.27	-0.02	-0.15	-0.16	0.33	-0.31	-0.16	-0.11	-0.38
YER110C	KAP123	-0.18	-0.14	-0.44	0.82	-0.44	-0.36	-0.2	-0.11	-0.3	-1	0.02	-0.38	-0.37
YER111C	SWI4	0.08	-0.05	0.32	1.1	0.23	0.07	0.21	-0.17	0.48	-0.91	-0.15	-0.01	0.1
YER112W	LSM4	0.12	-0.1	0.03	0.98	-0.2	0.06	0	-0.3	-0.29	-0.2	0.07	-0.23	-0.14
YER113C	YER113C	-0.07	0.18	-0.12	0.46	-0.14	-0.28	-0.09	-0.08	-0.3	-0.11	0.06	-0.23	-0.41
YER114C	BOI2	-0.07	0.15	-0.2	0.4	-0.3	-0.49	-0.16	-0.38	-0.42	-0.2	0.16	-0.48	-0.19
YER115C	SPR6	-0.11	0.03	-0.14	0.19	-0.32	-0.1	-0.08	-0.08	-0.04	-0.16	-0.2	-0.53	-0.24
YER116C	SLX8	0.22	-0.02	0.23	0.91	-0.01	0.18	-0.06	0.14	0.14	-0.37	0.1	0.21	-0.09
YER117W	RPL23B	0.18	-0.14	-0.03	0.53	-0.14	0.1	-0.06	0.18	-0.03	-0.1	-0.21	-0.18	-0.17
YER118C	SHO1	0.1	0.02	-0.29	0.7	0	-0.07	-0.06	0.04	0.03	-0.04	0.13	-0.01	-0.15
YER119C	AVT6	-0.22	0.02	-0.03	1.23	0.29	-0.01	0.27	0.02	-0.03	0.7	-0.22	0.44	0.16
YER119C-A	YER119C-A											-0.37		-0.33
YER120W	SCS2	0.1	0.15	-0.11	0.76	-0.21	0.02	-0.07	-0.05	-0.41	0.16	0.13	0.29	0.33
YER121W	YER121W				0.46						0.64	-0.32		0.23
YER122C	GLO3	0.11	-0.01	-0.07	1.1	-0.04	0.08	0.21	0	0.26	-0.71	0.11	0.08	-0.05
YER123W	YCK3	0.1	0.16	0.05	0.92	-0.04	0.05	0.41	0.28	0.06	-0.46	0.13	0.06	-0.68
YER124C	DSE1	0.37	0.36	0.1	1.23	-0.42	0.58	0.16	0.28	-0.4	0.13	-0.37	0.31	0.22
YER125W	RSP5	-0.27	-0.01	-0.15	0.83	-0.27	-0.07	-0.2	-0.13	-0.13	-0.8	0.03	0.04	-0.16
YER126C	NSA2	0.24	-0.01	0.03	1.2	-0.62	0.08	0.08	0.15	0.08	0.04	-0.05	-0.03	-0.32
YER127W	LCP5	0.34	0.18	0.27	0.88	-0.33	0.2	0.45	-0.01	0.14	0.37	0.27	0.15	-0.07
YER128W	YER128W	-0.02	-0.09	0.04	1.15	-0.16	0	0.36	-0.05	0.27	-0.11	-0.43	0.2	-0.33
YER129W	YER129W	0.22	0.01	-0.06	0.79	-0.04	0	0.03	0.11	-0.1	-0.11	0.18	-0.35	0.18
YER130C	YER130C	-0.02	0.04	0.03	1.18	-0.05	0.32	-0.06	-0.16	0.27	-0.16	-0.15	-0.21	0.53
YER131W	RPS26B	0.02	-0.41	-0.1	0.5	-0.54	0.02	-0.06	-0.03	-0.53	-0.31	0.1	-0.4	0.09
YER132C	PMD1	0.15	-0.09	-0.05	0.73	0.17	-0.19	0.07	0.14	0.61	0.33	0.2	-0.22	0.75
YER133W	GLC7	0.16	-0.25	0.04	0.95	0.07	-0.11	0.08	-0.17	0.17	0.4	-0.06	-0.18	-0.52
YER134C	YER134C	-0.03	-0.33	-0.12	1.09	-0.12	-0.02	-0.14	-0.01	-0.28	0.18	-0.3	0.13	0.18
YER135C	YER135C										-1.01			-0.11
YER136W	GDI1	-0.08	-0.17	-0.18	0.83	0.2	-0.11	0.01	-0.02	0.2	-0.8	0.19	-0.22	-0.31
YER137C	YER137C	0.1	0.29	-0.05	0.65	-0.48	-0.06	0.33	0.1	-0.15	0.47	-0.06	0.15	-0.07
YER138W-A	YER138W-A	0.1	-0.33	-0.65	0.75	0.85	-0.67	-0.16	0.17	1.48	-0.77	0.24	-0.25	-0.56
YER139C	YER139C	0.01	-0.04	0.13	1.25	-0.19	-0.09	-0.11	-0.26	-0.28	-0.56	-0.07	0.25	-0.45
YER140W	YER140W	-0.13	-0.05	-0.42	0.84	-0.41	-0.17	-0.18	-0.18	-0.49	-0.02	0.14	-0.23	-0.26
YER141W	COX15	0.12	0.37	0.23	1.69	0.35	0.29	0.32	0.27	-0.48	0.1	0.31	0.57	-0.16
YER142C	MAG1	0.06	0.09	1.12	0.76	0.73	0.38	0.56	0.65	1.04	0.18	-0.2	0.5	-0.16
YER143W	DDI1	-0.07	0.11	0.26	0.94	0.15	0.18	0.21	0.29	-0.04	0.08	0.22	0.25	-0.23
YER144C	UBP5	-0.01	0.21	0.09	0.96	0.41	0.04	0.16	0.11	0.56	-0.04	0.03	0.48	-0.12
YER145C	FTR1	-0.29	0.1	-0.17	1.35	-0.08	-0.04	-0.46	0.02	-0.1	-0.26	0.98	-0.23	0.07
YER146W	LSM5	0.07	-0.29	-0.16	0.9	0.19	-0.11	-0.13	-0.15	-0.49	-0.27	-0.28	-0.3	-0.12
YER147C	SCC4	0.1	0.06	-0.17	0.94	-0.12	0	-0.12	0.05	-0.07	0.36	-0.05	-0.11	-0.1
YER148W	SPT15	0.05	-0.05	-0.11	0.75	-0.41	0	-0.15	-0.04	-0.22	0.02	-0.17	-0.49	-0.51
YER149C	PEA2	0.04	0.04	-0.05	1	-0.1	0.11	0.17	-0.06	-0.32	0.3	-0.28	-0.19	-0.31
YER150W	SPI1	-0.11	0.12	-0.2	1.85	0.05	0.03	0.12	0.2	0.01	1.58	0.08	0.82	1.1
YER151C	UBP3	-0.01	0.02	0.09	0.17	0.09	-0.17	0.25	-0.02	0.04	-0.49	0.42	-0.4	-0.72
YER152C	YER152C	-0.1	0.01	-0.35	0.81	-0.07	-0.07	-0.14	-0.03	-0.11	0.21	0.3	0.05	-0.02
YER153C	PET122	0.11	0.2	0.34	0.33	0.33	0.36	0.32	0.84	0.34	-0.47	-0.11	0.05	0.26
YER154W	OXA1	-0.21	0.07	-0.21	0.07	0.11	-0.27	-0.16	-0.07	-0.14	0.39	0.02	0.1	-0.21
YER155C	BEM2	-0.03	0.06	-0.08	0.6	-0.16	-0.2	0.06	-0.13	0.1	-0.47	-0.04	-0.32	-0.11
YER156C	YER156C	0.18	-0.03	-0.18	0.55	-0.38	-0.04	-0.34	0.25	-0.6	-0.07	0.02	-0.44	0.08
YER157W	COG3	0.08	0.03	-0.16	0.59	0.01	-0.1	-0.05	-0.13	0.05	-0.44	-0.24	-0.36	0.08
YER158C	YER158C	-0.01	-0.15	-0.46	1.29	-0.09	-0.05	-0.95	-0.15	-0.19	0.35	-0.19	0.53	0.69
YER159C	BUR6	-0.08	0	0.44	1.21	-0.27	0.01	0.15	-0.32	0.17	-0.94	0.31	-0.25	-0.28
YER161C	SPT2	-0.07	-0.02	-0.17	1.2	0.12	-0.18	0.08	-0.36	0.13	-0.55	-0.18	-0.39	-0.53
YER162C	RAD4	0.09	0.02	0.08	1.11	0.01	-0.03	-0.09	-0.06	-0.23	0.22	-0.08	0.24	-0.25
YER163C	YER163C	0.12	-0.07	0.25	0.99	0.29	0.39	0.22	0.36	0.47	0.3	-0.08	0.5	0.31
YER164W	CHD1	-0.06	-0.01	-0.03	0.16	-0.22	-0.35	-0.01	-0.25	-0.31	-0.34	0.01	-0.45	-0.33
YER165W	PAB1	-0.06	-0.15	-0.22	-0.05	-0.2	-0.16	-0.35	-0.09	-0.39	-0.72	-0.11	-0.34	-0.03
YER166W	DNF1	-0.26	0.12	-0.21	0.34	-0.1	-0.2	-0.19	-0.31	-0.23	-0.53	0.06	-0.24	0.35
YER167W	BCK2	0.13	-0.04	-0.08	0.45	-0.1	0.12	-0.14	-0.13	0.34	-0.49	0.01	-0.27	0.17
YER168C	CCA1	-0.02	-0.23	-0.16	0.72	-0.01	-0.08	-0.04	0	-0.13	-0.13	0.12	-0.31	-0.35
YER169W	RPH1	0	0.13	0.35	0.64	-0.21	-0.26	0.17	-0.27	0.05	-0.13	0.11	0.16	0.2
YER170W	ADK2	-0.04	0	-0.03	0.75	-0.47	-0.08	-0.21			0.52	-0.14	-0.47	-0.43
YER171W	RAD3	0.09	-0.11	-0.11	0.66	-0.22	-0.03	0.02	0.06	-0.13	0.13	0.31	-0.33	-0.22
YER172C	BRR2	0.11	0.43	-0.09	0.82	-0.06	0.09	0	-0.05	-0.12	-0.22	0.42	-0.01	-0.2
YER173W	RAD24	0.08	-0.21	0.12	0.99	-0.05	0.19	0.01	0.17	0.03	0.04	0.21	-0.22	0.33
YER174C	GRX4	0.2	-0.05	-0.33	0.93	-0.48	-0.07	-0.3	0.1	-1.56	0.45	-0.21	-0.45	0.1
YER175C	TMT1	-0.01	0.15	-0.24	3.71	-0.43	0.08	-0.36	-0.17	1.38	-0.61	-0.02	-0.02	-0.4
YER176W	ECM32	-0.09	0.1	0.12	1.22	0.01	-0.04	0.1	-0.46	0.01	-0.43	0.17	-0.51	-0.53
YER177W	BMH1	-0.08	0.03	0.11	0.57	0.16	-0.04	0.03	-0.14	-0.16	0.15	0.05	-0.01	0.26
YER178W	PDA1	-0.06	0.16	-0.02	2.25	0.11	-0.12	0.06	-0.03	-0.15	0.27	0.13	0.47	0.25
YER179W	DMC1	0.16	-0.18	0.33	0.8	0.56	0.56	-0.51	0.16	0.09	0.54	0.36	0.19	0.53
YER180C	ISC10	-0.01	0.07	0.05	0.79	-0.39	-0.06	-0.16	-0.11	-0.1	-0.31	-0.22	-0.53	-0.08
YER181C	YER181C
YER182W	YER182W	0.19	0.09	0.36	1.15	-0.08	0.35	0.23	0.64	-0.45	1.31	0.21	0.6	0.24
YER183C	FAU1	-0.02	-0.1	0.02	0.79	-0.41	-0.05	-0.07	0	-0.39	-0.41	-0.52	-0.12	0.12
YER184C	YER184C	-0.15	0.34	0.06	0.97	-0.06	0.05	-0.05	-0.33	0.4	-0.31	0.51	0.36	-0.05
YER185W	YER185W	0.18	0.12	-0.29	2.21	0.18	-0.13	-0.1	0.57	0.91	0.49	0.66	0.45	-0.62
YER186C	YER186C	-0.17	-0.19	-0.26	0.63	-0.6	-0.19	-0.18	0.09	-0.38	-0.26	-0.22	-0.42	-0.58
YER186W-A	YER186W-A										0.2	-0.03		0.73
YER187W	YER187W	-0.18	-0.31	-0.29	0.89	-0.36		-0.26		0.16	0.3	0.33	-0.15	0.81
YER188W	YER188W	-0.17	-0.04	-0.68	1	-0.44	-0.74	0.1	-0.49	-0.12	-0.43	-0.64	0.07	0.26
YER189W	YER189W	-0.13	0.28	0.07	-0.04	-0.1	-0.42	-0.19	-0.3	0.15	-0.25	-0.75	-0.6	-0.27
YER190W	YRF1-2	-0.1	0.33	0.11	-0.38	0.55	-0.03	0.02	-0.29	0.22	0.59	0.11	-0.08	0.64
YFL001W	DEG1	0.2	0.01	0.08	-0.25	-0.26	0.1	0.07	0.06	-0.55	0.59	0.21	-0.22	0.09
YFL002C	SPB4	-0.05	-0.04	-0.02	-0.23	-0.28	-0.14	0.08	-0.16	-0.25	0.22	-0.13	-0.22	-0.4
YFL003C	MSH4										-0.15	0.31		1.19
YFL004W	VTC2	-0.04	0.02	0.1	0.13	-0.32	-0.3	-1.02	-0.47	0.19	-1.21	-0.8	-1.34	-1.04
YFL005W	SEC4	0.05	0	0.17	0.26	0.01	0.13	0.04	0.02	-0.04	0.48	-0.42	0.17	0.13
YFL006W	YFL006W	-0.14	0.1	0.17	-0.96	-0.03	-0.08	-0.05	0.06	-0.13	-0.08	0.17	-0.1	-0.44
YFL007W	BLM3	-0.11	0.24	0.14	-1.02	0.03	-0.06	0.06	0.07	-0.08	-0.33	0.29	-0.13	-0.95
YFL008W	SMC1	-0.09	-0.04	0.15	0.09	-0.4	0.12	-0.15	-0.22	-0.14	-0.12	0.06	-0.39	-0.01
YFL009W	CDC4	-0.13	0.1	-0.09	-0.08	0.08	0	-0.12	0.04	0.1	0.15	0.03	0.09	-0.38
YFL010C	WWM1	0.09	-0.03	-0.01	0.14	0.31	0	0.07	0.05	0.12	0.28	0.12	0.13	0.24
YFL010W-A	AUA1	0.12	-0.05	0	0.17	-0.18	0.27	0.11	0.15	0.11	-0.23	-0.26	0.47	-0.02
YFL011W	HXT10				0.02						1.07	0.13		0.42
YFL012W	YFL012W							-0.18			-0.55	1.01		1.04
YFL012W-A	YFL012W-A										-1.44
YFL013C	IES1	-0.07	0.06	0.06	0.13	-0.29	-0.15	0.08	-0.26	-0.24	-0.44	0.21	-0.29	-0.45
YFL014W	HSP12	0.79	1.47	3.82		0.22	1.17	0.32		1.47	2.35	-0.29	2.58	1.18
YFL015C	YFL015C				0.09						1.02	-1.57		0.75
YFL016C	MDJ1	-0.32	0.15	0.3	-0.31	1.24	0.31	0.14	0.11	-0.38	0.4	-0.06	0.44	-0.35
YFL017C	GNA1	-0.09	-0.23	-0.12	-0.15	-0.11	-0.09	0.13	0.18	-0.45	-0.02	-0.06	-0.28	0.02
YFL017W-A	SMX2	0.03	-0.23	0.06	-0.1	-0.09	-0.02	-0.01	0.08	-0.3	0.25	0.16	0.16	0.1
YFL018C	LPD1	-0.04	-0.16	-0.07	0.06	-0.04	-0.07	-0.1	-0.01	-0.43	-0.18	0.27	-0.14	-0.34
YFL019C	YFL019C										-0.91	-0.74		-1.02
YFL020C	PAU5	0.11	0.34	-0.2	0.62	0.49	0.04	0.1	0.08	0.92	-0.21	0.29	0.28	0.48
YFL021W	GAT1	-0.19	-0.18	-0.21	0.62	-0.15	-0.4	-0.21	-0.29	0.07	-0.17	-0.56	-0.47	-0.2
YFL022C	FRS2	-0.11	-0.14	-0.22	-0.58	-0.32	-0.2	-0.34	-0.23	-0.3	-0.7	0	-0.58	-0.66
YFL023W	BUD27	-0.01	0.21	0.46	-0.19	-0.1	-0.14	0.49	-0.22	-0.28	0.22	0.53	-0.33	-0.83
YFL024C	EPL1	0.09	0.06	0.05	0.23	-0.03	-0.04	0.19	-0.1	-0.26	-0.04	0.2	-0.04	0.23
YFL025C	BST1	-0.28	-0.03	-0.47	0.01	-0.16	-0.31	-0.05	-0.04	0.26	-0.54	-0.03	-0.17	-0.06
YFL026W	STE2	-0.03	0.03	-0.82	-0.11	-1.33	-0.53	-0.07	-0.37	-0.22	-0.23	-0.37	1.2	-0.82
YFL027C	GYP8	0.17	0.09	0.07	-0.15	-0.28	0	0.12	0.1	0.19	0.16	-0.32	0.39	-0.34
YFL028C	CAF16	0.03	-0.26	-0.06	0.4	-0.3	0.02	-0.2	0.23	-0.03	0.2	-0.1	-0.14	-0.13
YFL029C	CAK1	-0.05	-0.2	0.12	-0.24	0	-0.05	0.09	0.1	0.03	0.04	-0.1	-0.11	0.16
YFL030W	AGX1	0.02	0.01	-0.08	0.7	0.03	0.31	-0.55	0.99	-0.75	0.96	0.1	1.69	0.07
YFL031W	HAC1	-0.07	0.07	-0.01	0.24	-0.21	0.16	-0.25	0.01	0.16	-1.93	0.47	0	-0.01
YFL032W	YFL032W										0.2			-1.36
YFL033C	RIM15	0.08	0.14	0.24	0.17	0.25	0.24	0.11	0.49	1.9	0.18	0.03	0.49	0.57
YFL034C-A	RPL22B	0.04	0.05	-0.02	-0.45	-0.32	-0.17	-0.18	-0.05	-0.62	-0.1	-0.47	-0.07	-0.45
YFL034C-B	MOB2	0.08	-0.07	0.03	-0.26	-0.04	-0.04	-0.1	0.07	-0.05	0.55	0.07	-0.45	0.21
YFL034W	YFL034W	0.18	0.11	0.02	-0.29	0.12	0.02	0.05	-0.34	-0.29	-0.08	0.26	-0.34	-0.36
YFL036W	RPO41	-0.15	0.2	0.29	-0.15	0.08	0.22	-0.06	0.48	0.01	0.36	-0.04	0.3	0.06
YFL037W	TUB2	-0.06	0.24	0.26	-0.04	0.17	-0.06	0.12	-0.09	-0.09	0.22	0.13	0.04	0.19
YFL038C	YPT1	0.04	-0.1	0.25	0.13	0.13	0.2	0.02	-0.06	-0.17	-0.04	-0.06	-0.15	0.15
YFL039C	ACT1	0.07	0.15	0.21	0.86	0.3	0.15	0.1	0.03	0.37	-0.3	0	0.66	0.6
YFL040W	YFL040W										0.58	0.06
YFL041W	FET5	0	0.28	-0.33	0.04	-0.15	0.04	0.21	0.26	-0.71	0.57	0.39	0.53	0.03
YFL042C	YFL042C	-0.2	0.15	0.09	0.42	0.34	0.18	-0.04	0.31	0	-0.21	0.09	0.28	-0.36
YFL044C	YFL044C	-0.23	0.21	0.34	-0.7	-0.02	-0.22	-0.16	0.12	-0.17	0.18	0.04	-0.03	-0.46
YFL045C	SEC53	0.21	-0.05	-0.38	0.05	0.02	-0.04	-0.19	0.31	-0.22	-0.51	-0.22	-0.09	0.22
YFL046W	YFL046W	0.02	-0.16	0.07	0.55	0.19	0.08	0.04	0.03	0.32	0.2	-0.53	0.19	-0.07
YFL047W	RGD2	0.03	-0.09	-0.11	-0.1	-0.29	0	0.04	-0.28	-0.32	-0.11	-0.03	0.28	-0.56
YFL048C	EMP47	-0.06	-0.23	-0.22	0.03	-0.12	-0.08	0.03	-0.21	0.04	-0.1	-0.14	-0.16	-0.2
YFL049W	YFL049W	0.06	0.12	0.17	0.2	-0.05	0.2	0.18	0.03	0.42	-0.25	0.06	0.23	-0.03
YFL050C	ALR2	0.14	0.08	0.49	-0.28	-0.58	-0.17	-0.46	-0.34	0.61	-0.87	-0.52	-0.61	-0.76
YFL051C	YFL051C										-0.12	-0.39		0.1
YFL052W	YFL052W										0.06	-0.29
YFL053W	DAK2										0.25	0.5		1.39
YFL054C	YFL054C	0.03	0.15	-0.13	0.38	0.29	0.42	0.04	0.62	1.23	0	0.47	0.31	0.21
YFL055W	AGP3		0.53	0.18		0.76		-0.27		0.05	0.57	0.27	0.37	-0.39
YFL056C	AAD6	-0.03	-0.01	-0.28	0.84	-1.02	0.38	-0.81	0.03	-0.31	1.37	0.21	-0.74	0.05
YFL057C	AAD16	-0.26	-0.13	-0.34	0.88	-0.98	0.28	-0.64	0.04	-0.2	0.89	0.19	-0.8	-0.05
YFL058W	THI5	-0.21	-0.09	-0.17	0.17	-0.04	-0.05	0.62	0.84	1.09	-0.45	0.76	0.77	0.56
YFL059W	SNZ3	0.14	-0.14	0.12	-0.41	0.43	0.4	-0.21	0.85	0.3	0.75	0.84	0.87	0.49
YFL060C	SNO3	0.1	-0.14	-0.45	-0.06	-0.46	0.11	-0.04	0.48	0.02	0.13	-0.33	0.17	0.12
YFL061W	YFL061W		-0.14			0.45				0.96	-0.25	0.93	0.86	0.36
YFL062W	COS4	-0.2	-0.13	-0.3	0.25	0.38	-0.22	0.34	-0.21	0.09	0.03	0.79	0.55	0.84
YFL063W	YFL063W										-0.32	0.51		0.39
YFL064C	YFL064C	0.05	0.22	-0.15	-0.02	-0.16	-0.28	-0.23	-0.42	-0.02	-0.1	-0.44	-0.45	-0.01
YFL065C	YFL065C	0.08	0.3	0.16	-0.06	-0.04	-0.11	-0.12	-0.08	0.12	-0.45	-0.35	-0.3	-0.36
YFL066C	YFL066C	-0.2	0.2	-0.21	-0.74	0.23	-0.42	-0.38	-0.62	-0.07	-0.13	-0.2	-0.43	-1.04
YFL067W	YFL067W	-0.02	0.58	-0.09	-0.34	-0.09	0.07	-0.06	-0.04	-0.21	-0.33	0.02	-0.06	-0.33
YFL068W	YFL068W			-0.01	-0.5			0.23		0.22	-0.44	-0.08	0.09	-0.23
YFR001W	LOC1	0.41	0.08	0.11	0.47	-0.47	0.3	0.2	0.16	0.08	0.56	0.09	0.23	0.02
YFR002W	NIC96	0.12	0.16	0.25	0.11	-0.15	0.11	0.14	0.07	0.11	0.01	0.31	-0.1	-0.19
YFR003C	YPI1	-0.25	-0.21	0.53	0.4	0.27	0.25	0.01	0.22	-0.02	0.48	-0.05	0.17	0.07
YFR004W	RPN11	0.1	0.02	0.29	0.08	0.43	0.23	0.42	0.26	0.2	0.12	-0.09	0.05	0.01
YFR005C	SAD1	0.03	0.27	0	-0.12	-0.07	-0.04	0.09	0.35	-0.14	-0.63	-0.33	0	-0.33
YFR006W	YFR006W	0.16	0.05	0.26	0.48	0.24	0.44	0.33	0.33	-0.09	0.25	0.39	0.27	-0.2
YFR007W	YFR007W			0.12	-0.15	-0.22		0.28		-0.13	-0.39	0.38	0.25	-0.07
YFR008W	FAR7	-0.18	-0.42	0.07	0.38	-0.01	0.11	0.07	0.07	-0.3	0.13	-0.24	-0.13	0.04
YFR009W	GCN20	-0.03	0.15	-0.07	-0.15	-0.36	-0.1	0.07	-0.03	0.15	-0.46	0.09	0.07	0.32
YFR010W	UBP6	-0.16	-0.07	0.14	0.12	0.04	0.09	0.12	-0.11	0.31	0.05	0.13	-0.11	-0.38
YFR011C	YFR011C	0.09	0.23	0.15	0.31	0.01	0.32	0.17	0.24	-1.16	0.77	-0.35	0.57	-0.52
YFR012W	YFR012W										1	0.87		-0.59
YFR012W-A	YFR012W-A										0.29	0.84		0.26
YFR013W	IOC3	0.03	0.11	-0.24	-0.15	-0.1	0.09	-0.03	-0.01	0.05	-0.23	0.15	-0.45	-0.71
YFR014C	CMK1	0.05	-0.23	0.09	0.06	0.28	0.15	-0.06	0.05	-0.36	0.44	0.26	0.08	-0.32
YFR015C	GSY1	-0.01	-0.11	-0.26	0.17	1	0.52	-0.57	0.42	-0.53	1.41	0.34	0.86	-0.18
YFR016C	YFR016C	-0.05	0.2	0.13	-0.13	0.2	0.1	-0.08	-0.33	0.12	-0.3	0.34	-0.2	-0.21
YFR017C	YFR017C	0.07	0.23	-0.5	0.98	0.06	0.09	-0.4	0.29	-0.69	1.02	0.36	0.13	0.81
YFR018C	YFR018C	-0.08	-0.2	-0.59	-0.07	0.39	-0.06	0.09	-0.02	0.21	-0.78	0.73	0.16	0.05
YFR019W	FAB1	-0.06	0.16	-0.07	-0.09	0.34	0.22	-0.01	0.16	0.4	-0.22	0.03	-0.05	-0.91
YFR020W	YFR020W	0.03	0.3	0.06	-0.19	0.26	0	-0.22	0.3	0.56	-0.94	0.44	-0.46	-0.49
YFR021W	ATG18	-0.02	0.2	-0.12	-0.4	0.15	-0.2	-0.17	-0.07	0.08	-0.13	-0.13	-0.07	-0.29
YFR022W	ROG3	-0.1	0.11	-0.09	0.54	0.17	0.03	0.01	-0.02	0.61	-0.14	0.06	0.38	0.63
YFR023W	PES4				-1.57						0.25	0.66		0.72
YFR024C	YFR024C	0.12	0.38	0.59	-0.22	0.65	0.26	0.36	0.31	0.08	0.28	0.17	0.45	0.33
YFR024C-A	LSB3	0.11	0.29	0.57	-0.28	0.58	0.15	0.33	0.2	0.11	0.21	0.13	0.44	0.16
YFR025C	HIS2	0.05	0.06	-0.11	0.58	-0.03	0.04	-0.1	-0.12	-0.19	-0.4	-0.19	-0.12	-0.15
YFR026C	YFR026C	0.01	0.18	-0.48	-0.39	0.27		-0.42	0.02	0.04	-0.37	0.28	-0.53	-0.19
YFR027W	ECO1	0.26	0.06	0.23	0.09	-0.18	0.23	0.24	0.08	-0.25	0.49	-0.11	0	-0.24
YFR028C	CDC14	-0.13	0.03	-0.25	-0.56	-0.07	-0.17	0.02	-0.2	-0.35	-0.07	-0.1	-0.32	-0.36
YFR029W	PTR3	-0.06	-0.01	-0.18	-0.15	0.07	-0.14	-0.17	0.07	-0.25	-0.25	-0.15	-0.24	-0.19
YFR030W	MET10	-0.47	0.05	-0.57	0.78	0.58	0.22	-0.77	-0.47	-0.62	0.37	-0.58	0.36	-0.8
YFR031C	SMC2	0.02	0.18	0.32	0.23	-0.01	0.13	0.14	-0.18	0.34	0.22	0.05	-0.27	-0.14
YFR031C-A	RPL2A	0.16	0.13	0.02	-0.24	0.07	0.62	0.19	0.15	-0.03	-0.15	0.24	0.16	0.2
YFR032C	YFR032C										0.37	1.01		-0.49
YFR032C-A	RPL29	0.14	-0.11	0.12	-0.24	0.07	0.1	0.09	0.14	-0.19	0.25	0.02	-0.12	0.47
YFR033C	QCR6	-0.01	0.02	0.38	0.32	0.02	0.19	0.14	0.2	-0.78	-0.02	0.15	0.45	-0.07
YFR034C	PHO4	0.14	0.48	-0.06	-0.34	0.33	-0.11	0.15	-0.34	-0.56	0.01	-0.14	-0.43	-0.6
YFR035C	YFR035C	-0.06		0.26						0.05	-0.68	-0.56	0.21	0.13
YFR036W	CDC26		-0.09	-0.07		0.07		0.01		-0.27	-0.2	-0.37	-0.2	-0.1
YFR037C	RSC8	0.07	0.08	0.38	-0.18	-0.09	0.1	0.22	-0.29	-0.27	0.47	-0.04	-0.2	-0.54
YFR038W	YFR038W	-0.02	-0.15	0.01	-0.53	-0.4	-0.18	-0.01	-0.19	-0.35	-0.53	0.3	-0.24	-0.75
YFR039C	YFR039C	-0.04	-0.21	-0.22	0.23	0.21	-0.17	-0.01	-0.05	0	0.31	-0.08	-0.45	-0.27
YFR040W	SAP155	0.02	0.07	-0.11	-0.28	-0.05	-0.11	-0.11	-0.13	-0.05	-0.38	-0.16	-0.55	-0.46
YFR041C	ERJ5	0.03	-0.36	-0.47	-0.1	0.03	-0.15	-0.03	0.14	0.02	-0.2	-0.13	-0.65	-0.31
YFR042W	YFR042W	-0.04	-0.2	-0.26	0.24	0.67	0.11	0.01	0.41	0.66	0.44	-0.39	0.16	0
YFR043C	YFR043C	0.11	-0.34	-0.24	0.31	-0.17	-0.05	0.03	0.17	0.11	0.27	0.14	-0.24	0.05
YFR044C	YFR044C	0.01	-0.13	-0.01	0.83	-0.03	0.03	0.48	0.25	0.1	0.32	-0.31	0.39	-0.07
YFR045W	YFR045W	-0.17	-0.23	0.2	-0.15	0.18	0.02	-0.01	0.38	-0.15	0.36	-0.26	0.43	0.13
YFR046C	CNN1	-0.08	0.05	0.05	0.47	-0.4	0	-0.04	-0.18	-0.31	0.2	-0.06	-0.03	0.06
YFR047C	BNA6	0.08	-0.1	-0.22	0.9	0.17	-0.18	-0.04	0.08	0.38	-0.78	-0.2	-0.05	0.11
YFR048W	RMD8	0.09	-0.15	-0.15	0.15	-0.2	-0.08	0.17	0.1	-0.09	0.08	0.04	-0.15	-0.06
YFR049W	YMR31	0.11	-0.18	0.27	0.61	0.05	0.27	0.21	0.6	0.19	0.2	-0.22	0.48	0.39
YFR050C	PRE4	-0.06	0.13	0.55	-0.01	0.2	0.06	0.33	0.06	0.08	-0.11	-0.19	0.11	-0.2
YFR051C	RET2	-0.24	0.1	-0.01	-0.44	0.22	-0.15	-0.04	-0.2	-0.2	-0.01	0.44	0	0.14
YFR052W	RPN12	-0.18	-0.32	0.05	-0.19	0.15	-0.05	0.03	-0.14	0.15	-0.02	-0.04	-0.11	0.13
YFR053C	HXK1	0.12	0.46	0.4	-0.5	1.21	0.19	-0.17	0.18	-0.46	1.34	-0.08	2.33	0.13
YFR054C	YFR054C										-0.96
YFR055W	YFR055W	-0.38	0.14	-0.33	1.02	0.11	-0.56	0.83	-0.06	0.17	-0.43	0.09	0.01	-1.26
YFR056C	YFR056C										0.8	-0.07		-1.05
YFR057W	YFR057W										-0.1	0.16
YGL001C	ERG26	0	-0.02	-0.23	0.55	-0.08	-0.14	-0.15	-0.15	0.28	-1.18	-0.2	0.19	-0.06
YGL002W	ERP6	0.24	-0.02	-0.1	0.16	0.11	0.33	0.2	0.22	-0.03	0.28	-0.06	0.29	0.29
YGL003C	CDH1	0.07	0.06	-0.07	-0.27	0.05	0.02	-0.11	0.22	-0.21	0.34	0.12	0.03	-0.25
YGL004C	RPN14	-0.11	-0.15	-0.13	0.03	-0.29	-0.1	-0.21	-0.01	-0.12	-0.31	-0.17	-0.28	-0.29
YGL005C	COG7	0.06	-0.33	-0.19	0.16	-0.25	-0.08	-0.03	-0.07	-0.22	0.02	-0.19	-0.1	-0.07
YGL006W	PMC1	-0.19	0.25	0.2	0.25	0.27	-0.09	-0.23	-0.17	-0.01	0.54	0.23	0.46	0.23
YGL007W	YGL007W				-0.15						-0.23	-0.4		-0.12
YGL008C	PMA1	-0.26	0.1	-0.02	0.19	-0.03	-0.26	-0.18	-0.35	-0.1	-0.45	-0.11	-0.1	0.54
YGL009C	LEU1	-0.16	-0.52	-0.27	1.27	-0.4	-0.55	-0.38	0.23	0.34	-0.5	-0.71	-1.02	-0.68
YGL010W	YGL010W			-0.15		0.5		0.19		-0.04	-0.17	0.07	0.22	0.33
YGL011C	SCL1	0.13	0.01	0.45	0.14	0.32	0.2	0.26	0.13	0.13	0.17	0.04	-0.02	0.36
YGL012W	ERG4	-0.37	0.08	-0.28	0.71	0.07	0.04	-0.01	0.09	-0.37	0.22	-0.02	0.22	0.1
YGL013C	PDR1	-0.01	0.36	0.49	0.19	0.41	0.12	0.19	0.2	0.08	-0.07	0.35	0.05	-0.19
YGL014W	PUF4	-0.28	0.07	-0.19	-0.88	-0.33	-0.51	-0.45	-0.25	-0.09	-0.15	0.13	-0.52	-0.07
YGL015C	YGL015C										0.07	0.17		0.43
YGL016W	KAP122	0.01	0.04	-0.13	-0.32	-0.03	-0.12	0.29	0.15	-0.19	-0.48	0.57	-0.14	-0.03
YGL017W	ATE1	0.1	0.21	-0.03	-0.2	-0.08	0.1	-0.11	0.07	0.1	0.53	0.07	0.13	-0.69
YGL018C	JAC1			0.04		-0.23					-0.03	0.19		-0.12
YGL019W	CKB1	0.07	-0.06	-0.09	-0.19	-0.11	0.02	-0.07	0.06	-0.11	0.16	0.17	-0.1	0.26
YGL020C	MDM39	-0.07	-0.12	-0.33	0.09	-0.28	-0.01	-0.03	-0.12	-0.12	-0.11	0.12	-0.25	0.14
YGL021W	ALK1	0	-0.01	-0.24	-0.27	0	-0.27	0.01	-0.32	0.21	-0.3	-0.19	-0.15	-0.29
YGL022W	STT3	-0.07	0.11	0.07	-0.63	0.27	-0.11	-0.11	-0.09	-0.1	-0.06	0.32	-0.37	0.15
YGL023C	PIB2	-0.1	0.11	-0.08	-0.19	0.02	-0.1	-0.01	-0.31	-0.41	0.26	0.07	-0.33	-0.59
YGL024W	YGL024W			-0.11						0.64	0.18	-1.25		-0.74
YGL025C	PGD1	-0.06	0.02	-0.19	-0.33	-0.16	-0.32	-0.16	-0.13	-0.64	1.12	0.08	-0.34	-0.29
YGL026C	TRP5	-0.14	0.07	-0.09	1.04	0.1	-0.14	0.06	0.01	0.56	0.03	0.33	-0.15	-0.45
YGL027C	CWH41	-0.02	0.13	0	0.12	-2.62	-0.1	0.2	-0.26	0.04	-0.52	0.17	-0.45	-0.26
YGL028C	SCW11	-0.06	0.29	-0.2	-0.65	-0.48	-0.18	-0.07	-0.12	-0.84	0.42	-0.4	0.13	-0.09
YGL029W	CGR1	0.3	0.17	0.43	-0.05	-0.83	0.21	0.25	-0.1	-0.14	0.01	0.29	-0.13	0.21
YGL030W	RPL30	0.22	0.21	-0.03	0.07	0.14	0.15	0.05	0.1	-0.13	0.29	0.14	0.21	0.56
YGL031C	RPL24A	0.12	-0.16	-0.01	-0.39	-0.19	0.06	0.09	0.04	-0.02	0.1	-0.03	-0.11	-0.01
YGL032C	AGA2			0.08						0.11	0.23	-0.78	1.95	0.5
YGL033W	HOP2										-0.17	0.62		-0.15
YGL034C	YGL034C				-0.34						0.27	-1.38		0.55
YGL035C	MIG1	-0.04	0.11	-0.22	-0.39	-0.05	-0.01	-0.06	-0.22	-0.31	-0.22	0.01	-0.47	-0.16
YGL036W	YGL036W	-0.12	-0.09	0.13	-0.28	0.54	-0.04	-0.07	-0.08	0.65	-0.02	-0.22	0	0.01
YGL037C	PNC1	0.06	0.36	1.1	0	1.61	0.46	0.2	0.18	0.42	1.34	-0.48	1.19	0.65
YGL038C	OCH1	-0.05	-0.14	-0.26	-0.15	-0.05	-0.08	0.03	-0.27	-0.61	0.41	0.07	-0.34	0.2
YGL039W	YGL039W	-0.22	-0.1	-0.23	0.36	0.39	0.14	0.09	-0.18	0.26	-1.31	-0.07	-0.01	0.09
YGL040C	HEM2	-0.01	0.21	-0.02	-0.48	0.15	-0.05	0.2	0.22	-0.41	0.04	0.18	0.47	-0.51
YGL041C	YGL041C										-0.33	-0.1		0.01
YGL042C	YGL042C										-0.32	0.07		0.06
YGL043W	DST1	0.27	0.13	0.32	0.44	-0.03	0.31	0.26	0.11	0.08	-0.29	0.22	-0.06	0.02
YGL044C	RNA15	0.17	0.04	-0.05	-0.02	-0.01	-0.03	0.18	-0.06	0.09	0.16	0.29	-0.09	-0.31
YGL045W	RIM8	0.2	0.32	0.07	0.3	0.28	0.16	-0.15	-0.11	0.27	0.02	0.3	-0.01	0.33
YGL046W	YGL046W										-1.98	0.51		0.02
YGL047W	ALG13	0.08	-0.06	0.7	-0.73	0.45	0.36	0.2	0.42	0.83	0.41	-0.14	0.48	-0.1
YGL048C	RPT6	0.05	0.03	0.48	-0.13	0.1	0.19	0.57	-0.08	0.18	0.11	0.24	0.04	-0.07
YGL049C	TIF4632	-0.04	-0.14	-0.06	-0.28	-0.14	-0.15	0.06	-0.29	0.24	-0.54	0.23	-0.46	-0.41
YGL050W	YGL050W	0.18	-0.34	-0.07	-0.25	-0.21	-0.07	0.03	0.15	-0.41	0.16	0	-0.46	-0.57
YGL051W	MST27	0.09	1.01	-0.2	-0.07	-0.08	-0.31	-0.06	0.07	-0.11	0.46	0.22	-0.16	0.54
YGL052W	YGL052W				0.16						0.36	0.2		0.47
YGL053W	PRM8		0.16	0.03	0.01	0.24	0.05	0		-0.01	-0.26	0.1	0.71	-0.4
YGL054C	ERV14	-0.14	0.01	-0.14	-0.24	-0.26	-0.08	-0.16	-0.11	-0.18	-0.51	-0.29	0.03	0.11
YGL055W	OLE1	0.43	0.18	0	1.18	-0.7	0.1	0.31	0.26	0.09	-0.37	-0.05	0.35	-0.13
YGL056C	SDS23	0.17	0.26	0.28	0.18	0.2	-0.02	0.11	0.41	0.42	-0.28	0.29	0.22	0.24
YGL057C	YGL057C	-0.03	0.07	-0.2	-0.18	-0.3	-0.07	-0.14	-0.15	-0.45	-0.63	-0.29	0.3	0.1
YGL058W	RAD6	0.12	-0.1	0.14	0.01	0.01	0.06	0.05	0.07	0.29	-0.13	-0.04	-0.13	0.1
YGL059W	YGL059W	-0.01	-0.06	0	0.7	-0.16	-0.02	-0.13	-0.22	0.23	-0.04	-0.11	0.15	-0.12
YGL060W	YBP2	0.03	0.03	-0.1	-0.23	-0.18	-0.1	0.01	0.06	-0.03	-0.12	0.17	0.14	-0.17
YGL061C	DUO1	0.05	-0.14	0.06	0.29	-0.37	0.14	0.05	-0.29	-0.29	0.23	0.12	0.05	0.01
YGL062W	PYC1	-0.21	0.68	0.7	0.99	0.99	0.26	0.11	-0.11	0.95	-0.42	-0.5	0.22	-0.51
YGL063W	PUS2	-0.11	0.16	-0.28	-0.59	0.06	-0.16	-0.05	-0.1	0.07	0.16	0.48	-0.09	0.04
YGL064C	MRH4	0.13	0.2	0.13	-0.03	0.01	0.08	0.07	0.69	-0.11	-0.13	0.29	0.24	-0.59
YGL065C	ALG2	-0.15	-0.07	-0.36	-0.21	-0.11	-0.19	-0.19	-0.13	-0.26	-0.47	-0.08	-0.26	-0.2
YGL066W	SGF73	0.1	0.29	0.04	0.31	-0.17	-0.03	0.13	-0.27	0.01	-0.15	0.11	-0.29	-0.06
[truncated: 4,229 more rows]

## Sheet: YEPD (RNA)
YEPD RNA Data
YORF	NAME	Dis I/WT	Dis II/WT	Dis V/WT	Dis VIII/WT	Dis IX/WT	Dis X/WT	Dis XI/WT	Dis XII/WT	Dis XIII/WT	Dis XIV/WT	Dis XV/WT	Dis XVI/WT
YAL001C	YAL001C || TFC3 (1)	1.25	0.22	0.31	0.06	0.31	0.19	0.06	-0.41	0.17	-0.02	-0.27	0.03
YAL002W	YAL002W || VPS8 (1)	1.1	0.45	0.27	0.2	0.61	0.33	0.27	0.07	-0.16	0.17	0.04	-0.05
YAL003W	YAL003W || EFB1 (1)	1.01	0.08	-0.16	0.31	0.03	0.17	0.08	-0.4	0.29	0.22	-0.25	0.41
YAL004W	YAL004W || (1)		-0.43	-0.61	-0.08	-0.44	-0.15	-0.23		0.14	-0.23	-0.29	-0.11
YAL005C	YAL005C || SSA1 (1)	0.84	0.41	-0.1	0.4	0.34	0.16	0.19	-0.48	1.04	0.26	0.53	0.06
YAL007C	YAL007C || ERP2 (1)	0.06	-1.04	-0.88	-0.87		-1.01	-0.66	0.16	-0.14	-0.32	-0.59	1.21
YAL008W	YAL008W || FUN14 (1)	0.92	0.14	-0.15	0.03	0.05	-0.04	-0.07	0.36	0.29	0.33	0.88	0.53
YAL009W	YAL009W || SPO7 (1)	0.9	0.05	0.28	0.09		0.06		0.55	0.37	-0.01	-0.14	-0.5
YAL010C	YAL010C || MDM10 (1)	1.24	-0.05	0.34	0.31	0.31	-0.45	-0.09	0.14	-0.15	0.27	0.12	-0.13
YAL011W	YAL011W || SWC3 (1)	0.55	-0.56	-0.3	-0.39	-0.65	-0.81	-0.52	-0.77	-0.1	-0.32	-0.76	-0.72
YAL012W	YAL012W || CYS3 (1)	0.49	-0.67	-1.04	-0.4	-0.3	-0.86	-1.09	-1.16	-0.27	0.33	0.31	-0.88
YAL013W	YAL013W || DEP1 (1)	1.05	-0.07	-0.21	-0.3	-0.23	-0.43	-0.53	-0.58	0.17	-0.07	-0.42	-0.45
YAL014C	YAL014C || SYN8 (1)	0.94	0.14	-0.04	-0.2	0.19	-0.21	-0.23	-0.44	-0.5	-0.61	-0.47	1.06
YAL015C	YAL015C || NTG1 (1)	0.7	0.03	-0.01	0.11	0.25	-0.1	0.17	0.32	-0.34	0.26	0.08	-0.13
YAL016W	YAL016W || TPD3 (1)	1.1	0.21	0.35	0.1	0.06	0.14	0.05	0.03	-0.05	0.33	0.04	-0.11
YAL017W	YAL017W || PSK1 (1)	0.62	-0.15	-0.43	-0.47	-0.26	0.21	-0.07	-0.17	0.31	0.36	0.67	-0.06
YAL018C	YAL018C || (1)									-0.08	1.21	1.01	0.83
YAL019W	YAL019W || FUN30 (1)	0.96	-0.07	-0.15	0.03	0.13	0.02	-0.1	-0.01	-0.15	-0.19	-0.59	-0.39
YAL020C	YAL020C || ATS1 (1)	0.7	-0.35	-0.14	-0.24	-0.27	-0.49	-0.45	-0.45	-0.2	-0.29	-0.09	-1.12
YAL021C	YAL021C || CCR4 (1)	1.26	0.49	0.29	0.23	0.16	-0.21	-0.06	-0.64	0.14	-0.46	-0.39	0.82
YAL022C	YAL022C || FUN26 (1)	0.87	-0.09	0.15	-0.13	-0.06	0.03	-0.11	-0.2	0.07	0.38	0.05	-0.33
YAL023C	YAL023C || PMT2 (1)	1.11	-0.11	-0.14	0.21	0.03	-0.22	0.17	-0.12	0.05	-0.53	-0.62	-0.22
YAL024C	YAL024C || LTE1 (1)	1	0	-0.06	-0.08	-0.33	-0.21	-0.21	0.22	-0.08	-0.2	-0.32	0.58
YAL025C	YAL025C || MAK16 (1)	0.93	-0.04	-0.13	0.1	-0.26	0.11	-0.03	-0.01	0.09	-0.31	-0.74	-0.45
YAL026C	YAL026C || DRS2 (1)	0.87	0.17	0.04	0.22	-0.25	0.07	0.1	-0.08	-0.03	0.11	-0.21	0.2
YAL027W	YAL027W || (1)	0.9	0.18	0.25	0.15	-0.02	0.32	0.18	0.2	0.01	0.11	-0.17	-0.1
YAL028W	YAL028W || FRT2 (1)									-0.21	0.29	0.95	-0.51
YAL029C	YAL029C || MYO4 (1)	0.98	0.18	0.12	0.18	0.23	0.45	0.43	0.15	-0.35	-0.02	-0.24	-0.23
YAL030W	YAL030W || SNC1 (1)	1.11	0.45	0.04	0.04	0.38	0.43	0.17	-0.48	-0.21	0.24	0.48	0.56
YAL031C	YAL031C || (1)	0.98	-0.04	-0.06	-0.26	-0.11	-0.48	-0.72	-0.77	-0.18	-0.34	-0.01	-0.24
YAL032C	YAL032C || PRP45 (1)	0.89	-0.07	-0.05	-0.17	-0.14	-0.29	-0.18	-0.34	0.23	-0.13	-0.25	-0.21
YAL033W	YAL033W || POP5 (1)	1.03	0.31	0.65	0.14	-0.04	0.47	0.19	0.02	-0.27	-0.45	-0.33	-0.09
YAL034C	YAL034C || FUN19 (1)	1.08	0.35	0.1	0.18	0.26	0.04	-0.19	0.11	0.26	0.27	0.23	-0.25
YAL034C-B	YAL034C-B || (1)									0.2			-0.34
YAL034W-A	YAL034W-A || MTW1 (1)			0.29						-0.27	-0.06	0.05	-0.08
YAL035W	YAL035W || FUN12 (1)	0.89	-0.05	-0.27	0.02	-0.09	-0.04	-0.1	-0.32	0.13	0.1	-0.33	-0.61
YAL036C	YAL036C || RBG1 (1)	0.69	-0.15	-0.31	-0.19	-0.28	-0.26	-0.18	0.13	-0.35	-0.29	-0.52	-0.38
YAL037W	YAL037W || (1)	0.48	-0.22	0.12	-0.11	-0.3	-0.31	-0.06	0.78	-0.23	0.16	-0.02	0.64
YAL038W	YAL038W || CDC19 (1)	0.52	-0.37	-0.6	-0.3	-0.23	-0.6	-0.51	-0.04	0.33	-0.24	-0.29	0.18
YAL039C	YAL039C || CYC3 (1)	0.73	-0.27	-0.57	-0.42	-0.05	-0.78	-0.05	-0.01	-0.08	-0.51	0.76	-0.43
YAL040C	YAL040C || CLN3 (1)	0.63	0.32	-0.4	0.08	0.04	-0.02	-0.2	-0.13	0.15	-0.29	0.18	0.04
YAL041W	YAL041W || CDC24 (1)	0.54	-0.57	-0.4	-0.56	-0.52	-0.4	-0.57	-0.02	-0.16	-0.3	-0.45	-0.31
YAL042C-A	YAL042C-A || (1)	1.16	0.49	0.62	0.9	0.19	0.6	0.51	0.03	0.03	0.63	0.33	0.13
YAL042W	YAL042W || ERV46 (1)	0.9	0.04	0.01	0	0.06	0.11	0.09	-0.26	0.25	0.2	0.07	-0.17
YAL043C	YAL043C || PTA1 (1)	0.72	0.01	-0.22	-0.19	0.13	-0.24	-0.27	-0.53	-0.21	-0.12	-0.48	-0.6
YAL044C	YAL044C || GCV3 (1)	1.16	0.2	0.74	-0.03	0.56	0.07	1.04	-0.03	-0.17	0.77	0.82	1.18
YAL044W-A	YAL044W-A || (1)	0.69	0.04	-0.09	-0.12	-0.06	0.01	-0.03	0.3	0.02	-0.27	-0.01	-0.12
YAL045C	YAL045C || (1)	-0.59	-0.9	-0.83	-0.88	-0.94	-0.72	-0.85		-0.24	-0.08	0.12	-0.35
YAL046C	YAL046C || (1)	0.47	-0.28	-0.47	-0.39	-0.29	-0.33	-0.12	-0.21	0.1	-0.22	0.12	-0.12
YAL047C	YAL047C || SPC72 (1)	0.3	-0.53	-0.47	-0.48	-0.38	-0.51	-0.56	-0.19	-0.18	-0.13	-0.46	-0.5
YAL048C	YAL048C || GEM1 (1)	1.78	1.41	1.19	0.89	1.98	1.49	1.44	0.02	0.29	0.18	-0.19	0.55
YAL049C	YAL049C || (1)	0.72	-0.21	-0.28	-0.22	-0.21	-0.22	-0.29	-0.17	-0.05	-0.22	0.14	0.26
YAL051W	YAL051W || OAF1 (1)	0.83	0.04	-0.09	-0.2	0.02	-0.09	-0.29	-0.21	-0.05	-0.51	-0.38	0
YAL053W	YAL053W || (1)	0.79	0.64	0.04	0.31	0.1	0.22	0.34	0.57	-0.25	0.42	0.86	0.44
YAL054C	YAL054C || ACS1 (1)	0.86	0.15	-0.24	0.05	0	-0.32	0.01	0.53	0.09	-0.04	0.8	1.07
YAL055W	YAL055W || PEX22 (1)	0.94	0.09	-0.26	-0.12	-0.1	-0.13	-0.06	0.03	0	0.26	0.45	0.16
YAL056C-A	YAL056C-A || (1)	-0.31	-1.27	-1.3	-1.25	-1.32	-1.12	-1.17		0.24			-0.23
YAL056W	YAL056W || GPB2 (1)	1.12	0.2	0.15	0.06	0.16	0.12	0.05	0.29	0.22	-0.2	0.04	-0.17
YAL058W	YAL058W || CNE1 (1)	0.16	-0.52	-0.65	-0.43	-0.55	-0.78	-0.56	-0.28	-0.12	-0.13	-0.33	-0.71
YAL059W	YAL059W || ECM1 (1)	0.47	-0.52	-0.65	-0.4	-0.62	-0.26	-0.26	0.24	-0.13	-0.45	-0.84	-0.18
YAL060W	YAL060W || BDH1 (1)	0.63	-0.32	0.34	-0.58	-0.12	-0.59	0.14	0.24	0.39	0.06	0.81	-0.21
YAL061W	YAL061W || (1)	1.04	0.1	-0.86	-0.68	0.52	-0.62	-0.51	-0.73	1.4	0.84	1.11	0.04
YAL062W	YAL062W || GDH3 (1)	0.53	-0.39	-0.68	-0.19	0.45	-0.84	-0.54	0.58	-0.28	0.23	1.33	-0.77
YAL063C	YAL063C || FLO9 (1)	-0.31		-0.48	-0.19			-0.26	-0.35	0.52	-0.09	0.24	-0.1
YAL064C-A	YAL064C-A || (1)									0.18	-0.05		0.58
YAL064W	YAL064W || (1)		0.07	-0.28	0.6				1.1	0.12	-0.17	0.12	0.01
YAL064W-B	YAL064W-B || (1)		-0.15	-0.52	0.27					-0.26	-0.02	0.66	0.65
YAL065C	YAL065C || (1)									0.16
YAL067C	YAL067C || SEO1 (1)	1.01	-0.2	0.06	1.05	0.02	-0.28	-0.03	0.42	-0.08	0.77	0.86	-0.65
YAL068C	YAL068C || (1)	-0.36	-0.46	0.06	-0.05	-0.2	-0.1	-0.85	0.1	-0.09	0.33	0.07	-0.2
YAL069W	YAL069W || (1)	0.1	-0.06	-0.32	0.09	0.13	0.05	-0.07	-0.76	-0.1	-0.24	0.11	0.41
YAR002C-A	YAR002C-A || ERP1 (1)	1.16	0.37	0.41	0.59	0.25	0.53	0.7	0.16	-0.76	-0.12	-0.32	0.78
YAR002W	YAR002W || NUP60 (1)	0.58	-0.28	-0.39	-0.25	-0.31	-0.32	-0.42	-0.26	-0.29	-0.38	-0.67	-0.24
YAR003W	YAR003W || SWD1 (1)	0.61	-0.4	-0.2	-0.24	-0.52	-0.22	-0.1	0.93	-0.17	-0.4	-0.29	0.17
YAR007C	YAR007C || RFA1 (1)	1.21	0.35	0.14	0.18	0.29	0.17	0.12	-0.42	-0.12	-0.07	-0.19	0.2
YAR008W	YAR008W || SEN34 (1)	1.03	0.05	0.07	0.01	0.04	0.08	0.06	-0.06	-0.18	-0.33	-0.31	-0.12
YAR014C	YAR014C || BUD14 (1)	1.09	0.04	0.25	0.13	0.12	0.09	0.23	-0.16	-0.02	0.18	-0.11	-0.09
YAR018C	YAR018C || KIN3 (1)	1.18	0.26	0.39	0.39	-0.04	0.42	-0.09	-0.18	-0.46	-0.02	-0.19	-0.57
YAR019C	YAR019C || CDC15 (1)	0.4	-0.63	-0.28	-0.19	-0.35	-0.44	-0.24	-0.48	-0.15	-0.13	0.05	-0.13
YAR020C	YAR020C || PAU7 (1)	0.94	0.2	0.29	0.31	0.14	0.07	0.17	0.28	-0.12	0.3	0.77	0.33
YAR023C	YAR023C || (1)	0.82	0.34	0.1	-0.11	0.56	0.11	0.17	0.38	-0.4	-0.16	0.04	-0.39
YAR027W	YAR027W || UIP3 (1)	0.71	-0.25	0	0.13	0.2	0.23	-0.05	0.47	0	0.73	0.21	0.21
YAR028W	YAR028W || (1)			0.65	0					-0.45	0.18	-0.24	0.06
YAR029W	YAR029W || (1)	0.96	0.35	0.56	0.07	0.09	0.32	0.34	0.3	-0.52	-0.15	-0.7	0.16
YAR030C	YAR030C || (1)	-0.22	-0.64	-0.38	-0.64	-0.78	-0.54	-0.67	-0.1	0.32	0.04	0.2	0.01
YAR031W	YAR031W || PRM9 (1)									-1.25	0.29	-1.17	0.39
YAR033W	YAR033W || MST28 (1)		1.17	1.28	0.86		1.5			0.08	0.33	-0.25	0.22
YAR035W	YAR035W || YAT1 (1)	0.61	-0.21	-0.18	0.22	0.27	0.31	0.39	-0.44	-0.11	0.61	1.32	0.4
YAR042W	YAR042W || SWH1 (1)			0.56						0.04	0.22	0.24	0.64
YAR044W	YAR044W || (1)	0.64	-0.4	-0.21	-0.2	-0.09	-0.35	-0.28	-0.1	-0.38	-0.25	-0.2	-0.54
YAR050W	YAR050W || FLO1 (1)	0.38	-0.05	-0.23	0.22	-0.04	0.08	-0.08	-0.16	-0.34	-0.01	0.31	-0.3
YAR053W	YAR053W || (1)	0.12	-0.24	-0.36	0.07	0.47	0.42	0.17		0.05	0.03	-0.32	0.04
YAR060C	YAR060C || (1)	0.34	-1.01	-0.54	0.2	-0.68	-0.65	-0.66	1.36	0.03	0.65	0.53	-0.28
YAR061W	YAR061W || (1)	0.04	0.12	-0.24	0.28	0.19	-0.64	-0.2		0	-0.1	-0.23	0.02
YAR062W	YAR062W || (1)	0.23	-0.55	-0.04	-0.22	-0.03	-0.51	-0.55	-0.87	0.05	-0.68	0.28	0.04
YAR064W	YAR064W || (1)	-0.72	-1.12	-1.68		-0.71	-0.92			0.05	0.2	-0.07	0.21
YAR066W	YAR066W || (1)	-0.01	-0.43	0.25	0.1		-0.22		-0.88	0.64	0.23	-1.31	-1.17
YAR068W	YAR068W || (1)	-0.17	-0.84	0.19	0.01	-0.16	-0.07	0.02	-1.04	0.29	0.46	0.97	0.27
YAR069C	YAR069C || (1)	-0.19	0.4	0.14	1.13	0.04	0.29		0.64	-0.45	-0.39	-0.65	-0.55
YAR070C	YAR070C || (1)	-0.46								-1.02	-0.59		-0.26
YAR071W	YAR071W || PHO11 (1)	-0.07	-0.27	-1.18	-0.27	-1.88	-1.79	-0.7	0.33	-3.65	-1.15	-2.28	-2.39
YAR073W	YAR073W || IMD1 (1)	0.36	-0.05	0.14	0.45	-0.01	0.24	0.4	1.76	-0.36	-0.4	-0.84	0.01
YAR075W	YAR075W || (1)	0.22	0.07	-0.17	-0.42	0.15	0.22		0.27	-1.4	-0.68	-2.2	-0.05
YBL001C	YBL001C || ECM15 (1)	-0.09	1.34	0.04	0.1	0.18	0.25	0.33	0.07	-0.19	0.18	0.76	0.72
YBL002W	YBL002W || HTB2 (1)	0.14	0.57	0.13	-0.04	0.11	-0.05	-0.12	-0.95	0.38	-0.67	-0.33	0.43
YBL003C	YBL003C || HTA2 (1)	0.38	0.63	0.48	0.13	0.19	0.34	0.13	-0.56	0.46	-0.63	-0.11	0.45
YBL004W	YBL004W || UTP20 (1)	0.21	1.13	0.03	0.35	0.48	0.34	0.38	-0.08	-0.09	-0.06	-0.25	-0.15
YBL005W	YBL005W || PDR3 (1)	-0.47	0.48	0.28	-0.18	-0.56	-0.45	-0.82	0.3	-0.23	-0.14	-0.53	0.07
YBL006C	YBL006C || LDB7 (1)	0.19	1.05	0.64	0.1	0.22	-0.07	0.23	-0.3	-0.32	-0.32	-0.54	0.18
YBL007C	YBL007C || SLA1 (1)	0.01	0.83	0.01	-0.18	-0.05	-0.45	-0.2	-0.33	0.06	0.32	0.22	-0.6
YBL008W	YBL008W || HIR1 (1)	-0.02	0.74	-0.28	-0.11	-0.15	-0.47	-0.12	-0.27	-0.24	-0.28	-0.5	-0.59
YBL009W	YBL009W || (1)	0.12	1	-0.1	-0.09	-0.26			-0.62	-0.43	-0.3	-0.4	-0.21
YBL010C	YBL010C || (1)	-0.2	0.69	0.05	-0.18	-0.17	-0.08	-0.3	-0.38	-0.08	-0.27	-0.13	-0.21
YBL011W	YBL011W || SCT1 (1)	-0.02	0.5	-0.15	-0.19	-0.07	-0.09	0.01	-0.74	0.23	0.03	-0.36	-0.13
YBL012C	YBL012C || (1)	-0.41	0.19	-0.4	-0.24	-0.19	-0.35	-0.47		0.07	-0.39	-0.64	-0.27
YBL013W	YBL013W || FMT1 (1)									0.4	0.2	0.64
YBL014C	YBL014C || RRN6 (1)	-0.14	0.57	-0.05	0.12	-0.12	-0.16	-0.06	-0.25	0.1	-0.28	-0.62	-0.28
YBL015W	YBL015W || ACH1 (1)	0.12	0.96	-0.63	-0.13	0.16	-0.28	-0.29	-0.33	0.49	-0.06	0.99	-0.42
YBL016W	YBL016W || FUS3 (1)	-0.25	0.3	-0.56	-0.44	-0.34	-0.23	-0.36	-0.32	-0.42	-0.13	0.29	-0.64
YBL017C	YBL017C || PEP1 (1)	-0.1	0.52	-0.31	-0.18	-0.1	-0.29	-0.28	-0.01	-0.08	0.12	-0.06	-0.08
YBL018C	YBL018C || POP8 (1)	-0.17	0.7	0.29	-0.05	-0.22	0.31	0.2	-0.19	-0.1	-0.59	-0.56	-0.1
YBL019W	YBL019W || APN2 (1)	-0.79	0.21	-0.71	-0.85	-0.75	-0.56	-0.53	-0.56	0.01	-0.19	-0.16	-0.49
YBL020W	YBL020W || RFT1 (1)	0.17	0.91	0.28	0.01	-0.1	0.16	0.11	0.27	-0.04	-0.31	-0.18	0.46
YBL021C	YBL021C || HAP3 (1)	-0.12	0.43	0.17	-0.24	-0.32	-0.16	0.01	-0.11	0.49	0.01	0.21	-0.38
YBL022C	YBL022C || PIM1 (1)	-0.49	0.66	-0.76	-0.6	-0.31	-0.56	-0.33	-0.47	0.42	0.1	0.32	-0.6
YBL023C	YBL023C || MCM2 (1)	0.01	0.88	-0.07	0	-0.16	-0.28	-0.06	0.03	0.03	-0.05	-0.21	-0.6
YBL024W	YBL024W || NCL1 (1)	-0.11	0.92	-0.18	-0.07	-0.04	-0.15	-0.09	-0.25	0	-0.37	-0.63	-0.09
YBL025W	YBL025W || RRN10 (1)		0.56	-0.2	-0.1			-1.05		0.1	-0.04	-0.32	-0.92
YBL026W	YBL026W || LSM2 (1)	0.4	1.36	0.51	0.39	0.34	0.73	0.52	0.03	-0.33	-0.13	0.11	0.81
YBL027W	YBL027W || RPL19B (1)	0.13	1.1	0.07	0.16	0.14	0.36	0.28	-0.06	-0.04	-0.23	-0.36	0.01
YBL028C	YBL028C || (1)	-0.04	0.53	-0.1	0.09	-0.25	0.08	0.14	-0.36	-0.58	-0.04	-0.41	0.25
YBL029C-A	YBL029C-A || (1)	0.16	1.04	0.4	0.32	0.24	0.36	0.26	0.19	0	-0.31	0.37	0.28
YBL029W	YBL029W || (1)	0.69	1.09	-0.33	-0.16		0.56	0.25	-0.23	-1.71	-1.76	-0.49	-0.03
YBL030C	YBL030C || PET9 (1)	0.38	1.18	-0.14	0.15	0.73	0.21	0.68	-0.67	0.87	0.01	1.69	0.88
YBL031W	YBL031W || SHE1 (1)	0.35	1.14	0.39	0.3	0.28	0.25	0.33	0.31	-0.29	-0.04	-0.19	1.33
YBL032W	YBL032W || HEK2 (1)	-0.03	0.81	0	-0.04	-0.11	-0.07	-0.32	-0.81	0	-0.25	-0.67	-0.22
YBL033C	YBL033C || RIB1 (1)	-0.59	0.41	-0.24	-0.41		-0.34	-0.66	0.09	-0.04	-0.11	-0.18	-0.46
YBL034C	YBL034C || STU1 (1)	0.02	0.77	-0.12	-0.1	-0.19	0	-0.09	-0.11	-0.23	-0.28	-0.32	-0.07
YBL035C	YBL035C || POL12 (1)	0.23	0.9	-0.11	-0.19	0.11	-0.35	-0.12	-0.83	-0.51	-0.35	-0.2	-0.23
YBL036C	YBL036C || (1)	-0.18	0.6	0.06	0.22	-0.21	0.07	-0.04	0.74	-0.5	0.01	-0.39	-0.09
YBL037W	YBL037W || APL3 (1)	0.19	1.06	0.4	0.13	0.24	-0.04	0.21	-0.02	0.15	0.1	0.42	-0.15
YBL038W	YBL038W || MRPL16 (1)	0.17	0.94	0.34	0.04	0.36	0.04	0.35	-0.68	0.46	-0.1	0.37	0.06
YBL039C	YBL039C || URA7 (1)	-0.38	0.36	-0.71	-0.37	-0.65	-0.25	-0.32	-0.1	-0.32	-0.66	-1.27	-0.38
YBL040C	YBL040C || ERD2 (1)	0.07	1.11	0.1	-0.03	-0.01	0.37	0.15	-0.37	0.04	0.43	0.27	0.11
YBL041W	YBL041W || PRE7 (1)	-0.19	0.95	-0.08	0.23	-0.16	0.23	0.07	0.59	-0.1	0	-0.03	0.32
YBL042C	YBL042C || FUI1 (1)	0.19	1.18	0.54	0.42	0.1	0.44	0.13	-0.18	-0.31	-0.23	-0.59	-0.51
YBL043W	YBL043W || ECM13 (1)	0.87	2.51	-0.04	-0.08	0.73	0.05	0.07	0.18	0.15	0.05	2.09	0.84
YBL044W	YBL044W || (1)	0.24	0.81	0.14	-0.18	-0.26	0	-0.34		-0.93	-0.61	-0.86	0.09
YBL045C	YBL045C || COR1 (1)	0.11	0.8	-0.58	-0.2	0.2	-0.26	0.1	-0.91	0.37	-0.28	1	-0.21
YBL046W	YBL046W || (1)	-0.17	0.76	-0.07	-0.21	-0.4	-0.28	-0.4	0.03	-0.07	0.09	-0.19	-0.32
YBL047C	YBL047C || EDE1 (1)	-0.09	0.75	-0.02	-0.13	0.09	-0.33	-0.19	-0.09	0.09	0.01	0.07	-0.38
YBL048W	YBL048W || (1)	-0.05	1.73	0.8	0.56	0.54	-0.19	0.3	1	0.25	2.31	2.64	0.37
YBL049W	YBL049W || MOH1 (1)	0.04	1.58	0.21	-0.31	0.02	-0.55	-0.14		0.34	2.38	2.68	0.62
YBL050W	YBL050W || SEC17 (1)	0.1	1.22	0.48	0.29	0.16	0.46	0.23	0.42	-0.38	-0.14	-0.25	-0.11
YBL051C	YBL051C || PIN4 (1)	0.15	0.83	0.2	0.14	0.17	0.15	0.12	-0.29	-0.3	-0.17	-0.42	0.79
YBL052C	YBL052C || SAS3 (1)	0.7	0.97	0.17	0.31	0.46	0.27	0.41	-0.24	-0.4	-0.39	-0.39	0.01
YBL053W	YBL053W || (1)	-0.38	0.38	-0.52	-0.7	-0.35	-0.42	-0.64	-1.31	-0.29	-0.14	-0.15	-0.14
YBL054W	YBL054W || (1)	-0.21	0.35	-0.21	0.38	-0.27	0.09	-0.05	0.2	0.01	-0.36	-0.76	-0.42
YBL055C	YBL055C || (1)	-0.2	0.9	0.42	0.25	-0.12	0.12	-0.07	0.24	-0.23	0.11	-0.5	-0.06
YBL056W	YBL056W || PTC3 (1)	0.22	0.89	0.26	0.01	0.01	0.05	0.05	0.02	-0.11	0	-0.22	0
YBL057C	YBL057C || PTH2 (1)	0.03	0.99	0.17	0.01	0.02	0.18	0.09	-0.02	-0.3	-0.07	-0.6	0
YBL058W	YBL058W || SHP1 (1)	-0.2	0.79	-0.44	-0.25	-0.3	-0.18	-0.37	-0.76	0.15	0.19	-0.3	-0.1
YBL059C-A	YBL059C-A || (1)	-0.02	0.89	-0.31	-0.41	-0.09	-0.16	-0.01	-0.6	0.18	-0.25	0.36	0.16
YBL059W	YBL059W || (1)	0.08	1.12	0.21	0.08	0.13	0.31	0.17	-0.24	0.14	0.19	0.89	0.35
YBL060W	YBL060W || (1)	-0.22	0.34	-0.21	-0.12	-0.24	-0.01	0.07	0.07	-0.22	-0.12	-0.15	-0.42
YBL061C	YBL061C || SKT5 (1)	0.14	0.93	0.12	0.48	0.34	0.31	0.31	0.61	-0.69	-0.31	-0.01	-0.17
YBL062W	YBL062W || (1)	-0.5	0.05	-0.48	-0.31	-0.57	-0.7	-0.45		-0.4
YBL063W	YBL063W || KIP1 (1)	-0.22	0.61	-0.36	-0.39	-0.58	-0.43	-0.44	-0.33	-0.33	-0.44	-0.58	0.52
YBL064C	YBL064C || PRX1 (1)	-0.09	1.34	-0.51	0.17	0.25	-0.1	-0.22	0.38	1.75	0.62	1.03	0.52
YBL065W	YBL065W || (1)			0.63						0.02	1.26	0.19	0.1
YBL066C	YBL066C || SEF1 (1)	0	0.86	-0.34	-0.14	0.13	-0.02	-0.1	-1.03	0.79	-0.3	0.31	-0.25
YBL067C	YBL067C || UBP13 (1)	-0.21	0.74	0.01	-0.19	-0.34	-0.25	-0.18	0.13	0.04	0.05	0	-0.21
YBL068W	YBL068W || PRS4 (1)	0.15	0.98	-0.06	-0.05	-0.2	0.05	-0.18	-0.13	-0.27	-0.37	-0.49	-0.42
YBL069W	YBL069W || AST1 (1)	-0.3	0.79	0.47	-0.36					-0.08	-0.53	-0.66	-0.78
YBL070C	YBL070C || (1)	-0.18	0.87	-0.06	0.31			0.27		-0.12	-0.73	-0.68
YBL071C	YBL071C || (1)	-0.82	-0.17	-0.72	-0.53	-0.8	-0.75	-0.55		-0.12	-0.68	-0.42	-0.55
YBL071W-A	YBL071W-A || KTI11 (1)	0.8	1.59	0.57	0.76	0.54	0.83	0.68	-1.21	-0.83	-0.28	-0.58	-0.29
YBL072C	YBL072C || RPS8A (1)	0.38	1.11	0.39	0.32	0.15	0.44	0.41	-0.34	0.09	0.17	-0.02	1.45
YBL073W	YBL073W || (1)									-0.07
YBL074C	YBL074C || AAR2 (1)									0.98	0.28	0.08	-0.03
YBL075C	YBL075C || SSA3 (1)	-0.09	0.82	-0.02	0.59	0.62	0.72	0.22	-0.11	-0.38	0.64	-0.14	-0.5
YBL076C	YBL076C || ILS1 (1)	0.05	0.67	-0.13	-0.29	-0.19	-0.24	-0.18	-0.26	-0.32	0	-0.42	-0.41
YBL077W	YBL077W || (1)	-0.37	0.44	-0.32	-0.34	-0.22	-0.24	-0.22		-0.72	-0.09	-0.56	-0.17
YBL078C	YBL078C || ATG8 (1)	0.67	2.07	1.31	0.86	1.13	0.91	0.88	0.8	0.27	1.39	2.02	0.6
YBL079W	YBL079W || NUP170 (1)	-0.03	0.95	-0.1	-0.04	-0.15	0	-0.09	-0.26	-0.3	-0.36	-0.44	-0.39
YBL080C	YBL080C || PET112 (1)	0.46	0.82	0.77	0.43	0.37		0.64	-0.41	0.45	-0.17	0.07	-0.28
YBL081W	YBL081W || (1)	-0.36	0.06	-0.66	-0.3	-0.29	-0.4	-0.54	-0.59	-0.29	-0.57	-0.94	-0.34
YBL082C	YBL082C || ALG3 (1)	0.48	1.14	0.24	0.28	0.6	0.33	0.28	0.09	-0.1	-0.1	-0.68	-0.35
YBL083C	YBL083C || (1)	0.03	0.75	0.05	-0.02	0.08	-0.11	0.01	-0.12	-0.33	-0.13	-0.6	-0.34
YBL084C	YBL084C || CDC27 (1)	0.21	1.22	0.07	0.2	0.47	0.38	-0.12	-0.25	-0.28	-0.17	-0.23	0.15
YBL085W	YBL085W || BOI1 (1)	0.16	0.91	-0.05	-0.01	0.13	-0.1	-0.05	-0.39	-0.1	-0.19	-0.44	-0.18
YBL086C	YBL086C || (1)	0.13	0.58	-0.07	-0.25		0.14			0.13	-0.11	0.07	0.05
YBL087C	YBL087C || RPL23A (1)	0.6	1.54	0.67	0.67	0.64	0.76	0.71	-0.47	-0.53	-0.39	-0.45	0.73
YBL088C	YBL088C || TEL1 (1)	-0.56	0.38	-0.43	-0.4	-0.79		-0.51	0.38	0.05	-0.24	-0.08	-0.04
YBL089W	YBL089W || AVT5 (1)	0.38	1.15	0.55	0.21	0.21	0.4	0.32	0.23	0.2	-0.27	-0.21	-0.34
YBL090W	YBL090W || MRP21 (1)	-0.11	0.9	-0.26	-0.26	-0.03	-0.15	-0.01	-0.49	0.47	0.01	0.33	-0.12
YBL091C	YBL091C || MAP2 (1)	-0.11	0.63	-0.23	-0.21	-0.21	-0.24	-0.45	-0.12	0.21	-0.17	-0.12	-0.41
YBL091C-A	YBL091C-A || SCS22 (1)	-0.14	0.93	-0.22	-0.29			-0.21	-1	-0.06	0.01	-0.11	-0.18
YBL092W	YBL092W || RPL32 (1)	-0.13	0.75	-0.2	0.09	-0.05	0.07	0.01	0.51	0.14	0.4	0.07	0.38
YBL093C	YBL093C || ROX3 (1)	-0.15	0.49	-0.16	-0.04	-0.31	-0.17	-0.11	0.27	-0.19	-0.04	-0.53	-0.5
YBL094C	YBL094C || (1)	-0.99	-0.42	-1.17	-1.27	-1.23	-1.15	-1.12		-0.16	-0.06	-0.28	0.26
YBL095W	YBL095W || (1)	-0.43	0.34	-0.32	-0.28	-0.28	-0.16	-0.29	-0.05	-0.23	-0.4	0.04	-0.43
YBL096C	YBL096C || (1)	-0.55	0.28	0.02	-0.25		-0.05			-0.44	0.32	-0.24	0.42
YBL097W	YBL097W || BRN1 (1)				0.09					0.1	-0.43	-0.66	0.15
YBL098W	YBL098W || BNA4 (1)	-0.08	0.31	-0.41	-0.07	-0.2	0.23	0.58	1.23	-0.01	0.1	0.12	0.43
YBL099W	YBL099W || ATP1 (1)	0.65	1.32	-0.14	0.14	0.59	0.24	0.5	-1.18	0.57	0.05	1.03	0.26
YBL100C	YBL100C || (1)	-0.55	-0.07	-1.23	-0.72	-0.58	-0.83	-0.66	-1.37	0.06	-0.37	0.19	-0.46
YBL101C	YBL101C || ECM21 (1)	-0.32	0.59	-0.15	-0.27	-0.25	-0.33	-0.01	0.77	0.05	0.28	0.48	0.58
YBL102W	YBL102W || SFT2 (1)	0.38	1.47	0.61	0.36	0.24	0.74	0.56	0.22	0.16	0.51	0.12	0.28
YBL103C	YBL103C || RTG3 (1)	0.25	1.09	0.35	0.28	0.3	0.06	0.35	0.06	-0.22	0.08	-0.31	-0.15
YBL104C	YBL104C || (1)	0.13	1.09	0.08	-0.02	0.17	0.02	0.02	-0.53	-0.08	-0.15	-0.56	-0.41
YBL105C	YBL105C || PKC1 (1)	0.15	0.83	-0.04	-0.14	0.35	-0.22	-0.14	-0.62	-0.06	-0.33	-0.49	-0.47
YBL106C	YBL106C || SRO77 (1)	-0.21	0.52	-0.14	0.05	-0.34	-0.07	-0.22	0.16	-0.1	0.35	0.14	-0.58
YBL107C	YBL107C || (1)	-0.54	0.89	-0.6	-0.17	-0.43	-0.22	-0.03	-0.03	-0.17	-0.18	-0.21	-0.06
YBL107W-A	YBL107W-A || (1)	-0.1	-0.46	-0.03	0.2	-0.08	0.46	0.21	0.37	-0.8	0.64	0.12	-0.94
YBL108C-A	YBL108C-A || (1)	-0.15	-0.19	0.26	0.15	-0.09	-0.17	-0.66	0.32	-0.11	0.55	0.42	0.11
YBL108W	YBL108W || (1)									-0.72	-0.38		0.01
YBL109W	YBL109W || (1)	0.16	0.14	0	0.13	0.09	-0.09	0.01	-0.24	0.07	-1.05	0.06	0.39
YBL111C	YBL111C || (1)	1.52	1.75	1	1.27	1.82	1.03	1.28	-0.79	-0.22	0.08	0.29	0.16
YBL112C	YBL112C || (1)	1.61	1.78	1.04	1.28	1.85	1.03	1.25	-0.54	0.07	0.43	0.63	0.49
YBL113C	YBL113C || (1)	-0.27	-0.28	-0.76	-0.4	-0.23	-0.6	-0.6	0.5	0.16	-0.46	0.46	0.22
YBR001C	YBR001C || NTH2 (1)	0.52	1.42	0.05	0.38	0.7	0.24	0.82	-0.48	0.44	0.58	0.64	-0.14
YBR002C	YBR002C || RER2 (1)	-0.59	0.14	-0.82	-0.49	-1.05	-0.89	-0.72	0.01	-0.33	-0.98	-0.96	-0.7
YBR003W	YBR003W || COQ1 (1)	0.44	1.16	0.11	0.29	0.58	0.29	0.52	-0.56	0.33	0.03	0.52	-0.07
YBR004C	YBR004C || GPI18 (1)	0.21	1.16	0.43	0.35	0.36	0.59	0.54	-0.08	-0.26	0.16	0.09	0.72
YBR005W	YBR005W || RCR1 (1)	-0.1	0.63	0.07	0.1	0.03	-0.24	0.02	0.8	-0.17	1.29	0.81	0.13
YBR006W	YBR006W || UGA2 (1)	0.06	1.35	0.35	0.2	0.39	0.12	0.19	0.16	0.32	0.38	1.03	0.21
YBR007C	YBR007C || (1)	-0.09	0.61	-0.07	-0.17	-0.33	-0.56	-0.55	0.01	-0.29	-0.45	-0.23	-0.04
YBR008C	YBR008C || FLR1 (1)	0.21	1.36	0.29	0.33	0.36	0.08	0.05	-0.57	-0.33	-0.24	-0.41	0.01
YBR009C	YBR009C || HHF1 (1)	0.34	0.38	0.32	-0.01	0.17	0.26	-0.07	-0.56	0.52	0.52	0.37	1.06
YBR010W	YBR010W || HHT1 (1)	0.11	0.43	0.17	-0.28	-0.03	-0.13	-0.26	-0.5	0.9	-0.29	0.31	0.33
YBR011C	YBR011C || IPP1 (1)	-0.07	0.67	-0.52	0	0.08	-0.13	-0.08	0.18	0.32	-0.21	0.12	0.29
YBR014C	YBR014C || (1)	0.15	0.95	0.08	0.41	-0.04	0.43	0.37	0.18	-0.15	0.27	-0.13	0.26
YBR015C	YBR015C || MNN2 (1)	-0.03	0.85	0.09	-0.09	0.15	0.01	0.13	-0.07	0.01	-0.16	0.1	-0.07
YBR016W	YBR016W || (1)	-0.26	0.42	-0.36	-0.34	-0.16	-0.51	-0.4	-0.79	0.28	0.66	0.06	-0.47
YBR017C	YBR017C || KAP104 (1)	-0.1	0.62	-0.22	-0.14	-0.23	-0.18	-0.3	0.13	-0.25	-0.2	-0.52	0.64
YBR018C	YBR018C || GAL7 (1)	0.65	1.67	0.59	0.73	0.69	1.12	0.57	0.39	0.39	0.3	0.05	0.03
YBR019C	YBR019C || GAL10 (1)									0.23	0.18	0.09	-0.15
YBR020W	YBR020W || GAL1 (1)	-0.53	0.53	-0.37	-0.34	-0.75	-0.53	-0.68	-0.16	-0.05	-0.22	-0.46	-0.72
YBR021W	YBR021W || FUR4 (1)	0.27	1.08	0.37	0.25	0.15	0.19	0.26	0.38	0.27	-0.28	-0.06	0.15
YBR022W	YBR022W || POA1 (1)	0.43	1.45	0.66	0.46	0.64	0.14	0.45	-0.46	-0.44	-0.25	-0.22	0.3
YBR023C	YBR023C || CHS3 (1)	1.08	1.89	1.04	1.24	1.14	1.21	1.29	0.73	-0.44	0.4	0.9	0.19
YBR024W	YBR024W || SCO2 (1)	0.05	0.93	-0.54	-0.24	0.02	-0.26	-0.14	-0.3	0.2	-0.2	0.57	0.3
YBR025C	YBR025C || (1)	0.11	0.76	-0.22	-0.1	-0.12	0.15	0.01	0.13	-0.23	-0.5	-0.4	-0.41
YBR026C	YBR026C || ETR1 (1)	0.51	1.49	0.22	0.27	0.59	0.46	0.3	-0.31	0.07	0.35	0.7	0.06
YBR027C	YBR027C || (1)									0.61	-0.11	0.21	-0.47
YBR028C	YBR028C || (1)	-0.31	0.33	-0.54	-0.57	-0.36	-0.31	-0.42	0.08	-0.54	-0.51	-0.89	0.37
YBR029C	YBR029C || CDS1 (1)	-0.09	0.7	0.28	-0.27	-0.07	-0.15	0.12	0.2	0.06	-0.21	-0.35	0.77
YBR030W	YBR030W || (1)	-0.31	0.23	-0.2	-0.54	-0.55	-0.59	-0.61	-0.58	-0.18	-0.5	-0.65	-0.46
YBR031W	YBR031W || RPL4A (1)	-0.56	-0.37	-0.79	-0.63	-0.58	-0.64	-0.6	-0.35	-0.07	-0.37	-0.28	-0.49
YBR032W	YBR032W || (1)	-1.15	0.06	-0.82	-0.36		0.1	-0.53	-0.56	-0.81	0.03	-0.09	0.35
YBR033W	YBR033W || (1)	0.21	1.14	0.29	0.24				0.78	0.18	1.34	1.84	0.65
YBR034C	YBR034C || HMT1 (1)	-0.19	0.83	-0.41	-0.04	-0.28	-0.28	0.04	-0.02	-0.05	-0.47	-0.49	-0.38
YBR035C	YBR035C || PDX3 (1)	0	1.07	-0.1	-0.11	-0.29	-0.3	-0.36	0.3	0.09	0.32	-0.09	-0.15
YBR036C	YBR036C || CSG2 (1)	-0.1	0.68	0.15	-0.23	-0.27	-0.27	-0.1	0.1	0.15	0.34	0.26	0.17
YBR037C	YBR037C || SCO1 (1)	-0.4	0.4	-0.77	-0.67	-0.28	-0.87	-0.29	-1.28	0.45	-0.07	0.24	-0.49
YBR038W	YBR038W || CHS2 (1)	0.08	0.97	0.52	0.07	-0.06	0.23	-0.06	-0.43	-0.13	0.09	-0.13	-0.08
YBR039W	YBR039W || ATP3 (1)	0.32	0.97	-0.03	0.2	0.37	0.17	0.46	-0.82	0.43	-0.23	0.7	0.04
YBR040W	YBR040W || FIG1 (1)									-0.01	0.17	1.4	0
YBR041W	YBR041W || FAT1 (1)	0.06	0.85	0.36	0.2	0.04	0.33	0.08	0.66	0.33	0.35	0.15	0.07
YBR042C	YBR042C || (1)	-0.08	0.38	-0.2	-0.41	-0.86	-0.58	-0.54	-0.15	0.12	-0.17	-0.49	-0.32
YBR043C	YBR043C || QDR3 (1)	0.17	1.02	0.25	0.08	0.26	0.08	0.44	0.01	-0.1	0.09	-0.32	-0.06
YBR044C	YBR044C || TCM62 (1)	0.23	0.99	0.07	-0.01	0.17	0.01	0.25	-0.47	-0.04	-0.39	0.02	-0.34
YBR045C	YBR045C || GIP1 (1)	-0.11			0.34					-0.13	-0.39	-0.5	-0.17
YBR046C	YBR046C || ZTA1 (1)	0.38	1.08	0.31	-0.01					-0.18	0.67	0.77	-0.52
YBR047W	YBR047W || (1)			0.23					0.03	-0.83	0.89	0.5	-0.19
YBR048W	YBR048W || RPS11B (1)	0.51	1.3	0.33	0.5	0.49	0.46	0.48	-0.72	-0.25	-0.15	-0.35	0.05
YBR049C	YBR049C || REB1 (1)	0.32	0.53	0.27	0.23	0.2	0.2	0.17	-0.33	0.01	-0.5	-0.38	-0.01
YBR050C	YBR050C || REG2 (1)	0.45	0.83	0.14	0.17	-0.06	0.07	-0.22	0.62	-0.39	-0.46	0.99	-0.65
YBR051W	YBR051W || (1)									0.14	-0.01	0.06	-0.28
YBR052C	YBR052C || (1)	0.24	1.18	-0.36	0.01	0.14	-0.08	-0.18	-0.27	0.5	0.06	0.44	0.04
YBR053C	YBR053C || (1)	0.08	1.28	0.42	-0.02	0.21	0.02	-0.25	-0.01	0.13	0.31	0.81	0.31
YBR054W	YBR054W || YRO2 (1)	-0.1	1.46	-1.39	0.39	0.61	0.64	-1.02	-0.64	2.73	-0.74	1.01	3.25
YBR055C	YBR055C || PRP6 (1)	-0.41	0.42	-0.63	-0.6	-0.2	-0.48	-0.44	-0.37	-0.12	-0.35	-0.59	-0.13
YBR056W	YBR056W || (1)	0.34	1.24	0.17	0.31	0.39	0.23	-0.14	0.44	-0.02	0.88	0.79	0.36
YBR057C	YBR057C || MUM2 (1)	0.43	1.14	0.01	-0.02	0.39	0.25	0.3	-0.04	-0.2	0.07	-0.04	0.22
YBR058C	YBR058C || UBP14 (1)	-0.04	0.91	0.12	0.01	-0.05	0.06	-0.2	-0.21	0	-0.15	-0.44	-0.31
YBR058C-A	YBR058C-A || TSC3 (1)	0.06	0.96	0.34	-0.01	-0.21	0	0.12	-0.55	-0.34	-0.15	-0.16	0.54
YBR059C	YBR059C || AKL1 (1)	0.11	1.11	0.1	0.17	0.22	-0.12	-0.03	-0.13	0.01	0.36	0.1	-0.2
YBR060C	YBR060C || ORC2 (1)	0.1	0.88	-0.05	-0.11	-0.07	-0.09	-0.23	-0.63	-0.14	-0.09	-0.51	-0.12
YBR061C	YBR061C || TRM7 (1)	0.25	1.1	0.37	0.4	0.18	0.27	0.43	-0.02	-0.27	-0.43	-0.67	-0.06
YBR062C	YBR062C || (1)	-0.55	0.52	-0.16	-0.37	-0.4	-0.27	-0.36	0.04	0.45	0.45	0.39	-0.14
YBR063C	YBR063C || (1)	0.23	1.08	0.13	0.38		0.6	0.21	0.24	-0.41	-0.24	-0.49	0.17
YBR064W	YBR064W || (1)	-0.64		-1.08	-0.85		-0.45	-1.01		-0.06	0.01	-0.25	-0.09
YBR065C	YBR065C || ECM2 (1)	-0.76	-0.13	-0.82	-0.38		-1.84	-0.47	-0.32	0.1	-0.12	-0.43	-0.24
YBR066C	YBR066C || NRG2 (1)	0.36	0.41	0.07	0.26	0.13	-0.16	0.17	0.37	-0.76	0.17	0.78	0.19
YBR067C	YBR067C || TIP1 (1)	0.07	1.1	-0.21	0.07	0.25	-0.07	-0.4	-1.98	-0.64	0.9	2.25	0.1
YBR068C	YBR068C || BAP2 (1)	0.35	0.91	0.27	0.25	0.22	0.47	0.47	0.03	0.12	0.43	-0.15	0.2
YBR069C	YBR069C || TAT1 (1)	0.02	0.74	-0.32	0	-0.38	0.14	-0.24	-1.45	0.38	-0.5	-0.54	0.1
YBR070C	YBR070C || ALG14 (1)	0.38	1.05	0.55	0.38	0.26	0.41	0.43	0.18	-0.21	-0.32	-0.09	0.57
YBR071W	YBR071W || (1)	0.43	0.97	0.64	0.31	0.32	0.27	0.23	0.64	0.17	0.4	0.74	0.59
YBR072W	YBR072W || HSP26 (1)	0.46	2.83	0.36	1.84	1.92	1.85	0.85	-0.9	-0.19	1.5	2.16	0.01
YBR073W	YBR073W || RDH54 (1)	0.21	1.25	0.14	0.28	0.33	0.25	0.26	0.57	-0.26	-0.05	0.16	-0.22
YBR074W	YBR074W || (1)			0.66	0.56		0.81			1.04	0.46	0.13	1.02
YBR075W	YBR075W || (1)	-0.48	0.31	-0.56	-0.3	-0.31	-0.07	-0.39	-0.27	-0.47	-0.34	-0.62	-0.38
YBR076W	YBR076W || ECM8 (1)			0.31						0.95	1.69	2.47	2.01
YBR077C	YBR077C || SLM4 (1)			0.67						-0.52	0.14	0.09	-0.07
YBR078W	YBR078W || ECM33 (1)	0.23	0.97	0.38	0.12	0.29	0.09	0.13	0.29	0.3	0.55	0.56	0.39
YBR079C	YBR079C || RPG1 (1)	-0.62	-0.49	-1.08	-0.53	-0.31	-0.49	-0.48	-0.32	0	-0.34	-0.71	-0.52
YBR080C	YBR080C || SEC18 (1)	-0.13	0.73	-0.01	-0.13	-0.1	-0.11	-0.39	0.15	0.12	-0.08	-0.31	-0.28
YBR081C	YBR081C || SPT7 (1)	0.23	1.07	0.18	0.22	0.34	0.26	0.13	0.02	-0.21	-0.18	-0.48	-0.23
YBR082C	YBR082C || UBC4 (1)	0.29	1.2	0.32	0.38	0.38	0.48	0.25	-0.55	-0.6	0.18	-0.09	0.8
YBR083W	YBR083W || TEC1 (1)	0.15	0.02	-0.57	-0.97	-0.37	0.04	-0.37	-0.64	-0.51	-0.33	0.6	-0.28
YBR084C-A	YBR084C-A || RPL19A (1)	0.7	1.65	0.7	0.69	0.71	0.89	0.77	-0.08	-0.2	0.07	-0.31	0.16
YBR084W	YBR084W || MIS1 (1)	0.14	0.88	-0.09	0.06	0.2	0.04	0.08	-0.33	0	-0.87	-0.69	-0.28
YBR085C-A	YBR085C-A || (1)	0.7	1.73	0.96	1.05	0.96	0.91	0.93	0.32	0.95	1.29	1.38	0.73
YBR085W	YBR085W || AAC3 (1)	-0.77	-0.02	-1.22	-0.73	-1	-0.64	-0.27	1.32	-2.19	-0.44	-1.1	-1.51
YBR086C	YBR086C || IST2 (1)	-0.04	0.59	-0.43	-0.27	-0.19	-0.24	-0.38	-0.27	0.02	-0.45	0	-0.08
YBR087W	YBR087W || RFC5 (1)		0.3	0.48	-0.11					-0.46	-0.31	-0.44	0
YBR088C	YBR088C || POL30 (1)	0.44	1.32	0.27	0.25	0.35	0.4	0.45	0.02	-0.08	-0.04	0.07	0.08
YBR089C-A	YBR089C-A || NHP6B (1)	-0.01	0.81	0.03	-0.13	0.04	-0.26	0.02	0.04	0.15	0.38	0.67	-0.32
YBR089W	YBR089W || (1)	-0.36	0.8	-0.35	-0.47	-0.4	-0.17	-0.22		-0.46	0.02	0.29	0.17
YBR090C	YBR090C || (1)		-0.37	-0.71	-0.79			-0.39		0.69	0.69	0.78	0.4
YBR091C	YBR091C || MRS5 (1)	-0.16	0.93	0.19	0.02	-0.15	-0.07	0.3	-0.16	-0.27	-0.43	-0.11	0.24
YBR092C	YBR092C || PHO3 (1)	-0.1	0.78	-1.59	0.21	-0.22	0.67	-0.14	0.4	-0.06	-0.03	0.38	-0.32
YBR093C	YBR093C || PHO5 (1)	0.1	1.04	-0.72	-0.1	-0.82	-1.63	-0.43	0.49	-4.33	-1.93	-2.41	-2.57
YBR094W	YBR094W || (1)	0.56	1.16	0.22	0.27		0.8	0.17	-0.17	-0.33	-0.23	-0.21	-0.01
YBR095C	YBR095C || (1)	0.21	0.94	0.35	0.23	-0.1	-0.09		0	-0.22	0.12	-0.23	-0.28
YBR096W	YBR096W || (1)	0.95	2.15	1.49	0.95	1.22	1.32	1.15	0.51	-0.4	0.15	-0.33	0.04
YBR097W	YBR097W || VPS15 (1)	0.34	1.06	0.01	0.2	-0.02	0.24	0.41	-0.39	-0.05	-0.45	-0.08	0.36
YBR098W	YBR098W || MMS4 (1)	0.75	1.36	0.59	0.38	0.59	0.56	0.39	0.04	0.59	-0.16	-0.14	0.31
YBR099C	YBR099C || (1)	-0.12	0.55	0.11	0.19	-0.2	0.36	-0.09	-0.46	-0.11	0.29	-0.47	0.34
YBR100W	YBR100W || (1)	0.01	0.79	-0.03	-0.07	-0.23	-0.12	0	-0.38	0.04	-0.27	-0.16	-0.04
YBR101C	YBR101C || FES1 (1)	0.25	1.19	0.88	0.64	0.51	0.77	0.53	-0.28	-0.41	0.61	0.18	0.35
YBR102C	YBR102C || EXO84 (1)	-0.44	0.58	0.03	0.04		-0.5	-0.3		0.24	0.19	-0.02	-0.38
YBR103C-A	YBR103C-A || (1)			-0.5						0.18	-0.17	0.04	0.15
YBR103W	YBR103W || SIF2 (1)	-0.19	0.78	-0.18	-0.27	-0.43	-0.4	-0.23	0.08	-0.12	-0.23	-0.09	-0.37
YBR104W	YBR104W || YMC2 (1)	0.05	0.99	0.53	0.37	-0.11	0.26	0.4	0.92	-0.86	-0.43	-1.2	-0.3
YBR105C	YBR105C || VID24 (1)	-0.37	0.87	-0.13	0.35		0.37	0.67	-0.18	0.12	-0.14	0.18	-0.08
YBR106W	YBR106W || PHO88 (1)	-0.24	0.72	-0.24	-0.16	-0.11	-0.1	0.26	0.11	0.06	-0.13	-0.58	0.17
YBR107C	YBR107C || IML3 (1)	-0.13	0.73	-0.24	-0.32	-0.41	-0.39	-0.16	0.08	0.06	-0.28	-0.07	0.17
YBR108W	YBR108W || (1)									-0.14	0.15	0.23	0.25
YBR109C	YBR109C || CMD1 (1)	0.01	1.07	0.19	0.18	-0.01	0.73	0.1	0.23	0.08	0.41	0.51	0.2
YBR110W	YBR110W || ALG1 (1)	0.07	0.82	0.29	-0.05	-0.02	0.32	0.27	0.23	-0.04	0.06	-0.04	-0.17
YBR111C	YBR111C || YSA1 (1)	-0.17	0.84	-0.47	-0.21	-0.1	-0.04	-0.1	0.41	0.13	0	0.18	-0.14
YBR112C	YBR112C || CYC8 (1)	0.04	0.52	-0.3	-0.27	-0.09	-0.39	-0.29	-0.57	-0.03	-0.25	-0.05	-0.21
YBR113W	YBR113W || (1)	0.33	0.96	0.17	0.31	0.4	0.59	-0.21	-0.56	-0.64	0.33	0.14	0.33
YBR114W	YBR114W || RAD16 (1)	0.19	0.99	-0.17	0.2	0.34	-0.08	0.18	0.29	0.19	-0.41	0.11	-0.02
YBR116C	YBR116C || (1)	-0.31	2.02	-0.42	-0.05	0.25	-0.61	-0.13	0	0.58	0.28	1.99	0.12
YBR117C	YBR117C || TKL2 (1)				-0.36					1.05	0.15	2.03	-0.11
YBR118W	YBR118W || TEF2 (1)	0.13	0.75	-0.03	0.24	0.1	-0.01	0.1	0.3	1.1	0.5	0.85	1.6
YBR119W	YBR119W || MUD1 (1)	-0.21	0.59	0.07	-0.23	-0.28	-0.06	-0.28	0.11	0.09	0.1	0.23	-0.09
YBR120C	YBR120C || CBP6 (1)	0.24		0.65						0.37	0.02	0.61	0.26
YBR121C	YBR121C || GRS1 (1)	0.25	1.15	0.07	0.26	0.3	0.21	0.3	-0.14	0.1	0	-0.01	0.04
YBR122C	YBR122C || MRPL36 (1)	0.14	1	0.06	-0.1	-0.01	-0.12	0.26	-0.77	0.58	-0.25	0.06	0.11
YBR123C	YBR123C || TFC1 (1)	-0.2	0.71	-0.16	-0.21	-0.21	-0.46	0.09	-0.36	-0.05	0.07	-0.35	-0.24
YBR124W	YBR124W || (1)									-0.34	0.44	0.11	0.02
YBR125C	YBR125C || PTC4 (1)	0.12	0.96	0.25	0.28	-0.23	0.19	0.13	0.42	-0.27	-0.11	-0.15	0.25
YBR126C	YBR126C || TPS1 (1)	0.41	1.33	0.16	0.23	0.47	0.15	-0.01	-0.39	0.93	0.26	0.56	-0.06
YBR127C	YBR127C || VMA2 (1)	-0.67	0.13	-1.03	-1.07	-0.85	-0.88	-1.15	-0.18	-0.02	-0.35	-0.45	-0.24
YBR128C	YBR128C || ATG14 (1)	-0.23	1.24	-0.5	-0.01	-0.5	0.28	0.03	-0.07	-0.2	-0.15	0.5	0.14
YBR129C	YBR129C || OPY1 (1)	-0.96	0.24	-0.52	-0.74	-0.48	-0.64	-0.65	0.15	-0.01	-0.03	-0.64	-0.04
YBR130C	YBR130C || SHE3 (1)	0.08	0.81	0.22	0.19	0.14	0.11	-0.1	-0.22	0.08	0.07	-0.35	0.18
YBR131W	YBR131W || CCZ1 (1)	-0.34	0.71	-0.49	-0.32	-0.29	-0.23	-0.26	-0.15	-0.33	-0.06	-0.38	-0.34
YBR132C	YBR132C || AGP2 (1)	0	0.7	0.1	0.57		0.73	0.26	0.08	1.03	1	1.54	2.05
YBR133C	YBR133C || HSL7 (1)	-0.39	0.5	-0.5	-0.29	-0.48	-0.39	-0.55	-0.35	-0.38	-0.47	-0.32	-0.53
YBR134W	YBR134W || (1)									-0.43
YBR135W	YBR135W || CKS1 (1)	-0.03	1.03	-0.14	0.33	0.12	0.25	0.23	-0.26	-0.65	-0.19	-0.15	0.01
YBR136W	YBR136W || MEC1 (1)				-0.8	0.39	0.41	0.06	0.35	0.08	0.06	0.56	-0.1
YBR137W	YBR137W || (1)	-0.08	1.2	0.38	0.14	-0.02	0.05	-0.02	0.35	-0.15	-0.11	-0.18	0.36
YBR138C	YBR138C || (1)	0.29	1.26	0.58	0.26	0.06	0.37	0.29	0.07	-0.21	0.52	0.32	0.07
YBR139W	YBR139W || (1)	0.11	1.08	0.25	0.09	0.14	-0.04	-0.14	0.16	0.37	0.3	0.71	-0.22
YBR140C	YBR140C || IRA1 (1)	0.2	1.19	0.15	0.05	0.35	-0.03	0.15	-0.36	-0.1	-0.17	0.28	-0.21
YBR141C	YBR141C || (1)	-0.06	0.61	0.01	-0.01	-0.15	-0.13	-0.25	-0.67	-0.01	-0.44	-0.53	-0.66
YBR142W	YBR142W || MAK5 (1)	-0.14	0.42	-0.24	0.05	-0.12	0.05	-0.35	0.13	-0.2	-0.22	-0.85	-0.44
YBR143C	YBR143C || SUP45 (1)	-0.05	0.84	-0.06	-0.03	-0.23	-0.1	-0.09	0.34	-0.03	-0.18	-0.44	-0.55
YBR144C	YBR144C || (1)	0.11	0.36	0			1.07			0.14
YBR145W	YBR145W || ADH5 (1)	0.28	0.69	1.69	-0.02	0.45	0.04	0.69	1.22	-0.77	0.65	-0.97	-0.11
YBR146W	YBR146W || MRPS9 (1)	0.25	1.21	0.58	-0.28	0.12	0.1	0.27	-0.34	0.78	-0.08	0.34	-0.09
YBR147W	YBR147W || (1)								1.42	0.91	1.51	1.47	1.22
YBR148W	YBR148W || YSW1 (1)	-0.47	0.76	-0.28	0.08	0	0.32	-0.15	1	0.23	0.4	-0.9	-0.01
YBR149W	YBR149W || ARA1 (1)	-0.02	0.93	0.14	-0.16	-0.06	-0.32	-0.2	-0.07	0.84	0.84	1.27	0.04
YBR150C	YBR150C || TBS1 (1)	0.45	0.92	0.7	0.73	0.36	0.58	0.41	0.69	-0.18	0.26	0.26	0.45
YBR151W	YBR151W || APD1 (1)	-0.3	0.72	-0.3	-0.45	-0.43	-0.38	-0.38	0.09	0.09	-0.23	0.17	-0.03
YBR152W	YBR152W || SPP381 (1)		0.31	-0.48	0.21		0.42			0.53	-0.28	-0.72	-0.95
YBR153W	YBR153W || RIB7 (1)	0.01	0.53	-0.05	-0.17	-0.29	-0.33	-0.32	-0.86	-0.08	-0.32	-0.18	-0.43
YBR154C	YBR154C || RPB5 (1)	-0.05	0.97	-0.3	-0.1	-0.56	-0.19	-0.33	0.26	-0.45	-0.17	-0.53	0
YBR155W	YBR155W || CNS1 (1)	0.06	1.07	0	0.56	0.09	0.36	0.16	0.2	-0.41	-0.26	-0.93	-0.2
YBR156C	YBR156C || SLI15 (1)	-0.13	0.94	-0.1	-0.03	-0.01	-0.14	-0.23	-0.12	-0.06	-0.32	-0.01	-0.13
YBR157C	YBR157C || ICS2 (1)	0.14	0.77	0.05	0.28	0.38	-0.08	-0.17	-0.79	1.25	-0.83	-0.51	0.85
YBR158W	YBR158W || AMN1 (1)	0.26	0.81	0.02	-0.12	-0.1	0.12	0.05	-0.24	0.21	-0.7	-0.42	-0.12
YBR159W	YBR159W || (1)	0.12	0.93	0.21	0.22	0.13	0.35	0.41	0.17	-0.08	0.16	-0.15	0.25
YBR160W	YBR160W || CDC28 (1)	0.07	0.96	0.02	0.17	-0.05	0.07	0.04	0.41	-0.5	-0.16	0.04	0.25
YBR161W	YBR161W || CSH1 (1)	0.55	1.09	0.06	0.47	0.25	0.44	0.57	0.3	-0.25	-0.07	-0.25	0.27
YBR162C	YBR162C || TOS1 (1)	0.26	1.03	0.11	0.29	0.41	0.18	0.27	-0.03	-0.19	0.65	0.01	1.1
YBR162W-A	YBR162W-A || YSY6 (1)	0.02	0.95	0.32	0.19	-0.06	0.14	0.14	0.25	0.03	0.15	0.18	0.41
YBR163W	YBR163W || DEM1 (1)	-0.02	0.93	-0.14	-0.3	-0.09	-0.19	-0.04	-0.48	-0.26	-0.46	-0.52	-0.12
YBR164C	YBR164C || ARL1 (1)	0.48	1.38	0.68	0.56	0.39	0.5	0.47	0.27	-0.2	0.23	-0.3	0.04
YBR165W	YBR165W || UBS1 (1)	0.07	0.76	0.27	0.08	0	0.08	0.19	0.02	0.22	-0.03	-0.22	0.21
YBR166C	YBR166C || TYR1 (1)	-0.01	0.99	0.33	0.18	0	0.32	0.27	0.71	-0.41	0.16	-0.05	-0.06
YBR167C	YBR167C || POP7 (1)	-0.09	1.24	0.3	0.23	0.32	0.29	0.32	0.32	-0.11	0.32	-0.11	0.28
YBR168W	YBR168W || PEX32 (1)		1.6	0.78	0.55					-0.14	-0.16	-0.11	0.03
YBR169C	YBR169C || SSE2 (1)	0.47	0.61	-0.06	0		0.22		-0.73	0.01	0.73	1.04	-0.13
YBR170C	YBR170C || NPL4 (1)	-0.48	0.97	-0.58	-0.17		-0.24	-0.02	-0.03	0	-0.1	-0.04	-0.47
YBR171W	YBR171W || SEC66 (1)	0.42	1.01	0.45	0.44	0.27	0.72	0.4	0.21	-0.37	0.01	-0.62	-0.15
YBR172C	YBR172C || SMY2 (1)	0.01	0.76	-0.24	-0.29	-0.38	-0.22	-0.19	-0.12	-0.15	-0.43	-0.62	-0.42
YBR173C	YBR173C || UMP1 (1)	-0.27	0.84	0.14	0	-0.19	0.25	0.01	0.6	0.11	0.58	0.2	0.22
YBR174C	YBR174C || (1)				0.21					-0.06	-0.34	-0.84	0.25
YBR175W	YBR175W || SWD3 (1)	0.27	1.09	0.52	0.29		0.43	0.14	0.24	-0.17	-0.24	-0.64	-0.29
YBR176W	YBR176W || ECM31 (1)	-0.37	0.49	-0.14	-0.07	-0.3	-0.19	0.13	-0.09	-0.3	0	-0.26	-0.12
YBR177C	YBR177C || EHT1 (1)	-0.55	-0.13	-0.11	-1.37	-0.3	-1.22	-0.81	-0.24	-0.17	-0.68	-0.4	-0.64
YBR178W	YBR178W || (1)	0.36	1.41	0.58	0.51		0.33			-1.03	-0.03	-0.4	0.36
YBR179C	YBR179C || FZO1 (1)	0.34	1.11	0.38	0.11	0.29	0.11	0.34	-0.34	0.1	0.07	0.05	0.2
YBR180W	YBR180W || DTR1 (1)	0.49	1.03	0.17	0.66		1.09			-0.23	0.43	-0.54	-0.12
YBR181C	YBR181C || RPS6B (1)	-0.22	0.53	-0.52	-0.27	-0.45	-0.16	-0.18	0.02	-0.05	-0.12	-0.12	-0.05
YBR182C	YBR182C || SMP1 (1)	-0.21	0.23	-0.1	0.15	0.03	-0.35	-0.1	1.19	-0.39	0.72	0.62	0.11
YBR183W	YBR183W || YPC1 (1)	0.36	0.98	-0.13	-0.05	0.37	-0.26	-0.06	1.25	0.76	-0.35	1.71	0.08
YBR184W	YBR184W || (1)		0.57	-0.14	0.17		-0.1	0.12	0.71	0.07	-0.35	0.11	-0.13
YBR185C	YBR185C || MBA1 (1)	0.46	1.26	0.24	0.35	0.76	0.15	0.38	-0.93	0.56	0.04	0.75	0.55
YBR186W	YBR186W || PCH2 (1)									1.06	0.36
YBR187W	YBR187W || (1)	-0.26	0.46	-0.28	-0.4	-0.61	-0.16	-0.27	-0.19	-0.24	-0.89	-0.99	0.01
YBR188C	YBR188C || NTC20 (1)			-0.38					-0.94	-0.48	0.2	0.27	-0.15
YBR189W	YBR189W || RPS9B (1)	0.56	0.85	0.21	0.47	0.45	0.68	0.58	0.3	0.41	0.54	0.47	0.66
YBR190W	YBR190W || (1)	-1.04	-0.27	-0.82	-0.71	-1	-0.74	-0.45	-1.03	0.4	-0.31	-0.36	0.43
YBR191W	YBR191W || RPL21A (1)	0.02	0.75	-0.07	0.05	0.07	0.29	0.07	-0.27	0.09	-0.04	-0.28	0.83
YBR192W	YBR192W || RIM2 (1)	0.05	1.07	0.03	0	0.24	-0.03	0.33	-0.23	0.19	-0.45	-0.2	-0.22
YBR193C	YBR193C || MED8 (1)	-0.07	0.82	-0.11	-0.19	-0.18	-0.07	-0.16	-0.27	0.08	0.03	-0.04	-0.05
YBR194W	YBR194W || (1)	-0.08	0.63	0.2	-0.13	-0.24	0.05	0.18	-0.04	0.13	0.09	0.14	-0.05
YBR195C	YBR195C || MSI1 (1)	0.25	0.94	0.22	0.15	0.34	-0.17	-0.14	-0.48	0.21	-0.42	-0.6	-0.36
YBR196C	YBR196C || PGI1 (1)	0.12	0.82	0.04	0.3	0.13	0.1	0.18	0.18	-0.42	-0.06	-0.11	-0.28
YBR197C	YBR197C || (1)	-0.82	0.36	-0.81	-0.7	-0.62	-0.52	-0.56	0.43	0.07	-0.5	-0.48	0.5
YBR198C	YBR198C || TAF5 (1)	0.01	0.8	-0.21	-0.14	-0.1	-0.27	-0.34	-0.76	-0.18	-0.14	-0.17	-0.21
YBR199W	YBR199W || KTR4 (1)	0.21	1.03	0.38	0.27	0.21	0.29	0.19	0.11	0.15	0.5	0.21	0.06
YBR200W	YBR200W || BEM1 (1)	-0.17	0.94	-0.28	-0.1	-0.31	-0.12	-0.23	-0.19	0.01	-0.11	-0.33	-0.32
YBR201W	YBR201W || DER1 (1)		1.22	0.87					1.3	0.05	0.15	0.29	0.1
YBR202W	YBR202W || CDC47 (1)	0.4	1.27	0.13	0.14	0.5	0.1	-0.17	-0.43	0.03	-0.28	-0.2	0.08
YBR203W	YBR203W || COS111 (1)									-0.3	0.35	1.06	0.13
YBR204C	YBR204C || (1)	0.28	1.2	0.2	0.2	-0.08	-0.02	0.15	0	0.08	0.32	0.51	0.2
YBR205W	YBR205W || KTR3 (1)	0.11	0.85	-0.08	0.12	0.13	0.14	0.18	0.09	-0.05	-0.14	-0.42	-0.67
YBR206W	YBR206W || (1)	0.1	0.84	-0.18	-0.02	-0.18	-0.1	-0.29	-0.34	0.14	0.21	0.06	-0.33
YBR207W	YBR207W || FTH1 (1)		0.98	0.44						0.49	0.34	0.1	0.08
YBR208C	YBR208C || DUR1,2 (1)	-0.27	1.05	1.27	-0.38	0.09	-0.37	-0.83	0	-1.29	-0.52	-1.1	-1.64
YBR209W	YBR209W || (1)									0.41
YBR210W	YBR210W || ERV15 (1)	0.49	1.31	0.63	0.22	0.34	0.61	0.61	0.19	-0.01	0.35	-0.08	0.46
YBR211C	YBR211C || AME1 (1)	0.23	1.16	0.49	-0.02	-0.2	0.03	-0.02	-0.4	-0.13	-0.03	-0.27	-0.21
YBR212W	YBR212W || NGR1 (1)	0.31	1.12	0	0.27	0.25	0.14	0.16	-0.77	0.36	0.62	0.59	0.03
YBR213W	YBR213W || MET8 (1)	0.42			0.02	0.66	0.59	0.14	-0.1	0.06	-0.46	-0.38	-1.01
YBR214W	YBR214W || SDS24 (1)	-0.39	0.88	-0.41	-0.62			-1.22	-1.03	0.03	0.78	1.2	0.16
YBR215W	YBR215W || HPC2 (1)	0.37	1.07	0.46	0.53		0.38	0.79	0.22	-0.17	0	-0.13	-0.3
YBR216C	YBR216C || YBP1 (1)	0.02	0.78	-0.17	-0.02	-0.16	-0.1	-0.21	-0.02	0.07	0.02	-0.18	0.03
YBR217W	YBR217W || ATG12 (1)	0.34	0.97	0.31	0.21	-0.05	0.57	0.41	0.09	0.04	-0.2	-0.32	-0.01
YBR218C	YBR218C || PYC2 (1)	0.14	0.92	0.34	0.12	0.3	-0.09	0.28	0.19	-0.21	0.23	-0.21	-0.65
YBR219C	YBR219C || (1)			0.14						0.06	-0.31	-0.88	1.53
YBR220C	YBR220C || (1)	-0.14	0.58	-0.14	-0.16	-0.16	-0.17	-0.12	-0.01	-0.06	-0.38	-0.82	-0.5
YBR221C	YBR221C || PDB1 (1)	-0.11	0.78	0.04	-0.16	-0.04	-0.1	0.2	-0.11	0.22	-0.11	-0.05	-0.15
YBR222C	YBR222C || PCS60 (1)	-0.21	0.87	-0.08	-0.03	0.07	-0.29	-0.03	0.22	-0.41	0.36	0.21	-0.39
YBR223C	YBR223C || TDP1 (1)	-0.38	0.33	-0.75	-0.61	-0.42	-1.01	-0.58	0.01	0.1	0.14	0.03	-0.84
YBR225W	YBR225W || (1)		0.36		-0.5				0.1	-0.04	-0.24	0.38	0.91
YBR226C	YBR226C || (1)			-1.08						0.04			0.02
YBR227C	YBR227C || MCX1 (1)	-0.15	0.83	-0.01	-0.06	-0.12	-0.26	-0.22	0.12	-0.12	-0.11	-0.64	-0.3
YBR228W	YBR228W || SLX1 (1)	-0.43	0.44	-0.44	-0.13		-0.15	-0.61		-0.1	0.01	-0.18	0.15
YBR229C	YBR229C || ROT2 (1)	-0.13	0.82	-0.35	-0.12	-0.09	0.21	0.02	-0.43	0.17	0	0.04	-0.34
YBR230C	YBR230C || (1)	0.42	1.48	-0.33	0.19	0.38	0.51	0.49	-0.39	0.66	-0.32	1.27	0.12
YBR231C	YBR231C || SWC5 (1)	-0.54	0.32	-0.71	-0.68	-0.66	-1	-0.57	-0.3	-0.01	-0.07	-0.29	-0.81
YBR233W	YBR233W || PBP2 (1)	-0.09	0.96	0.18	0.16	0.03	0.23	-0.12	-0.45	-0.12	0.01	-0.22	0.06
YBR233W-A	YBR233W-A || DAD3 (1)	0.1	0.34	0.25	0.01		0.15	0.23	-0.95	-0.09	0.02	-0.37	0.33
YBR234C	YBR234C || ARC40 (1)	-0.04	1.17	0.09	-0.12	0.11	-0.06	-0.11	0.06	0.09	0.57	0.45	-0.07
YBR235W	YBR235W || (1)	0.02	1.08	0.1	0.03	0.13	0.21	0	0.03	-0.13	-0.19	-0.22	-0.11
YBR236C	YBR236C || ABD1 (1)	0.15	1.06	0.29	0.18	0.19	-0.07	0.09	-0.01	-0.2	0.26	0.07	-0.07
YBR237W	YBR237W || PRP5 (1)	-0.01	0.7	0.19	-0.07		0.16	-0.09		0.11	-0.12	-0.15	-0.35
YBR238C	YBR238C || (1)	0.29	0.87	-0.08	0.25	0.06	0.08	0.03	0.21	-0.79	-0.29	-1.02	1.31
YBR239C	YBR239C || (1)	-0.22	0.66	-0.26	-0.39	-0.17	-0.5	-0.28	-0.1	-0.58	-0.52	-0.52	0.85
YBR240C	YBR240C || THI2 (1)	-0.05	1.22	0.28	0.2	0.31	0.15	0.37	0.68	-0.21	-0.17	0.27	0.23
YBR241C	YBR241C || (1)	-0.33	0.77	-0.75	-0.75	-0.03	-0.3	-0.48	0.06	0.33	0.13	0.82	-0.26
YBR242W	YBR242W || (1)	-0.15	0.54	-0.18	-0.19	-0.29	-0.09	-0.2	0.75	-0.79	-0.4	-0.49	-0.27
YBR243C	YBR243C || ALG7 (1)	0.04	0.79	0.15	0.15	-0.13	0.03	0.05	-0.11	0.09	0.03	-0.41	-0.1
YBR244W	YBR244W || GPX2 (1)	0.36	0.98	0.61	1.21		1.32	0.16	-0.06	0.14	0.83	-0.59	-0.57
YBR245C	YBR245C || ISW1 (1)	-0.11	0.6	-0.26	-0.34	-0.63	-0.26	-0.34	-0.35	-0.23	-0.27	-0.4	-0.39
YBR246W	YBR246W || (1)	0.4	1.39	0.45	0.31	0.38	0.36	0.17	0.2	-0.53	-0.35	-0.15	-0.12
YBR247C	YBR247C || ENP1 (1)	-0.44	0.47	-0.6	-0.2	-0.56	-0.32	-0.37	-0.03	0.04	-0.42	-0.85	-0.63
YBR248C	YBR248C || HIS7 (1)	0.11	0.88	0.17	0	0.19	-0.16	0.27	0.7	-0.17	0.52	-0.36	-0.24
YBR249C	YBR249C || ARO4 (1)	-0.4	0.35	-0.26	-0.57	-0.5	-0.42	-0.09	0.91	-0.56	0.13	-0.73	-0.86
YBR250W	YBR250W || (1)									0.25	-0.01	-0.13	0.48
YBR251W	YBR251W || MRPS5 (1)	0.41	1.25	0.25	0.1	0.34	0.22	0.56	-0.6	0.54	-0.18	0.32	0.04
YBR252W	YBR252W || DUT1 (1)	0.22	1.12	0.13	0.12	0.06	0.33	0.2	-0.45	-0.64	-0.48	-0.47	0.18
YBR253W	YBR253W || SRB6 (1)	0.66	1.72	0.9	0.42	0.59	0.72	0.56	0.1	-0.01	-0.08	-0.12	0.45
YBR254C	YBR254C || TRS20 (1)	0.3	1.15	0.59	0.22	-0.1	0.44	0.21	0.41	-0.46	-0.12	-0.42	0.61
YBR255C-A	YBR255C-A || (1)									0.21	-0.22	0.76	1.19
YBR255W	YBR255W || (1)	-0.39	0.58	-0.01	-0.19	-0.28	-0.39	-0.27	0.38	0.21	0.06	0.05	-0.53
YBR256C	YBR256C || RIB5 (1)	-0.19	0.98	0.39	-0.12	-0.28	-0.17	0.22	0.99	-0.12	0.51	-0.14	-0.22
YBR257W	YBR257W || POP4 (1)	-0.06	0.9	0.23	0.17	-0.2	0.45	0.07	0.76	0.2	-0.07	0.13	-0.05
YBR258C	YBR258C || SHG1 (1)	-0.25	0.68	0	-0.1	-0.3	-0.09	0.1	0.62	-0.06	-0.03	0.6	-0.34
YBR259W	YBR259W || (1)	-0.27	0.9	0.27	0.12	-0.11	0.02	0.22	0.39	-0.12	-0.7	-0.15	0.77
YBR260C	YBR260C || RGD1 (1)	-0.26	0.39	-0.46	-0.49	-0.23	-0.4	-0.43	-0.46	0.02	-0.15	-0.18	-0.23
YBR261C	YBR261C || (1)	-1.05	-0.33	-0.91	-0.83	-0.95	-1.05	-0.93	-0.76	-0.29	-0.51	-0.81	-0.65
YBR262C	YBR262C || (1)	0.43	1.19	0.54	0.26	0.64	0.24	0.66	-0.33	0.45	-0.02	0.8	0.2
YBR263W	YBR263W || SHM1 (1)	-0.54	0.27	-0.71	-0.53	-0.58	-0.52	-0.55	0.22	-0.34	-0.26	-0.18	0.6
YBR264C	YBR264C || YPT10 (1)	-0.46	0.05	-0.42	-0.22	-0.52	-0.49	-0.52	-0.32	-0.11	0.29	0.66	0.05
YBR265W	YBR265W || TSC10 (1)	-0.32	0.43	-0.46	-0.66	-0.54	-0.83	-0.69	-0.82	-0.11	-0.4	-0.7	-0.64
YBR266C	YBR266C || SLM6 (1)	-0.66	-0.05	-0.77	-0.59	-0.61	-0.53	-0.42	-0.32	0.24	-0.32	-0.71	-0.46
YBR267W	YBR267W || REI1 (1)	-0.09	0.81	-0.3	-0.21	-0.21	-0.14	-0.19	-0.72	0.15	-0.54	-0.68	-0.33
YBR268W	YBR268W || MRPL37 (1)	0.05	1.14	0.05	-0.18	0.17	-0.03	0.2	-0.47	0.18	-0.14	0.41	0.32
YBR269C	YBR269C || (1)	0.08	0.93	0.39	-0.06	0.26	-0.1	0.15	-0.32	0.15	0.71	1.14	0.16
YBR270C	YBR270C || (1)	-0.02	0.76	-0.17	-0.34	-0.35	0.07	-0.22	-0.32	0.23	-0.25	-0.25	-0.07
YBR271W	YBR271W || (1)	0.28	0.99	0.2	0.36	-0.15	0.16	0.14	-0.06	-0.15	-0.41	-1.06	-1.13
YBR272C	YBR272C || HSM3 (1)	0.79	1.32	0.7	0.57	0.58	0.64	0.79	0.5	0.05	0.38	0.42	0.26
YBR273C	YBR273C || UBX7 (1)	-0.52	0.1	-0.12	-0.44	-0.51	-0.61	-0.5	-0.23	0.29	0.22	0.22	-0.4
YBR274W	YBR274W || CHK1 (1)	0.38	1.28	0.63	0.36	0.7	0.33	0.26	-0.62	-0.33	0	-0.29	-0.19
YBR275C	YBR275C || RIF1 (1)	0.05	0.77	-0.17	-0.33	-0.28	-0.37	-0.24	-0.11	-0.61	-0.55	-0.29	0.41
YBR276C	YBR276C || PPS1 (1)	0.07	0.84	-0.19	0.01	-0.29	0.04	-0.14	0.14	-0.29	-0.02	-0.07	-0.16
YBR277C	YBR277C || (1)									-0.26	-0.38	-0.11	0.36
YBR278W	YBR278W || DPB3 (1)									-0.13	-0.01	0.21	0.05
YBR279W	YBR279W || PAF1 (1)	-0.25	0.61	-0.01	-0.15	-0.39	-0.22	-0.35	0.3	0.19	-0.05	-0.41	-0.54
YBR280C	YBR280C || (1)	-0.21	0.9	-0.29	-0.14	-0.02	-0.07	-0.36	0.24	-0.12	-0.03	0.38	-0.25
YBR281C	YBR281C || (1)	-0.01	0.76	0.02	0.15	-0.32	-0.27	-0.22	-0.13	-0.56	-0.2	-0.25	-0.54
YBR282W	YBR282W || MRPL27 (1)	0.3	1.16	0.49	0.29	0.39	0.14	0.58	-0.34	0.48	0.19	0.66	0.1
YBR283C	YBR283C || SSH1 (1)	0.03	0.8	-0.14	-0.09	-0.14	0.07	0.07	-0.02	-0.09	-0.22	-0.41	-0.1
YBR284W	YBR284W || (1)	-0.2	1.09	-0.07	0.67	0.23	0.3	0.32	1.14	0.56	1.46	1.31	0.15
YBR285W	YBR285W || (1)			0.24						0.15	0.86	1.44	-0.09
YBR286W	YBR286W || APE3 (1)	-0.52	0.36	-0.87	-0.51	-0.51	-0.33	-0.44	0.06	0.56	0.27	0.22	-0.91
YBR287W	YBR287W || (1)	-0.05	0.82	-0.22	0.07	-0.47	-0.24	-0.29	0.86	-0.06	0.02	-0.23	1.39
YBR288C	YBR288C || APM3 (1)	0.23	1.05	0.35	0.16	0.14	0.26	0.04	0.11	0.01	0.12	-0.12	0.16
YBR289W	YBR289W || SNF5 (1)	-0.24	0.66	-0.17	-0.14	0	-0.2	-0.25	-0.38	-0.05	-0.22	-0.09	0.22
YBR290W	YBR290W || BSD2 (1)		-0.65	-0.54	-0.32		-0.49	-0.56	-0.81	0.19	0.33	0.18	-0.07
YBR291C	YBR291C || CTP1 (1)	0.74	0.8	0.45	0.77	1.2	0.55	1.2	0.63	0.14	0.22	0.72	0.73
YBR292C	YBR292C || (1)	0.42				0.51				-0.32	0.14	0.32	0.12
YBR293W	YBR293W || VBA2 (1)	0.02	0.32	0.15	-0.34	-0.2	-0.29	-0.19	-0.02	-0.22	0.01	-0.41	0.03
YBR294W	YBR294W || SUL1 (1)									-0.62	1.14	1	-0.4
YBR295W	YBR295W || PCA1 (1)	0.02	0.78	0.09	0.13	0.27	-0.2	0	0.9	-0.37	0.7	0.73	0.61
YBR296C	YBR296C || PHO89 (1)	0.33	0.67	-1.63	2.06	-1.48	-1.24	0.18	1.21	-2.58	2.98	-1.78	-1.84
YBR297W	YBR297W || MAL33 (1)	0.08	1.13	0.8	0.47	-0.44	0.27	0.11	0.61	-0.7	0.53	0.63	-0.15
YBR298C	YBR298C || MAL31 (1)	0.44	1.24	0.05	0.31	0.32	0.16	0.21	0.37	0.29	0.29	0.88	-0.16
YBR299W	YBR299W || MAL32 (1)									-0.01	0.71	1.58	0.12
YBR300C	YBR300C || (1)	0.14	0.64	0.16	0.03		0.26			-1.23	0.16	-0.71	-0.46
YBR301W	YBR301W || DAN3 (1)	-0.14	-0.15	0.14	0.08	0.03	0.01	-0.61	0.22	-0.09	0.58	0.37	0.11
YBR302C	YBR302C || COS2 (1)	0.02	0.53	-0.25	0.22	-0.41	0.48	-0.04	0.51	0.86	1.11	0.55	0.16
YCL001W	YCL001W || RER1 (1)	0.01	0.04	0.15	-0.09	-0.1	0.19	-0.02	-0.25	0.21	-0.03	-0.25	0.4
YCL001W-A	YCL001W-A || (1)		-0.03	0.08	-0.25					0.78	0.47		0.25
YCL001W-B	YCL001W-B || (1)									0.59	0.4	-0.28	0.88
YCL002C	YCL002C || (1)	0.25	0.16	0.29	0.22	0.15	0.49	0.31	0.15	-0.02	-0.32	-0.44	0.23
YCL004W	YCL004W || PGS1 (1)	0.29	0.27	0.18	0.04	0.21	0.33	0.32	-0.24	0.01	0.09	-0.11	0.11
YCL005W	YCL005W || (1)	0.15	-0.12	0.25	0.09	0.03	0.35	0.29	-0.05	-0.24	-0.37	-0.29	0.13
YCL007C	YCL007C || (1)	-0.07	0.18	-0.09	0.09	-0.08	0.01	-0.04	-1.07	-1.79	-0.26	-0.12	0.89
YCL008C	YCL008C || STP22 (1)	0.35	0.37	0.24	0.17	0.56	0.04	-0.16	-0.6	0.16	-0.2	-0.25	-0.32
YCL009C	YCL009C || ILV6 (1)	-0.4	-0.63	-0.33	-0.44	-0.21	-0.72	-0.45	-0.26	-0.8	-0.16	0.17	-0.69
YCL010C	YCL010C || SGF29 (1)	1.52	1.55	1.43	1.2	1.75	1.17	1.21	-0.26	0.43	0.2	-0.18	-1.24
YCL011C	YCL011C || GBP2 (1)	-0.28	-0.37	-0.32	-0.5	-0.39	-0.39	-0.54	-0.33	0.06	-0.25	-0.41	-0.72
YCL014W	YCL014W || BUD3 (1)	0.08	0.02	0.07	0.26	-0.08	0.22	0.14	0.17	-0.34	0.09	0.17	0.95
YCL016C	YCL016C || DCC1 (1)		-0.08	-0.76	-0.47			-0.34		-0.26	-0.03	-0.17	-0.17
YCL017C	YCL017C || NFS1 (1)	-0.25	-0.34	-0.21	-0.13	-0.05	-0.18	-0.15	-0.08	0.08	-0.06	0.06	0.46
YCL018W	YCL018W || LEU2 (1)	0.03	-0.27	0.04	-0.14	-0.3	0.23	0.52	0	-1.4	-0.16	-1.39	-0.64
YCL021W-A	YCL021W-A || (1)	-0.31	-0.83	-0.01	0.21	-0.2	0.16	0.07	0.06	-1.12	0.51	0.11	-0.98
YCL022C	YCL022C || (1)	-0.85	-1.21	-1.23	-1.03	-1.12	-0.98	-1.21		-0.04	-0.39	0	-0.27
YCL023C	YCL023C || (1)	0.04	0.11	0.47	-0.04	-0.1	0.4	0.08	0.53	-0.43	0.62	-0.23	-0.03
YCL024W	YCL024W || KCC4 (1)									-0.08	-0.33	-0.22	-0.41
YCL025C	YCL025C || AGP1 (1)	0.06	-0.08	1.07	-0.1	-0.42	-0.79	-0.64	-0.4	-0.21	-1.24	-1.31	-1.05
YCL026C-A	YCL026C-A || FRM2 (1)		-0.73	0.28	-0.02		-0.38	-0.37	1.36	-0.87	0.03	-1.02	0.52
YCL026C-B	YCL026C-B || (1)	-0.33	-0.13	-0.47	-0.17	0.01	-0.49	-0.42	-0.28	-0.25	0.25	0.5	0.6
YCL027W	YCL027W || FUS1 (1)	0.31	-0.65	-0.1	-0.47	0.03	0.4	-0.27	-0.04	-0.61	0.15	2.76	-1.02
YCL028W	YCL028W || RNQ1 (1)	-0.56	-0.42	-0.52	-0.52	-0.63	-0.59	-0.82	-0.15	0.13	-0.18	-0.08	-0.74
YCL029C	YCL029C || BIK1 (1)	0.16	0.15	0.51	0.34	0.45	-0.37	0.06	-0.1	0.25	0.12	-0.4	0.06
YCL030C	YCL030C || HIS4 (1)	-0.1	-0.15	0.91	-0.26	0.04	-1.08	0.66	1.1	-1.6	0.77	-1.43	-0.64
YCL031C	YCL031C || RRP7 (1)	-0.11	-0.31	0.03	-0.24	-0.2	0.04	-0.03	0.1	-0.06	-0.24	-0.39	0.21
YCL032W	YCL032W || STE50 (1)	-0.23	-0.03	0.44	0.04	0.05	0.3	0.07	0.22	-0.13	0.28	0.15	-0.01
YCL033C	YCL033C || (1)	-0.35	0.17	-0.11	-0.14	-0.21	0.02	-0.02	0.47	0.25	0.06	0.74	0.21
YCL034W	YCL034W || LSB5 (1)	-0.14	-0.33	-0.3	-0.5	-0.34	-0.35	-0.68	-0.65	0.01	-0.29	-0.07	-0.41
YCL035C	YCL035C || GRX1 (1)	0.43	0.82	0.46	0.54	0.53	0.56	0.39	0.09	-0.02	0.39	0.66	1.12
YCL036W	YCL036W || GFD2 (1)	-0.29	-0.84	-0.89	-0.33	-0.53	-0.39	-0.28	-0.29	-0.1	-1.36	-1.21	-1.53
YCL037C	YCL037C || SRO9 (1)	1.43	1.36	0.98	1.23	1.18	1.09	1.14	-0.53	-0.6	-0.46	-0.93	1.62
YCL038C	YCL038C || ATG22 (1)	0	0.1	0.2	0.24	-0.22	0.06	-0.01	1.31	-0.63	0.45	1.06	1.96
YCL039W	YCL039W || GID7 (1)	0.15	-0.38	0.41	0.29			0.22		-0.44	-0.08	-0.25	-0.02
YCL040W	YCL040W || GLK1 (1)	0.24	0.18	-0.78	-0.33	0.11	-0.76	-0.65	-0.6	1.02	0.59	1.51	-0.81
YCL041C	YCL041C || (1)						-0.59			-0.28	0.28	0.27	1.04
YCL042W	YCL042W || (1)	-0.56	-0.38	-0.5	-0.48			-0.61		-0.15	-0.09
YCL043C	YCL043C || PDI1 (1)	-0.26	-0.19	-0.44	0.08	-0.14	-0.34	0.02	0.03	0.47	0.36	0.15	-0.1
YCL044C	YCL044C || (1)	-0.42	-0.46	-0.54	-0.05	-0.17	-0.6	-0.34	-0.62	-0.54	-0.24	-0.39	-0.57
YCL045C	YCL045C || (1)	-0.12	-0.03	-0.21	-0.2	-0.24	0.2	-0.32	-0.28	-0.04	-0.04	-0.54	-0.06
YCL046W	YCL046W || (1)							-0.69		-0.19	0.34	0.09	0.81
YCL047C	YCL047C || (1)	0.1	-0.01	0.05	0.26	0.01	0.57	0.43	0.16	-0.56	-0.45	-0.44	0.24
YCL048W	YCL048W || SPS22 (1)								0.85	0.13	1.3	1.48	0.51
YCL049C	YCL049C || (1)	-0.43	0.05	0.49	0.15	0.16	0.37	0.31	0.63	-0.3	0.64	1.09	0.21
YCL050C	YCL050C || APA1 (1)	-0.22	-0.3	-0.08	-0.05	-0.18	-0.02	-0.19	0.13	-0.58	-0.08	-0.69	-0.28
YCL051W	YCL051W || LRE1 (1)	0.18	0.29	0.04	0.12	0.3	-0.11	-0.01	-0.15	-0.09	-0.02	-0.3	0.2
YCL052C	YCL052C || PBN1 (1)	0.06	0.26	0.3	0.04	0.09	0.06	0.12	-0.09	0.26	0.3	0.2	0.18
YCL054W	YCL054W || SPB1 (1)	0.01	0.16	-0.08	0.3	-0.06	0.14	0.17	0.38	-0.21	-0.05	-0.58	-0.23
YCL055W	YCL055W || KAR4 (1)	0.47	0.39	0.73	0.19	0.18	0.74	0.46	0.1	-0.39	0.01	0.8	-0.03
YCL056C	YCL056C || (1)	-0.82	-0.68	-0.66	-0.64	-0.79	-0.64	-0.6		-0.28	0.07	0.16	-0.34
YCL057C-A	YCL057C-A || (1)	0.12	0.36	0	0.07	0.34	0.25	0.37	-1.24	0.3	-0.2	0.47	0.73
YCL057W	YCL057W || PRD1 (1)	-0.09	0.07	-0.15	-0.04	0.11	0.01	-0.04	0.07	-0.03	0.23	-0.1	-0.5
YCL058C	YCL058C || FYV5 (1)									0.1	0.14		0.05
YCL059C	YCL059C || KRR1 (1)	0.12	0.04	0.06	0.39	-0.07	0.24	0.08	0.06	-0.02	-0.17	-0.53	-0.13
YCL061C	YCL061C || MRC1 (1)	0.24	0.04	0.41	0.42				0.03	-0.18	-0.3	-0.35	-0.49
YCL063W	YCL063W || VAC17 (1)	-0.11	0.1	-0.2	-0.17	-0.41	-0.36	-0.46	0.09	-0.16	-0.11	-0.75	0.37
YCL064C	YCL064C || CHA1 (1)	-0.19	-1.26	-0.49	0.13	0.27	0.39	-0.49	1.66	-1.82	0.89	0.63	1.1
YCL065W	YCL065W || (1)			0.95			0.52			0.02		-0.28	-0.15
YCL066W	YCL066W || HMLALPHA1 (1)	0.34	0.19	0.23	0.19	0.16	0.24	0.37	-0.36	-0.47	-0.05	0.17	-0.07
YCL067C	YCL067C || HMLALPHA2 (1)	-0.31	-0.29	-0.18	-0.33	-0.42	-0.33	-0.2	-0.13	-0.24	-0.3	0	-0.2
YCL068C	YCL068C || (1)	0.96	1.24	0.83	0.59	1.45	0.86	1.17	-0.41	0.5	0.12	0	-0.06
YCL069W	YCL069W || VBA3 (1)	0.24	0.57	0.27	0.86	1.13	0.42	0.59		-0.34		0.09
YCL073C	YCL073C || (1)	0.59	0.7	0.56	0.84	1.06	0.76	1.6	-0.07	0.7	-0.17	0.46	0.66
YCR001W	YCR001W || (1)	0.04	0.14	-0.17	-0.25	-0.09	0.02	-0.22		-0.26	0.11	-0.48	-0.23
YCR002C	YCR002C || CDC10 (1)	0.06	0.17	0.47	0.2	0.12	0.32	0.08	0.04	-0.03	0.35	0.13	0.02
YCR003W	YCR003W || MRPL32 (1)	0.22	0.09	0.09	-0.27	0.29	0.16	0.39	-0.2	0.5	-0.08	0.62	0.34
YCR004C	YCR004C || YCP4 (1)	-0.45	-0.59	-0.94	-0.56	-0.71	-0.55	-0.58	-0.24	0.4	0.13	0.35	-0.26
YCR005C	YCR005C || CIT2 (1)	0.19	0.95	1.06	0.62	0.84	0.63	0.5	0.59	-0.15	0.19	0.86	0.64
YCR006C	YCR006C || (1)									0.81	0.12	0.22	0.14
YCR007C	YCR007C || (1)	-0.41	-0.41	-0.18	-0.01	0.08	0.06	-0.01	-0.02	0.01	1.82	0.6	-0.13
YCR008W	YCR008W || SAT4 (1)	-0.13	-0.02	-0.07	0.21	0.11	0.07	0.15	-0.52	0.06	-0.41	-0.39	-0.34
YCR009C	YCR009C || RVS161 (1)	0.15	-0.03	0.2	-0.08	-0.16	-0.19	-0.24	0.24	0.01	0.22	0.18	0.39
YCR010C	YCR010C || ADY2 (1)				0.43					0.74	0.82	2.62	-0.05
YCR011C	YCR011C || ADP1 (1)	-0.04	-0.11	-0.15	-0.15	-0.21	-0.19	-0.18	-0.05	-0.01	0.11	-0.09	-0.42
YCR012W	YCR012W || PGK1 (1)	-0.62	-0.59	-0.61	-0.68	-0.66	-0.65	-0.6	0.41	0.08	-0.06	0.13	1.53
YCR013C	YCR013C || (1)	-1.12	-1.1	-0.98	-0.95	-1.09	-0.96	-0.91		-0.94	-0.76	-0.91	-0.02
YCR014C	YCR014C || POL4 (1)	-0.22	0.67	0.53	0.33				0.48	-0.32	-0.31	-0.1	0.87
YCR015C	YCR015C || (1)	0.31	0.32	0.53	0.57	0.43	0.02	0.59	0.7	-0.06	0.64	0.21	-0.09
YCR016W	YCR016W || (1)	-0.46	-0.57	-0.29	-0.27	-0.51	-0.39	-0.35	0.03	-0.16	-0.24	-0.76	-0.24
YCR017C	YCR017C || CWH43 (1)	0.11	0.06	0.07	0.11	0.07	0.21	0.14	0.18	-0.13	0.06	0.07	-0.32
YCR018C	YCR018C || SRD1 (1)	-0.82	-0.81	-0.36	-0.55		-0.6	-0.72		-0.4	0.05	-0.22	-0.87
YCR018C-A	YCR018C-A || (1)	-0.24		-0.23						0.42	0.22	0.01	0.51
YCR019W	YCR019W || MAK32 (1)	-0.31	-0.33	-0.23	-0.24	-0.39	-0.34	-0.57	-0.29	-0.27	-0.19	-0.55	-0.39
YCR020C	YCR020C || PET18 (1)	-0.27	0.27	-0.2	-0.32	-0.32	-0.19	-0.14	0.56	-0.05	0.24	0.02	0.16
YCR020C-A	YCR020C-A || MAK31 (1)	-0.16	-0.09	0.42	-0.06	-0.19	-0.01	0.15	-0.13	-0.29	-0.21	0.2	0.98
YCR020W-B	YCR020W-B || HTL1 (1)	0.68	0.46	0.44	0.49		0.04	0.38	-0.05	-0.33	-0.05	-0.27	0.16
YCR021C	YCR021C || HSP30 (1)	0.89	1.74	0.97	2.64	2.14	2.13	1.16	-0.12	-0.49	1.44	0.96	0.27
YCR022C	YCR022C || (1)	0.3	0.24	0.83	0.72				-0.23	-0.23	-0.14	-0.3	-0.15
YCR023C	YCR023C || (1)	0.23	0.14	0.44	0.16	0.28	0.37	0.18	-0.11	-0.06	-0.41	-0.61	0.92
YCR024C	YCR024C || SLM5 (1)	-0.03	0	-0.57	0.01	0.26	-0.4	0.18	-0.02	-0.24	-0.23	0.58	0.01
YCR024C-A	YCR024C-A || PMP1 (1)	-0.13	0.03	-0.08	0.08	-0.28	-0.01	-0.17	0.29	-0.15	-0.49	0.18	2.47
YCR025C	YCR025C || (1)	-0.99	-0.62	-0.67	-0.85		-0.47	-1.11	-0.55	0.14	-0.66	-0.91	0.72
YCR026C	YCR026C || (1)	-0.24	-0.44	-0.34	-0.22	-0.18	-0.34	-0.24	-0.12	-0.22	0.17	-0.22	-0.48
YCR027C	YCR027C || RHB1 (1)	0.15	-0.02	0.17	-0.06	0.2	0.01	0.1	0.09	-0.07	-0.02	-0.15	-0.14
YCR028C	YCR028C || FEN2 (1)	0.38	0.1	0.11	0.29	0.13	0.36	0.45	-0.06	0.2	0.26	-0.58	0.95
YCR028C-A	YCR028C-A || RIM1 (1)	0.23	0.4	0.42	0.28	0.34	0.45	0.43	-0.41	-0.13	-0.07	0.04	0.44
YCR030C	YCR030C || SYP1 (1)	0.07	0.12	0.08	0.15	0.39	-0.12	0.18	-0.14	0.18	0.21	0.54	0.04
YCR031C	YCR031C || RPS14A (1)	0.61	0.69	0.56	0.73	0.72	0.76	0.71	-0.31	0.06	0.11	0.1	1.33
YCR032W	YCR032W || BPH1 (1)	-0.1	-0.06	-0.04	-0.19	-0.16	-0.35	-0.07	0.27	-0.26	-0.06	-0.01	-0.43
YCR033W	YCR033W || SNT1 (1)	-0.12	-0.27	-0.26	-0.25	-0.46	-0.44	-0.52	-0.41	0.06	-0.47	-0.64	-0.47
YCR034W	YCR034W || FEN1 (1)	0.08	-0.07	0.2	-0.04	0.07	0.14	0.18	-0.56	0.18	0.01	-0.08	0.56
YCR035C	YCR035C || RRP43 (1)	-0.51	-0.74	-0.32	-0.23	-0.68	-0.58	-0.41	0.15	-0.05	-0.23	-0.76	-0.45
YCR036W	YCR036W || RBK1 (1)	-0.03	0.2	0.36	0.02	0.1	0.12	0.12	0.68	-0.05	0.36	0.89	0.16
YCR037C	YCR037C || PHO87 (1)	0.14	0.06	0.6	0.27	0.4	0.63	0.1	0.05	1.26	0.42	0.3	0.8
YCR038C	YCR038C || BUD5 (1)	0.31	0.2	0.34	0.32	0.19	0.13	0.4	-0.58	0.15	0.01	-0.04	-0.08
YCR038W-A	YCR038W-A || (1)		0.06	0.55			0.34	0.29		-0.54	0.12	0.24	0.24
YCR039C	YCR039C || MATALPHA2 (1)	-0.27	-0.24	-0.18	-0.35	-0.43	-0.25	-0.18	0.05	-0.21	-0.26	0.03	-0.17
YCR040W	YCR040W || MATALPHA1 (1)	0.14	0.05	0.24	0.25	0.02	0.58	0.28	-0.26	-0.43	-0.03	0.21	-0.07
YCR041W	YCR041W || (1)	-0.69	-0.77	-0.81	-0.83	-0.66	-0.83	-0.71	-0.65	-0.32	-0.18	-0.03	-0.14
YCR042C	YCR042C || TAF2 (1)	0.17	0.2	0.09	0.08	0.16	0.01	0.15	0.14	-0.05	0.14	0.17	-0.05
YCR043C	YCR043C || (1)	0.34	0.45	0.53	0.42	0.33	0.48	0.39	0.26	-0.52	-0.58	-0.39	0.4
YCR044C	YCR044C || PER1 (1)	-0.68	-0.71	-0.69	-0.97	-0.82	-0.63	-0.65	0.03	0.06	0.06	-0.25	0.23
YCR045C	YCR045C || (1)			0.71	-0.28					-0.44	0.26	0.48	-0.03
YCR046C	YCR046C || IMG1 (1)	-0.32	-0.3	-0.71	-0.67	-0.16	-0.85	-0.37	-1.01	0.58	-0.26	0.44	-0.23
YCR047C	YCR047C || BUD23 (1)	-0.94	-1.23	-1.11	-0.91	-1.17	-1.08	-1.01	-0.23	-0.29	-0.61	-0.87	-1.17
YCR048W	YCR048W || ARE1 (1)	-0.4	-0.44	-0.32	-0.26	-0.34	-0.54	-0.35	-0.31	-0.51	-0.27	-0.75	-0.27
YCR049C	YCR049C || (1)	-0.02	0.11	-0.11	-0.24		0.54	-0.08		0.05	-0.24	-0.48	-0.4
YCR050C	YCR050C || (1)	-1.36	-1.53	-1.33	-1.33	-1.25	-1.5	-1.4	-0.77	-0.87	-0.42	-0.28	-0.36
YCR051W	YCR051W || (1)	-0.27	-0.24	-0.54	-0.2	-0.24	-0.43	-0.33	-0.38	-0.16	-0.25	-0.53	-0.67
YCR052W	YCR052W || RSC6 (1)	-0.98	-1.15	-1.1	-1.18	-1.23	-1.3	-1.43	-0.76	-0.23	-0.44	-0.66	-1.08
YCR053W	YCR053W || THR4 (1)	-0.08	-0.05	-0.08	-0.1	-0.13	-0.21	-0.13	0	-0.43	-0.01	-0.71	-0.4
YCR054C	YCR054C || CTR86 (1)	0.82	0.2	0.74	0.72		0.56			0.04	-0.11	-0.15	-0.18
YCR057C	YCR057C || PWP2 (1)	0.17	-0.03	0.07	0.33	0.21	0.19	0.04	-0.53	-0.15	-0.3	-0.78	0.05
YCR059C	YCR059C || YIH1 (1)	-0.43	-0.39	-0.69	-0.26	-0.31	-0.41	-0.31	0.17	-0.25	-0.28	-0.22	-0.81
YCR060W	YCR060W || TAH1 (1)	0.14	0.27	0.59	0.38	0.22	0.55	0.48	0.64	-0.43	-0.26	0.26	0.02
YCR061W	YCR061W || (1)	-0.02	-0.21	-0.01	-0.1	0	0.15	-0.05	-0.64	0.62	-0.59	-0.12	-0.23
YCR063W	YCR063W || BUD31 (1)	-0.24	-0.12	-0.01	-0.12	-0.24	-0.02	-0.04	0.31	0.24	-0.36	-0.61	0.41
YCR064C	YCR064C || (1)	1.12			0.5					0.26	-0.24	0.15	0.73
YCR065W	YCR065W || HCM1 (1)	0.67	0.42	0.72	0.24	0.32	0.05	0.43	-0.24	0.08	0	0.02	2.15
YCR066W	YCR066W || RAD18 (1)	-0.4	0.13	0.35	-0.07	0	0.32	0.22	0.24	-0.13	-0.02	-0.07	-0.21
YCR067C	YCR067C || SED4 (1)	-0.2	-0.3	-0.2	-0.16	-0.07	-0.22	-0.27	-0.31	-0.01	0.07	0	-0.02
YCR068W	YCR068W || ATG15 (1)	-0.25	-0.09	-0.29	-0.2	-0.15	-0.43	-0.37		1.09	0.38	0.16	-0.26
YCR069W	YCR069W || CPR4 (1)	-0.44	-0.44	-0.26	-0.58	-0.33	-0.47	-0.47	-0.06	-0.15	-0.01	-0.16	-0.23
YCR071C	YCR071C || IMG2 (1)	0.18	0.14	-0.06	-0.17	0.26	-0.33	-0.02	-0.81	0.4	-0.03	0.27	-0.06
YCR072C	YCR072C || (1)	-0.31	-0.39	-0.45	-0.1	-0.17	-0.16	-0.32	-0.03	-0.32	-0.55	-1.01	-0.76
YCR073C	YCR073C || SSK22 (1)	0.14	-0.04	0.33	0.16	0.51	0.2	0.51	1.25	-0.86	0.42	1.25	0.19
YCR073W-A	YCR073W-A || SOL2 (1)	-0.21	-0.23	0.06	-0.29	-0.22	-0.53	-0.6	-0.42	0.28	-0.04	0.44	-0.66
YCR075C	YCR075C || ERS1 (1)	-0.03	0.05	-0.08	-0.27	-0.26	0.07	-0.27	-0.24	0.38	0.07	0.1	-0.15
YCR076C	YCR076C || (1)	-0.45	-0.42	-0.49	-0.51	-0.68	-0.49	-0.47	-0.15	-0.46	0.16	-0.08	-0.53
YCR077C	YCR077C || PAT1 (1)	-0.37	-0.57	-0.72	-0.72	-0.58	-0.74	-0.84	-0.57	-0.21	-0.46	-0.33	0.73
YCR079W	YCR079W || (1)	-0.37	-0.2	-0.28	-0.32	-0.35	-0.57	-0.41	-0.6	0.17	-0.07	0.35	0.26
YCR081W	YCR081W || SRB8 (1)	0.32	0.3	0.34	0.34	0.28	0.42	0.24	0.11	0.27	-0.15	-0.25	-0.18
YCR082W	YCR082W || (1)	0.1	0.22	0.13	0.13	-0.07	0.17	0.25	0.08	0.13	0.1	0.06	0.21
YCR083W	YCR083W || TRX3 (1)	-0.43	-0.04	-0.47	0	-0.3	-0.2	0	-0.13	0.22	0.46	0.8	1.28
YCR084C	YCR084C || TUP1 (1)	0.09	-0.02	-0.46	-0.22	-0.2	-0.42	-0.37	-0.72	0.11	-0.26	-0.18	-0.48
YCR086W	YCR086W || CSM1 (1)	-0.27	0.06	-0.05	-0.18	-0.07	0.19	-0.11	-0.11	-0.27	-0.06	0.03	0.16
YCR087C-A	YCR087C-A || (1)	-0.59	-0.43	-0.49	-0.28	-0.76	-0.4	-0.71	0.25	-0.04	-0.37	-0.55	-0.69
YCR087W	YCR087W || (1)	-1.27	-1.06	-1.21	-0.85	-1.3	-0.82	-0.99		-0.1	-0.63	-0.59	-0.31
YCR088W	YCR088W || ABP1 (1)	-0.29	-0.23	-0.29	-0.55	-0.04	-0.78	-0.84	-0.64	-0.17	0.48	0.35	-0.74
YCR089W	YCR089W || FIG2 (1)	0.32	-0.01	0.16	0.02	0.37	0.35	0.05	-0.52	0.35	0.34	1.41	-0.29
YCR090C	YCR090C || (1)	0.3	0.19	0.43	0.25	0.06	0.33	0.24	0.04	-0.8	-0.35	-0.57	0
YCR091W	YCR091W || KIN82 (1)	-0.15	-0.35	-0.1	-0.41	-0.33	-0.5	-0.33	-0.28	0	0.39	0.81	-0.24
YCR092C	YCR092C || MSH3 (1)	-0.36	-0.41	-0.33	-0.49	-0.56	-0.38	-0.55	-0.43	0.05	-0.23	-0.32	-0.37
YCR093W	YCR093W || CDC39 (1)	0.15	0.21	-0.08	0	0.4	-0.12	-0.11	-0.65	0.02	-0.13	-0.17	0.11
YCR094W	YCR094W || CDC50 (1)	0.39	0.38	0.07	0.34	0.31	0.43	0.27	-0.17	-0.22	0.37	-0.14	-0.16
YCR095C	YCR095C || (1)	-0.06	-0.22	0.05	0.01	-0.32	0.01	-0.12	0.15	-0.24	0.05	-0.1	-0.27
YCR096C	YCR096C || HMRA2 (1)	-0.28	-0.25	-0.2	-0.39	-0.43	-0.26	-0.2	-0.15	-0.25	-0.3	0.01	-0.22
YCR097W	YCR097W || HMRA1 (1)	0	-0.14	0.05	-0.12	-0.26	-0.19	0.06	0.2	-0.37	0.3	0.75	0.39
YCR097W-A	YCR097W-A || (1)	-0.04	-0.15	-0.12	-0.28	-0.16	0.04	-0.08	-0.73	-0.23	-0.11	-0.05	-0.15
YCR098C	YCR098C || GIT1 (1)	-0.06	-0.16	-0.82	-0.79	-1	-1.99	-1.51	-0.3	-3.16	-0.79	0.39	-1.66
YCR099C	YCR099C || (1)	-0.3			0.15					-0.63	-0.15	1.48	-0.35
YCR100C	YCR100C || (1)	0.25	0.22	-0.04	0.35	0.61	0	0.46	1.76	-0.37	-0.22	1.38	0.01
YCR101C	YCR101C || (1)		2.09	1.69	1.29				2.39	0.23	0.52	1.86	-0.05
YCR102C	YCR102C || (1)									-0.63	0.17	-0.13	1.37
YCR102W-A	YCR102W-A || (1)									-0.07			0.58
YCR104W	YCR104W || PAU3 (1)	-0.25	-0.36	0.12	0.06	-0.14	-0.23	-0.53	-0.2	-0.11	0.58	0.66	0.17
YCR105W	YCR105W || ADH7 (1)									-0.47	0.63	0.28	0.29
YCR106W	YCR106W || RDS1 (1)	1.37	1.1	1.1	0.83	1.47	0.93	0.21	-0.36	-0.47	0.23	-0.44	0.4
YCR107W	YCR107W || AAD3 (1)		-0.17	-0.09	-0.3			0.08		0.49	-0.09	-0.46	0.31
YDL001W	YDL001W || RMD1 (1)	0.13	-0.15	-0.12	-0.05	-0.18	0.14	-0.36	-0.13	0.12	-0.07	-0.17	-0.19
YDL002C	YDL002C || NHP10 (1)	-0.04	-0.12	-0.11	-0.26	-0.08	-0.17	-0.05	0.17	0.04	-0.06	-0.3	-0.05
YDL003W	YDL003W || MCD1 (1)	0.18	-0.1	-0.05	-0.06	-0.05	-0.03	-0.14	-0.35	0.08	-0.24	-0.34	-0.11
YDL004W	YDL004W || ATP16 (1)	0.72	0.58	0.36	0.56	0.8	0.58	0.74	-0.76	0.25	0.03	0.74	0.65
YDL005C	YDL005C || MED2 (1)	-0.29	-0.45	-0.06	0.08	-0.4	0.06	-0.53	0.02	0.23	-0.03	-0.09	-0.3
YDL006W	YDL006W || PTC1 (1)	0.78	0.65	0.98	0.75	0.78	1.12	0.94	0.57	-0.23	-0.23	-0.29	-0.16
YDL007W	YDL007W || RPT2 (1)	0.18	0.33	-0.02	0.44	0.28	0.26	0.3	0.2	0.07	0.51	-0.01	-0.2
YDL008W	YDL008W || APC11 (1)	0	0.27	0.22	0.14	0.05	0.37	0.19	-0.64	-0.29	-0.23	-0.52	0.35
YDL009C	YDL009C || (1)	-0.79	-0.91	-0.64	-0.8	-0.69	-0.63	-0.76		0.08	0.15	-0.04	0.01
YDL010W	YDL010W || (1)	0.18	0.02	0.3	0.25	0.29	0.27	0.09	-0.08	-0.1	0.39	0.2	0.25
YDL011C	YDL011C || (1)	0.08	-0.56	0.05			0.36	-0.42		0.1	0.03	-0.08	-0.08
YDL012C	YDL012C || (1)	-0.2	-0.36	-0.17	-0.29	-0.41	-0.33	-0.43	-0.56	-0.11	-0.09	-0.3	0.1
YDL013W	YDL013W || HEX3 (1)	0.37	0.31	0.25	0.11	0.32	0.2	0.14	0.05	0.01	0.05	-0.21	-0.37
YDL014W	YDL014W || NOP1 (1)	0.13	0.03	-0.24	0.1	0.03	-0.09	-0.06	-0.72	-0.31	-0.61	-0.67	-0.15
YDL015C	YDL015C || TSC13 (1)	0.36	0.38	0.44	0.3	0.39	0.55	0.46	0.35	-0.13	-0.14	-0.23	0.19
YDL016C	YDL016C || (1)	-1.02	-0.65	-0.96	-1.21	-0.93	-1.07	-1.03		0.21
YDL017W	YDL017W || CDC7 (1)	1.08	0.83	0.61	0.47	1.28	0.77	0.66	0.05	-0.13	0.17	0.05	-0.16
YDL018C	YDL018C || ERP3 (1)	-0.26	-0.37	-0.2	-0.37	-0.3	-0.14	-0.32	-0.34	0.14	-0.08	0.26	0.1
YDL019C	YDL019C || OSH2 (1)	0	0.02	-0.3	-0.27	0.34	-0.15	0.15	0.01	-0.04	-0.34	-0.05	-0.51
YDL020C	YDL020C || RPN4 (1)	0.5	0.9	0.94	0.98	0.66	0.79	0.55	0.13	0.15	0.89	0.57	0.36
YDL021W	YDL021W || GPM2 (1)	0.02	0.09	-0.06	0.12	-0.21	0.54	-0.44	1.38	0.62	0.72	1.67	0.37
YDL022W	YDL022W || GPD1 (1)	0.22	0.06	-1.17	-0.19	0.24	-0.15	-0.39	-1.24	1	0.16	0.74	-0.08
YDL023C	YDL023C || (1)	-0.88	-0.89	-1.51	-0.7	-0.49	-0.78	-1.17		0.21	-0.69	-0.06	-0.49
YDL024C	YDL024C || DIA3 (1)	0.26	0.76	0.36	0.95	0.57	1.18	1.23	1.61	-0.51	1.15	0.76	0.79
YDL025C	YDL025C || (1)	0.35	0.38	0.34	0.43	0.52	0.23	0.61	-0.27	0.12	0.34	0.32	0.14
YDL026W	YDL026W || (1)		0.2	-0.39	-0.1					0.17	-0.02	0.28	0.1
YDL027C	YDL027C || (1)	0	0.37	0.17	0.13	-0.14	-0.03	-0.18	0.27	0.4	0.39	0.77	0.47
YDL028C	YDL028C || MPS1 (1)	-0.38	-0.55	-0.44	-0.46	-0.48	-0.38	-0.62	-0.19	0.06	-0.18	-0.26	-0.34
YDL029W	YDL029W || ARP2 (1)	0.58	0.29	0.78	0.08	0.29	0.21	0.27	0.15	-0.04	0.48	0.46	0.19
YDL030W	YDL030W || PRP9 (1)	-0.32	-0.34	-0.04	-0.12	-0.5	-0.12	-0.27	-0.48	-0.12	-0.3	-0.64	-0.08
YDL031W	YDL031W || DBP10 (1)	0.01	0.11	-0.11	0.17	-0.1	0.1	0.07	-0.09	-0.11	-0.19	-0.79	-0.21
YDL032W	YDL032W || (1)									-0.25	-0.14	0.82	-0.15
YDL033C	YDL033C || SLM3 (1)	-0.54	-0.53	-0.41	-0.53	-0.48	-0.4	-0.5	-0.36	-0.06	-0.45	-0.41	-0.31
YDL034W	YDL034W || (1)									-0.86	0.26	0
YDL035C	YDL035C || GPR1 (1)	-0.25	0.32	0.32	0.43		0.01		-0.14	-0.12	0.14	-0.01	-0.1
YDL036C	YDL036C || (1)	-0.27	-0.35	-0.06	-0.4	-0.4	-0.39	-0.41	-0.58	-0.22	-0.32	-0.84	-0.58
YDL037C	YDL037C || BSC1 (1)									0.47
YDL038C	YDL038C || (1)	0.13	0.74	0.13	0.63	0.5	0.27	1.13	1.5	-0.24	-0.37	-0.16	-0.54
YDL039C	YDL039C || PRM7 (1)	0.7	0.99	0.43	0.35	1.19	0.7	1.21	1.21	-0.12	-0.21	0.19	-0.57
YDL040C	YDL040C || NAT1 (1)	-0.21	-0.25	-0.33	-0.03	-0.26	-0.07	-0.23	-0.35	-0.23	-0.56	-0.65	-0.69
YDL041W	YDL041W || (1)								0.33	-0.26	0.08	-0.63	0.3
YDL042C	YDL042C || SIR2 (1)	-0.12	-0.63	-0.35	-0.11	-0.62	-1.25	-0.54	-0.23	-0.49	-0.49	-0.64	-0.44
YDL043C	YDL043C || PRP11 (1)	-0.29	-0.45	-0.33	-0.16	-0.04	-0.39	-0.27	-0.07	-0.36	-0.29	-0.34	-0.41
YDL044C	YDL044C || MTF2 (1)	0.46	0.25	0.25	0.21		0.29	0.46		0.27	-0.12	0.19	0.03
YDL045C	YDL045C || FAD1 (1)	-0.11	0.11	0.54	0.14	0.19	0.19	0.06	0.38	0.21	0.55	0.53	0.3
YDL045W-A	YDL045W-A || MRP10 (1)	0.72	0.62	0.56	0.42	0.64	0.53	0.85	-0.92	0.55	0.26	0.13	0.33
YDL046W	YDL046W || (1)	0.34	0.98	0.52	0.55	0.47	0.28	0.52	-0.15	0.22	0.36	0.4	0.43
YDL047W	YDL047W || SIT4 (1)	0.26	0.17	0	0.17	0.28	0.11	0.07	-0.74	-0.04	-0.57	-0.44	0.06
YDL048C	YDL048C || STP4 (1)	-0.09	-0.15	-0.15	-0.1	0.48	-0.43	-0.53	0.22	-0.07	-0.57	0.02	0.83
YDL049C	YDL049C || KNH1 (1)	0.28	0.1	0.93	0.24	0.46	0.21	0.16	0.48	-0.19	-0.14	0.67	0.64
YDL050C	YDL050C || (1)	-0.86	-0.89	-0.89	-0.57	-0.89	-0.61	-0.62		-0.12	-0.45	-0.71	-0.33
YDL051W	YDL051W || LHP1 (1)	0.01	-0.29	-0.45	0.11	-0.49	0.21	0.04	0.45	-0.11	-0.43	-0.76	-0.6
YDL052C	YDL052C || SLC1 (1)	-0.02	-0.01	0.1	-0.11	0.04	-0.03	0.03	-0.13	0.25	0.07	-0.11	-0.11
YDL053C	YDL053C || PBP4 (1)	-0.1	0	0.06	0.16	0.12	0.12	0.26	0.13	-0.12	0.36	0.03	0.21
YDL054C	YDL054C || MCH1 (1)	0.53	0.15	0.62	0.38	0.34	0.51	0.42	0.65	0.2	0.45	0.11	0.11
YDL055C	YDL055C || PSA1 (1)	0.26	0.05	0.03	0.04	0.47	0.07	0.37	-0.29	-0.12	-0.27	0.06	0.96
YDL056W	YDL056W || MBP1 (1)	0.15	0.11	-0.13	-0.19	0.03	-0.33	-0.37	-0.23	-0.14	-0.16	-0.19	0
YDL057W	YDL057W || (1)	0.13	0.29	0.23	-0.04	0.47	-0.16	0.25	0.6	-0.22	0.14	0.91	-0.34
YDL058W	YDL058W || USO1 (1)	0.3	0.21	0.31	0.4	0.32	0.25	0.25	0.16	-0.19	-0.13	-0.21	-0.58
YDL059C	YDL059C || RAD59 (1)	0.24	0.15	0.17	0.33	0.15	0.3	-0.07	0.45	-0.25	0.29	0.24	-0.25
YDL060W	YDL060W || TSR1 (1)	-0.21	-0.25	-0.34	-0.13	-0.29	-0.15	-0.24	-0.05	-0.21	-0.2	-0.91	-0.54
YDL061C	YDL061C || RPS29B (1)	-0.16	0	-0.06	-0.06	-0.05	-0.02	0.01	-0.27	-0.25	0.08	0.1	0.71
YDL062W	YDL062W || (1)			-0.02			0.21			-0.07	0.22	0.27	0.59
YDL063C	YDL063C || (1)	0.04	-0.11	0.03	0.11	-0.27	0.19	0.12	-0.27	-0.19	-0.21	-0.99	-0.2
YDL064W	YDL064W || UBC9 (1)	-0.18	-0.17	-0.24	-0.26	-0.24	-0.37	-0.51	-0.55	-0.13	-0.26	-0.29	-0.13
YDL065C	YDL065C || PEX19 (1)	0.38	0.29	0.32	0.52	0.39	0.3	0.25	0.06	-0.2	0.23	0.27	0.33
YDL066W	YDL066W || IDP1 (1)	0.69	0.84	0.83	0.58	0.65	0.58	0.74	0.6	-0.73	-0.18	-0.12	1.99
YDL067C	YDL067C || COX9 (1)	-0.19	-0.04	-0.25	-0.19	-0.05	-0.11	0.04	-0.17	-0.02	-0.1	0.68	0.32
YDL068W	YDL068W || (1)	0.35	0.66	0.31	0.12	1.09	0.82	0.53	-0.63	0.14	0.13	-0.05	-0.08
YDL069C	YDL069C || CBS1 (1)	-0.25	-0.33	-0.2	-0.36	-0.51	-0.11	-0.19	0.5	-0.11	-0.11	-0.24	0.2
YDL070W	YDL070W || BDF2 (1)	0.03	-0.03	-0.54	-0.35	-0.31	-0.77	-0.71	-0.39	-0.21	0.7	-0.19	0.17
YDL071C	YDL071C || (1)	0.54	0.49	0.94	0.67	0.66	0.77	0.74	-0.27	0.34	-0.78	-0.07	-0.09
YDL072C	YDL072C || (1)	0.5	0.6	0.85	0.8	0.5	1.03	0.86	0.5	0.51	1.13	0.84	1
YDL073W	YDL073W || (1)	-0.03	0	-0.18	-0.36	-0.56	0.29	0.08	0.31	-0.49	-0.24	-0.6	-0.89
YDL074C	YDL074C || BRE1 (1)	0.55	0.45	0.39	0.22	0.52	0.29	0.31	-0.36	-0.19	-0.43	-0.77	-0.02
YDL075W	YDL075W || RPL31A (1)	0.1	0.09	0	0.04	0.12	0.27	0.22	0.1	0.07	0.13	-0.03	0.59
YDL076C	YDL076C || RXT3 (1)	0.01	0.01	-0.2	-0.08	-0.3	0.13	-0.06	0.58	-0.04	0.04	0.08	-0.26
YDL077C	YDL077C || VAM6 (1)	0.29	0.34	0.14	0.32	0.28	0.16	0.32	0.05	-0.29	0.03	-0.13	-0.23
YDL078C	YDL078C || MDH3 (1)	-0.17	-0.03	-0.39	-0.29	-0.15	-0.21	-0.35	-0.25	0.14	-0.18	0.22	-0.2
YDL079C	YDL079C || MRK1 (1)	0.2	-0.15	-0.78	-0.15	0.1	-0.25	0.03	0.49	0.17	0.52	1.39	-0.26
YDL080C	YDL080C || THI3 (1)	-0.03	0	0.06	-0.28	-0.11	-0.1	-0.16	-0.14	-0.42	-0.4	-0.52	-0.37
YDL081C	YDL081C || RPP1A (1)	-0.33	-0.22	-0.32	-0.2	-0.18	-0.17	-0.2	-0.16	-0.29	-0.19	-0.51	-0.2
YDL082W	YDL082W || RPL13A (1)	0.65	0.61	0.47	0.51	0.35	0.69	0.55	-0.12	0.4	-0.03	-0.26	0.56
YDL083C	YDL083C || RPS16B (1)	0.06	-0.21	-0.26	-0.16	0.01	0	0.1	-0.16	0.3	-0.02	0.07	0.23
YDL084W	YDL084W || SUB2 (1)	0.14	0	-0.11	-0.03	-0.17	0.06	0.02	0.02	0.22	-0.11	-0.05	-0.09
YDL085C-A	YDL085C-A || (1)	0.1	0.06	0.01	-0.09	-0.24	0.2	-0.02	-0.2	-0.27	-0.21	-0.52	-0.23
YDL085W	YDL085W || NDE2 (1)									0.81	1.1	2.84	-0.3
YDL086W	YDL086W || (1)	-0.62	-0.4	-0.6	-0.89	-0.57	-0.93	-0.78	-0.57	-0.09	-0.71	0.07	-0.41
YDL087C	YDL087C || LUC7 (1)	0.02	0.07	0.27	-0.24	-0.1	-0.38	-0.2	-0.32	0.05	-0.18	-0.05	-0.59
YDL088C	YDL088C || ASM4 (1)	0.11	0.01	-0.03	0.08	0.07	0.03	0.11	0.01	0.1	-0.03	-0.21	0.11
YDL089W	YDL089W || (1)	0.25	0.29	0.33	0.26	0.23	0.39	0.26	0.06	0.05	0.41	0.23	-0.11
YDL090C	YDL090C || RAM1 (1)	-0.26	-0.34	0.03	-0.34	-0.26	-0.19	-0.5	-0.86	-0.19	-0.26	-0.29	-0.35
YDL091C	YDL091C || UBX3 (1)	0	0.05	-0.03	-0.12	-0.14	0.01	-0.23	0.2	0.35	0.4	0.4	-0.03
YDL092W	YDL092W || SRP14 (1)	-0.05	0.01	0.22	0.15	0.06	0.1	0.09	-0.33	-0.21	-0.11	-0.31	0.05
YDL093W	YDL093W || PMT5 (1)	0.01	0.09	0.09	0.05	0.22	0.18	0.11	-0.39	-0.4	-0.09	-0.38	0.01
YDL094C	YDL094C || (1)	-1.14	-1.11	-1	-0.83	-0.98	-1.69	-0.95		0.06	-0.29	-0.31	-0.12
YDL095W	YDL095W || PMT1 (1)	-0.15	-0.24	-0.27	-0.01	-0.14	-0.45	-0.1	-0.34	-0.22	-0.38	-0.43	0.17
YDL096C	YDL096C || (1)	0.19	0.21	0.27	0.13	0.27	0.03	-0.25	-0.39	0.19	-0.04	-0.39	-0.02
YDL097C	YDL097C || RPN6 (1)	0.01	0.07	-0.02	0.02	0.01	0.04	0	-0.2	0.27	0.39	0.45	0.01
YDL098C	YDL098C || SNU23 (1)	0.03	0.16	0.03	0.2	0.05	0.24	0.22	0.07	0.04	-0.13	-0.17	-0.04
YDL099W	YDL099W || (1)	0.03	-0.04	0.02	-0.04	-0.11	0.07	-0.11	0.49	0.12	0.37	0.07	-0.04
YDL100C	YDL100C || ARR4 (1)	-0.25	-0.08	-0.36	-0.17	-0.17	-0.03	-0.22	0.09	-0.24	-0.11	-0.16	0.08
YDL101C	YDL101C || DUN1 (1)	0.26	0.17	0.54	0.23	0.1	0.07	0.02	0.13	-0.03	-0.05	0.02	0.07
YDL102W	YDL102W || CDC2 (1)	0.56	0.18	0.16	0.29	0.38	0.23	0.24	-0.06	0.11	0.03	-0.13	-0.48
YDL103C	YDL103C || QRI1 (1)	0.18	0.16	0.26	0.12	0.25	0.12	0.05	0.04	0.04	0.36	0.2	-0.02
YDL104C	YDL104C || QRI7 (1)	0.01	-0.02	0.22	-0.02	0.19	-0.1	0.22	-0.55	-0.14	-0.18	0.02	-0.3
YDL105W	YDL105W || NSE4 (1)			0.06	-0.04					0.12	-0.68	-0.52	1.47
YDL106C	YDL106C || PHO2 (1)	0.15	-0.11	0.04	-0.13	-0.12	-0.38	-0.38	-0.17	0.02	0.03	-0.05	0.27
YDL107W	YDL107W || MSS2 (1)	-0.04	0.01	0.09	-0.22	0.25	-0.19	0.08	-0.2	0.15	-0.07	0.42	0.13
YDL108W	YDL108W || KIN28 (1)	-0.01	0.15	0.19	0.04	-0.06	0.19	0.08	-0.02	-0.37	-0.28	-0.5	-0.09
YDL109C	YDL109C || (1)	0.29	-0.23	-0.04	0.08	-0.1	-0.24	0.02	-0.11	0.15	-0.39	-0.56	-0.6
YDL110C	YDL110C || (1)	0.09	0.36	-0.14	-0.25	0.21	-0.11	0.19	0.21	0.18	0.17	1.5	0.42
YDL111C	YDL111C || RRP42 (1)	-0.24	-0.15	0.01	-0.05	-0.09	0.03	-0.24	-0.41	-0.2	-0.09	-0.48	0.01
YDL112W	YDL112W || TRM3 (1)	-0.08	-0.17	-0.29	0.01	-0.14	-0.17	-0.1	-0.35	-0.39	-0.42	-0.55	-0.56
YDL113C	YDL113C || ATG20 (1)									0.32	0.48	0.37	-0.43
YDL114W	YDL114W || (1)		0.16	0.61						0	1.31	-0.11	0.39
YDL114W-A	YDL114W-A || (1)	-0.67		0.09	-0.23	-0.02			-0.82	-0.17	-0.2	-0.29	0.63
YDL115C	YDL115C || IWR1 (1)	-0.29	0.13	0.24	-0.21	-0.36	0.03	-0.11	0.38	0.29	0.44	0.01	-0.39
YDL116W	YDL116W || NUP84 (1)	0.33	0.14	0.32	0.3	0.23	0.24	0.35	-0.19	-0.19	-0.15	-0.37	0.08
YDL117W	YDL117W || CYK3 (1)	0.24	0.32	0.2	0.11	0.22	0.19	0.1	0.33	0	-0.15	-0.13	-0.08
YDL118W	YDL118W || (1)	1.37	1.52	0.68	1.5	1.73	1.09	1.15	-0.35	0.17	0.35	0.25	-0.05
YDL119C	YDL119C || (1)	-0.3	-0.19	-0.1	0.07	-0.13	0.15	-0.03	0.84	-0.46	0.17	0.52	0.16
YDL120W	YDL120W || YFH1 (1)	-0.17	0.15	0.07	0.06	-0.14	0.07	0	0.04	0.08	-0.24	-0.21	-0.55
YDL121C	YDL121C || (1)	-0.42	-0.23	-0.02	-0.01	-0.21	0.14	-0.02	0.18	0.31	0.27	-0.31	0.18
YDL122W	YDL122W || UBP1 (1)	0.58	0.55	0.51	0.62	0.56	0.68	0.59	0.02	0.17	-0.01	-0.31	0.24
YDL123W	YDL123W || SNA4 (1)	-0.14	-0.07	-0.21	-0.04	-0.01	0.15	0.05	0.04	0.57	0.4	0.38	0
YDL124W	YDL124W || (1)	-0.67	-0.59	-1.11	-0.2	-0.82	-0.76	-0.76	0.16	1.5	0.85	0.73	0.09
YDL125C	YDL125C || HNT1 (1)	0.44	0.33	0.33	0.28	0.44	0.47	0.28	0.38	-0.6	-0.37	-0.14	0.51
YDL126C	YDL126C || CDC48 (1)	0.12	0.45	-0.07	0.2	0.4	0.29	0.11	0.04	0.59	0.59	0.49	-0.22
YDL127W	YDL127W || PCL2 (1)	0.42	0.34	0.47	0.12	0.47	0.43	0	-0.36	0.1	-0.34	-0.04	0.22
YDL128W	YDL128W || VCX1 (1)	-0.02	-0.41	0.22	-0.08	-0.12	-0.17	0	-0.26	0.63	0.1	0.02	0.83
YDL129W	YDL129W || (1)				-0.07					0.42	-0.45	-0.65	0.42
YDL130W	YDL130W || RPP1B (1)	0.42	0.49	0.27	0.51	0.61	0.59	0.51	-0.3	-0.27	-0.22	-0.38	0.68
YDL130W-A	YDL130W-A || STF1 (1)	1.13	1.45	0.96	1.15	1.39	0.95	1.35	-0.05	-0.16	1	1.72	1.3
YDL131W	YDL131W || LYS21 (1)	0.57	-0.07	0.44	0.35	0.65	0.4	0.51	0.37	-0.58	0.13	-0.31	-0.02
YDL132W	YDL132W || CDC53 (1)	-0.56	-0.57	-0.76	-0.31	-0.47	-0.37	-0.53	0.19	-0.11	-0.02	-0.29	-0.38
YDL133C-A	YDL133C-A || RPL41B (1)	-1.49	-1.45	-1.55	-1.38	-1.56	-1.24	-1.2	0.1	-0.24	-0.25	-0.19	-0.34
YDL133W	YDL133W || (1)	-0.33	-0.31	-0.51	-0.38	-0.52	-0.39	-0.33	0.26	0.16	0.12	0.02	-0.33
YDL134C	YDL134C || PPH21 (1)	-0.2	-0.09	-0.06	-0.27	-0.12	-0.16	-0.13	-0.09	0.21	0.22	0.03	-0.03
YDL135C	YDL135C || RDI1 (1)	0.18	0.32	0.07	0.2	0.18	0.17	0.13	-0.24	-0.37	0.24	0.32	0.31
YDL136W	YDL136W || RPL35B (1)	0	0.04	0	0.27	0.02	0.13	0.08	-0.07	0.05	0.12	-0.12	0.35
YDL137W	YDL137W || ARF2 (1)	0.22	0.33	0.46	0.29	0.3	0.14	0.37	0.1	-0.14	0.51	0.88	0.89
YDL138W	YDL138W || RGT2 (1)	-0.04		-0.18	-0.63	0.26	-0.31	-0.44	-0.35	-0.33	-0.37	-0.02	-0.04
YDL139C	YDL139C || SCM3 (1)	0.01	-0.01	-0.08	0.09	-0.01	0.06	0.02	0.02	-0.05	0.01	0.63	0.05
YDL140C	YDL140C || RPO21 (1)	-0.06	-0.08	-0.33	-0.22	0.09	-0.35	-0.27	-0.54	0.03	0.01	0.01	0.14
YDL141W	YDL141W || BPL1 (1)	-0.07	-0.22	-0.28	-0.07	-0.22	-0.14	-0.29	-0.61	-0.23	-0.21	-0.29	-0.29
YDL142C	YDL142C || CRD1 (1)	-0.23	-0.33	-0.15	-0.44	-0.61	-0.4	-0.36	-0.22	0.01	0.09	0.5	0.06
YDL143W	YDL143W || CCT4 (1)	0.34	0.35	0.31	0.12	0.07	0.23	0.07	-0.11	0.44	0.27	0.01	-0.28
YDL144C	YDL144C || (1)	-0.33	-0.26	-0.85	0.6	-0.35	-0.85	-0.51	-0.37	0.01	0.01	0.02	-0.36
YDL145C	YDL145C || COP1 (1)	-0.03	-0.18	-0.21	-0.01	0.06	-0.14	-0.15	-0.31	-0.14	-0.01	-0.26	0.01
YDL146W	YDL146W || (1)	0.02	-0.04	-0.05	0.03		-0.6	-0.09	0.43	-0.1	-0.15	-0.12	0.15
YDL147W	YDL147W || RPN5 (1)	-0.04	-0.03	0.28	0.36	0.13	0.23	0.15	0.29	0.1	0.2	0.05	-0.08
YDL148C	YDL148C || NOP14 (1)	0.12	0.01	0.01	0.38	-0.24	0.31	0.08	-0.08	-0.1	-0.13	-0.86	-0.08
YDL149W	YDL149W || ATG9 (1)	-0.08	0.07	-0.1	0.52	-0.17	-0.29	-0.28	-0.6	0.16	0.16	0.26	-0.05
YDL150W	YDL150W || RPC53 (1)	-0.46	-0.46	-0.55	-0.51		-0.58	-0.44	0.22	-0.34	-0.34	-0.61	-0.59
YDL151C	YDL151C || BUD30 (1)	0.63	0.91	0.23	0.5	0.79	0.27	0.36	-0.61	-0.19	-0.17	-0.5	-0.6
YDL153C	YDL153C || SAS10 (1)	-0.21	-0.53	-0.11	-0.08	-0.41	-0.07	-0.09	0.25	-0.06	0.02	-0.6	-0.65
YDL154W	YDL154W || MSH5 (1)	-0.44	-0.64	-0.53	-0.5	-0.23	-0.44	-0.53	-0.28	-0.27	-0.09	0.02	-0.41
YDL155W	YDL155W || CLB3 (1)	0.08	-0.08	-0.02	-0.17	-0.13	-0.16	-0.19	-0.3	-0.03	-0.37	-0.43	-0.21
YDL156W	YDL156W || (1)	0.9	0.9	0.83	0.87	0.98	0.51	0.69	-1.33	-0.2	-0.11	0.08	-0.16
YDL157C	YDL157C || (1)	-0.03	0.17	0.02	0.2	0.05	0.38	0.42	0.16	0.08	-0.14	0.11	0.02
YDL158C	YDL158C || (1)	-0.05	-0.12	-0.1	-0.01	-0.19	0.33	0.26	-0.21	-0.12	-0.62	-0.1	-0.21
YDL159W	YDL159W || STE7 (1)	0	0.1	0.32	0.17	0.18	0.4	0.41	-0.09	0.07	0.11	-0.16	-0.36
YDL159W-A	YDL159W-A || (1)									0.39		-0.27	-0.08
YDL160C	YDL160C || DHH1 (1)	0.87	0.78	0.38	0.59	0.74	0.63	0.61	0.21	0.37	-0.46	-0.7	1.26
YDL161W	YDL161W || ENT1 (1)	-0.08	-0.1	0.49	-0.15	-0.2	-0.07	-0.24	-0.02	0.21	0.35	0.05	-0.26
YDL162C	YDL162C || (1)	-0.33	-0.29	-0.25	-0.04		-0.27
YDL164C	YDL164C || CDC9 (1)	0.11	0.1	0.13	0.11	0.18	0.01	-0.18	-0.19	0	-0.04	-0.22	-0.15
YDL165W	YDL165W || CDC36 (1)	-0.06	0.04	0.22	0.32	-0.02	0.27	0.06	-0.35	-0.09	-0.07	-0.07	0.45
YDL166C	YDL166C || FAP7 (1)	0.36	0.53	0.42	0.43	0.4	0.5	0.45	0.35	-0.23	0.05	-0.23	0.06
YDL167C	YDL167C || NRP1 (1)	-0.43	-0.65	-0.65	-0.43	-0.68	-0.49	-0.56	-0.23	-0.39	-0.59	-0.85	-0.7
YDL168W	YDL168W || SFA1 (1)	0.06	0.14	-0.24	0.34	0.15	0.12	0.05	0.3	0.39	0.02	-0.27	0.01
YDL169C	YDL169C || UGX2 (1)	0.11	0.56	-0.25	-0.14	0.04	-0.28	-0.2	-0.01	0.83	0.98	1.67	-0.52
YDL170W	YDL170W || UGA3 (1)	-0.42	-0.02	-0.2	-0.12	-0.29	-0.39	0.17	0.62	-0.07	-0.09	-0.67	0.14
YDL171C	YDL171C || GLT1 (1)	0.37	0.18	0.52	0.22	0.66	0.42	0.55	0.08	-0.42	-0.46	-0.08	-0.71
YDL172C	YDL172C || (1)	-0.43	-0.48	-0.46	-0.45	-0.57	-0.65	-0.9		0.28	0.07	0.02	-0.08
YDL173W	YDL173W || (1)	0.22	0.49	0.29	0.41	0.36	0.04	0.13	-0.43	0.21	0.34	0.16	-0.05
YDL174C	YDL174C || DLD1 (1)	0.23	0.37	0.06	0.07	0.36	-0.02	-0.01	-0.35	0.34	-0.26	0.32	-0.03
YDL175C	YDL175C || AIR2 (1)	0.03	-0.02	0.15	0.05	0.01	0.2	0.04	-0.48	0	0.04	-0.12	-0.1
YDL176W	YDL176W || (1)	0.11	-0.21	0.02	0.13	0.29	0.24	-0.08	0.02	-0.01	-0.19	-0.23	-0.25
YDL177C	YDL177C || (1)	0.16	0.24	0.1	0.26	0.15	0.23	0.09	0.02	-0.43	-0.26	-0.06	0.1
YDL178W	YDL178W || DLD2 (1)	0.05	0	0.29	0.02	-0.12	0.04	0.28	-0.31	0	-0.09	0.1	-0.09
YDL179W	YDL179W || PCL9 (1)	0.04	0.01	0.1	0.23	0.22	0	0.1	0.08	-0.34	-0.36	-0.28	0.06
YDL180W	YDL180W || (1)	-0.1	-0.05	0.15	0.07	0.02	0.19	0	0.13	-0.01	-0.04	-0.13	-0.26
YDL181W	YDL181W || INH1 (1)	0.36	0.46	-0.46	0.12	0.35	0.03	0.43	-0.7	0.59	-0.39	1.2	1.77
YDL182W	YDL182W || LYS20 (1)	0.55	-0.16	-0.07	0.93	0.53	0.17	0.31	-0.05	1.02	0.03	0.05	0.69
YDL183C	YDL183C || (1)	0.02	0.05	-0.87	-0.24	-0.17	-0.66	-0.99	-0.65	0.75	0.12	0.86	-0.29
YDL184C	YDL184C || RPL41A (1)	-1.32	-1.66	-1.51	-1.26	-1.25	-1.19	-1.17	-0.26	-0.11	0.07	-0.04	0.21
YDL185C-A	YDL185C-A || (1)	-0.75	-0.59	-0.69	-0.82		-0.22	-0.8		-1.13	-0.11	-0.24	0.92
YDL185W	YDL185W || TFP1 (1)	0.26	0.32	-0.03	0.29	0.26	-0.01	-0.2	0.26	-0.05	0.29	0.35	-0.19
YDL186W	YDL186W || (1)	-0.32	-0.27	0.09	-0.11		0.17	0.03	0.16	-0.3	-0.09	-0.47	-0.18
YDL187C	YDL187C || (1)	-0.36	-0.27	-0.06	-0.29	-0.26	0.25	-0.08	0	-0.65	-0.82	-0.62	-0.61
YDL188C	YDL188C || PPH22 (1)	-0.46	-0.51	-0.48	-0.51	-0.54	-0.57	-0.61	-0.03	-0.13	-0.24	-0.07	1.1
YDL189W	YDL189W || RBS1 (1)	0.04	-0.17	-0.13	-0.09	-0.1	-0.16	-0.45	-0.57	-0.36	-0.15	-0.77	-0.64
YDL190C	YDL190C || UFD2 (1)	0.02	-0.03	-0.05	0.09	-0.02	0.06	-0.02	0.08	-0.02	0.18	-0.18	-0.44
YDL191W	YDL191W || RPL35A (1)	0.29	0.24	0.32	0.53	0.41	0.52	0.48	-0.29	-0.02	0.12	0.04	0.48
YDL192W	YDL192W || ARF1 (1)	0.15	0.17	0.23	0.39	0.11	0.29	0.33	0.28	-0.33	0.26	0.14	0.35
YDL193W	YDL193W || (1)	-0.13	-0.32	-0.2	0.11	-0.11	-0.22	-0.27	-0.04	-0.18	0.04	-0.39	-0.28
YDL194W	YDL194W || SNF3 (1)	0.01	0.1	0.37	0.09	0.13	0.06	0.08	-0.07	0.41	0.6	0.74	0.17
YDL195W	YDL195W || SEC31 (1)	-0.51	-0.58	-0.78	-0.37	-0.33	-0.73	-0.7	-0.82	0.16	-0.2	-0.21	0.4
YDL196W	YDL196W || (1)									-0.51	-0.48	-0.41	-0.18
YDL197C	YDL197C || ASF2 (1)	-0.09	-0.28	-0.4	-0.46	-0.39	-0.51	-0.55	-0.77	0.25	-0.39	-0.28	-0.36
YDL198C	YDL198C || GGC1 (1)	-0.28	-0.36	0.34	-0.83	-0.35	-0.71	0.09	0.28	-0.26	0.34	-0.84	-0.38
YDL199C	YDL199C || (1)									0.94	0.5	1.03	0.09
YDL200C	YDL200C || MGT1 (1)	0.44	0.81	0.64	0.58	0.63	0.88	0.91	0.37	-0.46	0.38	0.41	0.02
YDL201W	YDL201W || TRM8 (1)	0.17	0.03	-0.26	0.06	-0.01	-0.07	-0.1	-0.24	-0.31	-0.36	-0.55	-0.09
YDL202W	YDL202W || MRPL11 (1)	-0.05	-0.19	-0.19	-0.26	-0.04	-0.39	0.17	-1.03	0.49	-0.18	0.36	-0.05
YDL203C	YDL203C || (1)	-0.4	-0.08	-0.42	-0.42	-0.29	-0.56	-0.48	-0.66	-0.23	-0.22	-0.38	-0.94
YDL204W	YDL204W || RTN2 (1)	0.32	1.18	-0.58	-0.26	0.12	0.02	-0.25	0.73	1.13	0.15	2.03	1.39
YDL205C	YDL205C || HEM3 (1)	1.41	1.32	1.12	0.94	1.47	1.06	1.2	0.2	-0.21	-0.7	-0.54	1.2
YDL206W	YDL206W || (1)	0.56	0.5	0.31	0.39			0.22	0.89	0.57	-0.04	0.66	0.32
YDL207W	YDL207W || GLE1 (1)	-0.13	-0.14	0.18	-0.1	-0.18	-0.11	-0.35	-0.35	0.05	-0.27	-0.42	-0.39
YDL208W	YDL208W || NHP2 (1)	0.19	0.36	0.25	0.33	0.17	0.3	0.29	-0.24	-0.07	-0.08	-0.35	0.51
YDL209C	YDL209C || CWC2 (1)	0.22	0.23	0.21	0.4	0.32	0.23	0.21	-0.37	0.21	0.23	-0.36	-0.26
YDL210W	YDL210W || UGA4 (1)	-0.1	0.53	0.83	0.3	0.97	0.09	0.45	0.68	-0.12	0.26	-0.24	0.06
YDL211C	YDL211C || (1)	-0.06	-0.19	-0.12	-0.08	0.02	-0.18	-0.12	-0.18	-0.13	-0.24	-0.39	0.2
YDL212W	YDL212W || SHR3 (1)	0.09	0.2	0.15	0.26	0.09	0.3	0.45	0.13	0.06	-0.05	-0.14	0.39
YDL213C	YDL213C || NOP6 (1)	-0.22	-0.05	-0.19	0.16	-0.37	-0.16	-0.11	0.3	-0.29	-0.08	-0.46	-0.21
YDL214C	YDL214C || PRR2 (1)				-0.62					0.16	-0.04	0.49	0.06
YDL215C	YDL215C || GDH2 (1)	0.12	-0.21	0.44	0.72	0.4	0.18	0.67	0.3	0.18	0.31	0.91	-0.28
YDL216C	YDL216C || RRI1 (1)	-0.25	-0.08	-0.36	-0.34	-0.27	-0.33	-0.26	-0.34	0.13	0.22	0.32	0.07
YDL217C	YDL217C || TIM22 (1)	0.27	0.19	0.17	0.14	0.23	-0.13	0.16	-0.36	-0.14	-0.32	-0.47	-0.63
YDL218W	YDL218W || (1)	-0.49	0.16	-0.78	-0.57	-0.8	-1.49	-0.34	0.07	0.33	-0.5	0.98	0.04
YDL219W	YDL219W || DTD1 (1)	0.31	0.4	0.2	0.24	0.23	0.54	0.23	-0.01	-0.46	-0.53	-0.48	0.43
YDL220C	YDL220C || CDC13 (1)	0.37	0.66	0.65	0.27	0.59	0.45	0.44	-0.55	0.34	0.1	-0.23	-0.07
YDL221W	YDL221W || (1)									-0.06
YDL222C	YDL222C || FMP45 (1)	0.39	0.79	0.39	0.78		0.39			0.46	0.36	1.34	0.95
YDL223C	YDL223C || HBT1 (1)	-0.02	0.34	-0.13	0		0.04	0.1	0.38	0.42	0.6	0.97	0.95
YDL224C	YDL224C || WHI4 (1)	-0.14	-0.12	-0.33	-0.21	0.02	-0.29	-0.3	-0.75	-0.11	-0.21	-0.23	0.03
YDL225W	YDL225W || SHS1 (1)	-0.12	-0.38	-0.01	-0.46	-0.52	-0.59	-0.01	-0.88	-0.2	0.11	-0.48	-0.12
YDL226C	YDL226C || GCS1 (1)	-0.07	-0.19	-0.16	-0.37	-0.06	-0.31	-0.42	-0.5	-0.05	-0.28	-0.25	-0.34
YDL227C	YDL227C || HO (1)	0.81	0.21	0.54	0.15	0.8	-0.12	-1.03	-1.5	-0.29	-0.7	0.03	-1.06
YDL228C	YDL228C || (1)	-0.47	-0.88	-0.72	-0.28	-0.45	-0.59	-0.45		-0.54	-0.1	-0.83	-0.33
YDL229W	YDL229W || SSB1 (1)	-0.06	-0.21	-0.35	-0.26	-0.24	-0.13	-0.07	-0.07	0.21	-0.38	-0.43	-0.01
YDL230W	YDL230W || PTP1 (1)	-0.35	-0.17	-0.33	-0.35	-0.53	-0.55	-0.53	0.03	-0.05	0.01	0.35	-0.28
YDL231C	YDL231C || BRE4 (1)	-0.09	-0.29	0.04	-0.51	-0.27	-0.45	-0.37	-0.01	-0.27	-0.34	-0.39	-0.15
YDL232W	YDL232W || OST4 (1)	0.09	0.28	0.25	0.23	0.37	0.21	0.27	-0.17	0	0.12	0.01	0.96
YDL233W	YDL233W || (1)	0.44	0.53	0.53	0.89	0.66	0.51	0.58	0.31	-0.01	0.69	0.73	0.22
YDL234C	YDL234C || GYP7 (1)				0.4	0.72	0.44	0.48	-0.31	0.11	1.34	1.01	-0.01
YDL235C	YDL235C || YPD1 (1)	0.14	0.57	0.43	0.32	0.23	0.32	0.35	0.61	-0.44	0.02	0.19	0.5
YDL236W	YDL236W || PHO13 (1)	-0.01	-0.33	0.1	0.16	-0.21	-0.18	-0.24	-0.38	-0.33	-0.13	-0.14	0.05
YDL237W	YDL237W || (1)	0.46	0.33	0.52	0.22	0.39	0.41	0.39	-0.08	-0.23	-0.03	0.07	0.08
YDL238C	YDL238C || GUD1 (1)	-0.18	-0.09	0	-0.21	0.13	-0.75	-0.16	0.02	-0.06	0.19	0.46	-1
YDL239C	YDL239C || ADY3 (1)		0.02	0.38	0.11					-0.54	-0.27	0.07	1.02
YDL240C-A	YDL240C-A || (1)									0.12	-0.19	-0.37
YDL240W	YDL240W || LRG1 (1)	-0.17	-0.31	-0.01	-0.29	-0.22	-0.37	-0.37	-0.74	0.09	-0.3	-0.3	0.4
YDL241W	YDL241W || (1)	-0.22	-0.37	-0.28	1.2	-0.21	0.9	0.83	1.29	-1.72	0.47	-1.06	0.21
YDL242W	YDL242W || (1)									0.87
YDL243C	YDL243C || AAD4 (1)	-0.07	-0.35		-0.36	-0.12	-0.18	-0.13	0.32	-0.1	0.13	0.1	-0.52
YDL244W	YDL244W || THI13 (1)						1.83			0.25	1.44	1.72	1.11
YDL245C	YDL245C || HXT15 (1)									-0.37	0.47	3.01
YDL246C	YDL246C || SOR2 (1)		0.54	-0.8			0.13			0.24	0.6	1.06	-0.36
YDL247W	YDL247W || MPH2 (1)	0.18	0.54	-0.12	0.12	0.08	0.78	-0.01	0.12	0.15	0.3	-0.24	0.12
YDL247W-A	YDL247W-A || (1)	-0.3	-0.49	-0.89	-0.44		-0.15	-0.98	0.41	0.22	0.51	0.1	0.32
YDL248W	YDL248W || COS7 (1)									0.64	0.57	0.05	-0.16
YDR001C	YDR001C || NTH1 (1)	0.19	0.21	0.01	0.3	0.72	0.08	0.02	0.67	0.56	0.35	1.04	-0.18
YDR002W	YDR002W || YRB1 (1)	-0.25	-0.26	-0.26	-0.18	-0.36	-0.12	-0.18	0.73	0.25	-0.11	0.08	-0.07
YDR003W	YDR003W || RCR2 (1)	0.04	-0.05	0.34	0.03	0.07	0.01	0.07	-0.31	0.69	0.58	0.88	0.64
YDR004W	YDR004W || RAD57 (1)	-0.08	0.05	-0.02	-0.09	-0.13	-0.27	0.02	-0.16	0.06	-0.58	-0.43	0.23
YDR005C	YDR005C || MAF1 (1)	-0.03	-0.08	0.15	-0.15	-0.29	-0.24	-0.2	0.1	-0.11	-0.29	-0.24	-0.22
YDR006C	YDR006C || SOK1 (1)	-0.13	0.17	-0.11	-0.04	0.02	0.05	-0.06	-0.02	0.04	0	0.07	0.27
YDR007W	YDR007W || TRP1 (1)	0.3	0.37	0.95	0.19		0.5	0.55	-0.12	0.01	0.14	0.58	-0.04
YDR008C	YDR008C || (1)	-1.02	-1.1	-1.01	-1.11	-0.73	-0.41	-1.12		0.26	-0.16	-0.37	-0.23
YDR009W	YDR009W || GAL3 (1)	-0.85	-0.28	-0.37	0.1		-0.37	-0.15	0.54	-0.27	0.36	0.53	-0.45
YDR010C	YDR010C || (1)									0.32	0.22	0.9	0.98
YDR011W	YDR011W || SNQ2 (1)	-0.1	0.06	0.04	0.33	0.51	0.38	0.26	-0.02	0.16	0.63	0.07	-0.74
YDR012W	YDR012W || RPL4B (1)	-0.43	-0.57	-0.77	-0.54	-0.57	-0.68	-0.54	-0.08	0.23	-0.38	-0.24	-0.58
YDR013W	YDR013W || PSF1 (1)	0.4	0.56	0.75	0.35		0.69	0.02	-0.85	-0.19	-0.2	-0.31	0.15
YDR014W	YDR014W || RAD61 (1)	0.9	0.66	0.77	0.87	0.84	0.76	0.7	0.64	-0.04	-0.07	-0.24	0.23
YDR015C	YDR015C || (1)	0.45	0.45	0.07	0.69					0.3	-0.01	-0.08	-0.21
YDR016C	YDR016C || DAD1 (1)	-0.02	-0.1	0.03	-0.07	0.06	0.26	-0.43	-0.8	0.05	-0.02	-0.24	0.23
YDR017C	YDR017C || KCS1 (1)	-0.24	0.02	-0.5	-0.08	0.28	-0.08	0.23	-0.11	-0.42	-0.25	-0.32	-0.1
YDR018C	YDR018C || (1)	0.05		0.06	0.59					0.83	1.36	2.74	0.93
YDR019C	YDR019C || GCV1 (1)	-0.14	-0.01	0.96	-0.06	0.28	-0.63	1.23	0.2	-0.44	1.06	0.59	1.23
YDR020C	YDR020C || (1)	0.18	-0.27	0.06	0	0.16	0.09	0.29	-0.15	-0.12	-0.43	-0.61	-0.04
YDR021W	YDR021W || FAL1 (1)	0.16	-0.21	0.11	0.22	-0.23	0.5	0.29	0.15	-0.01	-0.23	-0.79	-0.33
YDR022C	YDR022C || CIS1 (1)	-0.12	0.06	-0.06	-0.21	-0.08	-0.12	-0.16	-0.03	-0.25	-0.09	-0.27	0.12
YDR023W	YDR023W || SES1 (1)	0.29	0.1	0.14	0.21	-0.02	0.28	0.12	0.1	-0.07	-0.14	-0.45	-0.4
YDR024W	YDR024W || FYV1 (1)									0.87	-0.28
YDR025W	YDR025W || RPS11A (1)	0.58	0.65	0.42	0.54	0.63	0.58	0.53	-0.57	-0.13	-0.06	-0.37	-0.07
YDR026C	YDR026C || (1)	0.09	0.04	0.11	0.03	-0.01	0.07	0.07	0.1	-0.12	-0.27	-0.6	-0.45
YDR027C	YDR027C || VPS54 (1)	0.26	0.23	0.25	0.15	0.26	0.28	0.04	0.02	-0.17	-0.25	-0.51	-0.23
YDR028C	YDR028C || REG1 (1)	-0.14	-0.21	-0.1	0.07	-0.08	-0.28	0.04	0.22	-0.16	0.08	-0.03	-0.22
YDR029W	YDR029W || (1)	0.24	0.6	0.49	0.6		0.21			0.06	0.34	0.07	-0.2
YDR030C	YDR030C || RAD28 (1)	0.07	0.24	0.4	0.23	-0.04	0.35	0.2	-0.05	0.29	0.07	0.45	0.03
YDR031W	YDR031W || (1)	0.04	0.44	-0.03	-0.16	0.07	0.92	-0.01	-0.12	0.51	0.12	1.15	0.2
YDR032C	YDR032C || PST2 (1)	0.1	0.17	-0.04	-0.06	0.12	0.09	0.1	0.16	0.27	0.62	1.08	0.26
YDR033W	YDR033W || MRH1 (1)	-0.23	-0.13	-0.77	-0.4	-0.15	-0.18	-0.77	-0.42	1.38	-1.48	-0.02	0.77
YDR034C	YDR034C || LYS14 (1)	-0.04	-0.2	0.17	-0.01	-0.01	0.04	-0.24	0.16	0.12	-0.17	-0.3	-0.12
YDR034C-A	YDR034C-A || (1)	-0.33	-0.68	-0.24	-0.13	-0.36	-0.12	0.05		-0.09	0.33	-0.09	-0.67
YDR034W-B	YDR034W-B || (1)	1.39	1.96	1.07	2.06	2.2	2.34	2.19	1.71	0.4	3.31	2.96	0.29
YDR035W	YDR035W || ARO3 (1)	-0.51	-0.67	-0.16	-0.67	-0.63	-0.86	-0.4	0.61	-0.36	-0.04	-0.92	0.7
YDR036C	YDR036C || EHD3 (1)	0.33	0.45	0	0.33	0.51	0.26	0.3	-0.82	-0.09	-0.18	-0.16	-0.01
YDR037W	YDR037W || KRS1 (1)	-0.02	-0.06	-0.07	0.02	0.03	0.15	-0.04	0.56	-0.37	0.25	-0.3	-0.33
YDR038C	YDR038C || ENA5 (1)	0.05	-0.14	-0.05	-0.09	-0.03	0.13	0.03	-0.17	0.14	-0.17	-0.16	-0.17
YDR039C	YDR039C || ENA2 (1)	0.15	0.06	-0.31	1	-0.16	0.14	0.11	0.4	0.45	1.88	-0.06	-0.31
YDR040C	YDR040C || ENA1 (1)	-0.3	-0.39	-0.69	0.55	-0.49	-0.4	-0.2	0.26	0.09	1.1	-0.42	-0.49
YDR041W	YDR041W || RSM10 (1)	-0.05	-0.14	-0.24	-0.25	-0.27	-0.38	0.01	-0.19	0.46	0.36	0.5	0.01
YDR042C	YDR042C || (1)	-0.63	-0.43	-0.7	-0.7		-0.1	-0.04	0.62	-0.1	0.84	0.08	0.27
YDR043C	YDR043C || NRG1 (1)	0.14	0.06	0.71	0.87	0.33	0.09	0	0.78	-0.17	0.9	0.95	1.51
YDR044W	YDR044W || HEM13 (1)	-0.16	-0.14	-0.28	-0.16	-0.14	-0.42	-0.4	-0.62	-0.49	-0.19	-0.28	-0.26
YDR045C	YDR045C || RPC11 (1)	0.49	0.58	0.63	0.73	0.68	0.89	0.75	0.16	-0.5	-0.28	-0.49	0.47
YDR046C	YDR046C || BAP3 (1)	-0.27	-0.49	-0.65	-0.2	-0.59	-0.47	-0.7	-0.71	0.11	-0.16	0	-0.41
YDR047W	YDR047W || HEM12 (1)	-0.05	-0.18	-0.35	-0.29	-0.41	0.1	-0.26	-0.06	-0.07	-0.41	-0.45	-0.23
YDR048C	YDR048C || (1)									-0.48	0.28	0.31	0.13
YDR049W	YDR049W || (1)	-0.71	-0.94	-0.7	-0.77	-0.76	-0.74	-0.91	0.06	-0.04	-0.27	-0.51	-0.54
YDR050C	YDR050C || TPI1 (1)	0.03	-0.12	0.17	-0.07	0.11	0.11	0.04	0.35	-0.09	0.28	0.05	0.16
YDR051C	YDR051C || (1)	-0.4	-0.42	-0.15	-0.4	-0.5	-0.22	-0.53	0.54	0.3	-0.16	0.18	-0.21
YDR052C	YDR052C || DBF4 (1)	0.09	-0.23	-0.2	-0.08	-0.42	-0.43	-0.41	-0.09	-0.05	-0.41	-0.34	-0.16
YDR053W	YDR053W || (1)		0.41	-0.16						0	-0.36	-0.34	-0.19
YDR054C	YDR054C || CDC34 (1)	0.29	0.35	0.33	0.33	0.29	0.13	0.34	-0.22	-0.36	-0.07	-0.11	0.49
YDR055W	YDR055W || PST1 (1)	-0.09	0.13	0.19	0.17	0.65	-0.09	-0.21	-0.02	0.22	0.45	1.83	1.12
YDR056C	YDR056C || (1)	-0.16	-0.05	0.31	0	-0.11	0.26	-0.27	-0.1	0.15	0.36	0.03	0.17
YDR057W	YDR057W || YOS9 (1)	-0.27	-0.57	-0.14	0.15		0.11	-0.05	0.41	0.1	0.25	0.15	0.26
YDR058C	YDR058C || TGL2 (1)	-0.14	0.01	0.94	0.01	-0.09	0.3	-0.38	0.17	1.2	0.73	0.91	0.49
YDR059C	YDR059C || UBC5 (1)		0.7	0.53	0.84		0.14		0.19	0.36	0.83	1.36	0.31
YDR060W	YDR060W || MAK21 (1)	-0.12	-0.26	-0.13	-0.11	-0.19	-0.2	-0.28	-1.5	-0.3	-0.5	-0.69	-0.48
YDR061W	YDR061W || (1)	-0.15	-0.11	0.03	-0.15	-0.11	-0.33	-0.1	0.2	-0.16	0.05	0.29	-0.18
YDR062W	YDR062W || LCB2 (1)	0.47	0.37	0.45	0.56	0.48	0.48	0.43	0.07	-0.18	-0.13	-0.29	0.44
YDR063W	YDR063W || (1)	0.62	0.68	0.3	0.39	0.72	0.59	0.44	-0.5	-0.3	-0.15	-0.07	0.55
YDR064W	YDR064W || RPS13 (1)	-0.22	-0.3	-0.29	-0.06	-0.09	0.12	0	0.19	0.15	0.03	0.04	0.27
YDR065W	YDR065W || (1)	0.21	-0.09	0.05	0.03			-0.38	0.37	-0.17	-0.27	-0.29	-0.69
YDR066C	YDR066C || (1)	-0.86	-0.65	-0.09	-0.32		-0.64	-0.27		0.27	0.08	0.17	0.04
YDR067C	YDR067C || (1)	0.87	0.35	0.69	0.6		0.76	1.13	0.44	0.12	0.19	0.34	0.52
YDR068W	YDR068W || DOS2 (1)	-0.1	-0.09	0.15	0.03	-0.08	0.17	0	0.49	-0.29	0.3	0.24	-0.13
YDR069C	YDR069C || DOA4 (1)	-0.23	-0.23	-0.9	-0.1		-0.3	-0.15	0.07	-0.08	-0.26	-0.04	-0.26
YDR070C	YDR070C || (1)	0.57	1.76	0.2	0.12	0.87	-0.2	0.63	-0.37	0.3	0.49	1.82	0.56
YDR071C	YDR071C || PAA1 (1)	-0.06	0.1	0.09	0	-0.04	0.08	-0.13	0.15	0.17	0.2	0.12	0.35
YDR072C	YDR072C || IPT1 (1)	-0.56	-1.12	-0.82	-0.49	-0.75	-0.49	-0.64	0.27	0.12	0.02	0.12	-0.07
YDR073W	YDR073W || SNF11 (1)	0.06	-0.05	0.47	0.17	0.18	0.13	0.14	0.19	-0.1	-0.39	0.17	0.68
YDR074W	YDR074W || TPS2 (1)	0.02	0.2	-0.05	-0.05	0.24	-0.17	-0.15	-0.13	1.3	0.4	0.86	0.3
YDR075W	YDR075W || PPH3 (1)	0.06	0.1	0.36	0.35	-0.05	0.43	0.19	0.3	0.15	-0.14	-0.34	0.26
YDR076W	YDR076W || RAD55 (1)	0.53	1.02	0.72	0.71		0.79	0.54	-0.15	-0.22	0.1	-0.08	-0.18
YDR077W	YDR077W || SED1 (1)	0.71	0.66	0.05	1.1	1.15	0.55	0.77	0.48	1.29	1.4	2.73	1.1
YDR078C	YDR078C || SHU2 (1)	0.12	0.19	0.2	0.22	0.06	0.27	0.18	-0.52	-0.01	0.08	-0.7	0.23
YDR079C-A	YDR079C-A || TFB5 (1)	-0.56	-0.36	-0.04	-0.35	-0.6	-0.12	-0.2	0.01	0.19	0.08	0.02	0.21
YDR079W	YDR079W || PET100 (1)	0.26	0.57	0.25	0	0.5	0.47	0.77	-0.89	-0.16	-0.17	0.4	0.36
YDR080W	YDR080W || VPS41 (1)	-0.22	0.27	-0.29	-0.32		0.33		0.03	0.01	0.07	-0.1	-0.22
YDR081C	YDR081C || PDC2 (1)	-0.31	-0.4	-0.29	-0.51	-0.36	-0.44	-0.33	-0.54	-0.13	-0.24	-0.47	-0.11
YDR082W	YDR082W || STN1 (1)	0.22	0.3	0.44	0.36	0.16	0.26	0.23	0.13	0.17	-0.21	-0.29	-0.1
YDR083W	YDR083W || RRP8 (1)	0.21	0.17	0.32	0.35	0.18	0.41	0.26	-0.29	-0.07	-0.39	-1.14	-0.3
YDR084C	YDR084C || (1)	0.34	0.52	0.75	0.49	0.66	0.59	0.69	0.05	0.02	0.29	-0.02	0.52
YDR085C	YDR085C || AFR1 (1)	0.17	-0.14	-0.21	0.41	0.4	0.11	0.01	1.2	-0.71	0.16	1.65	0.21
YDR086C	YDR086C || SSS1 (1)	0.48	0.58	0.35	0.48	0.52	0.56	0.55	0.55	-0.16	-0.03	0.31	0.37
YDR087C	YDR087C || RRP1 (1)	-0.32	-0.48	-0.33	-0.21	-0.58	-0.15	-0.2	-0.01	-0.34	-0.53	-0.89	-0.38
YDR088C	YDR088C || SLU7 (1)	-0.15	-0.15	-0.11	-0.04	-0.34	-0.26	-0.32	0.06	-0.24	0.02	-0.27	-0.35
YDR089W	YDR089W || (1)	0.22	-0.03	0.02	-0.06	0.09	-0.07	0.25	-0.36	-0.76	-0.47	-0.29	-0.21
YDR090C	YDR090C || (1)	0.58	0.41	0.65	0.37	0.46	0.6	0.57	-0.03	-0.58	-0.13	-0.4	-0.34
YDR091C	YDR091C || RLI1 (1)	-0.13	-0.15	-0.39	-0.25	-0.24	0.02	-0.14	-0.33	-0.08	-0.71	-0.69	-0.02
YDR092W	YDR092W || UBC13 (1)	0.18	0.43	0.41	0.15	0.58	0.4	0.21	-0.47	-0.27	0.15	-0.09	0.36
YDR093W	YDR093W || DNF2 (1)	0.46	0.33	0.27	1.1	0.54	0.46	0.39	0.02	-0.05	-0.2	-0.38	0.02
YDR094W	YDR094W || (1)	-0.54	-0.68	-0.72	-0.7	-0.49	-0.88	-0.69	-0.4	-0.45	-0.15	-0.17	-0.42
YDR095C	YDR095C || (1)				-0.82						-0.09
YDR096W	YDR096W || GIS1 (1)	0.34	-0.06	-0.38	0.24	0.57	0.61	-0.02	-0.44	0.36	0.23	0.41	0.7
YDR097C	YDR097C || MSH6 (1)	-0.05	-0.24	-0.15	-0.09	-0.19	0.11	-0.09	-0.19	-0.3	-0.39	-0.02	-0.45
YDR098C	YDR098C || GRX3 (1)	-0.39	-0.39	-0.32	-0.19	-0.5	-0.23	-0.26	0.54	-0.12	0.17	-0.18	-0.21
YDR099W	YDR099W || BMH2 (1)	-0.22	-0.06	-0.07	-0.22	-0.27	-0.2	-0.26	-0.08	0	-0.11	-0.1	-0.03
YDR100W	YDR100W || (1)	0.6	0.71	0.77	0.38	0.56	0.57	0.65	-0.53	0.35	0.45	0.45	0.56
YDR101C	YDR101C || ARX1 (1)	0.15	0.1	0.04	0.36	0.09	0.29	0.25	-0.09	0.26	-0.39	-0.9	-0.09
YDR103W	YDR103W || STE5 (1)	0.08	-0.04	0.06	0.12	-0.18	0.12	0.09	-0.3	-0.14	-0.24	-0.21	-0.38
YDR104C	YDR104C || SPO71 (1)	-0.6	-0.47	-0.58	-0.25		-0.65	-0.86	-0.18	0.34	0.22	0.21	-0.48
YDR105C	YDR105C || TMS1 (1)	-0.24	-0.58	0.01	-0.01	-0.14	-0.06	-0.37	-0.02	0.21	0.14	-0.16	0.18
YDR106W	YDR106W || ARP10 (1)									0.18	-0.17	0.1	-0.13
YDR107C	YDR107C || (1)	0.51	0.53	0.5	0.9	0.98	0.45	0.32	-0.34	0.49	-0.58	0.29	1.66
YDR108W	YDR108W || GSG1 (1)	0.04	0.07	0.3	0.03	0.05	0.18	0	-0.39	-0.21	-0.05	-0.23	-0.03
YDR109C	YDR109C || (1)	-0.11	-0.09	-0.03		0.04	-0.14	-0.04	-0.05	-0.06	0.4	0.05	0
YDR110W	YDR110W || FOB1 (1)	-0.16	-0.44	-0.18	-0.1	-0.51	-0.19	-0.17	-0.3	-0.26	-0.44	-0.94	-0.38
YDR111C	YDR111C || (1)	0.41	-0.05	-0.69	0.24		0.24	0.04	-0.31	0.05	-0.3	-0.73	0.3
YDR112W	YDR112W || (1)				-0.71					0.29	-0.31	-0.48	0.91
YDR113C	YDR113C || PDS1 (1)	0.44	0.23	-0.07	0.15	0.25	-0.39	-0.05	-0.46	0.07	-0.38	-0.27	0.14
YDR114C	YDR114C || (1)									-0.18	0.17	0.28	-0.04
YDR115W	YDR115W || (1)	0.47	0.58	0.62	0.5	0.59	0.53	0.86	-0.37	0.53	-0.06	0.36	0.68
YDR116C	YDR116C || MRPL1 (1)	-0.24	-0.22	-0.31	-0.7	-0.17	-0.6	-0.07	-0.73	0.35	-0.57	0.26	0.02
YDR117C	YDR117C || (1)	-0.16	-0.35	-0.01	-0.04	-0.07	-0.09	-0.17	-0.07	0.12	-0.01	-0.24	-0.34
YDR118W	YDR118W || APC4 (1)	-0.23	-0.06	0.11	-0.18	-0.34	0.07	-0.13	0.23	-0.32	-0.25	-0.34	0.12
YDR119W	YDR119W || (1)	-0.27	-0.58	0.07	-0.5	-0.24	0.07	-0.55	0.4	0.17	0.22	-0.08	0.36
YDR120C	YDR120C || TRM1 (1)	-0.14	-0.34	-0.5	-0.28	-0.3	-0.42	-0.31	-0.07	-0.17	-0.35	-0.88	-0.52
YDR121W	YDR121W || DPB4 (1)	-0.16	-0.09	0.18	0.08	-0.18	0.26	-0.05	0.19	-0.27	0.1	-0.25	0.23
YDR122W	YDR122W || KIN1 (1)	-0.18	0.1	-0.24	0.13	0.1	-0.06	-0.04	0.16	0.36	0.25	0.11	-0.11
YDR123C	YDR123C || INO2 (1)			-0.14				-0.38		0.05	-0.46	-0.62	-0.67
YDR124W	YDR124W || (1)		-0.17	0.15	-0.17					-0.39	-0.54	0.23	-1.03
YDR125C	YDR125C || ECM18 (1)	-0.41	-0.78	-0.94	-0.72		-0.52	-0.48		0.72	-0.03	0.3	0.69
YDR126W	YDR126W || SWF1 (1)			0.93						-0.03	-0.32	-0.25	-0.29
YDR127W	YDR127W || ARO1 (1)	-0.12	-0.22	0.02	-0.26	0.1	-0.37	-0.07	-0.07	-0.4	0.02	-0.49	-0.46
YDR128W	YDR128W || (1)	-0.2	-0.1	-0.36	-0.21	-0.18	-0.19	-0.19	0.28	-0.04	0.31	-0.16	-0.43
YDR129C	YDR129C || SAC6 (1)	0.29	-0.09	0.14	-0.04	0.06	-0.27	-0.08	0.06	0.34	0.62	0.15	-0.4
YDR130C	YDR130C || FIN1 (1)	-0.31	-0.15	0.25	-0.44		-0.03		0.01	0.17	-0.16	-0.03	-0.16
YDR131C	YDR131C || (1)	0.08	0.25	0.34	0.13	0.29	0.26	-0.01	-0.07	-0.22	0.03	-0.01	0.14
YDR132C	YDR132C || (1)	0.04	-0.05	0.11	0.06	0.03	0.05	0.62	-0.52	0.26	0.07	-0.88	-0.25
YDR133C	YDR133C || (1)	0.2	0.16	0.07	-0.25	0.17	0	-0.14	-0.31	0.08	0.13	1.18	1.76
YDR134C	YDR134C || (1)	0.57	0.61	0.32	0.31	0.51	0.36	0.3	-0.28	0.13	-0.05	0.85	2.87
YDR135C	YDR135C || YCF1 (1)	0.05	0.04	0.04	0.09	0.27	0.03	0	-0.13	0.44	0.24	0.07	-0.55
YDR136C	YDR136C || VPS61 (1)									0.94	-0.1		0.35
YDR137W	YDR137W || RGP1 (1)	0.49	0.41	0.72	0.37	0.37	0.46	0.45	-0.22	-0.03	0.16	0.1	0.03
YDR138W	YDR138W || HPR1 (1)	-0.02	0.04	0.07	-0.03	-0.12	-0.13	-0.11	-0.29	-0.01	-0.15	-0.44	-0.15
YDR139C	YDR139C || RUB1 (1)	-0.64	-0.43	-0.54	-0.38	-0.48	-0.45	-0.26	-0.34	-0.25	-0.42	-0.39	-0.07
YDR140W	YDR140W || (1)	-0.42	-0.28	-0.17	-0.12	-0.39	-0.32	-0.26	0.28	-0.31	0.26	0.13	0.18
YDR141C	YDR141C || DOP1 (1)	0.01	-0.23	-0.08	-0.2	-0.15	-0.28	-0.06	-0.2	-0.37	0.15	0.17	-0.21
YDR142C	YDR142C || PEX7 (1)	0.03	0.04	-0.01	-0.12	-0.03	-0.25	-0.03	-0.4	-0.03	-0.17	0.02	-0.34
YDR143C	YDR143C || SAN1 (1)	-0.06	-0.12	-0.25	-0.23	-0.15	-0.21	-0.3	0.12	0.03	-0.27	-0.65	-0.51
YDR144C	YDR144C || MKC7 (1)	0.08	0.08	-0.2	0.07	0.05	0.17	0.2	-0.21	-0.22	-0.36	-0.56	0.15
YDR145W	YDR145W || TAF12 (1)	0.18	0.11	0.16	0.22	0.1	0.12	0.06	-0.34	0.41	-0.09	-0.37	-0.14
YDR146C	YDR146C || SWI5 (1)	0.03	-0.11	0.2	-0.08	-0.02	-0.19	0.14	-0.03	-0.47	-0.02	0.08	0.49
YDR147W	YDR147W || EKI1 (1)									-0.34	-0.08	-0.54	-0.16
YDR148C	YDR148C || KGD2 (1)	0.32	0.2	-0.08	-0.03	0.24	0.07	0.03	-0.44	0.6	-0.01	0.7	-0.24
YDR149C	YDR149C || (1)	0.65	0.67	0.29		0.73	0.68			0.07	0.24	0.24	-0.21
YDR150W	YDR150W || NUM1 (1)	0.47	0.42	0.22	0.28	0.42	0.12	0.21	-0.82	0.29	-0.14	0.19	-0.15
YDR151C	YDR151C || CTH1 (1)	-0.07	-0.04	0.11	0	-0.1	0.02	0.08	0.26	-0.13	0.44	0.05	0.8
YDR152W	YDR152W || GIR2 (1)	-0.03	0.01	0.06	0.23	-0.07	0.22	-0.07	0.16	-0.52	-0.1	-0.45	-0.14
YDR153C	YDR153C || ENT5 (1)	-0.14	-0.33	-0.38	-0.44	-0.28	-0.31	-0.41	-0.52	-0.14	-0.27	-0.31	-0.24
YDR154C	YDR154C || (1)	0.05	0.34	-0.06	0.35	0.26	0.31	0.18	-0.52	0.28	-0.23	0.43	0.48
YDR155C	YDR155C || CPR1 (1)	0.05	0.23	-0.05	0.36	0.17	0.23	0.25	-0.16	0.69	-0.09	0.57	0.72
YDR156W	YDR156W || RPA14 (1)	0.32	0.42	-0.05	0.21	0.47	0.09	0.04	-0.11	-0.34	-0.34	-0.11	-0.28
YDR157W	YDR157W || (1)	-0.37	-0.55	-0.75	-0.57	-0.07	-0.13	-0.86	-0.97	-0.17	-0.89	-0.33	0.45
YDR158W	YDR158W || HOM2 (1)	-0.52	-0.62	-0.41	-0.8	-0.7	-0.7	-0.28	0.79	-0.02	0.37	-0.72	-0.74
YDR159W	YDR159W || SAC3 (1)	-0.05	-0.11	-0.18	-0.27	-0.23	-0.16	-0.2	-0.21	0.02	-0.24	-0.23	-0.28
YDR160W	YDR160W || SSY1 (1)	0.34	0.36	0.08	0.06	0.09	0.23	0.28	-0.17	-0.2	-0.55	-0.48	0.09
YDR161W	YDR161W || (1)	-0.03	-0.18	-0.02	0.13	-0.14	0.22	-0.07	0.13	-0.23	-0.26	-0.85	-0.58
YDR162C	YDR162C || NBP2 (1)	0.02	0.01	0.02	0.11	-0.06	0.11	0.01	0.56	0.07	0.43	0.08	-0.1
YDR163W	YDR163W || CWC15 (1)	-1.09	-0.93	-0.97	-0.89		-0.82	-1.25	0.27	0.01	0.32	0.5	0.12
YDR164C	YDR164C || SEC1 (1)	-0.13	-0.65	-0.32	-0.27					-0.12	0.12	-0.43	-0.62
YDR165W	YDR165W || TRM82 (1)	-0.24	-0.36	-0.27	-0.17	-0.49	-0.23	-0.27	0.05	-0.33	-0.56	-0.82	-0.19
YDR166C	YDR166C || SEC5 (1)	-0.31	-0.42	-0.23	-0.29	-0.34	-0.46	-0.49	0.04	-0.1	0	-0.21	-0.19
YDR167W	YDR167W || TAF10 (1)	-0.09	-0.17	0.24	0	-0.36	-0.08	-0.08	0.12	0.58	0.43	0.32	0.03
YDR168W	YDR168W || CDC37 (1)	-0.45	-0.43	-0.2	-0.18	-0.71	-0.48	-0.4	0.81	-0.06	0.2	-0.33	-0.71
YDR169C	YDR169C || STB3 (1)	0.04	-0.08	0.02	-0.08	0.1	-0.16	-0.14	-0.66	-0.26	-0.05	-0.2	0.13
YDR170C	YDR170C || SEC7 (1)	0.2	0.13	-0.05	0.12	0.34	0.12	0	-0.19	-0.35	-0.06	-0.12	-0.55
YDR171W	YDR171W || HSP42 (1)	0.16	0.42	0.15	0.81	0.88	0.83	0.14	-0.33	0.96	1.55	1.42	0.55
YDR172W	YDR172W || SUP35 (1)	-0.09	-0.2	-0.37	-0.18	-0.25	-0.16	-0.32	-0.51	0.19	-0.17	-0.48	-0.44
YDR173C	YDR173C || ARG82 (1)	-0.07	-0.02	0.02	0	-0.09	0.39	0.22	0.69	0.09	-0.01	-0.17	-0.65
YDR174W	YDR174W || HMO1 (1)	-0.3	-0.29	-0.54	-0.26	0.09	-0.72	-0.39	-0.8	0.06	-0.58	-0.73	0.08
YDR175C	YDR175C || RSM24 (1)	0.28	0.5	0.08	-0.09	0.36	0.05	0.3	-0.6	0.65	-0.31	0.15	-0.21
YDR176W	YDR176W || NGG1 (1)	0.16	-0.07	0.02	-0.04	0.21	-0.21	-0.21	-0.59	-0.14	-0.21	-0.41	0.04
YDR177W	YDR177W || UBC1 (1)	0.17	0.36	0.43	0.4	0.32	0.26	0.33	0.26	-0.39	0.19	0.02	0.09
YDR178W	YDR178W || SDH4 (1)	-0.11	0.13	-0.04	-0.23	0.11	-0.33	0	-0.2	0.29	0.25	1.34	0.18
YDR179C	YDR179C || CSN9 (1)	0.99	0.64	0.97	0.98		0.55	0.46	0.42	-0.16	0.37	0.56	0.53
YDR179W-A	YDR179W-A || (1)	0.35	0.23	0.24	0.44	0.26	0.64	0.48	0.55	-0.51	-0.26	-0.48	-0.08
YDR180W	YDR180W || SCC2 (1)					-0.21	0.45			-0.07	-0.32	-0.07	-0.19
YDR181C	YDR181C || SAS4 (1)	0.25	-0.01	-0.08	-0.2	0	-0.19	-0.06	-0.38	0.07	0.1	0.11	-0.22
YDR182W	YDR182W || CDC1 (1)	-0.19	-0.27	-0.06	-0.21	-0.15	-0.01	-0.2	-0.34	0.07	0.02	-0.16	-0.05
YDR183W	YDR183W || PLP1 (1)	0.24	0.24	0.44	0.4	0.15	0.56	0.48	0.41	-0.34	0.1	-0.11	0.32
YDR184C	YDR184C || ATC1 (1)	0.02	-0.11	0.03	0.16	0.03	0.21	0.06	0.43	-0.15	-0.53	-0.81	-0.15
YDR185C	YDR185C || (1)	-0.05	0.01	-0.1	-0.4	-0.09	-0.24	0.2	0.16	0.29	-0.08	0.34	0.18
YDR186C	YDR186C || (1)	0.39	0.1	0.23	0.3	0.42	0.26	0.2	-0.13	-0.04	0.15	-0.26	0.19
YDR187C	YDR187C || (1)	-0.22	-0.56	-0.76	-0.59	-0.65	-0.69	-0.64		0.04	-0.55	-0.8	-1.35
YDR188W	YDR188W || CCT6 (1)	-0.24	-0.21	-0.46	-0.27	-0.31	-0.5	-0.29	-0.51	0.33	-0.19	-0.42	-0.55
YDR189W	YDR189W || SLY1 (1)	0.04	-0.01	-0.27	-0.19	-0.22	-0.22	-0.21	0.03	0.07	-0.13	-0.45	-0.25
YDR190C	YDR190C || RVB1 (1)	-0.08	-0.15	0.1	-0.08	-0.12	-0.07	-0.26	0.23	-0.12	-0.05	-0.25	-0.15
YDR191W	YDR191W || HST4 (1)	0.44	0.54	0.45	0.22	0.5	0.46	0.25	-0.16	-0.29	-0.18	-0.13	0.14
YDR192C	YDR192C || NUP42 (1)	-0.04	-0.19	-0.17	-0.06	-0.3	-0.2	-0.4	-0.46	-0.25	-0.02	-0.39	-0.47
YDR193W	YDR193W || (1)	0.15	0.59	0.25						0.22	0.22	0.19	0.43
YDR194C	YDR194C || MSS116 (1)	-0.14	-0.36	-0.6	-0.57	-0.4	-0.79	0.03	-0.32	0.28	-0.46	0.01	0.68
YDR195W	YDR195W || REF2 (1)	-0.13	-0.27	-0.15	-0.12	-0.42	-0.22	-0.22	-0.28	0.09	0.21	0	0.17
YDR196C	YDR196C || (1)	0.32	0.42	0.15	0.45	-0.06	0.36	0.43	0.06	-0.02	0.11	0.64	0.38
YDR197W	YDR197W || CBS2 (1)	0.16	0.26	0.1	-0.08	0.13	0.24	0.19	0.32	0.02	-0.17	0.38	0.26
YDR198C	YDR198C || (1)	-0.11	-0.06	0.12	0.04	-0.17	0.02	-0.1	0.2	-0.16	-0.06	-0.06	-0.42
YDR199W	YDR199W || (1)	-0.84	-0.7	-0.72	-0.67	-0.81	-0.65	-0.72		0.13
YDR200C	YDR200C || VPS64 (1)	0.17	0.25	0.17	0.17	0.1	0.14	0.2	0.1	-0.07	0.19	0.17	0.09
YDR201W	YDR201W || SPC19 (1)	0.03	0.04	0.15	-0.14	-0.23	-0.34	-0.04	-0.29	-0.25	0.09	-0.02	0.18
YDR202C	YDR202C || RAV2 (1)	0.4	0.53	0.47	0.3	0.14	0.52	0.31	0	0.2	0.18	0.29	0.29
YDR203W	YDR203W || (1)									0.14	-0.08	-0.09	-0.25
YDR204W	YDR204W || COQ4 (1)	-0.78	-0.4	-0.92	-0.78	-0.58	-0.69	-0.78	-0.74	-0.1	-0.32	0.2	-0.21
YDR205W	YDR205W || MSC2 (1)	0.1	-0.14	-0.05	-0.01	0.05	0.2	-0.04	-0.18	0.07	0.14	-0.08	0.42
YDR206W	YDR206W || EBS1 (1)	-0.26	-0.4	-0.42	-0.24	-0.19	-0.23	-0.23	0.06	-0.01	-0.37	-0.57	-0.27
YDR207C	YDR207C || UME6 (1)	0.06	-0.56	-0.12	0.11		-0.07	-0.15	-0.41	0.11	-0.27	-0.43	-0.41
YDR208W	YDR208W || MSS4 (1)	0.44	0.02	0.15	0.02	0.01	0.04	0.04	-0.25	-0.26	-0.37	-0.34	0.13
YDR209C	YDR209C || (1)	-0.5	-0.79	-0.65	-0.15	-0.39	-0.38	-0.22		-0.73
YDR210W	YDR210W || (1)	-0.19	-0.46	-0.21	0.38	-0.05	0.05	0.28	0.75	-0.21	-0.24	-0.34	0.31
YDR211W	YDR211W || GCD6 (1)	-0.04	-0.16	0.1	0.16	-0.12	0.22	0.08	0.23	-0.48	-0.19	-0.51	-0.52
YDR212W	YDR212W || TCP1 (1)	-0.37	-0.2	-0.42	-0.23	-0.49	-0.3	-0.27	0.22	0.11	-0.26	-0.27	-0.37
YDR213W	YDR213W || UPC2 (1)		0.71		0.85					-0.21	0.05	-0.23	-0.73
YDR214W	YDR214W || AHA1 (1)	-0.42	-0.26	-0.28	-0.24	-0.28	-0.25	-0.49	-0.17	-0.72	0.28	0.35	-0.09
YDR215C	YDR215C || (1)									0.43		0.65
YDR216W	YDR216W || ADR1 (1)		0.58	0.39	1.53		1.05	0.06	0.97	0.59	1.61	2.35	0.43
YDR217C	YDR217C || RAD9 (1)	0.28	0.18	0.44	0.45	0.24	0.32	0.42	-0.12	-0.09	0.15	-0.48	0.07
YDR218C	YDR218C || SPR28 (1)		-1.3	-0.04	-0.49	-0.06	-0.37		0.89	0	0.75	-0.05	1.09
YDR219C	YDR219C || (1)	-0.17	-0.41	0.07	-0.34	-0.29	-0.2	-0.43	-0.08	-0.03	-0.08	0.03	-0.13
YDR220C	YDR220C || (1)												-0.22
YDR221W	YDR221W || (1)	-0.01	0.16	0.48	0.39	0.07	-0.06	0.5	0.17	0.08	0.27	-0.09	0.16
YDR222W	YDR222W || (1)	-0.16	-0.03	-0.51	0.04	-0.25	0.26	-0.2	-0.32	-0.82	-0.96	-0.96	1.12
YDR223W	YDR223W || CRF1 (1)		0.3	0.23						1.01	0.27	0.48	0.01
YDR224C	YDR224C || HTB1 (1)	0.13	-0.44	0.27	-0.02	0.19	-0.04	-0.03	-0.56	0.65	0.02	0.2	1.09
YDR225W	YDR225W || HTA1 (1)	0.51	-0.24	0.4	0.06	0.38	0.24	0.11	-0.29	0.76	-0.13	0.1	0.49
YDR226W	YDR226W || ADK1 (1)	0.06	0.12	0.04	0.04	0.02	0.04	0.22	0.03	-0.31	-0.52	-0.33	-0.12
YDR227W	YDR227W || SIR4 (1)									-0.02	-0.18	-0.41	-0.16
YDR228C	YDR228C || PCF11 (1)	0.01	0.14	0.05	0.06	0.05	0.25	0.04	-0.28	-0.04	-0.33	-0.24	-0.11
YDR229W	YDR229W || IVY1 (1)	-0.52	-0.47	-0.43	-0.67	-0.59	-0.6	-0.59	-0.7	0.07	-0.1	-0.08	-0.22
YDR230W	YDR230W || (1)	-0.99	-0.72	-0.84	-1.17	-1.07	-1.04	-0.98	-2.62	-0.06	0.03	0.28	-0.41
YDR231C	YDR231C || COX20 (1)	-0.06	0.08	0.17	-0.4	-0.13	-0.31	0.03	-0.23	0.2	0.28	0.87	-0.54
YDR232W	YDR232W || HEM1 (1)	-0.02	0.01	-0.13	-0.32	0.11	-0.3	-0.1	-0.98	-0.71	-0.25	-0.04	0.25
YDR233C	YDR233C || RTN1 (1)	-0.15	-0.22	-0.38	-0.26	-0.26	-0.15	-0.37	0.2	-0.35	-0.46	-0.37	1.28
YDR234W	YDR234W || LYS4 (1)	0.4	-0.2	-0.14	0.12	0.29	0	0.2	0.31	-0.14	-0.2	-0.23	-0.18
YDR235W	YDR235W || PRP42 (1)	0.7	0.47	0.53	0.43	0.54	0.7	0.56	-0.23	-0.31	-0.22	-0.18	0.02
YDR236C	YDR236C || FMN1 (1)	-0.17	0.22	0.12	-0.23	0.01	-0.06	-0.09	-0.19	-0.23	0.17	-0.35	-0.13
YDR237W	YDR237W || MRPL7 (1)	-0.11	-0.17	-0.41	-0.67	-0.34	-0.56	-0.04	-0.78	0.47	-0.49	-0.03	-0.42
YDR238C	YDR238C || SEC26 (1)	0.01	-0.09	0	-0.03	-0.02	-0.19	-0.14	0.03	-0.26	-0.09	-0.29	-0.53
YDR239C	YDR239C || (1)	-0.08	-0.07	0.04	-0.02	-0.1	-0.1	-0.07	-0.16	-0.2	-0.03	-0.25	-0.42
YDR240C	YDR240C || SNU56 (1)	-0.15	-0.25	-0.11	-0.29	-0.39	-0.31	-0.4	-0.76	-0.03	-0.29	-0.36	0.01
YDR241W	YDR241W || BUD26 (1)							-0.16
YDR242W	YDR242W || AMD2 (1)	0.03	-0.02	0.71	-0.01	0.21	-0.35	0.11	0.69	-0.11	0.31	0.46	-0.15
YDR243C	YDR243C || PRP28 (1)	-0.39	-0.57	-0.18	-0.24	-0.4	-0.73	-0.21	0.23	0.19	0.1	-0.26	-0.6
YDR244W	YDR244W || PEX5 (1)	0.18	0.08	0.32	0.09	0.17	0.6	0.33	-0.31	-0.01	0.2	0	-0.26
YDR245W	YDR245W || MNN10 (1)	0.05	-0.2	0.19	0.1	-0.11	0.13	0.03	0.05	0.01	-0.1	-0.41	-0.02
YDR246W	YDR246W || TRS23 (1)	-0.27	-0.31	-0.27	-0.3	-0.27	-0.29	-0.31	-0.08	0.04	0.02	0.43	0.13
YDR247W	YDR247W || VHS1 (1)									-0.01	0.09	0.48	1.35
YDR248C	YDR248C || (1)	0.15	0.72	0.85	0.39	0.54	0.33	0.45	-0.02	-0.43	0.1	0.33	0.07
YDR249C	YDR249C || (1)	-0.1	-0.46	-0.15	0.15	-0.03	0.04	0.07	0.31	-0.64	-0.12	-0.11	-0.29
YDR250C	YDR250C || (1)									-0.1	0.45	-0.07	-0.05
YDR251W	YDR251W || PAM1 (1)	0.41	0.29	0.18	0.21	0.35	0.38	0.32	-0.14	0.18	0.23	0.36	0.13
YDR252W	YDR252W || BTT1 (1)	-0.03	-0.13	0.11	-0.11	0.07	0.4	0.39	-0.23	-0.23	-0.15	-0.42	0.09
YDR253C	YDR253C || MET32 (1)	-0.87	-1.28	-0.78	-0.51			-0.96		-0.43	-0.23	0.61	-0.49
YDR254W	YDR254W || CHL4 (1)	0.81	0.92	0.98	0.75	1.13	0.93	0.82	-0.02	-0.27	0.29	0.1	0.04
YDR255C	YDR255C || RMD5 (1)	0.18	0.33	0.55	0.05		0.03	0.18	0.59	0.6	0.58	1.02	1.63
YDR256C	YDR256C || CTA1 (1)	0.27	0.06	-0.19	-0.22	-0.2	-0.13	-0.03	0.11	0.18	-0.2	0.33	-0.39
YDR257C	YDR257C || SET7 (1)	-0.2	-0.44	0.05	0.05		-0.02	-0.39	0.83	-0.15	-0.12	-0.26	-0.66
YDR258C	YDR258C || HSP78 (1)	0.17	0.44	0.49	0.45	0.39	0.53	0.45	-1.03	0.02	0.45	1.12	0.54
YDR259C	YDR259C || YAP6 (1)	-0.46	-0.26	0.46	0.32		-0.12		1.02	-0.56	0.78	1.2	0.51
YDR260C	YDR260C || SWM1 (1)	-0.32	-0.43	-0.32	-0.62	-0.45	-0.39	-0.44	0.15	0.01	0.11	-0.5	0.58
YDR261C	YDR261C || EXG2 (1)	0.1	0.09	-0.1	0.19	0.19	0.25	0.15	0.48	-0.09	-0.24	0.36	0
YDR262W	YDR262W || (1)	0.65	-0.3	1.28	0.62		0.85	0.7	0.32	0.22	0.75	0.51	0.51
YDR263C	YDR263C || DIN7 (1)	0.16	0.17	-0.13	0.02	0.03	-0.08	-0.06	-0.27	-0.42	-0.08	-0.03	0.01
YDR264C	YDR264C || AKR1 (1)	-0.1	-0.04	0.18	0.01		0.39	0.18	-0.03	-0.37	0.69	-0.2	-0.14
YDR265W	YDR265W || PEX10 (1)	-0.06	0.18	-0.04	-0.21	-0.11	-0.15	-0.12	-0.41	0.12	-0.05	-0.11	-0.23
YDR266C	YDR266C || (1)	-0.28	-0.38	-0.48	-0.32	-0.34	-0.49	-0.47	-0.2	-0.48	-0.56	-0.84	-0.33
YDR267C	YDR267C || (1)	0.26	0.21	0.63	0.3	0.12	0.37	0.26	-0.03	-0.36	-0.28	-0.3	-0.18
YDR268W	YDR268W || MSW1 (1)	-0.15	-0.11	-0.06	-0.15	0.06	-0.22	0.05	-0.54	-0.18	0.02	0.05	0.21
YDR269C	YDR269C || (1)			-0.05	-0.07			0.38		0.06	-0.12	-0.02	-0.06
YDR270W	YDR270W || CCC2 (1)	0.14	0.34	0	-0.12	0.2	-0.17	0.74	-0.42	-0.24	0.6	0.24	0.14
YDR271C	YDR271C || (1)	-0.99	-1.18	-1.51	-1.37	-1.1	-1.38	-0.72		-0.14	0.1
YDR272W	YDR272W || GLO2 (1)	-0.35	-0.18	0.02	-0.09	-0.11	-0.2	-0.35	0.11	-0.06	0.15	0.36	-0.11
YDR273W	YDR273W || DON1 (1)	-0.43	-0.39	-0.67	-0.45	-0.66	-0.28	-0.86	-0.01	0.07	0.22	-0.02	-0.78
YDR274C	YDR274C || (1)									-0.37
YDR275W	YDR275W || BSC2 (1)	0.83	0.77	0.98	0.89		0.96	0.62	-0.18	-0.27	0.26	-0.5	0.24
YDR276C	YDR276C || PMP3 (1)	-0.05	0.16	0.07	-0.03	-0.1	-0.12	-0.08	0.03	0	0	0.14	1.32
YDR277C	YDR277C || MTH1 (1)	0.23	-0.37	-1.29	-0.43				-1.14	0.23	0.17	1.02	-0.36
YDR278C	YDR278C || (1)			-0.66						-0.28	-0.2	-0.38	0.1
YDR279W	YDR279W || RNH202 (1)	0	-0.08	0.16	-0.13	-0.03	0.13	0.02	-0.08	-0.17	-0.01	-0.24	-0.11
YDR280W	YDR280W || RRP45 (1)	0	0.17	0.17	0.11		0.23	0.07	0	-0.25	-0.25	-0.69	-0.02
YDR281C	YDR281C || PHM6 (1)	-0.61	-0.85	-0.6	-0.23	-1.75	-1.67	-0.95	-0.99	-3.37	-2.04	-4.33	-2.13
YDR282C	YDR282C || (1)	0.01	-0.03	-0.06	-0.11			0.17	-0.67	0.19	-0.03	0.13	-0.62
YDR283C	YDR283C || GCN2 (1)	0.27	0.25	0.13	0.11	0.18	0.06	0.09	0.05	-0.49	0.02	-0.12	-0.23
YDR284C	YDR284C || DPP1 (1)	0.32	0.43	0.41	0.41	0.35	0.5	0.33	0.63	-0.13	-0.08	-0.11	0.1
YDR285W	YDR285W || ZIP1 (1)	0.27	0.4	0.23	0.19	0.68	0.32	0.51	0.05	0.18	0.05	-0.35	-0.23
YDR286C	YDR286C || (1)	0.24	0.41	0.16	0.22	0.51	0.5	0.47	-0.81	0.41	0.07	0.62	0.53
YDR287W	YDR287W || (1)	-0.35	-0.25	-0.32	-0.38	-0.46	-0.64	-0.55		0.04	0.2	0.48	-0.15
YDR288W	YDR288W || NSE3 (1)	-0.48	-0.66	-0.5	-0.58	-0.78	-0.55	-0.44	-0.02	-0.16	-0.43	-0.24	-0.23
YDR289C	YDR289C || RTT103 (1)	-0.01	-0.19	0.2	0.41	-0.15	-0.02	0.13	0.61	0.15	0.37	0.12	-0.29
YDR290W	YDR290W || (1)								-2	0.13
YDR291W	YDR291W || (1)	0.01	0.18	0.02	0.21	0.31	0.11	-0.18	0.24	-0.03	-0.13	-0.08	-0.31
YDR292C	YDR292C || SRP101 (1)	-0.03	-0.08	-0.09	-0.14	0.1	-0.06	-0.31	-0.05	-0.21	-0.03	-0.58	-0.56
YDR293C	YDR293C || SSD1 (1)	0.19	-0.06	-0.04	0.23	0.47	0.01	0.25	0.14	-0.04	0.09	0.39	0.53
YDR294C	YDR294C || DPL1 (1)	-0.08	-0.03	-0.02	-0.12	0.01	0.15	-0.16	0.21	-0.36	0.44	0.54	-0.29
YDR295C	YDR295C || HDA2 (1)	-0.24	-0.18	0	-0.05	-0.19	-0.26	-0.22	0.06	0	-0.01	-0.28	-0.18
YDR296W	YDR296W || MHR1 (1)	-0.12	-0.19	-0.37	-0.47	-0.21	-0.57	-0.05	-0.72	0.54	-0.4	0.49	-0.16
YDR297W	YDR297W || SUR2 (1)	-0.09	-0.22	-0.2	0.04	0.14	-0.15	0.07	0.09	0.03	0.01	-0.24	-0.12
YDR298C	YDR298C || ATP5 (1)	-0.35	-0.35	-0.64	-0.4	-0.38	-0.6	-0.41	-0.34	0.25	-0.17	0.9	-0.01
YDR299W	YDR299W || BFR2 (1)	-0.27	-0.62	-0.56	-0.14	-0.11	-0.38	-0.33	0.13	-0.13	-0.26	-0.79	-0.52
YDR300C	YDR300C || PRO1 (1)	-0.76	-0.97	-0.83	-0.72	-1.13	-0.8	-0.85	0	-0.51	-0.62	-0.87	-0.43
YDR301W	YDR301W || CFT1 (1)	-0.24	-0.31	-0.39	-0.36	-0.38	-0.43	-0.42	-0.42	-0.1	-0.26	-0.46	-0.59
YDR302W	YDR302W || GPI11 (1)	0.44	0.29	0.52	0.55	0.53	0.88	0.68	0.16	-0.16	0.01	-0.18	0
YDR303C	YDR303C || RSC3 (1)	-0.04	0.27	0.09	0.07	0.03	-0.01	-0.05	0.18	-0.31	-0.09	-0.49	-0.11
YDR304C	YDR304C || CPR5 (1)	0.04	0.15	0.04	0.3	0.04	0.17	0.18	0.23	0.36	0.26	0.3	0.18
YDR305C	YDR305C || HNT2 (1)	-0.37	-0.28	-0.2	-0.48	-0.35	-0.38	-0.24	-0.28	-0.41	-0.02	0.06	-0.11
YDR306C	YDR306C || (1)	-0.02	-0.16	0.01	0	-0.17	-0.19	0.07	0.1	0.15	-0.07	-0.03	-0.3
YDR307W	YDR307W || (1)	-0.31	-0.3	-0.26	-0.24		-0.01	-0.29	-0.28	0.06	0.11	-0.3	-0.08
YDR308C	YDR308C || SRB7 (1)	0.51	0.67	0.84	0.68	0.5	0.71	0.59	-0.35	-0.09	0.32	-0.16	0.36
YDR309C	YDR309C || GIC2 (1)	0.07	-0.2	0.15	-0.01	0.17	0.12	-0.12	-0.4	-0.15	0.11	0.53	0.42
YDR310C	YDR310C || SUM1 (1)	-0.2	-0.21	-0.35	-0.29	-0.15	-0.35	-0.22	-0.4	-0.36	-0.56	-0.62	-0.33
YDR311W	YDR311W || TFB1 (1)									0.08	-0.24	-0.37	-0.33
YDR312W	YDR312W || SSF2 (1)	-0.36	-0.35	-0.28	0.05	-0.44	-0.27	-0.1	0.19	-0.31	-0.1	-0.55	-0.27
YDR313C	YDR313C || PIB1 (1)	0.11	0	0.05	0.07	0.03	0.02	-0.04	-0.16	0.45	0.05	0.24	-0.14
YDR314C	YDR314C || (1)									-0.06	-0.36	-0.7	-0.81
YDR315C	YDR315C || IPK1 (1)	0.18	0.47	-0.05	0.29	-0.1	0.15	0.25	0.54	0.03	0.11	0.51	0.55
YDR316W	YDR316W || OMS1 (1)	0.15	0.15	0.07	-0.15		-0.2	0.26	0.09	0.53	-0.06	0.78	0.12
YDR317W	YDR317W || HIM1 (1)		0.18		-0.41					0.06	0.9	-0.84	0.26
YDR318W	YDR318W || MCM21 (1)	1.41	1.66	1.02	0.51	2.05	1.2	1.35	-0.11	0.12	0.1	0.44	-0.05
YDR319C	YDR319C || (1)	0.54	0.25	0.69	0.39	0.56	0.34	0.69	0.25	-0.1	0.39	0.27	0.06
YDR320C	YDR320C || SWA2 (1)	0.02	0.14	0.17	0.01					-0.08	0.18	-0.13	-0.6
YDR320C-A	YDR320C-A || DAD4 (1)	-0.28	-0.3	0.02	-0.37	-0.5	-0.41	-0.22	-0.58	-0.29	-0.19	0.49	0.56
YDR321W	YDR321W || ASP1 (1)	-0.44	-0.51	-0.82	-0.37	-0.76	-0.41	-0.52	0.18	-0.39	-0.44	-0.7	-0.65
YDR322C-A	YDR322C-A || TIM11 (1)	0.68	1.26	0.55	0.74	0.93	0.99	1.01	-0.18	-0.01	0.04	0.97	0.64
YDR322W	YDR322W || MRPL35 (1)	0.23	0.18	0.13	0.1		0.27	0.07	-0.59	0.15	-0.16	0.09	-0.02
YDR323C	YDR323C || PEP7 (1)	0.21	0.24	0.18	0.13	-0.05	0.3	0.18	0.15	-0.15	-0.34	-0.06	0.18
YDR324C	YDR324C || UTP4 (1)	0.15	-0.06	-0.04	0.18	-0.12	-0.01	-0.1	-0.57	-0.02	-0.5	-0.89	-0.2
YDR325W	YDR325W || YCG1 (1)	-0.04	-0.24	0.32	-0.06	-0.44	-0.33	-0.1	0.19	-0.08	0.07	-0.08	-0.15
YDR326C	YDR326C || (1)	-0.04	-0.19	0.04	-0.14	-0.24	-0.24	0	0.45	-0.32	-0.26	-0.27	0.15
YDR327W	YDR327W || (1)	-0.57	-0.47	-0.46	-0.68	-0.65	-0.45	-0.48	-0.85	-0.47	-0.16	-0.2	0.01
YDR328C	YDR328C || SKP1 (1)	0.04	0.19	0.15	0.07	-0.06	0.15	0.01	0.21	0.02	0.04	0.03	-0.36
YDR329C	YDR329C || PEX3 (1)	-0.14	-0.21	0.04	-0.16	-0.2	-0.16	-0.38	-0.15	0.35	0.03	-0.09	-0.12
YDR330W	YDR330W || UBX5 (1)	0.03	0.15	-0.24	-0.1	-0.06	-0.1	-0.33	-0.29	0.28	-0.02	0.16	-0.32
YDR331W	YDR331W || GPI8 (1)	-0.24	-0.39	-0.23	-0.42	-0.45	-0.25	-0.43	-0.1	-0.1	-0.1	-0.52	0.75
YDR332W	YDR332W || (1)			-0.36	-0.16					-0.14	-0.41	-0.55	-0.49
YDR333C	YDR333C || (1)	-0.33	-0.4	-0.17	-0.17		-0.23	-0.49	-0.05	-0.08	-0.28	-0.41	-0.33
YDR334W	YDR334W || SWR1 (1)	0.08	0.05	-0.17	-0.09	-0.1	-0.04	-0.44	-0.19	0	-0.35	-0.26	-0.1
YDR335W	YDR335W || MSN5 (1)	-0.08	0.07	0.12	0.15	-0.09	0.02	-0.17	-0.07	-0.36	0.1	-0.12	-0.03
YDR336W	YDR336W || (1)	-0.57	-0.77	-0.45	-0.42	-0.19	0.16	-0.49	-0.35	-0.19	-0.39	-0.43	-0.34
YDR337W	YDR337W || MRPS28 (1)	0.03	-0.11	-0.19	-0.28	-0.17	-0.51	0.22	-0.37	0.48	-0.44	0.47	0.39
YDR338C	YDR338C || (1)		0.27	0.18	0.07	-0.01	0.59	0.06	-0.14	-0.1	-0.18	-0.27	-0.27
YDR339C	YDR339C || (1)	0.37	0.47	0.48	0.35	0.35	0.52	0.42	0.2	-0.16	0.07	-0.25	0.26
YDR341C	YDR341C || (1)	-0.26	-0.34	-0.17	-0.15	-0.33	-0.22	-0.22	0.28	-0.18	-0.11	-0.6	-0.37
YDR342C	YDR342C || HXT7 (1)	3.56	2.71	-1	-0.46	3.22	2.62	2.46	2.72	5.34	5.36	5.83	3.77
YDR343C	YDR343C || HXT6 (1)	3.84	2.59	-0.93	-0.77	3.1	2.39	2.42	2.95	5.12	5.23	5.6	3.62
YDR345C	YDR345C || HXT3 (1)	0.22	0.5	0.36	0.38	0.62	0.19	0.19	0.35	-1.11	-1.58	-0.82	0.02
YDR346C	YDR346C || SVF1 (1)	-0.33	-0.34	-0.26	-0.07	-0.32	-0.21	-0.28	0.11	-0.19	-0.06	-0.47	-0.54
YDR347W	YDR347W || MRP1 (1)	-0.05	-0.07	-0.23	-0.45	0.01	-0.54	0.07	-1.06	0.42	-0.06	0.38	0.14
YDR348C	YDR348C || (1)	0.06	-0.04	0.02	0.1	0.1	-0.01	0	-0.33	-0.31	-0.11	-0.05	-0.05
YDR349C	YDR349C || YPS7 (1)	0.11	0.24	0.17	0.31	0.11	0.35	0.27	0.42	0.01	0.08	0.34	0.04
YDR350C	YDR350C || TCM10 (1)	0.46	0.39	0.3	0.71	1.09	0.59	0.59	0.24	-0.1	-0.02	0.48	0.1
YDR351W	YDR351W || SBE2 (1)	-0.11	0.05	0.05	-0.1	0.02	-0.04	0.09	0.46	-0.16	0.01	0.4	-0.09
YDR352W	YDR352W || (1)	0.34	-0.04	0.24	-0.16	0.24	-0.02	-0.1	0.15	0.07	-0.15	-0.79	-0.12
YDR353W	YDR353W || TRR1 (1)	-0.18	-0.2	-0.57	-0.18	-0.21	-0.38	-0.4	-0.42	-0.1	-0.25	-0.33	-0.64
YDR354W	YDR354W || TRP4 (1)	0.23	0.23	0.77	0.12	0.17	0.26	0.18	0.34	-0.71	-0.13	-0.6	0.45
YDR355C	YDR355C || (1)									-0.1
YDR356W	YDR356W || SPC110 (1)	0.37	0.21	0.23	0.07	0.69	0.29	0.29	-0.49	0.1	-0.31	-0.54	-0.63
YDR357C	YDR357C || (1)	-0.25	-0.23	-0.05	0.1	-0.45	-0.08	-0.24	-0.02	0.24	0.35	0.64	0.16
YDR358W	YDR358W || GGA1 (1)	-0.18	0.42	0.79	0.37				-0.17	0.24	0.57	0.73	0.27
YDR359C	YDR359C || VID21 (1)	0.01	-0.1	0.07	-0.1	-0.21	-0.02	-0.25	0.17	-0.09	-0.37	-0.62	0.84
YDR360W	YDR360W || (1)	0.56	0.5	-0.28	0.57	0.11	0.91			-0.08	-0.12	0.09	-0.23
YDR361C	YDR361C || BCP1 (1)	-0.5	-0.57	-0.36	-0.39	-0.9	-0.17	-0.32	0.25	-0.27	-0.4	-0.9	-0.42
YDR362C	YDR362C || TFC6 (1)	-0.05	0.07	-0.03	-0.15	-0.05	-0.06	-0.31	-0.35	0.05	0.09	-0.16	-0.15
YDR363W	YDR363W || ESC2 (1)	0	-0.06	-0.03	0.17	0.24	-0.44	0.02	0.59	0.06	0.25	-0.18	-0.63
YDR363W-A	YDR363W-A || SEM1 (1)	-0.09	0.2	0.06	-0.2	-0.06	0.1	0.03	-0.11	-0.32	-0.02	-0.09	-0.3
YDR364C	YDR364C || CDC40 (1)	0.04	-0.13	-0.33	-0.01	-0.04	-0.14	0.03	0.34	0.03	-0.47	-0.41	-0.34
YDR365C	YDR365C || ESF1 (1)	0.09	-0.08	-0.14	0.28	0.02	0.17	-0.01	-0.4	0.02	0.13	-0.87	-0.57
YDR366C	YDR366C || (1)	-0.68	-0.87	-0.32	-0.25	-0.38	-0.28	-0.07		0.15	-0.04		0.12
YDR367W	YDR367W || (1)	-0.26	-0.2	-0.03	-0.19	-0.45	-0.03	-0.24	-0.51	-0.31	-0.21	-0.28	0.13
YDR368W	YDR368W || YPR1 (1)	0.18	0.07	-0.17	0.07	0.2	0.2	-0.12	0.22	-0.04	-0.22	-0.16	0.09
YDR369C	YDR369C || XRS2 (1)	-1.14	-0.05	0.08	-0.29	0.1	-0.11	-0.28	0.23	-0.48	-0.18	-0.32	0.04
YDR370C	YDR370C || (1)	-0.07	0.08	0.13	-0.1	-0.12	0.01	0.1	0.2	0.2	0.28	0.08	0.32
YDR371W	YDR371W || CTS2 (1)	-0.04	0.13	0.14	-0.13	-0.15	0.11	0.03	0.35	-0.42	0.48	0.02	-0.43
YDR372C	YDR372C || VPS74 (1)	-0.19	-0.38	-0.19	-0.47		-0.18	-0.29	0.48	-0.19	-0.07	-0.38	0.15
YDR373W	YDR373W || FRQ1 (1)	0.61	0.71	0.68	0.75	0.49	0.59	0.77	0.26	-0.64	0.26	-0.1	0.17
YDR374C	YDR374C || (1)									0.31	0.61	1.24	0.43
YDR375C	YDR375C || BCS1 (1)	0.14	0.26	-0.3	-0.22	0.35	-0.46	0.17	-0.58	0.38	-0.22	0.24	-0.09
YDR376W	YDR376W || ARH1 (1)	-0.45	-0.14	-0.55	-0.38	-0.35	-0.29	-0.17	-0.02	-0.33	0.13	0.23	-0.27
YDR377W	YDR377W || ATP17 (1)	0.2	0.1	0.22	0.18	0.24	0.2	0.54	-0.63	0.08	-0.09	1.11	0.82
YDR378C	YDR378C || LSM6 (1)	-0.04	-0.04	0.23	-0.02	-0.09	0.2	-0.02	-0.1	-0.32	-0.13	-0.29	0.51
YDR379C-A	YDR379C-A || (1)	-0.21	0.67	0.32	-0.24	-0.02	0.05	0.12	0.16	0.77	0.61	1.01	0.43
YDR379W	YDR379W || RGA2 (1)	0.17	0.22	0.17	0.08	0.2	0.17	-0.01	0.14	-0.07	0.12	0.13	-0.32
YDR380W	YDR380W || ARO10 (1)	-0.26	1.21	-0.53	-0.72	0.11	-0.52	-0.34	-1.47	-0.2	-1.12	-0.63	0.4
YDR381C-A	YDR381C-A || (1)									0.49	0.06	0.95	0.57
YDR381W	YDR381W || YRA1 (1)	-0.44	-0.61	-0.39	-0.76	-0.65	-0.45	-0.5	0.02	0.33	-0.29	-0.29	-0.32
YDR382W	YDR382W || RPP2B (1)	0.23	0.25	0.19	0.37	0.29	0.38	0.45	-0.03	0.12	0.6	0.66	1.28
YDR383C	YDR383C || NKP1 (1)	0.28	0.44	0.6	0.15	0.48	0.41	0.26	-0.12	0.05	0.01	0.04	0.42
YDR384C	YDR384C || ATO3 (1)	-0.16	-0.95	-0.82	-0.14	-0.87	0.21	-0.32	0.14	0.14	0.31	-0.63	-0.39
YDR385W	YDR385W || EFT2 (1)	-0.41	-0.67	-0.76	-0.55	-0.5	-0.71	-0.53	-0.07	0.59	-0.21	0.5	-0.05
YDR386W	YDR386W || MUS81 (1)	0.09	0.35	0.25	0.27	0.19	0.14	0.07	0.05	0.07	0.03	0.02	-0.15
YDR387C	YDR387C || (1)	-0.45	-0.33	-0.39	-0.52	-0.36	-0.41	-0.48	-0.03	0.04	-0.36	0.15	-0.03
YDR388W	YDR388W || RVS167 (1)	-0.08	-0.08	-0.19	-0.28	-0.07	-0.49	-0.64	-0.32	0.07	0.14	0.32	-0.21
YDR389W	YDR389W || SAC7 (1)	-0.04	-0.05	0.34	0.34				-0.16	0	-0.33	-0.38	1.98
YDR390C	YDR390C || UBA2 (1)	-0.06	-0.24	0.03	-0.09	-0.39	0.15	-0.27	0.01	-0.19	0.09	-0.04	-0.07
YDR391C	YDR391C || (1)	0.12	0.01	-0.28	0.73		-0.02	-0.08		0.43	0.97	0.51	0.35
YDR392W	YDR392W || SPT3 (1)	-0.01	-0.16	0.17	0.01	-0.11	-0.04	-0.03	0.07	0.11	0.19	0.07	-0.12
YDR393W	YDR393W || SHE9 (1)	0.1	-0.08	-0.02	-0.34	0	-0.34	0.06	-0.41	0.29	-0.51	-0.18	-0.43
YDR394W	YDR394W || RPT3 (1)	-0.49	-0.39	-0.43	-0.37	-0.56	-0.4	-0.48	0	0.25	0.25	-0.2	-0.4
YDR395W	YDR395W || SXM1 (1)	-0.07	-0.57	-0.45	-0.33	-0.28	-0.33	-0.26	0.09	-0.21	-0.08	-0.4	-0.03
YDR396W	YDR396W || (1)	-0.78	-0.7	-0.49	-0.41	-0.92	-0.64	-0.74		-0.27	-0.38	-0.18	-0.36
YDR397C	YDR397C || NCB2 (1)	-0.05	0.14	0.25	0.22	-0.03	0.17	0.05	-0.19	-0.23	0	0.03	0.04
YDR398W	YDR398W || UTP5 (1)	0.2	-0.09	-0.03	0.1	0	-0.07	-0.05	-0.25	-0.13	-0.6	-1.05	-0.31
YDR399W	YDR399W || HPT1 (1)	0	-0.01	0.4	0.32	0.04	0.03	0.54	0.18	-0.86	-0.47	-0.74	-0.61
YDR400W	YDR400W || URH1 (1)	-0.11	-0.19	-0.18	-0.05	-0.38	-0.38	-0.31	0.13	-0.35	-0.24	-0.44	0
YDR401W	YDR401W || (1)									0.49
YDR402C	YDR402C || DIT2 (1)									-0.23	0.46	0.13	-0.13
YDR403W	YDR403W || DIT1 (1)	-0.61	0.07	0.68	0.95		0.4			-0.07	0.57	0.22	0.88
YDR404C	YDR404C || RPB7 (1)	0.05	-0.13	0.12	-0.03	-0.01	-0.01	-0.01	0.12	-0.05	-0.2	-0.22	0.04
YDR405W	YDR405W || MRP20 (1)	-0.38	-0.32	-0.67	-0.55	-0.16	-0.76	-0.47	-0.49	-0.03	-0.6	0.12	-0.37
YDR406W	YDR406W || PDR15 (1)	0.59	0.49	0.33	0.29	0.53	0.41	0.57	-0.18	-0.06	0.05	-0.16	0.35
YDR407C	YDR407C || TRS120 (1)		0.06	0.11	-0.21		0.17	0.14		-0.1	-0.2	-0.21	-0.16
YDR408C	YDR408C || ADE8 (1)	0.34	0.28	0.67	0.01	0.39	0.16	0.92	-0.29	-0.51	-0.17	-0.64	0.52
YDR409W	YDR409W || SIZ1 (1)			-0.21	-0.25					-0.21	-0.27	-0.45	-0.46
YDR410C	YDR410C || STE14 (1)	0.17	-0.21	0.37	-0.08	0.38	0.31	0.2	0.41	-0.31	-0.03	-0.27	0.26
YDR411C	YDR411C || DFM1 (1)	0.29	0.38	0.55	0.51	0.47	0.4	0.41	0	-0.13	0.16	-0.27	0
YDR412W	YDR412W || (1)	0.1	-0.02	0.2	0.19	-0.04	0.17	0.17	-0.05	0.21	-0.09	-0.61	-0.44
YDR413C	YDR413C || (1)	-0.75	-0.78	-0.57	-0.57	-0.74	-0.6	-0.61		0.2	-0.19	-0.43	-0.35
YDR414C	YDR414C || ERD1 (1)	-0.04	-0.23	0.12	0.13	0.13	0.21	-0.14	0.25	0.04	-0.4	-0.6	-0.12
YDR415C	YDR415C || (1)	-0.3	-0.46	-0.15	-0.37	-0.37	-0.23	-0.24	-0.37	-0.13	0	-0.18	-0.48
YDR416W	YDR416W || SYF1 (1)	-0.07	-0.12	-0.03	-0.12	-0.09	-0.04	-0.14	-0.27	-0.08	-0.12	-0.2	-0.04
YDR417C	YDR417C || (1)	-0.19	-0.11	-0.37	-0.01	-0.16	0.16	-0.04	-1.05	-0.8	-0.18	-0.43	1.34
YDR418W	YDR418W || RPL12B (1)	0.34	0.41	0.13	0.39	0.27	0.47	0.26	0.06	-0.06	0.24	0.14	0.54
YDR419W	YDR419W || RAD30 (1)	-0.03	-0.26	-0.08	-0.03	-0.37	-0.2	-0.16	0.05	0.12	-0.33	-0.45	-0.52
YDR420W	YDR420W || HKR1 (1)	0.47	0.21	0.28	0.32	0.53	0.23	0.39	0.12	-0.08	-0.04	0.4	-0.05
YDR421W	YDR421W || ARO80 (1)	-0.04	0.02	0.06	0.1	0.14	-0.21	0.05	0.06	0.12	0.26	0.05	-0.25
YDR422C	YDR422C || SIP1 (1)	0.1	0	0.24	0.02	0.01	-0.08	-0.11	-0.48	0.13	0.11	-0.07	0.6
YDR423C	YDR423C || CAD1 (1)	-0.24	-0.42	-0.12	-0.32	-0.08	-0.64	-0.5	-0.62	-0.13	0.01	-0.06	-0.39
YDR424C	YDR424C || DYN2 (1)	-0.06	0.19	0.2	0.12	-0.16	0.3	0.16	0	-0.33	-0.07	0.18	0.34
YDR425W	YDR425W || SNX41 (1)	-0.11	0.06	-0.16	-0.08	0.09	-0.11	-0.26	-0.09	-0.13	0.03	0.09	-0.11
YDR426C	YDR426C || (1)	-1.01		-1.37	-1.42			-1.18		-0.3
YDR427W	YDR427W || RPN9 (1)	0.24	0.38	0.42	0.35	0.2	0.47	0.29	0.3	-0.37	0.36	0.04	0.27
YDR428C	YDR428C || (1)	-0.03	-0.13	0.2	0.1	-0.32	-0.02	-0.09	0.28	-0.26	-0.26	-0.49	-0.17
YDR429C	YDR429C || TIF35 (1)	0.01	0.01	0.16	0.19	-0.02	0.11	0.08	0.22	0.21	0.07	-0.12	-0.16
YDR430C	YDR430C || CYM1 (1)	0.01	-0.21	-0.62	-0.36	-0.08	-0.49	0.05	-0.55	0.29	-0.02	0.1	-0.33
YDR431W	YDR431W || (1)									0.03	0.07	0.13	-0.11
YDR432W	YDR432W || NPL3 (1)	0	-0.04	-0.35	-0.04	0	-0.26	-0.17	-0.75	-0.48	-0.35	-0.88	0.24
YDR433W	YDR433W || (1)	0.01	0	-0.34	-0.17	0.03	-0.29	-0.2	-1.01	-0.29	-0.05	-0.41	0.42
YDR434W	YDR434W || GPI17 (1)	-0.04	-0.2	-0.05	0.1	-0.19	0.05	0.01	0.34	-0.05	0.34	0.01	-0.03
YDR435C	YDR435C || PPM1 (1)	0	0.18	0.36	-0.16	-0.08	-0.14	-0.23	0.34	0.24	0.41	0.66	0.01
YDR436W	YDR436W || PPZ2 (1)	-0.27	-0.11	-0.15	-0.2	-0.21	-0.31	-0.31	0.2	0.28	0.48	0.69	-0.18
YDR437W	YDR437W || (1)	0.42	-0.08	0.24	0.18	0.16	0.39	-0.1	0.42	0.27	0.13	-0.09	-0.42
YDR438W	YDR438W || (1)	0.37	0.26	0.62	0.42	0.39	0.47	0.39	0.14	0.13	0.13	0.14	-0.08
YDR439W	YDR439W || LRS4 (1)	0.17	0.08	0.01	-0.02	0.1	0.42	-0.07	-0.05	-0.08	-0.27	-0.36	0.19
YDR440W	YDR440W || DOT1 (1)	0.83	0.79	0.94	-0.3	0.35	0.69	0.83	-0.6	-0.11	-0.17	-0.41	0.02
YDR441C	YDR441C || APT2 (1)	-0.14	-0.03	-0.18	-0.08	-0.19	0.18	-0.06	0.5	-0.63	-0.53	-0.34	0.12
YDR442W	YDR442W || (1)		-1.49	-1.36	-1.33					0.07	0.32	0.67
YDR443C	YDR443C || SSN2 (1)	0.09	0.1	-0.27	0.16	0.01	-0.17	-0.15	0.1	0.14	-0.01	0.12	-0.26
YDR444W	YDR444W || (1)	0.23	0.05	0.33	-0.07	0.41	0.07	-0.07	-0.57	0.05	-0.41	-0.23	-0.13
YDR445C	YDR445C || (1)	-1.02	-0.87	-1.26	-1.36	-1.08	-1.04	-1.27	-1.04	0.24	-0.21	-0.44	-0.39
YDR446W	YDR446W || ECM11 (1)									0.38	0.55
YDR447C	YDR447C || RPS17B (1)	-0.38	-0.43	-0.51	-0.43	-0.69	-0.26	-0.33	-0.14	0.05	0.02	-0.33	-0.48
YDR448W	YDR448W || ADA2 (1)	1.04	0.9	0.95	0.7	1.05	0.95	0.92	-0.23	-0.01	0.37	-0.08	0.22
YDR449C	YDR449C || UTP6 (1)	0.24	-0.04	-0.05	0.1	0.1	0.41	0.03	-0.45	0.01	-0.35	-0.69	-0.21
YDR450W	YDR450W || RPS18A (1)	0.13	0.15	0.15	0.23	0.08	0.43	0.42	0.12	0.59	0.24	-0.06	0.39
YDR451C	YDR451C || YHP1 (1)	-0.12	-0.29	0.42	0.07	-0.08	-0.17	-0.16	-0.22	-0.38	-0.15	0.45	-0.07
YDR452W	YDR452W || PPN1 (1)	-0.37	-0.29	-0.35	-0.39	-0.4	-0.14	-0.42	0.21	0.03	0.06	0.14	-0.15
YDR453C	YDR453C || TSA2 (1)	0.02	0.53	0.58	0.16		0	0.57	0.33	-0.1	0.75	0.81	0.2
YDR454C	YDR454C || GUK1 (1)	0.3	0.27	0.41	0.36	0.36	0.43	0.56	0.02	-0.52	-0.49	-0.52	0.24
YDR455C	YDR455C || (1)	-0.89	-0.27	-0.84	-0.38			-0.38		0.07	0.43	0	-0.42
YDR456W	YDR456W || NHX1 (1)	-0.1	-0.4	-0.45	-0.23	-0.33	-0.24	-0.32	-0.6	-0.07	-0.04	-0.29	0.04
YDR457W	YDR457W || TOM1 (1)	-0.1	-0.11	-0.16	-0.37	0.07	-0.34	-0.31	-0.74	-0.28	-0.33	-0.06	-0.22
YDR458C	YDR458C || (1)	0.24	0.12	0.45	0.11	0.2	0.08	0.21	-0.29	0.18	0.11	-0.28	0.09
YDR459C	YDR459C || (1)	0.54	0.18	0.39	0.27	0.18	0.42	0.43	-0.33	-0.46	-0.36	-0.18	-0.05
YDR460W	YDR460W || TFB3 (1)	-0.05	-0.08	-0.01	0.01	-0.18	0.06	0.05	0.33	-0.37	-0.09	-0.15	-0.21
YDR461W	YDR461W || MFA1 (1)	-0.26	-0.82	-0.76	-1.09	-0.28	-0.02	-0.53	-1.15	-0.73	-0.78	2.88	-0.7
YDR462W	YDR462W || MRPL28 (1)	-0.32	-0.04	0.04	-0.15	-0.12	-0.28	0.03	-0.36	0.1	-0.1	0.16	-0.18
YDR463W	YDR463W || STP1 (1)	-0.09	-0.2	-0.06	0.01	-0.2	-0.21	-0.14	-0.46	0.21	0.12	0	0.1
YDR464W	YDR464W || SPP41 (1)	0.16	0.04	0.09	-0.08	-0.17	-0.38	-0.01	-0.36	-0.11	-0.32	-0.3	-0.61
YDR465C	YDR465C || RMT2 (1)	0.9	0.91	0.73	0.99	0.74	1.16	0.85	-0.01	0.33	0.18	-0.62	-0.14
YDR466W	YDR466W || PKH3 (1)	0.08	-0.01	-0.13	-0.08	0.09	-0.08	-0.19	-0.3	0.02	-0.18	-0.03	-0.17
YDR467C	YDR467C || (1)	-0.9	-0.8	-0.99	-0.99	-0.63	-0.9	-0.71		0.22	-0.27	0.16	0.41
YDR468C	YDR468C || TLG1 (1)	0.12	-0.06	0.1	-0.23		-0.05	-0.42	0.59	-0.18	0.23	0.25	-0.17
YDR469W	YDR469W || SDC1 (1)	0.34	0.39	0.64	-0.1	0.21	0.22	0.42	-0.03	-0.04	-0.16	-0.12	-0.19
YDR470C	YDR470C || UGO1 (1)	-0.62	-0.6	-0.77	-0.41		-0.54	-0.66	-0.65	0.21	0.15	0.14	0.13
YDR471W	YDR471W || RPL27B (1)	0.37	0.38	0.24	0.36	0.35	0.46	0.33	-0.08	-0.19	0.06	-0.09	0.29
YDR472W	YDR472W || TRS31 (1)	0.25	-0.07	0.11	0.15	-0.12	0.32	0.04	0.24	0.67	-0.05	-0.42	-0.19
YDR473C	YDR473C || PRP3 (1)	-0.04	-0.16	0.29	0.04	-0.08	0.11	-0.03	0.43	0.08	0.16	-0.19	-0.06
YDR474C	YDR474C || (1)	-0.01	0.04	-0.26	-0.5	-0.06	-0.8	-0.6	-0.95	-0.21	-0.11	0.15	-0.23
YDR475C	YDR475C || (1)	1.01	1.28	0.72	0.5	1.33	0.52	0.69	-0.82	-0.23	0.15	0.19	-0.26
YDR476C	YDR476C || (1)	-0.31	-0.21	-0.46	-0.29	-0.23	-0.55	-0.05	-0.14	0.01	0.48	-0.22	-0.59
YDR477W	YDR477W || SNF1 (1)	0.09	-0.06	-0.3	-0.42	-0.15	-0.71	-0.34	-0.78	-0.12	-0.09	-0.15	-0.39
YDR478W	YDR478W || SNM1 (1)			1.19			0.79		0.2	-0.26	-0.29	-0.35	0.2
YDR479C	YDR479C || PEX29 (1)	-0.01	0.21	-0.13	-0.22	-0.26	-0.17	-0.29	-0.58	0.05	0.44	0.49	-0.1
YDR480W	YDR480W || DIG2 (1)	-0.27	-0.29	-0.02	-0.22	-0.42	-0.32	-0.82	-0.02	-0.18	0.03	-0.25	-0.4
YDR481C	YDR481C || PHO8 (1)	-0.13	0.08	-0.05	-0.04	-0.33	-0.32	-0.27	-0.39	-1.23	-0.7	-0.81	-1.15
YDR482C	YDR482C || CWC21 (1)	0.24	-0.08	0.68	0.09	0.43	0.27	0.27	-0.14	-0.13	0.08	0.45	0.12
YDR483W	YDR483W || KRE2 (1)	-0.1	-0.03	0.12	-0.02	-0.12	0.01	0.07	0.24	-0.05	0.24	-0.02	0.14
YDR484W	YDR484W || VPS52 (1)	-0.25	-0.3	-0.24	-0.21	-0.48	-0.06	-0.17	-0.15	-0.1	-0.07	-0.09	-0.02
YDR485C	YDR485C || VPS72 (1)	0.12	-0.12	-0.23	-0.13	-0.04	-0.15	0.01	-0.21	0.08	-0.1	-0.09	-0.23
YDR486C	YDR486C || VPS60 (1)	-1.08	-0.57	-0.07	-0.41	-0.34		-0.68	0.37	0.09	0.27	0.51	-0.07
YDR487C	YDR487C || RIB3 (1)	-0.42	-0.51	-0.06	-0.48	-0.68	-0.51	-0.32	0.58	-0.07	-0.01	-0.15	-0.41
YDR488C	YDR488C || PAC11 (1)	0.62	0.85	0.2	0.4	0.68	0.39	0.47	-0.98	-0.07	-0.24	0.08	-0.52
YDR489W	YDR489W || SLD5 (1)		-0.41	-0.49	-0.48	-0.37	-0.67	-0.57	0.2	-0.16	-0.09	-0.01	0.08
YDR490C	YDR490C || PKH1 (1)	-0.63	-0.47	-0.54	-0.46	-0.61	-1.19	-0.63	-0.95	0.32	0.29	0.27	-0.12
YDR491C	YDR491C || (1)									-0.21	0.37	0.72
YDR492W	YDR492W || IZH1 (1)	0.18	0.01	0.08	0	0.23	0.37	-0.05	-0.11	-0.19	-0.33	-0.19	-0.61
YDR493W	YDR493W || (1)	-0.67	-0.58	-0.46	-0.45	-0.6	-0.4	-0.1	-0.36	0.45	-0.17	0.22	-0.11
YDR494W	YDR494W || RSM28 (1)	-0.01	-0.05	-0.13	-0.47	0.16	-0.15	0.09	-0.6	0.77	-0.36	0.03	-0.26
YDR495C	YDR495C || VPS3 (1)	0.12	-0.02	0.39	0.06	0.08	0.14	0.17	0	0.05	0.14	0.04	0.16
YDR496C	YDR496C || PUF6 (1)	0.26	0.13	0.19	0.39	0.01	0.42	0.38	0.03	-0.03	-0.46	-0.87	-0.26
YDR497C	YDR497C || ITR1 (1)	-0.03	-0.12	0.32	-0.38	0.33	-0.18	-0.05	0.12	-0.12	0.28	0.17	-0.33
YDR498C	YDR498C || SEC20 (1)	-0.04	0.01	-0.07	-0.17	-0.17	-0.22	-0.22	-0.14	-0.12	-0.2	-0.22	-0.24
YDR499W	YDR499W || LCD1 (1)	0.1	0.12	0.09	0.19	-0.04	0.14	0.08	-0.07	-0.15	-0.28	-0.27	0.06
YDR500C	YDR500C || RPL37B (1)	-0.46	-0.4	-0.64	-0.46	-0.37	-0.18	-0.39	0.23	0.15	0.04	0.13	0.23
YDR501W	YDR501W || PLM2 (1)	0.24	-0.04	-0.06	0.39	-0.08	-0.12	-0.08	-0.35	0.19	-0.35	-0.31	0.14
YDR502C	YDR502C || SAM2 (1)	-0.07	-0.4	0.04	-0.65	-0.16	-0.87	-0.77	-0.54	-0.77	-0.16	-0.23	-0.89
YDR503C	YDR503C || LPP1 (1)	0.41	0.22	-0.15	0.28	0.08	0.34	0.28	-0.02	0.19	0.14	0.33	0.28
YDR504C	YDR504C || SPG3 (1)	0.08	0.02	0.09	-0.28	0.29	0.23	-0.17	0.16	-0.17	0.13	0.15	0.94
YDR505C	YDR505C || PSP1 (1)	-0.02	-0.22	-0.03	-0.25	0.16	-0.14	0.11	0.39	-0.22	-0.34	0	0.38
YDR506C	YDR506C || (1)	0.4	0.29	0.23	0.06	0.45	0.22	0.34	-0.17	1.06	0.28	0.65	0.11
YDR507C	YDR507C || GIN4 (1)	0.44	0.21	0.49	0.48	0.35	0.48	0.36	0.18	-0.21	0.16	0.06	-0.36
YDR508C	YDR508C || GNP1 (1)	-0.53	-0.48	-0.69	-0.42	-0.52	-0.43	-0.6	-0.54	-0.02	-0.46	-0.04	-0.11
YDR509W	YDR509W || (1)	-0.23	-0.04	-0.28	0.07	0.07	-0.14	-0.18	-0.87	0.23	-0.21	-0.08	1.19
YDR510W	YDR510W || SMT3 (1)	-0.26	-0.21	-0.09	-0.12	-0.18	-0.27	-0.3	-0.7	-0.57	-0.75	-0.73	0.05
YDR511W	YDR511W || ACN9 (1)	-0.25	-0.24	-0.43	-0.42	-0.39	-0.57	-0.02	-0.9	0.17	-0.25	0.17	-0.08
YDR512C	YDR512C || EMI1 (1)	-0.74	-0.38	-0.48	-0.53	-0.76	-0.45	-0.44	0.22	0.49	-0.31	0.47	0.61
YDR513W	YDR513W || GRX2 (1)	0.04	0.65	-0.09	0.11	0.27	0	-0.14	-0.51	0.16	0.09	0.57	0.66
YDR514C	YDR514C || (1)	0.16	0.24	0.12	0.03	-0.03	-0.2	0	-0.12	-0.45	-0.1	-0.34	-0.18
YDR515W	YDR515W || SLF1 (1)	0.79	0.97	0.85	0.76	0.9	0.8	0.98	0.36	-0.05	-0.06	-0.11	1.69
YDR516C	YDR516C || EMI2 (1)	-0.26	-0.63	-1.08	-0.74	-0.34	-0.76	-0.78	-0.29	0.17	0.03	0.28	-0.59
YDR517W	YDR517W || GRH1 (1)	-0.5	-0.78	-0.52	-0.72	-0.87	-1.1	-0.93	-0.67	-0.04	-0.06	-0.06	-0.49
YDR518W	YDR518W || EUG1 (1)	0.14	-0.21	0.04	0.27	0	-0.04	0.3	0.18	-0.88	0.19	-0.08	-0.1
YDR519W	YDR519W || FPR2 (1)	0.45	0.68	0.85	0.9	0.54	0.81	1.06	0.47	-0.41	0.23	-0.24	0.54
YDR520C	YDR520C || (1)	0.1	0.01	0.18	-0.02	-0.01	-0.11	0.01	0.18	0.04	-0.24	-0.48	-0.14
YDR521W	YDR521W || (1)	0.06	0.19	0.05	0.04		0.41	0.22		-0.46	0.49	0.09	0.05
YDR522C	YDR522C || SPS2 (1)									0.24	1.29
YDR523C	YDR523C || SPS1 (1)						0.19			-0.19	0.44	0.15	0.04
YDR524C	YDR524C || AGE1 (1)	-0.25	-0.27	0.02	0.1	-0.16	-0.24	-0.19	0.84	-0.04	-0.44	-0.08	0.79
YDR525W	YDR525W || API2 (1)									0.06	-0.22	0.27	-0.16
YDR525W-A	YDR525W-A || SNA2 (1)	0.57	0.61	0.83	0.33	0.64	0.49	0.48	-0.55	-0.19	0.27	0.92	1.23
YDR526C	YDR526C || (1)	0.69	0.59	0.29	0.4	0.86	0.55	0.44	-1.11	-0.16	0.35	0.01	0.02
YDR527W	YDR527W || RBA50 (1)	-0.17	-0.52	-0.33	-0.15	-0.17	-0.21	-0.27	-0.17	-0.21	-0.37	-1.12	-0.67
YDR528W	YDR528W || HLR1 (1)	0.02	0.04	0.09	0.1	-0.06	-0.1	0	-0.5	-0.25	-0.54	-0.4	0.22
YDR529C	YDR529C || QCR7 (1)	0.3	0.18	-0.15	-0.01	0.21	0.1	0.27	-1.17	-0.29	-0.31	0.79	0.99
YDR530C	YDR530C || APA2 (1)	-0.32	-0.53	-0.04	-0.55	-0.32	-0.47	-0.64	0.11	-0.35	0.06	0.33	-0.56
YDR531W	YDR531W || (1)	-0.27	-0.25	-0.04	-0.37	-0.44	-0.24	-0.29	0.21	-0.26	-0.09	-0.37	-0.2
YDR532C	YDR532C || (1)	-0.17	-0.09	0.07	-0.15	-0.56	-0.21	-0.2	0.07	0.01	0.26	0.17	0.31
YDR533C	YDR533C || HSP31 (1)	0.1	0.42	0.4	0.26	1.51	0.2	0.71	0.67	0.76	0.18	0.79	1.49
YDR534C	YDR534C || FIT1 (1)	0.16	-0.13	-0.5	0.54	0.31	0.22	-0.27	-0.13	0.7	0.52	0.51	-0.06
YDR535C	YDR535C || (1)									1.34
YDR536W	YDR536W || STL1 (1)									0.42	1.23	1.89	0.41
YDR537C	YDR537C || (1)									-0.49	-0.25	-0.11	0
YDR538W	YDR538W || PAD1 (1)	0.17	0.18	0.27	0.07	0.34	-0.4	0.16	-0.28	-0.47	-0.33	-1.02	0.09
YDR539W	YDR539W || (1)	-0.18	-0.23	-0.38	-0.17	-0.06	-1.18	-0.03	-0.8	-0.45	0.25	-0.22	-0.39
YDR540C	YDR540C || (1)									-0.87	-0.53	0.13	0.01
YDR541C	YDR541C || (1)	-0.46	-0.06	-0.01	-0.44	-0.33	0.08	-0.05	0.39	-0.34	-0.29	-0.28	0.02
YDR542W	YDR542W || (1)	-0.16	-0.19	0.23	0.1	-0.13	-0.09	-0.76	0.05	-0.1	0.57	0.32	0.08
YDR543C	YDR543C || (1)	-0.13	-0.33	-0.12	-0.18	-0.14	-0.49	-0.46	-0.99	-0.2	-0.15	-0.29	0.08
YDR544C	YDR544C || (1)	0.38	0.04	-0.27		-0.14	0.02	-0.03		-0.02	-0.38		-0.28
YDR545W	YDR545W || YRF1-1 (1)	-0.17	-0.18	-0.62	-0.22	-0.24	-0.5	-0.37	0.92	0.12	-0.58	0.55	0.18
YEL001C	YEL001C || (1)	0.24	0.42	0.93	0.29	0.31	0.43	0.33	0.33	-0.31	0.12	-0.31	-0.05
YEL002C	YEL002C || WBP1 (1)	-0.56	-0.39	0.41	-0.38	-1.02	-0.02	-0.48	-0.01	-0.02	-0.05	-0.36	-0.37
YEL003W	YEL003W || GIM4 (1)	-0.02	-0.01	0.91	0.03	-0.16	0.16	0	-0.07	-0.46	-0.15	-0.2	0.54
YEL004W	YEL004W || YEA4 (1)	0.17	0.09	1	0.1	0.14	0.47	0.21	0.22	0.02	-0.26	-0.03	-0.06
YEL005C	YEL005C || VAB2 (1)	-0.21	-0.1	0.51	-0.26	-0.12	-0.16	-0.21	-0.06	0.25	-0.04	0.32	-0.13
YEL006W	YEL006W || (1)	0.19	-0.08	0.86	-0.14	-0.18	-0.06	0.19	-0.23	-0.3	-0.67	-0.57	-0.23
YEL007W	YEL007W || (1)	-0.02	-0.1	-0.2	-0.47	0	-0.4	-0.48	-0.99	-0.17	-0.56	-0.53	-0.04
YEL008W	YEL008W || (1)									0
YEL009C	YEL009C || GCN4 (1)	-0.28	-0.26	0.59	-0.58	-0.42	-0.24	-0.42	0.44	0.14	0.53	0.15	0.11
YEL010W	YEL010W || (1)												-0.14
YEL011W	YEL011W || GLC3 (1)	0.48	0.1	0.24	-0.64	0.41	-0.97	-0.68	-0.91	1.01	1.26	1.9	-0.06
YEL012W	YEL012W || UBC8 (1)	0.47	0.57	1.35	0.48		0.92	0.44	0.4	-0.13	0.64	0.86	0.42
YEL013W	YEL013W || VAC8 (1)	-0.15	0.02	0.44	-0.04	-0.13	-0.26	-0.14	0.31	-0.09	-0.11	-0.21	0.52
YEL014C	YEL014C || (1)	-0.45	-0.56	-0.19	-0.82		-0.12	-0.83
YEL015W	YEL015W || EDC3 (1)	0.03	-0.07	0.9	-0.21	-0.21	-0.09	-0.4	-0.23	-0.28	-0.8	-0.25	-0.37
YEL016C	YEL016C || (1)	0.38	0.11	1.22	0.1	0.4	0.23	-0.28	-0.23	0.17	-0.42	-0.18	-0.04
YEL017C-A	YEL017C-A || PMP2 (1)	0.27	0.56	1.41	0.37	0.38	0.48	0.54	-0.39	-0.44	-0.12	-0.84	0.54
YEL017W	YEL017W || GTT3 (1)	0.18	0.21	0.87	-0.19	0.07	-0.3	-0.24	-0.86	0.34	-0.3	-0.07	-0.12
YEL018W	YEL018W || EAF5 (1)	0.2	-0.19	1.04	0.19		-0.16	-0.64	-0.35	-0.19	-0.24	-0.28	0.04
YEL019C	YEL019C || MMS21 (1)								0.29	-0.5	-0.15	-0.27	-0.39
YEL020C	YEL020C || (1)	0.16	-0.26	0.63	-0.25	-0.14	-0.15	-0.14	-0.29	-0.33	-0.01	0.09	-0.57
YEL020W-A	YEL020W-A || TIM9 (1)	0.12	0.36	1.04	0.09	0.19	0.07	0.35	-0.12	0.06	-0.53	0.02	0.44
YEL021W	YEL021W || URA3 (1)	0.36	0.29	1.02	0.28	0.23	0.1	0.58	-0.11	-0.54	-0.27	-0.34	-0.23
YEL022W	YEL022W || GEA2 (1)	-0.47	-0.74	0.37	-0.56	-0.6	-0.52	-0.68	0.07	-0.21	0.06	-0.26	-0.36
YEL023C	YEL023C || (1)				-0.09					0.16	0.15	-0.05	-0.2
YEL024W	YEL024W || RIP1 (1)	-0.08	-0.31	0.46	-0.24	-0.14	-0.36	0.06	-1	0.92	-0.24	0.71	0.14
YEL025C	YEL025C || (1)	-0.23	-0.24	0.44	-0.12	-0.35	-0.2	-0.4	-0.28	0.04	-0.19	-0.05	-0.21
YEL026W	YEL026W || SNU13 (1)	0.3	0.42	0.41	0.33	0.48	0.25	0.36	-0.02	-0.66	-0.38	-0.45	0.17
YEL027W	YEL027W || CUP5 (1)	0.15	0.37	1.1	0.26	0.22	0.48	0.33	0.37	-0.18	-0.03	-0.17	0.36
YEL028W	YEL028W || (1)	-0.05	0.1	0.95	0.13	-0.06	-0.03	0.07	0.22	-0.39	-0.18	-0.23	0.1
YEL029C	YEL029C || BUD16 (1)	-0.25	-0.2	0.92	0	-0.32	-0.15	-0.09	0.42	-0.22	-0.45	-0.7	0
YEL030W	YEL030W || ECM10 (1)	0.09	-0.06	0.97	0.35		0.11	0.51	-0.17	-0.32	-0.66	-0.5	0.04
YEL031W	YEL031W || SPF1 (1)	-0.49	-0.17	0.44	-0.25	-0.2	-0.41	-0.3	-0.26	0.03	-0.15	-0.43	-0.41
YEL032W	YEL032W || MCM3 (1)	-0.21	-0.38	0.28	-0.49	-0.28	-0.51	-0.61	-0.22	-0.11	-0.28	0	-0.14
YEL033W	YEL033W || (1)	0.47	0.55	-0.51	0.34			-0.36		-0.27	-0.41	-0.35	1.34
YEL034W	YEL034W || HYP2 (1)	0.29	0.32	0.88	0.31	0.49	0.51	0.46	0.08	-0.32	-0.09	0.14	2.26
YEL035C	YEL035C || UTR5 (1)									0.35		0.11
YEL036C	YEL036C || ANP1 (1)	-0.1	-0.35	0.28	-0.08	-0.14	-0.12	-0.12	0.18	0.09	0.13	0.1	-0.13
YEL037C	YEL037C || RAD23 (1)	-0.11	-0.07	0.79	0.04	0	-0.15	-0.27	-0.05	0.2	0.17	-0.52	-0.57
YEL038W	YEL038W || UTR4 (1)	0.07	0.39	0.77	0.18	0.27	0.19	0.07	0.19	0.09	-0.29	-0.59	-0.14
YEL039C	YEL039C || CYC7 (1)	0.18	0.54	0.86	0.03	0.64	0.27	0.19	0.7	0.99	0.48	1.41	0.47
YEL040W	YEL040W || UTR2 (1)	0.09	0.13	1.19	-0.08	0.09	0.02	-0.04	0.4	-0.05	-0.27	0.14	0.18
YEL041W	YEL041W || (1)	-0.56	-0.31	0.42	-0.59	-0.21	-0.97	-0.41	-0.35	0.46	0.4	1	-0.35
YEL042W	YEL042W || GDA1 (1)	0.33	0.06	0.9	0.17	0.11	0.07	0	-0.35	0	-0.24	-0.44	-0.2
YEL043W	YEL043W || (1)	-0.04	-0.15	0.41	-0.25	-0.17	-0.22	-0.31	-0.72	-0.23	-0.28	-0.18	-0.26
YEL044W	YEL044W || IES6 (1)	-0.14	-0.38	0.68	-0.36	-0.4	-0.36	-0.39	0.08	-0.17	-0.25	-0.43	-0.03
YEL045C	YEL045C || (1)									0.16	-0.27	0.44	-0.13
YEL046C	YEL046C || GLY1 (1)	0.02	-0.45	0.5	-0.09	-0.25	-0.09	-0.22	0	0.24	0.15	-0.88	-0.01
YEL047C	YEL047C || (1)	-0.25	-0.58	0.77	-0.53	-0.38	-0.52	-0.23	0.41	-0.52	-0.33	-0.15	-0.4
YEL048C	YEL048C || (1)	0.31	0.15	1.12	0.19	0.33	0.34	0.64	0.13	-0.15	-0.57	-0.97	-0.59
YEL049W	YEL049W || PAU2 (1)	-0.12	-0.31	0.29	0.09	-0.12	-0.22	-0.5	0.19	0	0.46	0.18	0.02
YEL050C	YEL050C || RML2 (1)	-0.54	-0.91	-0.14	-0.95	-0.6	-1.06	-0.49	-0.26	0.6	-0.37	0.24	-0.57
YEL051W	YEL051W || VMA8 (1)	-0.21	-0.08	0.9	-0.11	-0.18	-0.04	-0.42	0.45	-0.1	-0.04	-0.07	-0.52
YEL052W	YEL052W || AFG1 (1)	0.27	0.07	0.82	0.21	0.22	0.08	0.17	-0.42	0.43	-0.03	0.35	0.14
YEL053C	YEL053C || MAK10 (1)	-0.08	-0.2	0.76	0.11	0.11	-0.06	-0.02	-0.15	-0.2	-0.07	-0.52	-0.5
YEL054C	YEL054C || RPL12A (1)	-0.02	-0.09	0.66	-0.05	0.04	0.13	0.16	0.25	-0.04	-0.31	-0.26	0.07
YEL055C	YEL055C || POL5 (1)	-0.3	-0.33	0.67	-0.27	-0.31	-0.32	-0.39	0.06	-0.33	-0.34	-0.76	-0.73
YEL056W	YEL056W || HAT2 (1)	-0.33	-0.53	0.56	-0.38	-0.47	-0.36	-0.43	-0.38	-0.14	-0.14	-0.18	-0.36
YEL057C	YEL057C || (1)			0.1				-0.9		0.35	0.3	0.57	0.55
YEL058W	YEL058W || PCM1 (1)	-0.22	-0.32	1.09	0.02	-0.04	-0.24	-0.1	1	-0.46	0.25	0.78	-0.22
YEL059C-A	YEL059C-A || SOM1 (1)	-0.88	-0.51	0.61	-0.47	-0.5	-0.68	-0.37	0.38	-0.05	-0.17	0.26	0.22
YEL059W	YEL059W || (1)									0.04	0.1	0.87	0.33
YEL060C	YEL060C || PRB1 (1)	1.01	0.77	1.67	0.96		0.51	0.45	0.33	0.28	1.55	1.32	1.34
YEL061C	YEL061C || CIN8 (1)	0.16	-0.11	0.78	-0.3	-0.24	-0.29	-0.45	-0.95	-0.21	-0.44	-0.65	0.41
YEL062W	YEL062W || NPR2 (1)	-0.49	-0.07	0.95	-0.16		-0.18	-0.05	0.41	-0.1	-0.01	0.03	1.01
YEL063C	YEL063C || CAN1 (1)	0.29	0.42	0.63	0.11	0.28	0.22	0.17	-0.44	-0.08	-0.46	-0.72	-0.06
YEL064C	YEL064C || AVT2 (1)	0.06	0.22	1.11	0.14	-0.06	0.12	-0.02	-0.14	-0.16	0.18	-0.17	0.32
YEL065W	YEL065W || SIT1 (1)	0.63	0.78	1.27	0.04	0.34	-0.37	1.37	-0.41	-0.22	3.14	0.63	0.83
YEL066W	YEL066W || HPA3 (1)	-0.43	-0.5	0.77	-0.27	-0.57	-0.56	-0.49	-0.19	0.17	-0.18	0.35	-0.42
YEL067C	YEL067C || (1)	0.3	0.27	0.97	-0.11	0.58	0.32	0.23	-0.18	-0.06	0.21	-0.14	-0.11
YEL068C	YEL068C || (1)	0.25	0.65	0.84			0.31	-0.22		-0.52	0.04	-0.19	-0.14
YEL070W	YEL070W || (1)	0.15	0.35	0.45	0.6	0.54	0.45	0.41	1.24	-0.45	1.63	3.38	-0.09
YEL071W	YEL071W || DLD3 (1)	-0.34	0.36	1.46	0.06	0.01	0.05	-0.09	0.22	-0.51	0.07	-0.33	-0.16
YEL072W	YEL072W || RMD6 (1)	0.49	0.43	1.37	0.5	0.21	0.19	0.25	0.38	-0.47	-0.16	-0.25	-0.11
YEL073C	YEL073C || (1)	0.66	0.09	1.6	0.18	0.34	-0.02		0.97	0.31	0.51	0.45	0.3
YEL074W	YEL074W || (1)	0.02	0.06	0.19	0.14	0.38	0.29	0.13	0.07	0.19	-0.77	-0.21	0.36
YEL075C	YEL075C || (1)	0.42	0.24	0.24	0.16	0.35	-0.25	-0.05	0.69	-0.01	-0.95	-0.12	-0.58
YEL075W-A	YEL075W-A || (1)	-0.26	-0.21	-0.35	-0.24	0.39	-0.13	-0.06	0.17	0.28	-0.8	-0.31	0.14
YEL076C	YEL076C || (1)		0.93	0.78	0.28		0.79	0.59		-0.06	-0.67	0.01	-0.64
YEL076C-A	YEL076C-A || (1)	0.38	0.65	0.53	0.38	0.85	0.08	0.14	-0.1	-0.23	-0.1	-0.04	-0.22
YEL077C	YEL077C || (1)	-0.49	-0.61	-0.93	-0.66	-0.41	-0.81	-0.84	0.31	0.43	-0.34	0.55	0.34
YER001W	YER001W || MNN1 (1)	-0.25	-0.59	0.96	-0.34	-0.33	-0.08	-0.58	-0.27	-0.14	-0.6	-0.25	-0.32
YER002W	YER002W || NOP16 (1)	0.22	0.18	1.02	0.41	0.23	0.4	0.22	0.45	-0.42	-0.04	-0.63	0.03
YER003C	YER003C || PMI40 (1)	-0.22	-0.42	0.71	-0.23	-0.18	-0.41	-0.26	-0.6	-0.09	-0.33	-0.08	-0.52
YER004W	YER004W || (1)	-0.05	0.16	0.82	-0.04	-0.01	-0.18	0.02	0.18	0.37	-0.17	0.14	0.36
YER005W	YER005W || YND1 (1)	-0.11	-0.48	0.72	-0.37	-0.36	-0.47	-0.42	-0.18	-0.24	-0.32	-0.34	0.12
YER006W	YER006W || NUG1 (1)	-0.61	-0.76	0.31	-0.49	-0.75	-0.75	-0.58	0.16	-0.12	-0.11	-0.46	-0.45
YER007C-A	YER007C-A || (1)	0.25	0.28	1.24	0.53	0.28	0.5	0.43	0.48	-0.11	-0.04	-0.32	0.19
YER007W	YER007W || PAC2 (1)	-0.51	-0.56	0.05	-0.76		0.05	-0.33		-0.07	-0.01	0	-0.05
YER008C	YER008C || SEC3 (1)	0.06	0.28	0.88	0.05	0.11	0.19	-0.29	-0.2	-0.01	0.08	0.06	0
YER009W	YER009W || NTF2 (1)	0.32	0.68	1.46	0.5	0.49	0.55	0.38	-0.26	-0.65	0.15	-0.19	0.44
YER010C	YER010C || (1)	0.02	0.35	1.15	0.15	0.12	0.26	0	-0.38	-0.16	0.06	0.01	0.3
YER011W	YER011W || TIR1 (1)	-0.45	-0.76	-0.01	0.47	-0.29	0.3	-0.35	0.29	-0.93	-0.24	0.32	0.75
YER012W	YER012W || PRE1 (1)	0.02	0.48	1.16	0.56	0.33	0.36	0.36	0.23	-0.3	0.13	-0.04	0.32
YER013W	YER013W || PRP22 (1)	0.89	0.52	1.54	0.78		1.06		-0.16	0.18	0.12	-0.34	-0.08
YER014C-A	YER014C-A || BUD25 (1)	-1.1	-1.38	-0.71	-1.41	-1.46	-1.35	-1.29
YER014W	YER014W || HEM14 (1)	-0.39	-0.53	0.45	-0.3	-0.35	-0.43	-0.4	-0.06	-0.34	0.21	0.26	-0.39
YER015W	YER015W || FAA2 (1)	-0.06	0.09	0.47	-0.42	-0.04	-0.36	-0.49	0.34	-0.66	-0.6	-0.39	0.02
YER016W	YER016W || BIM1 (1)	-0.35	-0.69	0.67	-0.45	-0.65	-0.61	-0.72	-0.19	-0.31	-0.52	-0.31	-0.54
YER017C	YER017C || AFG3 (1)	0.21	0.25	0.49	-0.12	0.44	-0.09	0.07	-0.68	0.25	-0.11	0.05	0.24
YER018C	YER018C || SPC25 (1)	-0.37	-0.6	0.39	-0.8	-0.57	-1.13	-0.81	-0.78	-0.43	-0.57	0.36	-0.76
YER019C-A	YER019C-A || SBH2 (1)	-0.49	-0.29	0.73	-0.4	-0.31	-0.21	-0.21	-0.17	0.09	-0.28	-0.04	0.19
YER019W	YER019W || ISC1 (1)	-0.2	-0.26	0.31	-0.48	-0.15	-0.38	-0.46	-0.29	-0.38	-0.74	-0.45	-0.64
YER020W	YER020W || GPA2 (1)	0.1	0.04	0.87	-0.21	0.03	-0.28	-0.12	-0.32	0.11	0.1	0.02	-0.34
YER021W	YER021W || RPN3 (1)	-0.04	0.22	0.81	-0.05	-0.07	0	0.13	-0.05	0.09	0.03	-0.02	-0.12
YER022W	YER022W || SRB4 (1)	-0.04	0.05	0.86	-0.23	-0.07	0.05	0.07	-0.43	-0.14	0.03	-0.21	-0.19
YER023W	YER023W || PRO3 (1)	-0.17	-0.12	0.74	-0.36	-0.33	-0.44	-0.41	0.15	-0.13	-0.19	-0.01	-0.52
YER024W	YER024W || YAT2 (1)	0.17	0.23	0.88	-0.01	0.02	-0.1	0.01	0.77	-0.09	0.13	1.25	0.13
YER025W	YER025W || GCD11 (1)	-0.02	-0.02	0.94	-0.05	-0.04	-0.08	0.02	-0.28	0.14	-0.27	-0.52	0.31
YER026C	YER026C || CHO1 (1)	-0.06	-0.19	1.38	-0.55	-0.12	0.14	0.22	0.42	0.41	0.74	0.04	0.05
YER027C	YER027C || GAL83 (1)	-0.27	-0.28	0.33	-0.41	-0.28	-0.38	-0.54	-0.17	-0.01	-0.38	-0.57	-0.34
YER028C	YER028C || MIG3 (1)	-0.1	0.38	1.61	0.04	-0.22	-0.14	0.2	-0.6	-1.21	-1.07	-1.03	-0.05
YER029C	YER029C || SMB1 (1)	-0.57	-0.66	0.37	-0.71	-0.95	-0.7	-0.77	-0.15	0.16	-0.18	-0.28	-0.27
YER030W	YER030W || (1)	-0.38	-0.21	0.52	-0.2	-0.32	-0.28	-0.25	0.43	0.21	0.09	0.36	0.03
YER031C	YER031C || YPT31 (1)	-0.28	-0.24	0.62	-0.18	-0.25	-0.08	-0.2	0.41	0.21	0.04	0.02	-0.07
YER032W	YER032W || FIR1 (1)	0.21	0.12	0.88	0.01	-0.04	0.01	-0.08	-0.63	-0.07	0.05	-0.05	0.19
YER033C	YER033C || ZRG8 (1)	-0.06	0.12	0.7	0.15	0.35	0.01	-0.12	-0.07	0.23	-0.01	0.18	-0.05
YER034W	YER034W || (1)	-0.14	0.04	1.45	0.1	0.21	-0.01	0	0.14	0.02	0.09	-0.14	0.11
YER035W	YER035W || EDC2 (1)	0.31	0.13	1.07	0.24	0.37	0.02	0.2	-0.06	0.14	-0.02	0.54	1.05
YER036C	YER036C || (1)	-0.42	-0.57	0.15	-0.29	-0.34	-0.39	-0.44	-0.02	0.13	-0.7	-0.92	-0.4
YER037W	YER037W || PHM8 (1)	-0.49	0.21	0.56	-0.13	-0.4	-0.75	-0.81	-0.19	-0.56	-0.89	0.16	-0.26
YER038C	YER038C || KRE29 (1)	0.01	0.18	0.71	-0.22			-0.78	0.57	0.3	-0.38	-0.59	0.05
YER039C	YER039C || HVG1 (1)	0.12	-0.02	0.49	-0.4	-0.08	0.08	-0.11	-0.45	0.24	0.02	0.52	0.06
YER039C-A	YER039C-A || (1)	0.02		0.43	-0.28	-0.62	-0.16	-0.2	-0.51	0.76	0.04	0.64	-0.13
YER040W	YER040W || GLN3 (1)	0.22	0.1	1.03	0.04	0.19	0.07	0.29	-0.17	0.25	-0.03	-0.54	0.05
YER041W	YER041W || YEN1 (1)	0.06	0.11	0.84	0	-0.08	0.13	-0.03	-0.14	0.02	-0.4	-0.48	-0.38
YER042W	YER042W || MXR1 (1)	0.34	0.11	1.1	0.74	0.16	0.34	-0.25	-1.51	-0.35	0.13	0.05	-0.42
YER043C	YER043C || SAH1 (1)	-0.2	-0.25	0.55	-0.11	-0.09	-0.51	-0.23	0.29	-0.16	-0.3	-0.31	-0.27
YER044C	YER044C || ERG28 (1)	0.43	0.48	1.92	0.31	0.71	0.57	0.52	0.81	-1.37	-0.45	-0.41	0.08
YER044C-A	YER044C-A || MEI4 (1)									-0.22	-0.52	0.06	0.14
YER045C	YER045C || ACA1 (1)	-0.08	0.07	0.73	0.2	0.1	-0.25	0.17	0.98	-1	0.46	0.64	0.26
YER046W	YER046W || SPO73 (1)	0.33	0.39	0.46	0.28	0.34	0.17	0.14	0.5	-0.28	0.44	0.54	0.65
YER047C	YER047C || SAP1 (1)	0.15	0.02	0.81	0.03	0.05	-0.16	-0.02	-0.38	0.15	-0.14	-0.15	-0.31
YER048C	YER048C || CAJ1 (1)	0.05	-0.02	0.99	0.13	-0.02	0.02	-0.04	0.29	0.09	-0.03	-0.11	-0.29
YER048W-A	YER048W-A || (1)	0.29	0.36	1.44	0.44	0.14	0.54	0.86	0.67	-0.28	0.11	0.23	0.76
YER049W	YER049W || (1)	0.48	0.43	1.24	0.57	0.37	0.58	0.67	0.26	-0.44	-0.15	-0.53	-0.47
YER050C	YER050C || RSM18 (1)	0.23	0.2	1.34	0.04	0.17	0.03	0.22	-0.63	0.11	0.06	0.38	0.44
YER051W	YER051W || (1)	0.04	-0.04	1.15	0.18	0	0.14	-0.01	-0.33	0.25	-0.04	0.02	-0.19
YER052C	YER052C || HOM3 (1)	-0.08	-0.2	1.06	-0.16	-0.1	-0.29	0.14	0.6	-0.66	0.31	-1.08	-0.69
YER053C	YER053C || PIC2 (1)	0.36	0.69	0.61	-0.03	0.54	-0.29	-0.41	-0.29	1.8	0.05	1.98	0.43
YER053C-A	YER053C-A || (1)	0.56	0.7	0.77	-0.05	0.52	0.85	-0.43	-1.05	1.54	0	0.92	1.47
YER054C	YER054C || GIP2 (1)	0.8	1.15	0.62	0.56		0.29	0.29	0.45	0.87	0.87	1.75	-0.21
YER055C	YER055C || HIS1 (1)	-0.24	-0.23	1.08	-0.46	-0.31	-0.88	-0.21	0.3	-1.35	0.1	-1.09	-0.9
YER056C	YER056C || FCY2 (1)	0.28	0.13	1.23	0.23	0.21	0.32	0.15	0.12	0.12	-0.48	-0.66	-1.35
YER056C-A	YER056C-A || RPL34A (1)	0.17	0.27	1.01	0.15	0.29	0.33	0.25	0.02	-0.18	0.4	0.34	0.69
YER057C	YER057C || HMF1 (1)	0.2	0.4	1.01	0.21	0.2	0.35	0.14	-0.49	-1.04	-0.1	-0.06	0.01
YER058W	YER058W || PET117 (1)	-0.1	0.18	0.31	-0.57	0.07	-0.63	0.14	-0.75	0.35	-0.06	0.56	-0.07
YER059W	YER059W || PCL6 (1)	0.44	0.26	1.19	0.23	0.09	-0.1	0.3	-0.28	-0.05	-0.22	-0.22	0.19
YER060W	YER060W || FCY21 (1)	0.37	-0.05	0.91	0.19	0.27	0.01	-0.02	0.36	-0.42	-1.02	-0.48	0.46
YER060W-A	YER060W-A || FCY22 (1)	0.77	0.64	1.04	0.27	0.41	0.88	-0.26	-0.57	-0.34	0	-0.19	-0.26
YER061C	YER061C || CEM1 (1)	0.26	-0.15	1.2	-0.06	0.16	-0.42	0.56	0.04	-0.35	-0.07	0.06	-0.34
YER062C	YER062C || HOR2 (1)	-0.88	-0.96	-0.12	-0.62	-1.03	-1.53	-0.78	0.05	0.09	-0.88	0.47	0.97
YER063W	YER063W || THO1 (1)	0.23	0.45	0.91	0.01	0.3	-0.36	0.04	-0.45	-0.03	-0.31	-0.07	-0.03
YER064C	YER064C || (1)	-0.3	-0.66	-0.04	-0.35	-0.66	-0.64	-0.69	-0.59	0.06	-0.14	-0.31	-0.12
YER065C	YER065C || ICL1 (1)	1.24	0.08	0.76	0	0.14	-0.11	-0.1	0.91	0.39	-0.5	2.37	0.06
YER066C-A	YER066C-A || (1)									0.05	0.23
YER066W	YER066W || (1)	0.28	0.54	1.27	0.42	0.41	0.44	0.38	0.53	-0.13	0.26	0.42	0.03
YER067W	YER067W || (1)	0.49	0.47	-0.41	-0.92	0.16	0.26	-0.38	1.05	-0.35	0.32	2.15	-0.76
YER068W	YER068W || MOT2 (1)	-0.11	-0.18	0.56	-0.04	0.12	-0.21	-0.11	-0.2	-0.06	-0.26	-0.3	-0.33
YER069W	YER069W || ARG5,6 (1)	-0.12	-0.4	0.2	-0.43	0.32	-0.7	-0.24	0.1	-1.39	-0.08	-1.58	0.41
YER070W	YER070W || RNR1 (1)	0.39	0.1	0.95	0.02	0.38	0.01	0.05	-0.78	-0.05	-0.1	-0.09	-0.28
YER071C	YER071C || (1)	-0.12	-0.15	1.18	0.11	0.08	0.21	0.38	-0.36	0	-0.35	-0.64	-0.14
YER072W	YER072W || VTC1 (1)	-0.07	0.08	0.95	-0.08	-0.34	-0.8	-0.3	-0.22	-1.82	-0.25	-0.4	-0.41
YER073W	YER073W || ALD5 (1)	0.67	0.41	1.57	0.68	0.53	0.67	0.84	-0.03	-0.39	0.5	-1.38	0.44
YER074W	YER074W || RPS24A (1)	-0.31	-0.21	0.72	-0.17	-0.28	-0.06	-0.21	0.15	-0.06	0.2	0.27	0.33
YER074W-A	YER074W-A || YOS1 (1)	0.21	0.5	1	-0.15	0.17	0.23	0.18	0.56	-0.24	0.04	0.04	0.72
YER075C	YER075C || PTP3 (1)	0.23	-0.11	1.04	0.08	0.1	0.2	0.13	-0.08	-0.13	-0.24	-0.34	-0.3
YER076C	YER076C || (1)	0.06	0.07	0.82	0.02	0	0	-0.09	-0.21	-0.24	-0.14	-0.31	-0.28
YER077C	YER077C || (1)	0.21	-0.19	0.88	0.29	-0.02	0.15	0.45	0.94	-0.33	-0.2	0.42	-0.08
YER078C	YER078C || (1)	0.56	0.36	1.13	0.25	0.32	0.29	0.45	-0.39	0.02	-0.28	-0.12	0.03
YER079W	YER079W || (1)	0.33	0.5	1.02	0.24	0.61	0.15	0.42	-0.36	0.28	0.63	0.91	0.19
YER080W	YER080W || (1)	-0.14	-0.18	0.69	-0.28	-0.09	-0.04	-0.2	-0.27	-0.19	0.04	0.07	0.15
YER081W	YER081W || SER3 (1)	-0.15	0.76	1.19	0.03	-0.23	-0.36	0.16	1.06	0.31	0.87	-0.31	-0.54
YER082C	YER082C || UTP7 (1)	0.08	-0.21	0.79	0.03	0.02	0.01	-0.08	-0.26	-0.14	-0.05	-0.41	-0.39
YER083C	YER083C || RMD7 (1)	0.24	0.33	1.47	0.09	0.26	0.13	0.14	-0.1	-0.13	0.52	0.15	-0.04
YER084W	YER084W || (1)	-0.5	-0.69	-0.86	-0.91	-0.33	-0.52	-0.48		0.27
YER085C	YER085C || (1)									0.07	0.73	0.16	-0.14
YER086W	YER086W || ILV1 (1)	-0.11	-0.3	0.33	-0.46	-0.33	-0.56	-0.35	-0.39	-0.36	-0.24	-0.7	-0.38
YER087C-B	YER087C-B || SBH1 (1)	0.45	0.48	1.39	0.56	0.48	0.53	0.5	0.49	-0.1	0.05	-0.07	0.54
YER087W	YER087W || (1)	-0.43	-0.32	0.73	-0.48	-0.22	0.14	-0.39	-0.45	0.1	-0.1	0.51	-0.14
YER088C	YER088C || DOT6 (1)	0.4	0.51	1	0.02	0.63	0.17	0.17	-0.88	-0.33	-0.33	-0.3	0.29
YER089C	YER089C || PTC2 (1)	0.02	-0.05	0.86	-0.22	-0.14	-0.27	-0.23	-0.57	-0.19	-0.6	-0.95	-0.81
YER090W	YER090W || TRP2 (1)	0.03	-0.19	0.98	0.05	-0.04	0	0.04	0.42	-0.22	0.33	-0.31	-0.04
YER091C	YER091C || MET6 (1)	-0.11	-0.89	0.02	-0.54	0.1	-0.89	-0.8	0.1	-0.87	-0.39	-0.31	-0.4
YER091C-A	YER091C-A || (1)									0.18	0.36	0.03
YER092W	YER092W || IES5 (1)	-0.36	-0.28	1.15	-0.27	-0.43	-0.1	-0.12	0.38	0.15	-0.02	0.29	-0.53
YER093C	YER093C || TSC11 (1)	-0.54	-0.45	0.39	-0.5	-0.76	-0.6	-0.49	-0.29	0.14	-0.08	-0.14	-0.41
YER093C-A	YER093C-A || (1)	0.07	0.13	1.05	-0.11	0.24	-0.07	0.42	-0.96	0.29	0	0.39	0.08
YER094C	YER094C || PUP3 (1)	0.08	0.28	1.09	0.22	0.22	0.18	0.16	-0.05	0	0.17	0.2	0.38
YER095W	YER095W || RAD51 (1)	0.35	0.19	1	0.31	0.14	0.19	0.24	0.22	0.61	-0.29	0.6	0.04
YER096W	YER096W || SHC1 (1)	-0.06	0.26	0.11	-0.12	-0.26	0.25	0.32	0.25	1.47	0.1	0.71	-0.25
YER097W	YER097W || (1)		1.28	0.8						-0.66	0.03	-0.5	-0.24
YER098W	YER098W || UBP9 (1)	-0.28	-0.12	0.67	-0.26					-0.06	0.06	0.78	0.54
YER099C	YER099C || PRS2 (1)	0.6	0.6	1.72	0.6	0.45	0.68	0.62	0.11	-0.13	0.01	-0.15	-0.34
YER100W	YER100W || UBC6 (1)	-0.39	-0.53	0.51	-0.31	-0.64	-0.49	-0.57	0.36	-0.27	-0.09	-0.44	-0.23
YER101C	YER101C || AST2 (1)	0.06	0.43	1.24	0.41					0.06	0.2	0.38	-0.41
YER102W	YER102W || RPS8B (1)	0.45	0.42	1.2	0.42	0.41	0.55	0.55	-0.01	0.07	0.04	-0.32	0.65
YER103W	YER103W || SSA4 (1)	0.46	0.23	1.28	1.36	1.18	1.36	0.62	-0.13	-0.35	0.93	0.09	0.07
YER104W	YER104W || RTT105 (1)	0.01	-0.27	1.1	0.3		-0.14	0.15		0.03	0.22	-0.11	-0.1
YER105C	YER105C || NUP157 (1)	0.09	0.06	0.97	-0.15	0.09	-0.21	-0.11	-0.38	0.06	-0.06	-0.27	-0.13
YER106W	YER106W || MAM1 (1)	0.16	0.06	0.99	0.08	0.24	-0.34	0.14	-0.53	0.39	0.39	-0.12	0.06
YER107C	YER107C || GLE2 (1)	0.09	-0.03	0.9	0.02	0.36	0.25	0.14	-0.25	-0.03	-0.24	-0.59	-0.38
YER109C	YER109C || FLO8 (1)	0.15	-0.12	1.01	0.42	0.22	0.11	0.16	0.16	0.04	0.12	-0.26	-0.21
YER110C	YER110C || KAP123 (1)	-0.57	-0.38	0.28	0.12	-0.25	-0.1	-0.33	0.17	-0.34	-0.38	-0.76	-0.22
YER111C	YER111C || SWI4 (1)	0.6	0.62	1.54	0.87	0.9	0.68		0.55	-0.57	-0.21	0.05	1.42
YER112W	YER112W || LSM4 (1)	0.33	0.47	1	0.58	0.3	0.39	0.21	0.05	-0.24	0.04	-0.3	0.26
YER113C	YER113C || (1)	0.18	-0.03	0.86	-0.04	-0.08	0.15	0.06	-0.44	-0.22	-0.28	-0.38	-0.02
YER114C	YER114C || BOI2 (1)	-0.12	-0.42	0.67	-0.16	-0.42	-0.64	-0.49	-0.91	-0.49	-0.28	-0.45	-0.68
YER115C	YER115C || SPR6 (1)	0.29	0.09	0.6	-0.19	0.13	-0.05	0.03	-0.29	-0.53	-0.8	-0.68	-0.43
YER116C	YER116C || SLX8 (1)	0.48	0.35	0.99	0.33		0.24			-0.21	0.23	0.23	0.31
YER117W	YER117W || RPL23B (1)	0.3	0.52	1.26	0.48	0.53	0.72	0.72	-0.16	-0.48	0.06	-0.34	-0.1
YER118C	YER118C || SHO1 (1)	0.23	0	0.99	0.19	0.21	0.29	0.3	0.23	-0.1	0.15	0.07	0.04
YER119C	YER119C || AVT6 (1)	-0.26	-0.37	0.84	-0.64	-0.35	-0.39	-0.63	-0.58	0.05	-0.37	0.16	-0.43
YER120W	YER120W || SCS2 (1)	-0.21	-0.3	0.54	-0.67	-0.27	-0.65	-0.71	-1.05	0.12	-0.19	-0.04	-0.42
YER121W	YER121W || (1)									0.11	0.8	1.74	0.19
YER122C	YER122C || GLO3 (1)	-0.07	-0.81	0.77	-0.15					-0.38	-0.23	-0.23	1.17
YER123W	YER123W || YCK3 (1)	0.72	0.52	1.31	0.57	0.57	0.79	0.63	0.11	0.71	-0.17	-0.32	1.41
YER124C	YER124C || DSE1 (1)	0.44	0.28	1.19	-0.01	0.58	0.45	0.43	0.33	0.4	-0.92	0.01	1.74
YER125W	YER125W || RSP5 (1)	1.12	1.1	1.87	1.02	1.2	0.85	1.07	0.13	0.13	-0.25	-0.13	2
YER126C	YER126C || NSA2 (1)	-0.18	-0.3	0.89	0	-0.41	-0.06	0.15	0.35	-0.02	-0.34	-0.6	0.61
YER127W	YER127W || LCP5 (1)	0.05	-0.05	0.81	0.14	0.19	0.17	-0.72	-0.03	0.05	-0.3	-0.69	-0.56
YER128W	YER128W || (1)	-0.6	-0.61	0.35	-0.61			-0.85	-0.6	-0.27	-0.21	-0.07	0.06
YER129W	YER129W || (1)	0.23	-0.19	0.67	-0.02	0.25	-0.15	-0.07	-0.25	0.15	-0.25	-0.3	-0.3
YER130C	YER130C || (1)	-0.24	-0.35	0.9	0.03	-0.05	-0.39	-0.2	0.6	-0.08	0.35	0.09	-0.25
YER131W	YER131W || RPS26B (1)	-0.17	-0.24	0.57	-0.28	-0.26	-0.1	-0.12	-0.27	0.29	-0.08	-0.07	-0.18
YER132C	YER132C || PMD1 (1)	-0.16	-0.21	0.6	-0.06	-0.19	-0.3	-0.15	0.32	-0.07	-0.03	0.21	0.2
YER133W	YER133W || GLC7 (1)	0.47	0.56	1.58	0.83	0.55	0.68	0.71	0.25	0.03	-0.1	-0.16	0.4
YER134C	YER134C || (1)	-0.03	0.01	1.21	-0.19	0.15	-0.05	-0.11	-0.29	-0.22	-0.06	0.22	-0.03
YER135C	YER135C || (1)									0.35
YER136W	YER136W || GDI1 (1)	0	-0.14	1.05	0.06	-0.05	0.12	-0.01	0.34	-0.18	0.13	-0.28	1.42
YER137C	YER137C || (1)	-0.04	0	0.82	0.09	0.23	0.34	0.01	0.35	-0.05	0.02	-0.44	-0.55
YER138W-A	YER138W-A || (1)	-0.07	-0.65	0.01	0.25	-0.1	0.43	0.36	0.36	-0.83	0.59	0.08	-0.87
YER139C	YER139C || (1)			0.34						-0.09	0.32	0.26	-0.35
YER140W	YER140W || (1)	0.03	-0.11	1.13	0.06	-0.08	0.02	-0.03	-0.38	-0.12	-0.31	-0.55	-0.18
YER141W	YER141W || COX15 (1)	-0.08	-0.2	0.8	-0.63	-0.22	-0.4	-0.27	-0.36	0.35	-0.13	0.07	0.56
YER142C	YER142C || MAG1 (1)	0.48	1.22	1.46	0.94	1.03	0.83	0.95	0.87	0.37	0.79	0.68	0.29
YER143W	YER143W || DDI1 (1)	-0.09	-0.36	0.33	-0.31	-0.04	-0.26	-0.25	-0.57	-0.03	0.45	0.28	-0.29
YER144C	YER144C || UBP5 (1)	0.17	0.22	1.1	0.47	0.33	0.24	0.03	0.14	-0.15	0.25	0.35	0.18
YER145C	YER145C || FTR1 (1)	0.09	0.12	0.76	-0.4	-0.25	-0.2	0.14	-0.52	-0.18	1.27	-0.02	0.31
YER146W	YER146W || LSM5 (1)	0.14	0.19	1.18	0.24		0.19	0.16	-0.33	-0.07	-0.29	-0.47	0.72
YER147C	YER147C || SCC4 (1)	-0.38	-0.38	0.52	-0.33	-0.35	-0.6	-0.48	0.08	-0.23	-0.24	-0.36	-0.57
YER148W	YER148W || SPT15 (1)	0.38	0.22	1.06	0.21	0.1	0.22	0.27	-0.15	-0.15	-0.34	-0.51	-0.11
YER149C	YER149C || PEA2 (1)	0.23	0.31	0.96	0.09	0.19	0.14	-0.21	0.14	-0.02	-0.23	-0.4	-0.16
YER150W	YER150W || SPI1 (1)	-0.23	-0.44	0.69	1.03	0.77	1.09	0.08	-0.48	0.84	0.65	0.31	-0.24
YER151C	YER151C || UBP3 (1)	-0.04	-0.06	0.42	0.15	0.13	-0.2	0.08	-0.4	-0.32	0.03	-0.49	-0.21
YER152C	YER152C || (1)	-0.1	-0.26	0.96	-0.2	-0.28	-0.36	-0.33	-0.63	-0.65	-0.35	-0.03	-0.9
YER153C	YER153C || PET122 (1)	-0.46	-0.37	-0.53	-0.46	-0.44	-0.36	0.02	-0.23	-0.21	-0.13	-0.26	-0.56
YER154W	YER154W || OXA1 (1)	0.14	0.12	0.64	-0.12	0.2	-0.13	0.09	-0.85	-0.1	-0.09	0.07	-0.19
YER155C	YER155C || BEM2 (1)	-0.16	-0.34	0.67	-0.28	-0.19	-0.02	-0.16	0.06	-0.28	-0.38	0	-0.38
YER156C	YER156C || (1)	-0.23	-0.14	0.81	-0.17	-0.16	-0.46	-0.35	-0.58	-0.24	-0.57	-0.76	-0.4
YER157W	YER157W || COG3 (1)	0.45	0.07	1.19	0.23	0.34	0.25	0.25	0.01	-0.17	0.09	-0.25	0.34
YER158C	YER158C || (1)	-0.02	0.16	0.77	0.26	0.14	-0.35	-0.14	0.08	0.09	0.31	0.64	0.16
YER159C	YER159C || BUR6 (1)	-0.51	-0.32	0.61	-0.32	-0.48	-0.3	-0.5	0.48	-0.62	0.29	0	-0.22
YER161C	YER161C || SPT2 (1)	0.33	0.35	1.65	0.5	0.23	0.34	0.62	0.45	-0.04	0.1	-0.42	-0.31
YER162C	YER162C || RAD4 (1)	0.02	0.25	1.05	-0.14		-0.06	-0.38	0.09	-0.09	-0.04	0.32	-0.18
YER163C	YER163C || (1)	0.2	0.46	1.23	0.38	0.51	0.33	0.62	0.63	-0.29	0.1	0.47	0.1
YER164W	YER164W || CHD1 (1)	0.01	-0.33	0.26	-0.03	-0.26	-0.07	-0.35	-0.46	-0.11	-0.39	-0.44	-0.2
YER165W	YER165W || PAB1 (1)	-0.68	-0.67	-0.15	-0.66	-0.68	-1.05	-0.83	-0.11	0.15	-0.69	-0.46	0.03
YER166W	YER166W || DNF1 (1)	-0.09	-0.35	0.29	-0.14	-0.17	-0.25	0.06	-0.13	-0.08	-0.51	-0.27	-0.07
YER167W	YER167W || BCK2 (1)	-0.06	-0.18	0.38	-0.2	-0.02	-0.28	-0.09	0.33	-0.34	-0.13	-0.09	0.01
YER168C	YER168C || CCA1 (1)	-0.2	-0.22	0.77	-0.08	-0.33	-0.21	-0.47	-0.26	-0.44	0	-0.4	-0.15
YER169W	YER169W || RPH1 (1)	-0.32	-0.27	0.53	-0.22	-0.25	-0.41	-0.31	-0.35	0.19	-0.03	0.03	-0.15
YER170W	YER170W || ADK2 (1)	0.29	0.12	0.95	-0.24	0.04	0.01	-0.1	-0.89	-0.07	-0.17	-0.11	0.14
YER171W	YER171W || RAD3 (1)	-0.44	-0.37	0.66	-0.08	-0.56	-0.34	-0.14	0.25	-0.22	-0.01	-0.25	-0.22
YER172C	YER172C || BRR2 (1)	0.16	-0.03	0.98	0.12	0.19	0.07	0.1	-0.31	0.06	-0.01	-0.14	-0.27
YER173W	YER173W || RAD24 (1)	-0.09	0.01	0.82	-0.1	-0.28	-0.14	-0.22	-0.12	-0.03	-0.03	-0.41	-0.17
YER174C	YER174C || GRX4 (1)	-0.43	-0.41	0.43	-0.51	-0.44	-0.39	-0.5	-1.1	-0.07	-0.45	-0.52	0.04
YER175C	YER175C || TMT1 (1)	0.03	-0.06	1.14	-0.14	0.33	-0.46	0.29	0.42	0.11	1.13	0.31	-0.02
YER176W	YER176W || ECM32 (1)	1.46	0.04	0.78	0.08	0.12	0.12	0	-0.09	-0.17	0.07	-0.68	-0.2
YER177W	YER177W || BMH1 (1)	-0.25	-0.35	0.42	-0.23	-0.21	-0.28	-0.37	-0.31	0.24	0.13	0.21	-0.22
YER178W	YER178W || PDA1 (1)	-0.64	-0.73	0.42	-0.79	-0.77	-0.81	-0.67	-0.39	0.49	0.05	0.22	-0.73
YER179W	YER179W || DMC1 (1)									0.23	0.69	0.88	-0.11
YER180C	YER180C || ISC10 (1)	-0.51	-0.5	0.54	-0.66	-0.41	-0.5	-0.48	-0.17	-0.44	-0.19	-0.59	-0.33
YER182W	YER182W || (1)	0.2	0.32	0.99	-0.04	0.28	0.07	0.41	-0.59	0.87	0.03	0.63	0.62
YER183C	YER183C || FAU1 (1)	-0.03	0.04	1.21	0.09	-0.23	0.08	-0.16	-0.17	-0.3	-0.4	-0.28	-0.1
YER184C	YER184C || (1)	-0.06	0.08	0.75	0.03	0.08	-0.32	-0.03	0.76	0.02	0.83	0.27	-0.27
YER185W	YER185W || (1)	0.53	0.84	1.47	0.83	1.25	0.86	1.04	1.17	-0.12	2.62	1.03	0.68
YER186C	YER186C || (1)	0.02	0.01	0.85	-0.19	-0.26	0.15	0.12	-0.13	-0.44	-0.5	-0.57	-0.26
YER186W-A	YER186W-A || (1)									0.69	-0.41	-0.47	0.73
YER187W	YER187W || (1)	0.17	0.27	1.23	0.53					0.45	-0.08	-0.07	0.71
YER188W	YER188W || (1)	0.26	-0.86	1.61	-0.13	-0.56	-0.01	-0.78	-0.12	-0.31	-0.44	0.4	0.42
YER189W	YER189W || (1)	0.3	0.44	0.18	0.06	0.37	0.17	-0.39	0.32	-0.04	-0.95	-0.12	-0.61
YER190W	YER190W || YRF1-2 (1)	-0.1	-0.24	-0.61	-0.29	-0.15	-0.45	-0.51	0.78	0.25	-0.01	0.57	0.22
YFL001W	YFL001W || DEG1 (1)	0.2	0.18	0.17	0.02	0.21	0.13	0.11	-0.6	-0.23	-0.21	-0.38	0.19
YFL002C	YFL002C || SPB4 (1)	0.48	0.36	0.29	0.75		-0.03	0.69		-0.35	-0.39	-0.36	-0.17
YFL003C	YFL003C || MSH4 (1)								0.63	0.15	0.07	-0.71	0.73
YFL004W	YFL004W || VTC2 (1)	-0.11	-0.08	-0.06	-0.29	-0.49	-0.73	-0.54	0.29	-1	-0.31	-0.93	-0.97
YFL005W	YFL005W || SEC4 (1)	0.07	0.12	0.29	0.11	-0.04	0.19	0.13	0.28	0.03	-0.09	-0.02	0.38
YFL006W	YFL006W || (1)		0.38	-0.18	0.85				-0.68	0.04	-0.25	-0.44	-0.3
YFL007W	YFL007W || BLM3 (1)	0.54	0.42	-0.03	0.65	0.5	0.69	0.8	-1.23	0.84	0	-0.22	0.39
YFL008W	YFL008W || SMC1 (1)	-0.22	-0.37	-0.31	-0.3	-0.2	-0.34	-0.2	-0.17	-0.23	-0.38	-0.27	-0.36
YFL009W	YFL009W || CDC4 (1)	-0.3	-0.54	-0.33	-0.32	-0.13	-0.28	-0.47	0.21	-0.2	-0.26	-0.29	-0.28
YFL010C	YFL010C || WWM1 (1)	-0.49	-0.4	-0.74	-0.71	-0.33	-0.72	-0.77	-0.53	-0.33	-0.32	0.08	-0.63
YFL010W-A	YFL010W-A || AUA1 (1)	-0.93	-0.76	-1.04	-0.92	-0.72	-1.02	-1.04		-0.74	-0.23	-0.26	-0.08
YFL011W	YFL011W || HXT10 (1)	-0.21	-0.23	-0.28	-0.19	0.9	-0.27	-0.38	0.8	-0.03	1.55	1.45	0.17
YFL012W	YFL012W || (1)					-0.48				0.68	0	-0.5	1.03
YFL012W-A	YFL012W-A || (1)									-0.38	-0.48
YFL013C	YFL013C || IES1 (1)	-0.06	-0.17	-0.33	0.01		-0.51	-0.63		-0.27	-0.07	-0.22	0.68
YFL014W	YFL014W || HSP12 (1)	1.31	3.33	-1	0.55	1.33	1.33	0.95	1.6	3.74	2.05	4.6	0.28
YFL015C	YFL015C || (1)									0.12	0.63	1.81
YFL016C	YFL016C || MDJ1 (1)	0.32	0.53	0.44	-0.01	0.45	0.21	0.42	-0.73	0.03	0	0.5	0.08
YFL017C	YFL017C || GNA1 (1)	0.04	-0.12	-0.24	-0.11	-0.19	0.17	-0.07	-0.24	-0.27	-0.15	-0.22	-0.02
YFL017W-A	YFL017W-A || SMX2 (1)	-0.26	0.11	-0.1	-0.04	-0.24	-0.05	-0.23	-0.03	0.08	0.03	-0.01	0.47
YFL018C	YFL018C || LPD1 (1)	-0.06	-0.11	-0.08	-0.17	0.09	-0.19	-0.1	-0.24	-0.17	0.22	0.33	-0.68
YFL019C	YFL019C || (1)	-0.17	-0.43	-0.45	0.06		-0.04	-0.37		0.14	-0.19	-0.2	-0.17
YFL020C	YFL020C || PAU5 (1)	0.42	0.29	0.23	0.06	0.32	0.09	-0.2	0.51	-0.02	0.56	0.54	0.23
YFL021W	YFL021W || GAT1 (1)	-0.07	-0.11	0.04	-0.56	-0.12	-0.44	-0.48	-0.73	-0.89	-0.91	-0.79	-1.03
YFL022C	YFL022C || FRS2 (1)	-0.45	-0.58	-0.55	-0.48	-0.43	-0.54	-0.74	-0.67	-0.65	-0.41	-0.86	-0.47
YFL023W	YFL023W || BUD27 (1)	-0.23	-0.38	-0.36	0.19	-0.59	-0.06	-0.43	-0.31	-0.08	0.08	-0.76	-0.77
YFL024C	YFL024C || EPL1 (1)	0.3	0.21	0.26	0.2	0.25	0.21	0.11	-0.28	0.04	0.13	-0.28	0.31
YFL025C	YFL025C || BST1 (1)	-0.07	-0.49	-0.18	-0.26	-0.49	-0.12	-0.29	-0.16	-0.22	-0.12	-0.18	0.32
YFL026W	YFL026W || STE2 (1)	-0.17	-0.88	-0.33	-1.36	-0.24	-0.07	-0.61	-0.35	-0.49	-0.66	0.79	-0.43
YFL027C	YFL027C || GYP8 (1)	0	0	0.13	-0.19	0.01	0.04	0.01	-0.1	-0.74	-0.52	0	-0.02
YFL028C	YFL028C || CAF16 (1)	-0.04	0.25	0.26	0.13	0.19	0.25	0.2	0.31	-0.53	0.08	-0.13	0.31
YFL029C	YFL029C || CAK1 (1)	0.12	0.06	0.2	0.08	0	0.2	0.2	0.02	-0.31	0.06	0.09	0.14
YFL030W	YFL030W || AGX1 (1)	0.4	0.72	-0.01	0.1	0.31	-0.01	0.58	-0.17	0.66	0.54	2.33	0.26
YFL031W	YFL031W || HAC1 (1)	0.93	1.12	0.66	0.7	0.92	0.63	1.13	0.01	0.15	-0.21	-0.77	1.71
YFL032W	YFL032W || (1)	-0.49	-0.3	-0.49			-0.2	-0.39		0.04	0.02	-0.21	-0.45
YFL033C	YFL033C || RIM15 (1)	0.25	0.13	0.21	0.38	0.18	0.24	0.38	1.93	-0.13	0.37	1.13	0.45
YFL034C-A	YFL034C-A || RPL22B (1)	0.33	0.26	0.44	0.18	0.33	0.39	0.32	-1.32	-0.75	-0.38	-0.36	0.17
YFL034C-B	YFL034C-B || MOB2 (1)	0.34	0.36	0.2	0.29	0.41	0.24	0.18	-0.3	-0.06	0.01	-0.2	0.01
YFL034W	YFL034W || (1)	-0.06	-0.17	-0.5	-0.18	-0.3	-0.05	-0.14	-0.48	-0.26	-0.15	-0.51	-0.51
YFL036W	YFL036W || RPO41 (1)	0.57	0.37	0.25	0.12	0.64	0.08	0.72	-0.38	0.49	-0.1	0.37	0.08
YFL037W	YFL037W || TUB2 (1)	0.23	0.38	0.21	0.19	0.26	0.14	0.01	-0.28	0.22	-0.08	-0.05	0.18
YFL038C	YFL038C || YPT1 (1)	-0.39	-0.29	-0.57	-0.36	-0.55	-0.61	-0.53	-0.06	-0.23	-0.07	0.18	-0.2
YFL039C	YFL039C || ACT1 (1)	-0.05	0.05	0.08	0.05	0.12	-0.03	0.09	0.39	0.22	0.28	0.67	0.88
YFL041W	YFL041W || FET5 (1)	-0.26	-0.53	-0.58	-0.38	-0.36	-0.32	-0.18	-0.31	0.31	0.01	0.28	-0.03
YFL042C	YFL042C || (1)	0.64	0.4	0.59	0.54		0.28	0.46	0.41	0.03	0.38	0.28	-0.39
YFL044C	YFL044C || (1)	-0.08	0.2	-0.04	0.11	0.03	0.03	0.28	0.24	0.11	0.28	-0.37	-0.26
YFL045C	YFL045C || SEC53 (1)	-0.48	-0.36	-0.22	-0.38	-0.52	-0.35	-0.15	-0.16	-0.13	-0.35	-0.2	0.06
YFL046W	YFL046W || (1)	0.06	0.43	0.23	-0.3	0.18	0.17	0.14	-0.27	-0.36	0.09	0.35	0.42
YFL047W	YFL047W || RGD2 (1)	-0.29	-0.55	-0.14	-0.43	-0.27	-0.33	-0.54	-0.44	0.31	-0.15	-0.1	-0.39
YFL048C	YFL048C || EMP47 (1)	0.04	0.15	0.11	0.09	-0.04	0.15	-0.38	0.25	-0.14	0.14	-0.13	0.19
YFL049W	YFL049W || (1)	0.03	0.07	0.03	0.02	-0.13	-0.02	0.1	0.32	-0.33	0.04	0.43	-0.13
YFL050C	YFL050C || ALR2 (1)	0.04	0.11	0.01	0.08	0	-0.18	-0.22	0.57	-0.33	-0.19	-0.08	-0.36
YFL051C	YFL051C || (1)	0.25	0.39	0.14	0.73	0.23	0.18	0.29	2.12	-0.12	0.14	0.17	-0.36
YFL052W	YFL052W || (1)									0.38
YFL053W	YFL053W || DAK2 (1)	-0.15	-0.45	0.07	-0.14		0.07	0.63	-0.02	0.45	-0.1	-0.8	-0.66
YFL054C	YFL054C || (1)	-0.27	-0.31	-0.38	-0.26	-0.25	-0.38	-0.35	0.02	0.1	0.47	0.79	-0.48
YFL055W	YFL055W || AGP3 (1)									0.19	0.25	0.93	-0.4
YFL056C	YFL056C || AAD6 (1)	0.41	0.54	1.04	0.1	1.6	0.87	0.15	0.61	0.59	0.59	-0.1	0.42
YFL057C	YFL057C || AAD16 (1)	-0.35	-0.24	-0.03	-0.56		-0.1	-0.62		0.2	0.59	-0.15	0.32
YFL058W	YFL058W || THI5 (1)	0.11	0.38	0	0.36	0.27	1.36	0.82	0.8	-0.08	1.16	1.03	0.65
YFL059W	YFL059W || SNZ3 (1)	-0.49	-0.07	-0.83	0.36	-0.04	-0.18	0.35	0.2	0.77	1.08	1.31	0.43
YFL060C	YFL060C || SNO3 (1)			-0.24	-0.1					0.46	0.18	0.45	-0.1
YFL061W	YFL061W || (1)	-0.09	-0.1	0.42	1.07	0.46	-0.67	0.96	1.69	-0.67	1.79	1.47	0.18
YFL062W	YFL062W || COS4 (1)	0.21	0.04	0.28	0.45	0.03	0.55	0.28	0.51	0.38	1.11	0.76	0.18
YFL063W	YFL063W || (1)			-0.11	0.63					-0.11	-0.19	-0.12	0.41
YFL064C	YFL064C || (1)	-0.29	-0.38	-0.46	-0.15	-0.2	-0.92	-0.72		-0.18	-0.24	0.15	-0.25
YFL065C	YFL065C || (1)	0.68	0.9	0.24	0.61	0.7	0.52	0.55	0.01	-0.12	0.07	0.04	-0.17
YFL066C	YFL066C || (1)	-0.22	-0.27	-0.67	-0.22	0	-0.07	-0.48	-0.09	1.29	-0.02	0.26	0.1
YFL067W	YFL067W || (1)	-0.18	-0.44	-0.71	-0.06	-0.03	-0.67	-0.51	-1.03	0.14	-0.58	-0.32	-0.16
YFL068W	YFL068W || (1)	-0.82	-0.87	-1.11	-0.81	-0.76	-1	-0.91	-0.98	0.02	-0.57	-0.09	-0.38
YFR001W	YFR001W || LOC1 (1)	0	0.09	0.16	0.19	-0.05	0.33	0.29	0.41	-0.17	0.01	-0.02	0.11
YFR002W	YFR002W || NIC96 (1)	-0.02	-0.04	0.27	-0.25	-0.29	0.17	-0.03	0.03	0.37	0.04	-0.22	-0.26
YFR003C	YFR003C || YPI1 (1)	0.11	0.43	0.37	0.15	0.14	0.2	0.36	0.07	0.12	0.36	0.51	0.32
YFR004W	YFR004W || RPN11 (1)	-0.25	-0.23	-0.11	-0.05	-0.38	-0.03	0.08	0.2	0.03	0.15	0.02	0.14
YFR005C	YFR005C || SAD1 (1)			0.49	0.15					-0.82	-0.49	-0.45	-0.22
YFR006W	YFR006W || (1)	-0.07	-0.23	-0.16	-0.27	-0.28	-0.1	-0.37	0.18	0.28	0.15	0.2	-0.19
YFR007W	YFR007W || (1)	0.16	0.21	0.16	0.22	0.15	0	0.18	-0.55	0.24	0.04	0.01	0.05
YFR008W	YFR008W || FAR7 (1)									0.2	0.16	0.23	-0.38
YFR009W	YFR009W || GCN20 (1)	-0.02	-0.31	-0.13	-0.09	-0.2	-0.01	-0.21	0.14	-0.33	-0.39	-0.13	0.11
YFR010W	YFR010W || UBP6 (1)	-0.69	-0.45	-0.46	-0.33	-0.61	-0.38	-0.58	0.32	-0.1	0.14	-0.15	-0.37
YFR011C	YFR011C || (1)	0.15	0.16	0.2	0.28	-0.15	0.16	0.17	-0.55	0.42	0.08	0.69	0.55
YFR012W	YFR012W || (1)									0.87	0.57	0.75	0.53
YFR012W-A	YFR012W-A || (1)	-0.44	-0.35	-0.65	-0.22	-0.35	-0.06	-0.39	0.81	0.67	0.24	0.42	0.08
YFR013W	YFR013W || IOC3 (1)	-0.18	-0.25	-0.18	-0.08	-0.31	-0.31	-0.24	-0.07	0.03	-0.09	-0.71	-0.29
YFR014C	YFR014C || CMK1 (1)	-0.24	-0.15	-0.14	-0.14	-0.36	-0.3	-0.5	0.02	0.24	0.35	0.24	-0.11
YFR015C	YFR015C || GSY1 (1)	0.17	-0.53	-2.05	-0.95	-0.06	-0.59	-1.12	-1.11	0.12	0.68	0.83	-1.04
YFR016C	YFR016C || (1)	-0.07	-0.04	-0.41	-0.31	-0.2	-0.44	-0.15	0.29	-0.16	0.19	0.03	-0.43
YFR017C	YFR017C || (1)	0.14	-0.13	-0.18	-0.5	0.12	-0.72	-0.76	-0.56	0.48	0.99	1.6	-0.86
YFR018C	YFR018C || (1)	-0.1	-0.06	-0.13	0.34	-0.06	0.27	0.26	0.55	-0.3	0.67	0.29	-0.92
YFR019W	YFR019W || FAB1 (1)	-0.29	-0.23	-0.42	-0.55	-0.2	-0.52	-0.33	0.32	-0.11	-0.24	0	-0.45
YFR020W	YFR020W || (1)	0.5	0.84	0.17	0.45	0.58	0.19	0.48	0.38	-0.62	0.15	-0.86	-0.21
YFR021W	YFR021W || ATG18 (1)	-0.34	-0.42	-0.75	-0.41	-0.3	-0.53	-0.59	-0.64	-0.22	-0.34	-0.55	-0.7
YFR022W	YFR022W || ROG3 (1)	-0.33	-0.39	-0.17	-0.41			0	-0.12	0.02	-0.25	0.33	-0.52
YFR023W	YFR023W || PES4 (1)									0.71	0.92	0.88	1.47
YFR024C	YFR024C || (1)	-0.3	-0.19	-0.43	-0.36	-0.22	-0.29	-0.26	-0.49	0.14	0.13	0.11	-0.35
YFR024C-A	YFR024C-A || LSB3 (1)	-0.19	-0.21	-0.45	-0.33	-0.18	-0.29	-0.21	-0.47	0.21	0.2	0.14	-0.34
YFR025C	YFR025C || HIS2 (1)	0.44	0.34	0.69	0.04	0.35	0.24	0.07	-0.33	-0.13	-0.06	0.02	0
YFR026C	YFR026C || (1)	0.44	0.55	0.26	0.42	0.38	0.25	0.58	0.51	0.14	0.28	-0.27	-0.05
YFR027W	YFR027W || ECO1 (1)	0.29	0.32	0.35	-0.2		-0.1			0.19	-0.03	0.16	-0.24
YFR028C	YFR028C || CDC14 (1)	-0.08	-0.4	-0.28	-0.35	-0.54	-0.5	-0.63	-0.62	-0.04	-0.45	-0.62	-0.15
YFR029W	YFR029W || PTR3 (1)	-0.58	-0.54	-0.65	-0.6	-0.49	-0.72	-0.73	-0.71	-0.18	-0.33	-0.32	-0.41
YFR030W	YFR030W || MET10 (1)	0.02	-0.45	-0.54	0.18	0.25	-0.43	-0.57	-0.84	-0.54	0.12	0.59	-0.65
YFR031C	YFR031C || SMC2 (1)	0.38	0.41	0.28	0.23	0.22	0.29	0.37	0.6	-0.19	0.11	0.06	-0.24
YFR031C-A	YFR031C-A || RPL2A (1)	0.16	0.15	-0.03	0.36	0.13	0.14	0.15	0.13	0.16	-0.03	-0.03	-0.12
YFR032C	YFR032C || (1)	-0.19	-0.1	-0.88	-0.76		0.04	-0.46	0.31	-0.85	0.15	-0.94	-1.04
YFR032C-A	YFR032C-A || RPL29 (1)	-0.22	-0.18	-0.31	-0.12	-0.06	0.08	0.01	-0.27	-0.16	0.21	0.05	0.47
YFR033C	YFR033C || QCR6 (1)	-0.11	-0.13	-0.45	-0.38	0.01	-0.29	-0.16	-0.51	0.46	-0.3	0.78	-0.68
YFR034C	YFR034C || PHO4 (1)	1.21	1.2	0.51	0.85	1.19	0.91	1.01	-0.18	0	-0.22	-0.57	-0.96
YFR035C	YFR035C || (1)	-0.74	-0.85	-1.15	-0.66	-0.65	-1.03	-1.26		-0.66	-0.3	0.2	1.58
YFR036W	YFR036W || CDC26 (1)			-0.24						-0.2	-0.47	-0.42	0.16
YFR037C	YFR037C || RSC8 (1)	0.47	0.48	0.33	0.34	0.13	0.2	0.23	-0.62	-0.11	-0.48	-0.4	-0.52
YFR038W	YFR038W || (1)			0.51		0.52	0.5		-0.09	-0.19	-0.16	-0.33	0.08
YFR039C	YFR039C || (1)	0.17	0.14	0.31	0.33	0.12	0.28	0.18	0.27	-0.1	0.24	-0.39	-0.18
YFR040W	YFR040W || SAP155 (1)	0.13	-0.02	0.16	0.21	0.12	0.07	-0.02	-0.5	-0.06	-0.17	-0.4	-0.13
YFR041C	YFR041C || ERJ5 (1)	0.49	0.29	0.62	0.62	0.45	0.41	0.72	-0.28	-0.29	-0.01	-0.42	0.13
YFR042W	YFR042W || (1)	0.01	0.04	0.32	0.12	-0.05	0.1	0.3	0.53	0.14	0.26	0.24	0.12
YFR043C	YFR043C || (1)	0	-0.08	0.23	-0.08	-0.27	0.18	-0.07	0.28	-0.33	0.11	-0.09	0.23
YFR044C	YFR044C || (1)	0.11	0.09	-0.12	-0.12	0.11	0.17	0.09	0.02	0.54	0.04	0.17	-0.61
YFR045W	YFR045W || (1)	0.01	0.22	-0.1	-0.07	0.11	0.06	0.23	-0.61	0.31	0.24	0.57	-0.03
YFR046C	YFR046C || CNN1 (1)	0.1	-0.42	0.18	-0.32	-0.42	-0.49	-0.39	-0.58	0.14	0	0.07	-0.28
YFR047C	YFR047C || BNA6 (1)	0.02	0.19	0.31	0.13	0.18	0.11	0.33	0.05	0.13	-0.11	-0.15	0.64
YFR048W	YFR048W || RMD8 (1)	-0.08	-0.01	0.51	-0.24					-0.09	-0.25	-0.37	-0.2
YFR049W	YFR049W || YMR31 (1)	-0.48	-0.27	-0.5	-0.52	-0.4	-0.37	-0.24	0.6	0.22	0.11	0.78	-0.03
YFR050C	YFR050C || PRE4 (1)	0.16	0.49	0.47	0.47	0.41	0.55	0.53	0.09	0.29	0.25	0.05	0
YFR051C	YFR051C || RET2 (1)	-0.17	-0.23	-0.34	-0.17	-0.13	-0.42	-0.5	-0.93	-0.12	-0.18	-0.25	-0.81
YFR052W	YFR052W || RPN12 (1)	-0.56	-0.41	-0.36	-0.45	-0.46	-0.5	-0.51	0	0.3	0.2	0.15	-0.47
YFR053C	YFR053C || HXK1 (1)	0.02	-0.54	-3.26	-0.96	-0.15	-1.09	-1.05	-0.72	0.95	0.63	1.77	-1
YFR054C	YFR054C || (1)									0.24	0.02	0.22	0.19
YFR055W	YFR055W || (1)	0.31	0.12	1.29	0.84	0.27	0.86	0.77	-0.01	-0.5	-0.67	-1.27	-0.76
YFR056C	YFR056C || (1)									-0.34	-0.18	-0.78	-0.43
YFR057W	YFR057W || (1)									0.28
YGL001C	YGL001C || ERG26 (1)	-0.14	-0.25	0.34	-0.01	-0.17	-0.12	-0.11	0.49	-0.97	0.14	-0.11	-0.09
YGL002W	YGL002W || ERP6 (1)	-0.15	-0.19	0.05	-0.26	-0.31	0.15	-0.08	0.08	0.31	-0.16	0.08	0.05
YGL003C	YGL003C || CDH1 (1)	0.28	0.4	0.39	0.22	0.7	0.3	0.14	-0.37	0.11	-0.02	-0.09	-0.03
YGL004C	YGL004C || RPN14 (1)	-0.17	-0.11	-0.29	-0.08	-0.33	-0.42	-0.14	-0.24	-0.08	-0.16	-0.26	-0.41
YGL005C	YGL005C || COG7 (1)	0.15	-0.01	0.48	0.17	0.19	0.62	0.18	0.23	-0.2	-0.03	-0.06	-0.14
YGL006W	YGL006W || PMC1 (1)	-0.02	0.22	0.14	0.36	0.28	0.02	-0.14	0.11	0.58	0.82	0.89	0.04
YGL007W	YGL007W || (1)	0.31	0.19	0.21	0.29		0.74	0.61		-0.04	-0.09	-0.6	-0.54
YGL008C	YGL008C || PMA1 (1)	0.38	0.19	0.21	0.14	0.54	0.18	0.31	-0.21	0.74	-0.42	0.56	1.84
YGL009C	YGL009C || LEU1 (1)	-0.28	-0.26	0.09	0.01	-0.19	0.39	0.59	0.01	-1.66	0.13	-1.68	-0.32
YGL010W	YGL010W || (1)	0.32	0.86	0.33	0.38	0.87	0.65	0.56	0.14	0.08	0.71	0.64	0.47
YGL011C	YGL011C || SCL1 (1)	-0.16	0.04	-0.02	0.08	0.02	-0.08	-0.21	-0.01	0.04	0.44	0.16	0.21
YGL012W	YGL012W || ERG4 (1)	-0.16	-0.39	0.12	-0.17	0	-0.06	0.17	-0.15	0.08	-0.03	0.06	0.23
YGL013C	YGL013C || PDR1 (1)	0.02	0.19	0.09	0.2	0.19	0.15	0.35	-0.13	0.01	0.15	-0.06	0.48
YGL014W	YGL014W || PUF4 (1)	-0.73	-0.78	-1.03	-0.82	-0.82	-0.91	-0.74	-0.06	-0.41	-0.52	-0.66	-0.48
YGL015C	YGL015C || (1)	-0.39	0.06	-0.15	0.22		-0.33	0.09		-0.17	0.45	0.04	-0.26
YGL016W	YGL016W || KAP122 (1)	-0.33	-0.28	-0.27	-0.06	-0.41	-0.2	-0.39	0.06	-0.13	-0.08	-0.64	-0.06
YGL017W	YGL017W || ATE1 (1)	-0.34	-0.31	-0.2	-0.4	-0.46	-0.46	-0.53	0.04	0.08	-0.11	0.04	-0.82
YGL018C	YGL018C || JAC1 (1)	0.36	0.5	0.42	0.43	0.69	0.45	0.64	-0.9	0.04	0.17	0.26	0.3
YGL019W	YGL019W || CKB1 (1)	0.21	0.29	0.32	0.09	0.11	0.03	0.1	-0.04	-0.02	0.03	-0.16	0
YGL020C	YGL020C || MDM39 (1)	0.68	0.61	0.81	0.59	0.75	0.9	0.7	0.21	0.04	0.28	-0.18	0.5
YGL021W	YGL021W || ALK1 (1)	-0.34	-0.46	-0.24	-0.4	-0.71	-0.3	-0.48	-3.64	-0.95	-0.01	0.39	0.06
YGL022W	YGL022W || STT3 (1)	-0.2	-0.21	-0.33	-0.18	-0.16	-0.27	-0.17	-0.62	0.13	-0.09	-0.29	-0.07
YGL023C	YGL023C || PIB2 (1)	-0.31	-0.24	-0.43	-0.15	-0.15	-0.62	-0.6	-0.65	0.01	-0.1	-0.31	-0.59
YGL024W	YGL024W || (1)	-0.23	-0.53	0.04	-0.38	-0.33	-0.52	-0.17		-0.19	-0.43	-0.32	-0.1
YGL025C	YGL025C || PGD1 (1)	-0.32	-0.4	-0.51	-0.5	-0.38	-0.59	-0.67	-0.99	-0.02	-0.06	-0.32	-0.2
YGL026C	YGL026C || TRP5 (1)	0.15	0.3	-0.02	0.32	0.26	0.1	0.07	0.49	-0.33	0.66	-0.21	-0.84
YGL027C	YGL027C || CWH41 (1)	-0.15	-0.08	-0.02	-2.22	-0.04	0.13	-0.05	0.17	-0.01	0.12	-0.41	-0.42
YGL028C	YGL028C || SCW11 (1)	0.34	0.12	-0.02	0.09	0.48	0.38	0.31	-0.8	0.24	-0.87	-0.21	0.39
YGL029W	YGL029W || CGR1 (1)	-0.26	-0.24	-0.51	-0.13	-0.41	-0.06	-0.17	-0.06	-0.05	-0.32	-0.6	-0.09
YGL030W	YGL030W || RPL30 (1)	0.71	0.82	0.67	0.81	0.72	1	0.73	0.41	0.54	0.53	0.61	0.46
YGL031C	YGL031C || RPL24A (1)	0.78	0.81	0.85	0.83	0.83	0.9	0.85	0.06	0.18	-0.01	-0.13	0.49
YGL032C	YGL032C || AGA2 (1)	0.75	0.62	0.55	-0.43	0.91	1.18	0.67	-0.43	-0.54	-0.05	2.44	0.63
YGL033W	YGL033W || HOP2 (1)									-0.18	0.25	0.64
YGL034C	YGL034C || (1)									-0.34	0.34	0.53
YGL035C	YGL035C || MIG1 (1)	0.1	-0.09	-0.35	-0.29	-0.11	-0.24	-0.27	-0.33	-0.22	-0.31	-0.49	-0.31
YGL036W	YGL036W || (1)	-0.28	-0.35	-0.53	-0.1	-0.5	-0.3	-0.35	0.18	-0.64	-0.08	0.37	-0.15
YGL037C	YGL037C || PNC1 (1)	0.14	0.19	-0.78	0.07	0.33	-0.16	-0.08	0.16	1.25	0.45	1.26	0.4
YGL038C	YGL038C || OCH1 (1)	-0.21	-0.02	-0.05	-0.13	0.2	0.32	-0.36	-0.54	0.43	0.01	-0.16	-0.09
YGL039W	YGL039W || (1)	-0.16	-0.08	0.05	0.01	0.05	-0.11	-0.49	-0.11	-1.49	0.28	-0.36	-0.14
YGL040C	YGL040C || HEM2 (1)	0.38	0.16	0.15	0.15	0.69	0.1	0.48	-0.03	-0.28	-0.42	-0.06	-0.37
YGL041C	YGL041C || (1)	-1.04	-0.9	-0.84	-0.88	-0.9	-0.92	-0.97		0.04	-0.07	0.05	0.06
YGL042C	YGL042C || (1)	-1.22	-1.14	-0.86	-1.1	-1.02	-1.15	-1.2		-0.1	-0.17	-0.27	-0.15
YGL043W	YGL043W || DST1 (1)	-0.6	-0.47	-0.24	-0.49	-0.4	-0.5	-0.7	-0.2	-0.03	-0.21	-0.4	-0.43
YGL044C	YGL044C || RNA15 (1)	-0.2	-0.39	0.09	-0.01	-0.18	-0.16	-0.27	0.05	-0.47	0.35	-0.29	0.26
YGL045W	YGL045W || RIM8 (1)	0.4	0.71	0.41	0.8	0.78	0.38	0.44	0.1	-0.09	0.16	-0.14	0
YGL046W	YGL046W || (1)		0.24	0.98						0.29	0.42	0.26	0.49
YGL047W	YGL047W || ALG13 (1)	-0.37	0.2	-0.67	-0.14	-0.21	-0.09	-0.07	0.44	0.25	0.27	0.57	-0.05
YGL048C	YGL048C || RPT6 (1)	-0.13	-0.11	-0.08	-0.06	-0.04	0.16	-0.1	-0.12	-0.05	0.07	-0.13	-0.14
YGL049C	YGL049C || TIF4632 (1)	-0.41	-0.27	-0.38	-0.2	-0.45	-0.3	-0.23	0.06	-0.34	-0.05	-0.32	-0.57
YGL050W	YGL050W || (1)	-0.63	-0.51	-0.5	-0.54	-0.79	-0.29	-0.4	-0.08	-0.07	-0.21	-0.51	-0.11
YGL051W	YGL051W || MST27 (1)				0.16					0.23	0.55	0	0.19
YGL052W	YGL052W || (1)	-0.81	-0.33	-0.63	-0.66	-0.43	-0.44	-0.66	0.23	0.01	0.75	0.3	0.04
YGL053W	YGL053W || PRM8 (1)	0.68	0.6	0.78	0.79	0.74	0.8	0.82	0.03	0.24	1.11	0.67	0.16
YGL054C	YGL054C || ERV14 (1)	0.04	-0.05	0.21	-0.05	0.02	0.13	0.04	0.03	-0.06	-0.02	-0.17	0.41
YGL055W	YGL055W || OLE1 (1)	1.19	1.43	1.51	0.91	1.37	1.31	1.11	-0.07	-0.13	0.6	0.36	1.75
YGL056C	YGL056C || SDS23 (1)	0.06	0.11	0.15	0.03	0.16	-0.03	0.24	0.02	-0.42	-0.22	-0.23	0.42
YGL057C	YGL057C || (1)	0.44	0.43	0.29	0.38	0.47	0.34	0.3	-0.42	-0.01	-0.2	0.13	1.22
YGL058W	YGL058W || RAD6 (1)	-0.25	-0.14	-0.12	0.05	-0.3	-0.06	-0.09	0.6	-0.28	-0.15	-0.48	-0.17
YGL059W	YGL059W || (1)	-0.19	0.05	-0.01	-0.11	-0.16	-0.38	-0.18	0.3	0.05	0.13	0.62	0.17
YGL060W	YGL060W || YBP2 (1)	-0.21	-0.14	-0.03	-0.2	-0.01	-0.19	-0.22	0.04	0.1	0.31	0.29	-0.16
YGL061C	YGL061C || DUO1 (1)	-0.16					0.34	0.17	-0.47	0.1	0.36	0.01	-0.08
YGL062W	YGL062W || PYC1 (1)	0.75	0.91	0.9	1.08	1.56	0.81	1.3	0.17	0.36	0.43	0.71	-0.35
YGL063W	YGL063W || PUS2 (1)	-0.27	-0.33	-0.58	-0.37	-0.3	-0.78	-0.63		-0.04	-0.48	-0.21	-1.22
YGL064C	YGL064C || MRH4 (1)	0.03	0.02	0.08	0.1	0.07	0.18	0.36	-0.32	0.1	-0.19	-0.09	-0.14
YGL065C	YGL065C || ALG2 (1)	0.16	-0.1	0.07	0	-0.18	0.09	0.26	0.1	-0.25	-0.11	-0.18	-0.16
YGL066W	YGL066W || SGF73 (1)	-0.04	-0.05	-0.02	-0.11	-0.12	-0.27	-0.21	-0.11	-0.09	-0.18	-0.22	-0.22
YGL067W	YGL067W || NPY1 (1)	-0.33	-0.15	-0.26	-0.12	-0.32	-0.01	-0.15	0.14	-0.09	-0.48	-0.48	-0.23
YGL068W	YGL068W || MNP1 (1)	0.46	0.41	0.28	0.18	0.64	0.27	0.68	-0.54	0.42	-0.09	0.36	0.51
YGL069C	YGL069C || (1)	0.01	-0.26	-0.33	-0.5	0.16	-0.39	-0.07		-0.14	-0.14	0.16	0.93
YGL070C	YGL070C || RPB9 (1)	-0.35	-0.28	-0.08	-0.28	-0.39	-0.11	-0.29	-0.17	0.15	-0.2	-0.46	-0.36
YGL071W	YGL071W || RCS1 (1)	-0.01	-0.24	-0.12	-0.17	-0.05	-0.21	0.03	0	-0.14	0.14	-0.24	0.03
YGL072C	YGL072C || (1)	-0.78	-0.65	-0.55	-0.6	-0.45	-0.78	-0.48	-0.7	-0.24	0.28	-0.17	-0.03
YGL073W	YGL073W || HSF1 (1)	-0.1	-0.1	-0.37	-0.27	0.01	-0.26	-0.16	-0.21	-0.16	-0.09	-0.26	-0.35
YGL074C	YGL074C || (1)									0.06	-0.1	-0.32	-0.4
YGL075C	YGL075C || MPS2 (1)	0.26	0.19	0.6	0.5		0.65	0.14		-0.25	-0.61	-0.43	0.98
YGL076C	YGL076C || RPL7A (1)	-0.05	0.03	-0.11	0.16	-0.04	0.08	-0.02	-0.83	-0.32	-0.39	-0.61	0.53
YGL077C	YGL077C || HNM1 (1)	-0.02	-0.16	0.35	-1.11	-0.3	-0.31	-0.16	-0.04	-0.59	-0.59	-0.5	0.1
YGL078C	YGL078C || DBP3 (1)	0.37	0.38	0.1	0.42	0.06	0.41	0.2	0.12	-0.15	-0.51	-0.81	-0.16
YGL079W	YGL079W || (1)	-0.23	0.09	-0.01	-0.02	-0.21	0.18	-0.03	0.35	-0.27	0.13	-0.11	0.03
YGL080W	YGL080W || (1)	0.87	0.89	0.91	0.94	0.9	1.05	1.08	-0.46	-0.17	0.44	0.28	0.89
YGL081W	YGL081W || (1)	-0.33	-0.1	-0.42	0.06	-0.16	-0.19	-0.09	0.48	0.46	0.72	1.24	0.17
[truncated: 4,181 more rows]
