# Supplementary material for: Quantitative proteomic analysis reveals posttranslational responses to aneuploidy in yeast
Source: eLife journal article supplement (doi:10.7554/elife.03023), 2014-07-29
Supplement: supp [file elife-03023-supp-v1.zip › elife_poa_e03023_Figure_2_source_data_2.xlsx]

## Sheet: TMT
Date	Fri Jul 18 09:51:55 EDT 2014
Aspect	C
P-value cutoff	0.01
Calculate FDR	Yes
Regulation links followed	Yes
Bonferroni correction	Yes
Annotation file	gene_association.sgd
Uploaded background file	TMT bgn prot (2642).txt
Evidence codes used	IEA (44873), IEP (125), IGI (3556), IBA (218), IPI (2635), ND (3833), IC (811), ISS (2092), RCA (2), IDA (19767), IMP (11768), TAS (992), ISM (957), NAS (671), ISO (10), ISA (229)
Unknown identifiers (3)	YBR292C YAR075W YAR073W
GOID	TERM	CORRECTED_PVALUE	UNCORRECTED_PVALUE	NUM_LIST_ANNOTATIONS	LIST_SIZE	TOTAL_NUM_ANNOTATIONS	POPULATION_SIZE	FDR_RATE	EXPECTED_FALSE_POSITIVES	ANNOTATED_GENES
GO:0044391	ribosomal subunit	6.70565e-43	1.78817e-45	113	550	159	2642	0	0	YLR325C, YBR268W, YEL050C, YNR037C, YLR061W, YER102W, YOL120C, YOR234C, YLR439W, YBL087C, YMR194W, YOL039W, YBR251W, YPL198W, YBL092W, YHL033C, YER117W, YKR057W, YPL131W, YPL013C, YLR167W, YLR048W, YPR166C, YMR116C, YML063W, YBR048W, YBR282W, YIL069C, YNR036C, YLR185W, YMR142C, YER050C, YJL136C, YML024W, YPL090C, YHR203C, YBL072C, YPL143W, YPL220W, YHR147C, YPR132W, YLR287C-A, YBR084C-A, YNR022C,…
GO:0022626	cytosolic ribosome	1.17692e-37	3.13844e-40	91	550	120	2642	0	0	YLR325C, YLR061W, YER102W, YOL120C, YOR234C, YBL087C, YMR194W, YOL039W, YPL198W, YBL092W, YHL033C, YER117W, YKR057W, YPL131W, YLR167W, YLR048W, YMR116C, YML063W, YBR048W, YIL069C, YLR185W, YMR142C, YJL136C, YML024W, YPL090C, YHR203C, YBL072C, YPL143W, YPL220W, YPR132W, YLR287C-A, YBR084C-A, YLR448W, YOR182C, YJR047C, YMR230W, YJR094W-A, YKL006W, YKL156W, YBR191W, YHR021C, YOR312C, YNL096C, YEL054…
GO:0005840	ribosome	1.38696e-34	3.69857e-37	131	550	229	2642	0	0	YLR325C, YBR268W, YHL035C, YER102W, YPL215W, YOR234C, YBL087C, YBL092W, YER117W, YKR057W, YPL131W, YPL013C, YLR167W, YML063W, YBR048W, YBR282W, YIL069C, YBL028C, YNL122C, YLR185W, YMR142C, YER050C, YJL136C, YML024W, YBL072C, YPL143W, YHR147C, YBR084C-A, YNL137C, YJR047C, YMR230W, YJR094W-A, YNL177C, YOR091W, YBR191W, YHR021C, YOR312C, YNL096C, YEL054C, YOL121C, YNL069C, YLR029C, YHR080C, YIL148W,…
GO:0032991	macromolecular complex	5.08321e-32	1.35552e-34	369	550	1163	2642	0	0	YLR325C, YNL139C, YER102W, YBR079C, YOR234C, YHR051W, YBL087C, YBL092W, YKL166C, YPL131W, YLR167W, YOR341W, YLL022C, YNL062C, YOL005C, YEL003W, YBR279W, YIL115C, YML063W, YHR001W-A, YBR048W, YHL023C, YNL122C, YPL217C, YLR185W, YLR009W, YOR303W, YMR142C, YER050C, YJL136C, YML024W, YIL027C, YMR205C, YIL084C, YHR089C, YNL038W, YBL003C, YBL072C, YJL166W, YPL143W, YNL031C, YHR167W, YBR084C-A, YMR230W,…
GO:0044445	cytosolic part	1.05971e-29	2.82589e-32	97	550	153	2642	0	0	YLR325C, YLR061W, YER102W, YOL120C, YOR234C, YBL087C, YMR194W, YOL039W, YPL198W, YBL092W, YHL033C, YER117W, YKR057W, YPL131W, YLR167W, YLR048W, YMR116C, YML063W, YBR048W, YOR157C, YIL069C, YLR185W, YMR142C, YJL136C, YML024W, YPL090C, YMR205C, YHR203C, YBL072C, YPL143W, YPL220W, YPR132W, YLR287C-A, YBR084C-A, YLR448W, YOR182C, YJR047C, YMR230W, YJR094W-A, YKL006W, YKL156W, YPL231W, YBR191W, YHR021…
GO:0030529	ribonucleoprotein complex	7.58342e-25	2.02225e-27	179	550	431	2642	0	0	YLR325C, YBR268W, YHL035C, YPL126W, YER102W, YPL215W, YBR079C, YOR234C, YBL087C, YBL092W, YLR275W, YER117W, YKR057W, YBL026W, YPL131W, YPL013C, YLR167W, YML063W, YBR048W, YBR282W, YIL069C, YBL028C, YNL122C, YPL217C, YLR185W, YLR009W, YMR142C, YER050C, YJL136C, YML024W, YHR089C, YBL072C, YPL143W, YHR147C, YBR084C-A, YNL137C, YJR047C, YMR230W, YJR094W-A, YNL177C, YOR091W, YBR191W, YHR021C, YOR312C,…
GO:0015934	large ribosomal subunit	4.09544e-24	1.09212e-26	66	550	92	2642	0	0	YLR325C, YBR268W, YEL050C, YLR061W, YOL120C, YOR234C, YLR439W, YBL087C, YMR194W, YOL039W, YPL198W, YBL092W, YHL033C, YER117W, YPL131W, YBR282W, YMR142C, YLR185W, YPL220W, YPL143W, YHR147C, YNR022C, YBR084C-A, YLR448W, YJR094W-A, YKL006W, YNL177C, YBL038W, YBR191W, YOR312C, YEL054C, YNL069C, YLR029C, YPL173W, YIL148W, YJL177W, YHL001W, YNL005C, YNL284C, YNL162W, YNL301C, YIL018W, YLR075W, YLR340W,…
GO:0043228	non-membrane-bounded organelle	5.17017e-23	1.37871e-25	254	550	735	2642	0	0	YLR325C, YBR268W, YHL035C, YKR083C, YPL126W, YER102W, YPL215W, YJL052W, YBR079C, YOR234C, YBL087C, YBL092W, YKR029C, YER117W, YKR057W, YBL026W, YPL131W, YPL013C, YJR063W, YLR167W, YOR341W, YLR383W, YBR279W, YMR078C, YJR009C, YOL080C, YML063W, YBR048W, YBR282W, YIL069C, YBL028C, YNL122C, YPL217C, YLR185W, YLR009W, YMR142C, YNL020C, YER050C, YJL136C, YML024W, YIL084C, YHR089C, YBL003C, YBL072C, YPL…
GO:0043232	intracellular non-membrane-bounded organelle	5.17017e-23	1.37871e-25	254	550	735	2642	0	0	YLR325C, YBR268W, YHL035C, YKR083C, YPL126W, YER102W, YPL215W, YJL052W, YBR079C, YOR234C, YBL087C, YBL092W, YKR029C, YER117W, YKR057W, YBL026W, YPL131W, YPL013C, YJR063W, YLR167W, YOR341W, YLR383W, YBR279W, YMR078C, YJR009C, YOL080C, YML063W, YBR048W, YBR282W, YIL069C, YBL028C, YNL122C, YPL217C, YLR185W, YLR009W, YMR142C, YNL020C, YER050C, YJL136C, YML024W, YIL084C, YHR089C, YBL003C, YBL072C, YPL…
GO:0022625	cytosolic large ribosomal subunit	2.08298e-22	5.55462e-25	50	550	61	2642	0	0	YLR325C, YOR312C, YEL054C, YNL069C, YLR061W, YOL120C, YOR234C, YLR029C, YBL087C, YMR194W, YOL039W, YPL198W, YBL092W, YIL148W, YHL033C, YJL177W, YER117W, YPL131W, YHL001W, YNL162W, YNL301C, YIL018W, YLR075W, YLR340W, YBR031W, YHR010W, YKL180W, YMR142C, YNL067W, YLR185W, YKR094C, YLR406C, YPR102C, YHR141C, YPL220W, YPL143W, YPL249C-A, YMR242C, YBR084C-A, YLR448W, YML073C, YOR063W, YIL052C, YOL127W,…
GO:0015935	small ribosomal subunit	5.89018e-16	1.57071e-18	47	550	67	2642	0	0	YNL096C, YOL121C, YNR037C, YER102W, YNL178W, YBR251W, YKR057W, YNL306W, YPL013C, YLR167W, YLR048W, YPR166C, YHL015W, YLR367W, YMR116C, YML063W, YBR048W, YOR369C, YJR113C, YIL069C, YOR096W, YER131W, YBR181C, YNR036C, YJR145C, YML026C, YOR167C, YER050C, YJL136C, YML024W, YPL090C, YHR203C, YOR293W, YBL072C, YJR123W, YPR132W, YOL040C, YLR287C-A, YNL137C, YOR182C, YMR143W, YMR230W, YER074W, YKL156W, Y…
GO:0022627	cytosolic small ribosomal subunit	1.29816e-15	3.46176e-18	38	550	48	2642	0	0	YNL096C, YOL121C, YER102W, YNL178W, YKR057W, YLR167W, YLR048W, YHL015W, YLR367W, YMR116C, YML063W, YBR048W, YOR369C, YIL069C, YOR096W, YER131W, YBR181C, YJR145C, YML026C, YOR167C, YJL136C, YML024W, YPL090C, YHR203C, YOR293W, YBL072C, YJR123W, YPR132W, YOL040C, YLR287C-A, YOR182C, YMR143W, YMR230W, YER074W, YKL156W, YJL191W, YNL302C, YHR021C
GO:0005829	cytosol	4.5746e-11	1.21989e-13	122	550	327	2642	0	0	YHL025W, YLR325C, YNL068C, YLR061W, YER102W, YOL120C, YOR234C, YBL087C, YMR194W, YOL039W, YPL198W, YBL092W, YHL033C, YER117W, YKR057W, YPL131W, YLR167W, YPL111W, YLR048W, YMR120C, YIL143C, YMR116C, YML063W, YBR048W, YOR157C, YIL069C, YOL055C, YLR185W, YMR142C, YBL018C, YJL136C, YML024W, YPL090C, YMR205C, YIL084C, YHR203C, YKL022C, YBL072C, YPL143W, YPL220W, YPR132W, YOL094C, YLR287C-A, YBR084C-A,…
GO:0044422	organelle part	2.19865e-08	5.86306e-11	370	550	1457	2642	0	0	YNL111C, YLR325C, YNL139C, YER102W, YOR234C, YHR051W, YBL087C, YBL092W, YPL131W, YLR167W, YOR341W, YAR002C-A, YLL022C, YOL005C, YBR279W, YIL115C, YOL080C, YML063W, YHR001W-A, YBR048W, YHL023C, YPL217C, YLR185W, YLR009W, YMR142C, YNL020C, YER050C, YJL136C, YML024W, YIL027C, YLR201C, YHR017W, YIL084C, YHR089C, YNL038W, YBL003C, YBL072C, YJL166W, YPL143W, YNL031C, YHR167W, YBR084C-A, YMR230W, YOR037…
GO:0044446	intracellular organelle part	2.19865e-08	5.86306e-11	370	550	1457	2642	0	0	YNL111C, YLR325C, YNL139C, YER102W, YOR234C, YHR051W, YBL087C, YBL092W, YPL131W, YLR167W, YOR341W, YAR002C-A, YLL022C, YOL005C, YBR279W, YIL115C, YOL080C, YML063W, YHR001W-A, YBR048W, YHL023C, YPL217C, YLR185W, YLR009W, YMR142C, YNL020C, YER050C, YJL136C, YML024W, YIL027C, YLR201C, YHR017W, YIL084C, YHR089C, YNL038W, YBL003C, YBL072C, YJL166W, YPL143W, YNL031C, YHR167W, YBR084C-A, YMR230W, YOR037…
GO:0043233	organelle lumen	4.19589e-05	1.1189e-07	170	550	592	2642	0	0	YOR179C, YNL139C, YBR268W, YKR083C, YPL126W, YPL215W, YKR029C, YBL026W, YPL013C, YJR063W, YOR341W, YLL022C, YOL005C, YBR279W, YMR078C, YIL143C, YER069W, YOL080C, YBR282W, YIL069C, YBL028C, YPL217C, YLR009W, YOR116C, YER050C, YMR236W, YIL084C, YHR089C, YBL003C, YPL008W, YHR147C, YOL145C, YNL031C, YHR167W, YOR001W, YNL137C, YLR178C, YNL097C, YLR103C, YNL177C, YOL144W, YOL135C, YMR223W, YOL021C, YNL…
GO:0070013	intracellular organelle lumen	4.19589e-05	1.1189e-07	170	550	592	2642	0	0	YOR179C, YNL139C, YBR268W, YKR083C, YPL126W, YPL215W, YKR029C, YBL026W, YPL013C, YJR063W, YOR341W, YLL022C, YOL005C, YBR279W, YMR078C, YIL143C, YER069W, YOL080C, YBR282W, YIL069C, YBL028C, YPL217C, YLR009W, YOR116C, YER050C, YMR236W, YIL084C, YHR089C, YBL003C, YPL008W, YHR147C, YOL145C, YNL031C, YHR167W, YOR001W, YNL137C, YLR178C, YNL097C, YLR103C, YNL177C, YOL144W, YOL135C, YMR223W, YOL021C, YNL…
GO:0031981	nuclear lumen	5.34236e-05	1.42463e-07	131	550	430	2642	0	0	YOR179C, YNL139C, YKR083C, YPL126W, YKR029C, YBL026W, YJR063W, YOR341W, YLL022C, YOL005C, YBR279W, YMR078C, YIL143C, YOL080C, YIL069C, YBL028C, YPL217C, YLR009W, YOR116C, YMR236W, YIL084C, YHR089C, YBL003C, YPL008W, YOL145C, YNL031C, YHR167W, YOR001W, YNL097C, YLR103C, YOL144W, YOL135C, YMR223W, YOL021C, YNL096C, YBR111W-A, YOL077C, YNR046W, YOR310C, YMR263W, YLR052W, YMR048W, YNL147W, YOR272W, Y…
GO:0044452	nucleolar part	0.000108725	2.89934e-07	26	550	48	2642	0	0	YPL126W, YJR002W, YHR143W-A, YOR210W, YBL018C, YBR167C, YAL033W, YPR187W, YHR148W, YHR072W-A, YNL248C, YOR310C, YEL026W, YHR089C, YOR295W, YJR063W, YOR341W, YNL113W, YOR272W, YBR257W, YMR093W, YOR224C, YLR175W, YMR049C, YPR110C, YOR340C
GO:0031974	membrane-enclosed lumen	0.00027522	7.33921e-07	175	550	628	2642	0	0	YOR179C, YNL139C, YBR268W, YKR083C, YPL126W, YPL215W, YKR029C, YBL026W, YPL013C, YJR063W, YOR341W, YLL022C, YOL005C, YBR279W, YMR078C, YIL143C, YER069W, YOL080C, YBR282W, YIL069C, YBL028C, YPL217C, YLR009W, YOR116C, YER050C, YMR236W, YIL084C, YHR089C, YBL003C, YPL008W, YHR147C, YOL145C, YNL031C, YHR167W, YOR001W, YNL137C, YLR178C, YNL097C, YLR103C, YNL177C, YOL144W, YOL135C, YMR223W, YOL021C, YNL…
GO:0043234	protein complex	0.000850044	2.26678e-06	211	550	797	2642	0	0	YML127W, YOR179C, YNL139C, YLR033W, YKR083C, YPL126W, YBR079C, YHR051W, YNL131W, YKR029C, YKL166C, YJR063W, YOR341W, YER145C, YLR383W, YLL022C, YLR440C, YKL135C, YNL062C, YOL005C, YEL003W, YBR279W, YMR078C, YIL143C, YER019C-A, YIL115C, YHR001W-A, YHL023C, YOR303W, YOR116C, YPL271W, YIL027C, YMR205C, YMR236W, YIL084C, YNL038W, YBL003C, YJL166W, YOL145C, YNL031C, YPL022W, YHR167W, YOR001W, YNL097C,…

## Sheet: SILAC
Date	Fri Jul 18 09:54:48 EDT 2014
Aspect	C
P-value cutoff	0.01
Calculate FDR	Yes
Regulation links followed	Yes
Bonferroni correction	Yes
Annotation file	gene_association.sgd
Uploaded background file	SILAC bgn prot (2927).txt
Evidence codes used	IEA (44873), IEP (125), IGI (3556), IBA (218), IPI (2635), ND (3833), IC (811), ISS (2092), RCA (2), IDA (19767), IMP (11768), TAS (992), ISM (957), NAS (671), ISO (10), ISA (229)
Unknown identifiers (3)	YBR292C YAR075W YAR073W
GOID	TERM	CORRECTED_PVALUE	UNCORRECTED_PVALUE	NUM_LIST_ANNOTATIONS	LIST_SIZE	TOTAL_NUM_ANNOTATIONS	POPULATION_SIZE	FDR_RATE	EXPECTED_FALSE_POSITIVES	ANNOTATED_GENES
GO:0022626	cytosolic ribosome	1.77315e-40	5.68317e-43	86	486	120	2927	0	0	YLR325C, YLR061W, YER102W, YOL120C, YOR234C, YBL087C, YOL039W, YPL198W, YBL092W, YHL033C, YER117W, YKR057W, YPL131W, YLR167W, YMR116C, YML063W, YBR048W, YIL069C, YMR142C, YJL136C, YML024W, YPL090C, YHR203C, YBL072C, YPL143W, YPL220W, YPR132W, YLR287C-A, YBR084C-A, YBR189W, YOR182C, YMR230W, YKL006W, YJR094W-A, YKL156W, YBR191W, YHR021C, YOR312C, YNL096C, YEL054C, YOL121C, YNL069C, YNL178W, YLR029…
GO:0044391	ribosomal subunit	5.34791e-40	1.71407e-42	100	486	158	2927	0	0	YLR325C, YEL050C, YLR061W, YER102W, YOL120C, YOR234C, YLR439W, YBL087C, YOL039W, YPL198W, YBL092W, YHL033C, YER117W, YKR057W, YPL131W, YPL013C, YLR167W, YPR166C, YMR116C, YML063W, YBR048W, YBR282W, YIL069C, YMR142C, YJL136C, YML024W, YPL090C, YPL118W, YHR203C, YBL072C, YPL143W, YPL220W, YHR147C, YPR132W, YLR287C-A, YBR084C-A, YNL137C, YBR189W, YOR182C, YMR230W, YKL006W, YJR094W-A, YBL038W, YKL156…
GO:0044445	cytosolic part	3.45014e-29	1.10581e-31	89	486	159	2927	0	0	YLR325C, YLR061W, YER102W, YOL120C, YOR234C, YBL087C, YOL039W, YPL198W, YBL092W, YHL033C, YER117W, YKR057W, YPL131W, YLR167W, YMR116C, YML063W, YBR048W, YIL069C, YMR142C, YLR360W, YJL136C, YML024W, YPL090C, YHR203C, YBL072C, YPL143W, YPL220W, YPR132W, YLR287C-A, YBR084C-A, YBR189W, YOR182C, YMR230W, YKL006W, YJR094W-A, YPL281C, YKL156W, YBR191W, YHR021C, YOR312C, YNL096C, YEL054C, YOL121C, YNL069…
GO:0005840	ribosome	7.82842e-29	2.50911e-31	110	486	229	2927	0	0	YLR325C, YHL035C, YEL050C, YLR061W, YER102W, YOL120C, YOR234C, YLR439W, YBL087C, YOL039W, YPL198W, YBL092W, YHL033C, YER117W, YKR057W, YPL131W, YPL013C, YLR167W, YPR166C, YMR116C, YML063W, YBR048W, YBR282W, YIL069C, YMR142C, YJL136C, YML024W, YPL090C, YPL118W, YHR203C, YBL072C, YPL143W, YPL220W, YHR147C, YPR132W, YAL036C, YLR287C-A, YBR084C-A, YNL137C, YPR080W, YBR189W, YOR182C, YMR230W, YKL006W,…
GO:0030529	ribonucleoprotein complex	3.29672e-22	1.05664e-24	154	486	444	2927	0	0	YLR325C, YHL035C, YPL126W, YER102W, YBR079C, YIR005W, YOR234C, YKL074C, YBL087C, YBL092W, YER117W, YKR057W, YPL131W, YBL026W, YPL013C, YLR167W, YLR424W, YML063W, YBR048W, YBR282W, YIL069C, YPL217C, YMR142C, YNL209W, YJL136C, YML024W, YPL118W, YHR089C, YBL072C, YPL143W, YHR147C, YAL036C, YBR084C-A, YNL137C, YPR080W, YBR189W, YMR230W, YJR094W-A, YBR191W, YHR021C, YOR312C, YNL096C, YEL054C, YNL069C,…
GO:0022627	cytosolic small ribosomal subunit	5.1394e-22	1.64724e-24	40	486	48	2927	0	0	YNL096C, YOL121C, YER102W, YNL178W, YKR057W, YLR167W, YHL015W, YLR367W, YMR116C, YLR264W, YML063W, YBR048W, YOR369C, YIL069C, YOR096W, YBR181C, YER131W, YJR145C, YML026C, YOR167C, YJL136C, YLR333C, YML024W, YPL090C, YHR203C, YJR123W, YOR293W, YBL072C, YPR132W, YOL040C, YLR287C-A, YOR182C, YBR189W, YMR143W, YMR230W, YER074W, YKL156W, YJL191W, YNL302C, YHR021C
GO:0022625	cytosolic large ribosomal subunit	6.55235e-21	2.10011e-23	45	486	61	2927	0	0	YLR325C, YOR312C, YEL054C, YNL069C, YLR061W, YOL120C, YOR234C, YLR029C, YBL087C, YOL039W, YPL198W, YBL092W, YHL033C, YJL177W, YER117W, YPL131W, YHL001W, YNL162W, YNL301C, YIL018W, YLR075W, YLR340W, YBR031W, YHR010W, YMR142C, YKL180W, YNL067W, YKR094C, YPR102C, YHR141C, YPL220W, YPL143W, YPL249C-A, YMR242C, YBR084C-A, YML073C, YOR063W, YIL052C, YOL127W, YPR043W, YKL006W, YJR094W-A, YBL027W, YPL079…
GO:0015934	large ribosomal subunit	2.86454e-20	9.18121e-23	56	486	91	2927	0	0	YLR325C, YOR312C, YEL054C, YEL050C, YNL069C, YLR061W, YOL120C, YOR234C, YLR029C, YLR439W, YBL087C, YPL173W, YOL039W, YPL198W, YBL092W, YHL033C, YJL177W, YER117W, YPL131W, YHL001W, YNL005C, YNL284C, YNL162W, YNL301C, YIL018W, YLR075W, YLR340W, YBR031W, YHR010W, YBR282W, YMR142C, YKL180W, YNL067W, YKR094C, YPR102C, YHR141C, YPL220W, YPL143W, YHR147C, YPL249C-A, YMR242C, YNL252C, YBR084C-A, YML073C,…
GO:0032991	macromolecular complex	2.71039e-17	8.68715e-20	295	486	1230	2927	0	0	YLR325C, YPL046C, YER102W, YBR079C, YIR005W, YNL222W, YOR234C, YHR119W, YBL087C, YBL092W, YPL131W, YLR167W, YOR341W, YBR279W, YNL062C, YML063W, YBR048W, YHR001W-A, YPL217C, YOL018C, YMR142C, YOR303W, YHR107C, YJL136C, YML024W, YLR183C, YIL084C, YHR089C, YBL003C, YBL072C, YJL166W, YPL143W, YBR084C-A, YMR230W, YJR094W-A, YOR098C, YJR086W, YPL281C, YOL059W, YKR037C, YPL253C, YBR191W, YOR312C, YNL096…
GO:0015935	small ribosomal subunit	3.55361e-17	1.13898e-19	44	486	67	2927	0	0	YNL096C, YOL121C, YER102W, YNL178W, YKR057W, YPL013C, YLR167W, YPR166C, YHL015W, YLR367W, YMR116C, YLR264W, YML063W, YBR048W, YOR369C, YIL069C, YOR096W, YBR181C, YER131W, YJR145C, YML026C, YOR167C, YJL136C, YLR333C, YML024W, YPL090C, YPL118W, YHR203C, YJR123W, YOR293W, YBL072C, YPR132W, YOL040C, YLR287C-A, YNL137C, YOR182C, YBR189W, YMR143W, YMR230W, YER074W, YKL156W, YJL191W, YNL302C, YHR021C
GO:0043228	non-membrane-bounded organelle	5.86891e-16	1.88106e-18	208	486	768	2927	0	0	YLR325C, YHL035C, YPL126W, YER102W, YBR079C, YOR234C, YHR119W, YBL087C, YBL092W, YER117W, YKR057W, YPL131W, YBL026W, YPL013C, YLR167W, YOR341W, YLR383W, YBR279W, YML063W, YBR048W, YBR282W, YIL069C, YPL217C, YMR142C, YHR107C, YJL136C, YML024W, YPL118W, YLR183C, YIL084C, YHR089C, YBL003C, YBL072C, YPL143W, YHR147C, YOL145C, YAL036C, YBR084C-A, YNL137C, YPR080W, YBR189W, YMR230W, YJR094W-A, YOL144W,…
GO:0043232	intracellular non-membrane-bounded organelle	5.86891e-16	1.88106e-18	208	486	768	2927	0	0	YLR325C, YHL035C, YPL126W, YER102W, YBR079C, YOR234C, YHR119W, YBL087C, YBL092W, YER117W, YKR057W, YPL131W, YBL026W, YPL013C, YLR167W, YOR341W, YLR383W, YBR279W, YML063W, YBR048W, YBR282W, YIL069C, YPL217C, YMR142C, YHR107C, YJL136C, YML024W, YPL118W, YLR183C, YIL084C, YHR089C, YBL003C, YBL072C, YPL143W, YHR147C, YOL145C, YAL036C, YBR084C-A, YNL137C, YPR080W, YBR189W, YMR230W, YJR094W-A, YOL144W,…
GO:0005829	cytosol	3.89579e-12	1.24865e-14	111	486	344	2927	0	0	YLR325C, YHL025W, YNL068C, YLR061W, YER102W, YOL120C, YOR234C, YBL087C, YOL039W, YPL198W, YBL092W, YHL033C, YER117W, YKR057W, YPL131W, YLR167W, YPL111W, YMR120C, YMR116C, YML063W, YBR048W, YOL126C, YIL069C, YOL055C, YMR142C, YLR360W, YJL136C, YML024W, YPL090C, YIL084C, YHR203C, YBL072C, YPL143W, YPL220W, YPR132W, YOL094C, YLR287C-A, YBR084C-A, YBR189W, YOR182C, YMR230W, YKL006W, YJR094W-A, YNR010…
GO:0044422	organelle part	1.70469e-05	5.46374e-08	312	486	1557	2927	0	0	YLR325C, YNL111C, YPL046C, YER102W, YIR005W, YNL222W, YOR234C, YHR119W, YBL087C, YBL092W, YPL131W, YLR167W, YOR341W, YBR279W, YNL115C, YML063W, YBR048W, YHR001W-A, YPL217C, YOL018C, YOL158C, YMR142C, YHR107C, YJL136C, YML024W, YLR183C, YIL084C, YHR089C, YBL003C, YBL072C, YJL166W, YPL143W, YBR084C-A, YMR230W, YJR094W-A, YOR098C, YKR037C, YPL253C, YBR191W, YPL186C, YOR312C, YNL096C, YOL121C, YPR103…
GO:0044446	intracellular organelle part	1.70469e-05	5.46374e-08	312	486	1557	2927	0	0	YLR325C, YNL111C, YPL046C, YER102W, YIR005W, YNL222W, YOR234C, YHR119W, YBL087C, YBL092W, YPL131W, YLR167W, YOR341W, YBR279W, YNL115C, YML063W, YBR048W, YHR001W-A, YPL217C, YOL018C, YOL158C, YMR142C, YHR107C, YJL136C, YML024W, YLR183C, YIL084C, YHR089C, YBL003C, YBL072C, YJL166W, YPL143W, YBR084C-A, YMR230W, YJR094W-A, YOR098C, YKR037C, YPL253C, YBR191W, YPL186C, YOR312C, YNL096C, YOL121C, YPR103…
GO:0005732	small nucleolar ribonucleoprotein complex	0.000492017	1.57698e-06	13	486	20	2927	0	0	YNL221C, YER146W, YBR257W, YER127W, YAL033W, YBR167C, YHR072W-A, YLR175W, YOR310C, YEL026W, YHR089C, YER112W, YBL026W
GO:0030686	90S preribosome	0.00368676	1.18165e-05	25	486	64	2927	0	0	YOR145C, YJR145C, YNL096C, YPL126W, YJR002W, YER102W, YNL178W, YPL090C, YHR148W, YOR310C, YHR203C, YJR123W, YBL072C, YPR144C, YBR189W, YMR093W, YMR143W, YLR340W, YOR206W, YLR175W, YMR049C, YML063W, YBR048W, YOR096W, YPL217C
