# Supplementary material for: Quantitative proteomic analysis reveals posttranslational responses to aneuploidy in yeast
Source: eLife journal article supplement (doi:10.7554/elife.03023), 2014-07-29
Supplement: supp [file elife-03023-supp-v1.zip › elife_poa_e03023_Figure_3_source_data_1.xlsx]

## Sheet: Sheet1
Table S3	Ribosomal footprinting and SILAC Proteomics of Disome V relative to wild-type cells
# Feature	gene symbol	WT TRL	D5 TRL	wt mRNA	d5 mRNA	WT(FP)	D5(FP)	TRL logD5/WT	mRNA logD5/WT	FP logD5/WT	SILAC
Q0045	COX1	1.79	1.67	3.1	10.3	10.7203	32.7761	-0.12	1.7323	1.6123	-0.407703
Q0055	AI2	0.78	0.76	14.3	23.6	24.555	39.9664	-0.02	0.722772	0.702772	0.055031
Q0065	AI4	0.89	0.79	38.2	59.7	70.7913	103.226	-0.1	0.644158	0.544158	-0.23404
YAL001C	TFC3	0.18	0.26	31.3	36.9	35.4593	44.187	0.08	0.237458	0.317458	0.404177
YAL002W	VPS8	0.1	0.33	9.1	9.6	9.75314	12.0673	0.23	0.0771679	0.307168	-0.008294
YAL003W	EFB1	0.22	0.15	3109.4	2289	3621.62	2539.8	-0.07	-0.441919	-0.511919	-0.254771
YAL005C	SSA1	0.16	0.03	147.3	146.8	164.576	149.885	-0.13	-0.00490546	-0.134905	-0.286392
YAL007C	ERP2	0	0.06	309.5	240	309.5	250.192	0.06	-0.366905	-0.306905	-0.288538
YAL011W	SWC3	-0.03	0.16	15	16	14.6913	17.8766	0.19	0.0931094	0.283109	0.008068
YAL012W	CYS3	0.18	0.02	148.6	181.8	168.347	184.338	-0.16	0.290918	0.130918	0.077859
YAL013W	DEP1	-0.01	0.05	38.2	36.6	37.9361	37.8907	0.06	-0.061729	-0.00172899	-0.034331
YAL014C	SYN8	-0.11	-0.05	59.5	66.2	55.132	63.945	0.06	0.153942	0.213942	-0.02875
YAL015C	NTG1	-0.11	-0.21	47.8	74.8	44.2909	64.6674	-0.1	0.646028	0.546028	0.562376
YAL016W	TPD3	0.14	0.21	159.7	156.7	175.974	181.253	0.07	-0.0273591	0.0426409	0.06761
YAL017W	PSK1	0.07	0.2	26.5	25	27.8175	28.7175	0.13	-0.0840643	0.0459357	-0.31727
YAL019W	FUN30	0.22	0.21	33	34	38.4362	39.3274	-0.01	0.0430687	0.0330687	-0.027748
YAL021C	CCR4	0.14	-0.06	27.7	30.1	30.5228	28.8738	-0.2	0.119878	-0.0801225	-0.06777
YAL023C	PMT2	0.04	-0.06	107.6	83.6	110.625	80.1945	-0.1	-0.364103	-0.464103	-0.267342
YAL024C	LTE1	0.15	0.27	9.4	9.3	10.43	11.214	0.12	-0.01543	0.10457	-0.036321
YAL025C	MAK16	-0.01	0.09	183.6	170.5	182.332	181.475	0.1	-0.106794	-0.00679432	-0.111668
YAL026C	DRS2	0.11	0.22	38.5	81.9	41.5503	95.3917	0.11	1.08901	1.19901	0.451331
YAL029C	MYO4	0.11	0.21	46.9	45.4	50.6158	52.5136	0.1	-0.0468956	0.0531044	-0.173653
YAL030W	SNC1	0.17	0.41	80	60.4	90.0047	80.2526	0.24	-0.405451	-0.165451	-0.771732
YAL031C	GIP4	0.14	-0.05	16.2	17.1	17.8509	16.5175	-0.19	0.0780025	-0.111997	-0.209373
YAL032C	PRP45	0.09	0.11	29.9	33.1	31.8247	35.7225	0.02	0.146686	0.166686	-0.066627
YAL033W	POP5	-0.19	-0.23	117.4	163.8	102.914	139.662	-0.04	0.480503	0.440503	0.124221
YAL034W-A	MTW1	0.07	0.2	33.2	31.2	34.8506	35.8394	0.13	-0.0896372	0.0403628	-0.049276
YAL035W	FUN12	0.09	0.26	189	154.9	201.166	185.489	0.17	-0.287049	-0.117049	-0.083834
YAL036C	RBG1	0.07	0.12	153.2	145.8	160.817	158.446	0.05	-0.0714256	-0.0214256	0.080999
YAL038W	CDC19	0.17	0.01	3579	3183.3	4026.58	3205.44	-0.16	-0.169033	-0.329033	-0.223199
YAL039C	CYC3	-0.19	-0.34	110.4	104.9	96.7773	82.8753	-0.15	-0.0737255	-0.223725	0.099875
YAL041W	CDC24	0.2	0.05	33	36.4	37.907	37.6836	-0.15	0.141472	-0.00852757	0.009407
YAL042W	ERV46	-0.19	-0.36	321.4	339.3	281.741	264.371	-0.17	0.0781915	-0.0918085	0.029252
YAL043C	PTA1	0.25	0.03	23.5	26.7	27.9464	27.261	-0.22	0.184179	-0.035821	0.100744
YAL044C	GCV3	-0.32	-0.28	435.2	800.1	348.626	658.955	0.04	0.878502	0.918502	1.02742
YAL044W-A	YAL044W-A	-0.47	-0.26	151.8	142.5	109.594	119	0.21	-0.0912099	0.11879	0.161836
YAL046C	AIM1	0.14	-0.05	90.7	96.9	99.9428	93.5992	-0.19	0.0953941	-0.0946059	0.165845
YAL047C	SPC72	0.37	0.02	10.9	13.6	14.0866	13.7898	-0.35	0.319279	-0.0307215	-0.058414
YAL048C	GEM1	0.2	0.11	14.3	22.1	16.4264	23.8509	-0.09	0.628031	0.538031	0.273476
YAL049C	AIM2	-0.05	-0.05	157	145.6	151.652	140.64	0	-0.108754	-0.108754	-0.542425
YAL051W	OAF1	0.28	0.27	11.4	13.8	13.8418	16.6401	-0.01	0.275634	0.265634	0.057766
YAL053W	FLC2	0.1	-0.08	59.7	54.2	63.9849	51.2763	-0.18	-0.139438	-0.319438	-0.282583
YAL056W	GPB2	0.01	0.15	57.4	62.3	57.7992	69.1262	0.14	0.118181	0.258181	0.106843
YAL058W	CNE1	-0.1	0.12	42.2	42.2	39.374	45.8602	0.22	0	0.22	-0.315492
YAL059W	ECM1	-0.05	-0.09	125.2	128.1	120.935	120.353	-0.04	0.0330359	-0.00696409	-0.3399
YAL060W	BDH1	0	-0.03	192.2	240.8	192.2	235.844	-0.03	0.325227	0.295227	0.349412
YAL062W	GDH3	-0.14	-1.05	5	4.2	4.5376	2.02847	-0.91	-0.251539	-1.16154	-0.274272
YAR002C-A	ERP1	-0.09	0.04	423.8	379.8	398.17	390.478	0.13	-0.158144	-0.0281437	-0.232091
YAR002W	NUP60	-0.06	-0.12	59.2	53.8	56.7884	49.5061	-0.06	-0.137991	-0.197991	-0.055831
YAR007C	RFA1	0.04	0.1	100.1	82.6	102.914	88.5285	0.06	-0.277228	-0.217228	-0.074078
YAR008W	SEN34	-0.03	0.06	75.2	74.1	73.6524	77.2467	0.09	-0.0212591	0.0687409	-1.53137
YAR014C	BUD14	-0.02	0.07	58.5	66.9	57.6946	70.226	0.09	0.19357	0.28357	0.091
YAR015W	ADE1	n/a	0.32	0.7	440.5		549.89		9.29757		2.86598
YAR018C	KIN3	0.14	0.08	30.6	27.4	33.7183	28.9623	-0.06	-0.159356	-0.219356	-0.125043
YAR019C	CDC15	0.13	0.23	6	7.2	6.56576	8.44441	0.1	0.263034	0.363034	0.16726
YAR027W	UIP3	0.01	-0.04	123.6	121.9	124.46	118.567	-0.05	-0.0199806	-0.0699806	1.70354
YAR028W	YAR028W	0.05	-0.05	42.4	41.2	43.8952	39.7966	-0.1	-0.0414199	-0.14142	-0.666939
YAR031W	PRM9	n/a	-0.03	3.5	3.3		3.23209		-0.0848889		0.139534
YAR035W	YAT1	n/a	0.25	1.3	2.1		2.49733		0.691878		0.565212
YAR042W	SWH1	0.21	0.25	15.8	14	18.2757	16.6489	0.04	-0.174498	-0.134498	-0.049391
YAR071W	PHO11	-0.07	-0.34	55.3	43.9	52.6809	34.6828	-0.27	-0.333059	-0.603059	-0.408238
YBL002W	HTB2	-0.04	0.05	695.1	687.2	676.092	711.434	0.09	-0.0164905	0.0735095	0.022575
YBL003C	HTA2	-0.14	-0.19	2532.8	2559.8	2298.56	2243.94	-0.05	0.0152979	-0.0347021	0.029021
YBL004W	UTP20	0.18	0.2	29.2	34.5	33.0802	39.6301	0.02	0.240628	0.260628	-0.030814
YBL006C	LDB7	-0.29	-0.17	196.1	244.3	160.391	217.144	0.12	0.317064	0.437064	0.02986
YBL007C	SLA1	0.15	0.02	47.5	52.1	52.7045	52.8273	-0.13	0.133356	0.00335586	0.215037
YBL008W	HIR1	0.11	0.15	21.9	23.2	23.6351	25.742	0.04	0.0831939	0.123194	-0.157275
YBL010C	YBL010C	-0.09	-0.02	44.5	41.5	41.8088	40.9287	0.07	-0.100694	-0.030694	-0.161787
YBL011W	SCT1	0.2	0.3	30.5	29.8	35.0353	36.6881	0.1	-0.0334969	0.0665031	-0.048086
YBL015W	ACH1	-0.09	-0.35	31.3	24.6	29.4071	19.3008	-0.26	-0.347504	-0.607504	-1.21773
YBL016W	FUS3	0.03	-0.1	90.4	90.5	92.2995	84.4395	-0.13	0.00159502	-0.128405	0.010714
YBL017C	PEP1	0.1	0.16	41.3	39.3	44.2642	43.9094	0.06	-0.0716125	-0.0116125	-0.079107
YBL018C	POP8	0.23	0.16	113.8	156.2	133.469	174.52	-0.07	0.456894	0.386894	0.141146
YBL022C	PIM1	0.08	0.05	55.4	50.7	58.5588	52.4879	-0.03	-0.1279	-0.1579	-0.056724
YBL023C	MCM2	0.08	0.17	33.9	30.8	35.8329	34.6518	0.09	-0.138355	-0.0483549	-0.084524
YBL024W	NCL1	-0.02	0.1	128.9	112.8	127.125	120.896	0.12	-0.192485	-0.0724852	-0.017302
YBL026W	LSM2	0.18	0.37	197.5	182.1	223.745	235.337	0.19	-0.117122	0.0728783	0.084734
YBL027W	RPL19B	0.02	0.14	3809.1	2876.4	3862.27	3169.52	0.12	-0.405186	-0.285186	-0.287714
YBL028C	YBL028C	-0.17	-0.01	330.9	353.2	294.118	350.76	0.16	0.0940901	0.25409	-0.439859
YBL029C-A	YBL029C-A	-0.1	-0.05	92.1	86.1	85.9323	83.1671	0.05	-0.0971879	-0.0471879	-0.072435
YBL030C	PET9	0.03	0.05	365.7	309.3	373.384	320.207	0.02	-0.241654	-0.221654	-0.253613
YBL032W	HEK2	-0.05	0.01	73.1	65.3	70.6099	65.7542	0.06	-0.162788	-0.102788	0.010207
YBL033C	RIB1	0.24	0.15	107.5	143.1	126.957	158.779	-0.09	0.412687	0.322687	0.607669
YBL034C	STU1	0.23	0.31	8.9	9.1	10.4382	11.2813	0.08	0.0320612	0.112061	-0.143634
YBL035C	POL12	0.2	0.19	18.9	19.5	21.7104	22.2449	-0.01	0.0450879	0.0350879	-0.04875
YBL036C	YBL036C	-0.1	-0.06	199.3	218.8	185.953	209.887	0.04	0.134671	0.174671	0.036601
YBL037W	APL3	0.24	0.17	13.8	16.4	16.2977	18.451	-0.07	0.249028	0.179028	0.375813
YBL038W	MRPL16	-0.13	-0.1	189.1	190.3	172.806	177.556	0.03	0.0091262	0.0391262	0.111387
YBL039C	URA7	0.13	0.09	256.4	232.5	280.577	247.466	-0.04	-0.141166	-0.181166	-0.219031
YBL041W	PRE7	0	0.04	257.2	206.5	257.2	212.306	0.04	-0.316749	-0.276749	-0.076118
YBL042C	FUI1	-0.03	-0.08	106.2	69.2	104.014	65.4672	-0.05	-0.61794	-0.66794	-0.759983
YBL045C	COR1	-0.07	-0.27	164.5	147.8	156.709	122.573	-0.2	-0.154441	-0.354441	-0.143173
YBL046W	PSY4	0.06	0.26	44.4	41	46.2855	49.0966	0.2	-0.114936	0.0850642	0.02234
YBL047C	EDE1	0.09	0	48.8	52.4	51.9413	52.4	-0.09	0.102686	0.0126857	0.186683
YBL050W	SEC17	-0.04	0.17	229.2	226.3	222.933	254.601	0.21	-0.0183705	0.19163	0.052152
YBL051C	PIN4	0.2	0.24	27.3	27.7	31.3595	32.7135	0.04	0.020985	0.060985	-0.135497
YBL054W	TOD6	0.22	0.17	22.2	25.5	25.8571	28.689	-0.05	0.199938	0.149938	-0.448318
YBL055C	YBL055C	0	-0.09	77.3	88.1	77.3	82.772	-0.09	0.188674	0.0986736	-0.008723
YBL056W	PTC3	-0.06	0.09	282.5	260.4	270.992	277.162	0.15	-0.117521	0.0324786	0.073383
YBL057C	PTH2	-0.08	-0.09	179.5	179.4	169.817	168.55	-0.01	-0.000803954	-0.010804	0.127584
YBL058W	SHP1	0.07	0.14	194.9	154.3	204.59	170.024	0.07	-0.336996	-0.266996	-0.086785
YBL059C-A	CMC2	-0.11	-0.12	119.6	116.3	110.82	107.018	-0.01	-0.0403663	-0.0503663	0.306995
YBL059W	YBL059W	0.23	0.29	26.6	26.8	31.1974	32.7668	0.06	0.0108068	0.0708068	0.147225
YBL061C	SKT5	0.22	0.25	78.6	70.8	91.5481	84.1959	0.03	-0.15078	-0.12078	-0.036789
YBL064C	PRX1	0.09	0.01	83	65.1	88.3427	65.5528	-0.08	-0.350454	-0.430454	-0.897146
YBL066C	SEF1	0.26	0.25	5.2	6.2	6.22689	7.37308	-0.01	0.253757	0.243757	0.197124
YBL067C	UBP13	0.14	0.31	36.5	40	40.2195	49.5883	0.17	0.132104	0.302104	0.165977
YBL068W	PRS4	0.08	0.1	137	131.3	144.811	140.724	0.02	-0.061309	-0.041309	-0.071802
YBL069W	AST1	-0.2	0.01	25.3	24.6	22.0249	24.7711	0.21	-0.0404791	0.169521	-0.28343
YBL072C	RPS8A	-0.27	-0.23	1690.5	1268.3	1401.96	1081.4	0.04	-0.414554	-0.374554	-0.237416
YBL074C	AAR2	-0.05	0.5	12	11.8	11.5912	16.6877	0.55	-0.0242475	0.525752	0.121131
YBL075C	SSA3	0.02	0.32	18.4	19.8	18.6569	24.7169	0.3	0.105795	0.405795	-2.96893
YBL076C	ILS1	0.14	0.17	338.9	351.7	373.436	395.683	0.03	0.0534857	0.0834857	-0.062816
YBL078C	ATG8	-0.07	0.34	71.4	72.5	68.0184	91.7674	0.41	0.0220569	0.432057	0.16811
YBL079W	NUP170	0.18	0.24	30.7	32.5	34.7795	38.3823	0.06	0.0822011	0.142201	-0.034966
YBL080C	PET112	-0.13	-0.25	25.2	28.7	23.0286	24.1337	-0.12	0.187627	0.067627	0.317226
YBL084C	CDC27	0.15	0.21	17.7	19.6	19.6394	22.6711	0.06	0.147104	0.207104	-0.107795
YBL085W	BOI1	0.03	0.04	33	31.7	33.6934	32.5912	0.01	-0.0579832	-0.0479832	-0.125564
YBL086C	YBL086C	0.07	0.13	36	37.7	37.7898	41.2549	0.06	0.0665676	0.126568	-0.055452
YBL087C	RPL23A	-0.24	-0.37	2877.5	2402.5	2436.51	1859.01	-0.13	-0.260279	-0.390279	-0.258249
YBL088C	TEL1	0.39	0.37	5.2	6.7	6.81405	8.65876	-0.02	0.365649	0.345649	-0.519986
YBL090W	MRP21	-0.19	0.04	146.5	139	128.423	142.908	0.23	-0.0758158	0.154184	0.039817
YBL091C	MAP2	0.15	0.34	124	98	137.587	124.044	0.19	-0.339486	-0.149486	-0.029941
YBL092W	RPL32	-0.04	-0.17	4695.6	3651.6	4567.2	3245.7	-0.13	-0.362781	-0.492781	-0.282381
YBL095W	YBL095W	-0.07	-0.02	73.3	66.8	69.8284	65.8803	0.05	-0.133965	-0.0839651	-0.466409
YBL097W	BRN1	0.18	0.41	16	15	18.1261	19.9303	0.23	-0.0931094	0.136891	-0.035076
YBL098W	BNA4	0.06	0.02	96.2	111.5	100.285	113.056	-0.04	0.212935	0.172935	0.05757
YBL099W	ATP1	0.1	0.11	272.3	225.8	291.844	243.69	0.01	-0.270151	-0.260151	-0.383086
YBL101C	ECM21	0.23	0.14	10	13	11.7283	14.3248	-0.09	0.378512	0.288512	-0.064971
YBL103C	RTG3	0.02	0.05	48.3	64.6	48.9742	66.8781	0.03	0.419511	0.449511	-0.129129
YBL104C	YBL104C	0.14	0.11	19.3	23.1	21.2668	24.9302	-0.03	0.259292	0.229292	0.251629
YBL105C	PKC1	0.13	0.17	26.9	29.7	29.4365	33.4142	0.04	0.142857	0.182857	-0.006478
YBL107C	YBL107C	-0.17	-0.1	146.4	120.7	130.127	112.617	0.07	-0.27849	-0.20849	-0.238375
YBL113C	YBL113C	-0.37	-0.43	87.8	70.4	67.9381	52.2552	-0.06	-0.318646	-0.378646	-0.79391
YBR001C	NTH2	0.24	0.44	21.2	20.2	25.037	27.4034	0.2	-0.069709	0.130291	-0.208781
YBR002C	RER2	0.15	0.3	83	78.1	92.0943	96.1524	0.15	-0.0877888	0.0622112	-0.121046
YBR003W	COQ1	0.13	0.12	55.6	47.4	60.8427	51.5112	-0.01	-0.230198	-0.240198	0.007227
YBR006W	UGA2	-0.03	-0.09	47.8	42	46.8163	39.46	-0.06	-0.186621	-0.246621	-0.985464
YBR007C	DSF2	0.12	0.27	23	29.1	24.9949	35.089	0.15	0.339385	0.489385	-0.020266
YBR009C	HHF1	-0.25	-0.17	1924.3	1923.6	1618.14	1709.78	0.08	-0.000524903	0.0794751	0.020795
YBR011C	IPP1	0.17	0.13	549.4	447.2	618.107	489.368	-0.04	-0.296937	-0.336937	-0.381826
YBR014C	GRX7	-0.18	-0.03	189.2	139.5	167.007	136.629	0.15	-0.439647	-0.289647	-0.46428
YBR015C	MNN2	0.23	0.21	74.5	69.9	87.3762	80.8525	-0.02	-0.091948	-0.111948	-0.181727
YBR017C	KAP104	0.26	0.42	64.9	60.8	77.7164	81.346	0.16	-0.0941472	0.0658528	0.083148
YBR022W	POA1	-0.06	-0.21	72.5	90.1	69.5466	77.8948	-0.15	0.313546	0.163546	0.316947
YBR023C	CHS3	0.05	0.05	55.3	56.6	57.2502	58.596	0	0.0335226	0.0335226	-0.18713
YBR024W	SCO2	-0.1	-0.03	39.7	33.5	37.0414	32.8106	0.07	-0.244978	-0.174978	-0.08468
YBR025C	OLA1	-0.09	-0.15	591	455.3	555.258	410.339	-0.06	-0.376341	-0.436341	-0.200201
YBR026C	ETR1	0.18	0.19	79	63.5	89.4978	72.4385	0.01	-0.315096	-0.305096	-0.403695
YBR028C	YBR028C	0.23	0.26	64.3	66.4	75.4133	79.5126	0.03	0.0463645	0.0763645	0.040329
YBR029C	CDS1	0.04	0.04	106.8	106.3	109.803	109.288	0	-0.00677005	-0.00677005	0.117462
YBR030W	RKM3	0.09	0.25	60.4	67.1	64.288	79.7958	0.16	0.151764	0.311764	0.198717
YBR031W	RPL4A	-0.16	-0.17	670.7	532.4	600.293	473.22	-0.01	-0.333157	-0.343157	-0.405913
YBR034C	HMT1	0.01	0.02	205.1	188	206.527	190.624	0.01	-0.125595	-0.115595	-0.133134
YBR035C	PDX3	-0.07	-0.05	310.2	346.4	295.508	334.6	0.02	0.15924	0.17924	0.190582
YBR037C	SCO1	-0.17	-0.35	38.1	43.7	33.8649	34.2863	-0.18	0.197842	0.0178423	0.170426
YBR038W	CHS2	0.02	0.05	24.6	24.7	24.9434	25.571	0.03	0.00585273	0.0358527	-0.048742
YBR039W	ATP3	-0.01	0.06	304.2	240.2	302.099	250.4	0.07	-0.340784	-0.270784	-0.286893
YBR041W	FAT1	0.18	0.32	64	59.7	72.5046	74.5253	0.14	-0.100341	0.039659	0.031571
YBR042C	CST26	-0.03	0.14	86.9	82	85.1116	90.3562	0.17	-0.0837323	0.0862677	-0.01217
YBR044C	TCM62	-0.16	-0.06	38.9	36	34.8165	34.5335	0.1	-0.111773	-0.0117732	-0.242359
YBR046C	ZTA1	-0.03	0.15	63.3	85.8	61.9973	95.2011	0.18	0.438772	0.618772	0.503689
YBR048W	RPS11B	0.07	0.13	1245.6	964.8	1307.53	1055.77	0.06	-0.368539	-0.308539	-0.282086
YBR049C	REB1	0.38	0.31	46.4	41.2	60.3823	51.076	-0.07	-0.17148	-0.24148	-0.151452
YBR052C	RFS1	-0.18	-0.03	198	124.2	174.775	121.644	0.15	-0.672835	-0.522835	-0.365267
YBR053C	YBR053C	-0.24	-0.05	83.6	65.8	70.7879	63.5586	0.19	-0.345415	-0.155415	-0.605487
YBR054W	YRO2	-0.15	-0.3	56.5	5.8	50.9207	4.71106	-0.15	-3.28413	-3.43413	-1.20189
YBR055C	PRP6	0.32	0.44	26.1	25.5	32.5814	34.5934	0.12	-0.0335526	0.0864474	-0.136665
YBR056W	YBR056W	0.08	0.16	88.9	72	93.9689	80.4447	0.08	-0.304187	-0.224187	-0.329263
YBR057C	MUM2	-0.18	-0.07	53.7	52.4	47.4012	49.9182	0.11	-0.0353553	0.0746447	-0.09734
YBR058C	UBP14	0.04	0.1	37.1	39.8	38.143	42.6566	0.06	0.101349	0.161349	0.132475
YBR058C-A	TSC3	-0.26	-0.08	427.7	636.8	357.167	602.45	0.18	0.574241	0.754241	0.174487
YBR059C	AKL1	0.19	0.21	26.7	27.2	30.4584	31.4619	0.02	0.0267669	0.0467669	0.126838
YBR060C	ORC2	0.2	0.26	25.1	24.8	28.8323	29.6975	0.06	-0.0173472	0.0426528	0.373381
YBR061C	TRM7	0.11	-0.03	68.4	81.9	73.8192	80.2145	-0.14	0.259867	0.119867	0.149553
YBR065C	ECM2	0.24	0.34	29.7	26.7	35.0755	33.7957	0.1	-0.153623	-0.0536232	-0.074565
YBR068C	BAP2	0.06	0.07	259.9	399.8	270.937	419.677	0.01	0.621322	0.631322	0.564059
YBR069C	TAT1	-0.05	-0.15	131.7	136.2	127.214	122.75	-0.1	0.0484714	-0.0515286	-0.186662
YBR071W	YBR071W	-0.05	-0.23	84.8	82.9	81.9114	70.6834	-0.18	-0.0326922	-0.212692	-0.704426
YBR072W	HSP26	-0.06	0.23	16.9	23.7	16.2116	27.7962	0.29	0.487864	0.777864	-1.34332
YBR073W	RDH54	0.14	0.23	64.2	59.1	70.7423	69.3145	0.09	-0.119415	-0.0294152	-0.399297
YBR074W	YBR074W	0.09	0.16	48.1	58.6	51.1962	65.473	0.07	0.284864	0.354864	-0.348877
YBR077C	SLM4	0.03	0.04	115.3	113.9	117.723	117.102	0.01	-0.0176248	-0.00762477	0.024281
YBR078W	ECM33	0.27	0.01	529.6	575.5	638.596	579.503	-0.26	0.119913	-0.140087	0.313956
YBR079C	RPG1	0.21	0.28	157.1	140.3	181.716	170.352	0.07	-0.163168	-0.0931682	-0.223696
YBR080C	SEC18	0.19	0.32	56.7	58.2	64.6813	72.6528	0.13	0.0376704	0.16767	0.097204
YBR081C	SPT7	0.28	0.32	24.6	36	29.8692	44.9399	0.04	0.549339	0.589339	0.121368
YBR082C	UBC4	-0.1	-0.05	682.8	664.7	637.075	642.058	0.05	-0.0387597	0.0112403	-0.172665
YBR083W	TEC1	0.17	0.32	28.3	26.3	31.8392	32.8311	0.15	-0.105739	0.0442607	0.135481
YBR084C-A	RPL19A	0.07	0.12	2766.7	2101.2	2904.25	2283.45	0.05	-0.396953	-0.346953	-0.282523
YBR084W	MIS1	0.13	0	123.1	120.9	134.708	120.9	-0.13	-0.0260165	-0.156017	-0.102365
YBR085C-A	YBR085C-A	-0.33	-0.24	790	709.3	628.474	600.596	0.09	-0.155457	-0.0654567	-0.298348
YBR085W	AAC3	0.15	-0.03	12.2	11.2	13.5367	10.9695	-0.18	-0.123382	-0.303382	-0.233477
YBR086C	IST2	0.2	0.21	51.6	47.8	59.2728	55.2897	0.01	-0.11036	-0.10036	-0.222695
YBR087W	RFC5	-0.04	0.03	143.8	144.8	139.868	147.843	0.07	0.00999793	0.0799979	-0.02605
YBR088C	POL30	0.25	0.32	234	184.9	278.274	230.816	0.07	-0.339763	-0.269763	-0.396108
YBR092C	PHO3	-0.14	-0.31	133.9	74.6	121.517	60.1755	-0.17	-0.843908	-1.01391	-1.07842
YBR093C	PHO5	0.01	-0.19	328.3	157.6	330.584	138.153	-0.2	-1.05875	-1.25875	-1.33225
YBR094W	PBY1	0.2	0.24	35.5	31.2	40.7788	36.847	0.04	-0.186273	-0.146273	-0.216781
YBR095C	RXT2	0.09	0.16	45.2	45.1	48.1095	50.3896	0.07	-0.00319534	0.0668047	-0.038743
YBR096W	YBR096W	-0.08	-0.09	175.1	220.1	165.655	206.789	-0.01	0.32998	0.31998	0.533893
YBR097W	VPS15	0.27	0.28	11.3	10.5	13.6256	12.749	0.01	-0.105933	-0.0959334	-0.181261
YBR101C	FES1	0	0.09	267.3	352.9	267.3	375.616	0.09	0.4008	0.4908	0.319548
YBR102C	EXO84	0.06	0.27	23	25.2	23.9767	30.3864	0.21	0.13179	0.34179	0.193852
YBR103W	SIF2	0.01	0.13	72.3	77.9	72.8029	85.2455	0.12	0.107628	0.227628	0.15583
YBR104W	YMC2	-0.16	-0.17	216.7	296.1	193.952	263.186	-0.01	0.450385	0.440385	0.593697
YBR106W	PHO88	-0.06	-0.19	1497	1206.1	1436.02	1057.27	-0.13	-0.311725	-0.441725	-0.248982
YBR108W	AIM3	0.31	0.15	6.7	8.3	8.30604	9.20943	-0.16	0.30895	0.14895	-0.039473
YBR109C	CMD1	0.1	0.28	534.7	515	573.077	625.31	0.18	-0.0541572	0.125843	-0.064398
YBR110W	ALG1	0.09	0.14	97.2	87.9	103.457	96.8575	0.05	-0.145093	-0.0950931	0.015287
YBR111C	YSA1	-0.19	-0.19	397.2	370.4	348.188	324.695	0	-0.100782	-0.100782	-0.07996
YBR111W-A	SUS1	-0.12	-0.09	111.2	106	102.325	99.5894	0.03	-0.0690925	-0.0390925	-0.038429
YBR112C	CYC8	0.26	0.25	24.2	23.2	28.979	27.5896	-0.01	-0.0608822	-0.0708822	-0.204665
YBR114W	RAD16	0.36	-0.04	8.9	9.9	11.4225	9.62928	-0.4	0.153623	-0.246377	0.066921
YBR118W	TEF2	0.02	0.09	728.4	568.4	738.568	604.988	0.07	-0.357824	-0.287824	-0.265653
YBR119W	MUD1	-0.01	-0.22	38.4	45.4	38.1348	38.9789	-0.21	0.241586	0.031586	0.045741
YBR120C	CBP6	0.1	0.39	71.2	61.6	76.3103	80.7202	0.29	-0.208947	0.0810531	0.049734
YBR121C	GRS1	0.17	0.19	473.4	413.7	532.603	471.934	0.02	-0.194475	-0.174475	-0.128275
YBR122C	MRPL36	-0.26	-0.13	229.3	215.2	191.486	196.657	0.13	-0.0915583	0.0384417	0.011697
YBR123C	TFC1	0.01	0.23	32.5	34.7	32.7261	40.6974	0.22	0.0944959	0.314496	-0.021819
YBR125C	PTC4	0.01	-0.14	52.5	57.7	52.8652	52.3639	-0.15	0.136254	-0.0137461	0.346227
YBR126C	TPS1	0.05	-0.01	128.4	105.4	132.928	104.672	-0.06	-0.28477	-0.34477	-0.343143
YBR127C	VMA2	-0.12	-0.18	485.1	447.3	446.383	394.833	-0.06	-0.117039	-0.177039	-0.026892
YBR129C	OPY1	-0.02	0.02	87.4	99.5	86.1967	100.889	0.04	0.187063	0.227063	0.29578
YBR130C	SHE3	0.09	0.28	50	52	53.2185	63.1381	0.19	0.0565835	0.246584	0.14034
YBR131W	CCZ1	0.14	0.29	12.3	15.2	13.5534	18.5841	0.15	0.305413	0.455413	0.249906
YBR133C	HSL7	0.04	-0.1	32.4	37.4	33.3109	34.8954	-0.14	0.207044	0.0670445	0.064599
YBR136W	MEC1	0.08	0.24	4.4	5.1	4.65088	6.02306	0.16	0.212994	0.372994	1.38456
YBR138C	YBR138C	0.11	0	32.9	34	35.5066	34	-0.11	0.0474472	-0.0625528	-0.242498
YBR139W	YBR139W	0.12	0.2	70	69.9	76.0714	80.294	0.08	-0.00206247	0.0779375	-0.012982
YBR140C	IRA1	0.11	0.04	12.4	14.7	13.3824	15.1133	-0.07	0.245476	0.175476	0.07135
YBR142W	MAK5	0.2	0.23	56.7	57.9	65.1312	67.9071	0.03	0.0302146	0.0602146	0.109234
YBR143C	SUP45	0.08	0.23	593.7	546.6	627.552	641.072	0.15	-0.119249	0.0307513	-0.038114
YBR145W	ADH5	-0.05	-0.01	220.4	380.2	212.892	377.574	0.04	0.786634	0.826634	1.29104
YBR146W	MRPS9	0.08	0.19	131.2	131.7	138.681	150.239	0.11	0.00548763	0.115488	0.159391
YBR149W	ARA1	0.01	-0.08	169.1	145.6	170.276	137.746	-0.09	-0.215866	-0.305866	-0.122487
YBR151W	APD1	-0.07	0.05	177.4	169.8	168.998	175.788	0.12	-0.0631696	0.0568304	-0.163871
YBR152W	SPP381	-0.07	0.12	15.9	15.3	15.1469	16.627	0.19	-0.0554951	0.134505	-0.201894
YBR153W	RIB7	-0.08	-0.11	72.4	84.2	68.4946	78.0187	-0.03	0.217831	0.187831	-0.076213
YBR154C	RPB5	-0.2	0.07	491.2	438.8	427.614	460.616	0.27	-0.162747	0.107253	-0.05243
YBR155W	CNS1	0.17	0.33	41.9	41.8	47.14	52.5432	0.16	-0.0034473	0.156553	-0.017439
YBR159W	IFA38	0.09	0.08	305.1	283.5	324.739	299.665	-0.01	-0.105933	-0.115933	-0.036314
YBR160W	CDC28	-0.05	-0.05	132.6	109.7	128.083	105.963	0	-0.273517	-0.273517	-0.276901
YBR162C	TOS1	0.09	-0.14	256.5	225.5	273.011	204.646	-0.23	-0.185831	-0.415831	0.109629
YBR164C	ARL1	-0.06	-0.01	349.3	346.5	335.071	344.107	0.05	-0.0116113	0.0383887	-0.264348
YBR166C	TYR1	0.23	0.28	122.4	157.9	143.555	191.721	0.05	0.367408	0.417408	0.479247
YBR169C	SSE2	-0.07	-0.07	14.3	16.3	13.6227	15.528	0	0.188857	0.188857	-0.696955
YBR170C	NPL4	0.08	0.15	49.3	47.4	52.111	52.5936	0.07	-0.0567006	0.0132994	0.023947
YBR171W	SEC66	0.07	0.28	242.7	229.3	254.766	278.415	0.21	-0.0819378	0.128062	0.091299
YBR172C	SMY2	0.23	0.3	43.6	41.1	51.1356	50.6	0.07	-0.0851897	-0.0151897	-0.226591
YBR173C	UMP1	0.04	-0.14	142.2	157.9	146.198	143.297	-0.18	0.15109	-0.0289103	0.519218
YBR176W	ECM31	0.12	0.07	54.9	64	59.6617	67.1819	-0.05	0.221266	0.171266	0.167117
YBR177C	EHT1	-0.02	-0.05	208.7	233.1	205.827	225.16	-0.03	0.159518	0.129518	0.343638
YBR179C	FZO1	-0.02	0	30.8	39.1	30.376	39.1	0.02	0.344238	0.364238	0.282427
YBR181C	RPS6B	-0.47	-0.42	1320.2	998.4	953.138	746.229	0.05	-0.403067	-0.353067	-0.294608
YBR185C	MBA1	-0.04	-0.14	50.9	51.4	49.5081	46.6465	-0.1	0.0141027	-0.0858973	0.136555
YBR187W	GDT1	-0.09	0	237.5	236.4	223.137	236.4	0.09	-0.00669748	0.0833025	-0.24838
YBR188C	NTC20	-0.04	-0.2	53.7	51.9	52.2316	45.1816	-0.16	-0.0491875	-0.209188	0.134278
YBR189W	RPS9B	-0.18	-0.14	6134.4	4718.8	5414.85	4282.4	0.04	-0.378502	-0.338502	-0.327965
YBR191W	RPL21A	-0.05	-0.1	3858.2	2853.3	3726.78	2662.22	-0.05	-0.435296	-0.485296	-0.283373
YBR192W	RIM2	-0.15	-0.04	78.3	71.8	70.5679	69.8366	0.11	-0.125028	-0.0150285	0.040553
YBR193C	MED8	-0.23	0.08	49.2	43.5	41.9496	45.9803	0.31	-0.177643	0.132357	-0.264244
YBR195C	MSI1	0.12	0.24	30.2	34.5	32.8194	40.7442	0.12	0.192048	0.312048	0.196699
YBR196C	PGI1	0.14	-0.13	955.5	821.9	1052.87	751.078	-0.27	-0.217293	-0.487293	-0.286867
YBR197C	YBR197C	0.06	0.09	32.6	33.7	33.9844	35.8693	0.03	0.0478766	0.0778766	0.042222
YBR198C	TAF5	0.18	0.28	26.8	26.6	30.3613	32.2976	0.1	-0.0108068	0.0891932	-0.012769
YBR199W	KTR4	-0.09	-0.07	213.4	226.4	200.494	215.677	0.02	0.0853138	0.105314	0.185631
YBR200W	BEM1	0.23	0.31	46.6	51.4	54.6541	63.721	0.08	0.141438	0.221438	0.193697
YBR202W	MCM7	0	0.05	33.2	31.7	33.2	32.8179	0.05	-0.0667004	-0.0167004	-0.06447
YBR204C	YBR204C	0.16	0.27	46.7	39	52.1773	47.0265	0.11	-0.259948	-0.149948	-0.245926
YBR205W	KTR3	-0.02	0.03	186.6	171	184.031	174.593	0.05	-0.125953	-0.0759527	-0.15128
YBR207W	FTH1	-0.05	0	132.4	107.7	127.89	107.7	0.05	-0.297885	-0.247885	0.057776
YBR208C	DUR1,2	0.17	0.13	15.4	38.9	17.3259	42.568	-0.04	1.33684	1.29684	1.15786
YBR212W	NGR1	0.15	0.17	22.3	30.5	24.7434	34.3143	0.02	0.451766	0.471766	0.269957
YBR213W	MET8	0.15	0.01	6.4	8.7	7.10124	8.76051	-0.14	0.442943	0.302943	0.492056
YBR214W	SDS24	0.08	0.04	17.6	17.2	18.6035	17.6836	-0.04	-0.0331669	-0.0731669	-0.290922
YBR215W	HPC2	-0.15	-0.13	29.8	30.6	26.8573	27.9632	0.02	0.0382193	0.0582193	-0.05732
YBR218C	PYC2	0.07	0.08	147.7	172.5	155.043	182.336	0.01	0.223927	0.233927	0.055902
YBR221C	PDB1	-0.04	-0.15	478.3	473.8	465.221	427.012	-0.11	-0.0136376	-0.123638	0.212069
YBR222C	PCS60	-0.1	-0.28	39	50.1	36.3883	41.2619	-0.18	0.361336	0.181336	-0.082543
YBR225W	YBR225W	0.15	0.09	7.3	8.7	8.09986	9.26002	-0.06	0.253119	0.193119	-0.146118
YBR227C	MCX1	0.02	0.35	53.4	63.7	54.1454	81.1895	0.33	0.254454	0.584454	0.432672
YBR229C	ROT2	0.13	0.03	31	34.3	33.9231	35.0207	-0.1	0.14594	0.0459404	-0.113044
YBR230C	OM14	-0.04	-0.07	115.9	83.8	112.731	79.8311	-0.03	-0.467858	-0.497858	-0.550091
YBR231C	SWC5	-0.02	0.17	35.7	35.4	35.2085	39.8271	0.19	-0.0121747	0.177825	0.164458
YBR233W	PBP2	0.12	-0.03	23.1	27.3	25.1036	26.7382	-0.15	0.241008	0.0910081	0.22682
YBR233W-A	DAD3	-0.17	-0.26	97.2	95.4	86.3955	79.6674	-0.09	-0.026967	-0.116967	-0.026958
YBR234C	ARC40	0.19	0.29	146.1	136.9	166.666	167.379	0.1	-0.0938337	0.00616627	0.242146
YBR235W	YBR235W	0.18	0.02	14.7	20.1	16.6534	20.3806	-0.16	0.451379	0.291379	-0.133302
YBR236C	ABD1	0.1	0.08	95.6	89.5	102.462	94.6031	-0.02	-0.0951229	-0.115123	0.077641
YBR237W	PRP5	0.13	0.33	27.6	30.8	30.2025	38.716	0.2	0.158262	0.358262	0.347729
YBR238C	YBR238C	0.21	0.07	9.9	8.5	11.4512	8.92259	-0.14	-0.219966	-0.359966	-0.503736
YBR239C	ERT1	0.38	0.04	12.2	17.6	15.8764	18.0948	-0.34	0.528694	0.188694	0.25148
YBR242W	YBR242W	-0.01	0.06	91.3	102.4	90.6693	106.748	0.07	0.165529	0.235529	-0.159874
YBR244W	GPX2	-0.25	-0.09	66.3	94.1	55.7514	88.4091	0.16	0.505186	0.665186	0.608975
YBR245C	ISW1	0.12	0.28	29.1	30.8	31.624	37.3972	0.16	0.0819112	0.241911	0.123956
YBR247C	ENP1	-0.02	-0.04	56	61.4	55.229	59.721	-0.02	0.132812	0.112812	0.035456
YBR248C	HIS7	0.01	0.23	197.1	264.8	198.471	310.567	0.22	0.425975	0.645975	0.541702
YBR249C	ARO4	0.08	0.04	1133	1251.3	1197.6	1286.48	-0.04	0.14328	0.10328	0.188688
YBR251W	MRPS5	-0.1	0.04	95.1	88.8	88.7314	91.2965	0.14	-0.0988857	0.0411143	0.202001
YBR252W	DUT1	-0.06	-0.14	265.1	244.4	254.301	221.798	-0.08	-0.117292	-0.197292	-0.096237
YBR253W	SRB6	-0.01	0.04	129.1	140.4	128.208	144.347	0.05	0.121054	0.171054	0.189363
YBR255W	MTC4	0.06	0.27	26.2	33	27.3126	39.7917	0.21	0.332899	0.542899	0.663744
YBR256C	RIB5	-0.08	-0.03	780.7	1569.9	738.587	1537.59	0.05	1.00783	1.05783	0.781174
YBR258C	SHG1	-0.24	-0.05	55.9	52.8	47.3331	51.0014	0.19	-0.0823104	0.10769	-0.431509
YBR260C	RGD1	0.35	0.42	19.8	19.4	25.2363	25.9558	0.07	-0.0294438	0.0405562	-0.175864
YBR261C	TAE1	-0.25	-0.4	77.8	82	65.4217	62.1444	-0.15	0.0758538	-0.0741462	0.078492
YBR262C	AIM5	-0.2	-0.19	173	229.7	150.605	201.356	0.01	0.408979	0.418979	0.146463
YBR263W	SHM1	0.04	-0.12	132.7	122.8	136.431	112.999	-0.16	-0.111858	-0.271858	-0.141343
YBR264C	YPT10	0.07	0.18	66.6	63.9	69.9111	72.3913	0.11	-0.0597062	0.0502938	0.215458
YBR267W	REI1	0.11	0.21	90.9	88.6	98.1018	102.483	0.1	-0.0369736	0.0630264	-0.228192
YBR269C	FMP21	0.04	-0.03	69.7	96.4	71.6595	94.4161	-0.07	0.467874	0.397874	0.198069
YBR271W	YBR271W	0.23	0.15	42	51.3	49.2591	56.9209	-0.08	0.288569	0.208569	0.112914
YBR272C	HSM3	0.11	0.25	51.6	55.2	55.6882	65.6442	0.14	0.0972972	0.237297	0.013545
YBR273C	UBX7	-0.09	0.08	83.1	83.4	78.0743	88.1553	0.17	0.00519891	0.175199	0.268597
YBR275C	RIF1	0.31	0.33	15.5	17	19.2155	21.3692	0.02	0.133267	0.153267	0.167687
YBR278W	DPB3	-0.08	-0.07	67.1	73.9	63.4805	70.3999	0.01	0.139262	0.149262	-0.006289
YBR279W	PAF1	0.02	0.12	93.1	78.8	94.3996	85.6347	0.1	-0.240586	-0.140586	0.123636
YBR280C	SAF1	0.14	0.28	14.2	14.4	15.6471	17.4844	0.14	0.0201779	0.160178	-0.062937
YBR281C	DUG2	0.07	0.11	26.4	27.8	27.7125	30.0025	0.04	0.074547	0.114547	0.119676
YBR282W	MRPL27	-0.1	0.04	178.1	189	166.173	194.314	0.14	0.0856987	0.225699	0.095736
YBR283C	SSH1	0.04	-0.15	205.3	199.4	211.072	179.709	-0.19	-0.0420682	-0.232068	-0.106667
YBR286W	APE3	0.02	-0.15	282.7	236.3	286.646	212.965	-0.17	-0.258652	-0.428652	-0.278381
YBR288C	APM3	0.06	0.09	94.8	105	98.8258	111.759	0.03	0.14743	0.17743	0.235748
YBR289W	SNF5	0.15	0.04	18.1	18.3	20.0832	18.8145	-0.11	0.015854	-0.094146	0.045657
YBR291C	CTP1	0.09	0.03	30.6	37	32.5697	37.7774	-0.06	0.273994	0.213994	0.19091
YBR302C	COS2	-0.48	-0.27	29.9	19.8	21.4376	16.4205	0.21	-0.594645	-0.384645	0.120343
YCL001W	RER1	-0.14	0.07	214.8	226.7	194.935	237.971	0.21	0.0777904	0.28779	0.05537
YCL009C	ILV6	0.17	0.1	152.3	250.2	171.346	268.158	-0.07	0.716166	0.646166	0.345093
YCL010C	SGF29	0	-0.09	69	62.2	69	58.4383	-0.09	-0.149682	-0.239682	-0.020834
YCL011C	GBP2	-0.11	0.01	274.1	295.1	253.978	297.153	0.12	0.106502	0.226502	0.183154
YCL014W	BUD3	0.24	0.19	12.3	13.4	14.5262	15.2862	-0.05	0.123575	0.0735747	-0.163791
YCL016C	DCC1	-0.12	-0.29	34.1	38.7	31.3784	31.6528	-0.17	0.182562	0.0125618	0.214804
YCL017C	NFS1	0.15	0	86.5	98.9	95.9778	98.9	-0.15	0.19327	0.0432704	0.33953
YCL024W	KCC4	0.01	0.14	27.9	23.3	28.0941	25.6744	0.13	-0.259935	-0.129935	-0.34067
YCL025C	AGP1	0.07	0.05	124.9	415.9	131.11	430.567	-0.02	1.73546	1.71546	0.892844
YCL026C-A	FRM2	0.21	-0.02	14.8	137.4	17.119	135.508	-0.23	3.21471	2.98471	3.62038
YCL026C-B	HBN1	-0.22	n/a	7	4.7	6.00996			-0.574694		-0.819529
YCL028W	RNQ1	0.12	-0.08	101.3	101.7	110.086	96.2141	-0.2	0.00568551	-0.194314	0.073729
YCL029C	BIK1	-0.1	0	42.1	46	39.2807	46	0.1	0.127814	0.227814	0.397224
YCL030C	HIS4	-0.14	-0.24	536.2	930.8	486.612	788.151	-0.1	0.7957	0.6957	0.711484
YCL031C	RRP7	0.13	0.28	191.8	175.3	209.886	212.848	0.15	-0.129777	0.0202233	-0.24215
YCL032W	STE50	-0.13	0.06	54.8	59.6	50.078	62.131	0.19	0.121136	0.311136	0.148373
YCL033C	MXR2	-0.1	-0.24	104.6	109.9	97.5953	93.0573	-0.14	0.0713085	-0.0686915	-0.116618
YCL034W	LSB5	-0.12	-0.16	145.9	166.2	134.255	148.753	-0.04	0.18794	0.14794	0.394969
YCL035C	GRX1	0.03	0.08	313	281.9	319.577	297.973	0.05	-0.150979	-0.100979	-0.769394
YCL036W	GFD2	-0.11	-0.04	40.7	49.7	37.7121	48.341	0.07	0.288217	0.358217	-1.29392
YCL037C	SRO9	0.47	0.1	32.1	34.1	44.462	36.5475	-0.37	0.0871984	-0.282802	-0.180578
YCL039W	GID7	-0.13	-0.05	18.5	31.8	16.9059	30.7168	0.08	0.781501	0.861501	-0.08396
YCL040W	GLK1	0.04	-0.1	89.8	83.1	92.3246	77.535	-0.14	-0.111867	-0.251867	-0.463482
YCL043C	PDI1	-0.02	-0.09	444	319.9	437.887	300.553	-0.07	-0.472939	-0.542939	-0.292805
YCL044C	MGR1	0.14	0.22	18.2	18.5	20.0547	21.5476	0.08	0.0235868	0.103587	0.067062
YCL045C	EMC1	0.08	0.04	55.5	60.7	58.6645	62.4065	-0.04	0.129209	0.0892087	-0.040954
YCL047C	YCL047C	-0.02	0.11	79.7	75.7	78.6027	81.6976	0.13	-0.0742864	0.0557136	-0.080735
YCL050C	APA1	0.04	0.07	242.2	230	249.009	241.435	0.03	-0.074565	-0.044565	-0.427071
YCL052C	PBN1	-0.05	0.15	102.7	106.8	99.2017	118.502	0.2	0.0564755	0.256475	0.137305
YCL054W	SPB1	0.09	0.2	98.1	90.2	104.415	103.613	0.11	-0.121126	-0.0111257	-0.116505
YCL057W	PRD1	0.17	0.25	65.3	59.7	73.4663	70.9957	0.08	-0.129352	-0.0493521	-0.270165
YCL059C	KRR1	-0.13	-0.15	244.9	256	223.797	230.72	-0.02	0.063951	0.043951	0.020278
YCL061C	MRC1	0.33	0.24	20.2	22.6	25.3917	26.6904	-0.09	0.161967	0.0719675	-0.29055
YCL064C	CHA1	0.03	0.14	18.6	75.5	18.9908	83.1938	0.11	2.02117	2.13117	0.639143
YCR002C	CDC10	0.05	0.21	144.1	148.9	149.182	172.231	0.16	0.0472734	0.207273	0.180142
YCR004C	YCP4	-0.19	-0.24	239	192.6	209.509	163.083	-0.05	-0.311403	-0.361403	-0.095238
YCR005C	CIT2	-0.17	-0.31	970.9	1006.5	862.977	811.885	-0.14	0.0519526	-0.0880474	0.216765
YCR008W	SAT4	-0.11	-0.02	51.6	41	47.8119	40.4355	0.09	-0.331747	-0.241747	-0.096415
YCR009C	RVS161	0	0.05	307.5	277.8	307.5	287.597	0.05	-0.14654	-0.0965398	0.002867
YCR011C	ADP1	0.19	0.16	79.3	79.3	90.4626	88.6009	-0.03	0	-0.03	-0.044884
YCR012W	PGK1	0.12	-0.06	6373.3	5008.3	6926.09	4804.28	-0.18	-0.34772	-0.52772	-0.377762
YCR015C	YCR015C	0.09	0.19	38.8	37.2	41.2976	42.4364	0.1	-0.060754	0.039246	-0.129324
YCR016W	YCR016W	-0.1	0.1	100.9	101.5	94.143	108.785	0.2	0.00855355	0.208554	-0.01443
YCR017C	CWH43	0	0.03	65.6	68.6	65.6	70.0414	0.03	0.0645128	0.0945128	0.058602
YCR024C	SLM5	0.22	0.34	17.8	14.5	20.7323	18.3535	0.12	-0.295824	-0.175824	0.194307
YCR026C	NPP1	0.2	0.31	40.1	39.5	46.0628	48.9685	0.11	-0.0217496	0.0882504	0.114048
YCR027C	RHB1	0.22	0.25	52.1	51.4	60.6826	61.1252	0.03	-0.019515	0.010485	0.195126
YCR028C-A	RIM1	0.11	0.14	315.2	282.1	340.173	310.847	0.03	-0.160061	-0.130061	-0.036191
YCR030C	SYP1	0.18	0.15	22.3	22.4	25.2633	24.8544	-0.03	0.00645502	-0.023545	-0.060354
YCR031C	RPS14A	0.03	0.02	2729.2	2059	2786.55	2087.74	-0.01	-0.406534	-0.416534	-0.299298
YCR032W	BPH1	0.05	0.23	12.2	13.4	12.6302	15.716	0.18	0.135352	0.315352	0.069583
YCR033W	SNT1	0.24	0.31	23.2	22.8	27.399	28.2653	0.07	-0.025091	0.044909	0.125775
YCR035C	RRP43	-0.13	0.08	151.3	162.1	138.263	171.343	0.21	0.0994721	0.309472	0.233611
YCR036W	RBK1	-0.2	0.14	141.9	137.5	123.531	151.512	0.34	-0.045443	0.294557	0.05011
YCR037C	PHO87	0.23	0.07	40.1	52	47.0307	54.5853	-0.16	0.374909	0.214909	1.0327
YCR042C	TAF2	0.28	0.39	26.9	26.7	32.6618	34.9875	0.11	-0.0107664	0.0992336	0.063761
YCR043C	YCR043C	0.09	0.25	199.4	208.3	212.235	247.712	0.16	0.0629974	0.222997	-0.073999
YCR046C	IMG1	-0.11	-0.34	77.1	79.9	71.4399	63.1243	-0.23	0.0514646	-0.178535	0.294184
YCR047C	BUD23	-0.4	-0.19	104.4	109.7	79.1204	96.1636	0.21	0.0714418	0.281442	0.228736
YCR048W	ARE1	-0.26	-0.28	22.5	30.7	18.7895	25.2842	-0.02	0.448314	0.428314	0.315581
YCR051W	YCR051W	-0.19	-0.14	155.7	161.2	136.488	146.292	0.05	0.0500828	0.100083	-0.307278
YCR052W	RSC6	0.14	0.14	66.2	67.9	72.9461	74.8194	0	0.0365804	0.0365804	0.066153
YCR053W	THR4	0.13	0.11	321.9	367.5	352.253	396.616	-0.02	0.191132	0.171132	-0.199831
YCR054C	CTR86	0	0.19	25.8	30.1	25.8	34.337	0.19	0.222392	0.412392	0.122977
YCR057C	PWP2	0.24	0.31	43.3	44.5	51.137	55.167	0.07	0.0394383	0.109438	0.038656
YCR060W	TAH1	-0.05	-0.26	147.1	154.8	142.089	129.272	-0.21	0.0736082	-0.136392	0.104424
YCR066W	RAD18	0	0.14	23.2	28.5	23.2	31.4043	0.14	0.296837	0.436837	-0.04406
YCR067C	SED4	0.2	0.04	21.6	23.2	24.8119	23.8522	-0.16	0.103093	-0.0569065	-0.22701
YCR068W	ATG15	0.07	0.05	9.8	11.1	10.2872	11.4914	-0.02	0.179706	0.159706	0.14035
YCR069W	CPR4	-0.02	-0.05	70.6	77.9	69.628	75.2464	-0.03	0.141955	0.111955	0.190111
YCR071C	IMG2	0	0.07	99.2	101.9	99.2	106.966	0.07	0.038742	0.108742	0.11138
YCR072C	RSA4	0.07	0.07	45.7	51.4	47.9721	53.9554	0	0.169574	0.169574	0.036876
YCR073W-A	SOL2	0.16	-0.03	34.1	47.6	38.0995	46.6204	-0.19	0.48119	0.29119	0.360704
YCR077C	PAT1	0.02	0.13	49.2	51	49.8868	55.809	0.11	0.0518389	0.161839	-0.074205
YCR083W	TRX3	-0.08	-0.04	108.5	147.3	102.647	143.272	0.04	0.441062	0.481062	-0.186867
YCR084C	TUP1	0.11	0.12	40.3	41.6	43.4929	45.2082	0.01	0.0458037	0.0558037	0.031506
YCR086W	CSM1	0.08	0.02	37.7	35.2	39.8496	35.6914	-0.06	-0.0989891	-0.158989	0.172741
YCR087C-A	YCR087C-A	-0.16	-0.04	158.2	163.2	141.593	158.737	0.12	0.0448915	0.164891	-0.0824
YCR088W	ABP1	0.1	0.17	59.6	61.6	63.8777	69.3036	0.07	0.047618	0.117618	0.137155
YCR090C	YCR090C	-0.03	-0.01	181.7	189.2	177.961	187.893	0.02	0.0583537	0.0783537	-0.067536
YCR091W	KIN82	0.57	0.27	3.9	5.6	5.78964	6.75252	-0.3	0.521953	0.221953	-0.460258
YCR093W	CDC39	0.29	0.33	20	22.2	24.4528	27.9057	0.04	0.15056	0.19056	0.038505
YCR094W	CDC50	0.27	0.4	35.3	37	42.565	48.8218	0.13	0.0678571	0.197857	0.303761
YCR095C	OCA4	-0.23	0.12	71.4	82.6	60.8781	89.7643	0.35	0.210218	0.560218	-0.278179
YCR100C	YCR100C	0.44	0.49	18.6	20.1	25.2328	28.2293	0.05	0.111893	0.161893	-1.04275
YCR102C	YCR102C	-0.5	-0.49	5.8	7.8	4.10122	5.5538	0.01	0.427421	0.437421	-0.805898
YDL001W	RMD1	0	0.1	46.2	46.2	46.2	49.5159	0.1	0	0.1	-0.062839
YDL002C	NHP10	-0.06	0	127.8	125.4	122.594	125.4	0.06	-0.0273505	0.0326495	-0.033519
YDL003W	MCD1	0.01	0.12	92	80	92.6399	86.9388	0.11	-0.201634	-0.0916339	-0.36871
YDL004W	ATP16	0.1	0.28	357.7	274.6	383.373	333.418	0.18	-0.381418	-0.201418	-0.262448
YDL005C	MED2	0.19	0.25	59.8	56.3	68.2177	66.9524	0.06	-0.0870106	-0.0270106	-0.127861
YDL006W	PTC1	-0.04	0.03	93	106.6	90.4569	108.84	0.07	0.196905	0.266905	0.032805
YDL007W	RPT2	-0.22	-0.09	316.9	289	272.079	271.522	0.13	-0.132958	-0.00295817	-0.002035
YDL010W	GRX6	0.14	0.37	82.2	75.7	90.5766	97.8311	0.23	-0.118845	0.111155	0.207981
YDL014W	NOP1	-0.06	-0.1	399.6	395.3	383.322	368.828	-0.04	-0.0156086	-0.0556086	-0.096348
YDL015C	TSC13	-0.18	-0.09	237	222.2	209.201	208.762	0.09	-0.0930282	-0.00302824	-0.006524
YDL017W	CDC7	-0.05	0.29	24.9	22.6	24.0518	27.6317	0.34	-0.139823	0.200177	0.119135
YDL018C	ERP3	-0.16	0.12	98	77.8	87.7125	84.548	0.28	-0.333012	-0.0530116	-0.44246
YDL019C	OSH2	0.11	0.31	26.4	24.7	28.4916	30.6208	0.2	-0.0960269	0.103973	-0.019336
YDL021W	GPM2	-0.05	-0.04	18.7	15.4	18.063	14.9789	0.01	-0.280108	-0.270108	-1.13949
YDL022W	GPD1	0.18	0.01	97.7	30.5	110.683	30.7121	-0.17	-1.67955	-1.84955	-1.38741
YDL025C	RTK1	0.1	0.02	60.7	74.6	65.0566	75.6414	-0.08	0.297479	0.217479	0.31986
YDL027C	YDL027C	-0.14	-0.35	33.9	32.3	30.7649	25.3421	-0.21	-0.0697511	-0.279751	-0.053221
YDL029W	ARP2	-0.14	-0.05	344.4	371.7	312.55	359.039	0.09	0.110054	0.200054	0.374092
YDL030W	PRP9	-0.16	0.01	41.9	46.3	37.5016	46.622	0.17	0.144062	0.314062	0.15554
YDL031W	DBP10	0.27	0.39	61	62.8	73.5543	82.2927	0.12	0.0419553	0.161955	0.023548
YDL035C	GPR1	0.29	0.31	50.1	70.3	61.2543	87.1515	0.02	0.488714	0.508714	0.092613
YDL036C	PUS9	0.05	0.17	45.5	45.9	47.1046	51.6402	0.12	0.0126276	0.132628	0.301588
YDL040C	NAT1	0.17	0.26	69.8	61.5	78.5291	73.6449	0.09	-0.182641	-0.0926406	-0.106564
YDL042C	SIR2	0.4	0.42	18.4	14.4	24.2789	19.2662	0.02	-0.353637	-0.333637	-0.585281
YDL043C	PRP11	-0.01	0.1	64.5	64.5	64.0545	69.1294	0.11	0	0.11	0.013745
YDL044C	MTF2	0.13	0.21	44.9	46	49.1338	53.2077	0.08	0.0349184	0.114918	0.082344
YDL045C	FAD1	0.05	-0.02	45.1	46.5	46.6904	45.8598	-0.07	0.0441033	-0.0258967	-0.139279
YDL046W	NPC2	-0.14	-0.13	270	264.5	245.03	241.708	0.01	-0.0296917	-0.0196917	-0.037862
YDL047W	SIT4	0.03	0.1	79.5	71.8	81.1705	76.9533	0.07	-0.146971	-0.076971	-0.04705
YDL051W	LHP1	-0.11	0	331.8	291.1	307.442	291.1	0.11	-0.188799	-0.078799	-0.226131
YDL052C	SLC1	0.19	0.31	66.8	67.1	76.203	83.1844	0.12	0.00646466	0.126465	0.048322
YDL053C	PBP4	-0.12	0.01	123.6	130.5	113.735	131.408	0.13	0.0783711	0.208371	-0.021246
YDL055C	PSA1	0.03	0.03	2417	1693.5	2467.79	1729.08	0	-0.513209	-0.513209	-0.344204
YDL056W	MBP1	0.18	0.2	22.2	22.6	25.15	25.9606	0.02	0.0257631	0.0457631	0.085904
YDL058W	USO1	0.28	0.47	18.7	18.5	22.7054	25.6245	0.19	-0.015513	0.174487	0.082833
YDL060W	TSR1	0	0.07	90.3	87.5	90.3	91.8502	0.07	-0.045443	0.024557	0.038742
YDL061C	RPS29B	0.08	0.1	2263.9	1901.4	2392.98	2037.87	0.02	-0.251748	-0.231748	-0.267634
YDL063C	YDL063C	0.34	0.35	47.1	54.1	59.6171	68.9537	0.01	0.199902	0.209902	0.309942
YDL064W	UBC9	-0.21	0	91.2	95.6	78.8458	95.6	0.21	0.0679768	0.277977	0.074044
YDL065C	PEX19	0.02	0.17	76.7	64.5	77.7707	72.5663	0.15	-0.249927	-0.0999274	-0.452199
YDL066W	IDP1	0.22	0.1	376.6	535.5	438.639	573.935	-0.12	0.507854	0.387854	0.532571
YDL072C	YET3	-0.1	-0.09	291.1	262.9	271.606	247.001	0.01	-0.147001	-0.137001	-0.080153
YDL073W	YDL073W	0.15	0.3	42.7	47.8	47.3786	58.8487	0.15	0.162775	0.312775	0.131759
YDL074C	BRE1	0.13	0.1	89.5	85.9	97.9393	92.0653	-0.03	-0.0592296	-0.0892296	-0.058983
YDL075W	RPL31A	0.12	0.2	4459.5	3172.9	4846.29	3644.71	0.08	-0.49108	-0.41108	-0.338174
YDL076C	RXT3	-0.03	-0.04	80.2	70.5	78.5495	68.5722	-0.01	-0.185979	-0.195979	-0.201601
YDL077C	VAM6	0.06	0.17	16.3	14.6	16.9922	16.4259	0.11	-0.158904	-0.0489036	-0.226868
YDL078C	MDH3	-0.07	-0.17	249.9	200.1	238.064	177.857	-0.1	-0.32063	-0.42063	-0.147951
YDL081C	RPP1A	-0.32	-0.33	6128.9	4960.2	4909.68	3946.02	-0.01	-0.30523	-0.31523	-0.228127
YDL082W	RPL13A	0.02	0.07	1675.1	1218.1	1698.48	1278.66	0.05	-0.459615	-0.409615	-0.257001
YDL083C	RPS16B	0.06	-0.02	2584.2	1872.9	2693.94	1847.12	-0.08	-0.464444	-0.544444	-0.296553
YDL084W	SUB2	0.05	0.05	845.4	673.5	875.213	697.251	0	-0.327956	-0.327956	-0.214456
YDL085C-A	YDL085C-A	-0.51	-0.04	162.3	175.3	113.971	170.506	0.47	0.111163	0.581163	0.319689
YDL086W	YDL086W	-0.18	-0.03	211.4	237.9	186.603	233.004	0.15	0.17038	0.32038	0.139247
YDL087C	LUC7	-0.14	-0.12	18.5	21.3	16.7891	19.6	0.02	0.203328	0.223328	0.184272
YDL088C	ASM4	0.09	-0.01	51.8	54.7	55.1344	54.3222	-0.1	0.0785887	-0.0214113	-0.030288
YDL089W	NUR1	0.46	0.27	17	18.2	23.3842	21.9457	-0.19	0.0984037	-0.0915963	0.109874
YDL090C	RAM1	-0.03	0.02	57.8	65.1	56.6105	66.0088	0.05	0.171588	0.221588	-0.059428
YDL091C	UBX3	0.18	0.23	28	29	31.7207	34.0122	0.05	0.0506261	0.100626	0.106331
YDL092W	SRP14	-0.23	-0.14	268.7	271.8	229.103	246.664	0.09	0.0165491	0.106549	0.121677
YDL093W	PMT5	0.1	-0.18	22.2	26	23.7934	22.9503	-0.28	0.227952	-0.0520481	0.279807
YDL095W	PMT1	0.05	-0.1	133.2	111.3	137.897	103.847	-0.15	-0.25914	-0.40914	-0.042096
YDL097C	RPN6	0.19	0.23	218	200.2	248.686	234.802	0.04	-0.122886	-0.0828862	0.036445
YDL098C	SNU23	-0.13	-0.14	43.6	37.6	39.8431	34.1227	-0.01	-0.213595	-0.223595	-0.314201
YDL099W	BUG1	0.03	0.02	88.5	78.9	90.3596	80.0014	-0.01	-0.165652	-0.175652	-0.023075
YDL100C	GET3	0.01	-0.03	431.6	388	434.602	380.015	-0.04	-0.153638	-0.193638	-0.109448
YDL101C	DUN1	0.1	-0.02	53.6	54.6	57.4471	53.8483	-0.12	0.026668	-0.093332	0.026068
YDL102W	POL3	0.3	0.32	22.3	23.4	27.4545	29.2109	0.02	0.0694648	0.0894648	0.021733
YDL103C	QRI1	-0.06	0.11	99.3	93.5	95.2549	100.908	0.17	-0.0868274	0.0831726	-0.006111
YDL104C	QRI7	-0.12	0.06	35.7	41	32.8507	42.7411	0.18	0.1997	0.3797	-0.176878
YDL105W	NSE4	0	0.23	19.5	18.7	19.5	21.932	0.23	-0.0604359	0.169564	0.023277
YDL106C	PHO2	0.41	0.05	20.2	23.3	26.8395	24.1217	-0.36	0.205975	-0.154025	0.076089
YDL108W	KIN28	0.06	0.19	59.2	67	61.714	76.4312	0.13	0.178564	0.308564	0.422726
YDL110C	TMA17	-0.13	-0.1	159.6	103.8	145.847	96.8488	0.03	-0.620654	-0.590654	-0.518488
YDL111C	RRP42	-0.02	0.01	71.4	75.4	70.417	75.9244	0.03	0.0786404	0.10864	0.257052
YDL112W	TRM3	0.16	0.12	32.9	35.1	36.7587	38.1444	-0.04	0.0933834	0.0533834	0.151706
YDL113C	ATG20	-0.02	0.33	36.1	39.3	35.603	49.4006	0.35	0.12253	0.47253	-0.061528
YDL115C	IWR1	-0.16	0.06	70.7	75.8	63.2783	79.0189	0.22	0.100488	0.320488	0.198689
YDL116W	NUP84	-0.06	0.09	51.2	49.1	49.1143	52.2606	0.15	-0.0604208	0.0895792	0.16272
YDL117W	CYK3	0.19	0.16	34.9	36.1	39.8127	40.3341	-0.03	0.0487718	0.0187718	-0.05424
YDL121C	YDL121C	-0.21	-0.13	301.7	347.2	260.831	317.282	0.08	0.202652	0.282652	-0.175557
YDL122W	UBP1	0.1	0.17	82.5	78.2	88.4213	87.9796	0.07	-0.0772255	-0.00722551	0.039679
YDL124W	YDL124W	0.03	0.08	173.8	87.7	177.452	92.7005	0.05	-0.986779	-0.936779	-0.96645
YDL125C	HNT1	-0.14	-0.2	423.4	351.4	384.244	305.911	-0.06	-0.268907	-0.328907	-0.253108
YDL126C	CDC48	0.06	0.14	454.5	388.2	473.801	427.76	0.08	-0.22748	-0.14748	-0.116055
YDL130W	RPP1B	-0.06	-0.14	3103	2421.7	2976.6	2197.74	-0.08	-0.357644	-0.437644	-0.313373
YDL130W-A	STF1	-0.27	-0.03	97.7	77.5	81.0245	75.9051	0.24	-0.334162	-0.0941623	-0.406099
YDL131W	LYS21	0.18	0.1	111.5	156.4	126.317	167.625	-0.08	0.488197	0.408197	0.487571
YDL132W	CDC53	0.09	0.06	63	61.4	67.0553	64.0074	-0.03	-0.0371132	-0.0671132	-0.232882
YDL134C	PPH21	-0.01	0.02	155.8	152.8	154.724	154.933	0.03	-0.0280507	0.00194931	0.493042
YDL135C	RDI1	0	0.22	156.5	125.8	156.5	146.523	0.22	-0.315031	-0.0950307	-0.169397
YDL136W	RPL35B	-0.12	-0.03	807.1	677.4	742.683	663.459	0.09	-0.252739	-0.162739	-0.289311
YDL137W	ARF2	-0.14	-0.08	839.7	763.8	762.044	722.599	0.06	-0.136679	-0.0766791	-0.059967
YDL139C	SCM3	0.1	0.09	22	19.1	23.579	20.3295	-0.01	-0.203931	-0.213931	0.405313
YDL140C	RPO21	0.28	0.33	28.1	28.7	34.1189	36.0763	0.05	0.0304806	0.0804806	-0.039621
YDL141W	BPL1	0.24	0.08	20.6	29.8	24.3284	31.4991	-0.16	0.532668	0.372668	0.211884
YDL143W	CCT4	0.04	0.23	247.9	234.3	254.869	274.795	0.19	-0.0814013	0.108599	0.142301
YDL144C	YDL144C	-0.06	0.12	74.9	58.2	71.8489	63.248	0.18	-0.363947	-0.183947	-0.390194
YDL145C	COP1	0.17	0.11	97.3	90.1	109.468	97.2385	-0.06	-0.110913	-0.170913	-0.025622
YDL147W	RPN5	-0.06	0.14	388.3	374.3	372.482	412.443	0.2	-0.0529767	0.147023	0.046527
YDL148C	NOP14	0.06	0.33	85.9	78.6	89.5478	98.8013	0.27	-0.128129	0.141871	-0.064722
YDL150W	RPC53	-0.08	-0.01	85.1	83.1	80.5095	82.526	0.07	-0.0343107	0.0356893	0.109798
YDL153C	SAS10	-0.02	0.15	135.6	131.9	133.733	146.352	0.17	-0.0399126	0.130087	0.106916
YDL156W	YDL156W	0.29	0.47	10.3	9.3	12.5932	12.8815	0.18	-0.147342	0.0326583	-0.052539
YDL157C	YDL157C	-0.04	0.09	244.5	229.7	237.814	244.486	0.13	-0.0900836	0.0399164	-0.115082
YDL159W	STE7	0.34	0.31	22.5	25.2	28.4795	31.2406	-0.03	0.163499	0.133499	-0.028077
YDL160C	DHH1	0.29	0.34	36.4	29.7	44.5041	37.593	0.05	-0.293476	-0.243476	-0.167644
YDL160C-A	YDL160C-A	-0.16	-0.27	103.5	102.5	92.6351	85.0053	-0.11	-0.0140069	-0.124007	0.054288
YDL161W	ENT1	0.11	0.08	77.1	88.2	83.2085	93.229	-0.03	0.194048	0.164048	0.455099
YDL164C	CDC9	0.05	-0.07	36.4	33.7	37.6836	32.1039	-0.12	-0.11119	-0.23119	-0.090114
YDL166C	FAP7	0	0.08	149.4	153	149.4	161.724	0.08	0.0343515	0.114352	-0.036795
YDL167C	NRP1	0.15	0.31	66.5	73.5	73.7864	91.1185	0.16	0.14439	0.30439	-0.173221
YDL168W	SFA1	0.08	0.02	121.6	92.7	128.533	93.994	-0.06	-0.391502	-0.451502	-0.270939
YDL171C	GLT1	0.21	0.15	48.6	98.3	56.215	109.071	-0.06	1.01624	0.956235	0.402433
YDL173W	PAR32	-0.17	-0.24	218.8	230.9	194.479	195.513	-0.07	0.0776554	0.00765543	0.142257
YDL174C	DLD1	0.13	0.07	162.6	142.7	177.932	149.795	-0.06	-0.188342	-0.248342	0.286638
YDL175C	AIR2	0.09	0.12	32.6	40.5	34.6985	44.0128	0.03	0.31305	0.34305	-0.110053
YDL177C	YDL177C	-0.06	-0.07	79.2	81.1	75.9737	77.2589	-0.01	0.0342015	0.0242015	0.251726
YDL178W	DLD2	-0.09	0.02	210.4	266.8	197.676	270.524	0.11	0.342624	0.452624	0.256518
YDL180W	YDL180W	0.12	0.09	54	83	58.6837	88.3427	-0.03	0.620152	0.590152	0.29236
YDL182W	LYS20	-0.02	-0.18	151.6	206.3	149.513	182.102	-0.16	0.444474	0.284474	0.492104
YDL185W	VMA1	0.06	0.01	274.4	274.2	286.053	276.107	-0.05	-0.00105191	-0.0510519	-0.066752
YDL188C	PPH22	-0.08	-0.07	55.8	48.6	52.79	46.2982	0.01	-0.199309	-0.189309	0.193026
YDL189W	RBS1	0.11	0.22	33	40.1	35.6145	46.7058	0.11	0.281136	0.391136	0.212362
YDL190C	UFD2	0.12	0.13	47.8	48.3	51.9459	52.8544	0.01	0.0150126	0.0250126	0.180996
YDL191W	RPL35A	0	-0.05	1383.1	1070.5	1383.1	1034.03	-0.05	-0.369621	-0.419621	-0.284119
YDL192W	ARF1	-0.1	0.01	1995.3	1734.4	1861.68	1746.46	0.11	-0.202169	-0.092169	-0.054775
YDL193W	NUS1	0.21	0.24	51.8	43.5	59.9164	51.3732	0.03	-0.251937	-0.221937	-0.152239
YDL195W	SEC31	0.29	0.17	34.8	36.9	42.5479	41.5147	-0.12	0.0845335	-0.0354665	-0.037863
YDL198C	GGC1	0.04	0.07	380.2	511.3	390.889	536.72	0.03	0.427411	0.457411	0.471877
YDL201W	TRM8	-0.05	-0.18	61.3	56.2	59.2119	49.6079	-0.13	-0.125317	-0.255317	-0.146288
YDL202W	MRPL11	0.01	0.11	81.1	82.9	81.6641	89.468	0.1	0.0316702	0.13167	0.157247
YDL203C	ACK1	-0.11	0.14	27.8	30.6	25.7591	33.7183	0.25	0.138447	0.388447	0.109384
YDL204W	RTN2	-0.2	0.24	9.8	8.8	8.5314	10.3927	0.44	-0.155278	0.284722	-1.43829
YDL205C	HEM3	-0.33	-0.22	99.6	90.7	79.2354	77.8719	0.11	-0.135043	-0.0250432	-0.029187
YDL207W	GLE1	0.07	0.2	52.4	55.7	55.0052	63.9825	0.13	0.0881105	0.218111	-0.005153
YDL208W	NHP2	-0.28	-0.33	750.3	705.2	617.94	561.012	-0.05	-0.0894351	-0.139435	-0.059707
YDL209C	CWC2	-0.2	0.31	42.2	39.3	36.7372	48.7205	0.51	-0.102714	0.407286	-0.069478
YDL213C	NOP6	-0.23	-0.06	219.6	193.8	187.239	185.905	0.17	-0.180309	-0.0103095	-0.088959
YDL215C	GDH2	0.05	0.16	80.6	200.8	83.4424	224.351	0.11	1.31691	1.42691	1.30002
YDL219W	DTD1	0.05	0.12	148.2	143.2	153.426	155.62	0.07	-0.049514	0.020486	-0.091707
YDL220C	CDC13	0.02	0.28	6	5.9	6.08376	7.16375	0.26	-0.0242475	0.235752	0.293612
YDL223C	HBT1	0.49	0.25	2.3	3.2	3.23022	3.80546	-0.24	0.476438	0.236438	-0.322867
YDL224C	WHI4	0.21	0.27	23.7	25.4	27.4135	30.6275	0.06	0.0999414	0.159941	-0.089409
YDL225W	SHS1	0.07	0.04	89.6	87.1	94.0546	89.5487	-0.03	-0.040826	-0.070826	-0.011689
YDL226C	GCS1	-0.1	-0.16	139.8	171.3	130.438	153.318	-0.06	0.293161	0.233161	0.252646
YDL227C	HO	0.13	0.3	107.7	98.9	117.855	121.76	0.17	-0.122976	0.0470242	0.262452
YDL229W	SSB1	-0.15	-0.29	1031.3	815.9	929.46	667.326	-0.14	-0.338	-0.478	-0.342484
YDL230W	PTP1	-0.23	-0.17	71.6	87	61.0487	77.3293	0.06	0.281056	0.341056	-0.216095
YDL234C	GYP7	0.06	0.14	41.4	47.4	43.1581	52.2303	0.08	0.195256	0.275256	0.170132
YDL235C	YPD1	-0.03	0.05	206.7	201.5	202.446	208.606	0.08	-0.0367586	0.0432414	-0.184666
YDL236W	PHO13	-0.06	-0.06	252.4	261	242.118	250.368	0	0.0483379	0.0483379	0.142597
YDL237W	AIM6	0.1	0.33	79.6	90.9	85.3132	114.263	0.23	0.191512	0.421512	0.377293
YDL238C	GUD1	0.34	0.13	10.6	15.2	13.417	16.6333	-0.21	0.520007	0.310007	0.607515
YDL240W	LRG1	0.2	0.28	12.5	13.8	14.3587	16.7559	0.08	0.14274	0.22274	0.075317
YDL248W	COS7	0.28	0.09	13.7	8.5	16.6345	9.04715	-0.19	-0.688641	-0.878641	0.120343
YDR001C	NTH1	0.03	0.06	48.6	57.4	49.6212	59.8375	0.03	0.240094	0.270094	-0.217862
YDR002W	YRB1	-0.17	-0.13	1188.1	1050.7	1056.03	960.163	0.04	-0.177305	-0.137305	-0.228152
YDR005C	MAF1	-0.15	-0.14	73.6	72.1	66.332	65.4321	0.01	-0.0297065	-0.0197065	0.273681
YDR006C	SOK1	0.1	0	27.3	32.3	29.2594	32.3	-0.1	0.242633	0.142633	0.165709
YDR011W	SNQ2	0.16	0.07	29.9	38.6	33.4069	40.5191	-0.09	0.368455	0.278455	0.241909
YDR012W	RPL4B	-0.21	-0.22	355.9	294.2	307.689	252.59	-0.01	-0.274675	-0.284675	-0.186267
YDR013W	PSF1	0.04	0.17	61.6	63.8	63.3318	71.7787	0.13	0.0506261	0.180626	-0.248181
YDR014W	RAD61	0.22	0.24	16.4	18.9	19.1016	22.3208	0.02	0.20469	0.22469	-0.361808
YDR017C	KCS1	0.08	0.16	52.2	53.2	55.1763	59.4397	0.08	0.0273764	0.107376	-0.155572
YDR019C	GCV1	0.02	0.04	149.7	339.3	151.79	348.839	0.02	1.18049	1.20049	1.36349
YDR020C	DAS2	0.13	0.12	54.6	60.1	59.7484	65.3128	-0.01	0.138464	0.128464	0.061073
YDR021W	FAL1	0.11	0.27	39.3	46.9	42.4137	56.5524	0.16	0.255059	0.415059	0.146988
YDR023W	SES1	0.17	0.25	609.1	502.6	685.273	597.695	0.08	-0.277268	-0.197268	-0.11036
YDR025W	RPS11A	-0.08	-0.19	1219.9	953.3	1154.1	835.668	-0.11	-0.355761	-0.465761	-0.276894
YDR026C	YDR026C	0.11	0.29	46.1	47.8	49.7524	58.4422	0.18	0.0522439	0.232244	0.697544
YDR027C	VPS54	0.28	0.36	38.2	36.8	46.3822	47.2301	0.08	-0.0538669	0.0261331	-0.076726
YDR028C	REG1	0.22	0.2	67.8	69.1	78.9689	79.3751	-0.02	0.0274004	0.00740044	0.05119
YDR031W	MIC14	-0.02	0.25	72.2	49.4	71.206	58.7468	0.27	-0.547488	-0.277488	-0.425882
YDR032C	PST2	-0.13	-0.12	369.4	306.3	337.569	281.853	0.01	-0.270238	-0.260238	-0.261984
YDR033W	MRH1	0	-0.18	881.2	346.8	881.2	306.121	-0.18	-1.34537	-1.52537	-1.19667
YDR034C	LYS14	0.3	0.25	46.4	57.7	57.1251	68.6173	-0.05	0.314447	0.264447	-0.163153
YDR035W	ARO3	-0.14	-0.05	695.4	883.4	631.089	853.308	0.09	0.345224	0.435224	0.392264
YDR036C	EHD3	0.11	0.13	24.2	25.2	26.1173	27.5762	0.02	0.0584167	0.0784167	0.026447
YDR037W	KRS1	0.03	0.02	736.4	854.6	751.873	866.53	-0.01	0.21476	0.20476	0.268151
YDR038C	ENA5	0.12	-0.2	4.4	5.7	4.78163	4.96214	-0.32	0.373458	0.0534584	-0.171964
YDR040C	ENA1	0.28	0.13	2.6	3.2	3.15691	3.50174	-0.15	0.29956	0.14956	-0.192252
YDR041W	RSM10	-0.1	-0.11	219.7	259.8	204.987	240.728	-0.01	0.241867	0.231867	0.252809
YDR044W	HEM13	-0.13	-0.03	63.6	66.1	58.1197	64.7397	0.1	0.0556235	0.155624	-0.056074
YDR047W	HEM12	-0.13	0.13	152.5	129.7	139.359	141.93	0.26	-0.233631	0.0263692	-0.137927
YDR049W	VMS1	0.15	0.31	39.6	39.8	43.939	49.3404	0.16	0.007268	0.167268	0.090076
YDR050C	TPI1	0.03	-0.07	9298	7107.3	9493.37	6770.68	-0.1	-0.387619	-0.487619	-0.353232
YDR051C	DET1	-0.14	-0.01	140.8	137.1	127.779	136.153	0.13	-0.0384188	0.0915812	-0.068938
YDR054C	CDC34	-0.05	0.1	115.9	90.6	111.952	97.1027	0.15	-0.355298	-0.205298	-0.292337
YDR055W	PST1	-0.03	-0.21	144.3	126.9	141.33	109.71	-0.18	-0.185379	-0.365379	-0.714423
YDR056C	YDR056C	0.01	0.26	194.6	185.4	195.954	222.013	0.25	-0.0698705	0.18013	0.225847
YDR057W	YOS9	-0.03	0	37.6	36	36.8262	36	0.03	-0.0627358	-0.0327358	-0.156936
YDR059C	UBC5	0.16	0.08	41.4	70.1	46.2557	74.097	-0.08	0.759784	0.679784	0.106062
YDR060W	MAK21	0.03	0.17	97.8	97	99.855	109.131	0.14	-0.0118497	0.12815	-0.021437
YDR061W	YDR061W	0.01	-0.02	71.6	76.8	72.098	75.7427	-0.03	0.101147	0.0711467	0.238131
YDR062W	LCB2	-0.01	0.03	160.1	130.9	158.994	133.65	0.04	-0.290508	-0.250508	-0.085317
YDR063W	AIM7	0.05	0.24	112.1	86.5	116.053	102.156	0.19	-0.374014	-0.184014	-0.468433
YDR064W	RPS13	0	0.04	4484.3	3602.3	4484.3	3703.57	0.04	-0.315964	-0.275964	-0.269658
YDR067C	OCA6	0.07	-0.03	84.9	106.2	89.1209	104.014	-0.1	0.322947	0.222947	-0.120501
YDR068W	DOS2	-0.17	0.22	96	98.5	85.3289	114.726	0.39	0.0370893	0.427089	0.05852
YDR069C	DOA4	0.21	0.07	10	7.9	11.5669	8.29276	-0.14	-0.340075	-0.480075	-0.231043
YDR071C	PAA1	0.01	0.04	476.2	464.9	479.512	477.97	0.03	-0.0346472	-0.00464719	0.284613
YDR074W	TPS2	0.06	-0.03	44.5	41.8	46.3897	40.9398	-0.09	-0.0903024	-0.180302	-0.428488
YDR075W	PPH3	-0.05	0.38	55.3	54.1	53.4163	70.4026	0.43	-0.0316509	0.398349	0.868654
YDR077W	SED1	0.01	-0.11	896.3	487	902.534	451.248	-0.12	-0.88006	-1.00006	-1.35669
YDR079C-A	TFB5	0.12	-0.12	91.9	138.4	99.8709	127.354	-0.24	0.590707	0.350707	0.069094
YDR079W	PET100	-0.13	0.06	81.3	87.6	74.2945	91.32	0.19	0.107676	0.297676	0.190586
YDR080W	VPS41	0.11	0.2	30.1	74.2	32.4848	85.2334	0.09	1.30166	1.39166	0.921644
YDR081C	PDC2	0.1	0.01	23.8	29.7	25.5082	29.9066	-0.09	0.319501	0.229501	-0.029537
YDR083W	RRP8	0.08	0.3	114.9	109.5	121.451	134.81	0.22	-0.0694479	0.150552	-0.046658
YDR087C	RRP1	-0.14	-0.09	196	204.9	177.874	192.508	0.05	0.0640663	0.114066	-0.031752
YDR088C	SLU7	-0.14	0.09	56.2	52.3	51.0026	55.6666	0.23	-0.103759	0.126241	-0.04469
YDR089W	YDR089W	0.15	0.16	22.2	25.9	24.6324	28.9377	0.01	0.222392	0.232392	0.289847
YDR091C	RLI1	-0.09	-0.08	155.2	139.4	145.814	131.88	0.01	-0.154898	-0.144898	-0.239107
YDR093W	DNF2	0.04	0.05	16.2	16.3	16.6554	16.8748	0.01	0.00887815	0.0188782	-0.107582
YDR096W	GIS1	0.09	0.17	10.2	9.1	10.8566	10.238	0.08	-0.164631	-0.0846307	-0.435987
YDR097C	MSH6	0.09	0.17	28.4	28.1	30.2281	31.6141	0.08	-0.0153208	0.0646792	-0.285958
YDR098C	GRX3	-0.09	0.05	282.1	272.2	265.039	281.799	0.14	-0.0515396	0.0884604	-0.153261
YDR099W	BMH2	0.15	0.11	325.1	332.4	360.721	358.735	-0.04	0.0320368	-0.00796317	-0.029426
YDR101C	ARX1	0.12	0.1	135.7	140.1	147.47	150.155	-0.02	0.0460362	0.0260362	0.04558
YDR103W	STE5	0.16	0.19	29.7	31.3	33.1834	35.7059	0.03	0.0756997	0.1057	-0.151999
YDR108W	GSG1	0	-0.07	25.8	34.2	25.8	32.5802	-0.07	0.406625	0.336625	0.436075
YDR109C	YDR109C	0.15	0.25	17.6	21.1	19.5284	25.0923	0.1	0.261668	0.361668	-0.040975
YDR110W	FOB1	0.03	0.18	54	60	55.1347	67.973	0.15	0.152003	0.302003	-0.93607
YDR111C	ALT2	0.02	-0.32	48.7	44.3	49.3798	35.4874	-0.34	-0.136615	-0.476615	0.120735
YDR113C	PDS1	0.06	0.04	40.3	38.6	42.0114	39.6852	-0.02	-0.062179	-0.082179	-0.029216
YDR116C	MRPL1	-0.01	0.04	85.9	80.2	85.3066	82.4547	0.05	-0.0990559	-0.0490559	0.070503
YDR117C	TMA64	0.11	0.1	40	40.6	43.1691	43.514	-0.01	0.0214797	0.0114797	0.185942
YDR118W	APC4	0.06	0.22	23.4	25.6	24.3937	29.8172	0.16	0.129635	0.289635	0.021836
YDR119W	VBA4	0.15	0.15	79.5	98.4	88.2108	109.182	0	0.307703	0.307703	0.303139
YDR120C	TRM1	0.13	0.15	134.1	147.1	146.745	163.218	0.02	0.133488	0.153488	0.186277
YDR121W	DPB4	-0.32	-0.11	97	95.6	77.7038	88.5818	0.21	-0.0209741	0.189026	0.160797
YDR122W	KIN1	0.1	0.16	24.5	24.7	26.2584	27.597	0.06	0.0117293	0.0717293	0.034368
YDR127W	ARO1	0.2	0.23	92.2	120.8	105.91	141.678	0.03	0.389782	0.419782	0.085862
YDR129C	SAC6	-0.1	-0.07	289.4	269.9	270.02	257.117	0.03	-0.10064	-0.0706399	0.023179
YDR131C	YDR131C	-0.26	-0.09	20.6	23.3	17.2028	21.8909	0.17	0.177686	0.347686	0.390752
YDR135C	YCF1	0.25	0.22	54.1	58.3	64.3361	67.904	-0.03	0.107867	0.0778673	0.102566
YDR137W	RGP1	0.03	0.09	52.3	57.8	53.3989	61.5206	0.06	0.144259	0.204259	0.082768
YDR138W	HPR1	0.18	0.38	27.7	30.5	31.3809	39.6909	0.2	0.138923	0.338923	0.254092
YDR141C	DOP1	0.07	0.06	20.8	23.3	21.8341	24.2895	-0.01	0.163746	0.153746	0.272831
YDR142C	PEX7	0	0.09	34.3	36.2	34.3	38.5302	0.09	0.0777811	0.167781	-1.22838
YDR143C	SAN1	-0.02	0.09	17.3	23	17.0618	24.4805	0.11	0.410862	0.520862	0.154561
YDR144C	MKC7	0.21	0.17	62.7	51	72.5243	57.378	-0.04	-0.297968	-0.337968	-0.32428
YDR145W	TAF12	-0.04	-0.07	77.1	80.3	74.9917	76.4968	-0.03	0.0586691	0.0286691	0.022254
YDR146C	SWI5	0.17	0.21	43.6	39.8	49.0525	46.0362	0.04	-0.13156	-0.0915597	-1.42813
YDR148C	KGD2	0.09	0.12	114	100.8	121.338	109.543	0.03	-0.177538	-0.147538	-0.350318
YDR150W	NUM1	0.28	0.21	13.9	14.6	16.8773	16.8876	-0.07	0.0708835	0.000883486	-0.001024
YDR152W	GIR2	0.01	0.12	154.5	128.2	155.575	139.319	0.11	-0.269211	-0.159211	-0.161028
YDR153C	ENT5	0.14	0.16	73.1	62.1	80.5493	69.3835	0.02	-0.235278	-0.215278	-0.374869
YDR155C	CPR1	-0.3	-0.42	2492.2	1831.5	2024.3	1368.91	-0.12	-0.444394	-0.564394	-0.281727
YDR156W	RPA14	0.14	0.16	60	72.9	66.1143	81.4502	0.02	0.280956	0.300956	-0.165476
YDR158W	HOM2	0.07	-0.08	1717.7	2296.5	1803.1	2172.62	-0.15	0.418959	0.268959	0.401262
YDR159W	SAC3	-0.03	0.14	20.1	19.3	19.6863	21.2668	0.17	-0.0585947	0.111405	0.002156
YDR161W	YDR161W	-0.01	0.14	136.1	139.4	135.16	153.606	0.15	0.0345635	0.184563	0.182847
YDR162C	NBP2	-0.09	0.05	96.9	99.1	91.0398	102.595	0.14	0.0323884	0.172388	0.204868
YDR163W	CWC15	-0.25	0.16	82.6	91.8	69.458	102.567	0.41	0.152352	0.562352	0.043397
YDR164C	SEC1	0.16	0.14	26.4	27.7	29.4964	30.5228	-0.02	0.069348	0.049348	0.278816
YDR165W	TRM82	-0.01	0	132	138	131.088	138	0.01	0.0641303	0.0741303	-0.037823
YDR166C	SEC5	0.37	0.35	18.8	20.8	24.2962	26.5109	-0.02	0.145851	0.125851	0.195502
YDR167W	TAF10	0	-0.1	134.5	168.6	134.5	157.309	-0.1	0.325998	0.225998	0.096325
YDR168W	CDC37	-0.01	0.05	145.1	139.5	144.098	144.419	0.06	-0.0567824	0.0032176	-0.030404
YDR169C	STB3	0.16	0	19.9	21.4	22.234	21.4	-0.16	0.104842	-0.0551576	-0.123582
YDR170C	SEC7	0.23	0.18	44.2	43.9	51.8393	49.7336	-0.05	-0.00982543	-0.0598254	-0.102412
YDR171W	HSP42	0.05	0.09	48.8	29.9	50.5209	31.8247	0.04	-0.706736	-0.666736	-0.637932
YDR172W	SUP35	0.1	0.11	267.8	233.7	287.021	252.216	0.01	-0.196498	-0.186498	-0.138013
YDR173C	ARG82	0.05	-0.01	22.5	24	23.2935	23.8342	-0.06	0.0931094	0.0331094	0.012775
YDR174W	HMO1	-0.16	-0.05	350.8	272.6	313.975	263.314	0.11	-0.363863	-0.253863	-0.17724
YDR175C	RSM24	-0.17	-0.09	89.8	91.8	79.8181	86.2482	0.08	0.0317787	0.111779	0.120569
YDR176W	NGG1	0.05	0.05	39.3	37	40.6859	38.3048	0	-0.087004	-0.087004	0.011485
YDR177W	UBC1	-0.17	-0.24	299.8	311.4	266.475	263.676	-0.07	0.0547686	-0.0152314	0.098063
YDR180W	SCC2	0.37	0.28	8	9.4	10.3388	11.4134	-0.09	0.232661	0.142661	-0.013323
YDR181C	SAS4	-0.17	-0.05	43.3	44.7	38.4869	43.1774	0.12	0.0459078	0.165908	0.966424
YDR182W	CDC1	0.18	0.27	61	57.7	69.1059	69.5751	0.09	-0.0802379	0.00976208	0.157682
YDR183W	PLP1	0.17	0.37	48.3	47.3	54.3403	61.1283	0.2	-0.030183	0.169817	0.227883
YDR186C	YDR186C	0.09	0.11	36.8	41	39.1688	44.2484	0.02	0.155918	0.175918	0.377925
YDR188W	CCT6	0.01	-0.11	245.9	200.8	247.61	186.059	-0.12	-0.292312	-0.412312	-0.022584
YDR189W	SLY1	0.16	0.13	53.4	51.1	59.6631	55.9184	-0.03	-0.0635165	-0.0935165	-0.121198
YDR190C	RVB1	-0.01	0.09	278.6	260.6	276.676	277.375	0.1	-0.0963582	0.00364183	0.01073
YDR192C	NUP42	0.17	0	21	24.3	23.6262	24.3	-0.17	0.210567	0.040567	0.041179
YDR194C	MSS116	0.2	0.26	144.6	131.9	166.102	157.947	0.06	-0.132623	-0.072623	-0.101408
YDR195W	REF2	0.23	0.02	35.9	46	42.1048	46.6421	-0.21	0.35765	0.14765	0.257345
YDR196C	CAB5	-0.13	0.02	118.4	101.3	108.198	102.714	0.15	-0.225035	-0.0750349	-0.200932
YDR198C	RKM2	-0.04	0.16	41.9	47.3	40.7542	52.8477	0.2	0.17489	0.37489	-0.123675
YDR200C	VPS64	0.06	0.1	27.7	28	28.8763	30.0097	0.04	0.0155409	0.0555409	0.019441
YDR201W	SPC19	-0.24	-0.04	100.6	88.9	85.1826	86.469	0.2	-0.178375	0.021625	0.033593
YDR202C	RAV2	-0.05	-0.07	49.7	44	48.007	41.9161	-0.02	-0.175742	-0.195742	-0.114229
YDR204W	COQ4	0.1	0.1	69.1	52	74.0595	55.7322	0	-0.410174	-0.410174	0.142171
YDR206W	EBS1	0.12	0.01	64.3	70.5	69.8771	70.9904	-0.11	0.132805	0.0228045	0.093802
YDR207C	UME6	0.15	-0.27	12.9	13.5	14.3134	11.1958	-0.42	0.0655883	-0.354412	-0.198525
YDR208W	MSS4	0.12	0.12	43.8	47.5	47.599	51.6199	0	0.116997	0.116997	0.453972
YDR211W	GCD6	0.2	0.21	120.8	119.9	138.763	138.687	0.01	-0.0107888	-0.000788796	0.028852
YDR212W	TCP1	-0.03	0.01	239.1	225	234.179	226.565	0.04	-0.0876891	-0.0476891	-0.01522
YDR213W	UPC2	0.32	0.08	11.6	12.7	14.4806	13.4241	-0.24	0.130704	-0.109296	-0.406374
YDR214W	AHA1	-0.2	-0.26	201.8	256.2	175.677	213.95	-0.06	0.344344	0.284344	0.281591
YDR216W	ADR1	0.3	0.22	9.6	6.4	11.819	7.45429	-0.08	-0.584963	-0.664963	-0.957537
YDR217C	RAD9	0.09	0.3	19.7	23.6	20.9681	29.055	0.21	0.260591	0.470591	-0.020886
YDR219C	MFB1	0.05	0.12	51	60.6	52.7985	65.8561	0.07	0.248821	0.318821	-0.13305
YDR221W	GTB1	0.07	0.18	34.2	36.3	35.9003	41.1237	0.11	0.0859732	0.195973	0.225926
YDR222W	YDR222W	-0.28	-0.01	20.2	15.2	16.6365	15.095	0.27	-0.410284	-0.140284	0.519057
YDR224C	HTB1	-0.06	-0.08	1793.1	1645.6	1720.06	1556.83	-0.02	-0.123842	-0.143842	0.027767
YDR225W	HTA1	-0.36	-0.3	2537.3	2702.2	1976.97	2194.87	0.06	0.0908404	0.15084	0.034213
YDR226W	ADK1	-0.07	-0.13	1308.9	1020.6	1246.91	932.656	-0.06	-0.358937	-0.418937	-0.30658
YDR227W	SIR4	0.1	0.22	16.3	16.9	17.4699	19.684	0.12	0.0521513	0.172151	-0.049899
YDR228C	PCF11	0.17	0.25	26.4	28.1	29.7015	33.4167	0.08	0.0900322	0.170032	-0.019208
YDR229W	IVY1	0.03	0.09	64.8	60.6	66.1616	64.5008	0.06	-0.096676	-0.036676	0.016177
YDR231C	COX20	-0.22	-0.24	94.4	113.3	81.0486	95.9362	-0.02	0.263289	0.243289	0.038835
YDR232W	HEM1	0.22	0.04	50.8	67.1	59.1685	68.9864	-0.18	0.401484	0.221484	0.369236
YDR233C	RTN1	0.19	0.07	337.9	298.4	385.464	313.235	-0.12	-0.179349	-0.299349	-0.524631
YDR234W	LYS4	0.11	0.2	68.6	134	74.0351	153.926	0.09	0.965953	1.05595	1.05102
YDR235W	PRP42	0.03	0.18	48.9	49.5	49.9275	56.0778	0.15	0.0175941	0.167594	0.026607
YDR236C	FMN1	-0.01	0.09	92.1	94.6	91.4638	100.689	0.1	0.038639	0.138639	0.092128
YDR237W	MRPL7	-0.3	-0.28	104.2	102.6	84.6367	84.5004	0.02	-0.0223245	-0.00232455	0.130263
YDR238C	SEC26	0.27	0.32	141.8	124.4	170.984	155.292	0.05	-0.188871	-0.138871	0.000123
YDR239C	YDR239C	0.46	0.17	14.6	18.8	20.0829	21.1511	-0.29	0.364764	0.0747643	0.065492
YDR240C	SNU56	0.1	0.05	36.8	40.6	39.4413	42.0318	-0.05	0.141774	0.091774	0.041296
YDR242W	AMD2	0.15	0.09	44.1	208.9	48.932	222.347	-0.06	2.24396	2.18396	3.48797
YDR243C	PRP28	0	0.1	24.5	24.7	24.5	26.4728	0.1	0.0117293	0.111729	0.011614
YDR244W	PEX5	-0.08	-0.04	52.6	75	49.7626	72.9491	0.04	0.511828	0.551828	0.295254
YDR245W	MNN10	0	0.01	236.9	239.8	236.9	241.468	0.01	0.0175535	0.0275535	-0.001425
YDR246W	TRS23	0.22	0.37	32.3	28.5	37.6209	36.8321	0.15	-0.180572	-0.0305722	-0.016472
YDR248C	YDR248C	-0.19	-0.08	108	106.4	94.6734	100.661	0.11	-0.0215332	0.0884668	0.248305
YDR251W	PAM1	0.28	0.27	35	31.3	42.4968	37.7418	-0.01	-0.161192	-0.171192	-0.113346
YDR252W	BTT1	-0.17	-0.01	26.2	26	23.2877	25.8204	0.16	-0.0110552	0.148945	-1.45284
YDR255C	RMD5	0.36	0.43	13.3	13	17.0696	17.514	0.07	-0.0329146	0.0370854	-0.173286
YDR257C	RKM4	-0.04	0.14	92	97.2	89.4843	107.105	0.18	0.0793225	0.259322	0.176254
YDR258C	HSP78	0.12	0.21	100.7	275.5	109.434	318.668	0.09	1.45199	1.54199	1.0388
YDR259C	YAP6	0.16	0.16	11.8	6.9	13.184	7.70928	0	-0.774119	-0.774119	-0.896016
YDR261C	EXG2	0.16	0.12	37.5	34.4	41.8983	37.3837	-0.04	-0.124482	-0.164482	-0.445283
YDR262W	YDR262W	-0.07	0.03	93.6	117.2	89.1669	119.663	0.1	0.324392	0.424392	0.032284
YDR264C	AKR1	0.07	0.12	156.3	128.7	164.071	139.863	0.05	-0.280306	-0.230306	-0.036983
YDR266C	YDR266C	0.21	0.25	41.7	40.1	48.2339	47.6872	0.04	-0.0564451	-0.0164451	-0.057911
YDR267C	CIA1	-0.06	0.04	108.4	111.6	103.984	114.738	0.1	0.0419723	0.141972	0.39038
YDR268W	MSW1	0.03	-0.05	56.3	58.1	57.483	56.1209	-0.08	0.0454032	-0.0345968	0.093501
YDR270W	CCC2	0.23	0.39	42	20.3	49.2591	26.601	0.16	-1.04891	-0.88891	-0.223235
YDR272W	GLO2	-0.06	0.01	193.3	199.2	185.426	200.586	0.07	0.043376	0.113376	0.076531
YDR279W	RNH202	0.03	0.01	65.1	65.3	66.4679	65.7542	-0.02	0.00442545	-0.0155746	0.030926
YDR280W	RRP45	-0.02	0.08	154.8	156.9	152.669	165.846	0.1	0.0194399	0.11944	0.238804
YDR283C	GCN2	0.16	0.27	18.7	21.8	20.8933	26.2866	0.11	0.22129	0.33129	0.253899
YDR286C	YDR286C	0.01	-0.2	49.4	48.8	49.7436	42.4829	-0.21	-0.0176299	-0.22763	-0.426008
YDR287W	INM2	-0.13	0.11	51.8	53.2	47.3365	57.4149	0.24	0.0384741	0.278474	0.293711
YDR288W	NSE3	0.05	0.05	77.1	96.6	79.8189	100.007	0	0.325292	0.325292	0.288397
YDR289C	RTT103	-0.24	0.18	57	49.6	48.2645	56.191	0.42	-0.200622	0.219378	0.054764
YDR291W	HRQ1	0.2	0.33	19.7	18.1	22.6294	22.7519	0.13	-0.122206	0.00779407	0.058674
YDR292C	SRP101	0.11	0.15	113.8	119.4	122.816	132.483	0.04	0.0693023	0.109302	0.248004
YDR293C	SSD1	0.13	0.06	38.4	40.4	42.0209	42.1156	-0.07	0.073249	0.00324898	-0.099529
YDR294C	DPL1	0.06	0.08	95.4	89.6	99.4512	94.7088	0.02	-0.0904905	-0.0704905	-0.089389
YDR295C	HDA2	0.13	0.05	31.3	36.4	34.2514	37.6836	-0.08	0.217776	0.137776	0.134597
YDR296W	MHR1	0.22	0.07	93.3	100.8	108.67	105.811	-0.15	0.111547	-0.0384533	0.141735
YDR297W	SUR2	-0.12	0.01	94.7	76.7	87.1418	77.2335	0.13	-0.304138	-0.174138	-0.395281
YDR298C	ATP5	-0.13	-0.05	420.6	368.3	384.358	355.754	0.08	-0.191567	-0.111567	-0.283032
YDR299W	BFR2	0.06	0.22	80.7	76.3	84.127	88.8692	0.16	-0.0808856	0.0791144	-0.051046
YDR300C	PRO1	0.13	0.13	115	119.1	125.844	130.33	0	0.0505396	0.0505396	0.035527
YDR301W	CFT1	0.35	0.46	14.2	14.8	18.0988	20.358	0.11	0.0597062	0.169706	0.156879
YDR303C	RSC3	0.14	0.14	32.6	34.7	35.9221	38.2361	0	0.0900637	0.0900637	-0.079574
YDR304C	CPR5	-0.23	-0.03	446.3	401.1	380.531	392.845	0.2	-0.154052	0.0459482	-0.099776
YDR305C	HNT2	-0.18	-0.07	82.7	80.9	72.9995	77.0684	0.11	-0.0317476	0.0782524	0.003826
YDR308C	SRB7	-0.08	0.01	116.9	128.4	110.594	129.293	0.09	0.13537	0.22537	0.190348
YDR310C	SUM1	0.13	0.18	22.1	20.6	24.1839	23.3374	0.05	-0.101402	-0.051402	-0.23586
YDR311W	TFB1	0.09	0.15	42	42.5	44.7035	47.1567	0.06	0.0170735	0.0770735	-0.072191
YDR312W	SSF2	0	0.18	59.3	65	59.3	73.6375	0.18	0.132408	0.312408	-0.021933
YDR316W	OMS1	0.04	0.25	52.2	44.8	53.6675	53.2765	0.21	-0.220551	-0.0105511	-0.083781
YDR318W	MCM21	-0.19	0.02	45.5	47	39.8856	47.6561	0.21	0.0467942	0.256794	-4.97475
YDR320C	SWA2	0.26	0.3	16.1	17.7	19.2794	21.7913	0.04	0.136689	0.176689	0.012427
YDR321W	ASP1	-0.1	-0.23	225.6	212.3	210.492	181.014	-0.13	-0.0876627	-0.217663	-0.148764
YDR322W	MRPL35	-0.08	0.21	74.2	67.1	70.1975	77.6138	0.29	-0.145106	0.144894	0.090266
YDR323C	PEP7	0.09	0.11	24.2	29.3	25.7578	31.6214	0.02	0.275894	0.295894	-0.047734
YDR324C	UTP4	0.16	0.16	88.8	91	99.2151	101.673	0	0.0353069	0.0353069	0.04065
YDR325W	YCG1	0.19	0.18	31.9	36.8	36.3904	41.6901	-0.01	0.206149	0.196149	-0.042432
YDR326C	YSP2	0.17	0.28	25	28.9	28.1265	35.0902	0.11	0.209141	0.319141	-0.00208
YDR328C	SKP1	-0.14	-0.23	510.8	522.5	463.561	445.502	-0.09	0.0326725	-0.0573275	0.006982
YDR329C	PEX3	-0.18	-0.17	81.9	90.1	72.2934	80.0847	0.01	0.137664	0.147664	0.257779
YDR330W	UBX5	-0.04	-0.01	34.1	29.7	33.1675	29.4948	0.03	-0.199309	-0.169309	-0.194551
YDR331W	GPI8	0.07	-0.04	76.6	66.8	80.4083	64.9734	-0.11	-0.197496	-0.307496	-0.044574
YDR332W	IRC3	0.17	0.3	19.7	18.6	22.1637	22.8993	0.13	-0.082893	0.047107	-0.079109
YDR333C	YDR333C	0.04	0.1	66	67.9	67.8555	72.7734	0.06	0.0409455	0.100946	-0.012166
YDR334W	SWR1	0.14	0.32	27.3	22.9	30.082	28.5868	0.18	-0.253553	-0.0735534	-0.005341
YDR335W	MSN5	0.13	0.26	46.5	48.2	50.8847	57.7185	0.13	0.0518024	0.181802	-0.015142
YDR337W	MRPS28	-0.14	0.09	111.5	103.5	101.188	110.162	0.23	-0.107413	0.122587	-0.011738
YDR339C	FCF1	-0.04	0.04	210.4	198.9	204.647	204.492	0.08	-0.0810914	-0.00109143	-0.197503
YDR341C	YDR341C	0.04	0.11	431.8	499.6	443.94	539.182	0.07	0.21041	0.28041	0.264294
YDR342C	HXT7	0.05	0.21	4.7	3.8	4.86575	4.39542	0.16	-0.306661	-0.146661	-0.0375
YDR343C	HXT6	-0.03	0.06	3.4	2.3	3.33003	2.39767	0.09	-0.563901	-0.473901	-0.032308
YDR345C	HXT3	0.07	-0.1	429.8	349.9	451.168	326.468	-0.17	-0.296723	-0.466723	-0.330205
YDR346C	SVF1	0	0.1	304.6	311.6	304.6	333.965	0.1	0.0327793	0.132779	0.04656
YDR347W	MRP1	0.08	0.02	101.2	102.2	106.97	103.627	-0.06	0.0141859	-0.0458141	0.278187
YDR348C	YDR348C	-0.31	-0.15	80.3	78.7	64.7733	70.9284	0.16	-0.0290364	0.130964	-0.062217
YDR351W	SBE2	0.27	0.33	34.8	36.9	41.9621	46.3838	0.06	0.0845335	0.144534	0.200027
YDR353W	TRR1	-0.08	-0.23	375.4	298.6	355.15	254.597	-0.15	-0.330214	-0.480214	-0.211356
YDR354W	TRP4	-0.07	-0.15	319.2	368.9	304.082	332.471	-0.08	0.208769	0.128769	0.434871
YDR356W	SPC110	0.3	0.58	26.6	26.1	32.7484	39.0156	0.28	-0.0273764	0.252624	0.028102
YDR358W	GGA1	0.29	0.17	37.7	36.9	46.0935	41.5147	-0.12	-0.0309437	-0.150944	-0.036236
YDR359C	EAF1	0.16	0.27	9.8	10.3	10.9494	12.4198	0.11	0.0717907	0.181791	0.111168
YDR361C	BCP1	-0.15	-0.05	217.4	249.2	195.932	240.711	0.1	0.196952	0.296952	0.204008
YDR362C	TFC6	0.09	0.2	29.2	30.8	31.0796	35.3799	0.11	0.076962	0.186962	0.162487
YDR363W	ESC2	0.07	0.21	31.3	30.5	32.8561	35.279	0.14	-0.0373534	0.102647	0.337136
YDR364C	CDC40	0.19	0.23	48.5	46	55.327	53.9504	0.04	-0.0763509	-0.0363509	-0.564927
YDR365C	ESF1	-0.08	0.15	120.8	106	114.284	117.614	0.23	-0.188556	0.0414438	-0.077424
YDR367W	KEI1	0.16	0.11	119.5	122.6	133.516	132.313	-0.05	0.0369484	-0.0130516	-0.304394
YDR368W	YPR1	-0.01	0.07	193.5	123	192.163	129.115	0.08	-0.653675	-0.573675	-0.597426
YDR371W	CTS2	0.21	0.32	35	42.1	40.4841	52.5547	0.11	0.266465	0.376465	0.19485
YDR372C	VPS74	-0.09	0.02	277.9	284.3	261.093	288.269	0.11	0.0328483	0.142848	0.105939
YDR373W	FRQ1	-0.12	0.04	236	232	217.164	238.522	0.16	-0.0246621	0.135338	0.270138
YDR375C	BCS1	-0.04	0	57.7	59.6	56.1222	59.6	0.04	0.046741	0.086741	0.099117
YDR376W	ARH1	-0.12	-0.02	62.5	51.2	57.5117	50.4951	0.1	-0.287712	-0.187712	-0.098008
YDR377W	ATP17	0.01	-0.15	566.8	562.7	570.742	507.134	-0.16	-0.0104738	-0.170474	-0.410359
YDR378C	LSM6	0.02	-0.04	446	484.9	452.226	471.64	-0.06	0.120644	0.0606435	0.250496
YDR379C-A	YDR379C-A	-0.51	0.19	33.5	31.3	23.5245	35.7059	0.7	-0.0979984	0.602002	-0.484508
YDR379W	RGA2	0.15	0.07	18.4	20.1	20.4161	21.0993	-0.08	0.12749	0.0474897	-0.043341
YDR381C-A	YDR381C-A	-0.26	-0.09	83.4	79.7	69.6463	74.88	0.17	-0.0654677	0.104532	-0.081986
YDR381W	YRA1	-0.17	-0.2	901.5	841	801.292	732.133	-0.03	-0.100222	-0.130222	0.149819
YDR382W	RPP2B	-0.19	-0.2	6178.9	4807	5416.46	4184.74	-0.01	-0.362213	-0.372213	-0.189752
YDR383C	NKP1	-0.26	0.01	68.2	66.6	56.953	67.0632	0.27	-0.0342496	0.23575	0.151947
YDR385W	EFT2	-0.01	-0.04	101.7	83.8	100.998	81.5085	-0.03	-0.279298	-0.309298	-0.320131
YDR388W	RVS167	-0.03	-0.08	130.2	128.7	127.521	121.758	-0.05	-0.0167174	-0.0667174	-0.012814
YDR389W	SAC7	0.1	-0.31	23.5	30.3	25.1867	24.4412	-0.41	0.366657	-0.043343	0.195728
YDR390C	UBA2	0.05	0.03	56.8	67	58.803	68.4078	-0.02	0.23827	0.21827	0.194862
YDR391C	YDR391C	0.18	0.01	52	46.3	58.91	46.622	-0.17	-0.167499	-0.337499	-0.86519
YDR392W	SPT3	-0.19	0.06	49.5	49.7	43.392	51.8105	0.25	0.00581733	0.255817	0.225474
YDR393W	SHE9	-0.01	-0.02	55.2	70.6	54.8187	69.628	-0.01	0.355	0.345	-0.106596
YDR394W	RPT3	-0.03	0.02	234.1	212.2	229.282	215.162	0.05	-0.1417	-0.0917003	0.029349
YDR395W	SXM1	0.12	0.15	66.5	69.5	72.2679	77.1151	0.03	0.0636586	0.0936586	-0.008558
YDR397C	NCB2	-0.06	0.03	171.4	155.5	164.418	158.767	0.09	-0.140453	-0.0504525	0.247809
YDR398W	UTP5	-0.03	0.11	92.7	92.6	90.7923	99.9365	0.14	-0.00155715	0.138443	0.008677
YDR399W	HPT1	-0.16	-0.12	649.9	856.5	581.677	788.141	0.04	0.398235	0.438235	0.07717
YDR400W	URH1	0.27	0.32	45.6	45.2	54.9848	56.4245	0.05	-0.0127111	0.0372889	-0.384893
YDR404C	RPB7	-0.03	0.16	150.2	142	147.109	158.655	0.19	-0.0809939	0.109006	0.045762
YDR405W	MRP20	0.01	-0.1	45.9	45.2	46.2193	42.1731	-0.11	-0.0221714	-0.132171	0.103183
YDR406W	PDR15	0.13	0.39	7	8.5	7.66006	11.1383	0.26	0.280108	0.540108	0.029801
YDR407C	TRS120	0.12	0.1	26.8	28.4	29.1245	30.4384	-0.02	0.0836579	0.0636579	0.021264
YDR408C	ADE8	-0.05	0.03	256	379.6	247.28	387.576	0.08	0.568336	0.648336	0.122106
YDR412W	RRP17	-0.09	0.12	144	141.3	135.291	153.556	0.21	-0.0273073	0.182693	0.111809
YDR418W	RPL12B	0.03	0.04	2642.9	2040	2698.43	2097.35	0.01	-0.373553	-0.363553	-0.185988
YDR419W	RAD30	-0.04	0.15	31.2	33.9	30.3468	37.6144	0.19	0.119739	0.309739	0.076871
YDR422C	SIP1	-0.01	0.2	20.9	22.9	20.7556	26.3052	0.21	0.131845	0.341845	-0.204836
YDR424C	DYN2	-0.26	-0.04	204.3	185.5	170.608	180.427	0.22	-0.13927	0.08073	-0.186205
YDR425W	SNX41	-0.04	-0.03	32.8	43.8	31.9031	42.8986	0.01	0.417235	0.427235	-0.2795
YDR427W	RPN9	0.02	0.03	282	293.7	285.937	299.871	0.01	0.0586481	0.0686481	0.093329
YDR429C	TIF35	-0.25	-0.09	716.8	659.1	602.755	619.239	0.16	-0.121073	0.0389267	-0.054666
YDR430C	CYM1	0.02	0.1	30.5	28.6	30.9258	30.6527	0.08	-0.0927941	-0.0127941	0.129009
YDR432W	NPL3	0.07	0.1	206.7	164.5	216.976	176.307	0.03	-0.329451	-0.299451	-0.116519
YDR434W	GPI17	0.12	0.16	110.7	105.9	120.302	118.321	0.04	-0.0639526	-0.0239526	-0.037687
YDR435C	PPM1	0.05	0.13	66.2	81.6	68.5345	89.2944	0.08	0.301738	0.381738	0.663774
YDR436W	PPZ2	-0.09	0.03	15.3	18	14.3747	18.3782	0.12	0.234465	0.354465	0.00285
YDR440W	DOT1	0.24	0.27	30.9	32	36.4927	38.5859	0.03	0.0504651	0.0804651	0.858584
YDR443C	SSN2	0.14	0.16	10.1	7.6	11.1292	8.49138	0.02	-0.410284	-0.390284	-0.430098
YDR444W	YDR444W	0.12	0.3	29.6	31.8	32.1674	39.1504	0.18	0.10343	0.28343	0.036572
YDR447C	RPS17B	-0.16	-0.24	4116	3290.8	3683.92	2786.47	-0.08	-0.322805	-0.402805	-0.303761
YDR448W	ADA2	0.05	0.14	38.5	35.7	39.8577	39.338	0.09	-0.108934	-0.0189344	0.070379
YDR449C	UTP6	0.16	0.38	69.8	75.8	77.9866	98.6417	0.22	0.118971	0.338971	-0.01968
YDR450W	RPS18A	-0.3	-0.27	5409.2	4056.9	4393.64	3364.47	0.03	-0.415037	-0.385037	-0.299074
YDR452W	PPN1	0.11	0.18	149.7	141	161.56	159.737	0.07	-0.0863791	-0.0163791	0.213711
YDR453C	TSA2	0.02	-0.03	13.5	14.6	13.6885	14.2995	-0.05	0.113009	0.063009	-0.892997
YDR454C	GUK1	-0.14	-0.04	560.5	512.9	508.664	498.875	0.1	-0.128037	-0.0280368	-0.289941
YDR456W	NHX1	0.05	0.1	43.3	46.2	44.827	49.5159	0.05	0.0935258	0.143526	-0.227964
YDR457W	TOM1	0.22	0.25	21.1	24.8	24.5759	29.4923	0.03	0.233097	0.263097	-0.002376
YDR458C	HEH2	0.11	0.28	53.6	54.5	57.8466	66.1736	0.17	0.0240232	0.194023	-0.042283
YDR460W	TFB3	-0.12	0.22	54.5	47.5	50.1502	55.3248	0.34	-0.198329	0.141671	0.120999
YDR461C-A	YDR461C-A	-0.43	-0.18	84.4	99.6	62.6469	87.9172	0.25	0.238903	0.488903	1.82619
YDR462W	MRPL28	-0.18	-0.15	99.4	102.9	87.7407	92.7387	0.03	0.0499252	0.0799252	0.075878
YDR463W	STP1	0.14	0.22	63.1	74.4	69.5302	86.6562	0.08	0.237663	0.317663	0.204172
YDR464W	SPP41	0.08	0.02	14.3	15.9	15.1154	16.122	-0.06	0.153012	0.0930116	-0.035319
YDR465C	RMT2	0.02	0.12	113.2	121.2	114.78	131.712	0.1	0.0985157	0.198516	-0.071887
YDR466W	PKH3	0.22	0.28	19.7	19	22.9453	23.0697	0.06	-0.0521962	0.00780379	-0.205139
YDR468C	TLG1	-0.08	0.07	125.6	132.7	118.825	139.297	0.15	0.0793319	0.229332	-0.360493
YDR469W	SDC1	-0.01	-0.17	123.6	121.8	122.746	108.261	-0.16	-0.0211646	-0.181165	-0.275854
YDR470C	UGO1	-0.3	0.1	19.4	15.4	15.7577	16.5053	0.4	-0.333126	0.0668737	-0.321876
YDR471W	RPL27B	-0.12	-0.16	2080.5	1651.9	1914.45	1478.49	-0.04	-0.332804	-0.372804	-0.239111
YDR472W	TRS31	-0.03	0.09	70	58	68.5594	61.7335	0.12	-0.271302	-0.151302	-0.118775
YDR473C	PRP3	-0.02	0.17	39.8	44.5	39.2521	50.0651	0.19	0.161037	0.351037	0.480854
YDR475C	JIP4	0.16	0.25	19.3	18.8	21.5636	22.3571	0.09	-0.0378682	0.0521318	0.026089
YDR476C	YDR476C	-0.07	-0.14	57.8	46.1	55.0625	41.8366	-0.07	-0.326303	-0.396303	-0.179754
YDR477W	SNF1	0.14	0.16	47.9	57.3	52.7813	64.0206	0.02	0.258509	0.278509	0.303241
YDR478W	SNM1	-0.12	0.02	37.4	39.8	34.415	40.3556	0.14	0.0897302	0.22973	-0.525977
YDR480W	DIG2	0.01	-0.08	30.6	30.2	30.8128	28.5709	-0.09	-0.0189831	-0.108983	-0.037438
YDR481C	PHO8	0.05	0	299.3	331.5	309.855	331.5	-0.05	0.147417	0.0974166	0.127025
YDR483W	KRE2	-0.09	-0.14	238.4	244.5	223.982	221.888	-0.05	0.0364502	-0.0135498	0.009079
YDR484W	VPS52	0.1	0.16	31.1	32.6	33.3322	36.4236	0.06	0.0679574	0.127957	-0.031612
YDR485C	VPS72	0.12	0.34	30.1	29.6	32.7107	37.4664	0.22	-0.0241663	0.195834	0.098886
YDR487C	RIB3	0	-0.05	586.6	774.7	586.6	748.311	-0.05	0.401261	0.351261	0.381714
YDR490C	PKH1	0.22	0.33	19.6	18.8	22.8288	23.6319	0.11	-0.060121	0.049879	-0.072686
YDR493W	MZM1	0.07	-0.09	91.6	108.4	96.154	101.844	-0.16	0.242945	0.0829453	0.333145
YDR494W	RSM28	-0.14	-0.01	142.3	146.9	129.14	145.885	0.13	0.0458987	0.175899	0.083015
YDR495C	VPS3	0.17	0.5	16.5	17.4	18.5635	24.6073	0.33	0.0766213	0.406621	-0.024119
YDR496C	PUF6	0.07	0.18	140.5	133.8	147.485	151.58	0.11	-0.070492	0.039508	-0.079279
YDR497C	ITR1	0.04	-0.05	1067.4	1067.1	1097.41	1030.75	-0.09	-0.000405536	-0.0904055	-0.148379
YDR498C	SEC20	-0.08	0	56.2	53.6	53.1684	53.6	0.08	-0.0683371	0.0116629	-0.13323
YDR499W	LCD1	0.25	0.4	26.5	23.6	31.514	31.1404	0.15	-0.167206	-0.0172055	0.139816
YDR500C	RPL37B	-0.04	0.03	3496.4	2803.3	3400.79	2862.2	0.07	-0.318744	-0.248744	-0.328556
YDR502C	SAM2	0.11	0.03	918.1	978.7	990.839	999.265	-0.08	0.0922154	0.0122154	-0.071695
YDR505C	PSP1	0.21	0.16	43.5	47.9	50.3159	53.5181	-0.05	0.13901	0.0890103	0.217703
YDR507C	GIN4	0.26	0.33	45.7	46.1	54.7248	57.9483	0.07	0.0125726	0.0825726	0.115589
YDR508C	GNP1	0.1	0.11	171.8	173.3	184.131	187.03	0.01	0.0125416	0.0225416	-0.399007
YDR510W	SMT3	0.1	0.19	355.4	318.2	380.908	362.991	0.09	-0.15951	-0.0695098	-0.09758
YDR511W	ACN9	0.04	-0.08	67.6	64.6	69.5005	61.1153	-0.12	-0.0654891	-0.185489	0.144449
YDR512C	EMI1	-0.2	-0.03	67.8	63.9	59.0233	62.585	0.17	-0.0854693	0.0845307	-0.24946
YDR513W	GRX2	-0.18	0.04	212.8	161.8	187.839	166.349	0.22	-0.395287	-0.175287	-0.663323
YDR514C	YDR514C	0.08	0.14	51.3	48.4	54.225	53.3322	0.06	-0.0839518	-0.0239518	0.093742
YDR515W	SLF1	0.15	0.14	41.9	39.3	46.491	43.3049	-0.01	-0.0924209	-0.102421	-0.080701
YDR516C	EMI2	0.09	0.13	84.4	51.3	89.8328	56.1373	0.04	-0.718284	-0.678284	-0.407454
YDR517W	GRH1	-0.11	-0.24	103.1	90.9	95.5312	76.9691	-0.13	-0.181692	-0.311692	-0.019386
YDR518W	EUG1	-0.1	0.02	55.2	42.6	51.5034	43.1947	0.12	-0.373815	-0.253815	-0.210691
YDR519W	FPR2	-0.27	-0.2	359	314.8	297.726	274.049	0.07	-0.189548	-0.119548	-0.284373
YDR520C	URC2	0.06	0.26	22.2	25.9	23.1427	31.0147	0.2	0.222392	0.422392	0.265814
YDR524C	AGE1	0	0.02	28.6	28.9	28.6	29.3034	0.02	0.0150543	0.0350543	-0.115205
YDR527W	RBA50	0.28	0.3	59.9	52.1	72.7303	64.1426	0.02	-0.201273	-0.181273	-0.462593
YDR529C	QCR7	-0.25	-0.36	738.6	665.9	621.086	518.846	-0.11	-0.149488	-0.259488	-0.358347
YDR530C	APA2	0.15	0.06	48.1	52.4	53.3703	54.6252	-0.09	0.12353	0.0335299	0.429984
YDR531W	CAB1	-0.04	0.17	191.1	253.7	185.874	285.427	0.21	0.408796	0.618796	0.724894
YDR532C	KRE28	-0.02	0.16	45.4	46.1	44.775	51.5069	0.18	0.0220745	0.202074	0.221247
YDR533C	HSP31	0.1	0.06	59.1	58.2	63.3418	60.6715	-0.04	-0.022139	-0.062139	-1.70255
YDR539W	FDC1	0.03	0.1	67.4	60.9	68.8162	65.271	0.07	-0.146306	-0.0763064	-0.129752
YEL001C	IRC22	-0.1	-0.06	311.4	623.2	290.546	597.813	0.04	1.00093	1.04093	1.17523
YEL002C	WBP1	0.02	0.13	205.8	370.6	208.673	405.545	0.11	0.84862	0.95862	0.611909
YEL003W	GIM4	-0.15	0.19	299.5	517.7	269.925	590.573	0.34	0.78956	1.12956	0.428578
YEL006W	YEA6	-0.04	-0.07	100.4	229.3	97.6546	218.44	-0.03	1.19148	1.16148	1.25742
YEL007W	YEL007W	0.37	0.31	37.5	52.9	48.4632	65.5805	-0.06	0.496377	0.436377	0.274598
YEL009C	GCN4	-0.08	-0.24	1398.6	2885.4	1323.16	2443.2	-0.16	1.04479	0.884788	0.988814
YEL011W	GLC3	-0.1	-0.11	16.9	38.3	15.7683	35.4883	-0.01	1.18032	1.17032	0.517965
YEL012W	UBC8	0.07	0.14	50.6	103.1	53.1157	113.606	0.07	1.02684	1.09684	1.43965
YEL013W	VAC8	0.15	0.25	103.4	201.1	114.729	239.15	0.1	0.959677	1.05968	1.02046
YEL015W	EDC3	0.01	0.06	118.7	247.6	119.526	258.115	0.05	1.06069	1.11069	1.1676
YEL017W	GTT3	0.13	0.16	33.6	73.7	36.7683	82.3441	0.03	1.1332	1.1632	1.2892
YEL018W	EAF5	-0.26	0.07	71.4	131.1	59.6253	137.618	0.33	0.876672	1.20667	0.699334
YEL019C	MMS21	0.06	0.19	5.9	15.3	6.15055	17.4537	0.13	1.37474	1.50474	-0.634708
YEL020C	YEL020C	-0.11	0.07	17	38.1	15.752	39.9942	0.18	1.16426	1.34426	0.651554
YEL020W-A	TIM9	-0.05	-0.13	574.8	1141.7	555.22	1043.32	-0.08	0.990052	0.910052	1.08973
YEL021W	URA3	-0.21	-0.07	989.1	8331.7	855.114	7937.09	0.14	3.07442	3.21442	3.14981
YEL022W	GEA2	0.31	0.38	38.4	75.4	47.6048	98.1212	0.07	0.973458	1.04346	1.12994
YEL024W	RIP1	-0.17	-0.24	215.6	366.9	191.634	310.671	-0.07	0.76703	0.69703	0.195957
YEL026W	SNU13	0.26	0.34	482.5	620.4	577.783	785.275	0.08	0.36267	0.44267	0.019509
YEL029C	BUD16	-0.05	0.02	94.6	278.3	91.3776	282.185	0.07	1.55673	1.62673	1.3904
YEL030W	ECM10	-0.05	0.08	12.5	31.5	12.0742	33.2961	0.13	1.33342	1.46342	-0.117383
YEL031W	SPF1	0.17	0.16	69	142.2	77.629	158.878	-0.01	1.04325	1.03325	1.12495
YEL032W	MCM3	0.27	0.16	26.8	56.3	32.3156	62.9033	-0.11	1.0709	0.960902	1.02909
YEL034W	HYP2	0.02	-0.12	4600.9	7000	4665.13	6441.31	-0.14	0.605439	0.465439	0.657934
YEL036C	ANP1	-0.14	-0.25	72.5	137.4	65.7951	115.539	-0.11	0.922329	0.812329	0.397664
YEL037C	RAD23	0.08	0.11	156.7	265.3	165.635	286.319	0.03	0.759619	0.789619	0.946964
YEL038W	UTR4	-0.12	-0.12	179.2	340.9	164.898	313.692	0	0.927778	0.927778	0.761994
YEL039C	CYC7	-0.1	-0.01	118.8	185.1	110.844	183.821	0.09	0.63977	0.72977	0.540351
YEL040W	UTR2	-0.11	-0.23	503.1	1123.3	466.166	957.765	-0.12	1.15883	1.03883	1.1508
YEL042W	GDA1	0.14	0.19	74	143.7	81.541	163.928	0.05	0.957463	1.00746	0.813924
YEL043W	YEL043W	0.25	0.1	17	33.3	20.2165	35.6901	-0.15	0.969987	0.819987	0.506811
YEL044W	IES6	-0.08	-0.33	178.1	414.7	168.493	329.909	-0.25	1.21938	0.969381	0.321579
YEL046C	GLY1	0.19	0.06	166.4	338.4	189.823	352.77	-0.13	1.02407	0.894074	0.760404
YEL047C	YEL047C	-0.02	0	91.3	291.9	90.043	291.9	0.02	1.67679	1.69679	1.32078
YEL050C	RML2	-0.01	0.11	113	187	112.219	201.816	0.12	0.726715	0.846715	0.060167
YEL051W	VMA8	0.09	0.17	575.9	1099.1	612.971	1236.55	0.08	0.932432	1.01243	0.498296
YEL052W	AFG1	0.13	0.07	60.9	80.6	66.6425	84.6072	-0.06	0.404338	0.344338	0.806194
YEL053C	MAK10	0.19	0.27	20.2	48.2	23.0434	58.1199	0.08	1.25468	1.33468	1.06079
YEL054C	RPL12A	-0.11	-0.01	2264.7	3136.8	2098.44	3115.13	0.1	0.469974	0.569974	-0.180796
YEL055C	POL5	0.28	0.44	53.3	102.7	64.7166	139.323	0.16	0.946229	1.10623	1.0199
YEL056W	HAT2	-0.13	-0.05	77.9	145	71.1875	140.061	0.08	0.896358	0.976358	0.992234
YEL058W	PCM1	0.02	-0.04	244.4	447.3	247.812	435.069	-0.06	0.871998	0.811998	1.06324
YEL060C	PRB1	-0.1	-0.1	41.4	81.5	38.6276	76.0422	0	0.977169	0.977169	0.267149
YEL061C	CIN8	0.2	0.18	25.2	52.6	28.9472	59.5897	-0.02	1.06164	1.04164	1.09131
YEL062W	NPR2	0.04	-0.05	14	33.9	14.3936	32.7452	-0.09	1.27586	1.18586	0.644974
YEL065W	SIT1	0.11	0.01	285.3	307.5	307.904	309.639	-0.1	0.108107	0.00810666	0.696434
YEL066W	HPA3	0.09	-0.1	75.7	160.5	80.5728	149.752	-0.19	1.08421	0.894208	1.02705
YEL071W	DLD3	0.2	0.26	1022.5	2276.9	1174.54	2726.54	0.06	1.15497	1.21497	1.55205
YER001W	MNN1	0.1	0.16	173.5	386.8	185.953	432.167	0.06	1.15665	1.21665	0.808584
YER002W	NOP16	-0.05	0.21	190	317.9	183.528	367.711	0.26	0.742574	1.00257	0.757254
YER003C	PMI40	0.07	-0.01	194.9	349.8	204.59	347.384	-0.08	0.843796	0.763796	0.859434
YER004W	FMP52	-0.03	-0.11	176.3	348.2	172.672	322.638	-0.08	0.981884	0.901884	1.04516
YER005W	YND1	0.02	0.12	39.2	86.9	39.7472	94.4373	0.1	1.1485	1.2485	1.28514
YER006W	NUG1	0.08	0.05	189	362.9	199.776	375.698	-0.03	0.941186	0.911186	1.03586
YER007C-A	TMA20	-0.2	-0.29	248.6	388.3	216.419	317.591	-0.09	0.643345	0.553345	0.777864
YER007W	PAC2	0.19	0.28	19.3	36.8	22.0167	44.6824	0.09	0.931105	1.0211	0.612036
YER008C	SEC3	0.14	0.25	23	51.2	25.3438	60.8874	0.11	1.15451	1.26451	0.790744
YER010C	YER010C	-0.22	-0.23	70.8	166.9	60.7864	142.305	-0.01	1.23716	1.22716	1.15506
YER012W	PRE1	0.1	0.05	254.4	447.6	272.659	463.385	-0.05	0.815111	0.765111	0.976294
YER013W	PRP22	0.24	0.21	18.1	41	21.376	47.4242	-0.03	1.17963	1.14963	1.19234
YER014W	HEM14	0.09	0.16	39.7	74	42.2555	82.6792	0.07	0.898386	0.968386	0.854584
YER015W	FAA2	0.17	0.12	10.6	24.4	11.9256	26.5163	-0.05	1.20282	1.15282	1.06207
YER016W	BIM1	-0.06	0.12	116.3	220.6	111.562	239.734	0.18	0.923582	1.10358	1.06137
YER017C	AFG3	0.24	0.2	40.8	82.3	48.1845	94.5379	-0.04	1.01232	0.972323	0.566818
YER019W	ISC1	-0.2	-0.13	31.9	66.2	27.7706	60.4956	0.07	1.05327	1.12327	0.834284
YER020W	GPA2	0.17	0.19	62	104.8	69.7536	119.552	0.02	0.757299	0.777299	0.825254
YER021W	RPN3	0.09	0.22	244.7	414.2	260.451	482.433	0.13	0.759313	0.889313	0.51359
YER022W	SRB4	0.04	0.04	51.7	96.4	53.1535	99.1102	0	0.898869	0.898869	0.623955
YER023W	PRO3	-0.08	-0.09	438.9	847.2	415.225	795.964	-0.01	0.94881	0.93881	1.05989
YER024W	YAT2	0.02	-0.03	65	250.4	65.9074	245.247	-0.05	1.94572	1.89572	2.30416
YER025W	GCD11	0.19	0.15	249	436.5	284.05	484.327	-0.04	0.809836	0.769836	0.756094
YER027C	GAL83	0.32	0.28	59.2	111.7	73.9012	135.626	-0.04	0.91596	0.87596	0.573948
YER029C	SMB1	-0.35	0.12	89.4	173.9	70.1418	188.983	0.47	0.959911	1.42991	0.675214
YER030W	CHZ1	-0.33	-0.05	231.5	350.5	184.167	338.561	0.28	0.598402	0.878402	0.608356
YER031C	YPT31	0.08	0.06	295	474.6	311.82	494.754	-0.02	0.685997	0.665997	0.850344
YER032W	FIR1	0.24	0.28	11.1	22.9	13.109	27.8051	0.04	1.04479	1.08479	0.942134
YER033C	ZRG8	0.12	0.29	5.2	10.2	5.65102	12.4709	0.17	0.971986	1.14199	0.931754
YER034W	YER034W	0.11	-0.08	42.5	111.7	45.8672	105.675	-0.19	1.39409	1.20409	1.46031
YER036C	ARB1	0.15	0.2	275.5	428.3	305.686	491.988	0.05	0.636569	0.686569	0.789974
YER037W	PHM8	0.01	-0.04	118.4	167.2	119.224	162.628	-0.05	0.497906	0.447906	0.140501
YER040W	GLN3	0.31	0.11	23.6	66.7	29.2571	71.9845	-0.2	1.4989	1.2989	1.22502
YER042W	MXR1	0.26	0.31	83.3	260.2	99.75	322.572	0.05	1.64323	1.69323	1.24536
YER043C	SAH1	0.43	0.31	962.9	1660.7	1297.25	2058.78	-0.12	0.786334	0.666334	0.895114
YER044C	ERG28	0.19	0.04	409.8	821.4	467.485	844.493	-0.15	1.00316	0.853165	0.879594
YER047C	SAP1	0.09	0.19	16	38.6	17.0299	44.0335	0.1	1.27053	1.37053	1.11595
YER048C	CAJ1	-0.09	0.02	191.3	333.4	179.731	338.054	0.11	0.801417	0.911417	1.0143
YER048W-A	ISD11	-0.06	-0.03	330.6	566.2	317.133	554.548	0.03	0.776225	0.806225	0.461316
YER049W	TPA1	0.02	0	222.3	389.3	225.403	389.3	-0.02	0.808374	0.788374	0.919674
YER050C	RSM18	-0.25	-0.23	213.2	441.6	179.279	376.524	0.02	1.05053	1.07053	0.462706
YER052C	HOM3	0.19	0.1	173.2	392.1	197.58	420.242	-0.09	1.17878	1.08878	1.25353
YER053C	PIC2	-0.04	-0.03	39.5	91.8	38.4199	89.9108	0.01	1.21664	1.22664	0.251699
YER055C	HIS1	-0.16	-0.19	1832.1	4636.3	1639.78	4064.21	-0.03	1.33948	1.30948	1.43713
YER056C	FCY2	0.02	0.02	327.6	814.3	332.173	825.667	0	1.31363	1.31363	1.05118
YER056C-A	RPL34A	0.06	0.1	1420.2	2180.1	1480.51	2336.57	0.04	0.6183	0.6583	-0.295725
YER057C	HMF1	0.11	0.05	419.2	811.5	452.412	840.117	-0.06	0.952952	0.892952	0.437989
YER058W	PET117	-0.24	-0.12	68.4	99.5	57.9174	91.5587	0.12	0.5407	0.6607	0.841924
YER059W	PCL6	0.02	0.07	41.6	68	42.1807	71.3807	0.05	0.708951	0.758951	0.880664
YER061C	CEM1	0.1	0.05	50.7	116.2	54.3389	120.298	-0.05	1.19655	1.14655	1.31002
YER062C	HOR2	0.02	0	116.5	103.6	118.126	103.6	-0.02	-0.169306	-0.189306	0.123642
YER063W	THO1	0.08	0.23	142.2	194.9	150.308	228.586	0.15	0.454813	0.604813	0.878554
YER065C	ICL1	-0.2	0	16.8	32.6	14.6252	32.6	0.2	0.956411	1.15641	-0.452269
YER067W	RGI1	-0.08	-0.01	30.3	48.5	28.6655	48.165	0.07	0.678667	0.748667	-0.308933
YER068W	MOT2	0.21	0.25	33.7	66.8	38.9804	79.439	0.04	0.9871	1.0271	0.216795
YER069W	ARG5,6	0.25	0.23	195.3	351.1	232.252	411.782	-0.02	0.84619	0.82619	0.692504
YER070W	RNR1	0.14	0.13	122.7	223.6	135.204	244.684	-0.01	0.865785	0.855785	0.738454
YER071C	YER071C	-0.24	-0.01	94.8	221.9	80.2715	220.367	0.23	1.22695	1.45695	0.784834
YER073W	ALD5	0.12	0.18	590.6	1678.1	641.826	1901.09	0.06	1.50658	1.56658	1.59829
YER074W	RPS24A	-0.18	-0.14	3287.9	4883.6	2902.24	4431.96	0.04	0.570779	0.610779	-0.242536
YER075C	PTP3	0.19	0.47	15.5	25.8	17.6818	35.7358	0.28	0.735103	1.0151	0.683404
YER077C	YER077C	0.26	0.21	39.3	81.9	47.0609	94.7328	-0.05	1.05933	1.00933	0.823804
YER078C	ICP55	0.14	0.18	56.3	119.1	62.0373	134.926	0.04	1.08097	1.12097	1.26049
YER079W	YER079W	0.13	-0.08	30.3	85.7	33.1571	81.0771	-0.21	1.49998	1.28998	0.990044
YER080W	AIM9	-0.01	0.2	58.2	91.7	57.798	105.336	0.21	0.655903	0.865903	0.979144
YER081W	SER3	0.09	0.03	235.3	420.2	250.446	429.029	-0.06	0.836575	0.776575	0.568375
YER082C	UTP7	0.21	0.11	93.1	192.8	107.688	208.075	-0.1	1.05025	0.950252	0.896484
YER083C	GET2	0.08	0.02	69.2	180.1	73.1456	182.614	-0.06	1.37995	1.31995	1.04359
YER086W	ILV1	0.16	0.12	179.9	432.7	201	470.23	-0.04	1.26617	1.22617	1.22809
YER087C-B	SBH1	-0.03	0.17	278	476.3	272.279	535.865	0.2	0.776786	0.976786	0.742064
YER087W	AIM10	0.01	0	33.2	63.3	33.4309	63.3	-0.01	0.931022	0.921022	1.12811
YER088C	DOT6	0.33	0.21	33.2	56.9	41.7328	65.8156	-0.12	0.777245	0.657245	0.153935
YER089C	PTC2	0.24	0.13	44.1	101.6	52.0818	111.18	-0.11	1.20405	1.09405	1.16073
YER090W	TRP2	0.29	0.36	233.3	584	285.242	749.521	0.07	1.32378	1.39378	1.41004
YER091C	MET6	0.23	0.05	515.1	971.4	604.127	1005.66	-0.18	0.915213	0.735213	0.58684
YER092W	IES5	-0.1	0.06	177.9	393.6	165.987	410.315	0.16	1.14566	1.30566	0.146121
YER093C-A	AIM11	-0.33	-0.17	25	43.6	19.8884	38.7535	0.16	0.8024	0.9624	0.954274
YER094C	PUP3	-0.19	-0.23	629.5	1161.6	551.823	990.421	-0.04	0.883835	0.843835	0.720514
YER095W	RAD51	-0.07	-0.01	82.4	132.1	78.4974	131.188	0.06	0.680914	0.740914	0.899274
YER098W	UBP9	0.1	0.24	9.3	15.9	9.96749	18.7778	0.14	0.773724	0.913724	-2.73931
YER099C	PRS2	0.07	0.12	104.4	250.9	109.59	272.662	0.05	1.26499	1.31499	1.13793
YER100W	UBC6	-0.04	0.14	120.8	224.6	117.497	247.488	0.18	0.894737	1.07474	0.750144
YER101C	AST2	0	-0.06	15.2	32.4	15.2	31.0802	-0.06	1.09192	1.03192	0.646104
YER102W	RPS8B	-0.34	-0.2	1314.3	1929.8	1038.35	1679.99	0.14	0.554157	0.694157	-0.232224
YER103W	SSA4	-0.17	-0.05	23.8	58.1	21.1545	56.1209	0.12	1.28758	1.40758	0.309611
YER105C	NUP157	0.21	0.2	40.6	94.3	46.9615	108.322	-0.01	1.21578	1.20578	0.950554
YER107C	GLE2	-0.01	0	122.8	236.6	121.952	236.6	0.01	0.94614	0.95614	1.17539
YER110C	KAP123	0.16	0.07	89	177.1	99.4386	185.905	-0.09	0.992687	0.902687	0.747074
YER111C	SWI4	0.19	0.17	16	26.5	18.2522	29.814	-0.02	0.72792	0.70792	0.529382
YER112W	LSM4	0.12	0.24	176.5	299.2	191.809	353.353	0.12	0.761442	0.881442	0.291251
YER113C	TMN3	0.17	0.08	32.5	62.3	36.5644	65.8522	-0.09	0.938792	0.848792	0.734444
YER114C	BOI2	0.13	0.01	21.3	50.8	23.3085	51.1533	-0.12	1.25398	1.13398	1.00091
YER117W	RPL23B	-0.2	-0.24	5002.5	8025	4354.93	6795.13	-0.04	0.681852	0.641852	-0.253057
YER120W	SCS2	0.14	0.15	232	468.7	255.642	520.055	0.01	1.01454	1.02454	1.00072
YER122C	GLO3	0.03	0.12	245.1	459.5	250.25	499.355	0.09	0.906694	0.996694	0.805974
YER123W	YCK3	0.19	-0.08	24.2	54	27.6065	51.0871	-0.27	1.15795	0.887952	1.36176
YER125W	RSP5	0.16	0.21	54.8	96.5	61.2273	111.62	0.05	0.816353	0.866353	0.943374
YER126C	NSA2	-0.14	-0.03	296.3	531.3	268.898	520.366	0.11	0.842468	0.952468	0.471973
YER127W	LCP5	0.1	0.13	92.1	207.7	98.7103	227.285	0.03	1.17323	1.20323	0.073021
YER128W	YER128W	-0.06	-0.07	46.8	109.7	44.8936	104.504	-0.01	1.22898	1.21898	1.14939
YER129W	SAK1	0.11	0.21	22.3	52.1	24.0668	60.2635	0.1	1.22424	1.32424	1.27043
YER131W	RPS26B	0.06	0.13	2363.7	3464.6	2464.08	3791.29	0.07	0.551642	0.621642	-0.27173
YER132C	PMD1	0.1	0.15	9	21.6	9.64596	23.9667	0.05	1.26303	1.31303	0.989284
YER133W	GLC7	-0.1	0.04	624.2	1130.6	582.399	1162.39	0.14	0.857008	0.997008	0.765554
YER134C	YER134C	-0.04	0.08	101.2	199.4	98.4327	210.769	0.12	0.978456	1.09846	1.19555
YER136W	GDI1	0.12	0.03	178.7	322.3	194.2	329.072	-0.09	0.850865	0.760865	0.941964
YER137C	YER137C	-0.08	0.36	19.7	33.5	18.6373	42.9948	0.44	0.765965	1.20597	1.04289
YER139C	RTR1	-0.09	0.05	49.1	96.3	46.1306	99.696	0.14	0.971813	1.11181	0.896704
YER141W	COX15	0.07	0.12	118.5	280	124.391	304.286	0.05	1.24054	1.29054	1.16219
YER142C	MAG1	-0.2	0.09	27.8	43.6	24.2013	46.4065	0.29	0.649243	0.939243	0.618762
YER143W	DDI1	-0.01	0.01	62.1	119.8	61.671	120.633	0.02	0.947963	0.967963	1.06083
YER144C	UBP5	0.31	0.14	15.3	31.8	18.9675	35.0406	-0.17	1.0555	0.885495	0.838624
YER145C	FTR1	-0.01	0.1	475.3	519.1	472.017	556.358	0.11	0.127174	0.237174	0.093409
YER146W	LSM5	-0.15	-0.22	371.3	656.1	334.634	563.305	-0.07	0.82133	0.75133	0.307062
YER148W	SPT15	-0.08	0.03	309.1	564.2	292.426	576.055	0.11	0.868133	0.978133	0.791674
YER149C	PEA2	0.09	0	45.3	95.1	48.216	95.1	-0.09	1.06993	0.979934	0.687704
YER151C	UBP3	0.28	0.39	30.8	52	37.3972	68.1405	0.11	0.755581	0.865581	0.268933
YER152C	YER152C	-0.08	-0.21	45.6	113.1	43.1402	97.7792	-0.13	1.31049	1.18049	1.65093
YER154W	OXA1	0.01	0.09	42.1	82.1	42.3928	87.3848	0.08	0.963562	1.04356	1.07284
YER155C	BEM2	0.11	0.21	37	77.8	39.9314	89.9903	0.1	1.07224	1.17224	1.11515
YER156C	YER156C	0	-0.06	190.9	444.9	190.9	426.777	-0.06	1.22066	1.16066	1.24288
YER157W	COG3	-0.06	0.05	47.5	96.2	45.565	99.5925	0.11	1.01811	1.12811	0.553092
YER159C	BUR6	-0.02	0.08	159.5	298.7	157.304	315.731	0.1	0.905141	1.00514	0.571471
YER161C	SPT2	-0.12	0.22	78.2	149.5	71.9587	174.128	0.34	0.934905	1.2749	1.05366
YER162C	RAD4	-0.11	0.19	20.3	46.8	18.8097	53.3877	0.3	1.20503	1.50503	1.6238
YER163C	YER163C	-0.1	-0.02	88.3	153.2	82.3868	151.091	0.08	0.794931	0.874931	0.908364
YER164W	CHD1	0.27	0.34	17	28.2	20.4987	35.6943	0.07	0.73016	0.80016	0.677394
YER165W	PAB1	0.25	0.16	263.5	459	313.356	512.835	-0.09	0.800691	0.710691	0.183033
YER166W	DNF1	0.09	0.25	23.4	38.1	24.9063	45.3088	0.16	0.703282	0.863282	0.760184
YER167W	BCK2	0.15	0.06	29.4	49	32.6213	51.0808	-0.09	0.736966	0.646966	0.145098
YER168C	CCA1	0.17	0.42	66.9	134.4	75.2664	179.817	0.25	1.00646	1.25646	1.09392
YER169W	RPH1	0.04	0.01	18.2	38.4	18.7117	38.6671	-0.03	1.07717	1.04717	1.03441
YER171W	RAD3	0.02	-0.05	34.8	75.3	35.2858	72.735	-0.07	1.11356	1.04356	1.06698
YER172C	BRR2	0.39	0.29	15.1	32	19.7869	39.1245	-0.1	1.08352	0.983523	1.08969
YER174C	GRX4	-0.01	0.1	138.3	451.7	137.345	484.12	0.11	1.70756	1.81756	0.832544
YER175C	TMT1	0.03	0.18	457.2	1391.7	466.807	1576.63	0.15	1.60595	1.75595	1.70771
YER176W	ECM32	0.31	0.34	35.1	97	43.5137	122.778	0.03	1.46651	1.49651	1.10743
YER177W	BMH1	-0.05	-0.09	1731.2	2655.2	1672.23	2494.62	-0.04	0.617048	0.577048	0.544316
YER178W	PDA1	0.26	0.18	255	567.8	305.357	643.251	-0.08	1.15489	1.07489	0.37507
YER182W	FMP10	-0.04	-0.13	76.7	172.3	74.6026	157.453	-0.09	1.16762	1.07762	1.05735
YER183C	FAU1	0.09	0.02	108.6	238.8	115.591	242.134	-0.07	1.13678	1.06678	0.998864
YFL001W	DEG1	-0.1	-0.13	52	53.7	48.5177	49.0727	-0.03	0.0464105	0.0164105	-0.029089
YFL002C	SPB4	0.13	0.33	46.3	45.8	50.6658	57.5712	0.2	-0.0156646	0.184335	-0.022973
YFL004W	VTC2	0.19	0.31	259	258.3	295.458	320.216	0.12	-0.00390445	0.116096	0.061346
YFL005W	SEC4	-0.15	-0.16	482.2	467.2	434.583	418.156	-0.01	-0.0455914	-0.0555914	0.128085
YFL007W	BLM10	0.07	0.11	28	25.3	29.3921	27.3045	0.04	-0.146289	-0.106289	-0.379776
YFL008W	SMC1	0.28	0.47	33.3	31.9	40.4327	44.185	0.19	-0.0619658	0.128034	-0.149198
YFL009W	CDC4	0.23	0.25	42.3	44.7	49.6109	53.1576	0.02	0.0796172	0.0996172	0.06393
YFL013C	IES1	0.05	0.23	39.3	38.7	40.6859	45.3887	0.18	-0.0221957	0.157804	-0.122956
YFL014W	HSP12	-0.17	-0.24	61	89	54.2194	75.3603	-0.07	0.544996	0.474996	-2.62656
YFL016C	MDJ1	-0.21	-0.16	145.1	157.1	125.444	140.608	0.05	0.114636	0.164636	0.211663
YFL017C	GNA1	-0.06	0.15	143.8	110.6	137.942	122.718	0.21	-0.378712	-0.168712	-0.265029
YFL018C	LPD1	0.08	0.2	211.5	246	223.559	282.58	0.12	0.218001	0.338001	0.251308
YFL021W	GAT1	0.17	0.1	67.3	134.1	75.7164	143.725	-0.07	0.994631	0.924631	1.02278
YFL022C	FRS2	0.15	0.04	172.9	169.8	191.845	174.574	-0.11	-0.0261014	-0.136101	-0.097393
YFL023W	BUD27	0.07	0.36	23	22.3	24.1435	28.6204	0.29	-0.0445902	0.24541	-0.08881
YFL024C	EPL1	0.25	0.35	14.8	15.9	17.6003	20.2655	0.1	0.10343	0.20343	0.189845
YFL026W	STE2	0.11	0.12	303.3	351.5	327.33	381.987	0.01	0.212779	0.222779	-0.067322
YFL027C	GYP8	-0.03	0.06	53.7	61.7	52.5949	64.3201	0.09	0.200348	0.290348	0.212488
YFL028C	CAF16	-0.23	-0.18	202.2	228.1	172.403	201.345	0.05	0.173883	0.223883	-0.057439
YFL029C	CAK1	-0.05	0.03	33.6	29.8	32.4555	30.4262	0.08	-0.173149	-0.0931489	-0.068703
YFL030W	AGX1	-0.11	-0.55	15.3	25.8	14.1768	17.6219	-0.44	0.753839	0.313839	-0.322775
YFL033C	RIM15	0.14	0.09	9	11.6	9.91715	12.3467	-0.05	0.366128	0.316128	-0.199743
YFL034C-A	RPL22B	-0.04	-0.03	494.1	540.4	480.589	529.279	0.01	0.129225	0.139225	-0.009765
YFL034C-B	MOB2	0.22	0.18	31.5	33.4	36.6891	37.8383	-0.04	0.0844963	0.0444963	-0.044358
YFL034W	YFL034W	0.07	-0.02	15.2	14.7	15.9557	14.4976	-0.09	-0.0482552	-0.138255	0.039845
YFL036W	RPO41	0.28	0.26	23.9	22	29.0193	26.3445	-0.02	-0.119507	-0.139507	-0.336032
YFL037W	TUB2	0.04	-0.06	164.4	149.6	169.022	143.506	-0.1	-0.1361	-0.2361	-0.007172
YFL038C	YPT1	-0.01	0.05	663	609.6	658.42	631.097	0.06	-0.121146	-0.061146	-0.019759
YFL039C	ACT1	0.05	-0.13	1015.5	957.7	1051.31	875.176	-0.18	-0.0845445	-0.264545	-0.028255
YFL041W	FET5	0.25	0.18	42.2	39.4	50.1845	44.6356	-0.07	-0.0990474	-0.169047	-0.151375
YFL042C	YFL042C	0.02	-0.01	16.1	23.2	16.3247	23.0397	-0.03	0.527064	0.497064	-0.022556
YFL044C	OTU1	-0.04	0.04	41.2	37.1	40.0734	38.143	0.08	-0.151225	-0.0712252	-0.127919
YFL045C	SEC53	-0.16	-0.15	1405.2	1135.8	1257.69	1023.64	0.01	-0.307067	-0.297067	-0.563031
YFL046W	FMP32	-0.11	0.1	81.9	101.5	75.8876	108.785	0.21	0.309544	0.519544	0.034987
YFL047W	RGD2	0.21	0.4	48	49.8	55.521	65.7115	0.19	0.0531113	0.243111	0.368026
YFL048C	EMP47	0.04	-0.02	171.1	187.8	175.91	185.215	-0.06	0.134357	0.0743573	-0.029845
YFL049W	SWP82	0.22	0.26	42.6	41.3	49.6177	49.4559	0.04	-0.0447116	-0.00471165	-0.023833
YFL050C	ALR2	0.26	0.17	14.1	17	16.8844	19.126	-0.09	0.26984	0.17984	0.088616
YFL059W	SNZ3	-0.1	n/a	3.6	1.7	3.35892			-1.08246		-1.55518
YFR001W	LOC1	-0.25	-0.05	277.2	257	233.096	248.246	0.2	-0.109159	0.0908411	-0.053383
YFR002W	NIC96	0.33	0.37	64.1	67.3	80.5746	86.9753	0.04	0.0702821	0.110282	0.08272
YFR004W	RPN11	-0.04	0.06	289.8	260.1	281.875	271.145	0.1	-0.155991	-0.0559912	0.054752
YFR005C	SAD1	0.1	0.03	38.4	46.7	41.1561	47.6813	-0.07	0.282316	0.212316	0.458495
YFR006W	YFR006W	-0.13	0.03	81.7	99.3	74.66	101.387	0.16	0.281458	0.441458	0.450533
YFR007W	YFH7	0.1	0.06	21.9	21.2	23.4718	22.1003	-0.04	-0.0468666	-0.0868666	0.129417
YFR009W	GCN20	0.04	0.11	129.6	119.8	133.244	129.292	0.07	-0.113438	-0.0434378	-0.035201
YFR010W	UBP6	0.05	0.2	163.9	150	169.68	172.305	0.15	-0.127853	0.0221466	-0.00208
YFR011C	AIM13	0.17	0.27	127.2	131.1	143.107	158.081	0.1	0.043569	0.143569	0.157985
YFR013W	IOC3	-0.05	-0.05	36	37.9	34.7737	36.609	0	0.0742009	0.0742009	0.13071
YFR014C	CMK1	-0.02	-0.16	46.8	46.7	46.1557	41.7977	-0.14	-0.00308598	-0.143086	-0.35849
YFR015C	GSY1	0.19	0.14	12.8	10.2	14.6018	11.2394	-0.05	-0.327575	-0.377575	-0.196405
YFR016C	YFR016C	0.17	0.27	26.8	20	30.1516	24.1162	0.1	-0.422233	-0.322233	-0.592652
YFR019W	FAB1	0.27	0.21	11.4	13.6	13.7462	15.731	-0.06	0.254573	0.194573	0.485063
YFR021W	ATG18	0.12	0.08	16.7	17	18.1485	17.9693	-0.04	0.0256866	-0.0143134	-0.255383
YFR024C-A	LSB3	-0.01	-0.07	123.9	106.1	123.044	101.075	-0.06	-0.223752	-0.283752	-0.131971
YFR025C	HIS2	-0.21	-0.23	167.1	211.2	144.464	180.076	-0.02	0.337898	0.317898	-0.126735
YFR028C	CDC14	0.08	0	81.1	85.5	85.7242	85.5	-0.08	0.0762225	-0.00377749	0.117951
YFR029W	PTR3	0.12	0.03	10.3	11.4	11.1934	11.6395	-0.09	0.146389	0.0563895	0.318965
YFR030W	MET10	0.15	0.2	50.1	116.5	55.5894	133.823	0.05	1.21745	1.26745	1.26123
YFR031C	SMC2	0.21	0.25	26.4	29.1	30.5366	34.6059	0.04	0.140481	0.180481	0.085254
YFR031C-A	RPL2A	-0.07	-0.02	1522.8	1016.2	1450.68	1002.21	0.05	-0.583542	-0.533542	-0.215089
YFR033C	QCR6	-0.21	-0.15	463.6	351.8	400.799	317.06	0.06	-0.398125	-0.338125	-0.326315
YFR034C	PHO4	0.11	-0.12	56.3	61.9	60.7605	56.9596	-0.23	0.136804	-0.0931955	-0.027402
YFR037C	RSC8	-0.09	-0.02	162.2	153.9	152.391	151.781	0.07	-0.0757806	-0.00578059	0.03551
YFR038W	IRC5	0.17	0.3	32.3	32.3	36.3394	39.766	0.13	0	0.13	0.315576
YFR039C	YFR039C	0.11	0.31	77.8	78.5	83.964	97.3171	0.2	0.0129225	0.212922	0.220677
YFR040W	SAP155	0.24	0.23	28.8	31	34.0126	36.3579	-0.01	0.106199	0.0961994	-0.169619
YFR041C	ERJ5	-0.06	0.35	109.9	86.3	105.423	109.995	0.41	-0.348759	0.0612411	0.09651
YFR043C	IRC6	0.12	0.3	39.5	42.4	42.926	52.2005	0.18	0.102212	0.282212	0.145692
YFR044C	DUG1	-0.01	0	127.5	138	126.619	138	0.01	0.114171	0.124171	0.074697
YFR047C	BNA6	0.07	0.18	143.7	203.6	150.844	230.655	0.11	0.502677	0.612677	0.277287
YFR049W	YMR31	0.13	0.12	147.9	194.5	161.846	211.37	-0.01	0.395148	0.385148	0.309254
YFR050C	PRE4	-0.13	-0.15	324.4	294.2	296.447	265.148	-0.02	-0.140977	-0.160977	0.018434
YFR051C	RET2	0.13	0.14	73.8	76.7	80.7589	84.5161	0.01	0.0556058	0.0656058	0.090054
YFR052W	RPN12	0.04	0.08	253.1	248.9	260.216	263.092	0.04	-0.0241413	0.0158587	0.038713
YFR053C	HXK1	0.32	0.22	30.3	9.5	37.8244	11.065	-0.1	-1.67332	-1.77332	-0.666264
YGL001C	ERG26	-0.05	-0.03	386.6	417.1	373.431	408.516	0.02	0.109552	0.129552	0.038369
YGL004C	RPN14	0.02	0.21	49.2	40.8	49.8868	47.1929	0.19	-0.270089	-0.0800892	-0.019603
YGL005C	COG7	-0.06	0.08	90.1	86.3	86.4297	91.2207	0.14	-0.0621665	0.0778335	-0.724788
YGL006W	PMC1	0.2	0.24	41.8	35.3	48.0156	41.689	0.04	-0.243835	-0.203835	-0.067421
YGL008C	PMA1	0.15	0.01	1157.9	1044.1	1284.77	1051.36	-0.14	-0.149251	-0.289251	-0.045586
YGL009C	LEU1	0.1	0.02	2394.6	3519.2	2566.47	3568.33	-0.08	0.555463	0.475463	0.492837
YGL011C	SCL1	0.19	0.43	230	203	262.376	273.488	0.24	-0.180154	0.0598459	0.04728
YGL012W	ERG4	-0.05	-0.25	273.9	272	264.57	228.724	-0.2	-0.0100426	-0.210043	-0.057493
YGL013C	PDR1	0.21	0.31	16.9	17.1	19.548	21.199	0.1	0.0169731	0.116973	0.182792
YGL014W	PUF4	0.19	0.19	40.6	45.5	46.315	51.9047	0	0.164387	0.164387	-0.020367
YGL016W	KAP122	0.03	0.03	28.2	32.9	28.7925	33.5913	0	0.222392	0.222392	0.246821
YGL017W	ATE1	-0.05	0.01	38.9	45.6	37.5749	45.9172	0.06	0.229264	0.289264	0.220491
YGL018C	JAC1	0.01	0.05	21.5	25.2	21.6495	26.0887	0.04	0.229087	0.269087	0.279745
YGL019W	CKB1	-0.31	-0.32	186.5	178.6	150.439	143.071	-0.01	-0.0624436	-0.0724436	0.076188
YGL020C	GET1	-0.09	-0.01	155.6	158.4	146.19	157.306	0.08	0.0257303	0.10573	0.207806
YGL021W	ALK1	0.02	0.03	63.6	86.9	64.4878	88.726	0.01	0.450329	0.460329	0.239583
YGL022W	STT3	-0.02	-0.15	111.3	108.5	109.768	97.7857	-0.13	-0.0367586	-0.166759	-0.087071
YGL023C	PIB2	-0.08	-0.11	34.1	40.1	32.2606	37.1562	-0.03	0.23383	0.20383	0.138176
YGL025C	PGD1	0.2	-0.2	26.9	30.1	30.9	26.2036	-0.4	0.162157	-0.237843	-0.11937
YGL026C	TRP5	0.13	-0.05	281.9	385	308.481	371.885	-0.18	0.449675	0.269675	0.286012
YGL027C	CWH41	0.34	0.48	84	85.2	106.324	118.832	0.14	0.0204641	0.160464	0.358177
YGL028C	SCW11	0.18	0	46.5	47.5	52.6791	47.5	-0.18	0.0306968	-0.149303	-0.130826
YGL030W	RPL30	0.04	-0.04	5895.9	4862.5	6061.66	4729.53	-0.08	-0.278014	-0.358014	-0.221856
YGL031C	RPL24A	-0.36	-0.25	5609.4	4224.6	4370.65	3552.45	0.11	-0.409032	-0.299032	-0.258673
YGL035C	MIG1	0.21	0.08	42.6	37.7	49.2749	39.8496	-0.13	-0.176289	-0.306289	0.037746
YGL036W	YGL036W	0.27	0.13	17.3	15.7	20.8605	17.1804	-0.14	-0.140007	-0.280007	-0.164443
YGL037C	PNC1	-0.15	-0.11	381.8	196.2	344.097	181.797	0.04	-0.960492	-0.920492	-1.06377
YGL038C	OCH1	-0.14	-0.16	52.5	51.3	47.6448	45.9148	-0.02	-0.0333586	-0.0533586	0.119303
YGL039W	YGL039W	0.01	0.31	56.4	67.7	56.7923	83.9282	0.3	0.263461	0.563461	0.263001
YGL040C	HEM2	-0.15	-0.28	224.9	218.9	202.691	180.284	-0.13	-0.0390117	-0.169012	0.003282
YGL041W-A	YGL041W-A	-0.37	-0.23	102.1	96.1	79.0032	81.9382	0.14	-0.0873745	0.0526255	0.169491
YGL043W	DST1	0.14	0.23	141.6	162.7	156.03	190.82	0.09	0.200393	0.290393	0.318761
YGL044C	RNA15	-0.16	-0.04	85.1	93	76.1666	90.4569	0.12	0.128072	0.248072	0.260572
YGL047W	ALG13	-0.23	-0.3	67.6	44.8	57.6381	36.3889	-0.07	-0.593525	-0.663525	-0.215171
YGL048C	RPT6	-0.14	-0.04	391.3	350.9	355.112	341.305	0.1	-0.157215	-0.0572152	-0.004582
YGL049C	TIF4632	0.26	0.41	37.4	34.9	44.7857	46.3711	0.15	-0.0998112	0.0501888	-0.085579
YGL050W	TYW3	0.24	0.35	65.9	59	77.8274	75.1991	0.11	-0.159564	-0.0495635	-0.103695
YGL053W	PRM8	0.1	-0.03	28.9	25.6	30.9743	25.0732	-0.13	-0.174926	-0.304926	0.134342
YGL055W	OLE1	0.13	-0.07	366.2	365.2	400.73	347.903	-0.2	-0.00394503	-0.203945	-0.348547
YGL056C	SDS23	0.12	-0.02	39.8	43.2	43.252	42.6053	-0.14	0.118263	-0.0217371	0.274451
YGL057C	GEP7	0.17	-0.08	21.4	23.1	24.0763	21.8539	-0.25	0.110282	-0.139718	0.444896
YGL059W	PKP2	0.05	0.11	58.8	88.7	60.8736	95.7275	0.06	0.593118	0.653118	-0.144332
YGL060W	YBP2	0.15	0.02	20.6	22.6	22.8571	22.9155	-0.13	0.133678	0.00367844	0.043511
YGL061C	DUO1	0	-0.03	50	59.3	50	58.0796	-0.03	0.246104	0.216104	1.09171
YGL062W	PYC1	0.16	0.17	105	71.7	117.315	80.6667	0.01	-0.550344	-0.540344	0.16321
YGL064C	MRH4	0.03	-0.05	18.5	20.6	18.8887	19.8983	-0.08	0.155119	0.0751191	0.178868
YGL065C	ALG2	0.2	0.36	31.3	34.9	35.9543	44.7916	0.16	0.157064	0.317064	0.179663
YGL066W	SGF73	0.23	0.19	25.5	34	29.9073	38.786	-0.04	0.415037	0.375037	0.234188
YGL067W	NPY1	0.19	0.41	62.7	63.3	71.5259	84.1058	0.22	0.0137401	0.23374	0.053739
YGL068W	MNP1	-0.19	-0.2	364.3	387.4	319.347	337.251	-0.01	0.088697	0.078697	0.352608
YGL071W	AFT1	0.37	0.37	32.6	31.2	42.1307	40.3214	0	-0.0633259	-0.0633259	-0.092581
YGL073W	HSF1	0.03	0.07	29.6	33.6	30.222	35.2705	0.04	0.182864	0.222864	-0.185953
YGL076C	RPL7A	0.02	-0.04	1228.2	974.9	1245.35	948.241	-0.06	-0.333219	-0.393219	-0.270522
YGL077C	HNM1	-0.08	-0.12	248.7	278.2	235.285	255.996	-0.04	0.161716	0.121716	0.206481
YGL078C	DBP3	-0.01	0.1	198.9	178.3	197.526	191.097	0.11	-0.157737	-0.0477366	-0.073563
YGL082W	YGL082W	-0.07	0.01	124.4	110.6	118.508	111.369	0.08	-0.169635	-0.0896351	0.040489
YGL083W	SCY1	0.06	0.47	11	9.7	11.4671	13.4356	0.41	-0.181447	0.228553	-0.025608
YGL086W	MAD1	0.09	0.34	51.9	50.8	55.2408	64.3004	0.25	-0.030906	0.219094	-0.007954
YGL087C	MMS2	0.1	0.03	89.1	87.2	95.495	89.0323	-0.07	-0.0310973	-0.101097	-0.153653
YGL091C	NBP35	-0.14	-0.05	102.7	119.6	93.2022	115.526	0.09	0.219781	0.309781	0.207386
YGL092W	NUP145	0.2	0.31	44	45.9	50.5427	56.9026	0.11	0.0609906	0.170991	0.10573
YGL093W	SPC105	0.21	0.27	29.6	32	34.238	38.5859	0.06	0.112475	0.172475	-0.32458
YGL094C	PAN2	-0.01	0.13	20.6	20.7	20.4577	22.6519	0.14	0.00698643	0.146986	-0.139272
YGL095C	VPS45	0.12	0.32	68.8	72.6	74.7674	90.6288	0.2	0.077561	0.277561	0.089775
YGL097W	SRM1	-0.05	-0.1	137.5	132.4	132.816	123.534	-0.05	-0.0545285	-0.104528	0.063121
YGL098W	USE1	0.14	0.14	64.3	59.3	70.8525	65.343	0	-0.116787	-0.116787	-0.159369
YGL099W	LSG1	0.11	0.18	49.2	61.6	53.098	69.7856	0.07	0.324272	0.394272	-0.018037
YGL100W	SEH1	0.04	0.13	130.2	144.8	133.86	158.454	0.09	0.153332	0.243332	0.299958
YGL101W	YGL101W	-0.08	0.05	200	193.5	189.212	200.324	0.13	-0.0476664	0.0823336	0.101204
YGL103W	RPL28	-0.16	-0.34	9157.9	7776.3	8196.55	6143.6	-0.18	-0.235933	-0.415933	-0.302177
YGL105W	ARC1	0.02	0.01	405.9	393.5	411.566	396.237	-0.01	-0.0447607	-0.0547607	0.065581
YGL106W	MLC1	-0.09	-0.07	450.2	438.2	422.973	417.446	0.02	-0.0389766	-0.0189766	-0.002513
YGL107C	RMD9	0.19	0.35	44.7	43.7	50.9921	55.6983	0.16	-0.0326416	0.127358	0.087733
YGL108C	YGL108C	-0.27	-0.11	84.9	82.1	70.4092	76.0729	0.16	-0.0483823	0.111618	-0.113115
YGL110C	CUE3	0.06	0.27	42	42.4	43.7836	51.1263	0.21	0.0136749	0.223675	-0.080014
YGL111W	NSA1	0.04	0.27	85.5	91.4	87.9037	110.211	0.23	0.0962697	0.32627	0.092389
YGL112C	TAF6	0.21	0.34	66.4	75.3	76.8041	95.3115	0.13	0.181467	0.311467	0.12343
YGL113W	SLD3	-0.04	-0.02	15	16.2	14.5898	15.977	0.02	0.111031	0.131031	-1.25283
YGL115W	SNF4	-0.02	-0.01	244.2	249.5	240.838	247.777	0.01	0.0309766	0.0409766	0.181146
YGL117W	YGL117W	0.02	0.02	579.3	787.7	587.387	798.696	0	0.443336	0.443336	0.535741
YGL119W	COQ8	-0.04	0.16	62.2	59	60.4991	65.9199	0.2	-0.0761996	0.1238	-0.022227
YGL120C	PRP43	0.06	0.09	83.6	78.6	87.1501	83.6595	0.03	-0.0889736	-0.0589736	0.047557
YGL122C	NAB2	0.05	0.17	70.5	61.4	72.9862	69.0786	0.12	-0.199385	-0.0793846	-0.009279
YGL123W	RPS2	-0.19	-0.28	6744.2	4976	5912	4098.19	-0.09	-0.438661	-0.528661	-0.279228
YGL124C	MON1	0.07	0.11	33.3	31.9	34.9556	34.4274	0.04	-0.0619658	-0.0219658	-0.358235
YGL125W	MET13	0.28	-0.03	54.7	86.3	66.4165	84.524	-0.31	0.65782	0.34782	0.573714
YGL129C	RSM23	0	-0.01	71.3	67.9	71.3	67.431	-0.01	-0.0704905	-0.0804905	0.036711
YGL130W	CEG1	-0.08	0.08	76.3	77.5	72.1842	81.9189	0.16	0.0225133	0.182513	0.145812
YGL133W	ITC1	0.36	0.41	16.2	15.8	20.7915	20.9932	0.05	-0.0360693	0.0139307	0.08231
YGL135W	RPL1B	-0.28	-0.4	1573.1	1222.3	1295.59	926.33	-0.12	-0.364012	-0.484012	-0.266807
YGL137W	SEC27	0.19	0.21	154.8	150.8	176.59	174.429	0.02	-0.037769	-0.017769	0.054096
YGL139W	FLC3	0.21	-0.01	26.6	26.6	30.7679	26.4163	-0.22	0	-0.22	0.139118
YGL140C	YGL140C	0.18	0.41	35.6	44.6	40.3307	59.2594	0.23	0.325166	0.555166	0.351751
YGL141W	HUL5	0.03	0.17	30.2	36.2	30.8346	40.7271	0.14	0.261441	0.401441	0.110855
YGL145W	TIP20	0.29	0.32	42.5	42.1	51.9622	52.5547	0.03	-0.0136426	0.0163574	0.001877
YGL147C	RPL9A	-0.07	-0.15	4597.2	3463.9	4379.47	3121.84	-0.08	-0.408358	-0.488358	-0.402565
YGL148W	ARO2	-0.08	-0.2	645.3	681.6	610.491	593.367	-0.12	0.0789553	-0.0410447	0.23762
YGL150C	INO80	0.21	0.32	25	23	28.9172	28.7116	0.11	-0.120294	-0.0102942	-0.033559
YGL151W	NUT1	0.19	0.1	25.1	28.2	28.6332	30.224	-0.09	0.168008	0.0780078	0.131796
YGL153W	PEX14	-0.13	0	73	72.8	66.7097	72.8	0.13	-0.00395801	0.126042	0.3105
YGL155W	CDC43	0.07	0.33	62.1	65.5	65.1874	82.3344	0.26	0.0769016	0.336902	0.547653
YGL156W	AMS1	-0.02	0.15	12.3	13.1	12.1307	14.5354	0.17	0.0909085	0.260908	-0.57669
YGL157W	ARI1	0.09	0.18	112.5	109.4	119.742	123.937	0.09	-0.0403123	0.0496877	-0.07675
YGL159W	YGL159W	0.02	0.06	71.7	81.6	72.7009	85.0652	0.04	0.186596	0.226596	0.199482
YGL160W	AIM14	-0.02	0.11	51.1	57.4	50.3965	61.9477	0.13	0.167727	0.297727	0.072118
YGL161C	YIP5	-0.14	-0.09	205.6	253.8	186.586	238.451	0.05	0.303852	0.353852	-0.070431
YGL164C	YRB30	0.24	0.39	33.1	34.1	39.0909	44.6844	0.15	0.0429405	0.192941	0.205796
YGL167C	PMR1	0.04	0.03	63.7	63.4	65.4909	64.7322	-0.01	-0.00681053	-0.0168105	-0.049219
YGL169W	SUA5	-0.15	0.08	43.5	49.5	39.2044	52.3224	0.23	0.186413	0.416413	0.333857
YGL171W	ROK1	0.11	0.3	68	67.9	73.3875	83.5947	0.19	-0.00212317	0.187877	-0.11107
YGL172W	NUP49	0.07	0.04	131.3	132.2	137.828	135.917	-0.03	0.00985526	-0.0201447	0.083948
YGL173C	KEM1	0.17	0.14	49.5	47.3	55.6904	52.1201	-0.03	-0.0655883	-0.0955883	-0.124662
YGL178W	MPT5	0.22	-0.21	8.3	10.8	9.66729	9.337	-0.43	0.379848	-0.0501519	0.075072
YGL180W	ATG1	0.3	0.19	5.3	10.6	6.52507	12.0921	-0.11	1	0.89	0.475673
YGL181W	GTS1	0.17	0.23	75.6	72.7	85.0544	85.2651	0.06	-0.0564309	0.00356913	0.195239
YGL184C	STR3	0.23	0.44	21.2	55.9	24.8641	75.8342	0.21	1.39878	1.60878	1.0555
YGL185C	YGL185C	-0.08	-0.01	40	35.4	37.8423	35.1555	0.07	-0.176251	-0.106251	-0.372759
YGL187C	COX4	-0.13	-0.05	569.4	442.7	520.336	427.62	0.08	-0.363113	-0.283113	-0.287959
YGL189C	RPS26A	0.22	0.18	3067.7	2413.1	3573.05	2733.76	-0.04	-0.34627	-0.38627	-0.687954
YGL190C	CDC55	0.14	0.32	65	53.9	71.6238	67.285	0.18	-0.270154	-0.0901544	-0.300314
YGL191W	COX13	0	-0.02	611.3	604.3	611.3	595.98	-0.02	-0.0166156	-0.0366156	-0.391821
YGL194C	HOS2	-0.1	0.2	21.6	20.4	20.1535	23.4334	0.3	-0.0824622	0.217538	0.163185
YGL195W	GCN1	0.04	-0.01	48.2	51	49.5551	50.6477	-0.05	0.0814641	0.0314641	-0.025873
YGL196W	DSD1	-0.05	-0.09	68.7	83.3	66.3598	78.2622	-0.04	0.278006	0.238006	0.413296
YGL197W	MDS3	0.07	0.05	12	13.6	12.5966	14.0796	-0.02	0.180572	0.160572	0.041829
YGL200C	EMP24	-0.14	-0.27	392.4	338	356.111	280.31	-0.13	-0.215302	-0.345302	-0.200885
YGL201C	MCM6	0.08	0.18	31.2	34.1	32.979	38.6313	0.1	0.128226	0.228226	0.037867
YGL202W	ARO8	0	0	343.9	563.8	343.9	563.8	0	0.713194	0.713194	0.494947
YGL203C	KEX1	0.14	0.27	48.3	53	53.222	63.9078	0.13	0.133969	0.263969	-0.135655
YGL206C	CHC1	0.12	0.01	63.1	62.7	68.573	63.1361	-0.11	-0.00917456	-0.119175	-0.027393
YGL207W	SPT16	0.19	0.18	88	84.2	100.387	95.3888	-0.01	-0.0636833	-0.0736833	-0.0749
YGL208W	SIP2	-0.07	-0.26	20.7	19.8	19.7196	16.5347	-0.19	-0.0641303	-0.25413	0.386158
YGL210W	YPT32	0.09	0.14	90.9	103	96.7512	113.496	0.05	0.180292	0.230292	-0.094981
YGL211W	NCS6	0.01	-0.08	91.5	106.8	92.1364	101.039	-0.09	0.223068	0.133068	-0.013102
YGL212W	VAM7	0.15	-0.06	27.6	25.3	30.6241	24.2694	-0.21	-0.125531	-0.335531	0.055355
YGL213C	SKI8	0	0.07	86.9	84.9	86.9	89.1209	0.07	-0.0335916	0.0364084	0.09818
YGL216W	KIP3	0.1	0.3	15.4	17.5	16.5053	21.545	0.2	0.184425	0.384425	0.081016
YGL220W	FRA2	-0.18	-0.22	290.1	301	256.072	258.428	-0.04	0.0532132	0.0132132	0.082327
YGL221C	NIF3	-0.11	-0.16	239.9	254.2	222.288	227.515	-0.05	0.0835309	0.0335309	0.275784
YGL222C	EDC1	-0.02	0.23	29.8	24.7	29.3897	28.969	0.25	-0.270801	-0.0208013	-0.337382
YGL223C	COG1	0.08	-0.13	38.4	43.4	40.5895	39.6603	-0.21	0.176589	-0.0334113	0.074892
YGL224C	SDT1	0.11	0.09	196.8	323.9	212.392	344.75	-0.02	0.718818	0.698818	0.703284
YGL226W	MTC3	-0.15	0.2	49.1	56.6	44.2514	65.0163	0.35	0.205079	0.555079	0.170771
YGL227W	VID30	0.12	0.07	17.3	14.7	18.8005	15.4308	-0.05	-0.234956	-0.284956	-0.065641
YGL228W	SHE10	0.11	0.09	97.6	117	105.333	124.531	-0.02	0.261555	0.241555	-0.07828
YGL231C	EMC4	0.04	-0.17	274.5	248.2	282.217	220.611	-0.21	-0.145303	-0.355303	0.022029
YGL232W	TAN1	-0.04	0.17	122.9	112.6	119.539	126.682	0.21	-0.126278	0.0837219	-0.102505
YGL233W	SEC15	0.11	0.43	41.6	37.4	44.8959	50.3865	0.32	-0.153545	0.166455	0.117565
YGL234W	ADE5,7	0.07	-0.06	206.1	299.7	216.347	287.491	-0.13	0.540175	0.410175	0.215193
YGL236C	MTO1	0.04	0.01	18.4	21.4	18.9173	21.5488	-0.03	0.217905	0.187905	0.046194
YGL237C	HAP2	0.02	0.32	22.7	22.3	23.0169	27.8378	0.3	-0.0256486	0.274351	0.028566
YGL238W	CSE1	0.27	0.3	72	78	86.8182	96.0293	0.03	0.115477	0.145477	-0.080713
YGL241W	KAP114	-0.04	-0.01	32	34.3	31.125	34.0631	0.03	0.100137	0.130137	0.292918
YGL242C	YGL242C	-0.22	0.03	162	171.3	139.088	174.899	0.25	0.0805313	0.330531	0.004638
YGL243W	TAD1	-0.08	0.02	59.3	62.7	56.1012	63.5753	0.1	0.0804333	0.180433	-0.099912
YGL244W	RTF1	-0.02	0.14	133.5	122.3	131.662	134.763	0.16	-0.126415	0.0335847	-0.027464
YGL245W	GUS1	0.11	0.11	293.8	311.2	317.077	335.856	0	0.0830077	0.0830077	0.044285
YGL246C	RAI1	-0.02	-0.03	103.7	111.8	102.272	109.499	-0.01	0.108504	0.0985043	0.087067
YGL248W	PDE1	0.02	0.25	64.9	65.5	65.806	77.8931	0.23	0.0132764	0.243276	1.17287
YGL252C	RTG2	-0.02	0.16	87.6	98.8	86.394	110.388	0.18	0.17358	0.35358	0.40084
YGL253W	HXK2	-0.05	-0.13	1167.7	715.4	1127.92	653.755	-0.08	-0.706848	-0.786848	-0.393644
YGL254W	FZF1	0.04	-0.26	15.6	25.6	16.0386	21.3783	-0.3	0.714598	0.414598	0.35623
YGL255W	ZRT1	-0.12	-0.29	1655	1307.3	1522.91	1069.24	-0.17	-0.340241	-0.510241	-0.387447
YGL256W	ADH4	0.19	0.15	521.3	317.3	594.68	352.066	-0.04	-0.716266	-0.756266	-1.0085
YGL257C	MNT2	-0.05	0.18	107.4	102.6	103.742	116.234	0.23	-0.0659633	0.164037	-0.183666
YGR001C	YGR001C	0.13	0.11	125.4	182.8	137.224	197.283	-0.02	0.543729	0.523729	-0.124464
YGR002C	SWC4	-0.08	0	45.8	51.7	43.3294	51.7	0.08	0.174817	0.254817	-0.11841
YGR003W	CUL3	0.16	0.2	22.4	31.7	25.0272	36.4137	0.04	0.500984	0.540984	0.332698
YGR004W	PEX31	0.1	0.12	31.7	30.2	33.9752	32.8194	0.02	-0.0699343	-0.0499343	0.441775
YGR005C	TFG2	-0.03	0.06	116.9	109.5	114.494	114.15	0.09	-0.0943441	-0.00434406	0.120396
YGR007W	ECT1	0.02	0.16	107.5	110.6	109.001	123.572	0.14	0.0410147	0.181015	0.047895
YGR008C	STF2	-0.05	-0.2	160	108.5	154.55	94.4547	-0.15	-0.560377	-0.710377	-0.187856
YGR009C	SEC9	0.12	0.32	61.8	58.4	67.1602	72.9025	0.2	-0.0816385	0.118362	0.119538
YGR012W	YGR012W	0.13	0.14	58.9	65.6	64.4539	72.285	0.01	0.155428	0.165428	0.101033
YGR013W	SNU71	0.02	0.22	31.5	36.3	31.9397	42.2798	0.2	0.204618	0.404618	0.104854
YGR017W	YGR017W	-0.05	-0.12	112.7	132.3	108.861	121.741	-0.07	0.231326	0.161326	0.167616
YGR019W	UGA1	0.18	0.2	65.4	77.9	74.0906	89.4836	0.02	0.252333	0.272333	-0.302221
YGR020C	VMA7	0.02	0.11	803.3	794.5	814.514	857.447	0.09	-0.0158917	0.0741083	0.217189
YGR021W	YGR021W	0.04	-0.19	61.8	61.6	63.5374	53.9989	-0.23	-0.00467649	-0.234676	-3.59924
YGR024C	THG1	0.03	0.24	196.5	193.9	200.629	228.994	0.21	-0.0192165	0.190783	-0.023954
YGR027C	RPS25A	0.01	-0.07	6752.3	5798.1	6799.27	5523.49	-0.08	-0.219799	-0.299799	-0.266682
YGR028W	MSP1	0.1	0.05	107.7	108.2	115.43	112.016	-0.05	0.00668225	-0.0433178	-0.073607
YGR029W	ERV1	-0.12	-0.08	162.5	187.8	149.53	177.67	0.04	0.208757	0.248757	0.32406
YGR030C	POP6	0.29	0.26	36.2	44.6	44.2596	53.4076	-0.03	0.301054	0.271054	-0.014148
YGR031W	YGR031W	-0.1	-0.16	69.3	72.2	64.6592	64.6208	-0.06	0.0591435	-0.000856515	0.003344
YGR032W	GSC2	0.08	-0.04	11.9	21.2	12.5785	20.6203	-0.12	0.833103	0.713103	0.157684
YGR033C	TIM21	-0.07	-0.01	165.4	139.2	157.566	138.238	0.06	-0.2488	-0.1888	-0.344238
YGR034W	RPL26B	-0.24	-0.31	5694.5	4373.1	4821.79	3527.53	-0.07	-0.380913	-0.450913	-0.272426
YGR037C	ACB1	-0.2	-0.07	694.6	542.7	604.684	516.997	0.13	-0.356028	-0.226028	-0.103585
YGR040W	KSS1	0.18	0.14	44.8	47.8	50.7532	52.6711	-0.04	0.0935119	0.0535119	0.178566
YGR042W	YGR042W	-0.19	0.01	62	51.7	54.3496	52.0596	0.2	-0.262104	-0.0621039	-0.457976
YGR043C	NQM1	-0.28	-0.08	9.8	16.7	8.07119	15.7992	0.2	0.768994	0.968994	-2.16915
YGR044C	RME1	-0.03	-0.1	112.2	110.7	109.891	103.287	-0.07	-0.0194175	-0.0894175	-0.274636
YGR047C	TFC4	0.04	0.12	27.7	26.5	28.4788	28.7985	0.08	-0.0638936	0.0161064	-0.283951
YGR048W	UFD1	0.03	-0.19	91.1	89.8	93.0142	78.7192	-0.22	-0.0207356	-0.240736	-0.229592
YGR049W	SCM4	0.14	0.17	69.5	79	76.5824	88.8796	0.03	0.18484	0.21484	-0.394838
YGR054W	YGR054W	0.14	0.19	53.3	57.2	58.7315	65.2517	0.05	0.10188	0.15188	0.032333
YGR055W	MUP1	0.16	0.17	166.6	210.9	186.14	237.275	0.01	0.340171	0.350171	-0.226142
YGR056W	RSC1	0.21	0.22	13.6	14.9	15.731	17.3545	0.01	0.131706	0.141706	-0.177312
YGR061C	ADE6	0.17	0.16	160	203.4	180.009	227.256	-0.01	0.346248	0.336248	-0.003824
YGR063C	SPT4	-0.28	-0.3	229.4	219.8	188.932	178.533	-0.02	-0.061674	-0.081674	-0.037824
YGR065C	VHT1	0.06	0.1	166.8	192.9	173.883	206.745	0.04	0.209734	0.249734	-0.373678
YGR068C	ART5	0.37	-0.04	6.1	8.2	7.88335	7.97577	-0.41	0.426815	0.0168147	-0.123835
YGR072W	UPF3	0.03	0.19	55.7	58	56.8704	66.1643	0.16	0.0583756	0.218376	0.143192
YGR074W	SMD1	-0.14	-0.19	178.6	196.3	162.083	172.078	-0.05	0.136328	0.0863281	0.240403
YGR076C	MRPL25	0.05	0.03	69.7	75.2	72.158	76.7801	-0.02	0.109574	0.089574	0.03255
YGR078C	PAC10	-0.07	0.02	64	64.5	60.9688	65.4004	0.09	0.0112273	0.101227	0.097385
YGR080W	TWF1	0.03	0.05	70.4	81.8	71.8793	84.6847	0.02	0.216525	0.236525	0.341717
YGR081C	SLX9	-0.01	0.04	147.4	172.7	146.382	177.555	0.05	0.228532	0.278532	-0.21002
YGR082W	TOM20	-0.03	0.11	160.2	145.8	156.903	157.351	0.14	-0.135883	0.00411657	-0.034119
YGR083C	GCD2	0.11	0.29	77.5	75.3	83.6402	92.0648	0.18	-0.0415464	0.138454	0.015356
YGR084C	MRP13	-0.08	-0.15	97.3	95.7	92.0514	86.2497	-0.07	-0.0239209	-0.0939209	-0.03596
YGR085C	RPL11B	-0.16	-0.22	700.3	580.3	626.786	498.226	-0.06	-0.271174	-0.331174	-0.28339
YGR086C	PIL1	0.11	0.08	491.6	338.6	530.549	357.906	-0.03	-0.537903	-0.567903	-0.257359
YGR088W	CTT1	-0.09	-0.27	9	8.2	8.4557	6.80042	-0.18	-0.134301	-0.314301	-1.78837
YGR089W	NNF2	0.21	0.36	24.8	26	28.6859	33.3691	0.15	0.0681715	0.218172	0.040653
YGR090W	UTP22	0.18	0.09	57.8	52.6	65.4807	55.9859	-0.09	-0.136007	-0.226007	-0.201577
YGR091W	PRP31	0.08	0	30.3	29.8	32.0276	29.8	-0.08	-0.0240055	-0.104005	0.231911
YGR092W	DBF2	0.14	0.22	53.4	61.3	58.8417	71.3982	0.08	0.199047	0.279047	0.020264
YGR093W	YGR093W	0.05	0.08	53.2	57.6	55.0761	60.8842	0.03	0.114643	0.144643	0.13474
YGR094W	VAS1	0.04	-0.04	353.5	373.4	363.438	363.189	-0.08	0.0790117	-0.000988287	-0.003804
YGR095C	RRP46	-0.13	-0.12	90.9	105.2	83.0673	96.8037	0.01	0.210783	0.220783	0.214947
YGR097W	ASK10	0.28	0.16	18.8	22.2	22.8269	24.8038	-0.12	0.239827	0.119827	0.005011
YGR099W	TEL2	0.01	-0.02	38	40.8	38.2643	40.2383	-0.03	0.10257	0.0725697	0.190432
YGR100W	MDR1	0.14	0.31	42.8	42.8	47.1615	53.0595	0.17	0	0.17	0.094293
YGR102C	YGR102C	0.24	0.05	42.5	49.5	50.1922	51.2456	-0.19	0.219966	0.0299657	0.319138
YGR103W	NOP7	-0.07	0.12	335.6	327.2	319.705	355.58	0.19	-0.03657	0.15343	0.008207
YGR104C	SRB5	0.23	0.29	45.4	50.8	53.2467	62.1101	0.06	0.162136	0.222136	-0.038271
YGR106C	VOA1	-0.05	0.08	650.1	609.9	627.955	644.675	0.13	-0.0920889	0.0379111	0.022377
YGR111W	YGR111W	-0.03	0.08	67.1	61.4	65.7191	64.9009	0.11	-0.128074	-0.0180741	-0.07853
YGR116W	SPT6	0.25	0.22	63.6	61.6	75.6336	71.7476	-0.03	-0.0460964	-0.0760964	0.098819
YGR117C	YGR117C	0.13	0.03	50	44	54.7147	44.9245	-0.1	-0.184425	-0.284425	-0.2506
YGR118W	RPS23A	-0.4	-0.36	3972.7	2919.1	3010.74	2274.46	0.04	-0.444596	-0.404596	-0.26631
YGR119C	NUP57	0.02	0.06	145.9	152.2	147.937	158.663	0.04	0.0609885	0.100988	0.052005
YGR120C	COG2	0.03	0.11	61.6	58.4	62.8943	63.0269	0.08	-0.076962	0.00303802	-0.02546
YGR122W	YGR122W	0.21	0.24	27.2	27.8	31.4619	32.8316	0.03	0.0314782	0.0614782	0.157076
YGR123C	PPT1	0.3	0.35	71.3	69.2	87.7806	88.1996	0.05	-0.04313	0.00686996	0.020754
YGR124W	ASN2	-0.16	-0.2	542.8	575.1	485.82	500.654	-0.04	0.0833921	0.0433921	0.23408
YGR125W	YGR125W	0.21	0.45	34.8	45.6	40.2527	62.2914	0.24	0.389947	0.629947	0.28395
YGR126W	YGR126W	-0.08	-0.03	6.6	9.3	6.24398	9.10861	0.05	0.494765	0.544765	-0.78467
YGR128C	UTP8	0.22	0.29	80.6	83.8	93.8775	102.457	0.07	0.0561704	0.12617	0.028591
YGR129W	SYF2	0.08	0.12	47.4	55.3	50.1027	60.0964	0.04	0.222392	0.262392	0.167973
YGR130C	YGR130C	0.11	0.07	47.8	44.1	51.5871	46.2925	-0.04	-0.116232	-0.156232	-0.08828
YGR132C	PHB1	0	-0.03	302	280.1	302	274.336	-0.03	-0.108607	-0.138607	0.066276
YGR134W	CAF130	0.06	0.22	17.3	20.1	18.0347	23.4111	0.16	0.216423	0.376423	0.118225
YGR135W	PRE9	-0.03	0.05	520.2	501.3	509.494	518.978	0.08	-0.0533922	0.0266078	0.089499
YGR136W	LSB1	0.16	0.25	159.3	126.3	177.984	150.197	0.09	-0.334892	-0.244892	-0.208766
YGR138C	TPO2	-0.04	-0.01	11.7	8.1	11.3801	8.04405	0.03	-0.530515	-0.500515	-0.782022
YGR140W	CBF2	0.13	0.27	15.8	17.6	17.2898	21.2222	0.14	0.155651	0.295651	-0.070477
YGR141W	VPS62	-0.05	0.08	51.9	63.7	50.1321	67.332	0.13	0.295559	0.425559	0.145564
YGR143W	SKN1	0.13	0.16	27.2	26.4	29.7648	29.4964	0.03	-0.0430687	-0.0130687	0.004866
YGR145W	ENP2	0.18	0.34	60.3	59.9	68.3129	75.8188	0.16	-0.009602	0.150398	0.016673
YGR147C	NAT2	-0.11	-0.16	173.3	195.9	160.578	175.335	-0.05	0.176846	0.126846	0.236415
YGR148C	RPL24B	-0.4	-0.18	3513.7	2297.6	2662.89	2028.1	0.22	-0.612863	-0.392863	-0.302992
YGR149W	YGR149W	0.08	0.01	46.4	34	49.0456	34.2365	-0.07	-0.44859	-0.51859	-0.352291
YGR150C	CCM1	0.27	0.27	28.7	28	34.6067	33.7626	0	-0.0356239	-0.0356239	-0.170714
YGR152C	RSR1	-0.22	0.07	143	126.5	122.775	132.789	0.29	-0.176878	0.113122	-0.049977
YGR155W	CYS4	0.12	0.04	537.1	586.4	583.685	602.886	-0.08	0.126694	0.0466944	0.017495
YGR156W	PTI1	0.03	0.28	14	14.5	14.2942	17.6058	0.25	0.0506261	0.300626	-0.046884
YGR157W	CHO2	0.28	0.46	272.3	231.3	330.625	318.163	0.18	-0.235432	-0.0554317	0.042044
YGR158C	MTR3	-0.05	-0.04	85.5	92.2	82.5876	89.6788	0.01	0.108842	0.118842	0.137529
YGR159C	NSR1	0.05	-0.07	371.7	363.5	384.808	346.284	-0.12	-0.0321833	-0.152183	-0.172684
YGR161C	RTS3	0.11	-0.01	97.9	115.7	105.656	114.901	-0.12	0.241008	0.121008	1.06148
YGR162W	TIF4631	0.2	0.21	178.5	157.6	205.043	182.294	0.01	-0.179657	-0.169657	-0.145129
YGR163W	GTR2	0.16	0.39	75.9	93.5	84.8021	122.522	0.23	0.300866	0.530866	0.093638
YGR165W	MRPS35	-0.05	-0.06	132	124	127.504	118.949	-0.01	-0.0901978	-0.100198	-0.032595
YGR166W	KRE11	0.41	0.26	22.7	24.4	30.1612	29.2185	-0.15	0.104189	-0.0458111	-0.175295
YGR167W	CLC1	-0.05	0.12	202.9	189.1	195.988	205.502	0.17	-0.10162	0.0683805	-0.047654
YGR169C	PUS6	0.09	0.08	26.5	20.9	28.2058	22.0917	-0.01	-0.342489	-0.352489	-0.259887
YGR169C-A	YGR169C-A	-0.13	0.08	187.9	130.5	171.709	137.941	0.21	-0.525915	-0.315915	-0.47154
YGR170W	PSD2	0.2	0.28	26.3	26.7	30.2108	32.419	0.08	0.0217769	0.101777	0.467937
YGR171C	MSM1	0.03	0.16	22.9	22.6	23.3812	25.2507	0.13	-0.0190248	0.110975	1.08645
YGR173W	RBG2	-0.05	0.11	145.8	128.1	140.834	138.249	0.16	-0.18672	-0.0267202	-0.121034
YGR174C	CBP4	-0.21	-0.39	63.3	65	54.7252	49.6034	-0.18	0.0382342	-0.141766	0.385523
YGR175C	ERG1	0.1	0	521.6	611.9	559.037	611.9	-0.1	0.230352	0.130352	0.033227
YGR177C	ATF2	0.1	-0.01	26.9	27.9	28.8307	27.7073	-0.11	0.0526589	-0.0573411	0.034157
YGR178C	PBP1	0.15	0.23	163.3	149.9	181.193	175.808	0.08	-0.123524	-0.0435244	-0.122542
YGR180C	RNR4	0	0.02	564.3	535.5	564.3	542.975	0.02	-0.0755758	-0.0555758	-0.097199
YGR181W	TIM13	0.05	0.1	146	134.8	151.149	144.475	0.05	-0.115148	-0.0651479	-0.040729
YGR184C	UBR1	0.43	0.37	18.5	19.7	24.9238	25.4594	-0.06	0.0906704	0.0306704	0.080933
YGR185C	TYS1	0.15	0.16	279.7	301.6	310.347	336.974	0.01	0.108756	0.118756	0.163752
YGR186W	TFG1	0.11	0.28	72.1	69.1	77.8124	83.9009	0.17	-0.0613135	0.108686	0.093803
YGR187C	HGH1	0.1	0.27	111.1	107.9	119.074	130.107	0.17	-0.042164	0.127836	0.111059
YGR189C	CRH1	0.06	-0.05	246.3	253.9	256.759	245.251	-0.11	0.0438438	-0.0661562	0.010287
YGR191W	HIP1	-0.05	-0.06	70.8	96.4	68.3883	92.4731	-0.01	0.445284	0.435284	-0.61802
YGR192C	TDH3	-0.01	-0.07	13330.6	10696.6	13238.5	10190	-0.06	-0.317589	-0.377589	-0.30434
YGR193C	PDX1	0.25	0.36	88	86.5	104.65	111.016	0.11	-0.0248034	0.0851966	0.299784
YGR194C	XKS1	0.04	0.15	28.4	23.4	29.1984	25.9639	0.11	-0.279382	-0.169382	-0.093555
YGR196C	FYV8	0.08	0.23	35	40.4	36.9956	47.3825	0.15	0.207	0.357	0.140215
YGR198W	YPP1	0.17	0.22	43.8	71.1	49.2776	82.8126	0.05	0.698919	0.748919	-0.032084
YGR199W	PMT6	0.04	-0.02	47.1	49.7	48.4242	49.0158	-0.06	0.0775188	0.0175188	0.454641
YGR200C	ELP2	0.13	0.18	98.8	103.5	108.116	117.253	0.05	0.0670478	0.117048	0.075319
YGR201C	YGR201C	-0.13	-0.3	76.3	64.3	69.7253	52.2278	-0.17	-0.246864	-0.416864	-1.97151
YGR202C	PCT1	-0.06	-0.06	87	96.9	83.456	92.9527	0	0.155481	0.155481	0.45534
YGR204W	ADE3	0.12	0.03	167.4	276.4	181.919	282.208	-0.09	0.723458	0.633458	0.588343
YGR205W	YGR205W	-0.05	-0.03	24.3	20.7	23.4723	20.274	0.02	-0.231326	-0.211326	0.20899
YGR207C	YGR207C	-0.03	0.11	201.7	242.3	197.549	261.497	0.14	0.264583	0.404583	0.363995
YGR208W	SER2	-0.06	-0.07	199.6	259.1	191.469	246.829	-0.01	0.376397	0.366397	-0.042983
YGR209C	TRX2	-0.27	-0.39	579.8	519.5	480.839	396.446	-0.12	-0.158432	-0.278432	-0.719723
YGR210C	YGR210C	0.05	-0.06	109.1	103.8	112.947	99.5716	-0.11	-0.0718447	-0.181845	0.030769
YGR211W	ZPR1	0	0.03	154	154.3	154	157.542	0.03	0.00280771	0.0328077	-0.096396
YGR214W	RPS0A	-0.35	-0.43	2106.3	1570.4	1652.57	1165.65	-0.08	-0.423579	-0.503579	-0.319531
YGR215W	RSM27	-0.36	0.11	151.7	145.4	118.199	156.92	0.47	-0.0611938	0.408806	0.115131
YGR218W	CRM1	0.15	0.26	78.6	82.4	87.2122	98.6722	0.11	0.068115	0.178115	-0.126987
YGR220C	MRPL9	0.1	0.15	124.3	122.2	133.221	135.589	0.05	-0.024582	0.025418	0.088916
YGR222W	PET54	-0.06	0.08	81.5	76.1	78.18	80.4391	0.14	-0.0989036	0.0410964	-0.138719
YGR223C	HSV2	0.21	0.25	38.1	39	44.0698	46.3791	0.04	0.0336831	0.0736831	0.084289
YGR229C	SMI1	-0.04	0	164.1	145.4	159.613	145.4	0.04	-0.174548	-0.134548	-0.171845
YGR231C	PHB2	0.06	0.11	229.8	200.7	239.559	216.601	0.05	-0.195338	-0.145338	0.13263
YGR232W	NAS6	0.29	0.4	93	105.6	113.706	139.34	0.11	0.183307	0.293307	0.002962
YGR233C	PHO81	0.15	0.05	37.9	35	42.0527	36.2343	-0.1	-0.114843	-0.214843	-0.227715
YGR234W	YHB1	0.11	0.14	2556.9	2756.2	2759.48	3037.07	0.03	0.108285	0.138285	-0.059987
YGR235C	YGR235C	-0.12	-0.13	139.6	141.6	128.458	129.399	-0.01	0.0205223	0.0105223	-0.217213
YGR237C	YGR237C	0.35	0.31	18.5	17.6	23.5794	21.8189	-0.04	-0.0719498	-0.11195	0.068659
YGR238C	KEL2	0.18	0.24	18.2	17.8	20.6185	21.0217	0.06	-0.0320612	0.0279388	-0.380601
YGR240C	PFK1	0.18	0.13	281.3	238.4	318.68	260.88	-0.05	-0.238725	-0.288725	-0.192506
YGR244C	LSC2	0.06	0.08	134.3	100.1	140.003	105.808	0.02	-0.424017	-0.404017	-0.198198
YGR245C	SDA1	0.1	0.25	80.5	80.9	86.2778	96.2069	0.15	0.00715092	0.157151	-0.023981
YGR246C	BRF1	-0.06	0.19	44	45.2	42.2076	51.5625	0.25	0.0388192	0.288819	-0.270209
YGR248W	SOL4	0.01	-0.13	7	5.7	7.04869	5.20884	-0.14	-0.296393	-0.436393	-1.2389
YGR250C	YGR250C	0.18	0.07	43.6	38	49.3937	39.8892	-0.11	-0.198329	-0.308329	-0.064485
YGR251W	YGR251W	-0.12	0	71.7	82.2	65.9775	82.2	0.12	0.197165	0.317165	0.150139
YGR252W	GCN5	0.04	0.18	53.4	49	54.9013	55.5113	0.14	-0.124058	0.015942	0.26964
YGR253C	PUP2	-0.13	-0.03	498.5	491.1	455.545	480.993	0.1	-0.0215767	0.0784233	0.052278
YGR254W	ENO1	-0.02	-0.14	643.8	513.6	634.937	466.102	-0.12	-0.325967	-0.445967	-0.892589
YGR255C	COQ6	0.18	0.17	55	56.4	62.3086	63.4533	-0.01	0.0362635	0.0262635	0.086569
YGR256W	GND2	-0.13	0.42	3.9	3.6	3.56394	4.81654	0.55	-0.115477	0.434523	-1.64103
YGR258C	RAD2	0.08	0.39	17.5	16.4	18.4978	21.4905	0.31	-0.0936591	0.216341	0.285892
YGR260W	TNA1	0.15	0.03	166.5	95.5	184.743	97.5067	-0.12	-0.80195	-0.92195	-1.22657
YGR261C	APL6	-0.02	0.03	82.2	90.4	81.0683	92.2995	0.05	0.137184	0.187184	0.211593
YGR262C	BUD32	-0.03	0.06	97.9	110	95.8852	114.671	0.09	0.168123	0.258123	0.226935
YGR263C	SAY1	-0.28	-0.14	29.9	25.7	24.6254	23.3232	0.14	-0.218377	-0.0783771	0.477702
YGR264C	MES1	0.16	0.16	242.9	238.5	271.389	266.473	0	-0.0263732	-0.0263732	-0.031937
YGR266W	YGR266W	-0.01	-0.01	62.3	72.5	61.8697	71.9992	0	0.218749	0.218749	0.252054
YGR267C	FOL2	-0.07	-0.02	528.3	635.8	503.279	627.047	0.05	0.267216	0.317216	0.315155
YGR270W	YTA7	0.22	0.38	28.7	28.4	33.4279	36.9581	0.16	-0.0151598	0.14484	0.032743
YGR271C-A	EFG1	0.07	0.14	164.3	173	172.468	190.63	0.07	0.0744396	0.14444	0.062545
YGR271W	SLH1	0.18	0.32	13.5	14.8	15.2939	18.4753	0.14	0.132638	0.272638	0.201602
YGR274C	TAF1	0.18	0.21	34.1	34.3	38.6313	39.6744	0.03	0.00843684	0.0384368	-0.10064
YGR275W	RTT102	0.02	0.08	111.8	100.9	113.361	106.653	0.06	-0.147994	-0.087994	0.084663
YGR276C	RNH70	-0.02	-0.02	97.8	103	96.4536	101.582	0	0.074738	0.074738	0.209545
YGR277C	CAB4	-0.13	-0.19	125.2	121.3	114.412	106.332	-0.06	-0.045655	-0.105655	0.796434
YGR278W	CWC22	0.16	0.22	26.2	26.6	29.2729	30.9819	0.06	0.0218594	0.0818594	0.380363
YGR279C	SCW4	0.15	-0.04	285	283.4	316.227	275.65	-0.19	-0.00812216	-0.198122	-0.144802
YGR280C	PXR1	0.05	0.36	71.1	65.1	73.6073	83.551	0.31	-0.127192	0.182808	-0.1328
YGR281W	YOR1	0.13	0.31	22.4	21.3	24.5122	26.4058	0.18	-0.0726453	0.107355	1.10884
YGR282C	BGL2	0	-0.18	999	937.7	999	827.711	-0.18	-0.0913582	-0.271358	-0.204811
YGR283C	YGR283C	-0.05	-0.24	60.1	73.3	58.0528	62.0664	-0.19	0.286448	0.0964482	0.063024
YGR284C	ERV29	0.02	-0.19	251.6	231.1	255.112	202.584	-0.21	-0.122615	-0.332615	-0.256748
YGR285C	ZUO1	0.05	0.15	405.2	374.2	419.489	415.201	0.1	-0.114825	-0.0148246	-0.064259
YGR286C	BIO2	-0.01	-0.03	197.5	123.7	196.136	121.154	-0.02	-0.675007	-0.695007	-0.647979
YGR295C	COS6	-0.34	-0.07	67	56.3	52.9328	53.6335	0.27	-0.251026	0.0189738	0.254478
YHL001W	RPL14B	-0.21	0	955.9	659.4	826.411	659.4	0.21	-0.535706	-0.325706	-0.308377
YHL002W	HSE1	0.11	0.25	67.3	82.1	72.6321	97.6339	0.14	0.286776	0.426776	0.08435
YHL003C	LAG1	-0.09	-0.04	206.5	217.1	194.011	211.163	0.05	0.0722179	0.122218	0.090353
YHL004W	MRP4	0.16	0.35	54.1	48.5	60.4452	61.8162	0.19	-0.157644	0.0323562	0.041452
YHL007C	STE20	0.21	0.19	27.9	27.5	32.2716	31.371	-0.02	-0.0208335	-0.0408335	-0.111071
YHL009C	YAP3	0.03	0.16	30.1	28.7	30.7325	32.0661	0.13	-0.0687128	0.0612872	-0.674934
YHL010C	ETP1	0.28	0.42	13.3	10.8	16.1488	14.4496	0.14	-0.300395	-0.160395	0.388627
YHL011C	PRS3	-0.1	-0.09	349.4	299.6	326.002	281.481	0.01	-0.221842	-0.211842	-0.254964
YHL013C	OTU2	-0.09	0.07	72.9	77.9	68.4912	81.7729	0.16	0.0957045	0.255705	-0.058631
YHL014C	YLF2	-0.05	0.06	34.8	37.4	33.6146	38.9882	0.11	0.103951	0.213951	0.069076
YHL015W	RPS20	-0.05	-0.14	6987	5224.7	6749	4741.52	-0.09	-0.419325	-0.509325	-0.283643
YHL017W	YHL017W	0.1	0.17	45	44.9	48.2298	50.5151	0.07	-0.00320956	0.0667904	-0.451567
YHL018W	YHL018W	-0.03	0.5	10.8	8.6	10.5777	12.1622	0.53	-0.328623	0.201377	-0.143295
YHL019C	APM2	0.11	0.21	27	23.4	29.1392	27.0665	0.1	-0.206451	-0.106451	0.123106
YHL020C	OPI1	-0.03	-0.15	199.5	188.6	195.394	169.976	-0.12	-0.0810591	-0.201059	0.155734
YHL021C	AIM17	0.02	-0.08	47.2	47.6	47.8589	45.0323	-0.1	0.0121747	-0.0878253	0.326879
YHL023C	NPR3	0.16	0.12	17.9	22.3	19.9994	24.2342	-0.04	0.317084	0.277084	-2.46744
YHL024W	RIM4	0.01	-0.11	2.3	3.1	2.316	2.87242	-0.12	0.430634	0.310634	-0.654514
YHL025W	SNF6	0	-0.11	117.3	129.3	117.3	119.808	-0.11	0.140519	0.0305193	0.978884
YHL029C	OCA5	-0.05	-0.03	25.8	32.6	24.9212	31.9291	0.02	0.337501	0.357501	0.286403
YHL030W	ECM29	0.2	0.24	18.6	17.2	21.3658	20.3131	0.04	-0.112894	-0.0728941	-0.146804
YHL031C	GOS1	-0.05	-0.09	63.2	61.5	61.0472	57.7806	-0.04	-0.0393381	-0.0793381	0.087656
YHL033C	RPL8A	-0.06	-0.06	886.2	706.2	850.1	677.432	0	-0.327556	-0.327556	-0.204643
YHL034C	SBP1	0.12	0.29	237.4	183.5	257.991	224.354	0.17	-0.37154	-0.20154	-0.101831
YHL035C	VMR1	0.22	0.37	21.7	7.2	25.2747	9.30494	0.15	-1.59163	-1.44163	0.432012
YHL038C	CBP2	0.23	0.25	29	37.9	34.0122	45.0709	0.02	0.386145	0.406145	0.222806
YHL039W	EFM1	0.07	0.11	49.4	56.2	51.856	60.6526	0.04	0.186059	0.226059	0.106192
YHL048W	COS8	-0.31	-0.07	58.1	42.2	46.8659	40.2013	0.24	-0.461295	-0.221295	0.012695
YHL050C	YHL050C	-0.75	-0.12	18.9	13.5	11.238	12.4225	0.63	-0.485427	0.144573	-0.79391
YHR001W	OSH7	0.05	0.11	108.7	100.8	112.533	108.786	0.06	-0.108856	-0.0488563	-0.01644
YHR001W-A	QCR10	-0.06	0.12	190.8	149.4	183.028	162.358	0.18	-0.352881	-0.172881	-0.497891
YHR003C	YHR003C	-0.06	0.11	83.3	95.1	79.9067	102.635	0.17	0.191129	0.361129	0.199206
YHR005C	GPA1	0.04	0.14	157.9	145.5	162.339	160.327	0.1	-0.117992	-0.017992	-0.09964
YHR005C-A	TIM10	0.11	0.12	797.1	779.1	860.253	846.675	0.01	-0.0329522	-0.0229522	0.545353
YHR006W	STP2	0.11	0.12	71.6	95.5	77.2727	103.783	0.01	0.415541	0.425541	0.422726
YHR007C	ERG11	-0.06	-0.04	496.6	478.2	476.371	465.124	0.02	-0.0544701	-0.0344701	-0.351479
YHR008C	SOD2	0.09	-0.11	95.9	74.9	102.073	69.4014	-0.2	-0.356565	-0.556565	-0.961082
YHR009C	YHR009C	-0.14	-0.25	85.3	70	77.4114	58.8627	-0.11	-0.285191	-0.395191	-0.209734
YHR010W	RPL27A	-0.12	-0.2	6257.6	4784.4	5758.17	4165.06	-0.08	-0.387271	-0.467271	-0.259245
YHR011W	DIA4	0.13	-0.15	13	13.8	14.2258	12.4373	-0.28	0.0861566	-0.193843	0.322562
YHR012W	VPS29	-0.09	0.06	116.1	120.7	109.079	125.826	0.15	0.0560577	0.206058	-0.02906
YHR013C	ARD1	0.26	0.23	91.3	84.4	109.33	98.9873	-0.03	-0.113372	-0.143372	-0.09444
YHR015W	MIP6	-0.16	0.15	4.5	3.4	4.02761	3.77254	0.31	-0.40439	-0.0943903	-3.59187
YHR016C	YSC84	-0.3	-0.01	47.4	33.4	38.5008	33.1693	0.29	-0.505039	-0.215039	-0.204032
YHR017W	YSC83	-0.26	-0.13	65.3	68.3	54.5312	62.4147	0.13	0.0648026	0.194803	-0.065255
YHR018C	ARG4	-0.08	-0.04	1347.3	1817.9	1274.62	1768.19	0.04	0.432202	0.472202	0.556087
YHR019C	DED81	0.06	0.12	362.6	363.8	377.998	395.354	0.06	0.00476662	0.0647666	-0.037214
YHR020W	YHR020W	0.04	-0.11	292.5	308.8	300.723	286.13	-0.15	0.0782361	-0.0717639	-0.045673
YHR021C	RPS27B	-0.03	-0.16	5908.4	4901.4	5786.81	4386.88	-0.13	-0.269574	-0.399574	-0.30181
YHR023W	MYO1	0.18	0.35	24.7	27.4	27.9822	34.923	0.17	0.149665	0.319665	0.190404
YHR024C	MAS2	-0.02	0.23	86.4	84.2	85.2105	98.7527	0.25	-0.0372111	0.212789	0.270071
YHR025W	THR1	0.18	0.18	172.4	228.6	195.309	258.977	0	0.407066	0.407066	0.392015
YHR027C	RPN1	0.2	0.21	181.2	156.5	208.144	181.022	0.01	-0.21142	-0.20142	-0.060984
YHR028C	DAP2	0.18	0.21	82.5	92.7	93.4629	107.225	0.03	0.168175	0.198175	-0.029968
YHR029C	YHI9	0	0.03	394.9	1406.4	394.9	1435.95	0.03	1.83245	1.86245	1.57173
YHR030C	SLT2	0.15	0.1	133.8	132.9	148.46	142.439	-0.05	-0.00973701	-0.059737	0.017688
YHR033W	YHR033W	0.22	-0.15	19.2	12.6	22.3629	11.3558	-0.37	-0.607683	-0.977683	-1.17377
YHR034C	PIH1	-0.25	-0.15	29.7	31.3	24.9746	28.2091	0.1	0.0756997	0.1757	0.077648
YHR036W	BRL1	-0.08	0	26.5	27.6	25.0705	27.6	0.08	0.0586759	0.138676	-0.044617
YHR037W	PUT2	0.13	0.15	60.7	75.5	66.4236	83.7725	0.02	0.31478	0.33478	0.367594
YHR038W	RRF1	-0.07	0.41	41.9	30.1	39.9155	39.9934	0.48	-0.477187	0.00281324	-0.223829
YHR039C	MSC7	0.11	-0.06	116.4	138.8	125.622	133.146	-0.17	0.253917	0.0839165	0.184879
YHR039C-A	VMA10	-0.01	0.12	764.1	719.7	758.822	782.123	0.13	-0.0863658	0.0436342	-0.050539
YHR040W	BCD1	-0.26	-0.26	41.7	48.3	34.8232	40.3347	0	0.211976	0.211976	0.07432
YHR041C	SRB2	-0.25	-0.43	59.3	53.2	49.8652	39.4883	-0.18	-0.156606	-0.336606	-0.239754
YHR042W	NCP1	0.18	0.17	71.1	62.6	80.548	70.4287	-0.01	-0.183687	-0.193687	-0.275466
YHR043C	DOG2	-0.09	-0.11	126.8	92.7	119.131	85.8947	-0.02	-0.451914	-0.471914	-0.09992
YHR044C	DOG1	-0.28	0.06	29	20.2	23.8841	21.0578	0.34	-0.521698	-0.181698	-0.451284
YHR045W	YHR045W	0	0.17	83	88.5	83	99.5677	0.17	0.0925661	0.262566	0.176179
YHR046C	INM1	0.03	0.13	80.2	81.8	81.8852	89.5132	0.1	0.0284986	0.128499	-0.029043
YHR047C	AAP1	0.11	0.04	59.8	84.6	64.5378	86.9784	-0.07	0.500512	0.430512	0.200682
YHR049W	FSH1	-0.16	-0.19	375.8	226.9	336.35	198.902	-0.03	-0.727908	-0.757908	-0.697108
YHR051W	COX6	-0.15	-0.02	551.3	500.4	496.859	493.511	0.13	-0.139756	-0.00975581	-0.108952
YHR052W	CIC1	-0.01	0.11	261	270	259.197	291.392	0.12	0.0489096	0.16891	-0.022027
YHR056C	RSC30	0.3	0.27	13.1	13	16.128	15.6755	-0.03	-0.0110552	-0.0410552	0.069029
YHR057C	CPR2	0.07	-0.05	136.8	118.9	143.601	114.85	-0.12	-0.20232	-0.32232	-0.03723
YHR058C	MED6	0.16	0.11	40.8	45.3	45.5853	48.889	-0.05	0.150942	0.100942	0.03511
YHR059W	FYV4	-0.08	0.07	71.5	74.1	67.6431	77.784	0.15	0.0515303	0.20153	0.053099
YHR060W	VMA22	-0.37	-0.33	120.3	120.8	93.086	96.1008	0.04	0.00598381	0.0459838	-0.102871
YHR062C	RPP1	0.12	0.05	49.9	62.3	54.2281	64.497	-0.07	0.320192	0.250192	0.133863
YHR063C	PAN5	-0.1	-0.06	339.2	582.2	316.485	558.484	0.04	0.779379	0.819379	0.831364
YHR064C	SSZ1	-0.09	-0.27	505.8	462	475.211	383.146	-0.18	-0.130674	-0.310674	-0.035088
YHR065C	RRP3	0.06	0.16	127.7	128.4	133.123	143.46	0.1	0.00788668	0.107887	0.159161
YHR066W	SSF1	-0.13	0.04	96.6	84.9	88.2761	87.2869	0.17	-0.186259	-0.0162586	-0.006951
YHR068W	DYS1	0.19	0.18	257.4	183.8	293.633	208.224	-0.01	-0.485875	-0.495875	-0.311835
YHR069C	RRP4	-0.09	-0.15	123.5	136.9	116.031	123.381	-0.06	0.148611	0.0886114	0.107479
YHR070W	TRM5	0.1	-0.05	50.4	51.2	54.0174	49.4559	-0.15	0.0227201	-0.12728	-0.132702
YHR072W	ERG7	-0.04	-0.09	121.1	166.8	117.789	156.712	-0.05	0.46192	0.41192	0.340555
YHR072W-A	NOP10	-0.2	0	1231.1	1212.6	1071.73	1212.6	0.2	-0.0218442	0.178156	-0.172043
YHR073W	OSH3	0.2	0.29	44.5	44.2	51.1171	54.0407	0.09	-0.00975897	0.080241	0.035748
YHR074W	QNS1	0.14	0.12	88.1	95.6	97.0778	103.892	-0.02	0.117869	0.0978686	0.13392
YHR075C	PPE1	-0.13	0.06	16.4	19.6	14.9868	20.4323	0.19	0.257158	0.447158	-0.089555
YHR076W	PTC7	-0.17	0	109.7	120.3	97.506	120.3	0.17	0.133073	0.303073	0.200053
YHR077C	NMD2	0.12	0.39	44.6	40.2	48.4684	52.6778	0.27	-0.149848	0.120152	-0.103313
YHR079C	IRE1	0.33	0.33	12.1	12.9	15.2099	16.2155	0	0.092364	0.092364	-0.485691
YHR080C	YHR080C	0.36	0.24	17.3	18	22.2033	21.2579	-0.12	0.0572249	-0.0627751	-0.621652
YHR081W	LRP1	-0.09	0.06	142.1	154.4	133.506	160.957	0.15	0.119766	0.269766	0.094751
YHR082C	KSP1	0.26	0.26	25.8	26.9	30.895	32.2122	0	0.0602351	0.0602351	0.532607
YHR084W	STE12	0.09	0.15	23.3	23.1	24.7998	25.6311	0.06	-0.0124371	0.0475629	-0.059817
YHR085W	IPI1	0.04	0.03	80.2	89	82.4547	90.8701	-0.01	0.150203	0.140203	-0.0209
YHR086W	NAM8	0.17	-0.11	35.2	28.8	39.6021	26.6857	-0.28	-0.289507	-0.569507	-0.208901
YHR087W	RTC3	-0.23	0.29	49.5	16.9	42.2054	20.6626	0.52	-1.55041	-1.03041	-1.90489
YHR088W	RPF1	-0.05	0.21	110.4	121.2	106.639	140.191	0.26	0.13465	0.39465	0.087703
YHR089C	GAR1	-0.27	-0.09	676.8	587.3	561.283	551.782	0.18	-0.204632	-0.0246319	-0.141167
YHR091C	MSR1	0.25	0.31	29.5	31.4	35.0816	38.9268	0.06	0.0900496	0.15005	0.043114
YHR092C	HXT4	0.02	-0.05	42.7	17.5	43.2961	16.9039	-0.07	-1.28688	-1.35688	-1.04322
YHR094C	HXT1	-0.23	-0.18	75.8	47.2	64.6297	41.6636	0.05	-0.683411	-0.633411	-1.11216
YHR096C	HXT5	0.03	-0.09	4.7	4.1	4.79876	3.85204	-0.12	-0.197037	-0.317037	-2.43044
YHR097C	YHR097C	0.22	0.08	30.6	23.5	35.6408	24.8399	-0.14	-0.380871	-0.520871	-0.281414
YHR098C	SFB3	0	-0.05	55.1	56.3	55.1	54.3822	-0.05	0.0310826	-0.0189174	0.032205
YHR099W	TRA1	0.25	0.22	11.8	15.5	14.0326	18.0534	-0.03	0.393481	0.363481	-0.056459
YHR100C	GEP4	0.23	0.24	40.1	51.5	47.0307	60.8211	0.01	0.36097	0.37097	0.208268
YHR102W	KIC1	0.49	0.2	13.2	16.8	18.5387	19.2981	-0.29	0.347923	0.0579233	0.035491
YHR103W	SBE22	0.28	0.18	45.5	50.8	55.2459	57.5505	-0.1	0.158962	0.058962	0.244004
YHR104W	GRE3	0.03	-0.02	51.1	37.6	52.1737	37.0823	-0.05	-0.442591	-0.492591	-0.636728
YHR106W	TRR2	-0.07	0.04	54.9	60.6	52.2998	62.3037	0.11	0.142512	0.252512	-0.298898
YHR107C	CDC12	0.25	0.4	94.1	81.1	111.904	107.012	0.15	-0.214493	-0.0644928	0.031796
YHR108W	GGA2	0.2	0.12	94.5	90	108.552	97.8061	-0.08	-0.0703893	-0.150389	0.016751
YHR111W	UBA4	-0.05	0	77	90.3	74.3771	90.3	0.05	0.229868	0.279868	0.337544
YHR112C	YHR112C	-0.09	-0.09	58.3	79.5	54.7742	74.6921	0	0.447459	0.447459	0.075173
YHR113W	YHR113W	0.19	0.19	83	69.6	94.6834	79.3972	0	-0.254024	-0.254024	-0.177891
YHR114W	BZZ1	0.24	0.26	27.4	26.2	32.3592	31.3739	0.02	-0.0646091	-0.0446091	-0.045405
YHR115C	DMA1	0.08	0.05	48.6	57.8	51.3711	59.8383	-0.03	0.250113	0.220113	0.343736
YHR116W	COX23	-0.15	-0.41	34.2	32.4	30.8228	24.385	-0.26	-0.0780025	-0.338003	0.078031
YHR117W	TOM71	0.27	0.3	37.7	35.1	45.459	43.2132	0.03	-0.103093	-0.0730935	0.094401
YHR118C	ORC6	0.22	0.17	29.1	31.5	33.8937	35.4393	-0.05	0.114333	0.0643327	0.185905
YHR119W	SET1	0.31	0.35	22.7	23.6	28.1414	30.0796	0.04	0.0560946	0.0960946	-0.568363
YHR120W	MSH1	0.21	0.29	23.4	30.8	27.0665	37.6573	0.08	0.396422	0.476422	-0.06112
YHR121W	LSM12	-0.05	-0.03	261.1	263.9	252.206	258.469	0.02	0.0153889	0.0353889	0.039225
YHR122W	YHR122W	-0.11	-0.05	185.2	348.2	171.604	336.339	0.06	0.910832	0.970832	0.103611
YHR127W	YHR127W	-0.06	0.06	63.3	58.2	60.7214	60.6715	0.12	-0.121186	-0.00118635	0.055192
YHR128W	FUR1	-0.08	-0.06	263.2	204.1	249.002	195.786	0.02	-0.366883	-0.346883	-0.658552
YHR132C	ECM14	0.08	0.09	124.3	127.7	131.387	135.92	0.01	0.0389322	0.0489322	0.285983
YHR132W-A	IGO2	0.03	0.06	173.7	198.3	177.35	206.721	0.03	0.191087	0.221087	0.128189
YHR133C	NSG1	-0.05	-0.22	215	232.1	207.676	199.273	-0.17	0.11041	-0.0595901	0.158371
YHR135C	YCK1	-0.03	-0.04	67.9	75.6	66.5026	73.5327	-0.01	0.154975	0.144975	0.137803
YHR136C	SPL2	-0.13	-0.23	357.3	315.1	326.512	268.665	-0.1	-0.181326	-0.281326	-0.169965
YHR137W	ARO9	0.15	0.1	21.8	19.8	24.1886	21.2211	-0.05	-0.138828	-0.188828	0.431529
YHR138C	YHR138C	-0.08	-0.13	102.8	88.9	97.2547	81.2396	-0.05	-0.209585	-0.259585	-0.181289
YHR141C	RPL42B	-0.33	-0.32	3719.1	2991.3	2958.68	2396.24	0.01	-0.314181	-0.304181	-0.277376
YHR143W-A	RPC10	-0.01	0.2	419.5	401.3	416.602	460.973	0.21	-0.0639897	0.14601	-0.067188
YHR144C	DCD1	-0.2	-0.04	68	70	59.1974	68.0858	0.16	0.0418202	0.20182	0.209167
YHR146W	CRP1	-0.21	-0.03	101.8	100.7	88.0099	98.6276	0.18	-0.0156739	0.164326	0.100412
YHR147C	MRPL6	-0.04	0.03	134.3	132.5	130.628	135.284	0.07	-0.0194669	0.0505331	0.052932
YHR148W	IMP3	0.01	0.3	89.5	106.5	90.1225	131.117	0.29	0.250894	0.540894	0.066936
YHR149C	SKG6	0.11	0.14	39.6	43.4	42.7374	47.8227	0.03	0.132195	0.162195	-0.452297
YHR154W	RTT107	0.2	0.35	38	35.8	43.6505	45.6293	0.15	-0.0860398	0.0639602	-0.060579
YHR156C	LIN1	-0.06	0.05	32.4	37.6	31.0802	38.926	0.11	0.214739	0.324739	-0.147012
YHR158C	KEL1	0.19	0.28	25.4	25.6	28.9754	31.0834	0.09	0.0113153	0.101315	-0.079519
YHR159W	YHR159W	0.13	0.03	17.7	16.3	19.369	16.6425	-0.1	-0.118877	-0.218877	-0.052456
YHR161C	YAP1801	-0.08	0.01	71.4	70.4	67.5485	70.8897	0.09	-0.0203486	0.0696514	-0.228154
YHR163W	SOL3	-0.03	-0.09	303.3	345.7	297.058	324.793	-0.06	0.188775	0.128775	-0.281939
YHR164C	DNA2	0.31	0.47	9.9	10.9	12.2731	15.0977	0.16	0.138828	0.298828	-0.054816
YHR165C	PRP8	0.04	-0.01	20.1	25.5	20.6651	25.3239	-0.05	0.343302	0.293302	-0.063756
YHR166C	CDC23	0.1	0.13	36.4	57.3	39.0126	62.703	0.03	0.654597	0.684597	0.190188
YHR167W	THP2	-0.28	-0.01	56.3	68.8	46.3682	68.3248	0.27	0.289274	0.559274	0.213481
YHR169W	DBP8	-0.02	0.06	72.7	89.1	71.6991	92.8837	0.08	0.29347	0.37347	0.103725
YHR170W	NMD3	0.03	0.18	223.2	206.3	227.89	233.714	0.15	-0.113593	0.0364068	-0.061855
YHR171W	ATG7	-0.05	0.08	19.4	15.2	18.7392	16.0667	0.13	-0.351985	-0.221985	-0.483997
YHR172W	SPC97	0.35	0.1	15.3	17.5	19.5008	18.756	-0.25	0.193823	-0.0561767	0.036335
YHR174W	ENO2	-0.08	-0.23	7602	6247.6	7191.93	5326.92	-0.15	-0.283077	-0.433077	-0.331192
YHR178W	STB5	-0.12	0.01	18.9	18	17.3915	18.1252	0.13	-0.0703893	0.0596107	0.239889
YHR179W	OYE2	0.05	-0.07	273.1	273.5	282.731	260.546	-0.12	0.00211152	-0.117888	-0.052274
YHR183W	GND1	0.02	-0.02	863.1	872.7	875.148	860.685	-0.04	0.0159581	-0.0240419	-0.037084
YHR186C	KOG1	0.19	0.07	15.8	17.5	18.0241	18.37	-0.12	0.14743	0.0274304	0.050256
YHR187W	IKI1	0	-0.19	77	96.1	77	84.2418	-0.19	0.319678	0.129678	-0.152872
YHR188C	GPI16	0.05	-0.02	55.1	54.7	57.0431	53.9469	-0.07	-0.0105115	-0.0805115	0.05064
YHR190W	ERG9	-0.05	-0.03	269.2	279.8	260.03	274.042	0.02	0.0557176	0.0757176	0.074566
YHR192W	YHR192W	-0.09	-0.11	66.4	74.5	62.3843	69.0308	-0.02	0.166057	0.146057	0.09821
YHR193C	EGD2	0.11	0.07	1258.2	974	1357.88	1022.42	-0.04	-0.369368	-0.409368	-0.469543
YHR195W	NVJ1	-0.15	-0.14	106.5	112.2	95.9832	101.824	0.01	0.0752192	0.0852192	-0.020417
YHR196W	UTP9	-0.04	0.15	156.6	166.3	152.318	184.521	0.19	0.086704	0.276704	-0.014067
YHR197W	RIX1	0	0.11	65.2	68	65.2	73.3875	0.11	0.0606628	0.170663	0.1169
YHR198C	AIM18	0.05	0.2	41.4	41.1	42.86	47.2115	0.15	-0.0104924	0.139508	0.064442
YHR199C	AIM46	0.07	0.09	67.5	86.8	70.8559	92.3873	0.02	0.362808	0.382808	0.220628
YHR200W	RPN10	-0.15	-0.11	234.4	211.5	211.253	195.973	0.04	-0.148315	-0.108315	0.008971
YHR201C	PPX1	-0.09	0.07	173.8	168.2	163.289	176.562	0.16	-0.0472504	0.11275	-0.114443
YHR202W	YHR202W	-0.08	-0.06	18	28.9	17.029	27.7227	0.02	0.683073	0.703073	0.290907
YHR203C	RPS4B	0.01	-0.04	1340.8	944.2	1350.13	918.381	-0.05	-0.50593	-0.55593	-0.282785
YHR205W	SCH9	0.15	0	25	26.8	27.7392	26.8	-0.15	0.100305	-0.0496951	-0.265901
YHR206W	SKN7	0.34	0.22	25.5	28.9	32.2768	33.6608	-0.12	0.180572	0.0605722	0.074116
YHR207C	SET5	-0.04	0.1	67	69.8	65.1679	74.8098	0.14	0.0590659	0.199066	0.136203
YHR208W	BAT1	0.1	-0.03	1196.1	1668.6	1281.95	1634.26	-0.13	0.4803	0.3503	0.449222
YHR209W	CRG1	0.09	0.08	41.2	32.3	43.8521	34.1417	-0.01	-0.35111	-0.36111	-0.366572
YHR215W	PHO12	-0.13	-0.12	430.6	283.6	393.496	260.965	0.01	-0.602491	-0.592491	-0.403046
YHR216W	IMD2	-0.03	0.02	166.1	126.9	162.682	128.671	0.05	-0.38836	-0.33836	-0.750105
YHR219W	YHR219W	-1.11	-0.26	35.1	21	16.2616	17.5368	0.85	-0.741082	0.108918	-0.79391
YIL002C	INP51	0.25	0.39	23.6	21.6	28.0653	28.3045	0.14	-0.127756	0.0122445	-0.442416
YIL002W-A	YIL002W-A	-0.22	-0.05	271.1	267.5	232.757	258.388	0.17	-0.0192862	0.150714	0.686394
YIL003W	CFD1	-0.18	-0.16	61.6	97.4	54.3745	87.1754	0.02	0.660991	0.680991	0.61552
YIL004C	BET1	-0.05	-0.02	107.4	120	103.742	118.348	0.03	0.16004	0.19004	0.28523
YIL005W	EPS1	0.23	0.29	34.3	33.4	40.2282	40.8362	0.06	-0.0383605	0.0216395	0.013034
YIL007C	NAS2	0.04	0.08	49.8	51.8	51.2001	54.7535	0.04	0.0568064	0.0968064	0.090265
YIL009W	FAA3	0	0.19	49.2	33.3	49.2	37.9874	0.19	-0.563136	-0.373136	-0.454796
YIL010W	DOT5	0.31	0.3	53.7	68.2	66.5723	83.964	-0.01	0.34485	0.33485	0.364667
YIL014W	MNT3	0.08	0.21	61.3	63.5	64.7952	73.4497	0.13	0.0508695	0.18087	-0.314554
YIL015W	BAR1	0.16	0.11	87.4	73	97.6509	78.7837	-0.05	-0.259737	-0.309737	-0.417504
YIL016W	SNL1	0.01	0.23	168.1	147.8	169.269	173.345	0.22	-0.185673	0.0343265	0.009155
YIL017C	VID28	0.14	0.2	26.6	36	29.3107	41.3531	0.06	0.436571	0.496571	0.009982
YIL018W	RPL2B	-0.24	-0.34	3616.1	2977.7	3061.92	2352.51	-0.1	-0.280236	-0.380236	-0.209897
YIL019W	FAF1	-0.12	0.25	58.6	57.5	53.923	68.3794	0.37	-0.0273387	0.342661	0.039593
YIL020C	HIS6	0.05	0.19	77.3	83.5	80.026	95.2538	0.14	0.111308	0.251308	0.249564
YIL021W	RPB3	-0.02	0.1	188.7	171.3	186.102	183.595	0.12	-0.139569	-0.0195693	-0.016556
YIL022W	TIM44	0.09	0.2	89.7	89.1	95.474	102.349	0.11	-0.00968255	0.100317	0.172763
YIL026C	IRR1	0.24	0.33	22.4	20.3	26.4542	25.5174	0.09	-0.142019	-0.052019	-0.052649
YIL027C	KRE27	-0.08	-0.1	219.2	233.5	207.376	217.863	-0.02	0.0911748	0.0711748	-0.033053
YIL030C	SSM4	0.08	0.13	37.5	41.4	39.6382	45.3038	0.05	0.14274	0.19274	0.142695
YIL031W	ULP2	0.36	0.22	9.2	10.5	11.8075	12.2297	-0.14	0.190684	0.0506836	0.194358
YIL033C	BCY1	0.07	-0.15	78	64.2	81.8779	57.8603	-0.22	-0.280901	-0.500901	-0.160185
YIL034C	CAP2	0.03	0.07	89.5	89.8	91.3806	94.2646	0.04	0.00482776	0.0448278	0.155756
YIL035C	CKA1	-0.03	0.11	184.3	175.8	180.507	189.728	0.14	-0.068121	0.071879	0.075774
YIL036W	CST6	0.32	0.41	32.1	41.5	40.0714	55.1405	0.09	0.370538	0.460538	0.173416
YIL038C	NOT3	0	0.09	45.5	48.2	45.5	51.3026	0.09	0.0831666	0.173167	-0.027554
YIL039W	TED1	0.14	0.17	130.9	128.3	144.239	144.345	0.03	-0.0289439	0.00105607	-0.068105
YIL041W	GVP36	0.27	0.07	148.5	159.9	179.062	167.85	-0.2	0.106707	-0.093293	0.140465
YIL042C	PKP1	0.25	-0.08	11.2	16.2	13.3191	15.3261	-0.33	0.532495	0.202495	0.299254
YIL043C	CBR1	-0.28	-0.43	570.2	544.5	469.612	404.162	-0.15	-0.066536	-0.216536	-0.116808
YIL044C	AGE2	0.44	0.34	89.2	95.6	121.009	121.006	-0.1	0.0999669	-3.30919e-05	0.395176
YIL045W	PIG2	0	0.19	19	18.9	19	21.5604	0.19	-0.00761318	0.182387	-1.13598
YIL046W	MET30	0.21	0.01	39.3	49	45.4578	49.3408	-0.2	0.318252	0.118252	-0.110465
YIL047C	SYG1	-0.1	0.09	48.5	62.9	45.2521	66.9489	0.19	0.375075	0.565075	0.282807
YIL048W	NEO1	0.32	0.26	27.5	27.3	34.3291	32.6912	-0.06	-0.0105307	-0.0705307	-0.062041
YIL051C	MMF1	-0.09	-0.04	429.9	410.4	403.901	399.178	0.05	-0.0669704	-0.0169704	-0.10117
YIL052C	RPL34B	-0.13	-0.13	2897.1	2116.6	2647.46	1934.22	0	-0.452861	-0.452861	-1.04414
YIL053W	RHR2	-0.03	-0.07	1492.3	1107.8	1461.59	1055.33	-0.04	-0.42984	-0.46984	-0.732814
YIL055C	YIL055C	0.25	0.17	6.4	5.2	7.61093	5.8503	-0.08	-0.29956	-0.37956	-0.741542
YIL056W	VHR1	0.08	0.07	24.4	28.9	25.7912	30.3368	-0.01	0.244188	0.234188	0.048316
YIL061C	SNP1	0	-0.08	27.1	37.7	27.1	35.6664	-0.08	0.476272	0.396272	0.144235
YIL062C	ARC15	0.13	0.05	377.5	432.2	413.096	447.442	-0.08	0.195222	0.115222	0.289984
YIL063C	YRB2	-0.22	0.06	144	125	123.633	130.308	0.28	-0.204141	0.0758593	-0.141899
YIL064W	SEE1	-0.07	-0.01	91	107.4	86.6901	106.658	0.06	0.239056	0.299056	-0.076202
YIL065C	FIS1	-0.31	-0.24	95.3	101.3	76.873	85.7753	0.07	0.0880861	0.158086	0.200061
YIL066C	RNR3	0.47	-0.11	1.4	2.4	1.93915	2.22381	-0.58	0.777608	0.197608	-0.134366
YIL068C	SEC6	0.31	0.42	32.7	27.6	40.5384	36.9268	0.11	-0.244622	-0.134622	0.125896
YIL069C	RPS24B	0	0.04	736.3	548.7	736.3	564.126	0.04	-0.424276	-0.384276	-0.237344
YIL070C	MAM33	-0.12	0.07	136.7	127.4	125.79	133.734	0.19	-0.101648	0.088352	0.084862
YIL074C	SER33	-0.03	-0.17	142.2	277.8	139.274	246.92	-0.14	0.966125	0.826125	0.927804
YIL075C	RPN2	0.17	0.13	201.4	185.7	226.587	203.21	-0.04	-0.11709	-0.15709	0.022878
YIL076W	SEC28	0.15	0.06	359.8	313.1	399.223	326.396	-0.09	-0.200572	-0.290572	-0.096064
YIL078W	THS1	0.05	0.02	657.9	701.6	681.101	711.394	-0.03	0.0927804	0.0627804	0.186158
YIL079C	AIR1	0.11	0.38	49.9	66.8	53.8535	86.9296	0.27	0.420808	0.690808	-0.130379
YIL083C	CAB2	-0.03	0.16	70.9	82.5	69.4409	92.1762	0.19	0.218608	0.408608	0.178536
YIL084C	SDS3	0.15	0.17	23.6	18.6	26.1858	20.9261	0.02	-0.343484	-0.323484	-0.40449
YIL085C	KTR7	-0.12	-0.05	80.2	81.1	73.799	78.3374	0.07	0.0160997	0.0860997	0.004352
YIL090W	ICE2	0.16	0.17	38.5	46.6	43.0156	52.4277	0.01	0.275472	0.285472	-0.070898
YIL091C	UTP25	0.15	0.33	74.1	75.5	82.2191	94.9045	0.18	0.0270031	0.207003	-0.050096
YIL093C	RSM25	-0.21	-0.11	121.2	122.1	104.782	113.136	0.1	0.0106735	0.110674	0.198528
YIL094C	LYS12	0.02	0	407.4	612.5	413.087	612.5	-0.02	0.588264	0.568264	0.603802
YIL095W	PRK1	0.07	-0.01	15.6	21.7	16.3756	21.5501	-0.08	0.476149	0.396149	0.091316
YIL096C	YIL096C	-0.02	0.24	46	45.8	45.3667	54.0895	0.26	-0.00628626	0.253714	-0.043822
YIL097W	FYV10	0.13	0.21	15.9	16.4	17.3993	18.9697	0.08	0.044669	0.124669	-0.059912
YIL098C	FMC1	0	0.07	90.7	92.2	90.7	96.7839	0.07	0.0236642	0.0936642	0.300341
YIL103W	DPH1	-0.07	-0.04	78.1	80.4	74.401	78.2015	0.03	0.041873	0.071873	0.020668
YIL104C	SHQ1	0	0.11	47.9	49.4	47.9	53.3139	0.11	0.0444854	0.154485	-0.061723
YIL105C	SLM1	0.3	0.12	52.4	50.6	64.512	54.9888	-0.18	-0.0504294	-0.230429	0.116244
YIL106W	MOB1	-0.01	-0.02	51.1	59.5	50.747	58.6808	-0.01	0.219566	0.209566	0.213343
YIL107C	PFK26	0.07	0.18	23.3	22.8	24.4584	25.8298	0.11	-0.0312961	0.0787039	-0.627161
YIL108W	YIL108W	0.2	0.05	38.6	34.8	44.3398	36.0272	-0.15	-0.149514	-0.299514	-0.136545
YIL109C	SEC24	0.06	-0.05	107.5	98	112.065	94.6618	-0.11	-0.133483	-0.243483	-0.044627
YIL110W	HPM1	-0.06	-0.1	110.8	130.9	106.286	122.134	-0.04	0.240507	0.200507	-0.377105
YIL111W	COX5B	0.01	0.02	152.2	214.4	153.259	217.393	0.01	0.494337	0.504337	0.225504
YIL112W	HOS4	0.26	0.31	26.4	27.9	31.6134	34.5878	0.05	0.0797272	0.129727	0.301164
YIL115C	NUP159	0.07	0.2	38.6	41.5	40.5191	47.671	0.13	0.10451	0.23451	-0.146763
YIL116W	HIS5	-0.07	-0.09	614.6	1032.6	585.491	970.151	-0.02	0.748562	0.728562	0.749664
YIL118W	RHO3	-0.04	-0.03	220.3	235.6	214.276	230.751	0.01	0.09687	0.10687	0.160239
YIL121W	QDR2	-0.19	-0.2	30.1	38.9	26.3858	33.8644	-0.01	0.370007	0.360007	-0.110208
YIL123W	SIM1	0.35	0.11	94.7	95.4	120.701	102.958	-0.24	0.0106248	-0.229375	-0.062322
YIL124W	AYR1	0.03	-0.06	185.5	176.7	189.398	169.502	-0.09	-0.0701171	-0.160117	-0.046583
YIL125W	KGD1	0.04	0.12	34.6	34.8	35.5727	37.8184	0.08	0.00831527	0.0883153	-0.072377
YIL126W	STH1	0.26	0.41	31.8	28.9	38.0798	38.399	0.15	-0.137957	0.0120427	-0.100291
YIL127C	RRT14	-0.17	-0.03	149.2	161.9	132.615	158.568	0.14	0.117855	0.257855	-0.302496
YIL128W	MET18	0.27	0.35	26.8	26.8	32.3156	34.1582	0.08	0	0.08	0.231867
YIL129C	TAO3	0.15	0.23	15.1	17.2	16.7545	20.1728	0.08	0.18786	0.26786	-0.067716
YIL130W	ASG1	0.24	0.34	21.2	24.4	25.037	30.8845	0.1	0.202817	0.302817	0.0479
YIL131C	FKH1	0.07	0.3	37.5	34.7	39.3644	42.7207	0.23	-0.111955	0.118045	-0.274718
YIL133C	RPL16A	0.17	0.26	1365.4	1012.6	1536.15	1212.57	0.09	-0.431259	-0.341259	-0.328932
YIL135C	VHS2	0.09	0.03	36.4	38.5	38.7431	39.309	-0.06	0.08092	0.02092	0.115397
YIL136W	OM45	-0.14	-0.12	39.6	36.3	35.9378	33.4028	0.02	-0.125531	-0.105531	-1.33112
YIL137C	TMA108	0.1	0.21	29.8	31.5	31.9388	36.4357	0.11	0.0800395	0.190039	-0.014775
YIL138C	TPM2	-0.04	-0.1	336.3	323.9	327.104	302.209	-0.06	-0.0542003	-0.1142	-0.021614
YIL140W	AXL2	0.17	-0.04	17.1	26.6	19.2385	25.8726	-0.21	0.63743	0.42743	-0.02556
YIL142W	CCT2	0.09	0.11	269.3	246.2	286.635	265.706	0.02	-0.129383	-0.109383	-0.014913
YIL143C	SSL2	0.18	0.2	36.3	37.2	41.1237	42.7316	0.02	0.0353331	0.0553331	0.218196
YIL144W	TID3	0.09	0.2	24	26.5	25.5449	30.4405	0.11	0.142958	0.252958	-0.032042
YIL145C	PAN6	0.23	0.33	80	83	93.8268	104.332	0.1	0.0531113	0.153111	0.201291
YIL147C	SLN1	0.19	0.19	23.6	26.8	26.922	30.5725	0	0.183446	0.183446	0.050744
YIL148W	RPL40A	-0.25	-0.19	4503.4	3592.8	3786.89	3149.47	0.06	-0.325906	-0.265906	-0.06252
YIL149C	MLP2	0.43	0.52	20.5	18.9	27.6183	27.1018	0.09	-0.117238	-0.0272377	-0.138405
YIL150C	MCM10	-0.01	0.15	8.8	8.3	8.73921	9.20943	0.16	-0.0843922	0.0756078	3.55837
YIL151C	YIL151C	0.1	0.14	29.5	30.9	31.6173	34.0489	0.04	0.0668919	0.106892	-0.07159
YIL153W	RRD1	-0.06	0.03	20.8	23.2	19.9527	23.6875	0.09	0.157541	0.247541	0.04213
YIL154C	IMP2'	-0.45	-0.6	64	73.4	46.8507	48.4259	-0.15	0.197708	0.0477082	0.468637
YIL155C	GUT2	0	0.07	14.4	13.7	14.4	14.3811	0.07	-0.0718929	-0.00189292	-0.434667
YIL156W	UBP7	0.08	0.14	11.9	13.2	12.5785	14.5451	0.06	0.149576	0.209576	-0.053716
YIL156W-B	YIL156W-B	-0.16	0	165.8	188.7	148.395	188.7	0.16	0.18665	0.34665	0.34384
YIL159W	BNR1	0.2	0.34	5.9	6.5	6.77732	8.22742	0.14	0.139725	0.279725	0.139288
YIL161W	YIL161W	-0.09	-0.05	68.5	73.8	64.3573	71.2861	0.04	0.107517	0.147517	0.027885
YIL162W	SUC2	0.05	0.18	19.2	18.6	19.8771	21.0716	0.13	-0.0458037	0.0841963	-0.361511
YIL169C	YIL169C	-0.24	-0.28	3.3	2	2.79426	1.64718	-0.04	-0.722466	-0.762466	-2.70313
YIL173W	VTH1	0.19	0.37	6.5	5.8	7.41496	7.49565	0.18	-0.164387	0.0156132	-0.568694
YIL177C	YIL177C	-0.59	-0.23	13.2	11.9	8.76933	10.1464	0.36	-0.149576	0.210424	-1.06323
YIR001C	SGN1	0.14	0.27	40.3	34.6	44.4068	41.721	0.13	-0.220008	-0.0900078	0.005691
YIR002C	MPH1	0.19	0.29	27.5	29.7	31.371	36.3124	0.1	0.111031	0.211031	0.144275
YIR003W	AIM21	0.08	0.11	36.9	45	39.004	48.5653	0.03	0.286304	0.316304	0.229009
YIR004W	DJP1	-0.13	0.11	159.3	153.1	145.573	165.23	0.24	-0.057272	0.182728	0.177281
YIR005W	IST3	-0.22	-0.04	81.6	123.5	70.0589	120.123	0.18	0.59787	0.77787	-0.404276
YIR006C	PAN1	0.26	0.22	21.1	23.9	25.2668	27.8371	-0.04	0.179768	0.139768	0.072207
YIR007W	YIR007W	0.23	0.03	7	6.8	8.20984	6.94288	-0.2	-0.0418202	-0.24182	-0.028359
YIR008C	PRI1	-0.2	0.01	73.7	76.8	64.1596	77.3342	0.21	0.0594417	0.269442	-0.019979
YIR010W	DSN1	0.08	0.15	25.7	29.3	27.1654	32.5104	0.07	0.189132	0.259132	0.275179
YIR012W	SQT1	-0.07	-0.14	209.1	237.4	199.197	215.445	-0.07	0.183127	0.113127	0.228073
YIR017C	MET28	-0.23	-0.13	90.9	223.5	77.5045	204.241	0.1	1.29792	1.39792	0.890954
YIR021W	MRS1	-0.08	-0.06	40.8	42.9	38.5992	41.1524	0.02	0.0724085	0.0924085	0.151799
YIR022W	SEC11	-0.03	-0.13	173.1	176	169.538	160.834	-0.1	0.0239697	-0.0760303	-0.135115
YIR023W	DAL81	0.56	0.24	11.1	15.2	16.3644	17.9511	-0.32	0.453512	0.133512	-0.148938
YIR024C	YIR024C	0.05	0.08	29	32.6	30.0227	34.4588	0.03	0.168819	0.198819	0.106972
YIR026C	YVH1	-0.21	-0.05	70.6	80	61.0363	77.2749	0.16	0.180332	0.340332	0.306112
YIR030C	DCG1	0.03	0.12	18.6	32.8	18.9908	35.6449	0.09	0.818393	0.908393	0.494887
YIR031C	DAL7	-0.05	0.01	52.6	102.5	50.8083	103.213	0.06	0.962489	1.02249	-1.48657
YIR033W	MGA2	0.15	0.13	33.1	35.8	36.7267	39.1757	-0.02	0.113128	0.0931284	0.000598
YIR034C	LYS1	-0.03	0.07	137.6	257.7	134.768	270.512	0.1	0.905212	1.00521	1.33358
YIR035C	YIR035C	-0.24	-0.14	103.6	72.7	87.7228	65.9766	0.1	-0.510997	-0.410997	-0.908888
YIR036C	IRC24	-0.03	-0.12	25.7	20.8	25.1711	19.1399	-0.09	-0.305185	-0.395185	-0.240126
YIR037W	HYR1	0.04	-0.23	61.9	57.6	63.6402	49.1118	-0.27	-0.103871	-0.373871	-0.567931
YIR038C	GTT1	-0.32	-0.14	34	33.6	27.2364	30.4926	0.18	-0.0170735	0.162926	-0.42132
YJL001W	PRE3	-0.1	-0.02	459.5	437.2	428.729	431.181	0.08	-0.0717715	0.00822854	0.011356
YJL002C	OST1	-0.09	-0.15	207.9	205	195.327	184.756	-0.06	-0.0202658	-0.0802658	0.056601
YJL005W	CYR1	0.14	0.25	17	14.4	18.7324	17.1246	0.11	-0.239466	-0.129466	-0.253589
YJL008C	CCT8	0.15	0.26	265.6	255.3	294.702	305.716	0.11	-0.0570616	0.0529384	0.057893
YJL010C	NOP9	0.26	0.39	63.7	68.1	76.2794	89.2378	0.13	0.0963614	0.226361	0.111787
YJL011C	RPC17	-0.23	-0.09	105.2	111.7	89.6972	104.945	0.14	0.0864945	0.226494	0.176756
YJL012C	VTC4	0.37	0.4	327.8	272.4	423.633	359.434	0.03	-0.267089	-0.237089	-0.075252
YJL014W	CCT3	0.02	0.05	315.3	304.4	319.701	315.135	0.03	-0.0507568	-0.0207568	0.064479
YJL016W	YJL016W	0.06	0.02	29	22.1	30.2315	22.4085	-0.04	-0.392007	-0.432007	-1.02273
YJL019W	MPS3	0.29	0.51	10.6	11.6	12.96	16.519	0.22	0.130061	0.350061	0.081529
YJL020C	BBC1	0.09	0.03	28.2	34.5	30.0152	35.2249	-0.06	0.290901	0.230901	0.165531
YJL024C	APS3	0.03	0.1	90.3	91.1	92.1974	97.6386	0.07	0.0127251	0.0827251	-0.051042
YJL026W	RNR2	-0.03	-0.25	305.7	279.6	299.409	235.115	-0.22	-0.128752	-0.348752	-0.288672
YJL029C	VPS53	-0.01	-0.07	30.7	27.1	30.4879	25.8165	-0.06	-0.179946	-0.239946	-0.079419
YJL030W	MAD2	0.04	0.04	88.1	85.1	90.5768	87.4925	0	-0.0499829	-0.0499829	-0.097813
YJL031C	BET4	0.03	0.11	77.8	72.1	79.4347	77.8124	0.08	-0.109771	-0.0297709	0.086605
YJL033W	HCA4	0.1	0.05	54.8	58.4	58.7332	60.4595	-0.05	0.0917925	0.0417925	-0.14403
YJL034W	KAR2	0.25	0.27	585	394.1	695.686	475.209	0.02	-0.569875	-0.549875	-0.484619
YJL035C	TAD2	-0.21	-0.06	53.3	59.5	46.0798	57.0762	0.15	0.158754	0.308754	0.479326
YJL036W	SNX4	-0.02	0.22	69.2	67.2	68.2473	78.2701	0.24	-0.0423108	0.197689	0.133101
YJL039C	NUP192	0.14	0.29	32.7	32.2	36.0323	39.369	0.15	-0.0222299	0.12777	-0.016851
YJL041W	NSP1	0.25	0.15	35.8	44.1	42.5736	48.932	-0.1	0.300819	0.200819	0.041065
YJL042W	MHP1	0.14	0.26	10	11.9	11.0191	14.25	0.12	0.250962	0.370962	0.025613
YJL044C	GYP6	0.39	0.44	57	60.5	74.6924	82.0746	0.05	0.0859732	0.135973	-0.077402
YJL045W	YJL045W	0.1	-0.26	1.7	2.5	1.82201	2.08772	-0.36	0.556393	0.196393	-0.244215
YJL046W	AIM22	-0.05	0.09	51.2	55.2	49.4559	58.7532	0.14	0.108524	0.248524	0.291968
YJL047C	RTT101	0.4	0.34	18.6	19.2	24.5428	24.3025	-0.06	0.0458037	-0.0141963	0.191337
YJL048C	UBX6	-0.06	-0.3	143.9	173.7	138.038	141.088	-0.24	0.271531	0.0315312	0.731434
YJL049W	YJL049W	0.01	0.23	45.2	47.2	45.5144	55.3578	0.22	0.0624641	0.282464	0.143251
YJL050W	MTR4	0.15	0.29	89	91.7	98.7517	112.116	0.14	0.0431164	0.183116	0.038807
YJL051W	IRC8	0	0.1	15.2	13.7	15.2	14.6833	0.1	-0.149895	-0.0498954	0.195198
YJL052W	TDH1	0.29	0.4	57.9	25.8	70.7909	34.0433	0.11	-1.16619	-1.05619	-0.895646
YJL053W	PEP8	0.05	-0.07	71.6	79.2	74.125	75.4489	-0.12	0.145541	0.0255408	0.13739
YJL054W	TIM54	0.28	0.29	73.7	70.8	89.4862	86.5629	0.01	-0.0579153	-0.0479153	0.01356
YJL055W	YJL055W	-0.12	-0.08	308.6	294.9	283.97	278.992	0.04	-0.0655122	-0.0255122	-0.252632
YJL058C	BIT61	0.15	0.08	12.2	15.8	13.5367	16.7009	-0.07	0.373043	0.303043	0.101856
YJL060W	BNA3	-0.09	-0.06	68	159.8	63.8875	153.29	0.03	1.23266	1.26266	1.18903
YJL061W	NUP82	0.11	0.07	62.6	60.6	67.5597	63.6128	-0.04	-0.0468449	-0.0868449	0.213094
YJL063C	MRPL8	-0.05	-0.01	110.8	108.1	107.026	107.353	0.04	-0.0355914	0.00440864	0.113106
YJL066C	MPM1	-0.18	-0.04	42.1	35	37.1618	34.0429	0.14	-0.266465	-0.126465	-0.152439
YJL068C	YJL068C	-0.27	-0.12	93.9	77.8	77.8731	71.5906	0.15	-0.271355	-0.121355	-0.399871
YJL069C	UTP18	0.11	-0.02	70.2	78.7	75.7618	77.6165	-0.13	0.164893	0.0348926	0.049947
YJL070C	YJL070C	0.16	0.27	16.7	16	18.6587	19.2929	0.11	-0.0617762	0.0482238	-0.000583
YJL071W	ARG2	0.02	-0.1	74.4	106.2	75.4386	99.0881	-0.12	0.513409	0.393409	0.391498
YJL073W	JEM1	0.33	0.24	22.4	19.4	28.1571	22.9113	-0.09	-0.207442	-0.297442	-0.680018
YJL074C	SMC3	0.13	0.36	28.5	26.3	31.1874	33.7541	0.23	-0.115899	0.114101	-0.153042
YJL076W	NET1	0.19	0.17	35.1	49	40.0408	55.1279	-0.02	0.481311	0.461311	0.03455
YJL080C	SCP160	0.13	0.11	106.5	88.1	116.542	95.08	-0.02	-0.27364	-0.29364	-0.213888
YJL081C	ARP4	0.05	0.16	99.7	92.1	103.216	102.902	0.11	-0.114392	-0.00439235	-0.059931
YJL082W	IML2	0.27	0.2	20.5	24.5	24.7191	28.1431	-0.07	0.257158	0.187158	-0.20824
YJL083W	TAX4	0.56	0.42	3	3.3	4.42281	4.41516	-0.14	0.137504	-0.00249648	-0.56007
YJL084C	ALY2	0.21	0.26	7.8	11.1	9.02217	13.292	0.05	0.509014	0.559014	0.026151
YJL085W	EXO70	0.26	0.04	41.8	45.8	50.0546	47.0876	-0.22	0.131845	-0.0881553	0.153367
YJL087C	TRL1	0.22	0.31	24.6	26.5	28.6524	32.8523	0.09	0.107334	0.197334	0.019943
YJL088W	ARG3	0.2	0.17	226.7	202.9	260.41	228.274	-0.03	-0.160016	-0.190016	-0.16065
YJL092W	SRS2	0.3	0.37	13.8	16.4	16.9898	21.1946	0.07	0.249028	0.319028	0.00792
YJL094C	KHA1	0.12	0.14	23	17.1	24.9949	18.8426	0.02	-0.427638	-0.407638	-0.328157
YJL095W	BCK1	0.28	0.44	8.1	8.1	9.83498	10.9885	0.16	0	0.16	0.042945
YJL096W	MRPL49	-0.11	0.1	149.4	135.2	138.432	144.904	0.21	-0.144085	0.065915	0.040997
YJL098W	SAP185	0.11	0.34	36.6	37.7	39.4998	47.719	0.23	0.0427209	0.272721	0.032405
YJL099W	CHS6	0.21	0.1	26.7	27.4	30.8836	29.3666	-0.11	0.0373362	-0.0726638	0.033492
YJL100W	LSB6	0.08	-0.08	15.4	23.9	16.2781	22.6108	-0.16	0.63408	0.47408	0.128493
YJL101C	GSH1	0.14	0.15	40.1	40.1	44.1864	44.4937	0.01	0	0.01	-0.291106
YJL102W	MEF2	0.19	0.11	10.7	9.5	12.2062	10.2527	-0.08	-0.171611	-0.251611	0.2605
YJL104W	PAM16	-0.19	-0.08	274.2	251.2	240.365	237.65	0.11	-0.126392	-0.0163921	0.086465
YJL109C	UTP10	0.11	0.21	50.9	58.8	54.9327	68.0133	0.1	0.20815	0.30815	-0.001297
YJL111W	CCT7	0.1	0.29	256.5	228.3	274.91	279.129	0.19	-0.168028	0.021972	0.033485
YJL112W	MDV1	0.07	0.16	55.5	53.1	58.2593	59.3279	0.09	-0.0637759	0.0262241	-0.142072
YJL115W	ASF1	-0.13	0.29	77	51.5	70.365	62.966	0.42	-0.580286	-0.160286	-0.460468
YJL117W	PHO86	-0.12	-0.01	324.7	239.9	298.785	238.243	0.11	-0.436674	-0.326674	-0.203503
YJL121C	RPE1	-0.18	-0.3	126.4	139	111.574	112.903	-0.12	0.137088	0.0170884	-0.120586
YJL122W	ALB1	-0.1	0.01	207.1	211.9	193.231	213.374	0.11	0.033056	0.143056	-0.08154
YJL123C	MTC1	-0.1	-0.03	177.5	143.2	165.613	140.253	0.07	-0.309788	-0.239788	-0.250076
YJL124C	LSM1	0.04	0.1	232.8	193.7	239.345	207.603	0.06	-0.265267	-0.205267	0.154908
YJL125C	GCD14	0.07	0.26	63.4	71.9	66.552	86.0987	0.19	0.181509	0.371509	0.136369
YJL126W	NIT2	0.03	-0.39	40.6	51.7	41.4531	39.4538	-0.42	0.348685	-0.0713154	0.339835
YJL128C	PBS2	0.1	0.1	42.8	41	45.8719	43.9427	0	-0.0619869	-0.0619869	-0.034808
YJL130C	URA2	0.11	-0.02	194.6	116.2	210.018	114.6	-0.13	-0.743902	-0.873902	-1.34506
YJL131C	AIM23	0.12	0.16	31.5	26.4	34.2321	29.4964	0.04	-0.254814	-0.214814	-0.029519
YJL133W	MRS3	0.06	-0.18	50.3	52.8	52.436	46.6067	-0.24	0.0699795	-0.17002	0.145581
YJL136C	RPS21B	-0.05	0.01	3145.6	2247.4	3038.45	2263.03	0.06	-0.485078	-0.425078	-0.34832
YJL138C	TIF2	-0.17	-0.22	308.7	272	274.386	233.53	-0.05	-0.182599	-0.232599	-0.219419
YJL140W	RPB4	-0.13	-0.01	360.5	374.4	329.436	371.814	0.12	0.0545812	0.174581	0.0071
YJL141C	YAK1	0.06	0.1	32.8	31.2	34.1929	33.4393	0.04	-0.0721498	-0.0321498	-0.116659
YJL145W	SFH5	-0.01	0.08	164.8	141.6	163.662	149.674	0.09	-0.218895	-0.128895	-0.023127
YJL146W	IDS2	-0.01	0.15	30.1	29.3	29.8921	32.5104	0.16	-0.0388628	0.121137	0.060481
YJL148W	RPA34	-0.18	-0.06	359.4	342.5	317.243	328.548	0.12	-0.0694864	0.0505136	-0.063711
YJL149W	DAS1	0.33	0.29	13.2	12.8	16.5926	15.6498	-0.04	-0.0443941	-0.0843941	-0.046473
YJL153C	INO1	-0.05	0.03	87	54.8	84.0365	55.9515	0.08	-0.66684	-0.58684	-0.188387
YJL154C	VPS35	0.13	0.18	46	37.5	50.3375	42.4831	0.05	-0.294743	-0.244743	-0.338279
YJL155C	FBP26	-0.06	0.01	50.1	42.5	48.0591	42.7956	0.07	-0.237348	-0.167348	-0.254688
YJL156C	SSY5	0.15	0.31	32.1	31.6	35.6172	39.1748	0.16	-0.0226487	0.137351	-0.032442
YJL158C	CIS3	0.13	0.06	586.1	540.9	641.366	563.87	-0.07	-0.115785	-0.185785	-0.095757
YJL159W	HSP150	0.17	-0.01	456.4	392.1	513.477	389.392	-0.18	-0.219077	-0.399077	-0.767532
YJL162C	JJJ2	0.21	0.15	23	27.9	26.6038	30.957	-0.06	0.278631	0.218631	-1.76586
YJL164C	TPK1	0.11	0.28	36	25.5	38.8522	30.962	0.17	-0.4975	-0.3275	-0.309839
YJL165C	HAL5	0.35	0.45	35.6	32.9	45.3744	44.9427	0.1	-0.11379	-0.0137897	-0.026526
YJL166W	QCR8	-0.11	0.06	498.7	367.4	462.089	383.002	0.17	-0.440821	-0.270821	-0.426787
YJL167W	ERG20	-0.06	-0.16	832.1	658.3	798.204	589.195	-0.1	-0.338012	-0.438012	-0.220247
YJL168C	SET2	0.15	0.24	66.3	64.4	73.5645	76.0559	0.09	-0.0419482	0.0480518	-0.03569
YJL171C	YJL171C	0.12	0.16	140.6	120.6	152.795	134.745	0.04	-0.221367	-0.181367	-0.049274
YJL172W	CPS1	0.09	0.08	73.9	152.1	78.657	160.772	-0.01	1.04137	1.03137	1.18125
YJL173C	RFA3	0.02	0.01	146.7	137.3	148.748	138.255	-0.01	-0.0955372	-0.105537	-0.054514
YJL174W	KRE9	0.11	-0.11	146.8	152.2	158.431	141.027	-0.22	0.0521164	-0.167884	-0.482016
YJL176C	SWI3	0.23	0.32	32.6	32.6	38.2344	40.6956	0.09	0	0.09	0.002237
YJL177W	RPL17B	-0.02	0.05	1579.9	1137	1558.15	1177.1	0.07	-0.474601	-0.404601	-0.302457
YJL178C	ATG27	-0.17	-0.21	146.5	130.9	130.215	113.168	-0.04	-0.162436	-0.202436	-0.161416
YJL179W	PFD1	0.01	0.15	205.5	199.1	206.929	220.915	0.14	-0.0456452	0.0943548	0.086001
YJL180C	ATP12	0	-0.12	79.2	69.9	79.2	64.3211	-0.12	-0.180208	-0.300208	-0.080752
YJL183W	MNN11	0.02	-0.02	173.2	176.2	175.618	173.774	-0.04	0.024775	-0.015225	-0.04088
YJL184W	GON7	-0.16	-0.1	141.2	176.6	126.378	164.774	0.06	0.322745	0.382745	0.292727
YJL186W	MNN5	0.09	-0.1	81.6	87.5	86.8526	81.6404	-0.19	0.100714	-0.0892861	0.13058
YJL190C	RPS22A	-0.28	-0.47	6417.3	4891.8	5285.23	3531.71	-0.19	-0.391601	-0.581601	-0.289911
YJL191W	RPS14B	-0.16	-0.07	292	299.5	261.347	285.315	0.09	0.0365876	0.126588	-0.294106
YJL192C	SOP4	-0.11	-0.08	212.4	173.7	196.807	164.33	0.03	-0.290186	-0.260186	-0.295071
YJL197W	UBP12	0.25	0.33	24.7	24.8	29.3734	31.1739	0.08	0.00582908	0.0858291	-0.119418
YJL198W	PHO90	0.09	-0.05	43.4	54.5	46.1937	52.6435	-0.14	0.328561	0.188561	0.048948
YJL200C	ACO2	0.11	0.16	68.1	114.7	73.4954	128.153	0.05	0.752139	0.802139	0.880834
YJL201W	ECM25	0.16	0.3	22.5	31.5	25.139	38.781	0.14	0.485427	0.625427	0.001932
YJL203W	PRP21	0.02	0.19	44.6	45.8	45.2226	52.247	0.17	0.0383039	0.208304	0.126949
YJL204C	RCY1	0.32	0.47	16.8	17.9	20.972	24.7935	0.15	0.0914984	0.241498	0.158278
YJL206C	YJL206C	-0.35	0.07	10.9	11.7	8.55197	12.2817	0.42	0.10218	0.52218	-0.231066
YJL207C	LAA1	0.07	0.19	22.3	21.6	23.4087	24.6405	0.12	-0.0460124	0.0739876	-0.147881
YJL208C	NUC1	0.09	0.31	78.3	86.6	83.3402	107.359	0.22	0.145355	0.365355	0.150173
YJL212C	OPT1	0.16	0.03	19.6	42.4	21.8988	43.2909	-0.13	1.11321	0.983211	0.692894
YJL217W	REE1	-0.04	-0.09	373	330.5	362.8	310.512	-0.05	-0.174525	-0.224525	0.152593
YJL222W	VTH2	-0.53	-0.13	4.9	4.4	3.39352	4.02086	0.4	-0.155278	0.244722	-0.43037
YJR002W	MPP10	-0.08	0.03	137.8	136.5	130.367	139.368	0.11	-0.0136749	0.0963251	0.047778
YJR003C	YJR003C	-0.17	-0.01	76.6	94.5	68.0853	93.8472	0.16	0.30297	0.46297	0.132663
YJR005W	APL1	0.1	0.09	50	64.1	53.5887	68.2261	-0.01	0.358396	0.348396	0.608993
YJR006W	POL31	0.22	0.15	58	55.8	67.5545	61.914	-0.07	-0.0557878	-0.125788	-0.210691
YJR007W	SUI2	0.12	0.22	200.5	188.1	217.89	219.086	0.1	-0.0921024	0.00789761	-0.035646
[truncated: 3,563 more rows]
