# Supplementary material for: Quantitative proteomic analysis reveals posttranslational responses to aneuploidy in yeast
Source: eLife journal article supplement (doi:10.7554/elife.03023), 2014-07-29
Supplement: supp [file elife-03023-supp-v1.zip › elife_poa_e03023_Figure_4_source_data_1.xlsx]

## Sheet: TMT
Figure 4-Supplemental data 1
Protein	Gene Symbol	Description	pdr5∆/WT 0 s	pdr5∆/WT 90 s	pdr5∆/WT 300 s	Dis II-pdr5∆/WT 0 s	Dis II-pdr5∆/WT 90 s	Dis II-pdr5∆/WT 300 s	Dis V-pdr5∆/WT 0 s	Dis V-pdr5∆/WT 90 s	Dis V-pdr5∆/WT 300 s
YAL001C	TFC3	Largest of six subunits of the RNA polymerase III transcription initiation factor complex (TFIIIC); part of the TauB domain of TFIIIC that binds DNA at the BoxB promoter sites of tRNA and similar genes; cooperates with Tfc6p in DNA binding	0.0655797	-0.11685	-0.055999	-0.0388101	0.061606	0.0494355	0.0846265	-0.0272413	0.0489521
YAL003W	EFB1	Translation elongation factor 1 beta; stimulates nucleotide exchange to regenerate EF-1 alpha-GTP for the next elongation cycle; part of the EF-1 complex, which facilitates binding of aminoacyl-tRNA to the ribosomal A site	0.0816406	0.14848	0.174422	0.370774	0.201832	0.239674	0.0074775	-0.0273159	-0.0466446
YAL005C	SSA1	ATPase involved in protein folding and nuclear localization signal (NLS)-directed nuclear transport; member of heat shock protein 70 (HSP70) family; forms a chaperone complex with Ydj1p; localized to the nucleus, cytoplasm, and cell wall	0.192559	0.275573	0.271228	0.421734	0.507123	0.502014	-0.104114	-0.0491311	-0.171684
YAL007C	ERP2	Protein that forms a heterotrimeric complex with Erp1p, Emp24p, and Erv25p; member, along with Emp24p and Erv25p, of the p24 family involved in ER to Golgi transport and localized to COPII-coated vesicles	0.0008083	0.112528	0.0711566	0.0966249	0.0752978	0.149703	-0.01865	0.0069348	0.00780039
YAL008W	FUN14	Mitochondrial protein of unknown function	0.225757	-0.170112	0.0868351	-0.0318051	0.322998	-0.0190664	-0.338054	-0.31803	-0.864835
YAL010C	MDM10	Subunit of both the ERMES complex that links the ER to mitochondria, and of the mitochondrial sorting and assembly machinery (SAM complex) that functions in import and assembly of outer membrane beta-barrel proteins	-0.0684959	-0.0118539	0.31163	-0.0149751	-0.067887	-0.0372965	-0.010798	-0.147579	-0.0761737
YAL012W	CYS3	Cystathionine gamma-lyase, catalyzes one of the two reactions involved in the transsulfuration pathway that yields cysteine from homocysteine with the intermediary formation of cystathionine	-0.0731569	-0.0892093	-0.140894	-0.185154	-0.170036	-0.126032	0.119229	0.062481	0.147759
YAL013W	DEP1	Transcriptional modulator involved in regulation of structural phospholipid biosynthesis genes and metabolically unrelated genes, as well as maintenance of telomeres, mating efficiency, and sporulation	-0.0713919	-0.00170022	-0.039844	-0.0586731	-0.116573	-0.0810262	0.0645665	0.0475496	0.116425
YAL014C	SYN8	Endosomal SNARE related to mammalian syntaxin 8	-0.10019	0.0218441	-0.138885	0.166712	0.207654	0.129668	0.192554	0.242631	0.425697
YAL015C	NTG1	DNA N-glycosylase and apurinic/apyrimidinic (AP) lyase involved in base excision repair; acts in both nucleus and mitochondrion; creates a double-strand break at mtDNA origins that stimulates replication in response to oxidative stress	0.0216789	0.020069	0.0102817	0.280367	0.114666	-0.0969903	0.102629	0.0431696	0.0739846
YAL016W	TPD3	Regulatory subunit A of the heterotrimeric protein phosphatase 2A (PP2A), which also contains regulatory subunit Cdc55p and either catalytic subunit Pph21p or Pph22p; required for cell morphogenesis and transcription by RNA polymerase III	0.0330331	0.0110074	-0.070281	0.131526	0.0943342	0.0425418	0.0536565	0.115351	0.126548
YAL017W	PSK1	One of two (see also PSK2) PAS domain containing S/T protein kinases; coordinately regulates protein synthesis and carbohydrate metabolism and storage in response to a unknown metabolite that reflects nutritional status	-0.034418	-0.15867	-0.093271	0.132824	0.149975	0.128532	-0.0901882	-0.192373	-0.230768
YAL019W	FUN30	Conserved member of the Snf2p family with ATP-dependent chromatin remodeling activity; has a role in silencing; potential Cdc28p substrate; authentic, non-tagged protein is detected in purified mitochondria in high-throughput studies	0.18725	0.078101	0.0592331	0.189644	0.253015	0.172301	0.0771735	0.0595469	0.0465539
YAL020C	ATS1	Protein required, with Elongator complex, Kti11p, and Kti12p, for modification of wobble nucleosides in tRNA; has a potential role in regulatory interactions between microtubules and the cell cycle	-0.177925	-0.210952	-0.210881	-0.103692	-0.158895	-0.339296	0.386845	0.490185	0.47614
YAL021C	CCR4	Component of the CCR4-NOT transcriptional complex, which is involved in regulation of gene expression; component of the major cytoplasmic deadenylase, which is involved in mRNA poly(A) tail shortening	0.0776948	-0.016168	0.102308	0.275991	0.296575	0.216804	-0.120643	-0.0923472	-0.0171213
YAL022C	FUN26	Nucleoside transporter with broad nucleoside selectivity; localized to intracellular membranes	0.0532599	0.131999	0.0545016	0.292167	0.0135547	-0.0594943	0.13426	0.135458	0.0251667
YAL023C	PMT2	Protein O-mannosyltransferase, transfers mannose residues from dolichyl phosphate-D-mannose to protein Ser/Thr residues; involved in ER quality control; acts in a complex with Pmt1p, can instead interact with Pmt5; target for new antifungal	0.118448	0.0716377	0.090104	0.0528021	-0.056862	0.0196438	-0.155293	-0.0580845	-0.124835
YAL024C	LTE1	Protein similar to GDP/GTP exchange factors but without detectable GEF activity; required for asymmetric localization of Bfa1p at daughter-directed spindle pole bodies and for mitotic exit at low temperatures	0.253582	-0.00448412	0.0213823	0.382858	0.137009	0.248823	0.104409	0.170135	0.256103
YAL025C	MAK16	Essential nuclear protein, constituent of 66S pre-ribosomal particles; required for maturation of 25S and 5.8S rRNAs; required for maintenance of M1 satellite double-stranded RNA of the L-A virus	0.10068	0.151343	0.134375	-0.0701161	-0.131842	0.0365258	-0.0533036	-0.0395296	-0.0638893
YAL026C	DRS2	Aminophospholipid translocase (flippase) that maintains membrane lipid asymmetry in post-Golgi secretory vesicles; contributes to clathrin-coated vesicle formation and endocytosis; mutations in human homolog ATP8B1 result in liver disease	0.348609	0.225833	0.118712	0.268735	0.442999	0.24001	0.490156	0.44599	0.496668
YAL029C	MYO4	One of two type V myosin motors (along with MYO2) involved in actin-based transport of cargos; required for mRNA transport, including ASH1 mRNA, and facilitating the growth and movement of ER tubules into the growing bud along with She3p	0.164927	0.0740306	0.0833402	0.231036	0.248423	0.155376	0.141066	0.181471	0.129242
YAL030W	SNC1	Vesicle membrane receptor protein (v-SNARE) involved in the fusion between Golgi-derived secretory vesicles with the plasma membrane; proposed to be involved in endocytosis; member of the synaptobrevin/VAMP family of R-type v-SNARE proteins	-0.0964209	-0.137761	-0.13755	-0.0756641	-0.129232	-0.0467241	-0.155381	-0.28586	-0.350681
YAL031C	GIP4	Cytoplasmic Glc7-interacting protein whose overexpression relocalizes Glc7p from the nucleus and prevents chromosome segregation; potential Cdc28p substrate	0.19109	0.357823	-0.472086	-0.237831	0.444542	0.396037	-0.020077	-0.0759111	-0.0892432
YAL032C	PRP45	Protein required for pre-mRNA splicing; associates with the spliceosome and interacts with splicing factors Prp22p and Prp46p; orthologous to human transcriptional coactivator SKIP and can activate transcription of a reporter gene	-0.172833	-0.107553	-0.11988	-0.0944031	-0.116919	-0.0118726	-0.112975	0.0402483	-0.0009785
YAL033W	POP5	Subunit of both RNase MRP, which cleaves pre-rRNA, and nuclear RNase P, which cleaves tRNA precursors to generate mature 5' ends	0.0315834	0.113639	0.007462	-0.116573	0.152631	-0.0318334	0.518711	0.367106	0.639307
YAL034W-A	MTW1	Essential component of the MIND kinetochore complex (Mtw1p Including Nnf1p-Nsl1p-Dsn1p) which joins kinetochore subunits contacting DNA to those contacting microtubules; critical to kinetochore assembly	-0.106511	-0.107222	-0.004838	-0.0580081	-0.167517	-0.188441	0.13766	0.0866477	0.0546251
YAL035W	FUN12	GTPase, required for general translation initiation by promoting Met-tRNAiMet binding to ribosomes and ribosomal subunit joining; homolog of bacterial IF2	0.139208	0.0982339	0.0426589	0.184788	0.187844	0.242007	0.0974955	0.0864217	0.111494
YAL036C	RBG1	Member of the DRG family of GTP-binding proteins; associates with translating ribosomes; interacts with Tma46p, Ygr250cp, Gir2p and Yap1p via two-hybrid	0.0131286	0.100372	0.0637535	-0.0679941	-0.09556	-0.0796723	0.130679	0.148604	0.110565
YAL038W	CDC19	Pyruvate kinase, functions as a homotetramer in glycolysis to convert phosphoenolpyruvate to pyruvate, the input for aerobic (TCA cycle) or anaerobic (glucose fermentation) respiration	0.0365049	0.0447964	0.0212634	0.0260448	0.0274463	0.0626045	-0.254539	-0.258598	-0.257588
YAL039C	CYC3	Cytochrome c heme lyase (holocytochrome c synthase), attaches heme to apo-cytochrome c (Cyc1p or Cyc7p) in the mitochondrial intermembrane space; human ortholog may have a role in microphthalmia with linear skin defects (MLS)	-0.207522	-0.0751302	-0.116285	-0.0938191	-0.106334	-0.0543677	-0.28828	-0.339051	-0.408806
YAL041W	CDC24	Guanine nucleotide exchange factor (GEF or GDP-release factor) for Cdc42p; required for polarity establishment and maintenance, and mutants have morphological defects in bud formation and shmooing	0.0123469	0.0132946	0.0284315	0.0425441	0.0557811	0.0671681	0.104853	0.169804	0.177727
YAL042W	ERV46	Protein localized to COPII-coated vesicles, forms a complex with Erv41p; involved in the membrane fusion stage of transport	-0.0472276	-0.0464469	0.0163861	0.0464446	-0.0123998	0.0311033	0.124494	0.19077	0.174075
YAL043C	PTA1	Subunit of holo-CPF, a multiprotein complex and functional homolog of mammalian CPSF, required for the cleavage and polyadenylation of mRNA and snoRNA 3' ends; involved in pre-tRNA processing; binds to the phosphorylated CTD of RNAPII	-0.023055	-0.0588602	-0.045265	0.0982647	0.0849616	0.0404098	0.0694625	0.0703167	0.016531
YAL044C	GCV3	H subunit of the mitochondrial glycine decarboxylase complex, required for the catabolism of glycine to 5,10-methylene-THF; also required for all protein lipoylation; expression is regulated by levels of 5,10-methylene-THF	0.0472083	0.0368631	0.0621955	-0.921727	-0.886547	-0.802279	0.248413	0.121841	0.382417
YAL044W-A	YAL044W-A	Putative protein of unknown function; similar to S. pombe uvi31 which is a putative DNA repair protein	-0.0871329	-0.0240041	-0.093087	-0.349228	-0.315414	-0.215079	-0.431742	-0.492346	-0.447876
YAL046C	AIM1	Protein involved in mitochondrial function or organization; null mutant displays elevated frequency of mitochondrial genome loss	-0.0761139	-0.0330698	-0.122387	-0.0838641	-0.225567	-0.0105172	-0.267558	-0.31393	-0.263873
YAL047C	SPC72	Component of the cytoplasmic Tub4p (gamma-tubulin) complex, binds spindle pole bodies and links them to microtubules; has roles in astral microtubule formation and stabilization	-0.0658469	-0.00509202	-0.048252	-0.116493	-0.019537	-0.0503183	0.0743645	0.118836	0.120347
YAL048C	GEM1	Evolutionarily-conserved tail-anchored outer mitochondrial membrane GTPase which regulates mitochondrial morphology; cells lacking Gem1p contain collapsed, globular, or grape-like mitochondria; not required for pheromone-induced cell death	0.0540393	-0.00242967	-0.07716	0.173172	0.11058	0.0651602	-0.105358	-0.138337	-0.156805
YAL049C	AIM2	Cytoplasmic protein involved in mitochondrial function or organization; null mutant displays reduced frequency of mitochondrial genome loss; potential Hsp82p interactor	0.10008	-0.0559229	0.0536603	-0.0655661	0.0293427	-0.0112859	-0.292853	-0.485855	-0.302116
YAL053W	FLC2	Putative FAD transporter; required for uptake of FAD into endoplasmic reticulum; involved in cell wall maintenance	0.0275184	-0.0418886	-0.060932	-0.0220981	-0.0044312	-0.136693	-0.0679004	-0.034962	-0.0118097
YAL055W	PEX22	Putative peroxisomal membrane protein required for import of peroxisomal proteins, functionally complements a Pichia pastoris pex22 mutation	0.0327105	-0.0561533	0.0343486	-0.254082	-0.179219	-0.179062	-0.169379	-0.0243364	-0.217666
YAL058W	CNE1	Calnexin; integral membrane ER chaperone involved in folding and quality control of glycoproteins; chaperone activity is inhibited by Mpd1p, with which Cne1p interacts; 24% identical to mammalian calnexin; Ca+ binding not yet shown in yeast	-0.0275637	-0.0218192	0.007329	-0.0461661	-0.119747	-0.116165	-0.172966	-0.205292	-0.273859
YAL059W	ECM1	Pre-ribosomal factor involved in 60S ribosomal protein subunit export; associates with the pre-60S particle; shuttles between the nucleus and cytoplasm	0.154892	0.181271	0.118402	-0.0923381	-0.023872	0.0467406	-0.356577	-0.276943	-0.326942
YAL060W	BDH1	NAD-dependent (R,R)-butanediol dehydrogenase, catalyzes oxidation of (R,R)-2,3-butanediol to (3R)-acetoin, oxidation of meso-butanediol to (3S)-acetoin, and reduction of acetoin; enhances use of 2,3-butanediol as an aerobic carbon source	-0.483714	-0.454689	-0.454172	-0.780383	-0.968484	-0.870897	-0.185328	-0.161933	-0.156839
YAL062W	GDH3	NADP(+)-dependent glutamate dehydrogenase, synthesizes glutamate from ammonia and alpha-ketoglutarate; rate of alpha-ketoglutarate utilization differs from Gdh1p; expression regulated by nitrogen and carbon sources	-0.0436188	-0.0275283	-0.009584	-0.0261461	-0.086577	-0.161127	0.425791	0.544584	0.522954
YAR002C-A	ERP1	Protein that forms a heterotrimeric complex with Erp2p, Emp24p, and Erv25p; member, along with Emp24p and Erv25p, of the p24 family involved in ER to Golgi transport and localized to COPII-coated vesicles	0.0294424	0.125489	0.12474	0.140731	-0.0059072	0.0704435	-0.0039565	0.0127385	-0.0455382
YAR002W	NUP60	Subunit of the nuclear pore complex (NPC), functions to anchor Nup2p to the NPC in a process controlled by the nucleoplasmic concentration of Gsp1p-GTP; involved in nuclear export and cytoplasmic localization of specific mRNAs such as ASH1	-0.0526793	-0.0383561	-0.025015	-0.187452	-0.126325	-0.161812	-0.130695	-0.0809398	-0.117385
YAR003W	SWD1	Subunit of the COMPASS (Set1C) complex, which methylates histone H3 on lysine 4 and is required in transcriptional silencing near telomeres; WD40 beta propeller superfamily member with similarity to mammalian Rbbp7	-0.0858609	-0.0972631	-0.210099	0.0782696	0.213281	0.451533	0.0524175	0.0097831	0.0152252
YAR007C	RFA1	Subunit of heterotrimeric Replication Protein A (RPA), which is a highly conserved single-stranded DNA binding protein involved in DNA replication, repair, and recombination	0.034477	0.0879004	0.003795	0.146048	0.0964023	0.117954	-0.191443	-0.161994	-0.206429
YAR008W	SEN34	Subunit of the tRNA splicing endonuclease, which is composed of Sen2p, Sen15p, Sen34p, and Sen54p; Sen34p contains the active site for tRNA 3' splice site cleavage and has similarity to Sen2p and to Archaeal tRNA splicing endonuclease	0.0374315	0.0164757	-0.000259	-0.139699	0.130185	0.0480522	0.0990155	0.0292342	0.0579568
YAR014C	BUD14	Protein involved in bud-site selection, Bud14p-Glc7p complex is a cortical regulator of dynein; inhibitor of the actin assembly factor Bnr1p (formin); diploid mutants display a random budding pattern instead of the wild-type bipolar pattern	0.0493914	-0.0426552	0.0841532	0.0688495	0.0032581	0.036159	0.0986825	0.125821	0.0854824
YAR018C	KIN3	Nonessential protein kinase with unknown cellular role	0.0724879	-0.0303708	0.187663	0.262087	0.237791	0.262685	0.184091	0.191064	0.213109
YAR027W	UIP3	Putative integral membrane protein of unknown function; interacts with Ulp1p at the nuclear periphery; member of DUP240 gene family	0.179468	0.088196	0.0562489	0.0677729	0.179266	0.0643761	0.345097	0.474446	0.339259
YAR042W	SWH1	Protein similar to mammalian oxysterol-binding protein; contains ankyrin repeats; localizes to the Golgi and the nucleus-vacuole junction	0.10079	0.00268246	0.0951272	-0.0130091	-0.06125	-0.0918603	0.0750295	0.0949387	0.0531033
YBL002W	HTB2	Histone H2B, core histone protein required for chromatin assembly and chromosome function; nearly identical to HTB1; Rad6p-Bre1p-Lge1p mediated ubiquitination regulates transcriptional activation, meiotic DSB formation and H3 methylation	0.0347494	0.0372898	-0.04406	0.262019	0.0343255	0.182492	0.406585	0.357188	0.452816
YBL004W	UTP20	Component of the small-subunit (SSU) processome, which is involved in the biogenesis of the 18S rRNA	0.202489	0.0571023	0.0758431	1.13318	1.05057	1.01493	0.167167	0.236309	0.130441
YBL007C	SLA1	Cytoskeletal protein binding protein required for assembly of the cortical actin cytoskeleton; interacts with proteins regulating actin dynamics and proteins required for endocytosis; found in the nucleus and cell cortex; has 3 SH3 domains	0.161129	0.156019	0.0928975	1.10025	1.10167	1.18492	0.369263	0.460483	0.405302
YBL008W	HIR1	Subunit of the HIR complex, a nucleosome assembly complex involved in regulation of histone gene transcription; contributes to nucleosome formation, heterochromatic gene silencing, and formation of functional kinetochores	0.314711	0.108082	0.0671986	0.452221	0.794554	0.754352	0.199834	0.0601254	0.132879
YBL010C	YBL010C	Putative protein of unknown function; green fluorescent protein (GFP)-fusion protein colocalizes with clathrin-coated vesicles	-0.0942609	-0.191517	-0.06833	0.541268	0.43749	0.560705	-0.0505038	0.111698	-0.0140517
YBL011W	SCT1	Glycerol 3-phosphate/dihydroxyacetone phosphate dual substrate-specific sn-1 acyltransferase of the glycerolipid biosynthesis pathway, prefers 16-carbon fatty acids, similar to Gpt2p, gene is constitutively transcribed	0.0831748	-0.1298	-0.165269	0.941733	0.796734	0.904996	0.248952	0.231283	0.246721
YBL013W	FMT1	Methionyl-tRNA formyltransferase, catalyzes the formylation of initiator Met-tRNA in mitochondria; potential Cdc28p substrate	0.202063	0.0456266	0.161539	0.685641	0.699472	0.661689	0.260447	0.0217017	0.0417809
YBL015W	ACH1	Protein with CoA transferase activity, particularly for CoASH transfer from succinyl-CoA to acetate; has minor acetyl-CoA-hydrolase activity; phosphorylated; required for acetate utilization and for diploid pseudohyphal growth	-0.0560537	-0.00402881	-0.015811	0.917989	0.807837	0.965336	-0.737362	-0.686972	-0.782748
YBL016W	FUS3	Mitogen-activated serine/threonine protein kinase involved in mating; phosphoactivated by Ste7p; substrates include Ste12p, Far1p, Bni1p, Sst2p; inhibits invasive growth during mating by phosphorylating Tec1p, promoting its degradation	-0.017775	-0.0237063	-0.006731	0.601717	0.412234	0.538195	-0.0147719	-0.0424244	-0.0474152
YBL017C	PEP1	Type I transmembrane sorting receptor for multiple vacuolar hydrolases; cycles between the late-Golgi and prevacuolar endosome-like compartments	0.115951	0.0760314	0.0569874	0.878275	0.832544	0.851398	-0.118517	-0.117856	-0.18013
YBL018C	POP8	Subunit of both RNase MRP, which cleaves pre-rRNA, and nuclear RNase P, which cleaves tRNA precursors to generate mature 5' ends	0.0269701	-0.0899473	0.0255467	0.511863	0.44022	0.372351	0.194861	0.184857	0.353259
YBL022C	PIM1	ATP-dependent Lon protease, involved in degradation of misfolded proteins in mitochondria; required for biogenesis and maintenance of mitochondria	0.0727747	0.0629934	0.0594196	1.28794	1.23901	1.40247	-0.213303	-0.117859	-0.191368
YBL023C	MCM2	Protein involved in DNA replication; component of the Mcm2-7 hexameric complex that binds chromatin as a part of the pre-replicative complex	0.0268513	-0.0470637	0.0986897	0.783212	0.784207	0.769265	0.0904295	0.151995	0.0809145
YBL024W	NCL1	S-adenosyl-L-methionine-dependent tRNA: m5C-methyltransferase, methylates cytosine to m5C at several positions in tRNAs and intron-containing pre-tRNAs; similar to Nop2p and human proliferation associated nucleolar protein p120	0.0951196	0.115467	0.102512	1.04661	0.949926	1.07077	-0.0753629	-0.100059	-0.136451
YBL025W	RRN10	Protein involved in promoting high level transcription of rDNA, subunit of UAF (upstream activation factor) for RNA polymerase I	-0.0128933	0.0868741	-0.153662	0.110953	0.229792	0.439334	0.365344	0.33656	0.267676
YBL026W	LSM2	Lsm (Like Sm) protein; part of heteroheptameric complexes (Lsm2p-7p and either Lsm1p or 8p): cytoplasmic Lsm1p complex involved in mRNA decay; nuclear Lsm8p complex part of U6 snRNP and possibly involved in processing tRNA, snoRNA, and rRNA	0.117747	0.0875639	0.186052	0.442781	0.448969	0.331871	0.434856	0.304312	0.435248
YBL028C	YBL028C	Protein of unknown function that may interact with ribosomes; green fluorescent protein (GFP)-fusion protein localizes to the nucleolus; predicted to be involved in ribosome biogenesis	0.130466	0.261301	0.143429	0.335167	0.254156	0.341627	-0.176422	-0.0392344	-0.109808
YBL029C-A	YBL029C-A	Protein of unknown function; green fluorescent protein (GFP)-fusion protein localizes to the cell periphery; has potential orthologs in Saccharomyces species and in Yarrowia lipolytica	0.513301	0.130332	0.167417	0.897873	1.02312	1.1193	0.469751	0.306869	-0.0263922
YBL030C	PET9	Major ADP/ATP carrier of the mitochondrial inner membrane, exchanges cytosolic ADP for mitochondrially synthesized ATP; also imports heme and ATP; phosphorylated; required for viability in many lab strains that carry a sal1 mutation	-0.106891	-0.0953631	-0.111019	0.629085	0.581602	0.673601	-0.443462	-0.49354	-0.502258
YBL032W	HEK2	RNA binding protein involved in the asymmetric localization of ASH1 mRNA; represses translation of ASH1 mRNA, an effect reversed by Yck1p-dependent phosphoryation; regulates telomere position effect and length; similarity to hnRNP-K	-0.0242201	0.0387994	0.0578317	1.04214	0.969443	1.09849	0.252858	0.2483	0.207374
YBL033C	RIB1	GTP cyclohydrolase II; catalyzes the first step of the riboflavin biosynthesis pathway	-0.0649019	0.0197479	0.0627838	1.08649	1.00846	1.0739	0.143662	0.0921057	0.106892
YBL034C	STU1	Component of the mitotic spindle that binds to interpolar microtubules via its association with beta-tubulin (Tub2p); required for interpolar microtubules to provide an outward force on the spindle poles	-0.0368115	-0.251469	-0.020216	0.408147	0.533069	0.663835	-0.129463	0.104866	-0.117514
YBL035C	POL12	B subunit of DNA polymerase alpha-primase complex, required for initiation of DNA replication during mitotic and premeiotic DNA synthesis; also functions in telomere capping and length regulation	0.00972	-0.0784463	-0.005519	0.731179	0.680777	0.744786	-0.169223	-0.167922	-0.116883
YBL036C	YBL036C	Putative non-specific single-domain racemase based on structural similarity; binds pyridoxal 5'-phosphate; expression of GFP-fusion protein induced in response to the DNA-damaging agent MMS	-0.0600099	-0.0230373	-0.006386	0.998986	0.882263	1.09094	0.213997	0.152893	0.155494
YBL037W	APL3	Alpha-adaptin, large subunit of the clathrin associated protein complex (AP-2); involved in vesicle mediated transport	-0.161893	0.0338304	0.203456	1.56252	1.39674	1.42308	0.520935	0.403056	0.412589
YBL038W	MRPL16	Mitochondrial ribosomal protein of the large subunit	-0.0017422	-0.0265067	0.130364	0.259328	0.286899	0.378566	-0.0055115	-0.0283497	0.00664805
YBL039C	URA7	Major CTP synthase isozyme (see also URA8), catalyzes the ATP-dependent transfer of the amide nitrogen from glutamine to UTP, forming CTP, the final step in de novo biosynthesis of pyrimidines; involved in phospholipid biosynthesis	0.105281	0.154054	0.116728	1.00683	0.872818	0.994635	-0.214029	-0.222989	-0.291196
YBL041W	PRE7	Beta 6 subunit of the 20S proteasome	0.0438051	0.00460932	0.0448609	0.80535	0.811462	0.887356	0.0742035	0.120831	0.0490593
YBL042C	FUI1	High affinity uridine permease, localizes to the plasma membrane; also mediates low but significant transport of the cytotoxic nucleoside analog 5-fluorouridine; not involved in uracil transport	-0.0562371	0.14232	0.0438303	0.387745	0.217211	0.397836	-0.199341	-0.272726	-0.0993812
YBL045C	COR1	Core subunit of the ubiquinol-cytochrome c reductase complex (bc1 complex), which is a component of the mitochondrial inner membrane electron transport chain	-0.206668	-0.198529	-0.215211	0.606293	0.502129	0.585842	-0.536417	-0.565416	-0.54974
YBL046W	PSY4	Putative regulatory subunit of an evolutionarily conserved protein phosphatase; localization is cell-cycle dependent and regulated by Cdc28p phosphorylation; required for cisplatin resistance; homolog of mammalian R2	0.0411034	0.00761672	-0.13788	0.615185	0.561244	0.607599	0.150762	0.19004	0.159721
YBL047C	EDE1	Key endocytic protein involved in a network of interactions with other endocytic proteins, binds membranes in a ubiquitin-dependent manner, may also bind ubiquitinated membrane-associated proteins	0.186889	0.156077	0.143337	1.29937	1.2629	1.38081	0.341657	0.392028	0.352621
YBL050W	SEC17	Peripheral membrane protein required for vesicular transport between ER and Golgi, the 'priming' step in homotypic vacuole fusion, and autophagy; stimulates the ATPase activity of Sec18p; has similarity to mammalian alpha-SNAP	-0.0006329	-0.00264862	0.0620423	1.03733	0.895132	0.998127	0.0611895	0.0048285	-0.107259
YBL051C	PIN4	Protein involved in G2/M phase progression and response to DNA damage, interacts with Rad53p; contains an RNA recognition motif, a nuclear localization signal, and several SQ/TQ cluster domains; hyperphosphorylated in response to DNA damage	-0.0686539	-0.03481	-0.118203	0.475482	0.707525	0.744814	0.0682785	-0.0365086	-0.0113954
YBL054W	TOD6	PAC motif binding protein involved in rRNA and ribosome biogenesis; subunit of the RPD3L histone deacetylase complex; Myb-like HTH transcription factor, similar to Dot6p; hypophosphorylated by rapamycin treatment in a Sch9p-dependent manne	0.308113	0.282762	0.312842	0.789421	0.839285	0.886447	-0.0047505	0.0809867	0.0237247
YBL055C	YBL055C	3'-->5' exonuclease and endonuclease with a possible role in apoptosis; has similarity to mammalian and C. elegans apoptotic nucleases	0.0521048	0.0464521	0.114308	0.955711	0.940247	0.946716	0.320759	0.278981	0.275522
YBL056W	PTC3	Type 2C protein phosphatase (PP2C); dephosphorylates Hog1p (see also Ptc2p) to limit maximal kinase activity induced by osmotic stress; dephosphorylates T169 phosphorylated Cdc28p (see also Ptc2p); role in DNA checkpoint inactivation	-0.0691789	-0.0707565	-0.020769	0.574401	0.752202	0.676198	0.330615	0.285747	0.274679
YBL057C	PTH2	One of two (see also PTH1) mitochondrially-localized peptidyl-tRNA hydrolases; negatively regulates the ubiquitin-proteasome pathway via interactions with ubiquitin-like ubiquitin-associated proteins; dispensable for cell growth	-0.0428083	-0.035907	-0.060942	0.989675	0.898248	0.956779	0.309663	0.236191	0.172145
YBL058W	SHP1	UBX (ubiquitin regulatory X) domain-containing protein that regulates Glc7p phosphatase activity and interacts with Cdc48p; interacts with ubiquitylated proteins in vivo and is required for degradation of a ubiquitylated model substrate	0.067179	0.150665	0.109029	1.27058	1.21394	1.35569	0.0116995	0.0090957	-0.0184809
YBL059C-A	YBL059C-A	Protein of the mitochondrial intermembrane space with a role in respiratory chain complex assembly or maintenance; contains twin Cx9C motifs that can form coiled coil-helix-coiled-coil helix fold	-0.157483	-0.0646524	-0.115145	1.24342	1.02857	1.22963	-0.212215	-0.147134	-0.260257
YBL060W	YEL1	Guanine nucleotide exchange factor specific for Arf3p; localized to the bud neck and tip; required for localization of Arf3p to the bud neck and tip	-0.135191	0.144967	-0.047356	0.88261	1.01063	1.08585	0.120475	0.212507	0.116141
YBL061C	SKT5	Activator of Chs3p (chitin synthase III), recruits Chs3p to the bud neck via interaction with Bni4p; has similarity to Shc1p, which activates Chs3p during sporulation	0.0554383	0.0744888	0.141674	1.01725	0.976332	1.02853	-0.0673211	0.0275291	-0.032359
YBL063W	KIP1	Kinesin-related motor protein required for mitotic spindle assembly, chromosome segregation, and 2 micron plasmid partitioning; functionally redundant with Cin8p for chromosomal but not plasmid functions	-0.380643	-0.428177	-0.088478	1.08891	0.783085	1.00766	-0.178926	0.0182521	-0.012648
YBL064C	PRX1	Mitochondrial peroxiredoxin (1-Cys Prx) with thioredoxin peroxidase activity, has a role in reduction of hydroperoxides; reactivation requires Trr2p and glutathione; induced during respiratory growth and oxidative stress; phosphorylated	0.066379	0.0842348	-0.010333	1.06274	1.19103	1.28714	-0.636212	-0.641366	-0.746379
YBL066C	SEF1	Putative transcription factor, has homolog in Kluyveromyces lactis	0.514165	0.339561	0.470502	0.764569	0.601043	0.709418	0.454561	0.309565	0.28283
YBL067C	UBP13	Putative ubiquitin carboxyl-terminal hydrolase, ubiquitin-specific protease that cleaves ubiquitin-protein fusions	0.20188	0.078842	0.143736	1.25478	1.08234	1.18188	0.336417	0.346368	0.261417
YBL068W	PRS4	5-phospho-ribosyl-1(alpha)-pyrophosphate synthetase, synthesizes PRPP, which is required for nucleotide, histidine, and tryptophan biosynthesis; one of five related enzymes, which are active as heteromultimeric complexes	-0.0383482	0.0631359	0.102905	0.7085	0.598707	0.717858	0.0161815	0.0218558	-0.0444805
YBL069W	AST1	Peripheral membrane protein that interacts with the plasma membrane ATPase Pma1p and has a role in its targeting to the plasma membrane, possibly by influencing its incorporation into lipid rafts	-0.150813	-0.184973	-0.064413	0.731414	0.729805	0.833059	0.0078425	-0.0629023	-0.137874
YBL074C	AAR2	Component of the U5 snRNP, required for splicing of U3 precursors; originally described as a splicing factor specifically required for splicing pre-mRNA of the MATa1 cistron	0.0128943	-0.00460242	0.0369822	1.07697	1.10848	1.16831	0.0956225	0.139054	0.179783
YBL075C	SSA3	ATPase involved in protein folding and the response to stress; plays a role in SRP-dependent cotranslational protein-membrane targeting and translocation; member of the heat shock protein 70 (HSP70) family; localized to the cytoplasm	1.59755	1.46258	1.44979	1.39356	1.44343	1.44769	-0.172608	-0.140139	-0.174977
YBL076C	ILS1	Cytoplasmic isoleucine-tRNA synthetase, target of the G1-specific inhibitor reveromycin A	0.0021986	0.0401087	-0.012927	0.852165	0.743728	0.867093	-0.174454	-0.147028	-0.187836
YBL078C	ATG8	Component of autophagosomes and Cvt vesicles; undergoes conjugation to phosphatidylethanolamine (PE); Atg8p-PE is anchored to membranes, is involved in phagophore expansion, and may mediate membrane fusion during autophagosome formation	0.159039	0.0899552	0.0393666	1.21935	1.17427	1.32969	0.330385	0.353248	0.31952
YBL079W	NUP170	Subunit of the nuclear pore complex (NPC), required for NPC localization of specific nucleoporins; involved in nuclear envelope permeability and chromosome segregation; has similar to Nup157p; essential role, with Nup157p, in NPC assembly	0.11004	0.000540425	-0.010828	1.03024	0.911718	0.927927	0.125239	0.158696	0.176963
YBL080C	PET112	Subunit of the trimeric GatFAB AmidoTransferase(AdT) complex; involved in the formation of Q-tRNAQ; mutation is functionally complemented by the bacterial GatB ortholog	0.175627	-0.0326424	0.088992	0.223023	0.210568	0.302683	-0.173202	-0.0020186	0.0844795
YBL081W	YBL081W	Non-essential protein of unknown function; null mutation results in a decrease in plasma membrane electron transport	-0.0288437	0.0408463	0.0188809	0.697204	0.562264	0.508948	-0.0854244	-0.0472134	-0.0628665
YBL082C	ALG3	Dolichol-P-Man dependent alpha(1-3) mannosyltransferase, involved in the synthesis of dolichol-linked oligosaccharide donor for N-linked glycosylation of proteins	0.250731	0.0947383	-0.064449	1.01728	0.910381	0.960842	-0.0063335	-0.127256	-0.217506
YBL084C	CDC27	Subunit of the Anaphase-Promoting Complex/Cyclosome (APC/C), which is a ubiquitin-protein ligase required for degradation of anaphase inhibitors, including mitotic cyclins, during the metaphase/anaphase transition	-0.0704339	-0.427209	-0.21563	0.785128	0.96592	0.93551	-0.582781	-0.26871	-0.127118
YBL085W	BOI1	Protein implicated in polar growth, functionally redundant with Boi2p; interacts with bud-emergence protein Bem1p; contains an SH3 (src homology 3) domain and a PH (pleckstrin homology) domain	-0.05616	-0.0477168	0.008695	0.940674	1.15229	1.03548	0.262653	0.300886	0.303585
YBL086C	YBL086C	Protein of unknown function; green fluorescent protein (GFP)-fusion protein localizes to the cell periphery	0.101334	-0.0421971	0.190557	0.599351	0.77969	0.613968	-0.1246	-0.197705	-0.279321
YBL090W	MRP21	Mitochondrial ribosomal protein of the small subunit; MRP21 exhibits genetic interactions with mutations in the COX2 and COX3 mRNA 5'-untranslated leader sequences	-0.115322	-0.246296	-0.156727	0.383062	0.512441	0.569011	-0.197095	-0.24055	-0.199533
YBL091C	MAP2	Methionine aminopeptidase, catalyzes the cotranslational removal of N-terminal methionine from nascent polypeptides; function is partially redundant with that of Map1p	-0.0826169	-0.0517999	0.004127	1.02553	0.958537	1.06679	0.0332035	0.0068188	-0.007337
YBL092W	RPL32	Protein component of the large (60S) ribosomal subunit, has similarity to rat L32 ribosomal protein; overexpression disrupts telomeric silencing	0.0117003	-0.00139499	-0.010956	0.313318	0.0931041	0.163312	0.0675735	-0.026131	0.0148331
YBL093C	ROX3	Subunit of the RNA polymerase II mediator complex; associates with core polymerase subunits to form the RNA polymerase II holoenzyme	0.182364	0.159247	0.220805	0.337803	0.39069	0.460257	0.19659	-0.0039712	0.0894286
YBL095W	YBL095W	Putative protein of unknown function; the authentic, non-tagged protein is detected in highly purified mitochondria in high-throughput studies	-0.292764	-0.315552	-0.351078	0.349169	0.490683	0.471627	-0.628236	-0.894674	-0.530913
YBL097W	BRN1	Subunit of the condensin complex; required for chromosome condensation and for clustering of tRNA genes at the nucleolus; may influence multiple aspects of chromosome transmission	0.0452849	-0.0878764	0.0171177	0.47493	0.413683	0.44885	0.0194795	0.0221051	0.0887027
YBL098W	BNA4	Kynurenine 3-mono oxygenase, required for the de novo biosynthesis of NAD from tryptophan via kynurenine; expression regulated by Hst1p; putative therapeutic target for Huntington disease	-0.166882	-0.162927	-0.098833	0.107731	0.0691213	0.0862332	-0.699891	-0.599202	-0.761626
YBL099W	ATP1	Alpha subunit of the F1 sector of mitochondrial F1F0 ATP synthase, which is a large, evolutionarily conserved enzyme complex required for ATP synthesis; phosphorylated	-0.0653429	-0.0744737	-0.081017	0.19235	0.133902	0.151054	-0.542139	-0.537227	-0.528797
YBL101C	ECM21	Protein involved in regulating the endocytosis of plasma membrane proteins; identified as a substrate for ubiquitination by Rsp5p and deubiquitination by Ubp2p; promoter contains several Gcn4p binding elements	0.0428092	0.0687208	0.0779162	1.16698	1.10796	1.15941	0.0597415	0.0854917	0.132703
YBL102W	SFT2	Non-essential tetra-spanning membrane protein found mostly in the late Golgi, can suppress some sed5 alleles; may be part of the transport machinery, but precise function is unknown; similar to mammalian syntaxin 5	-0.14096	-0.0788723	-0.045502	0.853822	0.990962	0.947239	0.0348605	-0.0124382	0.0423753
YBL103C	RTG3	Basic helix-loop-helix-leucine zipper (bHLH/Zip) transcription factor that forms a complex with another bHLH/Zip protein, Rtg1p, to activate the retrograde (RTG) and TOR pathways	-0.0276782	0.14382	0.181012	0.827127	0.751467	0.760164	-0.223772	-0.0122913	0.122748
YBL104C	YBL104C	Putative protein of unknown function, promoter contains multiple GCN4 binding sites	0.149759	0.113973	0.0947391	0.770398	0.911736	0.95917	0.115576	0.139627	0.169223
YBL105C	PKC1	Protein serine/threonine kinase essential for cell wall remodeling during growth; localized to sites of polarized growth and the mother-daughter bud neck; homolog of the alpha, beta, and gamma isoforms of mammalian protein kinase C (PKC)	-0.0185289	0.00421562	0.172554	0.93336	0.96139	0.959041	0.189428	0.0678417	0.149651
YBL107C	YBL107C	Putative protein of unknown function; green fluorescent protein (GFP)-fusion protein localizes to the cytoplasm; YBL107C is not an essential gene	0.0493891	0.105517	0.0147406	0.983398	1.10987	1.05272	-0.0970768	-0.30509	-0.155872
YBR001C	NTH2	Putative neutral trehalase, required for thermotolerance and may mediate resistance to other cellular stresses	-0.0606219	-0.28632	-0.18386	0.746004	0.861718	0.736974	-0.770365	-0.707947	-0.833201
YBR002C	RER2	Cis-prenyltransferase involved in dolichol synthesis; participates in endoplasmic reticulum (ER) protein sorting	0.153837	0.13093	0.202951	0.976163	0.908393	0.795841	0.283536	0.149126	0.172733
YBR003W	COQ1	Hexaprenyl pyrophosphate synthetase, catalyzes the first step in ubiquinone (coenzyme Q) biosynthesis	0.0980155	-0.0532925	-0.064279	0.945088	0.810751	0.952901	-0.405991	-0.390002	-0.489762
YBR005W	RCR1	Protein of the ER membrane involved in cell wall chitin deposition; may function in the endosomal-vacuolar trafficking pathway, helping determine whether plasma membrane proteins are degraded or routed to the plasma membrane	0.181495	0.0451805	0.0260893	1.0845	1.08929	1.16339	0.278459	0.0379306	0.234513
YBR006W	UGA2	Succinate semialdehyde dehydrogenase involved in the utilization of gamma-aminobutyrate (GABA) as a nitrogen source; part of the 4-aminobutyrate and glutamate degradation pathways; localized to the cytoplasm	0.206	0.0755414	0.116709	1.09371	1.16861	1.0469	-1.00633	-1.1086	-1.11059
YBR011C	IPP1	Cytoplasmic inorganic pyrophosphatase (PPase), homodimer that catalyzes the rapid exchange of oxygens from Pi with water, highly expressed and essential for viability, active-site residues show identity to those from E. coli PPase	-0.0963059	0.056428	-0.057876	0.843614	0.651222	0.883011	-0.41945	-0.458932	-0.489864
YBR014C	GRX7	Cis-golgi localized monothiol glutaredoxin; more similar in activity to dithiol than other monothiol glutaredoxins; involved in the oxidative stress response; does not bind metal ions; functional overlap with GRX6	-0.131689	-0.0450024	-0.236788	0.0665652	0.461312	0.603767	-0.198877	-0.200886	-0.24289
YBR015C	MNN2	Alpha-1,2-mannosyltransferase, responsible for addition of the first alpha-1,2-linked mannose to form the branches on the mannan backbone of oligosaccharides, localizes to an early Golgi compartment	-0.0067335	-0.103171	-0.066086	0.56385	0.666334	0.687782	-0.291222	-0.335274	-0.315636
YBR017C	KAP104	Transportin or cytosolic karyopherin beta 2; functions in the rg-nuclear localization signal-mediated nuclear import/reimport of mRNA-binding proteins Nab2p and Hrp1p; regulates asymmetric protein synthesis in daughter cells during mitosis	0.0129011	0.0124708	0.0218999	0.77524	0.736424	0.714267	0.0329585	0.0794047	0.0906534
YBR022W	POA1	Phosphatase that is highly specific for ADP-ribose 1''-phosphate, a tRNA splicing metabolite; may have a role in regulation of tRNA splicing	0.0783547	-0.00338042	0.109195	0.831335	0.669827	0.815336	-0.027756	-0.0567961	-0.0138621
YBR023C	CHS3	Chitin synthase III, catalyzes the transfer of N-acetylglucosamine (GlcNAc) to chitin; required for synthesis of the majority of cell wall chitin, the chitin ring during bud emergence, and spore wall chitosan	0.15966	0.133856	0.184097	1.37771	1.29101	1.31528	0.473562	0.530016	0.382143
YBR024W	SCO2	Protein anchored to the mitochondrial inner membrane, similar to Sco1p and may have a redundant function with Sco1p in delivery of copper to cytochrome c oxidase; interacts with Cox2p	-0.0616009	-0.00325531	0.0683759	1.23624	1.02368	0.927577	-0.0445662	-0.227791	-0.327081
YBR025C	OLA1	P-loop ATPase with similarity to human OLA1 and bacterial YchF; identified as specifically interacting with the proteasome; protein levels are induced by hydrogen peroxide	-0.0073056	-0.0209176	-0.01681	0.788389	0.758191	0.833458	-0.0985936	-0.137995	-0.16004
YBR026C	ETR1	2-enoyl thioester reductase, member of the medium chain dehydrogenase/reductase family; localized to in mitochondria, where it has a probable role in fatty acid synthesis	-0.0254355	-0.0403218	0.0120227	1.02216	0.82696	0.934126	-0.297451	-0.36048	-0.393252
YBR028C	YBR028C	Putative protein kinase, possible substrate of cAMP-dependent protein kinase (PKA)	-0.243985	-0.320775	-0.197741	0.249299	0.188742	0.202789	-0.78877	-0.857091	-0.868927
YBR029C	CDS1	Phosphatidate cytidylyltransferase (CDP-diglyceride synthetase); an enzyme that catalyzes that conversion of CTP + phosphate into diphosphate + CDP-diaclglyerol, a critical step in the synthesis of all major yeast phospholipids	0.337049	0.0738	0.0617287	1.10479	0.832089	1.05285	0.0287715	-0.152296	-0.142696
YBR030W	RKM3	Ribosomal lysine methyltransferase specific for monomethylation of Rpl42ap and Rpl42bp (lysine 40); nuclear SET domain containing protein	-0.0556327	-0.00190886	-0.106409	0.924933	0.863711	0.984901	0.353093	0.40798	0.420598
YBR031W	RPL4A	N-terminally acetylated protein component of the large (60S) ribosomal subunit, nearly identical to Rpl4Bp and has similarity to E. coli L4 and rat L4 ribosomal proteins	-0.0456596	0.00797425	0.002674	0.0745905	0.0025948	0.069617	-0.150741	-0.146011	-0.180848
YBR034C	HMT1	Nuclear SAM-dependent mono- and asymmetric arginine dimethylating methyltransferase that modifies hnRNPs, including Npl3p and Hrp1p, affecting their activity and nuclear export; methylates U1 snRNP protein Snp1p and ribosomal protein Rps2p	-0.0377167	0.0602403	0.044384	1.0755	0.925602	1.09589	0.0249305	-0.0048626	-0.0069598
YBR035C	PDX3	Pyridoxine (pyridoxamine) phosphate oxidase, has homologs in E. coli and Myxococcus xanthus; transcription is under the general control of nitrogen metabolism	-0.180535	-0.192142	-0.218168	0.496194	0.419122	0.557269	-0.336225	-0.506231	-0.414325
YBR036C	CSG2	Endoplasmic reticulum membrane protein, required for mannosylation of inositolphosphorylceramide and for growth at high calcium concentrations	-0.161168	-0.224018	-0.196352	0.858104	0.799941	0.940328	0.65873	0.409472	0.587726
YBR037C	SCO1	Copper-binding protein of the mitochondrial inner membrane, required for cytochrome c oxidase activity and respiration; may function to deliver copper to cytochrome c oxidase; has similarity to thioredoxins	-0.0952969	-0.0358913	-0.114512	1.31642	1.25608	1.00417	-0.0740683	-0.0544897	-0.0110811
YBR038W	CHS2	Chitin synthase II; catalyzes transfer of N-acetylglucosamine (GlcNAc) to chitin upon activation of zymogenic form; required for chitin synthesis in the primary septum during cytokinesis; localization regulated by Cdk1p during mitosis	0.0832084	-0.0661733	-0.091469	1.23077	1.46393	1.37864	0.901949	0.984315	0.989287
YBR039W	ATP3	Gamma subunit of the F1 sector of mitochondrial F1F0 ATP synthase, which is a large, evolutionarily conserved enzyme complex required for ATP synthesis	-0.161931	-0.0771072	-0.196482	-0.120079	-0.193588	-0.067474	-0.509503	-0.517301	-0.519937
YBR041W	FAT1	Very long chain fatty acyl-CoA synthetase and long chain fatty acid transporter; activates imported fatty acids with a preference for very long lengths (C20-C26); has a separate function in the transport of long chain fatty acids	0.0778559	0.0564876	0.0368726	1.00879	0.952478	1.02892	0.150146	0.17027	0.123592
YBR042C	CST26	Protein required for incorporation of stearic acid into phosphatidylinositol; affects chromosome stability when overexpressed	0.171536	0.0739859	-0.042672	1.24556	1.01606	1.09137	0.0207185	0.0359252	-0.0745157
YBR044C	TCM62	Protein involved in the assembly of the mitochondrial succinate dehydrogenase complex; putative chaperone	-0.011917	-0.167031	-0.225388	0.705945	0.586069	0.610047	-0.426157	-0.602755	-0.359589
YBR046C	ZTA1	NADPH-dependent quinone reductase, GFP-tagged protein localizes to the cytoplasm and nucleus; has similarity to E. coli quinone oxidoreductase and to human zeta-crystallin	-0.0802039	-0.135353	0.005332	0.4028	0.448462	0.417192	-0.214317	-0.273506	-0.273826
YBR049C	REB1	RNA polymerase I enhancer binding protein; DNA binding protein which binds to genes transcribed by both RNA polymerase I and RNA polymerase II; required for termination of RNA polymerase I transcription	-0.0077542	-0.136659	-0.121968	0.392391	0.364532	0.372963	-0.164593	-0.0570107	-0.126303
YBR052C	RFS1	Protein of unknown function; member of a flavodoxin-like fold protein family that includes Pst2p and Ycp4p; green fluorescent protein (GFP)-fusion protein localizes to the cytoplasm in a punctate pattern	0.0057914	-0.0328627	-0.049155	1.13581	1.00022	1.11499	-0.450958	-0.495938	-0.525318
YBR053C	YBR053C	Putative protein of unknown function; induced by cell wall perturbation	0.1981	0.1419	0.211868	1.45812	1.41112	1.4882	0.497758	0.25576	0.50426
YBR054W	YRO2	Putative protein of unknown function; the authentic, non-tagged protein is detected in a phosphorylated state in highly purified mitochondria in high-throughput studies; transcriptionally regulated by Haa1p	-0.301459	-0.300998	-0.466531	1.50145	1.58541	1.66074	-2.40699	-2.05829	-3.92358
YBR055C	PRP6	Splicing factor, component of the U4/U6-U5 snRNP complex	-0.0223019	-0.278382	-0.115055	0.595313	0.64538	0.792152	-0.293555	-0.206836	-0.312298
YBR056W	YBR056W	Putative cytoplasmic protein of unknown function	0.194543	0.137838	0.125985	1.1561	1.12095	1.16516	-0.0733648	-0.0403579	-0.16943
YBR057C	MUM2	Cytoplasmic protein essential for meiotic DNA replication and sporulation; interacts with Orc2p, which is a component of the origin recognition complex	-0.191366	-0.0613393	-0.024899	0.827692	0.903863	0.881814	-0.077636	-0.127433	-0.137988
YBR058C	UBP14	Ubiquitin-specific protease that specifically disassembles unanchored ubiquitin chains; involved in fructose-1,6-bisphosphatase (Fbp1p) degradation; similar to human isopeptidase T	0.106806	0.0409497	0.094432	0.965682	1.00574	1.01072	0.0580845	-0.0331519	0.0350766
YBR058C-A	TSC3	Protein that stimulates the activity of serine palmitoyltransferase (Lcb1p, Lcb2p) several-fold; involved in sphingolipid biosynthesis	-0.251503	-0.289742	-0.284986	0.205432	0.0743314	0.0674836	0.0618975	-0.049973	-0.156428
YBR059C	AKL1	Ser-Thr protein kinase, member (with Ark1p and Prk1p) of the Ark kinase family; involved in endocytosis and actin cytoskeleton organization	0.0844177	0.0572565	0.0949402	1.22808	1.13633	1.16987	0.162122	0.305412	0.186084
YBR060C	ORC2	Subunit of the origin recognition complex, which directs DNA replication by binding to replication origins and is also involved in transcriptional silencing; interacts with Spp1p and with trimethylated histone H3; phosphorylated by Cdc28p	0.0815428	0.0173976	0.0111756	0.196838	0.588751	0.402127	0.15069	0.258857	0.0738294
YBR061C	TRM7	2'-O-ribose methyltransferase, methylates the 2'-O-ribose of nucleotides at positions 32 and 34 of the tRNA anticodon loop	0.0644611	-0.0313658	0.0135617	0.621106	0.578753	0.649499	0.12587	0.154781	0.123157
YBR062C	YBR062C	Protein of unknown function that interacts with Msb2p; may play a role in activation of the filamentous growth pathway.	-0.35075	-0.188607	0.259275	0.64012	0.893688	0.95955	0.194901	0.165117	0.34731
YBR065C	ECM2	Pre-mRNA splicing factor, facilitates the cooperative formation of U2/U6 helix II in association with stem II in the spliceosome, function may be regulated by Slu7p	0.0331211	0.0131795	0.0519632	0.658848	0.727649	0.697804	-0.135426	-0.198215	-0.225513
YBR068C	BAP2	High-affinity leucine permease, functions as a branched-chain amino acid permease involved in the uptake of leucine, isoleucine and valine; contains 12 predicted transmembrane domains	0.0832785	-0.0692721	-0.101162	0.709724	0.613918	0.732202	0.290311	0.272937	0.244694
YBR069C	TAT1	Amino acid transport protein for valine, leucine, isoleucine, and tyrosine, low-affinity tryptophan and histidine transporter; overexpression confers FK506 and FTY720 resistance	0.161567	-0.0867511	-0.053045	1.12695	1.07387	1.23412	0.11692	0.0443546	0.0256503
YBR070C	ALG14	Component of UDP-GlcNAc transferase required for the second step of dolichyl-linked oligosaccharide synthesis; anchors the catalytic subunit Alg13p to the ER membrane; similar to bacterial and human glycosyltransferases	-0.265741	-0.194695	-0.25672	0.560851	0.395094	0.439695	0.0856655	0.103975	-0.0227651
YBR071W	YBR071W	Putative protein of unknown function; (GFP)-fusion and epitope-tagged proteins localize to the cytoplasm; mRNA expression may be regulated by the cell cycle and/or cell wall stress	-0.339065	-0.14264	-0.158842	0.28875	0.738247	0.62273	0.365576	0.342403	0.318733
YBR072W	HSP26	Small heat shock protein (sHSP) with chaperone activity; forms hollow, sphere-shaped oligomers that suppress unfolded proteins aggregation; oligomer activation requires heat-induced conformational change; also has mRNA binding activity	0.250262	0.228004	0.203006	2.31713	2.20128	2.34842	-1.57068	-1.59576	-1.85585
YBR073W	RDH54	DNA-dependent ATPase, stimulates strand exchange by modifying the topology of double-stranded DNA; involved in recombinational repair of DNA double-strand breaks during mitosis and meiosis; proposed to be involved in crossover interference	0.132711	0.00573689	-0.003732	1.13159	1.1146	1.06322	-0.0798346	0.0409473	-0.058989
YBR074W	YBR074W	Putative metalloprotease	-0.0100878	-0.0731995	-0.099711	0.714743	0.6408	0.724616	-0.0891792	-0.0203035	-0.0703387
YBR077C	SLM4	Component of the EGO complex, which is involved in the regulation of microautophagy, and of the GSE complex, which is required for proper sorting of amino acid permease Gap1p; gene exhibits synthetic genetic interaction with MSS4	-0.121352	-0.163683	-0.143466	0.400683	0.394648	0.448935	0.172352	-0.174825	-0.103055
YBR078W	ECM33	GPI-anchored protein of unknown function, has a possible role in apical bud growth; GPI-anchoring on the plasma membrane crucial to function; phosphorylated in mitochondria; similar to Sps2p and Pst1p	-0.0586608	-0.0807953	-0.183115	1.00441	1.02193	1.21994	-0.205243	-0.0411311	-0.119419
YBR079C	RPG1	eIF3a subunit of the core complex of translation initiation factor 3 (eIF3), essential for translation; part of a Prt1p-Rpg1p-Nip1p subcomplex that stimulates binding of mRNA and tRNA(i)Met to ribosomes; involved in translation reinitiation	0.0355991	0.0952451	0.0190936	0.368211	0.311577	0.386682	-0.0786486	-0.0513256	-0.076041
YBR080C	SEC18	ATPase required for vesicular transport between ER and Golgi, the 'priming' step in homotypic vacuole fusion, autophagy, and protein secretion; releases Sec17p from SNAP complexes; has similarity to mammalian NSF	0.0446065	0.0401679	-0.004529	0.776846	0.771346	0.847976	-0.0254024	-0.0391396	-0.117521
YBR081C	SPT7	Subunit of the SAGA transcriptional regulatory complex, involved in proper assembly of the complex; also present as a C-terminally truncated form in the SLIK/SALSA transcriptional regulatory complex	0.0677359	-0.0296784	-0.01062	0.889985	0.823968	0.860487	0.0878135	0.172669	0.108111
YBR082C	UBC4	Ubiquitin-conjugating enzyme (E2), mediates degradation of abnormal or excess proteins, including calmodulin and histone H3; interacts with many SCF ubiquitin protein ligases; component of the cellular stress response	0.179472	0.133202	0.0416646	0.824595	0.81279	0.77383	-0.0492069	-0.368996	-0.0958322
YBR084C-A	RPL19A	Protein component of the large (60S) ribosomal subunit, nearly identical to Rpl19Bp and has similarity to rat L19 ribosomal protein; rpl19a and rpl19b single null mutations result in slow growth, while the double null mutation is lethal	0.0601282	-0.0137513	-0.016661	0.0351086	0.0176522	0.0541775	-0.0702276	-0.128542	-0.138214
YBR084W	MIS1	Mitochondrial C1-tetrahydrofolate synthase, involved in interconversion between different oxidation states of tetrahydrofolate (THF); provides activities of formyl-THF synthetase, methenyl-THF cyclohydrolase, and methylene-THF dehydrogenase	0.0362115	0.106267	0.068331	0.887129	0.79337	0.902684	-0.140823	-0.0995449	-0.191332
YBR085C-A	YBR085C-A	Putative protein of unknown function; green fluorescent protein (GFP)-fusion protein localizes to the cytoplasm and to the nucleus	0.03026	0.00958609	-0.038331	0.501284	0.805186	0.64392	-0.804198	-0.931969	-0.796172
YBR085W	AAC3	Mitochondrial inner membrane ADP/ATP translocator, exchanges cytosolic ADP for mitochondrially synthesized ATP; expressed under anaerobic conditions; similar to Pet9p and Aac1p; has roles in maintenance of viability and in respiration	0.288056	0.236395	0.313301	0.535638	0.64497	0.508809	-0.182007	-0.307664	-0.29016
YBR086C	IST2	Plasma membrane protein that may be involved in osmotolerance, localizes to the mother cell in small-budded cells and to the bud in medium- and large-budded cells; mRNA is transported to the bud tip by an actomyosin-driven process	0.13279	-0.0236248	-0.032566	1.24542	1.05305	1.20631	0.117763	0.242245	0.182613
YBR087W	RFC5	Subunit of heteropentameric Replication factor C (RF-C), which is a DNA binding protein and ATPase that acts as a clamp loader of the proliferating cell nuclear antigen (PCNA) processivity factor for DNA polymerases delta and epsilon	0.0421388	0.0935129	0.105353	0.585658	0.564608	0.544305	0.27416	0.2358	0.273156
YBR088C	POL30	Proliferating cell nuclear antigen (PCNA), functions as the sliding clamp for DNA polymerase delta; may function as a docking site for other proteins required for mitotic and meiotic chromosomal DNA replication and for DNA repair	-0.0421312	0.0183419	-0.02021	1.20841	1.03319	1.19638	0.0092755	-0.0561278	-0.0303664
YBR089C-A	NHP6B	High-mobility group (HMG) protein that binds to and remodels nucleosomes; involved in recruiting FACT and other chromatin remodelling complexes to the chromosomes; functionally redundant with Nhp6Ap; homologous to mammalian HMGB1 and HMGB2	0.0107346	0.104927	0.24987	0.99247	0.868452	0.748138	0.393545	0.307147	0.0898676
YBR091C	TIM12	Essential protein of the inner mitochondrial membrane, peripherally localized; component of the TIM22 complex, which is a twin-pore translocase that mediates insertion of numerous multispanning inner membrane proteins	-0.0743029	-0.168252	-0.16012	0.913137	0.922418	0.799761	0.514575	0.574365	0.526006
YBR092C	PHO3	Constitutively expressed acid phosphatase similar to Pho5p; brought to the cell surface by transport vesicles; hydrolyzes thiamin phosphates in the periplasmic space, increasing cellular thiamin uptake; expression is repressed by thiamin	0.139587	0.128734	0.120454	0.703577	0.674037	0.6593	-1.74936	-1.68837	-1.86306
YBR093C	PHO5	Repressible acid phosphatase (1 of 3) that also mediates extracellular nucleotide-derived phosphate hydrolysis; secretory pathway derived cell surface glycoprotein; induced by phosphate starvation and coordinately regulated by PHO4 and PHO2	0.25047	0.301663	0.195831	0.69853	0.6625	0.734971	-1.88146	-2.03231	-2.00566
YBR094W	PBY1	Putative tubulin tyrosine ligase associated with P-bodies	-0.0087161	-0.023132	0.0483166	0.878736	0.792987	0.818292	-0.203505	-0.239067	-0.235348
YBR095C	RXT2	Subunit of the histone deacetylase Rpd3L complex; possibly involved in cell fusion and invasive growth	-0.0082942	-0.0109979	-0.020639	0.404167	0.492181	0.429083	0.195339	0.0774457	0.136114
YBR096W	YBR096W	Putative protein of unknown function; green fluorescent protein (GFP)-fusion protein localizes to the ER	0.217131	0.145335	0.272642	1.09696	1.19599	0.977756	0.505764	0.591915	0.727738
YBR097W	VPS15	Myristoylated serine/threonine protein kinase involved in vacuolar protein sorting; functions as a membrane-associated complex with Vps34p; active form recruits Vps34p to the Golgi membrane; interacts with the GDP-bound form of Gpa1p	0.288605	-0.424071	-0.329277	0.867565	1.02248	0.877403	0.251001	-0.180009	-0.143988
YBR101C	FES1	Hsp70 (Ssa1p) nucleotide exchange factor, cytosolic homolog of Sil1p, which is the nucleotide exchange factor for BiP (Kar2p) in the endoplasmic reticulum	0.0260463	0.0361697	0.0135632	1.0313	0.915329	1.06805	0.517157	0.523386	0.514772
YBR102C	EXO84	Essential protein with dual roles in spliceosome assembly and exocytosis; the exocyst complex (Sec3p, Sec5p, Sec6p, Sec8p, Sec10p, Sec15p, Exo70p, and Exo84p) mediates polarized targeting of secretory vesicles to active sites of exocytosis	0.0135667	-0.0161494	-0.044211	0.758225	0.853954	0.815107	0.0094725	0.0919477	-0.080939
YBR103W	SIF2	WD40 repeat-containing subunit of the Set3C histone deacetylase complex, which represses early/middle sporulation genes; antagonizes telomeric silencing; binds specifically to the Sir4p N-terminus	0.0267651	-0.0464864	0.050228	0.837755	0.812744	0.876505	0.112802	0.128734	0.128688
YBR104W	YMC2	Mitochondrial protein, putative inner membrane transporter with a role in oleate metabolism and glutamate biosynthesis; member of the mitochondrial carrier (MCF) family; has similarity with Ymc1p	-0.0607649	-0.0258378	0.0224429	0.692725	0.645287	0.682294	0.175917	0.154466	0.105468
YBR106W	PHO88	Probable membrane protein, involved in phosphate transport; pho88 pho86 double null mutant exhibits enhanced synthesis of repressible acid phosphatase at high inorganic phosphate concentrations	0.109195	0.1201	0.0628912	1.18029	1.07419	1.20598	-0.0697982	-0.0389155	-0.0726381
YBR108W	AIM3	Protein interacting with Rvs167p; null mutant is viable and displays elevated frequency of mitochondrial genome loss	0.0315632	0.0275891	0.0162282	1.14211	1.01377	0.977484	0.518618	0.177924	0.383432
YBR109C	CMD1	Calmodulin; Ca++ binding protein that regulates Ca++ independent processes (mitosis, bud growth, actin organization, endocytosis, etc.) and Ca++ dependent processes (stress-activated pathways), targets include Nuf1p, Myo2p and calcineurin	-0.30559	-0.16078	-0.170666	0.441937	0.551896	0.596714	-0.0819783	5.54e-05	-0.0047858
YBR110W	ALG1	Mannosyltransferase, involved in asparagine-linked glycosylation in the endoplasmic reticulum (ER); essential for viability, mutation is functionally complemented by human ortholog	0.0406361	-0.0439443	-0.001723	0.635819	0.793187	0.808656	0.0126015	0.001265	-0.0073258
YBR111C	YSA1	Nudix hydrolase family member with ADP-ribose pyrophosphatase activity; shown to metabolize O-acetyl-ADP-ribose to AMP and acetylated ribose 5'-phosphate	-0.143685	-0.0887987	-0.236575	0.68278	0.50334	0.67622	-0.535065	-0.772855	-0.661282
YBR111W-A	SUS1	Protein involved in mRNA export coupled transcription activation and elongation; component of both the SAGA histone acetylase complex and TREX-2, and interacts with RNAPII	-0.035379	-0.0231988	0.004683	0.154217	0.428773	0.321151	0.0916875	0.148913	0.208799
YBR112C	CYC8	General transcriptional co-repressor, acts together with Tup1p; also acts as part of a transcriptional co-activator complex that recruits the SWI/SNF and SAGA complexes to promoters; can form the prion [OCT+]	-0.0303337	0.0199193	0.103329	0.538114	0.473564	0.430134	0.0373705	0.0958277	0.0767033
YBR115C	LYS2	Alpha aminoadipate reductase, catalyzes the reduction of alpha-aminoadipate to alpha-aminoadipate 6-semialdehyde, which is the fifth step in biosynthesis of lysine; activation requires posttranslational phosphopantetheinylation by Lys5p	0.0409291	0.00700388	0.164841	-0.0406031	-0.035987	-0.0810113	-0.108392	-0.0349353	0.0108298
YBR117C	TKL2	Transketolase, similar to Tkl1p; catalyzes conversion of xylulose-5-phosphate and ribose-5-phosphate to sedoheptulose-7-phosphate and glyceraldehyde-3-phosphate in the pentose phosphate pathway; needed for synthesis of aromatic amino acids	-0.212797	-0.247968	-0.253239	2.82986	2.94284	2.93769	-0.948325	-0.858724	-0.832143
YBR119W	MUD1	U1 snRNP A protein, homolog of human U1-A; involved in nuclear mRNA splicing	0.0344211	0.115123	0.247937	-0.207582	-0.0037702	-0.0606454	0.348919	0.156538	0.107255
YBR120C	CBP6	Mitochondrial translational activator of the COB mRNA; phosphorylated	-0.233847	-0.18859	-0.200438	0.112876	0.142981	0.203916	-0.370421	-0.306949	-0.392046
YBR121C	GRS1	Cytoplasmic and mitochondrial glycyl-tRNA synthase that ligates glycine to the cognate anticodon bearing tRNA; transcription termination factor that may interact with the 3'-end of pre-mRNA to promote 3'-end formation	-0.020198	0.00788697	-0.05261	0.841827	0.798008	0.920538	-0.355513	-0.364391	-0.424954
YBR122C	MRPL36	Mitochondrial ribosomal protein of the large subunit; overproduction suppresses mutations in the COX2 leader peptide-encoding region	-0.0713929	-0.0869649	-0.076383	0.225279	0.223286	0.279125	-0.10644	-0.132254	-0.216613
YBR123C	TFC1	One of six subunits of the RNA polymerase III transcription initiation factor complex (TFIIIC); part of the TauA globular domain of TFIIIC that binds DNA at the BoxA promoter sites of tRNA and similar genes; human homolog is TFIIIC-63	0.0074966	-0.0602907	0.0627453	0.600522	0.708724	0.772477	-0.131242	-0.141203	-0.184065
YBR125C	PTC4	Cytoplasmic type 2C protein phosphatase (PP2C); identified as a high-copy number suppressor of cnb1 mpk1 synthetic lethality; overexpression decreases high-osmolarity induced Hog1p phosphorylation and kinase activity	-0.0625879	-0.123986	-0.115677	1.07051	1.02477	1.00245	0.346162	0.270545	0.240951
YBR126C	TPS1	Synthase subunit of trehalose-6-phosphate synthase/phosphatase complex, which synthesizes the storage carbohydrate trehalose; also found in a monomeric form; expression is induced by the stress response and repressed by the Ras-cAMP pathway	-0.0236001	0.0373744	0.00616	0.904557	0.951628	0.92701	-0.261286	-0.302465	-0.241644
YBR126W-A	YBR126W-A	Dubious ORF unlikely to encode a protein, based on available experimental and comparative sequence data; partially overlaps the dubious ORF YBR126W-B; identified by gene-trapping, microarray analysis, and genome-wide homology searches	0.151639	-0.0282808	0.247283	0.420046	0.423783	0.461063	-0.0722406	0.064299	0.0001785
YBR127C	VMA2	Subunit B of the eight-subunit V1 peripheral membrane domain of the vacuolar H+-ATPase (V-ATPase), an electrogenic proton pump found throughout the endomembrane system; contains nucleotide binding sites; also detected in the cytoplasm	-0.0605769	-0.0156834	-0.029601	0.809011	0.756828	0.787977	-0.199657	-0.240993	-0.252977
YBR129C	OPY1	Protein of unknown function, overproduction blocks cell cycle arrest in the presence of mating pheromone; the authentic, non-tagged protein is detected in highly purified mitochondria in high-throughput studies	-0.0745389	-0.0922752	0.0016	0.679481	0.870001	0.88456	0.0309985	-0.0100042	-0.0115237
YBR130C	SHE3	Protein that acts as an adaptor between Myo4p and the She2p-mRNA complex; part of the mRNA localization machinery that restricts accumulation of certain proteins to the bud; also required for cortical ER inheritance	0.0115563	0.0204033	-0.022008	0.598119	0.743727	0.803479	0.174188	0.102386	0.0450056
YBR133C	HSL7	Protein arginine N-methyltransferase that exhibits septin and Hsl1p-dependent bud neck localization and periodic Hsl1p-dependent phosphorylation; required along with Hsl1p for bud neck recruitment, phosphorylation, and degradation of Swe1p	-0.0657939	-0.116284	-0.03481	0.956077	0.932879	0.910892	-0.0468926	0.0078256	-0.0371353
YBR135W	CKS1	Cyclin-dependent protein kinase regulatory subunit and adaptor; modulates proteolysis of M-phase targets through interactions with the proteasome; role in transcriptional regulation, recruiting proteasomal subunits to target gene promoters	0.127637	-0.0162302	0.118059	1.39668	1.22601	1.3038	0.19665	0.189997	0.23059
YBR136W	MEC1	Genome integrity checkpoint protein and PI kinase superfamily member; signal transducer required for cell cycle arrest and transcriptional responses prompted by damaged or unreplicated DNA; monitors and participates in meiotic recombination	-0.0941139	-0.168677	-0.079405	-0.0688841	-0.183106	-0.0105975	0.159275	0.158122	0.209846
YBR138C	YBR138C	Cytoplasmic protein of unknown function, potentially phosphorylated by Cdc28p; YBR138C is not an essential gene	0.0110288	-0.0312431	0.0325381	0.839319	1.01826	0.981985	0.173112	0.235138	0.125851
YBR139W	YBR139W	Putative serine type carboxypeptidase with a role in phytochelatin synthesis; green fluorescent protein (GFP)-fusion protein localizes to the vacuole; expression induced by nitrogen limitation in a GLN3, GAT1-independent manner	0.0134081	0.0671167	-0.004293	1.15008	1.02871	0.917698	0.0775125	0.0040597	-0.0790836
YBR140C	IRA1	GTPase-activating protein that negatively regulates RAS by converting it from the GTP- to the GDP-bound inactive form, required for reducing cAMP levels under nutrient limiting conditions, mediates membrane association of adenylate cyclase	0.022454	-0.0749736	-0.170229	0.823272	0.834589	0.754683	-0.0710266	0.110462	-0.0185832
YBR141C	YBR141C	Putative S-adenosylmethionine-dependent methyltransferase; green fluorescent protein (GFP)-fusion protein localizes to the nucleolus; YBR141C is not an essential gene	0.0755013	-0.116867	0.212908	0.756109	0.5599	0.761446	0.369703	0.513398	0.43577
YBR142W	MAK5	Essential nucleolar protein, putative DEAD-box RNA helicase required for maintenance of M1 dsRNA virus; involved in biogenesis of large (60S) ribosomal subunits	0.0302777	0.0770614	0.0329747	0.868239	0.841474	0.923518	0.0490845	0.0092116	0.0136347
YBR143C	SUP45	Polypeptide release factor (eRF1) in translation termination; mutant form acts as a recessive omnipotent suppressor; methylated by Mtq2p-Trm112p in ternary complex eRF1-eRF3-GTP; mutation of methylation site confers resistance to zymocin	-0.0253268	0.102118	0.007502	0.96876	0.779539	1.01054	-0.0594237	-0.0250241	-0.103154
YBR145W	ADH5	Alcohol dehydrogenase isoenzyme V; involved in ethanol production	-0.166067	-0.153202	-0.166368	-1.03324	-1.01435	-0.970846	-0.767188	-0.792447	-0.781298
YBR146W	MRPS9	Mitochondrial ribosomal protein of the small subunit	-0.016508	-0.0828584	0.0278555	0.544278	0.533992	0.46271	-0.0764435	-0.151493	-0.13557
YBR149W	ARA1	NADP+ dependent arabinose dehydrogenase, involved in carbohydrate metabolism; purified as homodimer; naturally occurs with a N-terminus degradation product	-0.0538925	-0.057518	-0.07912	0.970304	0.819199	0.968248	-0.167494	-0.212935	-0.226107
YBR151W	APD1	Protein of unknown function, required for normal localization of actin patches and for normal tolerance of sodium ions and hydrogen peroxide; localizes to both cytoplasm and nucleus	0.125316	0.05396	0.127011	1.11964	1.05752	1.13282	-0.0836571	-0.0965158	-0.0684925
YBR153W	RIB7	Diaminohydroxyphoshoribosylaminopyrimidine deaminase; catalyzes the second step of the riboflavin biosynthesis pathway	0.388904	0.165802	0.127454	0.389735	0.625563	0.331925	-0.0460637	-0.308991	-0.131646
YBR154C	RPB5	RNA polymerase subunit ABC27, common to RNA polymerases I, II, and III; contacts DNA and affects transactivation	0.0160832	0.0766707	0.0771852	0.963171	0.998064	0.966962	0.0653025	0.12093	0.0859335
YBR155W	CNS1	TPR-containing co-chaperone; binds both Hsp82p (Hsp90) and Ssa1p (Hsp70) and stimulates the ATPase activity of SSA1, ts mutants reduce Hsp82p function while over expression suppresses the phenotypes of an HSP82 ts allele and a cpr7 deletion	0.0257934	0.0444402	0.0331304	0.905052	0.858997	1.01062	0.0121045	0.0121175	-0.0354412
YBR156C	SLI15	Subunit of the conserved chromosomal passenger complex (CPC; Ipl1p-Sli15p-Bir1p-Nbl1p), which regulates kinetochore-microtubule attachments, activation of the spindle tension checkpoint, and mitotic spindle disassembly	-0.11292	0.401864	0.19737	0.373772	0.943574	0.55984	0.0923095	0.0061693	-0.0541179
YBR159W	IFA38	Microsomal beta-keto-reductase; contains oleate response element (ORE) sequence in the promoter region; mutants exhibit reduced VLCFA synthesis, accumulate high levels of dihydrosphingosine, phytosphingosine and medium-chain ceramides	0.0114029	-0.0469167	-0.083142	0.932838	0.835544	0.853785	-0.0954458	-0.0227931	-0.0695936
YBR160W	CDC28	Catalytic subunit of the main cell cycle cyclin-dependent kinase (CDK); alternately associates with G1 cyclins (CLNs) and G2/M cyclins (CLBs) which direct the CDK to specific substrates	0.0412294	0.0942096	0.12521	1.08855	1.01985	1.04725	0.126822	0.165254	0.0986357
YBR162C	TOS1	Covalently-bound cell wall protein of unknown function; identified as a cell cycle regulated SBF target gene; deletion mutants are highly resistant to treatment with beta-1,3-glucanase; has sequence similarity to YJL171C	0.0856648	0.0824832	0.186173	1.18095	0.982331	1.19299	0.0389455	0.13161	0.102586
YBR164C	ARL1	Soluble GTPase with a role in regulation of membrane traffic; regulates potassium influx; G protein of the Ras superfamily, similar to ADP-ribosylation factor	-0.0015915	-0.000784165	-0.056638	0.829375	0.912095	0.881622	0.172798	0.0742947	0.241526
YBR166C	TYR1	Prephenate dehydrogenase involved in tyrosine biosynthesis, expression is dependent on phenylalanine levels	-0.158163	-0.163354	-0.081408	0.810668	0.746114	0.746976	0.105712	0.0809617	0.108415
YBR167C	POP7	Subunit of both RNase MRP, which cleaves pre-rRNA, and nuclear RNase P, which cleaves tRNA precursors to generate mature 5' ends	-0.0942689	-0.083409	0.0379825	0.350153	0.243835	0.242832	0.138489	0.156496	0.210592
YBR169C	SSE2	Member of the heat shock protein 70 (HSP70) family; may be involved in protein folding; localized to the cytoplasm; highly homologous to the heat shock protein Sse1p	0.257573	0.154593	0.155098	1.10314	1.11239	1.13057	-0.546273	-0.614871	-0.659918
YBR170C	NPL4	Endoplasmic reticulum and nuclear membrane protein, forms a complex with Cdc48p and Ufd1p that recognizes ubiquitinated proteins in the endoplasmic reticulum and delivers them to the proteasome for degradation	0.120188	0.0361987	0.14463	1.30882	1.26627	1.23126	0.0150885	0.0373518	0.0177111
YBR171W	SEC66	Non-essential subunit of Sec63 complex (Sec63p, Sec62p, Sec66p and Sec72p); with Sec61 complex, Kar2p/BiP and Lhs1p forms a channel competent for SRP-dependent and post-translational SRP-independent protein targeting and import into the ER	-0.0158813	0.131992	0.0648939	0.0289185	-0.0070437	0.0610972	0.156472	0.218953	0.17223
YBR172C	SMY2	Protein of unknown function involved in COPII vesicle formation; interacts with the Sec23p/Sec24p subcomplex; overexpression suppresses the temperature sensitivity of a myo2 mutant; has similarity to S. pombe Mpd2	0.0013076	-0.104008	0.000428	0.75382	0.8225	0.75746	-0.186836	-0.263709	-0.222841
YBR173C	UMP1	Short-lived chaperone required for correct maturation of the 20S proteasome; may inhibit premature dimerization of proteasome half-mers; degraded by proteasome upon completion of its assembly	0.0207734	0.229571	0.295114	1.16748	1.45733	1.38901	0.605799	0.821302	0.757154
YBR175W	SWD3	Essential subunit of the COMPASS (Set1C) complex, which methylates histone H3 on lysine 4 and is required in transcriptional silencing near telomeres; WD40 beta propeller superfamily member and ortholog of mammalian WDR5	0.0227637	0.0474462	0.213714	1.14416	1.20354	1.08839	0.174452	0.282385	0.331096
YBR176W	ECM31	Ketopantoate hydroxymethyltransferase, required for pantothenic acid biosynthesis, converts 2-oxoisovalerate into 2-dehydropantoate	-0.0106693	0.0231756	-0.009981	0.77167	0.790474	0.837388	-0.0899911	-0.203061	-0.164657
YBR177C	EHT1	Acyl-coenzymeA:ethanol O-acyltransferase that plays a minor role in medium-chain fatty acid ethyl ester biosynthesis; possesses short-chain esterase activity; localizes to lipid particles and the mitochondrial outer membrane	0.20023	0.224112	0.152799	0.348465	0.314142	0.35894	0.261323	0.246529	0.201674
YBR179C	FZO1	Mitofusin, mitochondrial integral membrane protein involved in mitochondrial fusion and mitochondrial genome maintenance; contains N-terminal GTPase domain; targeted for destruction by cytosolic components of the ubiquitin-proteasome system	-0.0639179	-0.152683	-0.000986	0.811106	0.764713	0.747369	-0.0429458	-0.171368	-0.134759
YBR185C	MBA1	Membrane-associated mitochondrial ribosome receptor; involved in assembly of mitochondrial respiratory complexes; may act as a receptor for proteins destined for export from the mitochondrial matrix to the inner membrane	-0.1372	-0.0311893	-0.209411	0.934518	0.918496	1.01023	-0.216244	-0.0779519	-0.119104
YBR187W	GDT1	Putative protein of unknown function; expression is reduced in a gcr1 null mutant; GFP-fusion protein localizes to the vacuole; expression pattern and physical interactions suggest a possible role in ribosome biogenesis	0.179202	0.275437	0.0212215	0.970179	0.9453	0.908883	0.132196	0.0598572	-0.0691197
YBR188C	NTC20	Member of the NineTeen Complex (NTC) that contains Prp19p and stabilizes U6 snRNA in catalytic forms of the spliceosome containing U2, U5, and U6 snRNAs	-0.0234165	-0.0280843	0.125539	0.488345	0.876403	0.717123	0.221389	0.158758	0.24354
YBR189W	RPS9B	Protein component of the small (40S) ribosomal subunit; nearly identical to Rps9Ap and has similarity to E. coli S4 and rat S9 ribosomal proteins	0.136513	0.146249	0.141449	0.317122	0.316487	0.25555	0.111809	0.0108172	0.0771194
YBR192W	RIM2	Mitochondrial pyrimidine nucleotide transporter; imports pyrimidine nucleoside triphosphates and exports pyrimidine nucleoside monophosphates; member of the mitochondrial carrier family	-0.0249127	-0.0897423	-0.002496	1.14394	0.953772	1.01526	-0.160649	-0.076425	-0.100009
YBR193C	MED8	Subunit of the RNA polymerase II mediator complex; associates with core polymerase subunits to form the RNA polymerase II holoenzyme; essential for transcriptional regulation	-0.0498753	-0.0736394	0.168339	0.224987	0.456384	0.477466	0.117534	0.0737917	0.231202
YBR194W	AIM4	Protein proposed to be associated with the nuclear pore complex; null mutant is viable, displays elevated frequency of mitochondrial genome loss and is sensitive to freeze-thaw stress	0.0344838	-0.0212109	0.0191489	0.220754	0.220865	0.174066	0.255586	0.262792	0.437919
YBR195C	MSI1	Subunit of chromatin assembly factor I (CAF-1), negative regulator of the RAS/cAMP pathway via sequestration of Npr1p kinase; localizes to the nucleus and cytoplasm; homologous to human retinoblastoma binding proteins RbAp48 and RbAp46	-0.0103906	0.17677	0.119784	0.815703	0.745936	0.900484	0.117114	0.0936347	0.0603279
YBR196C	PGI1	Glycolytic enzyme phosphoglucose isomerase, catalyzes the interconversion of glucose-6-phosphate and fructose-6-phosphate; required for cell cycle progression and completion of the gluconeogenic events of sporulation	-0.0016792	0.0441918	0.014999	0.800343	0.805682	0.890973	-0.025917	-0.104462	-0.0323956
YBR197C	YBR197C	Putative protein of unknown function; green fluorescent protein (GFP)-fusion protein localizes to the cytoplasm and nucleus; YBR197C is not an essential gene	-0.0327445	0.200785	-0.047471	1.20163	0.983598	1.1013	-0.325562	-0.0070986	-0.292311
YBR198C	TAF5	Subunit (90 kDa) of TFIID and SAGA complexes, involved in RNA polymerase II transcription initiation and in chromatin modification	-0.0143706	-0.00709402	-0.052726	0.738216	0.738015	0.767017	-0.090494	-0.0453705	-0.0731944
YBR199W	KTR4	Putative mannosyltransferase involved in protein glycosylation; member of the KRE2/MNT1 mannosyltransferase family	0.0379609	0.0469934	0.150987	0.749559	0.80442	0.79805	0.279261	0.287046	0.319675
YBR200W	BEM1	Protein containing SH3-domains, involved in establishing cell polarity and morphogenesis; functions as a scaffold protein for complexes that include Cdc24p, Ste5p, Ste20p, and Rsr1p	-0.0616099	-0.0474175	-0.036937	0.955254	0.956259	1.02759	0.0084505	0.0011576	-0.0975312
YBR202W	MCM7	Component of the hexameric MCM complex, which is important for priming origins of DNA replication in G1 and becomes an active ATP-dependent helicase that promotes DNA melting and elongation when activated by Cdc7p-Dbf4p in S-phase	-0.0016581	0.00114946	-0.019494	1.06267	1.16114	1.11212	-0.457955	-0.424349	-0.481713
YBR204C	YBR204C	Serine hydrolase; YBR204C is not an essential gene	0.0626869	0.00921587	0.0339393	1.08197	1.07207	1.04765	-0.0334832	-0.134802	-0.124575
YBR205W	KTR3	Putative alpha-1,2-mannosyltransferase involved in O- and N-linked protein glycosylation; member of the KRE2/MNT1 mannosyltransferase family	-0.0916489	0.0285627	0.121927	1.00343	0.851436	1.02183	-0.0689674	-0.105418	-0.186904
YBR207W	FTH1	Putative high affinity iron transporter involved in transport of intravacuolar stores of iron; forms complex with Fet5p; expression is regulated by iron; proposed to play indirect role in endocytosis	0.0949749	-0.0012886	0.133317	0.734867	0.350773	0.540615	-0.102746	-0.100488	-0.0746052
YBR208C	DUR1	Urea amidolyase, contains both urea carboxylase and allophanate hydrolase activities, degrades urea to CO2 and NH3; expression sensitive to nitrogen catabolite repression and induced by allophanate, an intermediate in allantoin degradation	-0.248289	-0.267158	-0.297581	1.02727	0.988752	1.01131	1.13847	1.2479	1.16221
YBR211C	AME1	Essential kinetochore protein associated with microtubules and spindle pole bodies; component of the kinetochore sub-complex COMA (Ctf19p, Okp1p, Mcm21p, Ame1p); involved in spindle checkpoint maintenance	-0.408382	-0.592613	-0.568203	-0.0824071	-0.095682	0.140106	-0.306854	-0.224689	-0.110986
YBR212W	NGR1	RNA binding protein that negatively regulates growth rate; interacts with the 3' UTR of the mitochondrial porin (POR1) mRNA and enhances its degradation; overexpression impairs mitochondrial function; expressed in stationary phase	-0.196418	-0.206683	-0.121148	0.84788	0.787809	0.825109	0.0197825	0.0036064	0.0312378
YBR213W	MET8	Bifunctional dehydrogenase and ferrochelatase, involved in the biosynthesis of siroheme, a prosthetic group used by sulfite reductase; required for sulfate assimilation and methionine biosynthesis	-0.0652909	-0.162232	-0.011354	0.586713	0.521705	0.537271	-0.239349	-0.419273	-0.284515
YBR214W	SDS24	One of two S. cerevisiae homologs (Sds23p and Sds24p) of the S. pombe Sds23 protein, which is implicated in APC/cyclosome regulation; involved in cell separation during budding; may play an indirect role in fluid-phase endocytosis	0.116526	0.0500777	0.0589146	1.1864	1.15856	1.19331	0.0849765	0.0850177	0.167213
YBR215W	HPC2	Subunit of the HIR complex, a nucleosome assembly complex involved in regulation of histone gene transcription; mutants display synthetic defects with subunits of FACT, a complex that allows passage of RNA Pol II through nucleosomes	-0.111019	-0.0310096	-0.05325	0.641382	0.625234	0.558604	-0.055593	-0.0027019	-0.0798467
YBR218C	PYC2	Pyruvate carboxylase isoform, cytoplasmic enzyme that converts pyruvate to oxaloacetate; highly similar to isoform Pyc1p but differentially regulated; mutations in the human homolog are associated with lactic acidosis	-0.208978	-0.222247	-0.29397	0.0359429	0.0085677	0.0262586	-0.449761	-0.448306	-0.49738
YBR221C	PDB1	E1 beta subunit of the pyruvate dehydrogenase (PDH) complex, which is an evolutionarily-conserved multi-protein complex found in mitochondria	-0.0835119	-0.0253171	-0.0412	0.206992	0.119145	0.195975	0.0069475	0.0245069	-0.0369375
YBR222C	PCS60	Peroxisomal protein that binds AMP and mRNA, localizes to both the peroxisomal peripheral membrane and matrix, expression is highly inducible by oleic acid, similar to E. coli long chain acyl-CoA synthetase	0.027987	0.0603282	0.021909	1.06646	1.00077	1.03465	-0.0431286	-0.063982	-0.0647556
YBR225W	YBR225W	Putative protein of unknown function; non-essential gene identified in a screen for mutants affected in mannosylphophorylation of cell wall components	0.0664946	0.1817	-0.026588	0.988214	0.724795	0.838948	0.0577265	0.023145	-0.111698
YBR227C	MCX1	Mitochondrial matrix protein; putative ATP-binding chaperone with non-proteolytic function; similar to bacterial ClpX proteins	-0.042199	-0.00646782	-0.086054	0.708163	0.725882	0.772161	0.0409505	-0.0163269	-0.0106861
YBR229C	ROT2	Glucosidase II catalytic subunit required for normal cell wall synthesis; mutations in rot2 suppress tor2 mutations, and are synthetically lethal with rot1 mutations	0.021585	-0.0994651	-0.059539	0.845887	0.911959	0.850144	-0.130814	-0.156418	-0.257082
YBR230C	OM14	Integral mitochondrial outer membrane protein; abundance is decreased in cells grown in glucose relative to other carbon sources; appears to contain 3 alpha-helical transmembrane segments; ORF encodes a 97-basepair intron	0.353288	0.221867	0.243092	1.33725	1.37949	1.30449	-0.3414	-0.514798	-0.371664
YBR231C	SWC5	Protein of unknown function, component of the SWR1 complex, which exchanges histone variant H2AZ (Htz1p) for chromatin-bound histone H2A	-0.046877	-0.125819	-0.001058	0.839381	0.821608	0.827605	0.140181	0.0209355	0.0408451
YBR233W	PBP2	RNA binding protein with similarity to mammalian heterogeneous nuclear RNP K protein, involved in the regulation of telomere position effect and telomere length	-0.0720159	-0.128278	-0.083991	0.861941	0.989151	0.850148	0.260494	0.160019	0.239917
YBR233W-A	DAD3	Essential subunit of the Dam1 complex (aka DASH complex), couples kinetochores to the force produced by MT depolymerization thereby aiding in chromosome segregation; is transferred to the kinetochore prior to mitosis	-0.316513	0.260597	-0.055694	-0.0156671	0.454587	0.266341	0.0833175	-0.0934791	-0.0277815
YBR234C	ARC40	Subunit of the ARP2/3 complex, which is required for the motility and integrity of cortical actin patches	0.166632	-0.00851751	0.03384	0.399264	0.26081	0.215112	0.20849	0.237826	0.174868
YBR235W	YBR235W	Putative ion transporter, similar to mammalian electroneutral Na(+)-(K+)-C1- cotransporter family; YBR235W is not an essential gene	0.0044068	-0.254613	-0.05239	0.940582	0.877146	0.871643	0.0370175	0.0495338	-0.0824647
YBR236C	ABD1	Methyltransferase, catalyzes the transfer of a methyl group from S-adenosylmethionine to the GpppN terminus of capped mRNA	-0.0805299	-0.0307757	0.0096663	0.82893	0.752367	0.890011	-0.0002395	0.0084069	-0.0291985
YBR237W	PRP5	RNA helicase in the DEAD-box family, necessary for prespliceosome formation, bridges U1 and U2 snRNPs and enables stable U2 snRNP association with intron RNA	-0.342753	-0.16994	-0.431687	-0.0553741	-0.22287	-0.12999	-0.547924	-0.529851	-0.551387
YBR238C	YBR238C	Mitochondrial membrane protein with similarity to Rmd9p; not required for respiratory growth but causes a synthetic respiratory defect in combination with rmd9 mutations; transcriptionally up-regulated by TOR; deletion increases life span	0.0175306	0.108992	0.0827139	0.485266	0.460643	0.409034	-0.201384	-0.0469449	-0.146391
YBR241C	YBR241C	Putative transporter, member of the sugar porter family; green fluorescent protein (GFP)-fusion protein localizes to the vacuolar membrane; YBR241C is not an essential gene	0.208653	0.024114	-0.147668	1.11872	1.13118	1.07056	-1.00695	-0.356395	-0.289714
YBR242W	YBR242W	Putative protein of unknown function; green fluorescent protein (GFP)-fusion protein localizes to the cytoplasm and nucleus; YBR242W is not an essential gene	-0.138737	-0.128802	-0.109013	0.715841	0.668954	0.778882	0.148308	0.174999	0.18836
YBR243C	ALG7	UDP-N-acetyl-glucosamine-1-P transferase, transfers Glc-Nac-P from UDP-GlcNac to Dol-P in the ER in the first step of the dolichol pathway of protein asparagine-linked glycosylation; inhibited by tunicamycin	-0.114726	0.267523	0.181639	1.78045	1.43208	1.17252	0.485499	0.430674	0.582309
YBR244W	GPX2	Phospholipid hydroperoxide glutathione peroxidase induced by glucose starvation that protects cells from phospholipid hydroperoxides and nonphospholipid peroxides during oxidative stress	0.0393651	0.104488	-0.008907	0.0778394	0.294907	0.356147	-0.610926	-0.467458	-0.657327
YBR245C	ISW1	Member of the imitation-switch (ISWI) class of ATP-dependent chromatin remodeling complexes; ATPase that forms a complex with Ioc2p and Ioc4p to regulate transcription elongation, and a complex with Ioc3p to repress transcription initiation	0.101113	0.00841224	-0.014531	1.00145	0.931563	1.00577	0.19238	0.247979	0.146459
YBR246W	RRT2	Putative protein of unknown function; non-essential gene identified in a screen for mutants with increased levels of rDNA transcription; null mutants display a weak carboxypeptidase Y missorting/secretion phenotype	0.0302027	-0.101589	0.0298543	0.88454	0.928549	1.02886	0.181732	0.0057318	0.16519
YBR247C	ENP1	Protein associated with U3 and U14 snoRNAs, required for pre-rRNA processing and 40S ribosomal subunit synthesis; localized in the nucleus and concentrated in the nucleolus	0.116136	0.147819	0.102234	0.939268	0.90805	0.953625	-0.0449281	-0.0908039	-0.100489
YBR248C	HIS7	Imidazole glycerol phosphate synthase (glutamine amidotransferase:cyclase), catalyzes the fifth and sixth steps of histidine biosynthesis and also produces 5-aminoimidazole-4-carboxamide ribotide (AICAR), a purine precursor	-0.250346	-0.199317	-0.212308	0.216198	0.138431	0.228454	-0.47997	-0.504824	-0.503191
YBR249C	ARO4	3-deoxy-D-arabino-heptulosonate-7-phosphate (DAHP) synthase, catalyzes the first step in aromatic amino acid biosynthesis and is feedback-inhibited by tyrosine or high concentrations of phenylalanine or tryptophan	-0.350422	-0.305648	-0.315646	0.382616	0.324029	0.388182	-0.510343	-0.534757	-0.562254
YBR251W	MRPS5	Mitochondrial ribosomal protein of the small subunit	-0.0858409	-0.142741	-0.031846	0.213898	0.187315	0.252944	-0.156592	-0.252282	-0.251792
YBR252W	DUT1	dUTPase, catalyzes hydrolysis of dUTP to dUMP and PPi, thereby preventing incorporation of uracil into DNA during replication; critical for the maintenance of genetic stability	0.0184588	-0.00912912	0.0200343	1.06122	0.998502	1.12027	-0.0261368	0.0495718	0.022653
YBR253W	SRB6	Subunit of the RNA polymerase II mediator complex; associates with core polymerase subunits to form the RNA polymerase II holoenzyme; essential for transcriptional regulation	-0.15705	-0.0412558	0.141095	0.648116	0.342548	0.283401	0.0454425	0.0458689	0.165185
YBR254C	TRS20	One of 10 subunits of the transport protein particle (TRAPP) complex of the cis-Golgi which mediates vesicle docking and fusion; mutations in the human homolog cause the spondyloepiphyseal dysplasia tarda (SEDL) disorder	0.0813938	-0.15879	0.222826	0.339362	0.334692	0.532389	0.461444	0.521699	0.773558
YBR255C-A	YBR255C-A	Putative protein of unknown function; may interact with respiratory chain complexes III (ubiquinol-cytochrome c reductase) or IV (cytochrome c oxidase); identified by sequence comparison with hemiascomycetous yeast species	0.0669274	-0.0537961	-0.236649	0.172879	0.179356	0.198685	-0.295532	-0.31844	-0.325567
YBR256C	RIB5	Riboflavin synthase; catalyzes the last step of the riboflavin biosynthesis pathway	-0.320034	-0.398626	-0.413169	0.310412	0.210905	0.287169	-0.552553	-0.512872	-0.428546
YBR257W	POP4	Subunit of both RNase MRP, which cleaves pre-rRNA, and nuclear RNase P, which cleaves tRNA precursors to generate mature 5' ends; binds to the RPR1 RNA subunit in RNase P	0.13423	0.161655	-0.009874	0.24113	0.29164	0.254844	0.335491	0.46623	0.314315
YBR258C	SHG1	Subunit of the COMPASS (Set1C) complex, which methylates histone H3 on lysine 4 and is required in transcriptional silencing near telomeres	-0.305855	-0.396077	-0.144629	0.0727093	0.331681	0.339415	0.104408	0.211669	0.130521
YBR260C	RGD1	GTPase-activating protein (RhoGAP) for Rho3p and Rho4p, possibly involved in control of actin cytoskeleton organization	-0.0342912	-0.0259517	0.0099173	0.719872	0.756473	0.805188	-0.0475359	0.0711207	-0.0564685
YBR261C	TAE1	AdoMet-dependent proline methyltransferase; catalyzes the dimethylation of ribosomal proteins Rpl12 and Rps25 at N-terminal proline residues; has a role in protein synthesis; fusion protein localizes to the cytoplasm	0.024595	0.00680928	-0.01899	0.877411	0.877668	0.963139	0.0851995	-0.0384408	0.0732848
YBR262C	AIM5	Protein of unknown function; the authentic, non-tagged protein is detected in purified mitochondria in high-throughput studies; null mutant displays elevated frequency of mitochondrial genome loss	-0.200076	-0.238937	-0.25011	0.365427	0.363628	0.444633	-0.272451	-0.216519	-0.292376
YBR263W	SHM1	Mitochondrial serine hydroxymethyltransferase, converts serine to glycine plus 5,10 methylenetetrahydrofolate; involved in generating precursors for purine, pyrimidine, amino acid, and lipid biosynthesis; reverse reaction generates serine	-0.0562171	-0.00332112	-0.049118	0.831861	0.69678	0.847083	-0.220784	-0.190612	-0.241745
YBR264C	YPT10	Rab family GTP-binding protein that contains the PEST signal sequence specific for proteolytic enzymes; may be involved in vesicular transport; overexpression leads to accumulation of Golgi-like cisternae with budding vesicles	0.0140663	0.111475	0.0179411	0.895257	0.807331	0.944882	0.216194	0.342733	0.285351
YBR265W	TSC10	3-ketosphinganine reductase, catalyzes the second step in phytosphingosine synthesis, essential for growth in the absence of exogenous dihydrosphingosine or phytosphingosine, member of short chain dehydrogenase/reductase protein family	0.109744	-0.0190064	0.0754153	0.898918	0.86837	0.794814	0.0915855	0.0446492	0.168613
YBR267W	REI1	Cytoplasmic pre-60S factor; required for the correct recycling of shuttling factors Alb1, Arx1 and Tif6 at the end of the ribosomal large subunit biogenesis; involved in bud growth in the mitotic signaling network	0.124567	0.116436	0.173084	0.854493	0.83986	0.8961	-0.136081	-0.121775	-0.137366
YBR268W	MRPL37	Mitochondrial ribosomal protein of the large subunit	-0.129399	-0.059352	0.0170137	0.315284	0.425377	0.452931	-0.0331599	-0.0672912	0.0887774
YBR271W	YBR271W	Putative S-adenosylmethionine-dependent methyltransferase of the seven beta-strand family; green fluorescent protein (GFP)-fusion protein localizes to the cytoplasm; predicted to be involved in ribosome biogenesis	0.026767	0.0840675	0.114707	1.1288	1.01237	0.99234	0.128136	0.111005	0.113907
YBR272C	HSM3	Proteasome-interacting protein involved in the assembly of the base subcomplex of the 19S proteasomal regulatory particle (RP); involved in DNA mismatch repair during slow growth; weak similarity to Msh1p; related to human 19S subunit S5b	-0.109629	-0.0468159	0.0518175	1.10373	1.13764	0.915287	0.0562635	0.111736	0.080696
YBR273C	UBX7	UBX (ubiquitin regulatory X) domain-containing protein that interacts with Cdc48p	0.0208264	-0.0107666	0.029424	0.96752	0.941533	0.786362	-0.029716	0.329025	0.284475
YBR274W	CHK1	Serine/threonine kinase and DNA damage checkpoint effector, mediates cell cycle arrest via phosphorylation of Pds1p; phosphorylated by checkpoint signal transducer Mec1p; homolog of S. pombe and mammalian Chk1 checkpoint kinase	-0.0586618	-0.00347772	-0.168096	0.157522	0.277594	0.255997	-0.0149594	0.0391633	0.00093279
YBR275C	RIF1	Protein that binds to the Rap1p C-terminus and acts synergistically with Rif2p to help control telomere length and establish telomeric silencing; deletion results in telomere elongation	0.0929113	-0.0932691	0.128931	1.06049	0.978626	0.950646	0.138277	0.143865	0.170149
YBR278W	DPB3	Third-largest subunit of DNA polymerase II (DNA polymerase epsilon), required to maintain fidelity of chromosomal replication and also for inheritance of telomeric silencing; mRNA abundance peaks at the G1/S boundary of the cell cycle	0.0126968	-0.0129733	0.130715	0.447206	0.566011	0.587632	0.212972	0.146004	0.108009
YBR279W	PAF1	Component of the Paf1p complex that binds to and modulates the activity of RNA polymerases I and II; required for expression of a subset of genes, including cell cycle-regulated genes; homolog of human PD2/hPAF1	-0.0720329	-0.0332693	-0.033537	0.115867	0.0589654	0.250002	0.0921455	0.0986647	0.0271954
YBR280C	SAF1	F-Box protein involved in proteasome-dependent degradation of Aah1p during entry of cells into quiescence; interacts with Skp1	0.0823144	0.0347298	0.0281316	0.766996	0.723855	0.447797	-0.103336	0.0007365	-0.0071472
YBR281C	DUG2	Probable di- and tri-peptidase; forms a complex with Dug1p and Dug3p to degrade glutathione (GSH) and other peptides containing a gamma-glu-X bond in an alternative pathway to GSH degradation by gamma-glutamyl transpeptidase (Ecm38p)	-0.0873969	-0.0497673	-0.101705	0.968884	0.998023	0.973656	0.216482	0.223046	0.251383
YBR282W	MRPL27	Mitochondrial ribosomal protein of the large subunit	-0.0672579	-0.228723	-0.141794	0.164559	0.138525	0.131512	-0.0747518	-0.191398	-0.244853
YBR283C	SSH1	Subunit of the Ssh1 translocon complex; Sec61p homolog involved in co-translational pathway of protein translocation; not essential	0.039983	-0.167442	-0.176807	1.19844	0.815435	1.07361	-0.0502864	-0.125054	-0.136472
YBR286W	APE3	Vacuolar aminopeptidase Y, processed to mature form by Prb1p	-0.049951	0.0329715	0.007714	0.931824	0.827649	1.01897	-0.380328	-0.438012	-0.494961
YBR287W	YBR287W	Protein of unknown function; green fluorescent protein (GFP)-fusion protein localizes to the ER; YBR287W is not an essential gene	0.188154	0.0663481	0.0925053	1.16147	1.08036	1.13968	-0.521235	-0.509448	-0.465359
YBR288C	APM3	Mu3-like subunit of the clathrin associated protein complex (AP-3); functions in transport of alkaline phosphatase to the vacuole via the alternate pathway	0.0400792	-0.00691702	0.120427	0.833068	0.907584	0.812081	0.412003	0.365231	0.280385
YBR289W	SNF5	Subunit of the SWI/SNF chromatin remodeling complex involved in transcriptional regulation; functions interdependently in transcriptional activation with Snf2p and Snf6p	0.074821	0.0457993	0.0470002	0.902244	0.937077	0.929788	0.140205	0.177931	0.0737306
YBR290W	BSD2	Heavy metal ion homeostasis protein, facilitates trafficking of Smf1p and Smf2p metal transporters to the vacuole where they are degraded, controls metal ion transport, prevents metal hyperaccumulation, functions in copper detoxification	0.102526	0.199198	0.114339	1.06262	0.944017	0.887719	0.0252465	-0.004927	-0.132331
YBR291C	CTP1	Mitochondrial inner membrane citrate transporter, member of the mitochondrial carrier family	0.0292846	-0.288342	-0.257525	0.234763	0.474282	0.473626	1.93879	1.67462	1.79575
YBR296C	PHO89	Na+/Pi cotransporter, active in early growth phase; similar to phosphate transporters of Neurospora crassa; transcription regulated by inorganic phosphate concentrations and Pho4p	0.688669	0.530407	0.453256	0.0667537	-0.0070454	0.176523	-0.425716	-0.651651	-0.60618
YCL001W	RER1	Protein involved in retention of membrane proteins, including Sec12p, in the ER; localized to Golgi; functions as a retrieval receptor in returning membrane proteins to the ER	0.0543603	0.0476473	-0.030716	-0.00715505	-0.154068	-0.0184692	-0.0611384	-0.0372867	-0.0077603
YCL005W-A	VMA9	Vacuolar H+ ATPase subunit e of the V-ATPase V0 subcomplex; essential for vacuolar acidification; interacts with the V-ATPase assembly factor Vma21p in the ER; involved in V0 biogenesis	0.140873	-0.141111	-0.304064	-0.537036	0.0916227	-0.00384235	0.0831185	-0.236028	-0.0765761
YCL008C	STP22	Component of the ESCRT-I complex, which is involved in ubiquitin-dependent sorting of proteins into the endosome; homologous to the mouse and human Tsg101 tumor susceptibility gene; mutants exhibit a Class E Vps phenotype	0.0707188	-0.0191782	0.0099907	0.0245016	0.219922	-0.075613	-0.0047225	0.0709317	0.157165
YCL009C	ILV6	Regulatory subunit of acetolactate synthase, which catalyzes the first step of branched-chain amino acid biosynthesis; enhances activity of the Ilv2p catalytic subunit, localizes to mitochondria	-0.213614	-0.204207	-0.208258	-0.421136	-0.400679	-0.399238	-0.291393	-0.373902	-0.336029
YCL010C	SGF29	Probable subunit of SAGA histone acetyltransferase complex	0.0379062	-0.140807	4.5e-05	-0.0609521	0.12881	-0.060852	0.0071555	-0.0971677	0.0315895
YCL011C	GBP2	Poly(A+) RNA-binding protein, involved in the export of mRNAs from the nucleus to the cytoplasm; similar to Hrb1p and Npl3p; also binds single-stranded telomeric repeat sequence in vitro	0.0649174	0.0266744	0.0644579	0.0763504	0.113182	0.122299	0.148024	0.124644	0.130387
YCL012C	YCL012C	Putative protein of unknown function; orthologs are present in S. bayanus, S. paradoxus and Ashbya gossypii; YCL012C is not an essential gene	0.0480978	0.0971454	0.163436	-0.227477	0.190372	0.0808379	-0.234321	-0.300318	-0.268378
YCL014W	BUD3	Protein involved in bud-site selection and required for axial budding pattern; localizes with septins to bud neck in mitosis and may constitute an axial landmark for next round of budding	0.0277972	-0.0442008	0.0469982	0.107514	0.0395052	0.09208	0.0253285	0.136597	0.151413
YCL016C	DCC1	Subunit of a complex with Ctf8p and Ctf18p that shares some components with Replication Factor C, required for sister chromatid cohesion and telomere length maintenance	-0.0693549	-0.127647	-0.093585	-0.0649791	-0.065181	-0.166879	0.187112	0.128198	0.173019
YCL017C	NFS1	Cysteine desulfurase involved in iron-sulfur cluster (Fe/S) biogenesis and in thio-modification of mitochondrial and cytoplasmic tRNAs; essential protein located predominantly in mitochondria	-0.0662999	-0.0883392	-0.010552	-0.307221	-0.287925	-0.192639	0.0632485	0.154725	0.0708114
YCL024W	KCC4	Protein kinase of the bud neck involved in the septin checkpoint, associates with septin proteins, negatively regulates Swe1p by phosphorylation, shows structural homology to bud neck kinases Gin4p and Hsl1p	-0.0101322	-0.0616401	-0.103365	-0.087362	-0.062656	-0.104494	-0.252343	-0.198794	-0.165018
YCL025C	AGP1	Low-affinity amino acid permease with broad substrate range, involved in uptake of asparagine, glutamine, and other amino acids; expression is regulated by the SPS plasma membrane amino acid sensor system (Ssy1p-Ptr3p-Ssy5p)	-0.0945559	-0.256094	-0.237584	-0.118535	-0.285446	-0.240539	0.707357	0.491943	0.584577
YCL026C-B	HBN1	Putative protein of unknown function; similar to bacterial nitroreductases; green fluorescent protein (GFP)-fusion protein localizes to the cytoplasm and nucleus; protein becomes insoluble upon intracellular iron depletion	0.54683	0.216893	0.196054	0.287384	0.277569	0.293261	0.29172	0.17395	0.27633
YCL028W	RNQ1	[PIN(+)] prion, an infectious protein conformation that is generally an ordered protein aggregate	-0.191787	-0.0784747	-0.170557	-0.0500971	-0.151604	0.0285088	-0.0015305	-0.0070148	0.0099892
YCL029C	BIK1	Microtubule-associated protein, component of the interface between microtubules and kinetochore, involved in sister chromatid separation; essential in polyploid cells but not in haploid or diploid cells; ortholog of mammalian CLIP-170	0.0112258	0.0245671	-0.030287	0.0123419	-0.058761	0.0253461	0.239462	0.253452	0.254875
YCL030C	HIS4	Multifunctional enzyme containing phosphoribosyl-ATP pyrophosphatase, phosphoribosyl-AMP cyclohydrolase, and histidinol dehydrogenase activities; catalyzes the second, third, ninth and tenth steps in histidine biosynthesis	-0.359138	-0.315087	-0.380366	-1.14955	-1.12046	-1.14835	-0.986575	-1.01834	-1.0497
YCL031C	RRP7	Essential protein involved in rRNA processing and ribosome biogenesis	0.0105734	0.0169826	-0.032839	-0.00901805	0.0125031	-0.00717285	-0.0589153	-0.13414	0.0105649
YCL032W	STE50	Protein involved in mating response, invasive/filamentous growth, and osmotolerance, acts as an adaptor that links G protein-associated Cdc42p-Ste20p complex to the effector Ste11p to modulate signal transduction	-0.0446331	-0.0917061	-0.152294	-0.0439351	-0.14573	-0.0352447	0.18601	0.210862	0.341171
YCL033C	MXR2	Methionine-R-sulfoxide reductase, involved in the response to oxidative stress; protects iron-sulfur clusters from oxidative inactivation along with MXR1; involved in the regulation of lifespan	0.173999	0.172095	0.229314	0.389198	0.2306	0.414055	0.125796	0.0750067	0.226486
YCL034W	LSB5	Protein of unknown function; binds Las17p, which is a homolog of human Wiskott-Aldrich Syndrome protein involved in actin patch assembly and actin polymerization; may mediate disassembly of the Pan1 complex from the endocytic coat	-0.0433767	-0.0305542	0.0743114	0.183763	0.223395	0.0910789	0.345456	0.354711	0.370087
YCL035C	GRX1	Hydroperoxide and superoxide-radical responsive heat-stable glutathione-dependent disulfide oxidoreductase with active site cysteine pair; protects cells from oxidative damage	-0.0829679	-0.248658	-0.369303	0.00138285	0.0502796	-0.0472606	-0.532309	-1.60679	-0.486332
YCL036W	GFD2	Protein of unknown function, identified as a high-copy suppressor of a dbp5 mutation	0.138813	0.16865	0.137171	-0.241352	-0.102561	0.0983797	0.139608	0.227883	0.15922
YCL037C	SRO9	Cytoplasmic RNA-binding protein that associates with translating ribosomes; involved in heme regulation of Hap1p as a component of the HMC complex, also involved in the organization of actin filaments; contains a La motif	-0.0429563	0.0586858	-0.073867	0.0401635	-0.049663	0.0390904	-0.0118882	-0.0164473	-0.0502161
YCL039W	GID7	Protein of unknown function, involved in proteasome-dependent catabolite inactivation of fructose-1,6-bisphosphatase; contains six WD40 repeats; computational analysis suggests that Gid7p and Moh1p have similar functions	0.0618383	-0.215616	-0.042605	-0.121784	-0.053993	-0.0113858	-0.531741	-0.441919	-0.364468
YCL040W	GLK1	Glucokinase, catalyzes the phosphorylation of glucose at C6 in the first irreversible step of glucose metabolism; one of three glucose phosphorylating enzymes; expression regulated by non-fermentable carbon sources	0.192447	0.11396	0.0658447	-0.0576281	-0.049724	0.0307924	-0.690805	-0.705564	-0.711616
YCL043C	PDI1	Protein disulfide isomerase, multifunctional protein resident in the endoplasmic reticulum lumen, essential for the formation of disulfide bonds in secretory and cell-surface proteins, unscrambles non-native disulfide bonds	0.129692	0.168901	0.0894607	0.297972	0.202952	0.32204	-0.0485706	-0.0382165	-0.0548598
YCL044C	MGR1	Subunit of the mitochondrial (mt) i-AAA protease supercomplex, which degrades misfolded mitochondrial proteins; forms a subcomplex with Mgr3p that binds to substrates to facilitate proteolysis; required for growth of cells lacking mtDNA	-0.0923289	-0.0613133	-0.096239	0.012699	0.0323935	0.0171934	0.0551225	0.0623852	0.0773104
YCL045C	EMC1	Member of a transmembrane complex required for efficient folding of proteins in the ER; null mutant displays induction of the unfolded protein response; interacts with Gal80p	-0.0404825	0.00802258	-0.109105	0.00453655	0.0033607	0.0127007	-0.103759	-0.0511945	-0.0670432
YCL047C	YCL047C	Putative protein of unknown function	0.0094583	0.050577	0.006457	-0.0741391	-0.118107	-0.0154176	-0.0493325	-0.0122989	-0.0243805
YCL049C	YCL049C	Protein of unknown function; localizes to membrane fraction; YCL049C is not an essential gene	-0.0636929	-0.0893296	0.167715	0.533542	0.462879	0.741264	1.30349	1.34711	1.29464
YCL050C	APA1	Diadenosine 5',5''-P1,P4-tetraphosphate phosphorylase I (AP4A phosphorylase), involved in catabolism of bis(5'-nucleosidyl) tetraphosphates; has similarity to Apa2p	-0.0508735	0.142573	0.121102	-0.457636	-0.229203	-0.183403	0.135691	0.161352	0.24127
YCL051W	LRE1	Protein involved in control of cell wall structure and stress response; inhibits Cbk1p protein kinase activity; overproduction confers resistance to cell-wall degrading enzymes	-0.0933779	-0.0656085	-0.122861	-0.0569401	-0.135476	-0.0759047	-0.327561	-0.142876	-0.387344
YCL052C	PBN1	Essential component of glycosylphosphatidylinositol-mannosyltransferase I, required for the autocatalytic post-translational processing of the protease B precursor Prb1p, localizes to ER in lumenal orientation; homolog of mammalian PIG-X	0.0872044	0.000468555	0.0154794	0.349433	0.223486	0.253956	0.233458	0.215611	0.27377
YCL054W	SPB1	AdoMet-dependent methyltransferase involved in rRNA processing and 60S ribosomal subunit maturation; methylates G2922 in the tRNA docking site of the large subunit rRNA and in the absence of snR52, U2921; suppressor of PAB1 mutants	0.134585	0.13255	0.049366	0.0251374	0.0275632	0.0570387	-0.146539	-0.123869	-0.141591
YCL057C-A	YCL057C-A	Putative protein of unknown function; the authentic, non-tagged protein is detected in highly purified mitochondria in high-throughput studies	0.127147	-0.0100262	0.0165165	-0.0669441	0.0165818	-0.0845992	-0.0632184	-0.150503	-0.048674
YCL057W	PRD1	Zinc metalloendopeptidase, found in the cytoplasm and intermembrane space of mitochondria; with Cym1p, involved in degradation of mitochondrial proteins and of presequence peptides cleaved from imported proteins	0.0347216	0.0174957	-0.018783	0.178605	0.15579	0.215044	-0.210757	-0.229541	-0.209776
YCL058W-A	YCL058W-A	Transcriptional repressor encoded by the antisense strand of the FYV5 gene; negatively regulates transcription of FYV5 by binding to the promoter on the sense strand	0.297893	0.262721	0.181111	0.05317	0.91928	-0.110153	0.0313255	-0.0495043	0.0568539
YCL059C	KRR1	Essential nucleolar protein required for the synthesis of 18S rRNA and for the assembly of 40S ribosomal subunit	0.0004638	0.0701692	0.0601875	-0.138991	-0.183913	-0.153054	0.0115355	-0.011602	-0.0092632
YCL061C	MRC1	S-phase checkpoint protein required for DNA replication; interacts with and stabilizes Pol2p at stalled replication forks during stress, where it forms a pausing complex with Tof1p and is phosphorylated by Mec1p; protects uncapped telomeres	-0.167966	-0.114838	-0.275896	-0.216916	-0.143848	-0.326892	0.0694245	-0.0103811	0.0633055
YCL064C	CHA1	Catabolic L-serine (L-threonine) deaminase, catalyzes the degradation of both L-serine and L-threonine; required to use serine or threonine as the sole nitrogen source, transcriptionally induced by serine and threonine	1.03183	1.19793	1.19559	-0.746399	-0.770559	-0.718496	-1.51136	-1.60517	-1.53414
YCR002C	CDC10	Component of the septin ring of the mother-bud neck that is required for cytokinesis; septins recruit proteins to the neck and can act as a barrier to diffusion at the membrane, and they comprise the 10nm filaments seen with EM	-0.106989	-0.0385894	-0.085967	-0.0229901	-0.121076	-0.0835532	0.189674	0.167755	0.162068
YCR004C	YCP4	Protein of unknown function, has sequence and structural similarity to flavodoxins; predicted to be palmitoylated; the authentic, non-tagged protein is detected in highly purified mitochondria in high-throughput studies	-0.125112	-0.0243147	-0.051119	-0.0456111	-0.118741	-0.0192533	-0.263991	-0.241811	-0.32968
YCR005C	CIT2	Citrate synthase, catalyzes the condensation of acetyl coenzyme A and oxaloacetate to form citrate, peroxisomal isozyme involved in glyoxylate cycle; expression is controlled by Rtg1p and Rtg2p transcription factors	-0.256484	-0.249544	-0.215715	0.29071	0.239747	0.308461	0.0865755	0.110827	0.0668206
YCR008W	SAT4	Ser/Thr protein kinase involved in salt tolerance; funtions in regulation of Trk1p-Trk2p potassium transporter; partially redundant with Hal5p; has similarity to Npr1p	0.269735	0.0178644	0.0133488	-0.198698	-0.176742	-0.161507	-0.289436	-0.322639	-0.347768
YCR009C	RVS161	Amphiphysin-like lipid raft protein; interacts with Rvs167p and regulates polarization of the actin cytoskeleton, endocytosis, cell polarity, cell fusion and viability following starvation or osmotic stress	-0.0177646	0.0579583	-0.021021	-0.0640311	-0.079624	0.00085005	0.103065	0.101103	0.163765
YCR011C	ADP1	Putative ATP-dependent permease of the ABC transporter family of proteins	0.0293818	-0.187468	-0.123983	-0.0117151	-0.105767	-0.114094	0.0539635	0.0136969	0.106845
YCR012W	PGK1	3-phosphoglycerate kinase, catalyzes transfer of high-energy phosphoryl groups from the acyl phosphate of 1,3-bisphosphoglycerate to ADP to produce ATP; key enzyme in glycolysis and gluconeogenesis	-0.0326871	0.00700388	-0.061395	-0.0222061	-0.068913	-0.0408704	-0.133308	-0.0961815	-0.0801937
YCR015C	YCR015C	Putative protein of unknown function; YCR015C is not an essential gene	-0.0932009	-0.0308457	0.0967236	-0.14666	0.0427165	-0.124138	-0.0686974	0.0721797	-0.110559
YCR016W	YCR016W	Putative protein of unknown function; green fluorescent protein (GFP)-fusion protein localizes to the nucleolus and nucleus; predicted to be involved in ribosome biogenesis	0.0492042	0.0822896	0.0299327	-0.257019	-0.182261	-0.192041	0.0989605	0.0934067	0.0760769
YCR017C	CWH43	Putative sensor/transporter protein involved in cell wall biogenesis; contains 14-16 transmembrane segments and several putative glycosylation and phosphorylation sites; null mutation is synthetically lethal with pkc1 deletion	-0.0158536	-0.131723	-0.17537	0.208668	0.138051	0.0772258	0.321611	0.43741	0.283403
YCR019W	MAK32	Protein necessary for structural stability of L-A double-stranded RNA-containing particles	-0.245372	-0.102279	-0.092639	0.101656	-0.048536	0.0416294	-0.111457	0.059146	0.208928
YCR020C-A	MAK31	Non-catalytic subunit of N-terminal acetyltransferase of the NatC type; required for replication of dsRNA virus; member of the Sm protein family	0.094295	0.354644	0.233149	0.371295	0.468626	0.482716	0.924929	0.967515	1.00776
YCR020W-B	HTL1	Component of the RSC chromatin remodeling complex; RSC functions in transcriptional regulation and elongation, chromosome stability, and establishing sister chromatid cohesion; involved in telomere maintenance	-0.0644919	-0.0354846	0.0469278	-0.0902531	0.0965049	0.121648	0.210909	0.170922	0.0950253
YCR023C	YCR023C	Vacuolar membrane protein of unknown function; member of the multidrug resistance family; YCR023C is not an essential gene	0.186175	-0.440582	-0.67475	-0.791698	-0.378851	-0.0518788	-0.19266	0.322706	-0.13152
YCR024C	SLM5	Mitochondrial asparaginyl-tRNA synthetase	-0.0343961	-0.0134008	-0.128521	0.174951	-0.108373	-0.151886	-0.334654	-0.301091	-0.281385
YCR026C	NPP1	Nucleotide pyrophosphatase/phosphodiesterase family member; mediates extracellular nucleotide phosphate hydrolysis along with Npp2p and Pho5p; activity and expression enhanced during conditions of phosphate starvation	-0.325383	-0.366125	-0.215781	-0.309339	-0.39422	-0.404333	-0.381838	-0.312493	-0.247737
YCR027C	RHB1	Putative Rheb-related GTPase involved in regulating canavanine resistance and arginine uptake; member of the Ras superfamily of G-proteins	0.0014965	-0.0562348	-0.175842	-0.0550151	-0.128867	0.00144445	0.170583	0.23629	0.192347
YCR028C-A	RIM1	Single-stranded DNA-binding protein essential for mitochondrial genome maintenance; involved in mitochondrial DNA replication	0.0269839	-0.0551118	-0.001809	0.14571	-0.0055061	0.119353	0.0295705	0.0439896	-0.0146113
YCR030C	SYP1	Protein of unknown function that is involved in endocytic site formation; may regulate assembly and disassembly of the septin ring; colocalizes and interacts with septin subunits; potential role in actin cytoskeletal organization	0.0604631	0.0396436	0.0145022	0.109543	0.0239948	0.0730619	0.170854	0.265863	0.197811
YCR033W	SNT1	Subunit of the Set3C deacetylase complex that interacts directly with the Set3C subunit, Sif2p; putative DNA-binding protein; mutant has increased aneuploidy tolerance	-0.0295759	-0.0497319	0.084194	-0.0652831	0.0047988	-0.0522572	0.0354435	0.242739	0.154999
YCR034W	FEN1	Fatty acid elongase, involved in sphingolipid biosynthesis; acts on fatty acids of up to 24 carbons in length; mutations have regulatory effects on 1,3-beta-glucan synthase, vacuolar ATPase, and the secretory pathway	0.171359	0.0325447	0.0360849	0.344886	0.602965	0.279376	0.389815	0.217001	0.314579
YCR035C	RRP43	Exosome non-catalytic core component; involved in 3'-5' RNA processing and degradation in both the nucleus and the cytoplasm; has similarity to E. coli RNase PH and to human hRrp43p (OIP2, EXOSC8)	0.102294	0.0883875	0.0475038	-0.0234951	0.0344156	-0.0384373	0.18122	0.205505	0.23848
YCR036W	RBK1	Putative ribokinase	0.0560605	0.023871	0.0590793	0.130006	0.181467	0.206556	0.17706	0.145466	0.20644
YCR037C	PHO87	Low-affinity inorganic phosphate (Pi) transporter, involved in activation of PHO pathway; expression is independent of Pi concentration and Pho4p activity; contains 12 membrane-spanning segments	-0.11655	-0.0482363	-0.281707	0.0708707	-0.169748	-0.102909	-0.0793098	-0.0978179	-0.0622914
YCR042C	TAF2	TFIID subunit (150 kDa), involved in RNA polymerase II transcription initiation	-0.0384364	-0.149362	-0.200571	-0.0422721	-0.104506	-0.0276399	0.389286	0.397719	0.348867
YCR043C	YCR043C	Putative protein of unknown function; green fluorescent protein (GFP)-fusion protein localizes to the Golgi apparatus; YCR043C is not an essential gene	-0.0842299	-0.0146935	0.0630708	0.013994	-0.0104642	-0.0795953	0.305392	0.187463	0.280255
YCR044C	PER1	Protein of the endoplasmic reticulum, required for GPI-phospholipase A2 activity that remodels the GPI anchor as a prerequisite for association of GPI-anchored proteins with lipid rafts; functionally complemented by human ortholog PERLD1	-0.311135	0.0691599	-0.103547	0.0706193	0.131733	0.109799	-0.0163437	-0.0751339	-0.0271853
YCR046C	IMG1	Mitochondrial ribosomal protein of the large subunit, required for respiration and for maintenance of the mitochondrial genome	-0.0216298	-0.0241475	-0.091142	0.0838917	0.0195365	0.113747	-0.0745247	-0.077727	-0.0783306
YCR047C	BUD23	Methyltransferase, methylates residue G1575 of 18S rRNA; required for rRNA processing and nuclear export of 40S ribosomal subunits independently of methylation activity; diploid mutant displays random budding pattern	0.2909	0.0959974	0.354083	0.141926	0.0818448	-0.0112027	0.275155	0.188743	0.26307
YCR048W	ARE1	Acyl-CoA:sterol acyltransferase, isozyme of Are2p; endoplasmic reticulum enzyme that contributes the major sterol esterification activity in the absence of oxygen	2.47423	1.42473	1.15756	1.64433	1.91605	0.828141	3.00897	1.05562	1.91213
YCR051W	YCR051W	Putative protein of unknown function; green fluorescent protein (GFP)-fusion protein localizes to the cytoplasm and nucleus; contains ankyrin (Ank) repeats; YCR051W is not an essential gene	-0.0944869	0.152168	0.206691	0.146808	0.321738	0.217403	0.151439	-0.102674	0.264669
YCR052W	RSC6	Component of the RSC chromatin remodeling complex; essential for mitotic growth; homolog of SWI/SNF subunit Swp73p	-0.0518721	-0.0366353	-0.044494	0.0237436	-0.017529	0.0804793	0.102991	0.112845	0.116135
YCR053W	THR4	Threonine synthase, conserved protein that catalyzes formation of threonine from O-phosphohomoserine; expression is regulated by the GCN4-mediated general amino acid control pathway	-0.0186249	0.0434531	-0.04955	-0.407907	-0.333413	-0.25559	0.163827	-0.0446678	0.191612
YCR054C	CTR86	Essential protein of unknown function; upstream region contains a Gcn4p responsive site suggesting a possible role in amino acid biosynthesis	0.198976	0.00304257	0.0535192	-0.0710221	-0.040361	-0.100593	0.111233	-0.068661	0.0536054
YCR057C	PWP2	Conserved 90S pre-ribosomal component essential for proper endonucleolytic cleavage of the 35 S rRNA precursor at A0, A1, and A2 sites; contains eight WD-repeats; PWP2 deletion leads to defects in cell cycle and bud morphogenesis	0.0993525	0.0547998	0.0732236	-0.0173051	0.0774031	-0.0812043	0.133211	0.23062	0.230069
YCR060W	TAH1	HSP90 cofactor; interacts with Hsp82p, Pih1p, Rvb1 and Rvb2, contains a single TPR domain with at least two TPR motifs	-0.0684819	-0.0841801	-0.221938	-0.294802	-0.235914	-0.210512	0.290726	0.1537	0.272455
YCR061W	YCR061W	Protein of unknown function; green fluorescent protein (GFP)-fusion protein localizes to the cytoplasm in a punctate pattern; induced by treatment with 8-methoxypsoralen and UVA irradiation	0.354516	-0.0455231	-0.053716	0.289892	0.124381	0.152504	0.385945	0.33991	0.285565
YCR063W	BUD31	Component of the SF3b subcomplex of the U2 snRNP; diploid mutants display a random budding pattern instead of the wild-type bipolar pattern	-0.0109061	0.0892987	0.0280759	-0.0112511	-0.028138	-0.00943215	-0.114662	-0.0878077	0.00173833
YCR066W	RAD18	E3 ubiqutin ligase, forms heterodimer with Rad6p to monoubiquitinate PCNA-K164; heterodimer binds single-stranded DNA and has single-stranded DNA dependent ATPase activity; required for postreplication repair	0.0705228	-0.137138	-0.038004	0.202004	0.156407	0.0101477	-0.0456148	0.0660037	0.154315
YCR067C	SED4	Integral endoplasmic reticulum membrane protein, functions as a positive regulator of Sar1p probably through inhibition of GTPase activation by Sec23p; binds Sec16p, participates in vesicle formation, similar to Sec12p	0.155349	0.0758449	0.0837886	0.244887	0.443268	0.216655	0.305721	0.252012	0.363905
YCR069W	CPR4	Peptidyl-prolyl cis-trans isomerase (cyclophilin), catalyzes the cis-trans isomerization of peptide bonds N-terminal to proline residues; has a potential role in the secretory pathway	0.287519	0.264755	0.222496	0.327841	0.465361	0.442835	0.617769	0.473889	0.373932
YCR071C	IMG2	Mitochondrial ribosomal protein of the large subunit	-0.168014	-0.201142	-0.249084	-0.00498785	-0.0083721	0.0417295	-0.0631587	-0.0443334	-0.0540449
YCR072C	RSA4	WD-repeat protein involved in ribosome biogenesis; may interact with ribosomes; required for maturation and efficient intra-nuclear transport or pre-60S ribosomal subunits, localizes to the nucleolus	0.0350499	0.167955	0.0804384	0.129668	0.0332256	0.097419	-0.0163053	-0.0811304	-0.147566
YCR073W-A	SOL2	Protein with a possible role in tRNA export; shows similarity to 6-phosphogluconolactonase non-catalytic domains but does not exhibit this enzymatic activity; homologous to Sol1p, Sol3p, and Sol4p	-0.0615619	-0.0474985	-0.02584	-0.118343	-0.10549	-0.115203	0.454294	0.538193	0.433199
YCR075W-A	YCR075W-A	Putative protein of unknown function; identified by homology to Ashbya gossypii	-0.231475	-0.110952	-0.05486	0.603167	0.256883	0.280041	0.246349	0.213954	0.293656
YCR076C	YCR076C	Putative protein of unknown function; YCR076C is not an essential gene	-0.236253	0.0668506	-0.125799	-0.47463	-0.402415	-0.430131	-0.1558	-0.198434	-0.122276
YCR077C	PAT1	Topoisomerase II-associated deadenylation-dependent mRNA-decapping factor; also required for faithful chromosome transmission, maintenance of rDNA locus stability, and protection of mRNA 3'-UTRs from trimming; functionally linked to Pab1p	-0.0198321	-0.0267545	-0.058588	0.0218807	0.0181806	0.0222467	-0.17202	-0.175149	-0.188839
YCR081W	SRB8	Subunit of the RNA polymerase II mediator complex; associates with core polymerase subunits to form the RNA polymerase II holoenzyme; essential for transcriptional regulation; involved in glucose repression	0.121641	-0.253022	0.0586867	-0.0490301	0.0279698	0.125867	-0.193606	-0.101579	0.00787099
YCR083W	TRX3	Mitochondrial thioredoxin, highly conserved oxidoreductase required to maintain the redox homeostasis of the cell, forms the mitochondrial thioredoxin system with Trr2p, redox state is maintained by both Trr2p and Glr1p	0.054274	0.0946563	-0.013831	-0.0216781	-0.103746	-0.103764	-0.426153	-0.706951	-0.3955
YCR084C	TUP1	General repressor of transcription, forms complex with Cyc8p, involved in the establishment of repressive chromatin structure through interactions with histones H3 and H4, appears to enhance expression of some genes	-0.0140689	0.000351965	-0.059902	0.0479869	0.0455366	0.123382	-0.0471365	-0.0211978	-0.0888112
YCR086W	CSM1	Nucleolar protein that forms a complex with Lrs4p and then Mam1p at kinetochores during meiosis I to mediate accurate homolog segregation; required for condensin recruitment to the replication fork barrier site and rDNA repeat segregation	0.0440299	0.0341252	0.100386	0.173482	0.115804	0.13822	0.314783	0.160073	0.273628
YCR087C-A	YCR087C-A	Putative protein of unknown function; green fluorescent protein (GFP)-fusion protein localizes to the nucleolus; YCR087C-A is not an essential gene	0.0935485	0.0181919	0.120669	-0.146264	-0.036278	-0.129296	-0.0817645	0.0055305	-0.146162
YCR088W	ABP1	Actin-binding protein of the cortical actin cytoskeleton, important for activation of the Arp2/3 complex that plays a key role actin in cytoskeleton organization	0.0319776	0.10989	0.0204488	-0.0324611	-0.059554	-0.00050765	0.0134925	0.196342	0.0984214
YCR090C	YCR090C	Putative protein of unknown function; green fluorescent protein (GFP)-fusion protein localizes to the cytoplasm and nucleus; YCR090C is not an essential gene	0.0744745	0.0564908	-0.042296	-0.0106711	-0.12782	-0.0790073	0.0539535	-0.120478	0.0594166
YCR092C	MSH3	Mismatch repair protein, forms dimers with Msh2p that mediate repair of insertion or deletion mutations and removal of nonhomologous DNA ends, contains a PCNA (Pol30p) binding motif required for genome stability	-0.223566	-0.241305	-0.160765	-0.0399971	0.0756064	0.0177143	0.0224785	0.303963	0.283844
YCR093W	CDC39	Component of the CCR4-NOT complex, which has multiple roles in regulating mRNA levels including regulation of transcription and destabilizing mRNAs by deadenylation; basal transcription factor	0.104206	-0.00736632	-0.03549	0.147725	0.0639704	0.0990203	0.110761	0.192026	0.178399
YCR094W	CDC50	Endosomal protein that interacts with phospholipid flippase Drs2p; interaction with Cdc50p is essential for Drs2p catalytic activity; mutations affect cell polarity and polarized growth; similar to Ynr048wp and Lem3p	0.14859	0.0301038	0.0769762	-0.0585641	-0.149202	-0.213916	0.0345495	0.197198	0.145651
YCR095C	OCA4	Cytoplasmic protein required for replication of Brome mosaic virus in S. cerevisiae, which is a model system for studying replication of positive-strand RNA viruses in their natural hosts	0.0470127	-0.199905	-0.014281	-0.438785	-0.315587	-0.209277	-0.144034	-0.280132	-0.27229
YDL001W	RMD1	Cytoplasmic protein required for sporulation	-0.133769	-0.168685	-0.085047	-0.0168561	-0.0033201	-0.183365	-0.10365	-0.220185	-0.168529
YDL002C	NHP10	Protein related to mammalian high mobility group proteins; preferentially binds DNA ends, protecting them from exonucleatic cleavage; likely component of the chromatin-remodeling complex INO80 complex; proposed to be involved in DNA repair	0.0370857	-0.0166787	-0.011111	-0.0555411	-0.107497	-0.106942	-0.0074395	0.0656087	0.0383189
YDL003W	MCD1	Essential subunit of the cohesin complex required for sister chromatid cohesion in mitosis and meiosis; apoptosis induces cleavage and translocation of a C-terminal fragment to mitochondria; expression peaks in S phase	0.0385536	-0.0590173	0.0521679	-0.059387	0.0989318	0.0485809	0.173116	0.18032	0.195313
YDL005C	MED2	Subunit of the RNA polymerase II mediator complex; associates with core polymerase subunits to form the RNA polymerase II holoenzyme; essential for transcriptional regulation	0.0998353	0.188151	0.142777	0.066078	0.21835	0.238751	0.153028	-0.0068244	0.0958887
YDL006W	PTC1	Type 2C protein phosphatase (PP2C); dephosphorylates Hog1p, inactivating osmosensing MAPK cascade; involved in Fus3p activation during pheromone response; deletion affects precursor tRNA splicing, mitochondrial inheritance, and sporulation	-0.0350072	-0.0588863	-0.087554	0.0490861	-0.056509	-0.0908412	0.232848	0.120705	0.160685
YDL007W	RPT2	One of six ATPases of the 19S regulatory particle of the 26S proteasome involved in the degradation of ubiquitinated substrates; required for normal peptide hydrolysis by the core 20S particle	-0.0613829	0.030362	-0.037248	0.134636	0.02442	0.172481	-0.0984282	-0.0938449	-0.0707988
YDL008W	APC11	Catalytic core subunit of the Anaphase-Promoting Complex/Cyclosome (APC/C), which is a ubiquitin-protein ligase required for degradation of anaphase inhibitors, including mitotic cyclins, during the metaphase/anaphase transition	-0.0037273	0.0965043	0.0988663	0.0745061	0.0209938	0.0314687	-0.0239071	-0.014519	0.0917095
YDL010W	GRX6	Cis-golgi localized monothiol glutaredoxin that binds an iron-sulfur cluster; more similar in activity to dithiol than other monothiol glutaredoxins; involved in the oxidative stress response; functional overlap with GRX7	-0.0600899	0.0435845	0.0231472	-0.384432	-0.382861	-0.476165	0.397106	0.312913	0.333082
YDL014W	NOP1	Nucleolar protein, component of the small subunit processome complex, which is required for processing of pre-18S rRNA; has similarity to mammalian fibrillarin	0.0479189	0.0685452	0.0864142	0.0167385	0.0119873	0.0332117	-0.109939	-0.150513	-0.127648
YDL015C	TSC13	Enoyl reductase that catalyzes the last step in each cycle of very long chain fatty acid elongation, localizes to the ER, highly enriched in a structure marking nuclear-vacuolar junctions, coimmunoprecipitates with elongases Fen1p and Sur4p	0.0200792	-0.0832365	-0.206063	0.166875	0.0205444	0.18821	-0.0319546	-0.0783964	-0.176251
YDL017W	CDC7	DDK (Dbf4-dependent kinase) catalytic subunit required for firing origins and replication fork progression in S phase through phosphorylation of Mcm2-7p complexes and Cdc45p; kinase activity correlates with cyclical DBF4 expression	0.0616593	0.0140769	0.0865748	0.0686305	0.0367552	0.0410247	0.0827845	0.0874417	0.105555
YDL018C	ERP3	Protein with similarity to Emp24p and Erv25p, member of the p24 family involved in ER to Golgi transport	-0.281026	-0.0984961	-0.219887	-0.143131	-0.329252	-0.127955	-0.431091	-0.264161	-0.354632
YDL019C	OSH2	Member of an oxysterol-binding protein family with seven members in S. cerevisiae; family members have overlapping, redundant functions in sterol metabolism and collectively perform a function essential for viability	0.132092	0.0385677	0.107706	0.118998	0.0757563	0.0877567	0.0583895	0.0185069	0.0681174
YDL021W	GPM2	Homolog of Gpm1p phosphoglycerate mutase, which converts 3-phosphoglycerate to 2-phosphoglycerate in glycolysis; may be non-functional derivative of a gene duplication event	0.133133	0.0124257	-0.089831	-0.865139	-0.668421	-0.725137	-1.71488	-1.61769	-1.77266
YDL022W	GPD1	NAD-dependent glycerol-3-phosphate dehydrogenase, key enzyme of glycerol synthesis, essential for growth under osmotic stress; expression regulated by high-osmolarity glycerol response pathway; homolog of Gpd2p	-0.0535556	0.00375134	-0.069478	-0.4297	-0.41191	-0.372946	-1.83501	-1.69389	-1.67181
YDL025C	YDL025C	Putative protein kinase, potentially phosphorylated by Cdc28p; interacts with ribosome biogenesis factors, Cka2, Gus1 and Arc1	-0.16622	0.0397568	-0.037822	-0.210868	-0.308353	-0.439279	-0.681555	-0.686809	-0.562141
YDL027C	YDL027C	Putative protein of unknown function; the authentic, non-tagged protein is detected in highly purified mitochondria in high-throughput studies; YDL027C is not an essential gene	0.0582945	-0.00142489	0.0808265	0.0817804	-0.057366	0.0611966	-0.183855	-0.271812	-0.267429
YDL029W	ARP2	Essential component of the Arp2/3 complex, which is a highly conserved actin nucleation center required for the motility and integrity of actin patches; involved in endocytosis and membrane growth and polarity	0.0620123	0.0823563	0.0548832	0.174891	0.0974542	0.0823526	0.591346	0.534435	0.560138
YDL030W	PRP9	Subunit of the SF3a splicing factor complex, required for spliceosome assembly; acts after the formation of the U1 snRNP-pre-mRNA complex	0.122751	-0.00172352	0.0818581	0.060433	0.0115082	-0.0772655	-0.0856845	-0.0686618	-0.0382218
YDL031W	DBP10	Putative ATP-dependent RNA helicase of the DEAD-box protein family, constituent of 66S pre-ribosomal particles; essential protein involved in ribosome biogenesis	0.167194	0.123782	0.0503404	0.18578	0.227361	0.184206	0.102046	0.125721	0.136606
YDL036C	PUS9	Mitochondrial tRNA:pseudouridine synthase, catalyzes the formation of pseudouridine at position 32 in mitochondrial tRNAs; contains an N-terminal mitochondrial targeting sequence	0.0013164	-0.0484968	-0.004597	-0.108974	-0.128347	-0.246944	0.111675	0.140847	0.120133
YDL040C	NAT1	Subunit of the N-terminal acetyltransferase NatA (Nat1p, Ard1p, Nat5p); N-terminally acetylates many proteins, which influences multiple processes such as the cell cycle, heat-shock resistance, mating, sporulation, and telomeric silencing	0.0130271	-0.0242548	-0.055203	-0.0114021	0.0506091	0.0371952	-0.254798	-0.234536	-0.306242
YDL042C	SIR2	Conserved NAD+ dependent histone deacetylase of the Sirtuin family involved in regulation of lifespan; plays roles in silencing at HML, HMR, telomeres, and the rDNA locus; negatively regulates initiation of DNA replication	-0.168311	-0.100836	0.0230384	-0.0814661	-0.213161	-0.231756	-0.367641	-0.278304	-0.324685
YDL043C	PRP11	Subunit of the SF3a splicing factor complex, required for spliceosome assembly	-0.0945669	-0.135196	0.001149	-0.270049	-0.112566	-0.200051	0.15352	0.0995937	0.168031
YDL044C	MTF2	Mitochondrial matrix protein that interacts with an N-terminal region of mitochondrial RNA polymerase (Rpo41p) and couples RNA processing and translation to transcription	0.0087176	0.037875	0.135786	0.13058	0.100315	0.108816	0.0118965	0.0658067	-6.1e-06
YDL045C	FAD1	Flavin adenine dinucleotide (FAD) synthetase, performs the second step in synthesis of FAD from riboflavin	0.0243019	0.1331	0.283815	0.116671	0.137341	0.229469	0.284493	0.320683	0.411761
YDL045W-A	MRP10	Mitochondrial ribosomal protein of the small subunit; contains twin cysteine-x9-cysteine motifs	-0.40249	-0.223233	0.328323	1.07723	0.189378	0.131094	-0.0261816	-0.116769	-0.055593
YDL046W	NPC2	Functional homolog of human NPC2/He1, which is a cholesterol-binding protein whose deficiency causes Niemann-Pick type C2 disease involving retention of cholesterol in lysosomes	-0.255562	0.285978	0.445032	0.383726	0.476229	0.642148	0.228651	0.379926	0.580701
YDL047W	SIT4	Type 2A-related serine-threonine phosphatase that functions in the G1/S transition of the mitotic cycle; cytoplasmic and nuclear protein that modulates functions mediated by Pkc1p including cell wall and actin cytoskeleton organization	-0.0591969	-0.0797858	0.00385	0.034889	-0.043882	-0.0383378	0.0073995	0.0214982	0.0115118
YDL051W	LHP1	RNA binding protein required for maturation of tRNA and U6 snRNA precursors; acts as a molecular chaperone for RNAs transcribed by polymerase III; homologous to human La (SS-B) autoantigen	0.0918307	0.109557	0.0314585	-0.0828321	-0.144187	-0.0125214	0.0158895	0.0384677	-0.0242082
YDL052C	SLC1	1-acyl-sn-glycerol-3-phosphate acyltransferase, catalyzes the acylation of lysophosphatidic acid to form phosphatidic acid, a key intermediate in lipid metabolism; enzymatic activity detected in lipid particles and microsomes	-0.0659479	-0.00982931	-0.081714	-0.137796	-0.249807	-0.151748	0.0011485	-0.0593954	-0.0765166
YDL053C	PBP4	Pbp1p binding protein, interacts strongly with Pab1p-binding protein 1 (Pbp1p) in the yeast two-hybrid system; also interacts with Lsm12p in a copurification assay	-0.0446534	-0.129648	-0.13816	-0.166231	-0.195882	-0.176059	-0.204873	-0.183134	-0.188126
YDL055C	PSA1	GDP-mannose pyrophosphorylase (mannose-1-phosphate guanyltransferase), synthesizes GDP-mannose from GTP and mannose-1-phosphate in cell wall biosynthesis; required for normal cell wall structure	0.0304697	0.0726404	-0.028463	0.0205572	-0.046366	0.0439328	-0.173388	-0.180097	-0.192508
YDL056W	MBP1	Transcription factor involved in regulation of cell cycle progression from G1 to S phase, forms a complex with Swi6p that binds to MluI cell cycle box regulatory element in promoters of DNA synthesis genes	0.110765	0.0590728	0.0622274	-0.0151711	0.0710861	-0.00607325	0.0605205	-0.0054562	0.0531245
YDL057W	YDL057W	Putative protein of unknown function; YDL057W is not an essential gene	0.0863167	0.0727527	0.172933	0.0829205	-0.0055252	0.107596	0.0589805	0.256209	0.18084
YDL058W	USO1	Essential protein involved in the vesicle-mediated ER to Golgi transport step of secretion; binds membranes and functions during vesicle docking to the Golgi; required for assembly of the ER-to-Golgi SNARE complex	0.114932	0.0348245	0.0428248	0.19483	0.20692	0.161122	0.165091	0.216576	0.241069
YDL060W	TSR1	Protein required for processing of 20S pre-rRNA in the cytoplasm, associates with pre-40S ribosomal particles	0.0994968	0.0558015	0.0410881	-0.00972705	-0.056941	-0.0726171	-0.0870646	-0.0115377	-0.0480739
YDL061C	RPS29B	Protein component of the small (40S) ribosomal subunit; nearly identical to Rps29Ap and has similarity to rat S29 and E. coli S14 ribosomal proteins	0.126572	0.141294	0.107748	-0.0751041	-0.165851	-0.152291	-0.219965	-0.0910147	-0.0914592
YDL063C	YDL063C	Protein required for biogenesis of the large ribosomal subunit; green fluorescent protein (GFP)-fusion protein localizes to the cytoplasm and nucleus	0.0845578	0.138493	0.129902	-0.117878	-0.0052796	-0.146521	0.129067	0.100009	0.147978
YDL064W	UBC9	SUMO-conjugating enzyme involved in the Smt3p conjugation pathway; nuclear protein required for S- and M-phase cyclin degradation and mitotic control; involved in proteolysis mediated by the anaphase-promoting complex cyclosome (APCC)	-0.0248751	0.018973	0.006414	0.314606	0.140507	0.177319	0.217754	0.210323	0.254975
YDL065C	PEX19	Chaperone and import receptor for newly-synthesized class I peroxisomal membrane proteins (PMPs), binds PMPs in the cytoplasm and delivers them to the peroxisome for subsequent insertion into the peroxisomal membrane	-0.0357008	0.0161046	-0.038016	-0.047786	0.075684	0.0528474	-0.0101403	-0.0743708	-0.0834665
YDL066W	IDP1	Mitochondrial NADP-specific isocitrate dehydrogenase, catalyzes the oxidation of isocitrate to alpha-ketoglutarate; not required for mitochondrial respiration and may function to divert alpha-ketoglutarate to biosynthetic processes	-0.133374	-0.128169	-0.158867	-0.387033	-0.455866	-0.403136	-0.564759	-0.595995	-0.536618
YDL067C	COX9	Subunit VIIa of cytochrome c oxidase, which is the terminal member of the mitochondrial inner membrane electron transport chain	-0.0733629	-0.121564	-0.156239	0.290183	0.180421	0.34977	-0.139277	-0.182503	-0.276511
YDL069C	CBS1	Mitochondrial translational activator of the COB mRNA; membrane protein that interacts with translating ribosomes, acts on the COB mRNA 5'-untranslated leader	0.0252592	-0.155992	-0.217422	-0.376838	-0.016467	-0.233479	-0.141216	0.0754077	0.0717752
YDL070W	BDF2	Protein involved in transcription initiation at TATA-containing promoters; associates with the basal transcription factor TFIID; contains two bromodomains; corresponds to the C-terminal region of mammalian TAF1; redundant with Bdf1p	-0.0059154	-0.156567	0.0646656	0.242776	0.315627	0.253266	-0.209431	-0.416347	-0.213009
YDL072C	YET3	Protein of unknown function; YET3 null mutant decreases the level of secreted invertase; homolog of human BAP31 protein	-0.0524462	-0.0231054	-0.046933	0.143469	0.0205406	0.116285	-0.116871	-0.0154142	-0.0607712
YDL074C	BRE1	E3 ubiquitin ligase, forms heterodimer with Rad6p to monoubiquinate histone H2B-K123, which is required for the subsequent methylation of histone H3-K4 and H3-K79; required for DSBR, transcription, silencing, and checkpoint control	0.0433984	-0.0452047	0.01805	0.0965712	0.103621	0.0778994	-0.102204	-0.099678	-0.0714308
YDL075W	RPL31A	Protein component of the large (60S) ribosomal subunit, nearly identical to Rpl31Bp and has similarity to rat L31 ribosomal protein; associates with the karyopherin Sxm1p; loss of both Rpl31p and Rpl39p confers lethality	-0.179819	0.00176355	-0.025199	0.112259	-0.062685	0.0791208	-0.0746403	-0.0235389	-0.0394322
YDL076C	RXT3	Subunit of the RPD3L complex; involved in histone deacetylation	-0.0007165	-0.137868	-0.020061	-0.124262	-0.0120663	-0.0256803	-0.212369	-0.190454	-0.155993
YDL077C	VAM6	Vacuolar protein that plays a critical role in the tethering steps of vacuolar membrane fusion by facilitating guanine nucleotide exchange on small guanosine triphosphatase Ypt7p	0.129501	-0.0268914	0.138547	0.138817	0.247742	0.185433	0.2234	0.121509	0.207651
YDL078C	MDH3	Peroxisomal malate dehydrogenase, catalyzes interconversion of malate and oxaloacetate; involved in the glyoxylate cycle	-0.0924689	-0.0294874	-0.074028	-0.0522031	-0.086921	-0.0139362	-0.220188	-0.240699	-0.238002
YDL080C	THI3	Probable alpha-ketoisocaproate decarboxylase, may have a role in catabolism of amino acids to long-chain and complex alcohols; required for expression of enzymes involved in thiamine biosynthesis	0.145427	0.0990474	0.157275	0.108262	0.0990982	0.182183	0.0388815	0.0198491	0.246982
YDL081C	RPP1A	Ribosomal stalk protein P1 alpha, involved in the interaction between translational elongation factors and the ribosome; accumulation of P1 in the cytoplasm is regulated by phosphorylation and interaction with the P2 stalk component	0.0230644	-0.0212812	0.005126	0.0908922	0.276095	0.161975	0.0670275	-0.0222407	0.0517529
YDL084W	SUB2	Component of the TREX complex required for nuclear mRNA export; member of the DEAD-box RNA helicase superfamily and is involved in early and late steps of spliceosome assembly; homolog of the human splicing factor hUAP56	-0.0551752	0.010761	-0.055104	0.0375536	-0.0090465	0.0347438	-0.14176	-0.13784	-0.168739
YDL085C-A	YDL085C-A	Putative protein of unknown function; green fluorescent protein (GFP)-fusion protein localizes to the cytoplasm and nucleus	-0.185003	-0.00921442	-0.289296	-0.282746	-0.190168	-0.490026	-0.349904	-0.227632	-0.365322
YDL086W	YDL086W	Putative protein of unknown function; the authentic, non-tagged protein is detected in highly purified mitochondria in high-throughput studies; YDL086W is not an essential gene	-0.12627	-0.0460464	-0.049854	0.121033	0.0010798	0.0460051	-0.239647	-0.226308	-0.210959
YDL087C	LUC7	Essential protein associated with the U1 snRNP complex; splicing factor involved in recognition of 5' splice site; contains two zinc finger motifs; N-terminal zinc finger binds pre-mRNA	0.145042	0.0185351	0.115967	-0.0712321	0.013889	-0.129409	0.25601	0.181219	0.161043
YDL088C	ASM4	Nuclear pore complex subunit, part of a subcomplex also containing Nup53p, Nup170p, and Pse1p	-0.0421516	0.0829986	0.0253463	0.0146947	-0.132199	-0.00228745	-0.110417	-0.0789911	-0.158883
YDL089W	NUR1	Protein of unknown function; interacts with Csm1p, Lrs4p; required for rDNA repeat stability; null mutant causes increase in unequal sister-chromatid exchange; GFP-fusion protein localizes to the nuclear periphery, possible Cdc28p substrate	0.11048	0.0612112	-0.098638	0.0723827	0.048321	0.100683	0.0933125	0.114737	0.200349
YDL090C	RAM1	Beta subunit of the CAAX farnesyltransferase (FTase) that prenylates the a-factor mating pheromone and Ras proteins; required for the membrane localization of Ras proteins and a-factor; homolog of the mammalian FTase beta subunit	-0.0522834	-0.0389127	-0.128917	-0.269626	-0.231931	-0.247395	0.277203	0.377008	0.297017
YDL091C	UBX3	UBX (ubiquitin regulatory X) domain-containing protein that interacts with Cdc48p, green fluorescent protein (GFP)-fusion protein localizes to the cytoplasm in a punctate pattern	0.15938	-0.264897	-0.11039	0.0544499	-0.172252	-0.29718	-0.267628	-0.202761	-0.0635289
YDL092W	SRP14	Signal recognition particle (SRP) subunit, interacts with the RNA component of SRP to form the Alu domain, which is the region of SRP responsible for arrest of nascent chain elongation during membrane targeting; homolog of mammalian SRP14	0.004807	-0.105392	0.0585597	0.00712245	0.0013002	-0.0681567	0.222371	0.139806	0.164161
YDL095W	PMT1	Protein O-mannosyltransferase, transfers mannose from dolichyl phosphate-D-mannose to protein Ser/Thr residues; 1 of 7 related proteins involved in O-glycosylation which is essential for cell wall rigidity; involved in ER quality control	0.104644	0.0365903	-0.032014	0.100833	0.0048375	0.0824822	-0.0050865	0.104355	0.0228318
YDL097C	RPN6	Essential, non-ATPase regulatory subunit of the 26S proteasome lid required for the assembly and activity of the 26S proteasome; the human homolog (S9 protein) partially rescues Rpn6p depletion	0.0404787	0.0448077	0.0349149	0.269864	0.259014	0.276044	0.114203	0.114572	0.0967482
YDL098C	SNU23	Component of U4/U6.U5 snRNP involved in mRNA splicing via spliceosome	0.100941	0.0459864	0.0291868	-0.0387241	-0.032157	0.168722	-0.27157	-0.141306	-0.0870189
YDL099W	BUG1	Cis-golgi localized protein involved in ER to Golgi transport; forms a complex with the mammalian GRASP65 homolog, Grh1p; mutants are compromised for the fusion of ER-derived vesicles with Golgi membranes	0.0069434	0.0366489	-0.020588	-0.118168	-0.145118	-0.182171	-0.0625427	-0.0705577	-0.0983892
YDL100C	GET3	Guanine nucleotide exchange factor for Gpa1p; amplifies G protein signaling; subunit of the GET complex, which is involved in Golgi to ER trafficking and insertion of proteins into the ER membrane; has low-level ATPase activity	-0.0003291	0.107202	0.0756789	0.220298	0.216502	0.269504	0.0192295	0.106914	0.0617107
YDL101C	DUN1	Cell-cycle checkpoint serine-threonine kinase required for DNA damage-induced transcription of certain target genes, phosphorylation of Rad55p and Sml1p, and transient G2/M arrest after DNA damage; also regulates postreplicative DNA repair	0.0054366	-0.0139348	-0.04327	-0.0386631	-0.052146	-0.0513036	0.260934	0.243885	0.227319
YDL102W	POL3	Catalytic subunit of DNA polymerase delta; required for chromosomal DNA replication during mitosis and meiosis, intragenic recombination, repair of double strand DNA breaks, and DNA replication during nucleotide excision repair (NER)	0.0820343	0.00449227	-0.020559	0.0678617	0.162034	0.0327381	0.174508	0.20937	0.199558
YDL103C	QRI1	UDP-N-acetylglucosamine pyrophosphorylase, catalyzes the formation of UDP-N-acetylglucosamine (UDP-GlcNAc), which is important in cell wall biosynthesis, protein N-glycosylation, and GPI anchor biosynthesis	-0.035861	-0.083465	-0.044038	-0.0851121	-0.10221	-0.0797923	0.0223215	-0.0265351	-0.0116293
YDL105W	NSE4	Nuclear protein that plays a role in the function of the Smc5p-Rhc18p complex	-0.0549747	-0.0104489	0.0861829	0.0152926	0.0588756	0.0533821	0.404029	0.330444	0.313909
YDL106C	PHO2	Homeobox transcription factor; regulatory targets include genes involved in phosphate metabolism; binds cooperatively with Pho4p to the PHO5 promoter; phosphorylation of Pho2p facilitates interaction with Pho4p	-0.0624599	-0.0902598	-0.081026	-0.310208	-0.263367	-0.294058	-0.0370848	0.0230172	-0.0131052
YDL107W	MSS2	Peripherally bound inner membrane protein of the mitochondrial matrix involved in membrane insertion of C-terminus of Cox2p, interacts genetically and physically with Cox18p	0.0733932	-0.142553	-0.083326	0.0796465	0.0133663	-0.0837083	-0.0606813	0.0571383	-0.162531
YDL108W	KIN28	Serine/threonine protein kinase, subunit of the transcription factor TFIIH; involved in transcription initiation at RNA polymerase II promoters	-0.0399781	-0.0463652	-0.063409	-0.00084815	-0.0104351	-0.1281	0.160022	0.115744	0.195545
YDL110C	TMA17	Protein of unknown function that associates with ribosomes; heterozygous deletion demonstrated increases in chromosome instability in a rad9 deletion background; protein abundance is decreased upon intracellular iron depletion	-0.0477139	-0.138122	-0.138306	-0.28549	-0.099689	-0.133374	-1.33301	-1.3752	-1.25708
YDL111C	RRP42	Exosome non-catalytic core component; involved in 3'-5' RNA processing and degradation in both the nucleus and the cytoplasm; has similarity to E. coli RNase PH and to human hRrp42p (EXOSC7)	-0.0410397	-0.0948141	-0.159875	-0.134493	-0.084732	-0.0288491	0.299307	0.401715	0.255687
YDL112W	TRM3	2'-O-ribose methyltransferase, catalyzes the ribose methylation of the guanosine nucleotide at position 18 of tRNAs	0.123042	0.0831999	0.00676	0.117772	0.188196	0.113889	0.123844	0.16564	0.116406
YDL113C	ATG20	Sorting nexin family member required for the cytoplasm-to-vacuole targeting (Cvt) pathway and for endosomal sorting; has a Phox homology domain that binds phosphatidylinositol-3-phosphate; interacts with Snx4p; potential Cdc28p substrate	0.0792163	0.0642834	0.0554253	0.189668	0.168278	0.141454	0.231296	0.167181	0.165956
YDL115C	IWR1	Protein involved in transcription from polymerase II promoters; interacts with with most of the polymerase II subunits; nucleo-cytoplasmic shuttling protein; deletion causes hypersensitivity to the K1 killer toxin	-0.0878969	-0.0992341	-0.02773	-0.305837	-0.224231	-0.219709	0.226472	0.173318	0.213252
YDL116W	NUP84	Subunit of the nuclear pore complex (NPC), forms a subcomplex with Nup85p, Nup120p, Nup145p-C, Sec13p, and Seh1p that plays a role in nuclear mRNA export and NPC biogenesis	-0.0036336	-0.0229688	-0.084135	-0.00929505	-0.081903	-0.0383281	-0.010205	0.0982547	0.051668
YDL117W	CYK3	SH3-domain protein located in the mother-bud neck and the cytokinetic actin ring; mutant phenotype and genetic interactions suggest a role in cytokinesis	-0.0730459	-0.0642774	-0.057462	0.106637	0.216674	0.0907685	0.0793145	0.110487	0.0750712
YDL119C	YDL119C	Putative mitochondrial transport protein; GFP-fusion protein is induced in response to the DNA-damaging agent MMS; the authentic, non-tagged protein is detected in purified mitochondria	0.0176269	-0.0186701	-0.077722	0.115945	0.189545	0.140167	0.0196145	0.111172	0.111422
YDL120W	YFH1	Mitochondrial matrix iron chaperone; oxidizes and stores iron; interacts with Isu1p to promote Fe-S cluster assembly; mutation results in multiple Fe/S-dependent enzyme deficiencies; human frataxin homolog is mutated in Friedrich's ataxia	0.0873685	0.0128603	-0.024195	-0.288168	-0.622789	-0.552816	-0.1347	-0.267542	0.0497447
YDL121C	YDL121C	Putative protein of unknown function; green fluorescent protein (GFP)-fusion protein localizes to the endoplasmic reticulum; YDL121C is not an essential protein	-0.156284	0.0760416	-0.002416	-0.192423	-0.284906	-0.109292	-0.107383	-0.0747311	-0.12681
YDL122W	UBP1	Ubiquitin-specific protease that removes ubiquitin from ubiquitinated proteins; cleaves at the C terminus of ubiquitin fusions irrespective of their size; capable of cleaving polyubiquitin chains	-0.0076029	0.000842675	0.0396888	-0.0552661	-0.107927	-0.0921963	-0.186034	-0.280362	-0.215264
YDL123W	SNA4	Protein of unknown function, localized to the vacuolar outer membrane; predicted to be palmitoylated	-0.328311	-0.0808039	-0.041603	-0.338012	0.275377	0.367452	-0.441474	-0.142349	-0.280615
YDL124W	YDL124W	NADPH-dependent alpha-keto amide reductase; reduces aromatic alpha-keto amides, aliphatic alpha-keto esters, and aromatic alpha-keto esters; member of the aldo-keto reductase (AKR) family	0.484008	0.428303	0.263619	0.0143584	-0.029914	0.00783215	-1.09214	-1.37016	-1.18211
YDL125C	HNT1	Adenosine 5'-monophosphoramidase; interacts physically and genetically with Kin28p, a CDK and TFIIK subunit, and genetically with CAK1; member of the histidine triad (HIT) superfamily of nucleotide-binding proteins and similar to Hint	0.0218257	-0.0380627	-0.204729	-0.0252681	0.0842081	0.0652182	0.385463	0.15336	0.560488
YDL126C	CDC48	ATPase in ER, nuclear membrane and cytosol with homology to mammalian p97; in a complex with Npl4p and Ufd1p participates in retrotranslocation of ubiquitinated proteins from the ER into the cytosol for degradation by the proteasome	0.0864294	0.091103	0.0362637	0.259089	0.197139	0.256633	-0.268958	-0.256146	-0.299736
YDL128W	VCX1	Vacuolar membrane antiporter with Ca2+/H+ and K+/H+ exchange activity, involved in control of cytosolic Ca2+ and K+ concentrations; has similarity to sodium/calcium exchangers, including the bovine Na+/Ca2+,K+ antiporter	-0.371937	-0.278469	-0.236635	-0.242837	-0.356723	-0.205579	0.284705	0.411105	0.238221
YDL130W	RPP1B	Ribosomal protein P1 beta, component of the ribosomal stalk, which is involved in interaction of translational elongation factors with ribosome; accumulation is regulated by phosphorylation and interaction with the P2 stalk component	0.120629	0.097961	0.363734	0.363655	0.587718	0.401501	0.292297	0.297227	0.252286
YDL130W-A	STF1	Protein involved in regulation of the mitochondrial F1F0-ATP synthase; Stf1p and Stf2p may act as stabilizing factors that enhance inhibitory action of the Inh1p protein	-0.208545	0.205287	-0.032932	0.122197	0.103379	0.104738	-0.599704	-0.528771	-0.558017
YDL131W	LYS21	Homocitrate synthase isozyme, catalyzes the condensation of acetyl-CoA and alpha-ketoglutarate to form homocitrate, which is the first step in the lysine biosynthesis pathway; highly similar to the other isozyme, Lys20p	-0.223748	-0.198272	-0.195179	-0.640427	-0.679309	-0.701541	-0.0062655	-0.0343517	-0.0600461
YDL132W	CDC53	Cullin, structural protein of SCF complexes (which also contain Skp1p, Cdc34p, Hrt1p and an F-box protein) involved in ubiquitination; SCF promotes the G1-S transition by targeting G1 cyclins and the Cln-CDK inhibitor Sic1p for degradation	0.111081	0.0499689	0.057326	0.242241	0.170898	0.189198	-0.236062	-0.179953	-0.205066
YDL134C	PPH21	Catalytic subunit of protein phosphatase 2A (PP2A), functionally redundant with Pph22p; methylated at C terminus; forms alternate complexes with several regulatory subunits; involved in signal transduction and regulation of mitosis	-0.0712889	0.0358187	0.0607211	0.300064	0.214148	0.10505	0.15968	0.0898317	0.0924346
YDL135C	RDI1	Rho GDP dissociation inhibitor involved in the localization and regulation of Cdc42p	-0.0105959	0.137621	0.102335	0.258139	0.125265	0.226403	0.0919145	0.129127	0.0487023
YDL137W	ARF2	ADP-ribosylation factor, GTPase of the Ras superfamily involved in regulation of coated formation vesicles in intracellular trafficking within the Golgi; functionally interchangeable with Arf1p	0.137013	0.0561844	-0.003883	-0.0300011	0.0981202	0.0410129	0.0788655	-0.0489404	0.0985459
YDL140C	RPO21	RNA polymerase II largest subunit B220, part of central core; phosphorylation of C-terminal heptapeptide repeat domain regulates association with transcription and splicing factors; similar to bacterial beta-prime	0.0980859	0.0704793	-0.022054	0.169502	0.143877	0.195242	0.126583	0.160313	0.124465
YDL141W	BPL1	Biotin:apoprotein ligase, covalently modifies proteins with the addition of biotin, required for acetyl-CoA carboxylase (Acc1p) holoenzyme formation	0.0601139	0.040177	0.0627091	-0.0250991	-0.049694	-0.0195227	-0.0295747	-0.0022158	0.00887404
YDL143W	CCT4	Subunit of the cytosolic chaperonin Cct ring complex, related to Tcp1p, required for the assembly of actin and tubulins in vivo	0.0187613	0.0268875	0.0669628	0.144773	0.0943862	0.094122	0.0972565	0.121438	0.0761902
YDL144C	YDL144C	Putative protein of unknown function; green fluorescent protein (GFP)-fusion protein localizes to the cytoplasm and nucleus; YDL144C is not an essential gene.	-0.03116	-0.0349828	-0.108643	0.0391847	0.0732117	0.117645	-0.400026	-0.458148	-0.395545
YDL145C	COP1	Alpha subunit of COPI vesicle coatomer complex, which surrounds transport vesicles in the early secretory pathway	0.0985195	0.0490998	-0.012317	0.193427	0.103201	0.134488	0.0514985	0.0988037	0.0816308
YDL147W	RPN5	Essential, non-ATPase regulatory subunit of the 26S proteasome lid, similar to mammalian p55 subunit and to another S. cerevisiae regulatory subunit, Rpn7p	0.120359	0.0670894	0.049698	0.306293	0.230069	0.178217	0.0778915	0.158649	0.20409
YDL148C	NOP14	Nucleolar protein, forms a complex with Noc4p that mediates maturation and nuclear export of 40S ribosomal subunits; also present in the small subunit processome complex, which is required for processing of pre-18S rRNA	0.0962463	0.0813501	0.0580429	-0.0546681	-0.110906	-0.0779348	-0.198217	-0.0522223	-0.0995012
YDL150W	RPC53	RNA polymerase III subunit C53	0.0651685	0.110479	0.145551	-0.0469391	0.0196831	0.0870258	0.167188	0.303527	0.356478
YDL153C	SAS10	Essential subunit of U3-containing Small Subunit (SSU) processome complex involved in production of 18S rRNA and assembly of small ribosomal subunit; disrupts silencing when overproduced; mutant has increased aneuploidy tolerance	0.119774	0.0780415	0.0639585	-0.174629	-0.135911	-0.172651	0.0066435	0.0092873	0.0714486
YDL156W	YDL156W	Putative protein of unknown function; protein sequence contains three WD domains (WD-40 repeat); green fluorescent protein (GFP)-fusion protein localizes to the cytoplasm and nucleus	0.0606327	0.146697	0.11596	-0.206753	-0.099288	-0.00729915	0.109633	-0.0610575	0.0482742
YDL157C	YDL157C	Putative protein of unknown function; the authentic, non-tagged protein is detected in highly purified mitochondria in high-throughput studies	0.0680502	0.167338	0.289984	0.840131	0.822433	0.79383	0.4605	0.406484	0.481185
YDL159W	STE7	Signal transducing MAP kinase kinase involved in pheromone response, where it phosphorylates Fus3p, and in the pseudohyphal/invasive growth pathway, through phosphorylation of Kss1p; phosphorylated by Ste11p, degraded by ubiquitin pathway	-0.180299	-0.0945961	-0.191741	-0.091944	0.0030903	-0.0794053	0.165821	0.117019	0.1131
YDL160C	DHH1	Cytoplasmic DExD/H-box helicase, stimulates mRNA decapping, coordinates distinct steps in mRNA function and decay, interacts with both the decapping and deadenylase complexes, may have a role in mRNA export and translation	-0.0324399	0.0227679	-0.021459	-0.0154661	-0.043905	-0.0343822	-0.186067	-0.194307	-0.172745
YDL160C-A	YDL160C-A	Putative protein of unknown function; mutant in a srs2 mutant background displays MMS hypersensitivity; ortholog of human MHF2, a component of the Fanconi anemia (FA) complex that is involved in maintaining genome stability	0.143509	0.208456	0.333865	-0.109186	0.0141787	0.117831	-0.0450713	-0.138588	-0.271442
YDL161W	ENT1	Epsin-like protein involved in endocytosis and actin patch assembly and functionally redundant with Ent2p; binds clathrin via a clathrin-binding domain motif at C-terminus	0.0180115	0.0624059	0.0586729	0.177054	0.127304	0.205962	0.691617	0.719362	0.75082
YDL164C	CDC9	DNA ligase found in the nucleus and mitochondria, an essential enzyme that joins Okazaki fragments during DNA replication; also acts in nucleotide excision repair, base excision repair, and recombination	0.0832142	0.0493584	0.0645799	0.131968	0.202053	0.202078	0.0005185	0.0419416	0.0275952
YDL165W	CDC36	Component of the CCR4-NOT complex, which has multiple roles in regulating mRNA levels including regulation of transcription and destabilizing mRNAs by deadenylation; basal transcription factor	-0.0185911	0.0440061	-0.052069	0.234992	0.0621292	0.113943	0.0542765	0.101488	0.123539
YDL166C	FAP7	Essential NTPase required for small ribosome subunit synthesis, mediates processing of the 20S pre-rRNA at site D in the cytoplasm but associates only transiently with 43S preribosomes via Rps14p, may be the endonuclease for site D	0.0271365	0.129513	0.0650673	0.173901	0.0952138	0.169964	0.169481	0.181384	0.188122
YDL167C	NRP1	Putative RNA binding protein of unknown function; localizes to stress granules induced by glucose deprivation; predicted to be involved in ribosome biogenesis	0.0062238	0.0968747	0.0667414	-0.0796001	-0.173378	-0.128229	-0.201275	-0.090437	-0.133933
YDL168W	SFA1	Bifunctional enzyme containing both alcohol dehydrogenase and glutathione-dependent formaldehyde dehydrogenase activities, functions in formaldehyde detoxification and formation of long chain and complex alcohols, regulated by Hog1p-Sko1p	0.0632613	0.0698633	0.125747	0.0101127	-0.0103708	0.0146781	-0.256159	-0.202838	-0.244936
YDL171C	GLT1	NAD(+)-dependent glutamate synthase (GOGAT), synthesizes glutamate from glutamine and alpha-ketoglutarate; with Gln1p, forms the secondary pathway for glutamate biosynthesis from ammonia; expression regulated by nitrogen source	-0.0888029	-0.0950041	-0.138036	-0.394659	-0.427464	-0.38862	-0.142128	-0.0650268	-0.0906012
YDL173W	YDL173W	Putative protein of unknown function; hyperphosphorylated upon rapamycin treatment in a Tap42p-dependent manner; green fluorescent protein (GFP)-fusion protein localizes to the cytoplasm; PAR32 is not an essential gene	-0.208749	-0.20478	-0.13416	-0.196652	-0.096448	-0.0620766	0.0488305	0.296276	-0.124429
YDL174C	DLD1	D-lactate dehydrogenase, oxidizes D-lactate to pyruvate, transcription is heme-dependent, repressed by glucose, and derepressed in ethanol or lactate; located in the mitochondrial inner membrane	-0.304745	-0.314895	-0.291456	-0.15383	-0.230954	-0.185454	-0.702931	-0.70339	-0.773516
YDL175C	AIR2	Zinc knuckle protein, involved in nuclear RNA processing and degredation as a component of the TRAMP complex; stimulates the poly(A) polymerase activity of Pap2p in vitro; functionally redundant with Air1p	0.134187	-0.0722014	-0.530098	-1.39717	-0.245082	-0.165754	-0.390358	-0.407402	-0.510195
YDL178W	DLD2	D-lactate dehydrogenase, located in the mitochondrial matrix	-0.1012	-0.121281	-0.14578	-0.363374	-0.392349	-0.337392	-0.192422	-0.222549	-0.26739
YDL180W	YDL180W	Putative protein of unknown function; green fluorescent protein (GFP)-fusion protein localizes to the vacuole	-0.0164637	-0.193462	-0.080825	-0.0474331	-0.136962	-0.110968	0.132963	0.0789767	0.0389798
YDL181W	INH1	Protein that inhibits ATP hydrolysis by the F1F0-ATP synthase; inhibitory function is enhanced by stabilizing proteins Stf1p and Stf2p; has similarity to Stf1p; has a calmodulin-binding motif and binds calmodulin in vitro	-0.25484	-0.0733025	-0.41426	-0.0189211	0.0150331	0.0307902	-1.03513	-1.1686	-1.16602
YDL182W	LYS20	Homocitrate synthase isozyme, catalyzes the condensation of acetyl-CoA and alpha-ketoglutarate to form homocitrate, which is the first step in the lysine biosynthesis pathway; highly similar to the other isozyme, Lys21p	-0.405168	-0.288648	-0.348881	-0.540637	-0.582255	-0.556993	0.0837045	0.0844887	0.147599
YDL183C	YDL183C	Mitochondrial inner-membrane protein thought to be involved in the formation of an active mitochondrial K+/H+ exchanger (KHE) system; non-essential gene	-0.0589388	0.115367	-0.056728	-0.00083775	0.123815	0.133283	-0.244314	-0.170764	0.0227012
YDL185W	TFP1	Subunit A of the eight-subunit V1 peripheral membrane domain of the vacuolar H+-ATPase; protein precursor undergoes self-catalyzed splicing to yield the extein Tfp1p and the intein Vde (PI-SceI), which is a site-specific endonuclease	0.0053601	0.0511222	0.007695	-0.25464	-0.254108	-0.237502	-0.176407	-0.173305	-0.197862
YDL188C	PPH22	Catalytic subunit of protein phosphatase 2A (PP2A), functionally redundant with Pph21p; methylated at C terminus; forms alternate complexes with several regulatory subunits; involved in signal transduction and regulation of mitosis	0.212152	0.147017	0.117304	0.436323	0.627317	0.251486	0.253807	0.263255	0.15803
YDL189W	RBS1	Protein of unknown function, identified as a high copy suppressor of psk1 psk2 mutations that confer temperature-sensitivity for galactose utilization; proposed to bind single-stranded nucleic acids via its R3H domain	0.0068084	-0.0555521	0.0596383	-0.187571	-0.095553	-0.0679336	0.0045555	-0.0043778	-0.0377221
YDL190C	UFD2	Ubiquitin chain assembly factor (E4) that cooperates with a ubiquitin-activating enzyme (E1), a ubiquitin-conjugating enzyme (E2), and a ubiquitin protein ligase (E3) to conjugate ubiquitin to substrates; also functions as an E3	-0.0106572	-0.0447338	-0.000157	-0.00800605	0.0022492	0.0160743	-0.0997086	-0.0565677	-0.111287
YDL191W	RPL35A	Protein component of the large (60S) ribosomal subunit, identical to Rpl35Bp and has similarity to rat L35 ribosomal protein	-0.0600569	0.113951	-0.038149	0.0426645	-0.09426	0.100826	-0.0944827	-0.16235	-0.199343
YDL192W	ARF1	ADP-ribosylation factor, GTPase of the Ras superfamily involved in regulation of coated vesicle formation in intracellular trafficking within the Golgi; functionally interchangeable with Arf2p	0.0066113	0.125113	-0.039942	-0.190785	0.250927	0.0856225	-0.0277843	0.0779557	0.0444239
YDL193W	NUS1	Putative prenyltransferase, required for cell viability; proposed to be involved in protein trafficking because tet-repressible mutant shows accumulation of hypoglycosylated forms of CPY	0.131335	0.14967	0.0291647	0.126868	-0.169645	-0.0131278	-0.0889996	-0.0710398	-0.104161
YDL195W	SEC31	Component of the Sec13p-Sec31p complex of the COPII vesicle coat, required for vesicle formation in ER to Golgi transport; mutant has increased aneuploidy tolerance	0.0638224	0.0840867	0.0308658	0.0617804	0.0163861	0.0934002	0.0265975	0.0861317	0.0346105
YDL198C	GGC1	Mitochondrial GTP/GDP transporter, essential for mitochondrial genome maintenance; has a role in mitochondrial iron transport; member of the mitochondrial carrier family	-0.595164	-0.460701	-0.587792	-1.0073	-1.05679	-0.920596	-0.803856	-0.750933	-0.815299
YDL201W	TRM8	Subunit of a tRNA methyltransferase complex composed of Trm8p and Trm82p that catalyzes 7-methylguanosine modification of tRNA	-0.0711649	0.0103293	0.0389596	-0.108679	-0.061367	-0.0915452	-0.156196	-0.19394	-0.0788507
YDL202W	MRPL11	Mitochondrial ribosomal protein of the large subunit	-0.107686	-0.11708	-0.161221	-0.0254981	0.0208938	-0.0227834	-0.0302284	-0.122152	-0.124353
YDL203C	ACK1	Protein that functions upstream of Pkc1p in the cell wall integrity pathway; GFP-fusion protein expression is induced in response to the DNA-damaging agent MMS; non-tagged Ack1p is detected in purified mitochondria	-0.0237926	-0.121364	-0.034293	0.00036755	-0.046994	-0.117712	-0.0371726	0.0154755	-0.0074979
YDL204W	RTN2	Protein of unknown function; has similarity to mammalian reticulon proteins; member of the RTNLA (reticulon-like A) subfamily	-0.176394	-0.296338	-0.331864	1.57127	1.53951	1.53199	-1.56421	-1.37884	-1.69951
YDL205C	HEM3	Porphobilinogen deaminase, catalyzes the conversion of 4-porphobilinogen to hydroxymethylbilane, the third step in heme biosynthesis; localizes to the cytoplasm and nucleus; expression is regulated by Hap2p-Hap3p, but not by levels of heme	-0.014585	-0.0212414	0.0547572	0.0993656	0.0428953	0.109636	-0.046234	-0.15219	-0.178423
YDL207W	GLE1	Cytoplasmic nucleoporin required for polyadenylated RNA export but not for protein import; component of Nup82p nuclear pore subcomplex; contains a nuclear export signal	-0.114706	0.0254639	-0.070938	-0.0237251	0.0254963	-0.0631346	-0.123726	0.0345444	-0.0645533
YDL208W	NHP2	Nuclear protein related to mammalian high mobility group (HMG) proteins, essential for function of H/ACA-type snoRNPs, which are involved in 18S rRNA processing	0.0017459	0.136398	0.0623141	0.102656	0.0144126	0.144187	-0.0150538	0.0056579	-0.0486354
YDL209C	CWC2	Member of the NineTeen Complex (NTC) that contains Prp19p and stabilizes U6 snRNA in catalytic forms of the spliceosome containing U2, U5, and U6 snRNAs; binds directly to U6 snRNA; similar to S. pombe Cwf2	0.0398902	0.0402871	0.105615	0.183615	0.141739	0.0192938	-0.0955959	-0.128449	-0.156541
YDL213C	NOP6	Putative RNA-binding protein implicated in ribosome biogenesis; contains an RNA recognition motif (RRM) and has similarity to hydrophilins; NOP6 may be a fungal-specific gene as no homologs have been yet identified in higher eukaryotes	0.011909	0.210412	0.0473164	0.023322	0.0051475	0.158938	0.0796735	0.0855717	0.0414532
YDL215C	GDH2	NAD(+)-dependent glutamate dehydrogenase, degrades glutamate to ammonia and alpha-ketoglutarate; expression sensitive to nitrogen catabolite repression and intracellular ammonia levels	-0.208122	-0.356763	-0.398171	-1.00654	-0.932514	-1.0117	-0.395636	-0.373359	-0.327797
YDL217C	TIM22	Essential core component of the mitochondrial TIM22 complex involved in insertion of polytopic proteins into the inner membrane; forms the channel through which proteins are imported	-0.205491	-0.1057	-0.050144	0.28592	0.222744	0.294332	0.104462	0.199223	0.0804624
YDL219W	DTD1	D-Tyr-tRNA(Tyr) deacylase, functions in protein translation, may affect nonsense suppression via alteration of the protein synthesis machinery; ubiquitous among eukaryotes	0.0767693	0.163094	0.0411147	0.475451	0.362245	0.160493	0.395895	0.0834517	0.16919
YDL220C	CDC13	Single stranded DNA-binding protein found at TG1-3 telomere G-tails; regulates telomere replication through recruitment of specific sub-complexes, but the essential function is telomere capping	-0.032781	0.102203	-0.216664	0.128407	-0.043914	0.12654	0.266779	0.0299661	0.14674
YDL224C	WHI4	Putative RNA binding protein and partially redundant Whi3p homolog that regulates the cell size requirement for passage through Start and commitment to cell division	-0.0807509	0.0363015	0.0159564	-0.231044	-0.145249	-0.147481	-0.241336	-0.275022	-0.134585
YDL225W	SHS1	One of five related septins (Cdc3p, Cdc10p, Cdc11p, Cdc12p, Shs1p) that form a cortical filamentous collar at the mother-bud neck which is necessary for normal morphogenesis and cytokinesis	-0.107297	-0.048809	-0.08838	-0.149144	-0.190556	-0.0819003	-0.0204845	0.0485135	-0.0233084
YDL226C	GCS1	ADP-ribosylation factor GTPase activating protein (ARF GAP), involved in ER-Golgi transport; shares functional similarity with Glo3p	-0.0359728	-0.0457136	-0.081303	-0.00981905	-0.018851	-0.0135653	0.36038	0.0748617	0.270567
YDL229W	SSB1	Cytoplasmic ATPase that is a ribosome-associated molecular chaperone, functions with J-protein partner Zuo1p; may be involved in folding of newly-made polypeptide chains; member of the HSP70 family; interacts with phosphatase subunit Reg1p	0.0250375	0.0582125	0.0232788	-0.060332	-0.045688	-0.0360673	-0.336653	-0.306797	-0.36029
YDL230W	PTP1	Phosphotyrosine-specific protein phosphatase that dephosphorylates a broad range of substrates in vivo, including Fpr3p; localized to the cytoplasm and the mitochondria	-0.0212731	-0.0922596	0.0550152	0.251938	0.166353	0.221563	0.0026745	0.0469537	-0.0209598
YDL234C	GYP7	GTPase-activating protein for yeast Rab family members including: Ypt7p (most effective), Ypt1p, Ypt31p, and Ypt32p (in vitro); involved in vesicle mediated protein trafficking	-0.0099767	0.0255555	0.0261292	0.0346861	0.0800439	0.00450275	-0.0185581	-0.100121	-0.0724951
YDL235C	YPD1	Phosphorelay intermediate protein, phosphorylated by the plasma membrane sensor Sln1p in response to osmotic stress and then in turn phosphorylates the response regulators Ssk1p in the cytosol and Skn7p in the nucleus	-0.359966	0.0541148	0.0839346	0.340708	0.72429	0.591415	0.364779	-0.0876503	0.658682
YDL236W	PHO13	Alkaline phosphatase specific for p-nitrophenyl phosphate; also has protein phosphatase activity	0.0506422	-0.00361371	0.040406	-0.283771	-0.323521	-0.310524	0.201281	0.0175289	0.114836
YDL237W	AIM6	Putative protein of unknown function, required for respiratory growth; YDL237W is not an essential gene	-0.0312462	0.0850011	0.102451	0.271038	0.127167	0.0742526	0.326082	0.291824	0.350547
YDL240W	LRG1	Putative GTPase-activating protein (GAP) involved in the Pkc1p-mediated signaling pathway that controls cell wall integrity; appears to specifically regulate 1,3-beta-glucan synthesis	0.0231151	-0.0712337	0.110797	-0.0134741	0.0960327	0.0956056	-0.164888	-0.253276	-0.18469
YDR001C	NTH1	Neutral trehalase, degrades trehalose; required for thermotolerance and may mediate resistance to other cellular stresses; may be phosphorylated by Cdc28p	0.0936276	0.0929375	0.000577	-0.0722071	-0.037342	-0.0734561	-0.272954	-0.287743	-0.276587
YDR002W	YRB1	Ran GTPase binding protein; involved in nuclear protein import and RNA export, ubiquitin-mediated protein degradation during the cell cycle; shuttles between the nucleus and cytoplasm; is essential; homolog of human RanBP1	-0.0489955	0.119026	0.050849	0.109742	0.0594923	0.113313	-0.0541118	-0.0977994	-0.102617
YDR004W	RAD57	Protein that stimulates strand exchange by stabilizing the binding of Rad51p to single-stranded DNA; involved in the recombinational repair of double-strand breaks in DNA during vegetative growth and meiosis; forms heterodimer with Rad55p	-0.249257	-0.106994	-0.213632	-0.346463	-0.158822	-0.235551	-0.420075	-0.180348	-0.326679
YDR005C	MAF1	Negative regulator of RNA polymerase III; component of several signaling pathways that repress polymerase III transcription in response to changes in cellular environment; targets the initiation factor TFIIIB	-0.125493	0.000376685	0.0213536	-0.425552	-0.387391	-0.470793	0.0806195	0.0629724	0.083298
YDR006C	SOK1	Protein whose overexpression suppresses the growth defect of mutants lacking protein kinase A activity; involved in cAMP-mediated signaling; localized to the nucleus; similar to the mouse testis-specific protein PBS13	0.153837	0.138951	0.177987	0.298098	0.312585	0.17876	0.0459075	-0.0970055	0.142109
YDR011W	SNQ2	Plasma membrane ATP-binding cassette (ABC) transporter, multidrug transporter involved in multidrug resistance and resistance to singlet oxygen species	0.59164	0.470091	0.426596	0.491057	0.470739	0.451732	0.670196	0.769954	0.76757
YDR012W	RPL4B	Protein component of the large (60S) ribosomal subunit, nearly identical to Rpl4Ap and has similarity to E. coli L4 and rat L4 ribosomal proteins	-0.255823	-0.117597	-0.14225	-0.974497	-0.932274	-0.890004	-0.237074	-0.390419	-0.116751
YDR013W	PSF1	Subunit of the GINS complex (Sld5p, Psf1p, Psf2p, Psf3p), which is localized to DNA replication origins and implicated in assembly of the DNA replication machinery	-0.0410245	-0.0512792	-0.00944	0.299997	0.218323	0.287847	0.143152	-0.143568	0.0680186
YDR017C	KCS1	Inositol hexakisphosphate (IP6) and inositol heptakisphosphate (IP7) kinase; generation of high energy inositol pyrophosphates by Kcs1p is required for many processes such as vacuolar biogenesis, stress response and telomere maintenance	0.0421632	0.0520732	-0.002772	-0.063024	-0.082824	-0.0313516	-0.105571	0.0090171	-0.0446555
YDR019C	GCV1	T subunit of the mitochondrial glycine decarboxylase complex, required for the catabolism of glycine to 5,10-methylene-THF; expression is regulated by levels of levels of 5,10-methylene-THF in the cytoplasm	-0.304654	-0.320912	-0.28773	-1.34182	-1.25648	-1.24904	0.836994	0.988835	1.01118
YDR020C	DAS2	Putative protein of unknown function; non-essential gene identified in a screen for mutants with increased levels of rDNA transcription; weak similarity with uridine kinases and with phosphoribokinases	-0.0850579	0.0412626	0.0845808	-0.0980041	-0.124283	-0.0890813	-0.0587078	0.0032958	0.00178102
YDR021W	FAL1	Nucleolar protein required for maturation of 18S rRNA, member of the eIF4A subfamily of DEAD-box ATP-dependent RNA helicases	-0.0127304	0.119416	0.120035	-0.0737431	-0.073087	-0.103015	0.239931	0.293266	0.300824
YDR023W	SES1	Cytosolic seryl-tRNA synthetase, class II aminoacyl-tRNA synthetase that aminoacylates tRNA(Ser), displays tRNA-dependent amino acid recognition which enhances discrimination of the serine substrate, interacts with peroxin Pex21p	-0.0616459	0.00298201	-0.076523	-0.115212	-0.153018	-0.0895833	-0.0679557	-0.0839983	-0.0551075
YDR025W	RPS11A	Protein component of the small (40S) ribosomal subunit; identical to Rps11Bp and has similarity to E. coli S17 and rat S11 ribosomal proteins	0.199718	0.0897973	0.0443588	0.130715	0.0888133	0.0915422	-0.0500301	-0.315118	-0.162135
YDR026C	YDR026C	Protein of unknown function that may interact with ribosomes, based on co-purification experiments; Myb-like DNA-binding protein that may bind to the Ter region of rDNA; interacts physically with Fob1p	-0.0380896	-0.0718522	0.0628741	-0.0344901	-0.063007	-0.114204	0.0340175	0.11	-0.0006642
YDR027C	VPS54	Component of the GARP (Golgi-associated retrograde protein) complex, Vps51p-Vps52p-Vps53p-Vps54p, which is required for the recycling of proteins from endosomes to the late Golgi; potentially phosphorylated by Cdc28p	0.047501	-0.0898306	-0.028881	0.0917723	0.0241521	0.150503	-0.0409863	-0.0200208	-0.0645331
YDR028C	REG1	Regulatory subunit of type 1 protein phosphatase Glc7p, involved in negative regulation of glucose-repressible genes	0.0671467	0.0423565	0.0400554	-0.118736	-0.032716	-0.0311541	0.0732655	0.100145	0.111526
YDR032C	PST2	Protein with similarity to members of a family of flavodoxin-like proteins; induced by oxidative stress in a Yap1p dependent manner; the authentic, non-tagged protein is detected in highly purified mitochondria in high-throughput studies	-0.0649089	0.018481	-0.057241	0.216083	-0.027689	0.133682	-0.10058	-0.094083	-0.107435
YDR033W	MRH1	Protein that localizes primarily to the plasma membrane, also found at the nuclear envelope; the authentic, non-tagged protein is detected in mitochondria in a phosphorylated state; has similarity to Hsp30p and Yro2p	0.027346	-0.0523505	0.0346879	0.554813	0.341309	0.44524	-0.823732	-0.996411	-0.99749
YDR034C	LYS14	Transcriptional activator involved in regulation of genes of the lysine biosynthesis pathway; requires 2-aminoadipate semialdehyde as co-inducer	-0.12584	-0.10857	-0.027806	-0.220108	-0.21372	-0.190813	-0.411505	-0.263582	-0.16751
YDR035W	ARO3	3-deoxy-D-arabino-heptulosonate-7-phosphate (DAHP) synthase, catalyzes the first step in aromatic amino acid biosynthesis and is feedback-inhibited by phenylalanine or high concentration of tyrosine or tryptophan	-0.440085	-0.331353	-0.326442	-0.690968	-0.845484	-0.878723	-0.450739	-0.52549	-0.484975
YDR036C	EHD3	3-hydroxyisobutyryl-CoA hydrolase, member of a family of enoyl-CoA hydratase/isomerases; non-tagged protein is detected in highly purified mitochondria in high-throughput studies; phosphorylated; mutation affects fluid-phase endocytosis	0.106131	0.0309372	0.116873	0.239549	0.239023	0.133788	-0.0103767	-0.108783	0.0612334
YDR037W	KRS1	Lysyl-tRNA synthetase	-0.156635	-0.0984241	-0.152099	-0.266611	-0.335297	-0.303321	-0.463819	-0.461098	-0.474385
YDR039C	ENA2	P-type ATPase sodium pump, involved in Na+ efflux to allow salt tolerance; likely not involved in Li+ efflux	-0.0773549	-0.102752	-0.109707	-0.0393401	-0.063636	0.0258773	-0.279992	-0.273765	-0.270035
YDR040C	ENA1	P-type ATPase sodium pump, involved in Na+ and Li+ efflux to allow salt tolerance	-0.183855	-0.34478	-0.2912	-0.293363	-0.093548	-0.158865	-0.738452	-0.855556	-0.761156
YDR041W	RSM10	Mitochondrial ribosomal protein of the small subunit, has similarity to E. coli S10 ribosomal protein; essential for viability, unlike most other mitoribosomal proteins	-0.0977979	-0.148913	-0.048913	0.0702289	0.114994	0.00560165	-0.12712	-0.173366	-0.0833154
YDR044W	HEM13	Coproporphyrinogen III oxidase, an oxygen requiring enzyme that catalyzes the sixth step in the heme biosynthetic pathway; transcription is repressed by oxygen and heme (via Rox1p and Hap1p)	0.0756056	0.24216	0.194273	-0.0715921	-0.179036	-0.130928	-0.0557681	-0.0424378	0.00200062
YDR045C	RPC11	RNA polymerase III subunit C11; mediates pol III RNA cleavage activity and is important for termination of transcription; homologous to TFIIS	-0.137943	-0.0407325	-0.082311	-0.0545631	-0.119772	-0.109333	0.11238	0.0576082	0.123494
YDR047W	HEM12	Uroporphyrinogen decarboxylase, catalyzes the fifth step in the heme biosynthetic pathway; localizes to both the cytoplasm and nucleus; a hem12 mutant has phenotypes similar to patients with porphyria cutanea tarda	0.0097307	0.00762994	-0.014598	-0.307549	-0.392474	-0.375633	-0.249486	-0.138051	-0.18157
YDR049W	YDR049W	Zinc finger protein; putative transcription factor that may interact with proteins involved in histone acetylation or deacetylation; may be involved in altering acetylation on histone lysines	0.0170804	-0.0444673	-0.06483	0.0727801	0.0527259	-0.0553727	-0.0748145	-0.0218369	-0.06791
YDR050C	TPI1	Triose phosphate isomerase, abundant glycolytic enzyme; mRNA half-life is regulated by iron availability; transcription is controlled by activators Reb1p, Gcr1p, and Rap1p through binding sites in the 5' non-coding region	0.100513	0.0272741	-0.081605	-0.292363	-0.385026	-0.291419	-0.0696868	-0.196385	-0.0872418
YDR051C	DET1	Acid phosphatase involved in the non-vesicular transport of sterols in both directions between the endoplasmic reticulum and plasma membrane; deletion confers sensitivity to nickel	-0.114313	-0.100761	-0.009718	-0.14552	-0.155128	-0.159568	-0.0026055	-0.0184107	0.0100325
YDR054C	CDC34	Ubiquitin-conjugating enzyme (E2) and catalytic subunit of SCF ubiquitin-protein ligase complex (together with Skp1p, Rbx1p, Cdc53p, and an F-box protein) that regulates cell cycle progression by targeting key substrates for degradation	-0.0071166	0.0482421	0.132831	0.164935	0.0537366	0.24922	0.293022	0.283557	0.291206
YDR055W	PST1	Cell wall protein that contains a putative GPI-attachment site; secreted by regenerating protoplasts; up-regulated by activation of the cell integrity pathway, as mediated by Rlm1p; upregulated by cell wall damage via disruption of FKS1	-0.0885309	-0.113356	-0.236521	-0.148197	-0.027547	0.0758815	-0.434963	-0.508243	-0.514971
YDR056C	YDR056C	Putative protein of unknown function; green fluorescent protein (GFP)-fusion protein localizes to the endoplasmic reticulum; YDR056C is not an essential protein	0.0633146	-0.116407	0.158579	-0.36533	-0.290526	-0.277698	0.0382195	0.0511186	0.0414439
YDR057W	YOS9	ER quality-control lectin; integral subunit of the HRD ligase; binds to glycans with terminal alpha-1,6 linked mannose on misfolded N-glycosylated proteins and participates in targeting proteins to ERAD; member of the OS-9 protein family	-0.0356926	-0.00727312	0.133102	-0.368176	-0.361489	-0.224534	0.0700855	-0.186903	-0.0535948
YDR059C	UBC5	Ubiquitin-conjugating enzyme that mediates selective degradation of short-lived, abnormal, or excess proteins, including histone H3; central component of the cellular stress response; expression is heat inducible	0.159466	-0.0725479	-0.217843	0.119002	0.181339	-0.0653122	-0.757135	-0.905303	-0.598808
YDR060W	MAK21	Constituent of 66S pre-ribosomal particles, required for large (60S) ribosomal subunit biogenesis; involved in nuclear export of pre-ribosomes; required for maintenance of dsRNA virus; homolog of human CAATT-binding protein	0.0877329	0.119354	0.000319	0.0465954	0.0199328	0.0635018	-0.0540207	0.0475264	0.024321
YDR061W	YDR061W	Protein with similarity to ATP-binding cassette (ABC) transporter family members; lacks predicted membrane-spanning regions; transcriptionally activated by Yrm1p along with genes involved in multidrug resistance	-0.0122932	-0.00544051	-0.018822	-0.102427	-0.081283	-0.0323686	0.100074	0.102115	0.124999
YDR062W	LCB2	Component of serine palmitoyltransferase, responsible along with Lcb1p for the first committed step in sphingolipid synthesis, which is the condensation of serine with palmitoyl-CoA to form 3-ketosphinganine	0.039788	0.0135461	0.0811462	-0.0926821	-0.060729	-0.139477	-0.0890482	-0.102494	-0.119961
YDR063W	AIM7	Protein that interacts with Arp2/3 complex to stimulate actin filament debranching and inhibit actin nucleation; has similarity to Cof1p and also to human glia maturation factor (GMF); null mutant displays elevated mitochondrial genome loss	0.0185406	0.0878952	0.179689	0.130574	0.0603504	0.0914602	-0.0677644	-0.125362	-0.0274317
YDR064W	RPS13	Protein component of the small (40S) ribosomal subunit; has similarity to E. coli S15 and rat S13 ribosomal proteins	0.08802	0.0656151	0.0996731	0.237297	0.191336	0.059119	-0.0661897	0.0594539	0.100752
YDR066C	RTR2	Protein of unknown function with high similarity to Rtr1p; exhibits genetic interactions with Rtr1p; green fluorescent protein (GFP)-fusion protein localizes to the cytoplasm; YDR066C is not an essential gene	-0.190593	-0.325489	0.200818	-0.397474	-0.180079	0.0306726	0.0272025	-0.158681	-0.12369
YDR068W	DOS2	Protein of unknown function, green fluorescent protein (GFP)-fusion protein localizes to the cytoplasm	-0.0095403	0.0650676	0.0174394	-0.165714	-0.054117	-0.0969383	0.0696895	-0.0603414	8.89e-05
YDR071C	PAA1	Polyamine acetyltransferase; acetylates polyamines (e.g. putrescine, spermidine, spermine) and also aralkylamines (e.g. tryptamine, phenylethylamine); may be involved in transcription and/or DNA replication	0.0934307	-0.00852951	-0.026904	0.411484	0.318834	0.337762	0.438497	0.333093	0.413527
YDR073W	SNF11	Subunit of the SWI/SNF chromatin remodeling complex involved in transcriptional regulation; interacts with a highly conserved 40-residue sequence of Snf2p	-0.214609	-0.0249147	0.0295915	0.210976	0.0355499	0.166336	0.293817	0.0937277	0.606061
YDR074W	TPS2	Phosphatase subunit of the trehalose-6-phosphate synthase/phosphatase complex, which synthesizes the storage carbohydrate trehalose; expression is induced by stress conditions and repressed by the Ras-cAMP pathway	-0.010213	-0.00131665	-0.01255	0.11968	0.12452	0.130182	-0.353384	-0.392685	-0.362119
YDR075W	PPH3	Catalytic subunit of an evolutionarily conserved protein phosphatase complex containing Psy2p and the regulatory subunit Psy4p; required for cisplatin resistance; involved in activation of Gln3p	0.0136974	0.0865257	0.0851088	0.0777608	0.0488956	-0.00967205	-0.104975	0.0640651	0.0626646
YDR077W	SED1	Major stress-induced structural GPI-cell wall glycoprotein in stationary-phase cells, associates with translating ribosomes, possible role in mitochondrial genome maintenance; ORF contains two distinct variable minisatellites	0.113627	-0.0451161	0.356169	-0.0416381	0.476895	0.228015	-0.705951	-0.409765	-0.239869
YDR079W	PET100	Chaperone that specifically facilitates the assembly of cytochrome c oxidase, integral to the mitochondrial inner membrane; interacts with a subcomplex of subunits VII, VIIa, and VIII (Cox7p, Cox9p, and Cox8p) but not with the holoenzyme	-0.123226	-0.205332	-0.062058	0.097262	0.0154113	0.108005	-0.380182	-0.347376	-0.372778
YDR080W	VPS41	Vacuolar membrane protein that is a subunit of the homotypic vacuole fusion and vacuole protein sorting (HOPS) complex; essential for membrane docking and fusion at the Golgi-to-endosome and endosome-to-vacuole stages of protein transport	-0.115316	-0.0579716	-0.132557	-0.164792	-0.301517	-0.154928	0.0084305	0.0720597	0.020318
YDR081C	PDC2	Transcription factor required for the synthesis of the glycolytic enzyme pyruvate decarboxylase, required for high level expression of both the THI and the PDC genes	0.0647001	-0.100569	-0.01623	-0.180354	-0.034491	-0.03017	0.0861115	0.0561686	0.0532644
YDR083W	RRP8	Nucleolar protein involved in rRNA processing, pre-rRNA cleavage at site A2; also involved in telomere maintenance; mutation is synthetically lethal with a gar1 mutation	-0.0124562	0.0560708	0.0107284	-0.181384	-0.211483	-0.156004	-0.0946981	-0.0679571	-0.178334
YDR084C	TVP23	Integral membrane protein localized to late Golgi vesicles along with the v-SNARE Tlg2p; green fluorescent protein (GFP)-fusion protein localizes to the cytoplasm in a punctate pattern	0.0180431	-0.161917	-0.011666	0.0415533	0.0867852	-0.0459181	0.227875	0.0409133	-0.0395116
YDR086C	SSS1	Subunit of the Sec61p translocation complex (Sec61p-Sss1p-Sbh1p) that forms a channel for passage of secretory proteins through the endoplasmic reticulum membrane, and of the Ssh1p complex (Ssh1p-Sbh2p-Sss1p); interacts with Ost4p and Wbp1p	0.0583553	0.0100561	-0.093376	0.239314	0.0580796	0.297774	-0.0866561	-0.0180411	-0.136097
YDR087C	RRP1	Essential evolutionarily conserved nucleolar protein necessary for biogenesis of 60S ribosomal subunits and processing of pre-rRNAs to mature rRNAs, associated with several distinct 66S pre-ribosomal particles	0.0369533	0.213994	0.188273	0.0838641	-0.024005	0.105677	0.158113	0.143013	0.153128
YDR088C	SLU7	RNA splicing factor, required for ATP-independent portion of 2nd catalytic step of spliceosomal RNA splicing; interacts with Prp18p; contains zinc knuckle domain	-0.0334158	0.101158	0.0521896	0.00387235	0.168291	0.0857539	-0.0487807	0.0815217	-0.0777853
YDR089W	YDR089W	Protein of unknown function; deletion confers resistance to Nickel	0.0166174	-0.133321	-0.083228	-0.0173141	0.0033031	-0.0350379	0.156872	0.0765967	0.125532
YDR091C	RLI1	Essential iron-sulfur protein required for ribosome biogenesis and translation initiation and termination; facilitates binding of a multifactor complex (MFC) of initiation factors to the small ribosomal subunit; predicted ABC family ATPase	-0.0192863	-0.0422638	-0.053399	0.00751355	-0.025243	0.0368431	-0.314289	-0.359678	-0.371956
YDR092W	UBC13	Ubiquitin-conjugating enzyme involved in the error-free DNA postreplication repair pathway; interacts with Mms2p to assemble ubiquitin chains at the Ub Lys-63 residue; DNA damage triggers redistribution from the cytoplasm to the nucleus	-0.156957	-0.0983481	-0.290576	0.161203	-0.090828	0.0252594	-0.0016355	-0.0692446	-0.014643
YDR093W	DNF2	Aminophospholipid translocase (flippase) that localizes primarily to the plasma membrane; contributes to endocytosis, protein transport and cell polarity; type 4 P-type ATPase	0.105283	-0.0475519	0.0609746	-0.185166	-0.199069	-0.0743553	0.386205	0.518119	0.415797
YDR096W	GIS1	JmjC domain-containing histone demethylase; transcription factor involved in expression of genes during nutrient limitation and in negative regulation of DPP1 and PHR1; activity is modulated by limited proteasome-mediated proteolysis	-0.280244	-0.0516786	0.0535474	-0.392887	-0.304379	-0.509215	-0.634337	-0.517724	-0.58949
YDR097C	MSH6	Protein required for mismatch repair in mitosis and meiosis, forms a complex with Msh2p to repair both single-base & insertion-deletion mispairs; potentially phosphorylated by Cdc28p	0.0895338	7.4015e-05	0.027307	0.087699	0.0625827	-0.0379203	-0.124233	-0.139437	-0.0002964
YDR098C	GRX3	Hydroperoxide and superoxide-radical responsive glutathione-dependent oxidoreductase; monothiol glutaredoxin subfamily member along with Grx4p and Grx5p; protects cells from oxidative damage	0.0358672	0.11573	0.139988	0.116066	-0.183418	0.174093	0.228062	0.0631862	0.271482
YDR099W	BMH2	14-3-3 protein, minor isoform; controls proteome at post-transcriptional level, binds proteins and DNA, involved in regulation of many processes including exocytosis, vesicle transport, Ras/MAPK signaling, and rapamycin-sensitive signaling	-0.0719469	-0.112885	-0.064412	0.109357	0.187339	0.0932515	0.0427455	0.0439807	0.110461
YDR101C	ARX1	Shuttling pre-60S factor; involved in the biogenesis of ribosomal large subunit biogenesis; interacts directly with Alb1; responsible for Tif6 recycling defects in absence of Rei1; associated with the ribosomal export complex	0.0614259	0.125135	0.060758	0.0305307	-0.047981	0.0366073	-0.0284044	-0.0180466	-0.0311614
YDR108W	GSG1	Subunit of TRAPPIII (transport protein particle), a multimeric guanine nucleotide-exchange factor for Ypt1p, required for membrane expansion during autophagy and the CVT pathway; directs Ypt1p to the PAS; late post-replication meiotic role	-0.0354137	-0.143458	0.0991352	0.0489736	0.267598	0.191253	0.0263465	0.176748	-0.0864272
YDR109C	YDR109C	Putative kinase	-0.0861789	-0.110493	0.110566	-0.468975	-0.490644	-0.492528	-0.252621	-0.240128	-0.0666109
YDR110W	FOB1	Nucleolar protein that binds the rDNA replication fork barrier (RFB) site; required for replication fork blocking, recombinational hotspot activity, condensin recruitment to RFB and rDNA repeat segregation; related to retroviral integrases	0.0524526	-0.0999391	0.0804452	-0.0104971	-0.068745	-0.173782	-0.0029385	-0.157884	0.0005808
YDR111C	ALT2	Putative alanine transaminase (glutamic pyruvic transaminase)	0.141702	0.285456	0.272382	0.0329188	0.117436	0.171362	-0.231432	-0.24886	-0.346212
YDR115W	YDR115W	Putative mitochondrial ribosomal protein of the large subunit, has similarity to E. coli L34 ribosomal protein; required for respiratory growth, as are most mitochondrial ribosomal proteins	0.148492	-0.0422841	0.047439	0.175391	0.297137	0.380692	0.11674	-0.191262	0.10203
YDR116C	MRPL1	Mitochondrial ribosomal protein of the large subunit	-0.140547	-0.084654	-0.128891	-0.0209071	0.0438426	0.0286064	-0.147107	-0.149799	-0.156246
YDR117C	TMA64	Protein of unknown function that associates with ribosomes; has a putative RNA binding domain; in mammals the corresponding protein, eIF2D, has been shown to possess translation initiation factor activity	0.0534691	0.0647056	0.15216	0.120766	-0.0106368	0.00984205	0.145851	0.156761	0.0911003
YDR118W	APC4	Subunit of the Anaphase-Promoting Complex/Cyclosome (APC/C), which is a ubiquitin-protein ligase required for degradation of anaphase inhibitors, including mitotic cyclins, during the metaphase/anaphase transition	0.0699449	0.125764	0.0760932	0.198904	0.0471608	0.172223	0.210011	0.216514	0.01997
YDR119W	VBA4	Protein of unknown function with proposed role as a basic amino acid permease based on phylogeny; GFP-fusion protein localizes to vacuolar membrane; physical interaction with Atg27p suggests a possible role in autophagy; non-essential gene	-0.401067	-0.155474	-0.204834	-0.400711	-0.378944	-0.324499	0.13761	0.292189	0.083498
YDR119W-A	YDR119W-A	Putative protein of unknown function; may interact with respiratory chain complexes III (ubiquinol-cytochrome c reductase) or IV (cytochrome c oxidase)	-0.410902	-0.437436	-0.252298	-0.300515	-0.234708	-0.0718216	-1.56271	-1.1731	-1.44084
YDR120C	TRM1	tRNA methyltransferase; two forms of the protein are made by alternative translation starts; localizes to both the nucleus and mitochondrion to produce the modified base N2,N2-dimethylguanosine in tRNAs in both compartments	-0.0340588	-0.0277435	-0.001597	-0.184144	-0.188099	-0.159357	-0.155597	-0.199696	-0.229623
YDR121W	DPB4	Shared subunit of DNA polymerase (II) epsilon and of ISW2/yCHRAC chromatin accessibility complex; involved in both chromosomal DNA replication and in inheritance of telomeric silencing	0.032329	0.146478	0.10603	0.268576	0.230637	0.316126	0.322804	0.387138	0.360114
YDR122W	KIN1	Serine/threonine protein kinase involved in regulation of exocytosis; localizes to the cytoplasmic face of the plasma membrane; closely related to Kin2p	0.151615	0.0180215	0.155214	0.261226	0.309957	0.31544	0.273872	0.294462	0.324668
YDR123C	INO2	Component of the heteromeric Ino2p/Ino4p basic helix-loop-helix transcription activator that binds inositol/choline-responsive elements (ICREs), required for derepression of phospholipid biosynthetic genes in response to inositol depletion	0.113234	0.222657	0.234736	0.282673	-0.038162	-0.0852863	0.440657	0.349373	0.299122
YDR127W	ARO1	Pentafunctional arom protein, catalyzes steps 2 through 6 in the biosynthesis of chorismate, which is a precursor to aromatic amino acids	-0.128361	-0.113467	-0.16117	-0.36539	-0.382743	-0.414864	-0.445616	-0.457504	-0.456008
YDR129C	SAC6	Fimbrin, actin-bundling protein; cooperates with Scp1p (calponin/transgelin) in the organization and maintenance of the actin cytoskeleton	0.183422	0.221755	0.15254	-0.0604901	-0.064476	-0.0711425	-0.016674	-0.0162245	-0.0550204
YDR131C	YDR131C	F-box protein, substrate-specific adaptor subunit that recruits substrates to a core ubiquitination complex	-0.0590438	-0.194641	-0.035366	-0.089252	-0.05445	-0.0779275	-0.108649	-0.0477612	-0.087049
YDR135C	YCF1	Vacuolar glutathione S-conjugate transporter of the ATP-binding cassette family, has a role in detoxifying metals such as cadmium, mercury, and arsenite; also transports unconjugated bilirubin; similar to human cystic fibrosis protein CFTR	0.216993	-0.0407034	-0.019718	0.239451	0.150435	0.229955	0.39201	0.405409	0.397646
YDR137W	RGP1	Subunit of a Golgi membrane exchange factor (Ric1p-Rgp1p) that catalyzes nucleotide exchange on Ypt6p	-0.0016913	-0.0427669	-0.046243	0.0116279	-0.06177	-0.0946732	-0.0802564	-0.112504	-0.105808
YDR138W	HPR1	Subunit of THO/TREX complexes that couple transcription elongation with mitotic recombination and with mRNA metabolism and export, subunit of an RNA Pol II complex; regulates lifespan; involved in telomere maintenance; similar to Top1p	-0.0112994	-0.0402356	-0.04785	0.0869833	0.105746	0.0307625	0.0645735	0.102247	0.0389018
YDR139C	RUB1	Ubiquitin-like protein with similarity to mammalian NEDD8; conjugation (neddylation) substrates include the cullins Cdc53p, Rtt101p, and Cul3p; activated by Ula1p and Uba3p (E1 enzyme pair); conjugation mediated by Ubc12p (E2 enzyme)	-0.0625599	-0.0244089	-0.00661	0.0678367	-0.082799	-0.0145324	-0.0221479	-0.032555	-0.08283
YDR140W	MTQ2	S-adenosylmethionine-dependent methyltransferase of the seven beta-strand family; subunit of complex with Trm112p that methylates translation release factor Sup45p (eRF1) in the ternary complex eRF1-eRF3-GTP; similar to E.coli PrmC	0.12557	0.188218	0.075045	0.0659979	0.158319	0.255102	0.37803	0.382796	0.565724
YDR141C	DOP1	Golgi-localized, leucine-zipper domain containing protein; involved in endosome to Golgi transport, organization of the ER, establishing cell polarity, and morphogenesis; detected in highly purified mitochondria in high-throughput studies	0.124861	0.00382304	0.0130719	0.109803	0.119535	0.0419192	0.271647	0.188555	0.246283
YDR142C	PEX7	Peroxisomal signal receptor for the N-terminal nonapeptide signal (PTS2) of peroxisomal matrix proteins; WD repeat protein; defects in human homolog cause lethal rhizomelic chondrodysplasia punctata (RCDP)	0.370658	-0.216436	0.26082	0.26813	0.471318	0.403534	-0.0410588	0.103521	-0.148688
YDR143C	SAN1	Ubiquitin-protein ligase, involved in the proteasome-dependent degradation of aberrant nuclear proteins; contains intrinsically disordered regions that contribute to substrate recognition	-0.204222	0.22246	0.16862	-0.603668	-0.146191	0.140764	0.13065	0.060299	0.0741256
YDR144C	MKC7	GPI-anchored aspartyl protease, member of the yapsin family of proteases involved in cell wall growth and maintenance; shares functions with Yap3p and Kex2p	-0.0270334	-0.172735	-0.123485	0.378512	0.254273	0.12184	-0.185234	-0.375143	-0.303089
YDR145W	TAF12	Subunit (61/68 kDa) of TFIID and SAGA complexes, involved in RNA polymerase II transcription initiation and in chromatin modification, similar to histone H2A	-0.0154572	-0.054588	-0.060802	-0.00065875	-0.04476	0.00116505	-0.0168577	0.0369791	0.0153964
YDR147W	EKI1	Ethanolamine kinase, primarily responsible for phosphatidylethanolamine synthesis via the CDP-ethanolamine pathway; exhibits some choline kinase activity, thus contributing to phosphatidylcholine synthesis via the CDP-choline pathway	0.0208863	-0.0101849	-0.098488	-0.306915	-0.118778	-0.0958652	0.345503	0.377015	0.266625
YDR148C	KGD2	Dihydrolipoyl transsuccinylase, component of the mitochondrial alpha-ketoglutarate dehydrogenase complex, which catalyzes the oxidative decarboxylation of alpha-ketoglutarate to succinyl-CoA in the TCA cycle; phosphorylated	-0.0144	-0.0233032	-0.131088	-0.0211881	-0.110039	-0.0690498	-0.248277	-0.209012	-0.287792
YDR150W	NUM1	Protein required for nuclear migration, localizes to the mother cell cortex and the bud tip; may mediate interactions of dynein and cytoplasmic microtubules with the cell cortex	-0.0215015	-0.0351195	0.0292379	0.0419931	0.0183094	0.0669938	0.0076235	-0.0015694	-0.0027004
YDR151C	CTH1	Member of the CCCH zinc finger family; has similarity to mammalian Tis11 protein, which activates transcription and also has a role in mRNA degradation; may function with Tis11p in iron homeostasis	-0.555103	-0.23743	-0.094851	0.27203	0.547961	0.33077	0.159232	0.155679	0.197053
YDR152W	GIR2	Highly-acidic cytoplasmic RWD domain-containing protein of unknown function; forms a complex with Rbg2p; interacts with Rbg1p and Gcn1p; associates with translating ribosomes; putative intrinsically unstructured protein	-0.0697099	-0.00279811	0.007843	-0.00400995	0.0047574	-0.0709725	0.0461795	-0.000558	0.00204426
YDR153C	ENT5	Protein containing an N-terminal epsin-like domain involved in clathrin recruitment and traffic between the Golgi and endosomes; associates with the clathrin adaptor Gga2p, clathrin adaptor complex AP-1, and clathrin	-0.0608439	0.00211632	-0.002121	-0.130836	-0.1929	-0.232167	-0.266993	-0.255904	-0.397852
YDR155C	CPR1	Cytoplasmic peptidyl-prolyl cis-trans isomerase (cyclophilin), catalyzes the cis-trans isomerization of peptide bonds N-terminal to proline residues; binds the drug cyclosporin A	0.0524249	-0.0700683	-0.193318	0.0225289	-0.12377	-0.0842243	-0.329771	-0.568318	-0.299687
YDR156W	RPA14	RNA polymerase I subunit A14	0.0415333	-0.00964752	0.093391	0.162624	0.0588793	0.107364	0.0001875	-0.0057169	0.0058167
YDR158W	HOM2	Aspartic beta semi-aldehyde dehydrogenase, catalyzes the second step in the common pathway for methionine and threonine biosynthesis; expression regulated by Gcn4p and the general control of amino acid synthesis	-0.446216	-0.436556	-0.441178	-0.906857	-0.913424	-0.934885	-0.776154	-0.85419	-0.822165
YDR159W	SAC3	Nuclear pore-associated protein, required for biogenesis of the small ribosomal subunit; forms a complex with Thp1p that is involved in transcription and in mRNA export from the nucleus	0.172165	-0.10839	-0.026063	0.0885078	0.0277787	-0.0770077	-0.0038575	0.0877047	-0.103238
YDR161W	YDR161W	Putative protein of unknown function; non-essential gene; proposed function in rRNA and ribosome biosynthesis based on transcriptional co-regulation; genetic interactions suggest a role in ER-associated protein degradation (ERAD)	0.135126	0.180016	0.12256	-0.0293561	-0.065638	-0.0378864	0.307285	0.313541	0.279674
YDR162C	NBP2	Protein involved in the HOG (high osmolarity glycerol) pathway, negatively regulates Hog1p by recruitment of phosphatase Ptc1p the Pbs2p-Hog1p complex, found in the nucleus and cytoplasm, contains an SH3 domain that binds Pbs2p	-0.0946879	-0.0940191	-0.041688	0.0773295	-0.032689	-0.00191195	0.236504	0.0951857	0.108109
YDR163W	CWC15	Non-essential protein involved in pre-mRNA splicing, component of a complex containing Cef1p; has similarity to S. pombe Cwf15p	-0.107972	-0.0705995	-0.211923	-0.181562	-0.134729	-0.0306777	0.0965535	0.0576917	0.118419
YDR164C	SEC1	Sm-like protein involved in docking and fusion of exocytic vesicles through binding to assembled SNARE complexes at the membrane; localization to sites of secretion (bud neck and bud tip) is dependent on SNARE function	-0.0350788	-0.116308	0.0228553	0.0331493	0.0228889	0.0170314	0.125778	0.186691	0.206078
YDR165W	TRM82	Subunit of a tRNA methyltransferase complex composed of Trm8p and Trm82p that catalyzes 7-methylguanosine modification of tRNA	-0.0934299	0.0151799	-0.033516	-0.101933	-0.161673	-0.0404031	-0.0348386	-0.0207049	-0.0348274
YDR166C	SEC5	Essential 107kDa subunit of the exocyst complex (Sec3p, Sec5p, Sec6p, Sec8p, Sec10p, Sec15p, Exo70p, and Exo84p), which has the essential function of mediating polarized targeting of secretory vesicles to active sites of exocytosis	0.0120363	0.026801	0.0092491	0.0916026	0.0148463	-0.0302397	0.0755105	0.162519	0.0793095
YDR167W	TAF10	Subunit (145 kDa) of TFIID and SAGA complexes, involved in RNA polymerase II transcription initiation and in chromatin modification	-0.050666	-0.0275437	-0.097576	0.096062	0.054716	0.197334	0.187081	0.220657	0.235996
YDR168W	CDC37	Essential Hsp90p co-chaperone; necessary for passage through the START phase of the cell cycle; stabilizes protein kinase nascent chains and participates along with Hsp90p in their folding	-0.039911	0.0404513	-0.094907	-0.0131731	-0.146697	-0.0196052	0.0313065	0.0854737	0.0509645
YDR169C	STB3	Ribosomal RNA processing element (RRPE)-binding protein involved in the glucose-induced transition from quiescence to growth; restricted to nucleus in quiescent cells, released into cytoplasm after glucose repletion; binds Sin3p	0.0234947	0.2066	0.179236	-0.1611	-0.197155	-0.132441	0.100846	0.0454409	0.102674
YDR170C	SEC7	Guanine nucleotide exchange factor (GEF) for ADP ribosylation factors involved in proliferation of the Golgi, intra-Golgi transport and ER-to-Golgi transport; found in the cytoplasm and on Golgi-associated coated vesicles	0.0975306	0.037664	0.0292865	0.0875175	0.0896556	0.0549135	0.0059855	0.049121	0.0385402
YDR171W	HSP42	Small heat shock protein (sHSP) with chaperone activity; forms barrel-shaped oligomers that suppress unfolded protein aggregation; involved in cytoskeleton reorganization after heat shock	0.5516	0.594388	0.353132	0.617679	0.641286	0.708421	-0.319238	-0.495695	-0.336666
YDR172W	SUP35	Translation termination factor eRF3; altered protein conformation creates the [PSI(+)] prion, a dominant cytoplasmically inherited protein aggregate that alters translational fidelity and creates a nonsense suppressor phenotype	0.019498	0.0437502	0.025556	-0.0631401	-0.097258	-0.0781049	-0.172346	-0.177917	-0.20001
YDR173C	ARG82	Inositol polyphosphate multikinase (IPMK), sequentially phosphorylates Ins(1,4,5)P3 to form Ins(1,3,4,5,6)P5; also has diphosphoinositol polyphosphate synthase activity; regulates arginine-, phosphate-, and nitrogen-responsive genes	-0.215404	-0.435817	-0.197162	0.127383	-0.037888	-0.123477	-0.0347343	-0.139273	-0.181
YDR174W	HMO1	Chromatin associated high mobility group (HMG) family member involved in genome maintenance; rDNA-binding component of the Pol I transcription system; associates with a 5'-3' DNA helicase and Fpr1p, a prolyl isomerase	-0.0382887	0.0386961	-0.052053	0.0616327	0.0541757	0.0401583	-0.0719125	-0.0636168	-0.163522
YDR175C	RSM24	Mitochondrial ribosomal protein of the small subunit	-0.0711089	-0.151976	-0.01861	0.0931281	0.036271	0.0928307	-0.107747	-0.217872	-0.207983
YDR176W	NGG1	Transcriptional regulator involved in glucose repression of Gal4p-regulated genes; component of transcriptional adaptor and histone acetyltransferase complexes, the ADA complex, the SAGA complex, and the SLIK complex	-0.0470176	-0.106915	-0.047985	0.0376468	0.101098	0.0309941	-0.164291	-0.0368509	-0.117835
YDR177W	UBC1	Ubiquitin-conjugating enzyme that mediates selective degradation of short-lived and abnormal proteins; plays a role in vesicle biogenesis and ER-associated protein degradation (ERAD); component of the cellular stress response	0.0445933	0.0252844	0.001494	-0.0260711	0.0144367	0.0451194	0.13471	0.121684	0.124799
YDR178W	SDH4	Membrane anchor subunit of succinate dehydrogenase (Sdh1p, Sdh2p, Sdh3p, Sdh4p), which couples the oxidation of succinate to the transfer of electrons to ubiquinone as part of the TCA cycle and the mitochondrial respiratory chain	-0.373502	-0.392436	-0.414675	-0.0363311	-0.026899	0.0424933	-0.434183	-0.550718	-0.572653
YDR180W	SCC2	Subunit of cohesin loading factor (Scc2p-Scc4p), a complex required for loading of cohesin complexes onto chromosomes; involved in establishing sister chromatid cohesion during DSB repair via histone H2AX; evolutionarily-conserved adherin	0.0665087	-0.0245006	0.318667	0.254571	0.395221	0.198569	0.531825	0.467377	0.330482
YDR182W	CDC1	Putative lipid phosphatase of the endoplasmic reticulum; shows Mn2+ dependence and may affect Ca2+ signaling; mutants display actin and general growth defects and pleiotropic defects in cell cycle progression and organelle distribution	-0.0607949	-0.021557	-0.083058	0.080452	-0.047533	0.146945	0.0554945	0.0301257	0.0334122
YDR183W	PLP1	Protein that interacts with CCT (chaperonin containing TCP-1) complex and has a role in actin and tubulin folding; has weak similarity to phosducins, which are G-protein regulators	0.159593	0.00418773	0.132021	-0.263884	-0.068542	-0.228354	0.171182	0.0435447	0.161561
YDR186C	YDR186C	Putative protein of unknown function; may interact with ribosomes, based on co-purification experiments; green fluorescent protein (GFP)-fusion protein localizes to the cytoplasm	0.443981	0.314042	0.215096	-0.0180751	0.562039	0.17025	0.0535375	0.659986	0.339094
YDR188W	CCT6	Subunit of the cytosolic chaperonin Cct ring complex, related to Tcp1p, essential protein that is required for the assembly of actin and tubulins in vivo; contains an ATP-binding motif	0.0375129	0.113578	0.0335151	0.156684	0.133714	0.221699	-0.0607486	-0.0648007	-0.0956222
YDR189W	SLY1	Hydrophilic protein involved in vesicle trafficking between the ER and Golgi; SM (Sec1/Munc-18) family protein that binds the tSNARE Sed5p and stimulates its assembly into a trans-SNARE membrane-protein complex	0.0617388	0.016565	0.0530513	0.0735875	0.0121516	0.0724429	0.0369725	0.0473971	0.0505891
YDR190C	RVB1	Essential protein involved in transcription regulation; component of chromatin remodeling complexes; required for assembly and function of the INO80 complex; also referred to as pontin; member of the RUVB-like protein family	-0.0150411	0.0539111	0.0833246	-0.0564441	-0.076504	-0.0381685	0.0178145	0.0277103	0.0142712
YDR192C	NUP42	Subunit of the nuclear pore complex (NPC) that localizes exclusively to the cytoplasmic side; involved in RNA export, most likely at a terminal step; interacts with Gle1p	0.0389457	-0.072397	0.110062	0.0951521	0.105621	-0.014603	0.124983	0.0107308	0.105077
YDR194C	MSS116	DEAD-box protein required for efficient splicing of mitochondrial Group I and II introns; non-polar RNA helicase that also facilities strand annealing	-0.0650049	-0.0929904	-0.116526	0.0145552	0.0089767	0.0185502	-0.741057	-0.721337	-0.773076
YDR195W	REF2	RNA-binding protein involved in the cleavage step of mRNA 3'-end formation prior to polyadenylation, and in snoRNA maturation; part of holo-CPF subcomplex APT, which associates with 3'-ends of snoRNA- and mRNA-encoding genes	0.111202	-0.0219496	0.0241738	0.0265098	-0.050186	-0.0232357	-0.167723	-0.109477	-0.22997
YDR196C	CAB5	Probable dephospho-CoA kinase (DPCK) that catalyzes the last step in coenzyme A biosynthesis; null mutant lethality is complemented by E. coli coaE (encoding DPCK); detected in purified mitochondria in high-throughput studies	-0.0877209	-0.078723	0.0730386	0.312794	0.349612	0.164033	0.0363295	-0.110357	-0.0611614
YDR197W	CBS2	Mitochondrial translational activator of the COB mRNA; interacts with translating ribosomes, acts on the COB mRNA 5'-untranslated leader	0.0010592	0.0475605	-0.042102	0.00472595	0.135566	-0.0861272	-0.228094	-0.156473	-0.188034
YDR198C	RKM2	Ribosomal protein lysine methyltransferase, responsible for trimethylation of the lysine residue at position 3 of Rpl12Ap and Rpl12Bp	-0.0072265	0.0357411	0.0575533	0.0112191	0.143151	-0.0365375	0.0536605	-0.0550459	0.106875
YDR200C	VPS64	Protein required for cytoplasm to vacuole targeting of proteins; forms a complex with Far3p and Far7p to Far11p involved in recovery from pheromone-induced cell cycle arrest; mutant has increased aneuploidy tolerance	0.233358	0.0619246	0.132444	-0.0885351	0.184622	0.182049	-0.06567	0.0581772	-0.018591
YDR201W	SPC19	Essential subunit of the Dam1 complex (aka DASH complex), couples kinetochores to the force produced by MT depolymerization thereby aiding in chromosome segregation; also localized to nuclear side of spindle pole body	-0.0341348	-0.0712481	-0.066211	0.0313954	0.0080647	-0.0880643	0.165001	-0.0554907	0.155957
YDR202C	RAV2	Subunit of RAVE (Rav1p, Rav2p, Skp1p), a complex that associates with the V1 domain of the vacuolar membrane (H+)-ATPase (V-ATPase) and promotes assembly and reassembly of the holoenzyme	0.123266	-0.114753	0.24326	0.163718	0.213583	0.0317226	0.171666	0.0794467	0.0276489
YDR204W	COQ4	Protein with a role in ubiquinone (Coenzyme Q) biosynthesis, possibly functioning in stabilization of Coq7p; located on the matrix face of the mitochondrial inner membrane; component of a mitochondrial ubiquinone-synthesizing complex	-0.736423	-0.750788	-0.76338	-0.329001	-0.255555	-0.344002	-0.484386	-0.601097	-0.255512
YDR205W	MSC2	Member of the cation diffusion facilitator family, localizes to the endoplasmic reticulum and nucleus; mutations affect the cellular distribution of zinc and also confer defects in meiotic recombination between homologous chromatids	0.0045443	-0.175315	-0.150869	0.245498	0.196601	0.126616	-0.199174	-0.185741	-0.363929
YDR206W	EBS1	Protein involved in inhibition of translation and nonsense-mediated decay; interacts with cap binding protein Cdc33p and with Nam7p; localizes to P-bodies upon glucose starvation; mRNA abundance regulated by mRNA decay factors	-0.0591159	-0.102567	-0.080765	-0.110569	0.0193114	-0.0821753	-0.322964	-0.156089	-0.271065
YDR207C	UME6	Key transcriptional regulator of early meiotic genes, binds URS1 upstream regulatory sequence, couples metabolic responses to nutritional cues with initiation and progression of meiosis, forms complex with Ime1p, and also with Sin3p-Rpd3p	-0.249037	0.162878	0.335602	-0.337538	-0.397266	0.187286	-0.191285	0.245976	0.035765
YDR208W	MSS4	Phosphatidylinositol-4-phosphate 5-kinase, involved in actin cytoskeleton organization and cell morphogenesis; multicopy suppressor of stt4 mutation	0.0009657	0.0106739	0.008076	0.00493505	-0.0032793	-0.0388023	0.24649	0.234687	0.244782
YDR210W-B	YDR210W-B	Retrotransposon TYA Gag and TYB Pol genes; transcribed/translated as one unit; polyprotein is processed to make a nucleocapsid-like protein (Gag), reverse transcriptase (RT), protease (PR), and integrase (IN); similar to retroviral genes	0.400782	0.473658	0.442282	-0.65329	-0.629592	-0.60587	0.123047	0.060974	0.10348
YDR211W	GCD6	Catalytic epsilon subunit of the translation initiation factor eIF2B, the guanine-nucleotide exchange factor for eIF2; activity subsequently regulated by phosphorylated eIF2; first identified as a negative regulator of GCN4 expression	0.103072	0.0958065	0.10205	-0.121482	-0.074519	-0.114823	-0.0609914	0.0598585	0.0156587
YDR212W	TCP1	Alpha subunit of chaperonin-containing T-complex, which mediates protein folding in the cytosol; involved in actin cytoskeleton maintenance; overexpression in neurons suppresses formation of pathogenic conformations of huntingtin protein	0.108231	0.0939709	0.0789661	0.198261	0.208816	0.272206	0.0110935	-0.0200979	0.071907
YDR213W	UPC2	Sterol regulatory element binding protein, induces transcription of sterol biosynthetic genes and of DAN/TIR gene products; Ecm22p homolog; relocates from intracellular membranes to perinuclear foci on sterol depletion	0.580976	0.205386	0.240472	0.11448	0.130777	0.176033	0.74077	0.732871	0.68607
YDR214W	AHA1	Co-chaperone that binds to Hsp82p and activates its ATPase activity; similar to Hch1p; expression is regulated by stresses such as heat shock	-0.0730909	-0.11458	-0.110387	0.160525	0.118635	0.1089	0.342556	0.298102	0.345993
YDR217C	RAD9	DNA damage-dependent checkpoint protein, required for cell-cycle arrest in G1/S, intra-S, and G2/M; transmits checkpoint signal by activating Rad53p and Chk1p; hyperphosphorylated by Mec1p and Tel1p; potential Cdc28p substrate	0.01428	0.0717184	0.18269	0.0671144	0.190964	0.161258	0.483479	0.557634	0.575594
YDR219C	MFB1	Mitochondria-associated F-box protein involved in maintenance of normal mitochondrial morphology; interacts with Skp1p through the F-box motif; preferentially localizes to the mother cell during budding	-0.138386	-0.053154	-0.0279	0.0112811	-0.060301	-0.116163	0.0512045	0.033171	0.0506686
YDR221W	GTB1	Glucosidase II beta subunit, forms a complex with alpha subunit Rot2p, involved in removal of two glucose residues from N-linked glycans during glycoprotein biogenesis in the ER	-0.0194579	0.0020421	0.036833	0.201918	0.102446	0.105244	-0.0676506	-0.0745998	-0.108691
YDR222W	YDR222W	Protein of unknown function; green fluorescent protein (GFP)-fusion protein localizes to the cytoplasm in a punctate pattern	-0.439081	-0.556973	-0.461423	0.59265	0.371195	0.303693	-0.341765	-0.359205	-0.213851
YDR224C	HTB1	Histone H2B, core histone protein required for chromatin assembly and chromosome function; nearly identical to HTB2; Rad6p-Bre1p-Lge1p mediated ubiquitination regulates transcriptional activation, meiotic DSB formation and H3 methylation	-0.508879	2.74712	-0.257446	3.18732	2.74828	-0.0649345	3.62402	3.645	3.6622
YDR225W	HTA1	Histone H2A, core histone protein required for chromatin assembly and chromosome function; one of two nearly identical subtypes (see also HTA2); DNA damage-dependent phosphorylation by Mec1p facilitates DNA repair; acetylated by Nat4p	-0.0851859	0.164384	0.235176	0.389628	0.415694	0.102024	0.427754	0.465118	0.38384
YDR226W	ADK1	Adenylate kinase, required for purine metabolism; localized to the cytoplasm and the mitochondria; lacks cleavable signal sequence	-0.10336	-0.0415329	-0.292103	-0.336997	-0.50312	-0.418033	-0.138422	-0.411259	-0.134021
YDR227W	SIR4	Silent information regulator that, together with SIR2 and SIR3, is involved in assembly of silent chromatin domains at telomeres and the silent mating-type loci; potentially phosphorylated by Cdc28p; some alleles of SIR4 prolong lifespan	0.0444008	-0.0256253	-0.123405	0.105268	0.04305	-0.128352	0.151939	0.272792	0.269352
YDR228C	PCF11	mRNA 3' end processing factor, essential component of cleavage and polyadenylation factor IA (CF IA), involved in pre-mRNA 3' end processing and in transcription termination; binds C-terminal domain of largest subunit of RNA pol II (Rpo21p)	0.12123	0.0739167	0.106243	0.222721	0.274225	0.301651	-0.0379612	-0.0810216	-0.0660992
YDR229W	IVY1	Phospholipid-binding protein that interacts with both Ypt7p and Vps33p, may partially counteract the action of Vps33p and vice versa, localizes to the rim of the vacuole as cells approach stationary phase	0.0042273	-0.0322129	0.0629401	0.133417	0.297476	0.189445	0.195199	0.215093	0.131814
YDR231C	COX20	Mitochondrial inner membrane protein, required for proteolytic processing of Cox2p and its assembly into cytochrome c oxidase	-0.0100428	-0.0452623	-0.023803	0.0946911	0.0223083	0.0287432	0.201133	0.117002	0.12979
YDR232W	HEM1	5-aminolevulinate synthase, catalyzes the first step in the heme biosynthetic pathway; an N-terminal signal sequence is required for localization to the mitochondrial matrix; expression is regulated by Hap2p-Hap3p	-0.0025045	0.0948142	0.0719924	-0.189885	-0.20447	-0.189208	0.137446	0.153409	0.122354
YDR233C	RTN1	ER membrane protein that interacts with Sey1p to maintain ER morphology; interacts with exocyst subunit Sec6p, with Yip3p, and with Sbh1p; null mutant has an altered ER morphology; member of the RTNLA (reticulon-like A) subfamily	-0.0616459	-0.0402728	-0.110122	-0.142712	-0.22351	-0.11131	-0.399567	-0.619439	-0.541011
YDR234W	LYS4	Homoaconitase, catalyzes the conversion of homocitrate to homoisocitrate, which is a step in the lysine biosynthesis pathway	-0.175709	-0.162841	-0.150567	-0.290763	-0.27934	-0.297801	0.634315	0.711251	0.686096
YDR235W	PRP42	U1 snRNP protein involved in splicing, required for U1 snRNP biogenesis; contains multiple tetriatricopeptide repeats	0.0699325	0.0394735	0.0528987	-0.0619571	-0.064957	-0.104602	-0.0207604	0.0772697	0.00392624
YDR236C	FMN1	Riboflavin kinase, phosphorylates riboflavin to form riboflavin monophosphate (FMN), which is a necessary cofactor for many enzymes; localizes to microsomes and to the mitochondrial inner membrane	0.0052308	-0.166391	-0.061997	0.351237	0.362775	0.527673	0.202785	-0.0162226	0.0561194
YDR237W	MRPL7	Mitochondrial ribosomal protein of the large subunit	-0.0175038	-0.0213437	0.0610526	-0.00277795	0.0987833	0.0123355	-0.100344	-0.168491	-0.133382
YDR238C	SEC26	Essential beta-coat protein of the COPI coatomer, involved in ER-to-Golgi protein trafficking and maintenance of normal ER morphology; shares 43% sequence identity with mammalian beta-coat protein (beta-COP)	0.0156752	0.0472931	-0.027868	-0.0510401	-0.042663	0.00030625	-0.0707757	-0.0032317	-0.0314534
YDR239C	YDR239C	Protein of unknown function that may interact with ribosomes, based on co-purification experiments	0.0396159	0.00917041	-0.06655	-0.109811	0.144699	-0.137961	0.185888	0.463727	0.225842
YDR240C	SNU56	Component of U1 snRNP required for mRNA splicing via spliceosome; yeast specific, no metazoan counterpart; interacts with mRNA in commitment complex	0.236312	0.184351	0.203072	-0.0733861	-0.037559	-0.00674385	0.185	0.0231312	0.17964
YDR242W	AMD2	Putative amidase	-0.103469	-0.376462	-0.276728	-0.40713	-0.247813	-0.50317	-0.0016335	0.258579	0.177103
YDR243C	PRP28	RNA helicase in the DEAD-box family, involved in RNA isomerization at the 5' splice site	0.113042	-0.0105561	0.108576	-0.119909	-0.070862	-0.0622862	-0.124483	0.0176336	-0.104901
YDR244W	PEX5	Peroxisomal membrane signal receptor for the C-terminal tripeptide signal sequence (PTS1) of peroxisomal matrix proteins, required for peroxisomal matrix protein import; also proposed to have PTS1-receptor independent functions	-0.131763	-0.216442	-0.088172	-0.233754	-0.147943	-0.192914	-0.160725	-0.159129	-0.229951
YDR245W	MNN10	Subunit of a Golgi mannosyltransferase complex also containing Anp1p, Mnn9p, Mnn11p, and Hoc1p that mediates elongation of the polysaccharide mannan backbone; membrane protein of the mannosyltransferase family	-0.003678	-0.0601856	-0.021927	-0.0662241	-0.033598	-0.0361086	0.14897	0.10134	0.122794
YDR246W	TRS23	One of 10 subunits of the transport protein particle (TRAPP) complex of the cis-Golgi which mediates vesicle docking and fusion; involved in endoplasmic reticulum (ER) to Golgi membrane traffic; human homolog is TRAPPC4	-0.0693559	0.0859124	0.0473023	0.0518521	-0.099105	-0.0260272	0.329535	0.415282	0.384718
YDR248C	YDR248C	Putative protein of unknown function; sequence similarity to bacterial and human gluconokinase; green fluorescent protein (GFP)-fusion protein localizes to the cytoplasm; upregulated by deletion of the RNAP-II associated factor, PAF1	-0.0660419	-0.0535229	-0.117679	0.299839	0.158891	0.25716	0.0194825	0.0593236	0.113456
YDR251W	PAM1	Essential protein of unknown function; exhibits variable expression during colony morphogenesis; overexpression permits survival without protein phosphatase 2A, inhibits growth, and induces a filamentous phenotype	0.0426304	-0.00535122	0.0138116	-0.0267761	0.0354194	0.0198787	-0.0862198	-0.0502224	-0.0963072
YDR252W	BTT1	Beta3 subunit of the heterotrimeric nascent polypeptide-associated complex which binds ribosomes via its beta-subunits in close proximity to nascent polypeptides; interacts with Caf130p of the CCR4-NOT complex; similar to human BTF3	0.0707918	0.15114	0.271054	0.217557	-0.047191	0.0226511	0.0888665	0.151076	0.187186
YDR257C	RKM4	Ribosomal lysine methyltransferase specific for monomethylation of Rpl42ap and Rpl42bp (lysine 55); nuclear SET-domain containing protein	-0.0490552	-0.0667178	-0.067415	-0.0775081	0.0297688	-0.0143266	-0.0854123	-0.0290796	-0.170732
YDR258C	HSP78	Oligomeric mitochondrial matrix chaperone that cooperates with Ssc1p in mitochondrial thermotolerance after heat shock; able to prevent the aggregation of misfolded proteins as well as resolubilize protein aggregates	0.047798	0.0542351	-0.002541	-0.0837951	0.0010139	-0.0458302	-0.198926	-0.212512	-0.200891
YDR261C	EXG2	Exo-1,3-beta-glucanase, involved in cell wall beta-glucan assembly; may be anchored to the plasma membrane via a glycosylphosphatidylinositol (GPI) anchor	0.0699195	0.0678408	-0.078531	0.236528	0.235345	0.196939	0.159864	0.0573344	0.00968827
YDR262W	YDR262W	Putative protein of unknown function; green fluorescent protein (GFP)-fusion protein localizes to the vacuole and is induced in response to the DNA-damaging agent MMS; gene expression increases in response to Zymoliase treatment	-0.403373	-0.206513	-0.138735	-0.177195	-0.157028	-0.383036	-0.0626882	-0.12344	0.0738417
YDR264C	AKR1	Palmitoyl transferase involved in protein palmitoylation; acts as a negative regulator of pheromone response pathway; required for endocytosis of pheromone receptors; involved in cell shape control; contains ankyrin repeats	0.0616088	-0.0388818	-0.026683	-0.078232	-0.061578	-0.01982	0.209607	0.135362	0.193191
YDR266C	YDR266C	Protein of unknown function that may interact with ribosomes, based on co-purification experiments;green fluorescent protein (GFP)-fusion protein localizes to the cytoplasm; contains a RING finger domain	-0.000115	-0.0296124	0.0400982	-0.0786911	-0.106636	-0.103878	-0.200524	-0.139979	-0.148211
YDR267C	CIA1	WD40 repeat protein involved in assembly of cytosolic and nuclear iron-sulfur proteins; similar to the human Ciao1 protein; YDR267C is an essential gene	0.267143	0.120907	0.253838	-0.0299801	0.0355157	-0.222447	0.206032	0.104344	0.11746
YDR268W	MSW1	Mitochondrial tryptophanyl-tRNA synthetase	0.18827	0.118722	0.258429	-0.0585751	-0.0088249	-0.0641692	-0.258178	-0.275153	-0.211598
YDR270W	CCC2	Cu(+2)-transporting P-type ATPase, required for export of copper from the cytosol into an extracytosolic compartment; has similarity to human proteins involved in Menkes and Wilsons diseases	0.286984	-0.209084	-0.223265	0.457208	-0.038933	0.339824	0.476702	0.341734	0.548377
YDR272W	GLO2	Cytoplasmic glyoxalase II, catalyzes the hydrolysis of S-D-lactoylglutathione into glutathione and D-lactate	-0.158657	-0.0304308	-0.089092	-0.153293	-0.326848	-0.180897	-0.378301	-0.386324	-0.377559
YDR279W	RNH202	Ribonuclease H2 subunit, required for RNase H2 activity; related to human AGS2 that causes Aicardi-Goutieres syndrome	-0.115306	-0.0718069	-0.043648	-0.0242191	-0.03815	-0.0794472	0.0964745	0.0425067	0.151116
YDR280W	RRP45	Exosome non-catalytic core component; involved in 3'-5' RNA processing and degradation in both the nucleus and the cytoplasm; has similarity to E. coli RNase PH and to human hRrp45p (PM/SCL-75, EXOSC9)	0.0297015	-0.055777	-0.047172	-0.0391031	-0.139734	-0.113176	0.178979	0.197625	0.208154
YDR283C	GCN2	Protein kinase, phosphorylates the alpha-subunit of translation initiation factor eIF2 (Sui2p) in response to starvation; activated by uncharged tRNAs and the Gcn1p-Gcn20p complex; contributes to DNA damage checkpoint control	0.0997094	-0.00264608	-0.023787	0.14337	0.100071	0.119204	-0.138184	0.107415	0.12019
YDR284C	DPP1	Diacylglycerol pyrophosphate (DGPP) phosphatase, zinc-regulated vacuolar membrane-associated lipid phosphatase, dephosphorylates DGPP to phosphatidate (PA) and Pi, then PA to diacylglycerol; involved in lipid signaling and cell metabolism	-0.171454	-0.0308599	-0.013607	-0.150187	-0.166963	-0.204291	-0.0752943	-0.0774371	-0.0573392
YDR286C	YDR286C	Putative protein of unknown function; predicted to have thiol-disulfide oxidoreductase active site	-0.0421677	-0.152337	-0.013533	-0.396651	-0.223196	-0.384597	-0.110612	-0.312836	-0.105489
YDR287W	INM2	Inositol monophosphatase, involved in biosynthesis of inositol; enzymatic activity requires magnesium ions and is inhibited by lithium and sodium ions; inm1 inm2 double mutant lacks inositol auxotrophy	0.030159	0.0297885	-0.03137	0.0641237	0.0086374	0.0171257	0.29301	0.242907	0.250169
YDR289C	RTT103	Protein that interacts with exonuclease Rat1p and Rai1p and plays a role in transcription termination by RNA polymerase II, has an RPR domain (carboxy-terminal domain interacting domain); also involved in regulation of Ty1 transposition	-0.0845929	-0.0829101	-0.086229	-0.355873	-0.285859	-0.262072	-0.0306076	-0.0495918	-0.0591641
YDR291W	HRQ1	Putative RecQ helicase; belongs to the widely conserved RecQ family of proteins which are involved in maintaining genomic integrity; similar to the human RecQ4p implicated in Rothmund-Thomson syndrome(RTS)	0.0341687	0.0935445	0.265757	0.487005	0.52425	0.578771	0.514425	0.28098	0.474959
YDR292C	SRP101	Signal recognition particle (SRP) receptor alpha subunit; contain GTPase domains; involved in SRP-dependent protein targeting; interacts with the beta subunit, Srp102p	0.127308	0.0628349	0.0273432	-0.0889951	0.0246834	-0.0161968	0.0975015	0.0733587	0.0698701
YDR293C	SSD1	RNA-binding protein with a role in maintenance of cellular integrity, interacts with components of the TOR pathway; ssd1 mutant of a clinical S. cerevisiae strain displays elevated virulence	-0.0063616	0.0250023	0.0349945	0.0372196	0.159858	0.112792	-0.0448854	0.0682707	-0.0766335
YDR294C	DPL1	Dihydrosphingosine phosphate lyase, regulates intracellular levels of sphingolipid long-chain base phosphates (LCBPs), degrades phosphorylated long chain bases, prefers C16 dihydrosphingosine-l-phosphate as a substrate	-0.145693	-0.0961231	-0.164497	-0.0679431	-0.110435	-0.124846	-0.293038	-0.233609	-0.243404
YDR295C	HDA2	Subunit of a possibly tetrameric trichostatin A-sensitive class II histone deacetylase complex containing an Hda1p homodimer and an Hda2p-Hda3p heterodimer; involved in telomere maintenance	-0.0689279	0.00263708	-0.088755	-0.0636671	0.012842	-0.0658323	-0.0597651	0.0239289	0.0068591
YDR296W	MHR1	Protein involved in homologous recombination in mitochondria; required for recombination-dependent mtDNA partitioning; involved in stimulation of mitochondrial DNA replication in response to oxidative stress	-0.0551426	-0.100746	-0.067998	-0.109739	0.0167597	-0.0288373	-0.0438055	-0.0514	0.0239175
YDR297W	SUR2	Sphinganine C4-hydroxylase, catalyses the conversion of sphinganine to phytosphingosine in sphingolipid biosyntheis	0.227026	0.184768	0.275681	-0.0629811	0.0070437	-0.0640562	0.361966	0.276671	0.355441
YDR298C	ATP5	Subunit 5 of the stator stalk of mitochondrial F1F0 ATP synthase, which is an evolutionarily conserved enzyme complex required for ATP synthesis; homologous to bovine subunit OSCP (oligomycin sensitivity-conferring protein); phosphorylated	-0.181527	-0.0784589	-0.152423	-0.108116	-0.215508	-0.0737887	-0.40852	-0.456655	-0.466502
YDR299W	BFR2	Essential protein that is a component of 90S preribosomes; may be involved in rRNA processing; multicopy suppressor of sensitivity to Brefeldin A; expression is induced during lag phase and also by cold shock	0.0923634	0.155204	0.129184	-0.0256321	-0.064677	-0.0273991	-0.072172	-0.0340778	-0.0844462
YDR300C	PRO1	Gamma-glutamyl kinase, catalyzes the first step in proline biosynthesis	-0.0281846	0.00668715	-0.017353	-0.160665	-0.22478	-0.114443	0.117651	0.113575	0.0936963
YDR301W	CFT1	RNA-binding subunit of the mRNA cleavage and polyadenylation factor; involved in poly(A) site recognition and required for both pre-mRNA cleavage and polyadenylation, 51% sequence similarity with mammalian AAUAA-binding subunit of CPSF	0.0815156	-0.123659	-0.080785	-0.121261	0.109228	0.12942	0.144573	0.214481	0.266164
YDR303C	RSC3	Component of the RSC chromatin remodeling complex; essential gene required for maintenance of proper ploidy and regulation of ribosomal protein genes and the cell wall/stress response; highly similar to Rsc30p	0.0285839	-0.0130188	-0.036343	-0.0117191	-0.076144	-0.00156965	-0.160868	-0.0804281	-0.0653407
YDR304C	CPR5	Peptidyl-prolyl cis-trans isomerase (cyclophilin) of the endoplasmic reticulum, catalyzes the cis-trans isomerization of peptide bonds N-terminal to proline residues; transcriptionally induced in response to unfolded proteins in the ER	-0.0253126	0.132694	-0.027028	0.0484253	0.0052756	0.104333	0.0282055	-0.094639	-0.0091712
YDR305C	HNT2	Dinucleoside triphosphate hydrolase; has similarity to the tumor suppressor FHIT and belongs to the histidine triad (HIT) superfamily of nucleotide-binding proteins	-0.224574	-0.105329	-0.101678	0.0167652	0.237266	-0.0228553	0.0205645	0.0423626	0.137765
YDR307W	YDR307W	Putative protein of unknown function	0.385699	0.00697517	0.102105	-0.66944	-0.106233	-0.54914	0.214779	-0.167324	0.103477
YDR308C	SRB7	Subunit of the RNA polymerase II mediator complex; associates with core polymerase subunits to form the RNA polymerase II holoenzyme; essential for transcriptional regulation; target of the global repressor Tup1p	0.0022018	-0.0109253	0.127412	-0.084088	0.164447	0.0402206	0.336986	0.396502	0.326618
YDR310C	SUM1	Transcriptional repressor required for mitotic repression of middle sporulation-specific genes; also acts as general replication initiation factor; involved in telomere maintenance, chromatin silencing; regulated by pachytene checkpoint	-0.002347	-0.0244187	-0.015295	-0.0448831	0.0022266	-0.00297385	-0.16465	0.0175191	6.1e-06
YDR311W	TFB1	Subunit of TFIIH and nucleotide excision repair factor 3 complexes, required for nucleotide excision repair, target for transcriptional activators	0.0775927	-0.0833298	-0.03171	-0.00322315	0.0193937	-0.0377796	-0.176581	-0.223806	-0.188716
YDR312W	SSF2	Protein required for ribosomal large subunit maturation, functionally redundant with Ssf1p; member of the Brix family	0.187163	0.219217	0.213722	0.0828092	0.157983	0.0686161	0.140932	0.169367	0.142231
YDR313C	PIB1	RING-type ubiquitin ligase of the endosomal and vacuolar membranes, binds phosphatidylinositol(3)-phosphate; contains a FYVE finger domain	0.0119832	0.00264137	0.18944	-0.0963121	-0.102001	-0.25722	-0.217134	-0.361104	-0.207348
YDR316W	OMS1	Protein integral to the mitochondrial membrane; has a conserved methyltransferase motif; multicopy suppressor of respiratory defects caused by OXA1 mutations	-0.155834	-0.111644	-0.114385	-0.105372	-0.146111	-0.064037	-0.329533	-0.287031	-0.314785
YDR320C	SWA2	Auxilin-like protein involved in vesicular transport; clathrin-binding protein required for uncoating of clathrin-coated vesicles	-0.0171918	0.0470976	0.180887	-0.126273	0.0237576	0.0354409	0.192299	0.194546	0.18419
YDR321W	ASP1	Cytosolic L-asparaginase, involved in asparagine catabolism	0.0401641	0.0823459	0.0427597	-0.0454201	-0.068583	-0.00737485	-0.15023	-0.166698	-0.20966
YDR322C-A	TIM11	Subunit e of mitochondrial F1F0-ATPase, which is a large, evolutionarily conserved enzyme complex required for ATP synthesis; essential for the dimeric and oligomeric state of ATP synthase	-0.177888	-0.211328	-0.13447	-0.256935	-0.059706	-0.177827	-0.494681	-0.607602	-0.538669
YDR322W	MRPL35	Mitochondrial ribosomal protein of the large subunit	-0.1607	-0.185809	-0.171102	-0.0768911	-0.214722	-0.152606	-0.237313	-0.259257	-0.301275
YDR324C	UTP4	Subunit of U3-containing 90S preribosome and Small Subunit (SSU) processome complexes involved in production of 18S rRNA and assembly of small ribosomal subunit; member of t-Utp subcomplex involved with transcription of 35S rRNA transcript	0.158049	0.132733	0.143911	-0.139955	-0.039833	-0.0187194	-0.134	-0.0400133	-0.108335
YDR326C	YSP2	Protein involved in programmed cell death; mutant shows resistance to cell death induced by amiodarone or intracellular acidification	-0.115224	-0.125602	-0.010797	0.118359	0.0412592	-0.0607457	-0.112408	0.0492282	-0.0770841
YDR328C	SKP1	Evolutionarily conserved kinetochore protein that is part of multiple protein complexes, including the SCF ubiquitin ligase complex, the CBF3 complex that binds centromeric DNA, and the RAVE complex that regulates assembly of the V-ATPase	-0.0210352	0.0554901	0.0596197	0.0859409	0.12167	0.111451	0.138469	0.119697	0.270912
YDR329C	PEX3	Peroxisomal membrane protein (PMP) required for proper localization and stability of PMPs; anchors peroxisome retention factor Inp1p at the peroxisomal membrane; interacts with Pex19p	0.007359	-0.0518515	-0.245251	-0.172151	-0.170033	-0.199138	-0.143312	-0.0712611	-0.0489312
YDR330W	UBX5	UBX (ubiquitin regulatory X) domain-containing protein that interacts with Cdc48p	-0.0435198	0.0481944	-0.001957	0.084075	0.125382	0.145141	-0.177639	-0.230245	-0.238708
YDR331W	GPI8	ER membrane glycoprotein subunit of the glycosylphosphatidylinositol transamidase complex that adds glycosylphosphatidylinositol (GPI) anchors to newly synthesized proteins; human PIG-K protein is a functional homolog	-0.0088389	-0.0965301	-0.000945	-0.0341461	-0.019033	-0.0242359	0.189878	0.189776	0.132115
YDR333C	YDR333C	Putative protein of unknown function	-0.045629	-0.0779555	-0.068206	0.0797118	0.029064	0.13633	-0.133154	-0.0954396	-0.0684333
YDR334W	SWR1	Swi2/Snf2-related ATPase that is the structural component of the SWR1 complex, which exchanges histone variant H2AZ (Htz1p) for chromatin-bound histone H2A	-0.016438	-0.0298802	0.0598757	0.166134	0.499536	0.355129	0.182458	0.12211	0.159017
YDR335W	MSN5	Karyopherin involved in nuclear import and export of proteins, including import of replication protein A and export of Swi6p, Far1p, and Pho4p; required for re-export of mature tRNAs after their retrograde import from the cytoplasm	0.219559	0.0738651	0.0130955	0.462232	0.364788	0.304819	0.180367	0.246328	0.193641
YDR336W	YDR336W	Putative protein of unknown function; sumoylated under stress conditions in a genome wide study; YDR336W is not an essential gene	-0.148643	-0.154687	-0.036048	-0.470788	-0.449728	-0.458216	-0.456097	-0.388961	-0.287562
YDR337W	MRPS28	Mitochondrial ribosomal protein of the small subunit	-0.0882669	-0.100199	-0.078103	0.0476424	0.0478002	0.0275554	-0.28471	-0.300243	-0.320503
YDR339C	FCF1	Putative PINc domain nuclease required for early cleavages of 35S pre-rRNA and maturation of 18S rRNA; component of the SSU (small subunit) processome involved in 40S ribosomal subunit biogenesis; copurifies with Faf1p	-0.0181608	0.0788883	0.107068	-0.16786	-0.028742	-0.15938	-0.173931	-0.160271	-0.147973
YDR341C	YDR341C	Arginyl-tRNA synthetase, proposed to be cytoplasmic but the authentic, non-tagged protein is detected in highly purified mitochondria in high-throughput studies	-0.125538	-0.0987771	-0.150047	-0.364732	-0.387532	-0.402396	-0.380764	-0.378257	-0.383824
YDR343C	HXT6	High-affinity glucose transporter of the major facilitator superfamily, nearly identical to Hxt7p, expressed at high basal levels relative to other HXTs, repression of expression by high glucose requires SNF3	-2.63679	-2.42737	-2.47513	-0.556508	-0.586784	-0.625759	-2.17514	-2.00873	-1.93106
YDR345C	HXT3	Low affinity glucose transporter of the major facilitator superfamily, expression is induced in low or high glucose conditions	0.31753	0.129402	0.0642335	0.340014	0.187388	0.310831	0.126663	0.011194	-0.0207291
YDR346C	SVF1	Protein with a potential role in cell survival pathways, required for the diauxic growth shift; expression in mammalian cells increases survival under conditions inducing apoptosis; mutant has increased aneuploidy tolerance	0.0916135	0.070511	0.123302	0.160321	0.120588	0.14177	0.189197	0.127888	0.189727
YDR347W	MRP1	Mitochondrial ribosomal protein of the small subunit; MRP1 exhibits genetic interactions with PET122, encoding a COX3-specific translational activator, and with PET123, encoding a small subunit mitochondrial ribosomal protein	-0.0919519	-0.10752	-0.169036	-0.0989951	-0.148855	-0.00160195	-0.0516582	-0.0163169	0.0297032
YDR348C	YDR348C	Protein of unknown function; green fluorescent protein (GFP)-fusion protein localizes to the cell periphery and bud neck; potential Cdc28p substrate	-0.035295	0.0147233	-0.008948	-0.144463	-0.04447	-0.0462328	-0.117717	-0.0557864	-0.126428
YDR352W	YDR352W	Putative protein of unknown function	-0.264573	-0.0596743	-0.121529	-0.0631411	-0.246561	-0.277007	-0.0102374	0.39729	0.407779
YDR353W	TRR1	Cytoplasmic thioredoxin reductase, key regulatory enzyme that determines the redox state of the thioredoxin system, which acts as a disulfide reductase system and protects cells against both oxidative and reductive stress	-0.0233758	0.096289	-0.037529	0.0100552	-0.053314	0.0458624	-0.318125	-0.300315	-0.287696
YDR354W	TRP4	Anthranilate phosphoribosyl transferase of the tryptophan biosynthetic pathway, catalyzes the phosphoribosylation of anthranilate, subject to the general control system of amino acid biosynthesis	-0.250966	-0.176121	-0.218703	-0.675087	-0.739222	-0.613226	-0.218676	-0.274863	-0.239957
YDR356W	SPC110	Inner plaque spindle pole body (SPB) component, ortholog of human kendrin; involved in connecting nuclear microtubules to SPB; interacts with Tub4p-complex and calmodulin; phosphorylated by Mps1p in cell cycle-dependent manner	0.0611063	0.0460531	0.0494375	0.144359	0.123305	0.151997	0.0059305	-0.0075057	-0.0318923
YDR357C	YDR357C	Protein of unknown function; likely member of BLOC complex involved in endosomal cargo sorting; null mutant is sensitive to drug inducing secretion of vacuolar cargo; green fluorescent protein (GFP)-fusion protein localizes to the cytoplasm	0.028445	-0.113361	0.241451	-0.307745	0.0189845	-0.225564	-0.0736188	0.121962	0.118597
YDR358W	GGA1	Golgi-localized protein with homology to gamma-adaptin, interacts with and regulates Arf1p and Arf2p in a GTP-dependent manner in order to facilitate traffic through the late Golgi	0.134264	0.0444867	0.0565455	0.135893	0.217528	0.167787	0.10469	0.0859167	0.0943325
YDR359C	EAF1	Component of the NuA4 histone acetyltransferase complex; acts as a platform for assembly of NuA4 subunits into the native complex; required for initiation of pre-meiotic DNA replication, likely due to its requirement for expression of IME1	0.0295097	-0.0947891	-0.175608	0.00421765	0.0072615	0.0249519	-0.0969748	0.01119	-0.0452222
YDR361C	BCP1	Essential protein involved in nuclear export of Mss4p, which is a lipid kinase that generates phosphatidylinositol 4,5-biphosphate and plays a role in actin cytoskeleton organization and vesicular transport	0.00924	0.102846	0.069542	0.0130292	0.0315734	-0.0400591	0.197419	0.168102	0.162449
YDR362C	TFC6	One of six subunits of RNA polymerase III transcription initiation factor complex (TFIIIC); part of TFIIIC TauB domain that binds BoxB promoter sites of tRNA and other genes; cooperates with Tfc3p in DNA binding; human homolog is TFIIIC-110	0.288233	0.38197	0.35705	0.344566	0.752385	0.608102	0.409076	-0.392951	0.598766
YDR364C	CDC40	Pre-mRNA splicing factor, important for catalytic step II of pre-mRNA splicing and plays a role in cell cycle progression; required for DNA synthesis during mitosis and meiosis; has WD repeats	0.0189951	-0.120443	0.120523	0.212656	0.133406	-0.00947325	-0.0424035	-0.435334	-0.153624
YDR365C	ESF1	Nucleolar protein involved in pre-rRNA processing; depletion causes severely decreased 18S rRNA levels	0.0174677	0.117632	0.0573584	-0.199853	-0.191254	-0.138863	-0.257881	-0.235095	-0.27388
YDR367W	YDR367W	Component of inositol phosphorylceramide (IPC) synthase; forms a complex with Aur1p and regulates its activity; required for IPC synthase complex localization to the Golgi; post-translationally processed by Kex2p; KEI1 is an essential gene	0.0158441	-0.0916185	-0.021462	-0.127756	-0.093197	-0.0514011	0.142032	0.156262	0.139816
YDR368W	YPR1	NADPH-dependent aldo-keto reductase, reduces multiple substrates including 2-methylbutyraldehyde and D,L-glyceraldehyde, expression is induced by osmotic and oxidative stress; functionally redundant with other aldo-keto reductases	0.292737	0.191444	0.0457842	-0.258118	-0.296701	-0.251514	-0.108574	-0.315819	-0.101835
YDR372C	VPS74	Protein required for Golgi localization of glycosyltransferases; binds the cytosolic domains of Golgi glycosyltransferases; binding to PtdIns4P required for Golgi targeting and function; tetramer formation required for function	-0.0174797	0.0294119	-0.038737	-0.115617	0.0396165	-0.111367	-0.0144098	-0.0607547	-0.0684184
YDR373W	FRQ1	N-myristoylated calcium-binding protein that may have a role in intracellular signaling through its regulation of the phosphatidylinositol 4-kinase Pik1p; member of the recoverin/frequenin branch of the EF-hand superfamily	0.0452698	0.186672	0.207498	0.0649565	0.138687	0.114972	0.188413	0.163402	0.137254
YDR375C	BCS1	Mitochondrial protein of the AAA ATPase family; has ATP-dependent chaperone activity; required for assembly of Rip1p and Qcr10p into cytochrome bc(1) complex; mutations in human homolog BCS1L are linked to neonatal mitochondrial diseases	-0.186867	-0.0857495	-0.147736	0.237609	0.216225	0.134962	-0.507829	-0.522196	-0.357776
YDR376W	ARH1	Oxidoreductase of the mitochondrial inner membrane, involved in cytoplasmic and mitochondrial iron homeostasis and required for activity of Fe-S cluster-containing enzymes; one of the few mitochondrial proteins essential for viability	0.0365348	0.0689188	0.0388536	0.190468	0.114068	0.144523	-0.339106	-0.369063	-0.381665
YDR377W	ATP17	Subunit f of the F0 sector of mitochondrial F1F0 ATP synthase, which is a large, evolutionarily conserved enzyme complex required for ATP synthesis	-0.278742	0.000622855	-0.356518	-0.139729	-0.431642	-0.0937823	-0.558169	-0.568727	-0.68186
YDR378C	LSM6	Lsm (Like Sm) protein; part of heteroheptameric complexes (Lsm2p-7p and either Lsm1p or 8p): cytoplasmic Lsm1p complex involved in mRNA decay; nuclear Lsm8p complex part of U6 snRNP and possibly involved in processing tRNA, snoRNA, and rRNA	-0.0028341	0.0525351	0.0227181	0.0122438	0.0273709	0.16947	0.246581	0.159928	0.230131
YDR379C-A	YDR379C-A	Protein involved in the assembly of the mitochondrial succinate dehydrogenase complex; mutations in human ortholog SDHAF1 are associated with infantile leukoencephalopathy	0.0860013	0.111131	0.086196	0.484256	0.259461	0.425332	-0.0576764	-0.118052	-0.196065
YDR379W	RGA2	GTPase-activating protein for the polarity-establishment protein Cdc42p; implicated in control of septin organization, pheromone response, and haploid invasive growth; regulated by Pho85p and Cdc28p	0.258817	0.160151	0.103226	0.0164365	0.178529	0.12929	0.0058695	0.0632428	-0.0367083
YDR380W	ARO10	Phenylpyruvate decarboxylase, catalyzes decarboxylation of phenylpyruvate to phenylacetaldehyde, which is the first specific step in the Ehrlich pathway	0.691428	0.674774	0.666695	2.70817	2.54952	2.71786	-0.466152	-0.500264	-0.48486
YDR381W	YRA1	RNA binding protein required for export of poly(A)+ mRNA from the nucleus; proposed to couple mRNA export with 3' end processing via its interactions with Mex67p and Pcf11p; functionally redundant with Yra2p, another REF family member	-0.0509423	-0.0301426	-0.054774	-0.0502201	-0.081753	0.0157387	0.250652	0.248614	0.170926
YDR382W	RPP2B	Ribosomal protein P2 beta, a component of the ribosomal stalk, which is involved in the interaction between translational elongation factors and the ribosome; regulates the accumulation of P1 (Rpp1Ap and Rpp1Bp) in the cytoplasm	-0.0398514	-0.0222725	0.0608886	-0.0118491	0.0874665	0.0656036	0.0185885	-0.0726771	0.0251131
YDR383C	NKP1	Non-essential kinetochore protein, subunit of the Ctf19 central kinetochore complex (Ctf19p-Mcm21p-Okp1p-Mcm22p-Mcm16p-Ctf3p-Chl4p-Mcm19p-Nkp1p-Nkp2p-Ame1p-Mtw1p)	-0.191334	-0.119648	-0.098227	-0.129971	-0.0064503	-0.0889233	0.15348	-0.0354116	-0.0207411
YDR384C	ATO3	Plasma membrane protein, regulation pattern suggests a possible role in export of ammonia from the cell; phosphorylated in mitochondria; member of the TC 9.B.33 YaaH family of putative transporters	-0.017001	-0.0972921	-0.063162	0.237181	-0.1683	-0.00463135	-0.0588961	-0.0296329	0.0160069
YDR386W	MUS81	Subunit of the structure-specific Mms4p-Mus81p endonuclease that cleaves branched DNA; involved in DNA repair, replication fork stability, and joint molecule formation/resolution during meiotic recombination; helix-hairpin-helix protein	-0.0782569	-0.137163	-0.25145	0.200597	0.169518	0.117163	-0.243717	-0.116765	-0.277355
YDR388W	RVS167	Actin-associated protein, interacts with Rvs161p to regulate actin cytoskeleton, endocytosis, and viability following starvation or osmotic stress; homolog of mammalian amphiphysin	-0.0346698	0.0524906	0.0345613	0.107048	-0.050457	-0.0358485	0.0452535	0.119025	0.0544538
YDR389W	SAC7	GTPase activating protein (GAP) for Rho1p, involved in signaling to the actin cytoskeleton, null mutations suppress tor2 mutations and temperature sensitive mutations in actin; potential Cdc28p substrate	-0.0355065	0.0871499	0.004471	0.0415504	0.0917371	0.104912	-0.0669955	0.0869737	-0.0765122
YDR390C	UBA2	Subunit of a heterodimeric nuclear SUMO activating enzyme (E1) with Aos1p; activates Smt3p (SUMO) before its conjugation to proteins (sumoylation), which may play a role in protein targeting; essential for viability	-0.0075009	0.000738665	0.0815497	-0.105815	-0.067266	-0.161099	-0.128225	-0.100995	-0.0755849
YDR391C	YDR391C	Putative protein of unknown function, possibly involved in zinc homeostasis; Bdf1p-dependent transcription induced by salt stress; green fluorescent protein (GFP)-fusion protein localizes to both the cytoplasm and the nucleus	0.142155	-0.078601	-0.10559	-0.235285	-0.060002	-0.144918	-0.541212	-0.932591	-0.500253
YDR393W	SHE9	Mitochondrial inner membrane protein required for normal mitochondrial morphology, may be involved in fission of the inner membrane; forms a homo-oligomeric complex	-0.0115944	-0.149817	0.0676674	-0.208202	-0.115974	-0.35526	-0.208624	0.0031611	-0.228667
YDR394W	RPT3	One of six ATPases of the 19S regulatory particle of the 26S proteasome involved in the degradation of ubiquitinated substrates; substrate of N-acetyltransferase B	0.0164931	-0.000317505	-0.016005	0.219736	0.127486	0.245228	0.132667	0.0933757	0.133216
YDR395W	SXM1	Nuclear transport factor (karyopherin) involved in protein transport between the cytoplasm and nucleoplasm; similar to Nmd5p, Cse1p, Lph2p, and the human cellular apoptosis susceptibility protein, CAS1	-0.0062393	-0.049465	-0.001028	-0.111425	-0.165432	-0.141083	-0.0317198	0.0366154	0.029846
YDR397C	NCB2	Subunit of a heterodimeric NC2 transcription regulator complex with Bur6p; complex binds to TBP and can repress transcription by preventing preinitiation complex assembly or stimulate activated transcription; homologous to human NC2beta	0.0009614	-0.00318472	0.003549	-0.0241891	-0.030463	0.0370436	0.418119	0.529016	0.432326
YDR398W	UTP5	Subunit of U3-containing Small Subunit (SSU) processome complex involved in production of 18S rRNA and assembly of small ribosomal subunit	0.15745	0.0907646	0.0848121	-0.0369231	-0.0059063	-0.0811813	0.111028	0.143949	0.101953
YDR399W	HPT1	Dimeric hypoxanthine-guanine phosphoribosyltransferase, catalyzes the formation of both inosine monophosphate and guanosine monophosphate; mutations in the human homolog HPRT1 can cause Lesch-Nyhan syndrome and Kelley-Seegmiller syndrome	0.0333763	0.0816626	0.0228334	-0.285301	-0.072092	-0.0872773	0.0992595	-0.0425095	0.13148
YDR400W	URH1	Uridine nucleosidase (uridine-cytidine N-ribohydrolase), cleaves N-glycosidic bonds in nucleosides; involved in the pyrimidine salvage and nicotinamide riboside salvage pathways	0.278649	0.193653	0.188291	-0.137653	-0.0041775	-0.122346	0.232346	-0.107141	0.321492
YDR404C	RPB7	RNA polymerase II subunit B16; forms two subunit dissociable complex with Rpb4p; involved in recruitment of 3'-end processing factors to transcribing RNA polymerase II complex and in export of mRNA to cytoplasm under stress conditions	-0.0645889	0.0559617	0.114955	0.296573	0.185172	0.154122	0.355769	0.408484	0.45134
YDR405W	MRP20	Mitochondrial ribosomal protein of the large subunit	-0.0878549	-0.121562	-0.156239	-0.0167521	-0.114538	-0.0263654	-0.113558	-0.159043	-0.112223
YDR407C	TRS120	One of 10 subunits of the transport protein particle (TRAPP) complex of the cis-Golgi which mediates vesicle docking and fusion; involved in endoplasmic reticulum (ER) to Golgi membrane traffic	-0.0157068	-0.00264803	-0.048224	-0.154381	0.282141	0.147854	0.0949395	0.0988197	0.120553
YDR408C	ADE8	Phosphoribosyl-glycinamide transformylase, catalyzes a step in the 'de novo' purine nucleotide biosynthetic pathway	-0.224385	-0.178471	-0.472694	-0.556579	-0.658596	-0.721265	-0.108973	-0.696294	-0.0955202
YDR411C	DFM1	ER localized derlin-like family member involved in ER stress and homeostasis; not involved in ERAD or substrate retrotranslocation; interacts with CDC48; contains four transmembrane domains and two SHP boxes	0.130479	0.0337089	-0.011441	-0.102117	-0.225389	-0.177039	0.11639	0.0677577	0.0802106
YDR412W	RRP17	Component of the pre-60S pre-ribosomal particle; required for cell viability under standard (aerobic) conditions but not under anaerobic conditions; exonuclease required for 5&#8242; end processing of pre-60S ribosomal RNA	0.0025941	0.0485827	0.0619489	-0.149829	-0.237023	-0.184434	0.0088565	0.0463721	0.0484512
YDR414C	ERD1	Predicted membrane protein required for the retention of lumenal endoplasmic reticulum proteins; mutants secrete the endogenous ER protein, BiP (Kar2p)	0.326533	-0.0579096	0.246124	0.300688	0.0259139	-0.0655534	0.188938	0.0703907	0.0247528
YDR415C	YDR415C	Putative protein of unknown function	-0.0844339	-0.00725071	-0.043893	-0.207837	0.1309	-0.0142533	0.295365	0.400748	0.438261
YDR416W	SYF1	Member of the NineTeen Complex (NTC) that contains Prp19p and stabilizes U6 snRNA in catalytic forms of the spliceosome containing U2, U5, and U6 snRNAs; null mutant has splicing defect and arrests in G2/M; homologs in human and C. elegans	-0.0395906	-0.181516	-0.156666	-0.406964	-0.149131	-0.139616	-0.0625615	-0.145595	-0.0852754
YDR419W	RAD30	DNA polymerase eta, involved in translesion synthesis during post-replication repair; catalyzes the synthesis of DNA opposite cyclobutane pyrimidine dimers and other lesions; mutations in human pol eta are responsible for XPV	0.174868	0.219445	-0.032259	0.0158559	0.366488	0.213489	0.0706665	-0.0154165	0.157063
YDR422C	SIP1	Alternate beta-subunit of the Snf1p kinase complex, may confer substrate specificity; vacuolar protein containing KIS (Kinase-Interacting Sequence) and ASC (Association with Snf1 kinase Complex) domains involved in protein interactions	-0.111228	-0.107609	-0.009549	0.0257526	-0.089873	-0.0636609	-0.318499	-0.221653	-0.370447
YDR423C	CAD1	AP-1-like basic leucine zipper (bZIP) transcriptional activator involved in stress responses, iron metabolism, and pleiotropic drug resistance; controls a set of genes involved in stabilizing proteins; binds consensus sequence TTACTAA	-0.190418	0.029556	0.40743	0.586128	0.313116	0.34594	0.540411	0.515431	0.440389
YDR424C	DYN2	Cytoplasmic light chain dynein, microtubule motor protein; proposed to be involved in the assembly of the nuclear pore complex	0.0330529	0.0859237	0.0526031	0.0822333	0.020902	0.090067	0.136657	0.0753887	0.103581
YDR425W	SNX41	Sorting nexin, involved in the retrieval of late-Golgi SNAREs from the post-Golgi endosome to the trans-Golgi network; interacts with Snx4p	0.225646	0.344643	0.181801	0.327165	0.47875	0.374843	-0.0307125	-0.113352	0.0621253
YDR427W	RPN9	Non-ATPase regulatory subunit of the 26S proteasome, has similarity to putative proteasomal subunits in other species; null mutant is temperature sensitive and exhibits cell cycle and proteasome assembly defects	0.0078233	0.0589046	-0.005432	0.174455	0.17514	0.208816	0.123884	0.178899	0.187773
YDR428C	BNA7	Formylkynurenine formamidase, involved in the de novo biosynthesis of NAD from tryptophan via kynurenine	0.121776	0.0455753	0.12393	-0.23584	-0.092819	-0.344989	0.360399	0.245193	0.360582
YDR429C	TIF35	eIF3g subunit of the core complex of translation initiation factor 3 (eIF3), which is essential for translation; stimulates resumption of ribosomal scanning during translation reinitiation	-3.99e-05	0.0565955	0.0888534	0.059034	-0.0007643	0.0567465	0.0886855	0.143301	0.0761463
YDR430C	CYM1	Lysine-specific metalloprotease of the mitochondrial intermembrane space, member of the pitrilysin family; degrades proteins and presequence peptides cleaved from imported proteins; required for normal mitochondrial morphology	-0.0996769	-0.0611378	-0.107778	0.039881	-0.0050615	0.0360366	-0.284693	-0.230859	-0.259577
YDR432W	NPL3	RNA-binding protein that promotes elongation, regulates termination, and carries poly(A) mRNA from nucleus to cytoplasm; required for pre-mRNA splicing; dissociation from mRNAs promoted by Mtr10p; phosphorylated by Sky1p in the cytoplasm	0.0074556	0.134684	0.0493931	0.258363	0.159953	0.308374	0.161902	0.240628	0.226283
YDR434W	GPI17	Transmembrane protein subunit of the glycosylphosphatidylinositol transamidase complex that adds GPIs to newly synthesized proteins; human PIG-Sp homolog	-0.0065429	0.00220936	-0.01576	-0.00790305	-0.159377	-0.101807	0.0779325	0.0292648	0.0685101
YDR435C	PPM1	Carboxyl methyltransferase, methylates the C terminus of the protein phosphatase 2A catalytic subunit (Pph21p or Pph22p), which is important for complex formation with regulatory subunits	0.0398262	0.172236	0.100706	-0.0436671	0.171376	0.143426	0.593183	0.506987	0.672749
YDR436W	PPZ2	Serine/threonine protein phosphatase Z, isoform of Ppz1p; involved in regulation of potassium transport, which affects osmotic stability, cell cycle progression, and halotolerance	0.124054	0.0664343	-0.03272	0.0341311	0.550624	0.3559	0.455727	0.139406	0.659515
YDR439W	LRS4	Nucleolar protein that forms a complex with Csm1p, and then Mam1p at kinetochores during meiosis I to mediate accurate homolog segregation; required for condensin recruitment to the replication fork barrier site and rDNA repeat segregation	-0.0558557	0.0069398	0.0661716	0.0300115	0.0810919	0.0508558	0.164107	0.108742	0.0658662
YDR440W	DOT1	Nucleosomal histone H3-Lys79 methylase; methylation is required for telomeric silencing, meiotic checkpoint control, and DNA damage response	-0.126886	-0.0553337	-0.038639	0.0851468	0.0347984	0.0455868	0.0719505	0.173592	0.218574
YDR441C	APT2	Apparent pseudogene, not transcribed or translated under normal conditions; encodes a protein with similarity to adenine phosphoribosyltransferase, but artificially expressed protein exhibits no enzymatic activity	0.128842	0.041141	0.118988	0.186308	0.252263	0.351277	0.447877	0.25675	0.66498
YDR443C	SSN2	Subunit of the RNA polymerase II mediator complex; associates with core polymerase subunits to form the RNA polymerase II holoenzyme; required for stable association of Srb10p-Srb11p kinase; essential for transcriptional regulation	-0.116541	0.012384	0.002864	0.020913	0.0382228	0.165132	-0.447388	-0.483639	-0.532772
YDR444W	YDR444W	Putative protein of unknown function	-0.0026647	-0.105167	-0.193167	0.207535	-0.038268	-0.00688565	0.209306	0.217332	-0.0961012
YDR448W	ADA2	Transcription coactivator, component of the ADA and SAGA transcriptional adaptor/HAT (histone acetyltransferase) complexes	0.0475919	-0.0506037	0.0611843	0.0155946	0.106278	0.0312849	0.0921695	0.0428079	0.0866047
YDR449C	UTP6	Nucleolar protein, component of the small subunit (SSU) processome containing the U3 snoRNA that is involved in processing of pre-18S rRNA	0.0487143	0.0460064	0.0840079	0.0620643	0.0130376	-0.0171642	0.0359265	0.0620693	0.0276121
YDR452W	PPN1	Vacuolar endopolyphosphatase with a role in phosphate metabolism; functions as a homodimer	0.0497519	0.0520678	0.0235577	-0.0456631	-0.085125	-0.0965432	-0.0531147	-0.0526217	-0.0957522
YDR454C	GUK1	Guanylate kinase, converts GMP to GDP; required for growth and mannose outer chain elongation of cell wall N-linked glycoproteins	-0.195353	-0.110761	-0.303134	-0.464243	-0.508391	-0.394795	-0.215042	-0.506794	-0.19785
YDR456W	NHX1	Na+/H+ and K+/H+ exchanger, required for intracellular sequestration of Na+ and K+; located in the vacuole and late endosome compartments; required for osmotolerance to acute hypertonic shock and for vacuolar fusion	-0.348536	-0.345723	-0.389258	-0.959697	-0.358268	-0.414442	-0.427395	-0.81685	-1.02723
YDR457W	TOM1	E3 ubiquitin ligase of the hect-domain class; has a role in mRNA export from the nucleus and may regulate transcriptional coactivators; involved in degradation of excess histones	0.106194	0.0471625	0.005695	0.177877	0.143326	0.114914	0.0403465	0.0875677	0.0860985
YDR458C	HEH2	Inner nuclear membrane (INM) protein; contains helix-extension-helix (HEH) motif, nuclear localization signal sequence; targeting to the INM requires the Srp1p-Kap95p karyopherins and the Ran cycle	-0.0892449	-0.0100618	-0.005953	-0.17702	-0.132937	-0.151396	-0.146269	-0.0750839	-0.117806
YDR460W	TFB3	Subunit of TFIIH and nucleotide excision repair factor 3 complexes, involved in transcription initiation, required for nucleotide excision repair; ring finger protein similar to mammalian CAK and TFIIH subunit	-0.0391499	0.123962	0.055328	0.0846122	0.093568	0.0532512	0.120167	0.223228	0.193015
YDR461C-A	YDR461C-A	Putative protein of unknown function	-0.265714	0.10005	-0.2632	-0.356923	-0.448018	-0.368299	0.137002	0.123873	0.0729426
YDR462W	MRPL28	Mitochondrial ribosomal protein of the large subunit	-0.0505135	0.0194098	-0.169513	0.0133583	0.0637838	-0.118196	-0.328152	-0.220535	-0.32478
YDR465C	RMT2	Arginine N5 methyltransferase; methylates ribosomal protein Rpl12 (L12) on Arg67	0.130325	0.113382	0.245801	-0.168644	-0.025122	-0.0770059	0.24317	0.127079	0.245078
YDR466W	PKH3	Protein kinase with similarity to mammalian phosphoinositide-dependent kinase 1 (PDK1) and yeast Pkh1p and Pkh2p, two redundant upstream activators of Pkc1p; identified as a multicopy suppressor of a pkh1 pkh2 double mutant	0.354551	0.249496	-0.081755	0.252334	0.335506	0.150264	0.135799	-0.240496	-0.475149
YDR468C	TLG1	Essential t-SNARE that forms a complex with Tlg2p and Vti1p and mediates fusion of endosome-derived vesicles with the late Golgi; binds the docking complex VFT (Vps fifty-three) through interaction with Vps51p	0.0072167	0.0332936	-0.029029	-0.00418065	-0.083517	-0.0716714	0.16962	0.109686	0.101317
YDR469W	SDC1	Subunit of the COMPASS (Set1C) complex, which methylates lysine 4 of histone H3 and is required in chromatin silencing at telomeres; contains a Dpy-30 domain that mediates interaction with Bre2p; similar to C. elegans and human DPY-30	-0.320056	-0.0168301	0.063418	0.0614729	0.0379293	-0.00835385	0.0660235	0.144507	0.0819024
YDR470C	UGO1	Protein of unknown function; outer membrane component of the mitochondrial fusion machinery; Ugo1p bind directly to Fzo1p and Mgm1p and thereby link these two GTPases during mitochondrial fusion	0.01934	-0.0694464	0.0287256	-0.00364235	0.0705824	0.012199	-0.130462	-0.246441	-0.270338
YDR472W	TRS31	One of 10 subunits of the transport protein particle (TRAPP) complex of the cis-Golgi which mediates vesicle docking and fusion; involved in endoplasmic reticulum (ER) to Golgi membrane traffic	-0.0384905	-0.0284151	-0.065003	0.011049	-0.020707	-0.205997	0.208187	0.0971057	0.148584
YDR473C	PRP3	Splicing factor, component of the U4/U6-U5 snRNP complex	-0.0376237	-0.0321243	-0.121241	-0.184208	-0.283265	-0.266833	-0.0385007	0.118318	0.00519947
YDR475C	JIP4	Protein of unknown function; previously annotated as two separate ORFs, YDR474C and YDR475C, which were merged as a result of corrections to the systematic reference sequence	0.0710837	0.0105758	-0.093994	-0.110742	-0.168496	-0.172748	-0.213159	-0.285744	-0.427554
YDR476C	YDR476C	Putative protein of unknown function; green fluorescent protein (GFP)-fusion protein localizes to the endoplasmic reticulum; YDR476C is not an essential gene	0.0841582	0.0831254	0.0869802	0.0749601	0.0272561	0.0260815	0.0754115	0.0883627	0.124956
YDR477W	SNF1	AMP-activated serine/threonine protein kinase found in a complex containing Snf4p and members of the Sip1p/Sip2p/Gal83p family; required for transcription of glucose-repressed genes, thermotolerance, sporulation, and peroxisome biogenesis	-0.0501834	-0.176699	-0.23227	0.00092915	0.0227554	0.00692725	-0.0920417	-0.110897	-0.0789983
YDR478W	SNM1	Subunit of RNase MRP, which cleaves pre-rRNA and has a role in cell cycle-regulated degradation of daughter cell-specific mRNAs; binds to the NME1 RNA subunit of RNase MRP	0.0191329	0.154172	0.165459	0.0499851	0.0936651	0.0934047	0.157565	0.248727	0.317243
YDR479C	PEX29	Peroxisomal integral membrane peroxin, involved in the regulation of peroxisomal size, number and distribution; genetic interactions suggest that Pex28p and Pex29p act at steps upstream of those mediated by Pex30p, Pex31p, and Pex32p	-0.208246	-0.25327	-0.320716	0.102537	-0.057261	-0.0358414	-0.414682	-0.44833	-0.476907
YDR480W	DIG2	MAP kinase-responsive inhibitor of the Ste12p transcription factor, involved in the regulation of mating-specific genes and the invasive growth pathway; related regulators Dig1p and Dig2p bind to Ste12p	0.0624892	-0.176659	-0.105861	-0.117438	0.149299	-0.0344838	-0.0540723	0.124335	0.461618
YDR481C	PHO8	Repressible alkaline phosphatase, a glycoprotein localized to the vacuole; regulated by levels of inorganic phosphate and by a system consisting of Pho4p, Pho9p, Pho80p, Pho81p and Pho85p; dephosphorylates phosphotyrosyl peptides	-0.102646	-0.0808499	-0.122105	-0.401966	-0.499099	-0.466209	-0.730467	-0.752388	-0.776901
YDR483W	KRE2	Alpha1,2-mannosyltransferase of the Golgi involved in protein mannosylation	0.0259729	-0.0362569	0.0096873	-0.0245451	0.0407475	-0.0690615	0.0620405	0.0369978	0.0396706
YDR484W	VPS52	Component of the GARP (Golgi-associated retrograde protein) complex, Vps51p-Vps52p-Vps53p-Vps54p, which is required for the recycling of proteins from endosomes to the late Golgi; involved in localization of actin and chitin	-0.138134	-0.206063	-0.050497	0.0547984	-0.125451	-0.066594	-0.177743	-0.232648	-0.312026
YDR486C	VPS60	Cytoplasmic and vacuolar membrane protein involved in late endosome to vacuole transport; required for normal filament maturation during pseudohyphal growth; may function in targeting cargo proteins for degradation; interacts with Vta1p	-0.0301354	0.237635	0.0461189	0.393479	0.217187	0.150509	0.561474	0.630471	0.58174
YDR487C	RIB3	3,4-dihydroxy-2-butanone-4-phosphate synthase (DHBP synthase), required for riboflavin biosynthesis from ribulose-5-phosphate, also has an unrelated function in mitochondrial respiration	-0.179403	-0.149884	-0.19173	-0.426665	-0.491191	-0.455001	-0.17731	-0.351787	-0.15805
YDR489W	SLD5	Subunit of the GINS complex (Sld5p, Psf1p, Psf2p, Psf3p), which is localized to DNA replication origins and implicated in assembly of the DNA replication machinery	-0.0478717	-0.0760644	-0.013478	0.0963091	0.0476517	0.0420324	0.22291	0.189481	0.188982
YDR490C	PKH1	Serine/threonine protein kinase involved in sphingolipid-mediated signaling pathway that controls endocytosis; activates Ypk1p and Ykr2p, components of signaling cascade required for maintenance of cell wall integrity; redundant with Pkh2p	-0.116	0.147944	0.24598	0.353443	0.403061	0.229542	-0.175824	-0.0811802	-0.0987622
YDR493W	AIM8	Mitochondrial matrix protein with a role in maintaining the labile mitochondrial zinc pool; null mutant has a respiratory growth defect and an elevated frequency of mitochondrial genome loss; overexpression causes cell cycle delay or arrest	-0.262414	-0.233605	-0.226648	-0.087476	-0.243858	-0.0172887	-0.25918	-0.09656	-0.214543
YDR494W	RSM28	Mitochondrial ribosomal protein of the small subunit; genetic interactions suggest a possible role in promoting translation initiation	-0.0150624	-0.0534347	0.04535	0.0741165	0.0582355	0.0698189	-0.276821	-0.174319	-0.211834
YDR495C	VPS3	Component of CORVET tethering complex; cytoplasmic protein required for the sorting and processing of soluble vacuolar proteins, acidification of the vacuolar lumen, and assembly of the vacuolar H+-ATPase	0.286213	0.164222	0.178087	0.0270091	0.345485	0.0865758	0.331093	0.02384	0.172595
YDR496C	PUF6	Pumilio-homology domain protein that binds the 3' UTR of ASH1 mRNA and represses its translation, resulting in proper asymmetric localization of ASH1 mRNA; also co-sediments with the 60S ribosomal subunit and is required for its biogenesis	0.0250982	0.0792123	-0.004873	-0.106931	-0.08698	-0.0888893	-0.244054	-0.224494	-0.28252
YDR497C	ITR1	Myo-inositol transporter with strong similarity to the minor myo-inositol transporter Itr2p, member of the sugar transporter superfamily; expression is repressed by inositol and choline via Opi1p and derepressed via Ino2p and Ino4p	-0.156435	-0.245673	-0.242045	0.144496	0.07937	0.271037	1.06533	0.956043	1.12482
YDR498C	SEC20	Membrane glycoprotein v-SNARE involved in retrograde transport from the Golgi to the ER; required for N- and O-glycosylation in the Golgi but not in the ER; interacts with the Dsl1p complex through Tip20p	-0.0032953	-0.015255	0.0158978	0.171087	0.105829	0.168692	0.144129	0.1962	0.200563
YDR499W	LCD1	Essential protein required for the DNA integrity checkpoint pathways; interacts physically with Mec1p; putative homolog of S. pombe Rad26 and human ATRIP	-0.15229	-0.101501	-0.142965	0.28978	0.14556	0.370023	-0.202132	-0.102088	-0.233733
YDR500C	RPL37B	Protein component of the large (60S) ribosomal subunit, has similarity to Rpl37Ap and to rat L37 ribosomal protein	0.137402	0.174544	0.387635	0.70488	0.129781	0.41303	0.618444	0.306312	0.515292
YDR502C	SAM2	S-adenosylmethionine synthetase, catalyzes transfer of the adenosyl group of ATP to the sulfur atom of methionine; one of two differentially regulated isozymes (Sam1p and Sam2p)	0.463263	0.606189	0.584156	-0.496359	-0.384464	-0.434625	-0.560485	-0.738042	-0.660208
YDR503C	LPP1	Lipid phosphate phosphatase, catalyzes Mg(2+)-independent dephosphorylation of phosphatidic acid (PA), lysophosphatidic acid, and diacylglycerol pyrophosphate; involved in control of the cellular levels of phosphatidylinositol and PA	-0.0729899	-0.106453	-0.069086	-0.179593	-0.026747	0.0153758	-0.39418	-0.453843	-0.432949
YDR505C	PSP1	Asn and gln rich protein of unknown function; high-copy suppressor of POL1 (DNA polymerase alpha) and partial suppressor of CDC2 (polymerase delta) and CDC6 (pre-RC loading factor) mutations; overexpression results in growth inhibition	-0.0592609	0.039204	-0.089485	-0.0720761	-0.07244	-0.0477428	0.0329485	0.0552739	-0.0889327
YDR507C	GIN4	Protein kinase involved in bud growth and assembly of the septin ring, proposed to have kinase-dependent and kinase-independent activities; undergoes autophosphorylation; similar to Kcc4p and Hsl1p	-0.0396417	-0.0145344	-0.039429	0.0495034	-0.037178	0.00290165	0.331897	0.387636	0.392431
YDR508C	GNP1	High-affinity glutamine permease, also transports Leu, Ser, Thr, Cys, Met and Asn; expression is fully dependent on Grr1p and modulated by the Ssy1p-Ptr3p-Ssy5p (SPS) sensor of extracellular amino acids	0.229	0.125365	0.0170805	0.191882	0.117735	0.266817	-0.149182	-0.211342	-0.235708
YDR510W	SMT3	Ubiquitin-like protein of the SUMO family, conjugated to lysine residues of target proteins; regulates chromatid cohesion, chromosome segregation, APC-mediated proteolysis, DNA replication and septin ring dynamics; phosphorylated at Ser2	-0.0148461	-0.0156415	-0.040618	0.0933983	0.0353282	0.0943883	0.157178	0.0210605	0.165758
YDR511W	ACN9	Protein of the mitochondrial intermembrane space, required for acetate utilization and gluconeogenesis; has orthologs in higher eukaryotes	-0.291065	-0.224545	-0.143587	-0.274823	-0.303214	-0.310859	-0.203202	-0.112925	-0.136631
YDR512C	EMI1	Non-essential protein required for transcriptional induction of the early meiotic-specific transcription factor IME1, also required for sporulation; contains twin cysteine-x9-cysteine motifs	-0.053363	-0.339107	-0.308696	0.280848	0.213376	-0.029899	-0.224346	-0.129972	-0.21098
YDR513W	GRX2	Cytoplasmic glutaredoxin, thioltransferase, glutathione-dependent disulfide oxidoreductase involved in maintaining redox state of target proteins, also exhibits glutathione peroxidase activity, expression induced in response to stress	-0.230267	-0.130421	-0.212555	0.266224	0.246091	0.409128	-0.593453	-0.714561	-0.688315
YDR514C	YDR514C	Putative protein of unknown function	-0.0001507	-0.00885572	-0.003394	-0.0851771	-0.037898	0.0594018	-0.185756	-0.262156	-0.231001
YDR515W	SLF1	RNA binding protein that associates with polysomes; proposed to be involved in regulating mRNA translation; involved in the copper-dependent mineralization of copper sulfide complexes on cell surface in cells cultured in copper salts	-0.0047864	0.0460897	0.0802647	0.291075	0.243662	0.213217	-0.156345	-0.13846	-0.197473
YDR516C	EMI2	Non-essential protein of unknown function required for transcriptional induction of the early meiotic-specific transcription factor IME1; required for sporulation; expression is regulated by glucose-repression transcription factors Mig1/2p	0.0677529	0.0307353	0.0410349	-0.277748	-0.267829	-0.226123	-0.468502	-0.45891	-0.487125
YDR517W	GRH1	Acetylated, cis-golgi localized protein involved in ER to Golgi transport; homolog of human GRASP65; forms a complex with the coiled-coil protein Bug1p; mutants are compromised for the fusion of ER-derived vesicles with Golgi membranes	0.184775	0.176391	0.236798	-0.125621	-0.18416	-0.240076	-0.0236988	0.0656377	0.026284
YDR518W	EUG1	Protein disulfide isomerase of the endoplasmic reticulum lumen, function overlaps with that of Pdi1p; may interact with nascent polypeptides in the ER	0.230347	0.206396	0.101822	-0.20273	-0.239669	-0.227035	-0.270864	-0.246658	-0.184382
YDR519W	FPR2	Membrane-bound peptidyl-prolyl cis-trans isomerase (PPIase), binds to the drugs FK506 and rapamycin; expression pattern suggests possible involvement in ER protein trafficking	-0.526113	-0.493971	-0.530014	-0.0804831	0.0373238	-0.112618	-0.179304	-0.2538	0.0162594
YDR524C	AGE1	ADP-ribosylation factor (ARF) GTPase activating protein (GAP) effector, involved in the secretory and endocytic pathways; contains C2C2H2 cysteine/histidine motif	0.0993489	0.0108751	-0.04213	0.232051	0.279957	0.121479	0.323033	0.33291	0.283151
YDR527W	RBA50	Protein involved in transcription; interacts with RNA polymerase II subunits Rpb2p, Rpb3, and Rpb11p; has similarity to human RPAP1	-0.0148808	-0.0202413	0.005349	-0.234993	-0.130686	-0.171479	-0.282883	-0.217762	-0.376983
YDR529C	QCR7	Subunit 7 of the ubiquinol cytochrome-c reductase complex, which is a component of the mitochondrial inner membrane electron transport chain; oriented facing the mitochondrial matrix; N-terminus appears to play a role in complex assembly	-0.388486	-0.378049	-0.366363	-0.206002	-0.258614	-0.193859	-0.679419	-0.590747	-0.623761
YDR530C	APA2	Diadenosine 5',5''-P1,P4-tetraphosphate phosphorylase II (AP4A phosphorylase), involved in catabolism of bis(5'-nucleosidyl) tetraphosphates; has similarity to Apa1p	-0.0199245	-0.0531955	-0.088091	-0.272458	-0.384928	-0.364147	0.115516	0.120522	0.134829
YDR531W	CAB1	Pantothenate kinase (ATP:D-pantothenate 4'-phosphotransferase, EC 2.7.1.33); catalyzes the first committed step in the universal biosynthetic pathway for synthesis of coenzyme A (CoA)	-0.105551	-0.17074	-0.098062	-0.271764	-0.163105	-0.211844	0.200227	0.167115	0.197152
YDR533C	HSP31	Possible chaperone and cysteine protease with similarity to E. coli Hsp31; member of the DJ-1/ThiJ/PfpI superfamily, which includes human DJ-1 involved in Parkinson's disease; exists as a dimer and contains a putative metal-binding site	0.147098	0.16333	0.105861	-0.177453	-0.094268	0.0101587	-0.59511	-0.581766	-0.545244
YDR538W	PAD1	Phenylacrylic acid decarboxylase, confers resistance to cinnamic acid, decarboxylates aromatic carboxylic acids to the corresponding vinyl derivatives; also has mRNA binding activity; homolog of E. coli UbiX	0.037014	-0.0639509	0.0227215	-0.219423	-0.082465	-0.322763	0.323646	0.341292	0.360197
YDR539W	YDR539W	Ferulic acid decarboxylase, essential for decarboxylation of phenylacrylic acids; homolog of E. coli UbiD; green fluorescent protein (GFP)-fusion protein localizes to the cytoplasm	-0.0213332	0.00826402	0.0947185	-0.317525	-0.224788	-0.460149	-0.0553186	-0.103548	-0.0832078
YDR541C	YDR541C	Putative dihydrokaempferol 4-reductase	0.229067	-0.0343368	-0.023222	0.0808864	0.0420454	-0.0503058	0.20997	0.20598	0.416907
YEL001C	IRC22	Putative protein of unknown function; green fluorescent protein (GFP)-fusion localizes to the ER; YEL001C is non-essential; null mutant displays increased levels of spontaneous Rad52p foci	0.0199174	0.106353	-0.003205	0.0931041	0.0478579	0.146102	0.873741	0.845798	0.806979
YEL002C	WBP1	Beta subunit of the oligosaccharyl transferase (OST) glycoprotein complex; required for N-linked glycosylation of proteins in the endoplasmic reticulum	0.11708	0.0384033	-0.002804	0.0206994	0.0247412	0.00146815	0.603132	0.568432	0.610197
YEL003W	GIM4	Subunit of the heterohexameric cochaperone prefoldin complex which binds specifically to cytosolic chaperonin and transfers target proteins to it	-0.13273	-0.0531427	-0.087869	-0.0921341	-0.076051	0.00853515	0.34456	0.465923	0.428508
YEL005C	VAB2	Protein with a potential role in vacuolar function, as suggested by its ability to bind Vac8p; likely member of BLOC complex involved in endosomal cargo sorting; Vab2p-GFP-fusion localizes to cytoplasm in punctate patter	-0.159691	-0.135747	0.0793869	-0.161172	-0.138099	-0.272534	0.220142	0.35168	0.264438
YEL007W	YEL007W	Putative protein with sequence similarity to S. pombe gti1+ (gluconate transport inducer 1)	0.0066196	-0.0513673	-0.011328	-0.423632	-0.363535	-0.434729	-0.0350831	0.0190171	-0.021176
YEL011W	GLC3	Glycogen branching enzyme, involved in glycogen accumulation; green fluorescent protein (GFP)-fusion protein localizes to the cytoplasm in a punctate pattern	-0.0172671	-0.0708324	-0.021983	0.0982023	0.186871	0.129739	-0.0835612	-0.228282	-0.0912562
YEL012W	UBC8	Ubiquitin-conjugating enzyme that negatively regulates gluconeogenesis by mediating the glucose-induced ubiquitination of fructose-1,6-bisphosphatase (FBPase); cytoplasmic enzyme that catalyzes the ubiquitination of histones in vitro	0.142501	0.209193	0.118844	0.221304	0.153843	0.180147	0.935949	0.853245	1.01262
YEL013W	VAC8	Phosphorylated and palmitoylated vacuolar membrane protein that interacts with Atg13p, required for the cytoplasm-to-vacuole targeting (Cvt) pathway; interacts with Nvj1p to form nucleus-vacuole junctions	-0.0180293	0.0578405	-0.014875	0.0306063	0.116165	0.117943	0.836817	0.92405	0.822391
YEL015W	EDC3	Non-essential conserved protein of unknown function, plays a role in mRNA decapping by specifically affecting the function of the decapping enzyme Dcp1p; localizes to cytoplasmic mRNA processing bodies	0.0481863	-0.00219411	0.0239182	0.0568087	0.0427437	0.0233042	0.943649	1.02053	1.02349
YEL017W	GTT3	Protein of unknown function with a possible role in glutathione metabolism, as suggested by computational analysis of large-scale protein-protein interaction data; GFP-fusion protein localizes to the nuclear periphery	-0.122444	-0.0514853	0.0531241	0.0250429	-0.085806	-0.0274921	1.06274	1.13418	1.13539
YEL018W	EAF5	Esa1p-associated factor, non-essential subunit of the NuA4 acetyltransferase complex	0.0846106	0.00438269	-0.160457	-0.108347	0.123462	0.0990267	0.534152	0.471903	0.541171
YEL020W-A	TIM9	Essential protein of the mitochondrial intermembrane space, forms a complex with Tim10p (TIM10 complex) that delivers hydrophobic proteins to the TIM22 complex for insertion into the inner membrane	0.0430393	0.106083	0.0458551	-0.0152201	0.040368	0.160889	0.718137	0.8038	0.698491
YEL021W	URA3	Orotidine-5'-phosphate (OMP) decarboxylase, catalyzes the sixth enzymatic step in the de novo biosynthesis of pyrimidines, converting OMP into uridine monophosphate (UMP); converts 5-FOA into 5-fluorouracil, a toxic compound	0.0507863	0.0333581	0.0192316	-0.453017	-0.56121	-0.58231	-0.183604	-0.265588	-0.218088
YEL022W	GEA2	Guanine nucleotide exchange factor for ADP ribosylation factors (ARFs), involved in vesicular transport between the Golgi and ER, Golgi organization, and actin cytoskeleton organization; similar to but not functionally redundant with Gea1p	0.108999	0.0441414	0.0686866	0.0786765	0.187462	0.111999	1.2076	1.2016	1.29446
YEL024W	RIP1	Ubiquinol-cytochrome-c reductase, a Rieske iron-sulfur protein of the mitochondrial cytochrome bc1 complex; transfers electrons from ubiquinol to cytochrome c1 during respiration	-0.294458	-0.194927	-0.212606	-0.095412	-0.147255	-0.174894	-0.193397	-0.216633	-0.185458
YEL026W	SNU13	RNA binding protein, part of U3 snoRNP involved in rRNA processing, part of U4/U6-U5 tri-snRNP involved in mRNA splicing, similar to human 15.5K protein	0.0001828	0.190836	0.0935292	0.101992	0.0861958	0.13141	0.0845795	0.136084	0.20021
YEL027W	CUP5	Proteolipid subunit of the vacuolar H(+)-ATPase V0 sector (subunit c; dicyclohexylcarbodiimide binding subunit); required for vacuolar acidification and important for copper and iron metal ion homeostasis	1.16792	0.753331	1.01432	-0.206573	-0.229502	-0.284257	-0.285805	-0.20838	-0.222079
YEL029C	BUD16	Putative pyridoxal kinase, a key enzyme involved in pyridoxal 5'-phosphate synthesis, the active form of vitamin B6; required for genome integrity; involved in bud-site selection; similarity to yeast BUD17 and human pyridoxal kinase (PDXK)	-0.111612	-0.0804765	-0.158344	0.0288123	0.049782	-0.00728005	0.82062	0.910565	0.859693
YEL031W	SPF1	P-type ATPase, ion transporter of the ER membrane involved in ER function and Ca2+ homeostasis; required for regulating Hmg2p degradation; confers sensitivity to a killer toxin (SMKT) produced by Pichia farinosa KK1	0.186292	0.0306641	-0.01487	0.21434	0.235528	0.240007	1.20653	1.30533	1.32519
YEL032W	MCM3	Protein involved in DNA replication; component of the Mcm2-7 hexameric complex that binds chromatin as a part of the pre-replicative complex	-0.0062497	-0.0318504	0.0537913	0.0584775	0.0835681	-0.015364	0.81159	0.825725	0.887918
YEL034W	HYP2	Translation elongation factor eIF-5A, previously thought to function in translation initiation; similar to and functionally redundant with Anb1p; structural homolog of bacterial EF-P; undergoes an essential hypusination modification	-0.0420678	-0.00747482	-0.009409	0.226352	0.169543	0.165967	0.774602	0.81988	0.849949
YEL036C	ANP1	Subunit of the alpha-1,6 mannosyltransferase complex; type II membrane protein; has a role in retention of glycosyltransferases in the Golgi; involved in osmotic sensitivity and resistance to aminonitrophenyl propanediol	-0.0282363	-0.00976122	-0.021293	-0.117248	-0.166598	-0.0741999	0.591759	0.573852	0.527997
YEL037C	RAD23	Protein with ubiquitin-like N terminus, subunit of Nuclear Excision Repair Factor 2 (NEF2) with Rad4p that recognizes and binds damaged DNA; enhances protein deglycosylation activity of Png1p; homolog of human HR23A and HR23B	0.0296404	0.0423301	0.0858234	0.102745	0.155539	0.218783	1.10115	1.09138	1.13444
YEL038W	UTR4	Protein with sequence similarity to 2,3-diketo-5-methylthiopentyl-1-phosphate enolase-phosphatases, involved in methionine salvage; found in both the cytoplasm and nucleus	0.0041271	-0.113104	-0.149043	0.0133047	0.0112108	-0.0146328	0.904988	0.485776	0.811121
YEL039C	CYC7	Cytochrome c isoform 2, expressed under hypoxic conditions; electron carrier of the mitochondrial intermembrane space that transfers electrons from ubiquinone-cytochrome c oxidoreductase to cytochrome c oxidase during cellular respiration	-0.579298	-0.538464	-0.591084	-0.270383	-0.490131	-0.521212	-0.481039	-0.514695	-0.438216
YEL040W	UTR2	Chitin transglycosylase that functions in the transfer of chitin to beta(1-6) and beta(1-3) glucans in the cell wall; similar to and functionally redundant with Crh1; glycosylphosphatidylinositol (GPI)-anchored protein localized to bud neck	-0.112554	-0.118242	-0.153214	0.242507	0.087492	0.133192	0.924508	1.05104	1.03984
YEL042W	GDA1	Guanosine diphosphatase located in the Golgi, involved in the transport of GDP-mannose into the Golgi lumen by converting GDP to GMP after mannose is transferred its substrate	0.0841716	0.0112441	0.0818008	-0.179281	-0.127532	-0.179624	0.754796	0.759561	0.755474
YEL043W	YEL043W	Predicted cytoskeleton protein involved in intracellular signalling based on quantitative analysis of protein-protein interaction maps; may interact with ribosomes, based on co-purification studies; contains fibronectin type III domain fold	0.105501	0.0778506	0.0345238	0.0159548	0.138241	0.127564	0.615943	0.44728	0.534561
YEL044W	IES6	Protein that associates with the INO80 chromatin remodeling complex under low-salt conditions; human ortholog INO80C is a member of the human INO80 complex; implicated in DNA repair based on genetic interactions with RAD52 epistasis genes	-0.0370735	0.0805434	0.064245	-0.165769	-0.099399	-0.0217714	0.2383	0.233141	0.313916
YEL046C	GLY1	Threonine aldolase, catalyzes the cleavage of L-allo-threonine and L-threonine to glycine; involved in glycine biosynthesis	-0.141624	-0.0456807	-0.0598	-0.356068	-0.411322	-0.404207	0.567532	0.580162	0.652268
YEL047C	YEL047C	Soluble fumarate reductase, required with isoenzyme Osm1p for anaerobic growth; may interact with ribosomes, based on co-purification experiments; authentic, non-tagged protein is detected in purified mitochondria in high-throughput studies	0.113615	0.0769779	0.0121418	-0.490469	-0.399585	-0.383229	1.10977	1.02824	1.13668
YEL050C	RML2	Mitochondrial ribosomal protein of the large subunit, has similarity to E. coli L2 ribosomal protein; fat21 mutant allele causes inability to utilize oleate and may interfere with activity of the Adr1p transcription factor	-0.0154083	-0.0715082	-0.054827	-0.00411435	-0.034639	-0.00092895	-0.0605892	-0.0580125	-0.114812
YEL051W	VMA8	Subunit D of the eight-subunit V1 peripheral membrane domain of the vacuolar H+-ATPase (V-ATPase), an electrogenic proton pump found throughout the endomembrane system; plays a role in the coupling of proton transport and ATP hydrolysis	-0.027835	-0.0224556	-0.015762	-0.0806541	-0.112272	-0.102766	0.279326	0.326169	0.414028
YEL052W	AFG1	Conserved protein that may act as a chaperone in the degradation of misfolded or unassembled cytochrome c oxidase subunits; localized to matrix face of the mitochondrial inner membrane; member of the AAA family but lacks a protease domain	-0.0672849	-0.0786726	-0.118807	-0.430668	-0.457541	-0.459316	0.489614	0.557375	0.523219
YEL053C	MAK10	Non-catalytic subunit of N-terminal acetyltransferase of the NatC type, required for replication of dsRNA virus; expression is glucose-repressible	0.203286	0.104436	0.277806	0.494097	0.41344	0.458287	0.871614	0.854923	0.918792
YEL054C	RPL12A	Protein component of the large (60S) ribosomal subunit, nearly identical to Rpl12Bp; rpl12a rpl12b double mutant exhibits slow growth and slow translation; has similarity to E. coli L11 and rat L12 ribosomal proteins	-0.0760679	0.038086	-0.003728	0.0673046	-0.054608	0.0877465	-0.0167078	0.0375926	0.0094379
YEL055C	POL5	DNA Polymerase phi; has sequence similarity to the human MybBP1A and weak sequence similarity to B-type DNA polymerases, not required for chromosomal DNA replication; required for the synthesis of rRNA	0.0290481	0.024424	-0.063515	0.0412506	0.0017963	-0.0183063	0.913639	0.980125	0.953079
YEL056W	HAT2	Subunit of the Hat1p-Hat2p histone acetyltransferase complex; required for high affinity binding of the complex to free histone H4, thereby enhancing Hat1p activity; similar to human RbAp46 and 48; has a role in telomeric silencing	-0.103183	-0.0627924	-0.084593	-0.128218	-0.125792	-0.0964502	0.963499	1.03549	1.08631
YEL058W	PCM1	Essential N-acetylglucosamine-phosphate mutase; converts GlcNAc-6-P to GlcNAc-1-P, which is a precursor for the biosynthesis of chitin and for the formation of N-glycosylated mannoproteins and glycosylphosphatidylinositol anchors	0.146659	0.169679	0.169858	-0.0251381	0.0436059	-0.0383932	1.10974	1.15973	1.21799
YEL060C	PRB1	Vacuolar proteinase B (yscB), a serine protease of the subtilisin family; involved in protein degradation in the vacuole and required for full protein degradation during sporulation; activity inhibited by Pbi2p	-0.049264	0.0625869	-0.01138	-0.148673	-0.180544	-0.156162	0.74875	0.900373	0.825335
YEL061C	CIN8	Kinesin motor protein involved in mitotic spindle assembly and chromosome segregation	0.0580434	0.10066	0.0881114	0.0985064	0.0493948	-0.100195	1.18533	1.18141	1.17568
YEL062W	NPR2	Component of an evolutionarily conserved Npr2/3 complex that mediates downregulation of TORC1 activity in response to amino acid limitation; homolog of human NPRL2; target of Grr1p (E3 ligase); required for growth on urea and proline	0.0011786	-0.226568	0.004114	0.104343	0.0570377	-0.180308	0.376973	0.342558	0.488853
YEL066W	HPA3	D-Amino acid N-acetyltransferase, catalyzes N-acetylation of D-amino acids through ordered bi-bi mechanism in which acetyl-CoA is first substrate bound and CoA is last product liberated; similar to Hpa2p, acetylates histones weakly in vitro	-0.0615809	0.0755934	0.0729591	-0.236646	-0.262794	-0.265429	1.002	0.95233	1.09845
YEL071W	DLD3	D-lactate dehydrogenase, part of the retrograde regulon which consists of genes whose expression is stimulated by damage to mitochondria and reduced in cells grown with glutamate as the sole nitrogen source, located in the cytoplasm	-0.183915	-0.121478	-0.22201	-0.00110655	-0.0765	-0.0636661	0.864078	0.87806	0.84515
YER001W	MNN1	Alpha-1,3-mannosyltransferase, integral membrane glycoprotein of the Golgi complex, required for addition of alpha1,3-mannose linkages to N-linked and O-linked oligosaccharides, one of five S. cerevisiae proteins of the MNN1 family	-0.125798	-0.15725	-0.163167	-0.488134	-0.467282	-0.483055	0.412038	0.455705	0.47687
YER002W	NOP16	Constituent of 66S pre-ribosomal particles, involved in 60S ribosomal subunit biogenesis	0.030172	0.1074	0.0957003	-0.160252	-0.122308	-0.0509899	0.781834	0.807593	0.850085
YER003C	PMI40	Mannose-6-phosphate isomerase, catalyzes the interconversion of fructose-6-P and mannose-6-P; required for early steps in protein mannosylation	0.0629608	0.124643	0.0236414	-0.259362	-0.258657	-0.189189	0.85502	0.845664	0.883346
YER004W	FMP52	Protein of unknown function, localized to the mitochondrial outer membrane; induced by treatment with 8-methoxypsoralen and UVA irradiation	-0.0068064	-0.0785366	-0.07662	0.183974	0.208586	0.226927	0.751653	0.862428	0.885995
YER005W	YND1	Apyrase with wide substrate specificity, involved in preventing the inhibition of glycosylation by hydrolyzing nucleoside tri- and diphosphates which are inhibitors of glycotransferases; partially redundant with Gda1p	-0.0486786	-0.137471	-0.019556	0.0220582	0.0648857	0.0588635	1.09853	1.05257	1.2028
YER006W	NUG1	GTPase that associates with nuclear 60S pre-ribosomes, required for export of 60S ribosomal subunits from the nucleus	0.09442	0.0988251	0.096313	-0.238924	-0.234176	-0.178255	0.876212	0.921096	0.873526
YER007C-A	TMA20	Protein of unknown function that associates with ribosomes and has a putative RNA binding domain; interacts with Tma22p; null mutant exhibits translation defects; has homology to human oncogene MCT-1	-0.0680529	0.150263	0.000706	-0.038713	-0.155249	0.00192955	0.759027	0.841115	0.83611
YER008C	SEC3	Subunit of the exocyst complex (Sec3p, Sec5p, Sec6p, Sec8p, Sec10p, Sec15p, Exo70p, Exo84p) which mediates targeting of post-Golgi vesicles to sites of active exocytosis; Sec3p specifically is a spatial landmark for secretion	0.0105181	-0.0357738	0.006709	0.0335983	0.0572059	0.0180904	0.816364	0.843392	0.787793
YER009W	NTF2	Nuclear envelope protein, interacts with GDP-bound Gsp1p and with proteins of the nuclear pore to transport Gsp1p into the nucleus where it is an essential player in nucleocytoplasmic transport	-0.287642	0.081797	0.0670327	-0.0828791	0.25916	0.457954	0.954769	1.16228	1.51803
YER010C	YER010C	Protein of unknown function, forms a ring-shaped homotrimer; has similarity to members of the prokaryotic rraA family; possibly involved in a phosphotransfer reaction	-0.0354093	-0.0297059	-0.026955	-0.181434	0.0691488	-0.258092	0.789373	0.749611	0.958146
YER012W	PRE1	Beta 4 subunit of the 20S proteasome; localizes to the nucleus throughout the cell cycle	-0.0363963	0.0720631	-0.063339	0.522466	0.3193	0.455234	0.926499	0.939077	0.924222
YER013W	PRP22	DEAH-box RNA-dependent ATPase/ATP-dependent RNA helicase, associates with lariat intermediates before the second catalytic step of splicing; mediates ATP-dependent mRNA release from the spliceosome and unwinds RNA duplexes	0.0883032	-0.0377162	-0.026107	0.162413	0.321307	0.235192	1.08548	1.2818	1.1276
YER014W	HEM14	Protoporphyrinogen oxidase, a mitochondrial enzyme that catalyzes the seventh step in the heme biosynthetic pathway, converting protoporphyrinogen IX to protoporphyrin IX; inhibited by diphenyl ether-type herbicides	0.0984718	0.0752189	0.0348445	-0.144562	-0.074171	-0.124957	0.693593	0.71569	0.663488
YER016W	BIM1	Microtubule-binding protein that together with Kar9p makes up the cortical microtubule capture site and delays the exit from mitosis when the spindle is oriented abnormally	0.0834045	-0.021537	0.084327	0.0280133	-0.030287	-0.0961272	1.19813	1.22381	1.23019
YER017C	AFG3	Component, with Yta12p, of the mitochondrial inner membrane m-AAA protease that mediates degradation of misfolded or unassembled proteins and is also required for correct assembly of mitochondrial enzyme complexes	-0.0711439	-0.0253639	-0.089906	-0.0205551	-0.020725	0.0391169	0.102906	0.122695	0.0645188
YER018C	SPC25	Component of the evolutionarily conserved kinetochore-associated Ndc80 complex (Ndc80p-Nuf2p-Spc24p-Spc25p); involved in chromosome segregation, spindle checkpoint activity and kinetochore clustering	0.0335704	-0.088781	-0.068074	0.0541201	0.0370149	-0.0245678	0.676088	0.573937	0.757568
YER019C-A	SBH2	Ssh1p-Sss1p-Sbh2p complex component, involved in protein translocation into the endoplasmic reticulum; homologous to Sbh1p	-0.0703919	0.415433	0.366339	0.951164	0.831971	0.610587	0.8015	0.837341	0.299221
YER019W	ISC1	Mitochondrial membrane localized inositol phosphosphingolipid phospholipase C, hydrolyzes complex sphingolipids to produce ceramide; activated by phosphatidylserine, cardiolipin, and phosphatidylglycerol; mediates Na+ and Li+ halotolerance	0.0930488	0.021613	0.0150005	0.265764	0.160111	0.117669	0.888298	0.827066	0.886451
YER020W	GPA2	Nucleotide binding alpha subunit of the heterotrimeric G protein that interacts with the receptor Gpr1p, has signaling role in response to nutrients; green fluorescent protein (GFP)-fusion protein localizes to the cell periphery	-0.111905	-0.182796	-0.103368	-0.289353	-0.229732	-0.251464	0.610947	0.588903	0.613101
YER021W	RPN3	Essential, non-ATPase regulatory subunit of the 26S proteasome lid, similar to the p58 subunit of the human 26S proteasome; temperature-sensitive alleles cause metaphase arrest, suggesting a role for the proteasome in cell cycle control	0.0335674	-0.0127149	-0.066248	0.19482	0.170158	0.185769	0.508989	0.647594	0.515067
YER022W	SRB4	Subunit of the RNA polymerase II mediator complex; associates with core polymerase subunits to form the RNA polymerase II holoenzyme; essential for transcriptional regulation; similar to the human MED17 gene	-0.02911	-0.0673285	0.0205881	-0.0172131	0.026742	-0.111693	0.676597	0.727934	0.771646
YER023W	PRO3	Delta 1-pyrroline-5-carboxylate reductase, catalyzes the last step in proline biosynthesis	0.0212372	0.122301	0.053367	-0.089973	-0.124221	0.00030315	0.714422	0.708922	0.82664
YER024W	YAT2	Carnitine acetyltransferase; has similarity to Yat1p, which is a carnitine acetyltransferase associated with the mitochondrial outer membrane	-0.476158	-0.584822	-0.510785	-1.26335	-1.29085	-1.01004	0.442373	0.449957	0.404995
YER025W	GCD11	Gamma subunit of the translation initiation factor eIF2, involved in the identification of the start codon; binds GTP when forming the ternary complex with GTP and tRNAi-Met	-0.0202352	0.00882731	-0.048698	-0.0149261	-0.081088	-0.00783125	0.718476	0.759199	0.718871
YER026C	CHO1	Phosphatidylserine synthase, functions in phospholipid biosynthesis; catalyzes the reaction CDP-diaclyglycerol + L-serine = CMP + L-1-phosphatidylserine, transcriptionally repressed by myo-inositol and choline	-0.0701209	0.0582893	0.124082	-0.143858	-0.265397	-0.344499	1.55682	1.72638	1.67135
YER027C	GAL83	One of three possible beta-subunits of the Snf1 kinase complex, allows nuclear localization of the Snf1 kinase complex in the presence of a nonfermentable carbon source; contains glycogen-binding domain	-0.0478675	-0.00814382	-0.016169	0.0504459	-0.080717	-0.0253242	0.563819	0.519737	0.469445
YER029C	SMB1	Core Sm protein Sm B; part of heteroheptameric complex (with Smd1p, Smd2p, Smd3p, Sme1p, Smx3p, and Smx2p) that is part of the spliceosomal U1, U2, U4, and U5 snRNPs; homolog of human Sm B and Sm B'	0.0126785	-0.091951	0.00855	-0.100093	0.0013782	-0.116997	0.750233	0.873757	0.854692
YER030W	CHZ1	Histone chaperone for Htz1p/H2A-H2B dimer; required for the stabilization of the Chz1p-Htz1-H2B complex; has overlapping function with Nap1p; null mutant displays weak sensitivity to MMS and benomyl; contains a highly conserved CHZ motif	0.0071121	0.0444699	-0.041182	-0.13972	-0.100113	0.118756	0.973679	0.846249	1.11672
YER031C	YPT31	Rab family GTPase, very similar to Ypt32p; involved in the exocytic pathway; mediates intra-Golgi traffic or the budding of post-Golgi vesicles from the trans-Golgi	-0.0097015	0.0121338	0.0325865	0.222515	0.221871	0.171384	0.929549	0.987845	1.05486
YER032W	FIR1	Protein involved in 3' mRNA processing, interacts with Ref2p; potential Cdc28p substrate	-0.0884599	0.0766929	-0.111527	0.103728	0.0763947	0.0998644	0.981998	1.09262	1.18752
YER034W	YER034W	Putative protein of unknown function; non-essential gene; expression induced upon calcium shortage	0.117403	0.215856	0.223556	0.0732492	0.118007	0.221411	1.84158	1.9429	1.77632
YER036C	ARB1	ATPase of the ATP-binding cassette (ABC) family involved in 40S and 60S ribosome biogenesis, has similarity to Gcn20p; shuttles from nucleus to cytoplasm, physically interacts with Tif6p, Lsg1p	0.0085147	0.0756277	-0.003808	0.0469386	0.0028914	0.0366687	0.638261	0.686282	0.653833
YER037W	PHM8	Protein of unknown function, expression is induced by low phosphate levels and by inactivation of Pho85p	0.0114472	-0.0684972	-0.063669	0.47364	0.419536	0.48961	0.504236	0.567187	0.554812
YER040W	GLN3	Transcriptional activator of genes regulated by nitrogen catabolite repression (NCR), localization and activity regulated by quality of nitrogen source	0.0478024	0.0544805	0.002637	-0.241828	-0.222838	-0.194133	0.593209	0.59714	0.572084
YER042W	MXR1	Methionine-S-sulfoxide reductase, involved in the response to oxidative stress; protects iron-sulfur clusters from oxidative inactivation along with MXR2; involved in the regulation of lifespan	0.107131	-0.116	-0.109749	0.00224225	-0.204936	-0.233146	1.19567	0.743435	1.09716
YER043C	SAH1	S-adenosyl-L-homocysteine hydrolase, catabolizes S-adenosyl-L-homocysteine which is formed after donation of the activated methyl group of S-adenosyl-L-methionine (AdoMet) to an acceptor	0.182365	0.210848	0.132774	-0.0381671	-0.086128	-0.0542841	0.411444	0.38962	0.40905
YER044C	ERG28	Endoplasmic reticulum membrane protein, may facilitate protein-protein interactions between the Erg26p dehydrogenase and the Erg27p 3-ketoreductase and/or tether these enzymes to the ER, also interacts with Erg6p	-0.102226	-0.206353	-0.38528	-0.382054	-0.438167	-0.285192	0.653309	0.481909	0.500411
YER046W	SPO73	Meiosis-specific protein of unknown function, required for spore wall formation during sporulation; dispensible for both nuclear divisions during meiosis	-0.292666	-0.138285	-0.215878	-0.254129	-0.220519	-0.32969	0.283547	0.238586	0.276756
YER047C	SAP1	Putative ATPase of the AAA family, interacts with the Sin1p transcriptional repressor in the two-hybrid system	0.0400083	-0.271561	-0.007906	-0.221178	-0.17938	-0.129263	1.04039	0.920675	1.00706
YER048C	CAJ1	Nuclear type II J heat shock protein of the E. coli dnaJ family, contains a leucine zipper-like motif, binds to non-native substrates for presentation to Ssa3p, may function during protein translocation, assembly and disassembly	0.0169495	-0.00226219	-0.052514	-0.135447	-0.149182	-0.139714	0.931758	0.931794	0.891367
YER048W-A	ISD11	Protein required for mitochondrial iron-sulfur cluster biosynthesis	0.0677914	0.0313844	0.129073	0.0886491	0.0908245	0.0879341	0.617812	0.462242	0.579637
YER049W	TPA1	Poly(rA)-binding protein involved in translation termination efficiency, mRNA poly(A) tail length and mRNA stability; interacts with Sup45p (eRF1), Sup35p (eRF3) and Pab1p; similar to prolyl 4-hydroxylases; binds Fe(III) and 2-oxoglutarate	0.0243124	0.067845	0.0357894	-0.0244471	-0.03673	-0.0459113	0.69412	0.680112	0.734167
YER050C	RSM18	Mitochondrial ribosomal protein of the small subunit, has similarity to E. coli S18 ribosomal protein	0.0569393	-0.0588433	0.0568028	0.143921	0.155315	0.175897	0.282717	0.209582	0.323109
YER052C	HOM3	Aspartate kinase (L-aspartate 4-P-transferase); cytoplasmic enzyme that catalyzes the first step in the common pathway for methionine and threonine biosynthesis; expression regulated by Gcn4p and the general control of amino acid synthesis	-0.36019	-0.27009	-0.334923	-0.541998	-0.566877	-0.529952	0.345391	0.520282	0.409744
YER053C	PIC2	Mitochondrial phosphate carrier, imports inorganic phosphate into mitochondria; functionally redundant with Mir1p but less abundant than Mir1p under normal conditions; expression is induced at high temperature	0.202529	0.00259627	0.071078	0.377588	0.420603	-0.181832	-0.167161	-0.0548672	-0.100714
YER055C	HIS1	ATP phosphoribosyltransferase, a hexameric enzyme, catalyzes the first step in histidine biosynthesis; mutations cause histidine auxotrophy and sensitivity to Cu, Co, and Ni salts; transcription is regulated by general amino acid control	-0.185404	-0.100787	-0.05929	-0.361451	-0.342481	-0.414934	0.753646	0.736939	0.799358
YER056C	FCY2	Purine-cytosine permease, mediates purine (adenine, guanine, and hypoxanthine) and cytosine accumulation	-0.0665099	0.0388191	0.129485	0.0922357	0.0442094	0.216988	1.01494	1.15313	1.15938
YER057C	HMF1	Member of the p14.5 protein family with similarity to Mmf1p, functionally complements Mmf1p function when targeted to mitochondria; heat shock inducible; high-dosage growth inhibitor; forms a homotrimer in vitro	0.127132	0.163577	0.060324	-0.228919	-0.03595	0.00641185	0.824705	0.472019	1.01338
YER058W	PET117	Protein required for assembly of cytochrome c oxidase	-0.0007198	-0.0502931	-0.225046	0.488549	0.304793	0.479029	0.340614	0.451862	0.432355
YER059W	PCL6	Pho85p cyclin of the Pho80p subfamily; forms the major Glc8p kinase together with Pcl7p and Pho85p; involved in the control of glycogen storage by Pho85p; stabilized by Elongin C binding	0.0107859	-0.148682	-0.063691	-0.057445	-0.23613	-0.266183	0.602202	0.556802	0.626343
YER060W	FCY21	Putative purine-cytosine permease, very similar to Fcy2p but cannot substitute for its function	0.234076	0.165689	0.289209	0.443779	0.26254	0.49057	0.562867	0.465597	0.702534
YER061C	CEM1	Mitochondrial beta-keto-acyl synthase with possible role in fatty acid synthesis; required for mitochondrial respiration	-0.137173	-0.0665048	-0.075935	-0.620858	-0.565995	-0.649151	0.723959	0.758422	0.710733
YER062C	HOR2	One of two redundant DL-glycerol-3-phosphatases (RHR2/GPP1 encodes the other) involved in glycerol biosynthesis; induced in response to hyperosmotic stress and oxidative stress, and during the diauxic transition	-0.0903759	-0.0189319	-0.233881	-0.405524	-0.483546	-0.309791	-0.456839	-0.881587	-0.466519
YER063W	THO1	Conserved nuclear RNA-binding protein; specifically binds to transcribed chromatin in a THO- and RNA-dependent manner, genetically interacts with shuttling hnRNP NAB2; overproduction suppresses transcriptional defect caused by hpr1 mutation	-0.0523348	-0.0272741	-0.179709	-0.254569	-0.101211	-0.0725379	0.546324	0.460624	0.552832
YER064C	YER064C	Non-essential nuclear protein; null mutation has global effects on transcription	0.066333	0.186462	0.153295	0.0771877	0.0541176	0.0798107	0.749219	0.852252	0.945094
YER067W	YER067W	Protein of unknown function involved in energy metabolism under respiratory conditions; protein abundance is increased upon intracellular iron depletion	-0.18081	-0.347202	-0.002514	0.44878	0.374752	0.566406	0.319088	0.483047	0.614268
YER068W	MOT2	Subunit of the CCR4-NOT complex, which has roles in transcription regulation, mRNA degradation, and post-transcriptional modifications; with Ubc4p, ubiquitinates nascent polypeptide-associated complex subunits and histone demethyase Jhd2p	-0.0046556	-0.0483104	0.0616378	-0.0972331	-0.037302	-0.105708	0.0361695	0.0772287	0.0620221
YER069W	ARG5	Protein that is processed in the mitochondrion to yield acetylglutamate kinase and N-acetyl-gamma-glutamyl-phosphate reductase, which catalyze the 2nd and 3rd steps in arginine biosynthesis; enzymes form a complex with Arg2p	0.0019074	0.0207554	0.0178559	-0.506612	-0.526148	-0.566393	-0.521307	-0.550059	-0.574004
YER070W	RNR1	Major isoform of the large subunit of ribonucleotide-diphosphate reductase; the RNR complex catalyzes rate-limiting step in dNTP synthesis, regulated by DNA replication and DNA damage checkpoint pathways via localization of small subunits	0.0795783	0.0816321	0.106	-0.0351551	-0.024595	-0.0266684	0.862096	0.858325	0.900751
YER071C	YER071C	Protein of unknown function; green fluorescent protein (GFP)-fusion protein localizes to the cytoplasm in a punctate pattern	0.0442384	-0.00137387	0.0803295	-0.0749001	-0.110446	-0.139626	1.15074	0.89278	1.16239
YER072W	VTC1	Subunit of the vacuolar transporter chaperone (VTC) complex involved in membrane trafficking, vacuolar polyphosphate accumulation, microautophagy and non-autophagic vacuolar fusion; also has mRNA binding activity	0.466881	0.4029	0.458132	0.266364	0.344618	0.16157	1.19204	0.909503	1.17145
YER073W	ALD5	Mitochondrial aldehyde dehydrogenase, involved in regulation or biosynthesis of electron transport chain components and acetate formation; activated by K+; utilizes NADP+ as the preferred coenzyme; constitutively expressed	-0.343238	-0.28139	-0.309075	-1.02483	-0.988484	-1.02141	0.232333	0.238554	0.195977
YER074W-A	YOS1	Integral membrane protein required for ER to Golgi transport; localized to the Golgi, the ER, and COPII vesicles; interacts with Yip1p and Yif1p	0.0279186	0.0374531	-0.027189	0.0173691	0.131862	0.116981	0.725372	0.854614	0.853776
YER075C	PTP3	Phosphotyrosine-specific protein phosphatase involved in the inactivation of mitogen-activated protein kinase (MAPK) during osmolarity sensing; dephosporylates Hog1p MAPK and regulates its localization; localized to the cytoplasm	-0.166182	-0.167808	-0.286382	-0.377619	-0.429046	-0.261504	0.400622	0.671901	0.518195
YER077C	YER077C	Putative protein of unknown function; green fluorescent protein (GFP)-fusion protein localizes to the mitochondrion; null mutation results in a decrease in plasma membrane electron transport	0.197908	0.120396	-0.001536	0.211278	0.147028	0.134491	0.50007	0.544023	0.618486
YER078C	YER078C	Mitochondrial aminopeptidase; cleaves the N termini of at least 38 imported proteins after cleavage by the mitochondrial processing peptidase (MPP), thereby increasing their stability; member of the aminopeptidase P family	-0.0397151	-0.0371713	-0.030418	-0.111088	-0.095465	-0.160363	0.759196	0.879736	0.810177
YER079W	YER079W	Putative protein of unknown function	-0.264307	-0.305742	-0.185222	-0.613454	-0.557873	-0.410048	0.856225	0.778131	0.926845
YER080W	AIM9	Putative protein of unknown function; the authentic, non-tagged protein is detected in highly purified mitochondria in high-throughput studies; null mutant displays elevated frequency of mitochondrial genome loss	0.0944886	0.0586954	0.0457906	0.0486643	0.0384966	0.0991501	0.80204	0.852577	0.800211
YER081W	SER3	3-phosphoglycerate dehydrogenase, catalyzes the first step in serine and glycine biosynthesis; isozyme of Ser33p	0.0495395	-0.0166474	-0.167464	-0.333911	-0.322628	-0.407624	-0.258204	-0.297862	-0.299963
YER082C	UTP7	Nucleolar protein, component of the small subunit (SSU) processome containing the U3 snoRNA that is involved in processing of pre-18S rRNA	-6.11e-05	0.0512716	-0.005855	-0.187851	-0.145581	-0.0991613	0.794374	0.896894	0.880487
YER083C	GET2	Subunit of the GET complex; involved in insertion of proteins into the ER membrane; required for the retrieval of HDEL proteins from the Golgi to the ER in an ERD2 dependent fashion and for meiotic nuclear division	0.0683667	0.144745	0.296999	0.164446	0.42895	0.16567	1.49531	1.41197	1.35681
YER086W	ILV1	Threonine deaminase, catalyzes the first step in isoleucine biosynthesis; expression is under general amino acid control; ILV1 locus exhibits highly positioned nucleosomes whose organization is independent of known ILV1 regulation	-0.177543	-0.145082	-0.1766	-0.379359	-0.368475	-0.366821	0.496283	0.491646	0.488521
YER087C-B	SBH1	Beta subunit of the Sec61p ER translocation complex (Sec61p-Sss1p-Sbh1p); involved in protein translocation into the endoplasmic reticulum; interacts with the exocyst complex and also with Rtn1p; homologous to Sbh2p	0.153251	0.19315	0.36032	0.0819932	0.3552	0.293294	1.02703	1.2644	1.2779
YER087W	AIM10	Protein with similarity to tRNA synthetases; non-tagged protein is detected in purified mitochondria; null mutant is viable and displays elevated frequency of mitochondrial genome loss	0.0762581	0.032093	0.0519	0.0941494	0.0936516	0.077776	0.836701	0.762102	0.788158
YER088C	DOT6	Protein involved in rRNA and ribosome biogenesis; binds polymerase A and C motif; subunit of the RPD3L histone deacetylase complex; similar to Tod6p; has chromatin specific SANT domain; involved in telomeric gene silencing and filamentation	-0.105563	-0.160232	-0.175484	-0.754532	-0.658739	-0.743926	0.52908	0.444887	0.62478
YER089C	PTC2	Type 2C protein phosphatase (PP2C); dephosphorylates Hog1p to limit maximal osmostress induced kinase activity; dephosphorylates Ire1p to downregulate the unfolded protein response; dephosphorylates Cdc28p; inactivates the DNA checkpoint	-0.131532	-0.0575925	-0.055736	-0.161918	-0.198886	-0.189295	0.941728	1.02873	0.969794
YER090W	TRP2	Anthranilate synthase, catalyzes the initial step of tryptophan biosynthesis, forms multifunctional hetero-oligomeric anthranilate synthase:indole-3-glycerol phosphate synthase enzyme complex with Trp3p	-0.187187	-0.157071	-0.202613	-0.50517	-0.512957	-0.440506	0.514792	0.553879	0.508992
YER091C	MET6	Cobalamin-independent methionine synthase, involved in methionine biosynthesis and regeneration; requires a minimum of two glutamates on the methyltetrahydrofolate substrate, similar to bacterial metE homologs	0.0457717	0.127151	0.0520807	-0.965917	-0.967964	-0.933236	-1.13765	-1.1944	-1.20111
YER092W	IES5	Protein that associates with the INO80 chromatin remodeling complex under low-salt conditions	0.117279	0.114808	0.0898893	0.101303	0.320765	0.261529	0.403645	0.463963	0.631273
YER093C	TSC11	Subunit of TORC2 (Tor2p-Lst8p-Avo1-Avo2-Tsc11p-Bit61p), a membrane-associated complex that regulates actin cytoskeletal dynamics during polarized growth and cell wall integrity; involved in sphingolipid metabolism; contains a RasGEFN domain	0.0790765	-0.00622652	0.004855	0.106824	0.0248691	-0.0862072	0.539973	0.513369	0.551643
YER093C-A	YER093C-A	Protein of unknown function; null mutant is viable but shows increased loss of mitochondrial genome and synthetic interaction with prohibitin (phb1); contains an intron	-0.03071	-0.199409	0.0460946	0.0423228	-0.093516	-0.0238323	0.839826	0.714593	0.804724
YER094C	PUP3	Beta 3 subunit of the 20S proteasome involved in ubiquitin-dependent catabolism; human homolog is subunit C10	0.0826405	-0.0355175	-0.006848	0.358797	0.360118	0.347265	0.938499	0.777215	0.878608
YER095W	RAD51	Strand exchange protein, forms a helical filament with DNA that searches for homology; involved in the recombinational repair of double-strand breaks in DNA during vegetative growth and meiosis; homolog of Dmc1p and bacterial RecA protein	0.0129391	-0.0567219	-0.035204	0.0807932	0.14647	0.0474105	0.770935	0.777623	0.871581
YER099C	PRS2	5-phospho-ribosyl-1(alpha)-pyrophosphate synthetase, synthesizes PRPP, which is required for nucleotide, histidine, and tryptophan biosynthesis; one of five related enzymes, which are active as heteromultimeric complexes	-0.0150995	-0.0462872	0.0114496	-0.220104	-0.128881	-0.216668	1.06306	1.05141	1.06933
YER100W	UBC6	Ubiquitin-conjugating enzyme involved in ER-associated protein degradation; located at the cytosolic side of the ER membrane; tail region contains a transmembrane segment at the C-terminus; substrate of the ubiquitin-proteasome pathway	0.0541975	-0.0669354	-0.179704	-0.16407	0.0004007	-0.132218	0.870445	0.865205	0.973609
YER101C	AST2	Protein that may have a role in targeting of plasma membrane [H+]ATPase (Pma1p) to the plasma membrane, as suggested by analysis of genetic interactions	-0.133283	-0.0721741	-0.093221	-0.389375	-0.324757	-0.288594	0.176944	0.144517	0.244509
YER102W	RPS8B	Protein component of the small (40S) ribosomal subunit; identical to Rps8Ap and has similarity to rat S8 ribosomal protein	0.112716	0.108484	0.0697576	0.150088	0.114234	0.115122	0.0030185	0.0048554	0.00404618
YER103W	SSA4	Heat shock protein that is highly induced upon stress; plays a role in SRP-dependent cotranslational protein-membrane targeting and translocation; member of the HSP70 family; cytoplasmic protein that concentrates in nuclei upon starvation	1.75979	1.92013	1.87138	0.936349	1.12461	0.87398	0.181842	0.15115	0.29452
YER105C	NUP157	Abundant subunit of the nuclear pore complex (NPC), present on both sides of the NPC; has similarity to Nup170p; essential role, with Nup170p, in NPC assembly	0.10287	-0.00720082	-0.015748	0.107886	0.0530432	0.0535832	1.1479	1.24627	1.2343
YER107C	GLE2	Component of the Nup82 subcomplex of the nuclear pore complex; required for polyadenylated RNA export but not for protein import; homologous to S. pombe Rae1p	0.0902513	-0.0770016	0.0779392	-0.229181	-0.121169	-0.189793	0.706099	0.663912	0.655121
YER110C	KAP123	Karyopherin beta, mediates nuclear import of ribosomal proteins prior to assembly into ribosomes and import of histones H3 and H4; localizes to the nuclear pore, nucleus, and cytoplasm; exhibits genetic interactions with RAI1	0.0336745	0.111678	0.0359105	0.00958775	-0.047875	0.00999845	0.608098	0.701281	0.681194
YER111C	SWI4	DNA binding component of the SBF complex (Swi4p-Swi6p), a transcriptional activator that in concert with MBF (Mbp1-Swi6p) regulates late G1-specific transcription of targets including cyclins and genes required for DNA synthesis and repair	0.112494	-0.0293552	-0.076928	0.0914735	-0.164995	0.00425015	0.645655	0.642355	0.590447
YER112W	LSM4	Lsm (Like Sm) protein; part of heteroheptameric complexes (Lsm2p-7p and either Lsm1p or 8p): cytoplasmic Lsm1p complex involved in mRNA decay; nuclear Lsm8p complex part of U6 snRNP and possibly involved in processing tRNA, snoRNA, and rRNA	-0.0106097	0.0107642	-0.035066	0.0691388	0.0247206	0.0506779	0.542646	0.613321	0.441689
YER113C	TMN3	Protein with a role in cellular adhesion and filamentous growth; similar to Emp70p and Tmn2p; member of Transmembrane Nine family with 9 transmembrane segments; localizes to Golgi; induced by 8-methoxypsoralen plus UVA irradiation	-0.0541002	-0.0924169	-0.209189	0.0938169	-0.128972	-0.167481	0.842836	0.975075	0.962419
YER114C	BOI2	Protein implicated in polar growth, functionally redundant with Boi1p; interacts with bud-emergence protein Bem1p; contains an SH3 (src homology 3) domain and a PH (pleckstrin homology) domain	-0.0038685	0.0549117	-0.012235	-0.118642	-0.054804	-0.0664414	0.870237	0.867953	0.873306
YER117W	RPL23B	Protein component of the large (60S) ribosomal subunit, identical to Rpl23Ap and has similarity to E. coli L14 and rat L23 ribosomal proteins	0.0239598	0.0532789	0.0268291	0.00109935	0.0202067	0.00414135	-0.0883294	-0.102984	-0.079396
YER118C	SHO1	Transmembrane osmosensor, participates in activation of both the Cdc42p- and MAP kinase-dependent filamentous growth pathway and the high-osmolarity glycerol response pathway	0.0270731	0.0595515	0.0550267	0.197288	-0.0132146	0.0562436	1.14824	1.18848	1.21345
YER119C	AVT6	Vacuolar aspartate and glutamate exporter; member of a family of seven genes (AVT1-7) related to vesicular GABA-glycine transporters; involved in compartmentalizing acidic amino acids in response to nitrogen starvation	0.17784	-0.156992	-0.070408	-0.00207235	0.23308	-0.0873713	1.10296	0.859909	1.04192
YER120W	SCS2	Integral ER membrane protein that regulates phospholipid metabolism via an interaction with the FFAT motif of Opi1p, also involved in telomeric silencing, disruption causes inositol auxotrophy above 34 degrees C, VAP homolog	-0.159644	0.0572456	-0.004654	-0.0669501	-0.055399	0.00077215	1.13308	1.17963	1.12532
YER122C	GLO3	ADP-ribosylation factor GTPase activating protein (ARF GAP), involved in ER-Golgi transport; shares functional similarity with Gcs1p	0.0621058	-0.027481	0.0248599	-0.25263	-0.186085	-0.152756	0.577962	0.685199	0.621612
YER123W	YCK3	Palmitoylated, vacuolar membrane-localized casein kinase I isoform; negatively regulates vacuole fusion during hypertonic stress via phosphorylation of Vps41p; shares essential functions with Hrr25p; regulates vesicle fusion in AP-3 pathway	-0.0382654	-0.101694	-0.142159	-0.166592	-0.082696	-0.103171	0.85534	0.896252	0.902899
YER125W	RSP5	E3 ubiquitin ligase of the NEDD4 family; involved in regulating many cellular processes, including MVB sorting, heat shock response, transcription, and endocytosis; human homolog is involved in Liddle syndrome; mutant tolerates aneuploidy	-0.0420525	0.015681	0.0116629	-0.0431461	-0.074284	-0.0711655	0.915919	0.963802	0.968188
YER126C	NSA2	Protein constituent of 66S pre-ribosomal particles, contributes to processing of the 27S pre-rRNA	0.0704016	0.178134	0.115095	-0.253368	-0.222382	-0.136796	0.726225	0.542161	0.493365
YER127W	LCP5	Essential protein involved in maturation of 18S rRNA; depletion leads to inhibited pre-rRNA processing and reduced polysome levels; localizes primarily to the nucleolus	0.081596	0.117362	0.267576	0.0705149	0.120968	0.0290433	0.206617	0.305374	0.223009
YER128W	YER128W	Putative protein of unknown function	0.0486181	0.0663363	0.21031	-0.0515561	-0.027901	-0.186216	0.4484	0.484709	0.381585
YER129W	SAK1	Upstream serine/threonine kinase for the SNF1 complex; partially redundant with Elm1p and Tos3p; members of this family have functional orthology with LKB1, a mammalian kinase associated with Peutz-Jeghers cancer-susceptibility syndrome	0.148465	0.0960312	0.144144	0.0728888	0.0714164	-0.0421352	1.05601	1.10559	1.12225
YER131W	RPS26B	Protein component of the small (40S) ribosomal subunit; nearly identical to Rps26Ap and has similarity to rat S26 ribosomal protein	-0.0516991	0.0416247	0.00802	0.187905	0.0731315	0.167995	-0.0042935	0.0373829	-0.0029772
YER132C	PMD1	Protein with an N-terminal kelch-like domain, putative negative regulator of early meiotic gene expression; required, with Mds3p, for growth under alkaline conditions	0.112768	0.114738	0.176459	0.0349942	0.0732224	0.0242221	0.755158	0.690367	0.858854
YER133W	GLC7	Type 1 serine/threonine protein phosphatase catalytic subunit, involved in many processes (eg: glycogen metabolism, sporulation, mitosis); accumulates at mating projections by interaction with Afr1p; interacts with many regulatory subunits	0.0922915	0.113563	0.12413	0.0989317	0.0433946	0.0349456	0.840974	0.750181	0.834755
YER134C	YER134C	Putative protein of unknown function; non-essential gene	-0.0247862	0.026495	0.0416444	0.135504	0.0739139	0.0688501	1.36441	1.37633	1.41355
YER136W	GDI1	GDP dissociation inhibitor, regulates vesicle traffic in secretory pathways by regulating the dissociation of GDP from the Sec4/Ypt/rab family of GTP binding proteins	-0.0657459	0.00802767	0.0177264	0.019327	-0.141704	-0.0610911	0.879479	0.846873	0.85317
YER137C	YER137C	Putative protein of unknown function	-0.165794	-0.13522	-0.146802	-0.450749	-0.395334	-0.302279	1.01479	1.07573	1.01703
YER139C	RTR1	CTD phosphatase; dephosphorylates S5-P in the C-terminal domain of Rpo21p; has a cysteine-rich motif required for function and conserved in eukaryotes; shuttles between the nucleus and cytoplasm	-0.11573	0.177675	-0.089668	-0.0844721	0.256455	0.28989	1.02601	0.819089	0.907946
YER141W	COX15	Protein required for the hydroxylation of heme O to form heme A, which is an essential prosthetic group for cytochrome c oxidase	0.0439313	-0.198132	-0.228914	-0.179083	-0.145327	-0.0729839	0.669139	0.588433	0.544015
YER142C	MAG1	3-methyl-adenine DNA glycosylase involved in protecting DNA against alkylating agents; initiates base excision repair by removing damaged bases to create abasic sites that are subsequently repaired	0.340375	0.210376	0.308797	0.566025	0.599984	0.543918	0.514308	0.496436	0.468202
YER143W	DDI1	DNA damage-inducible v-SNARE binding protein, contains a ubiquitin-associated (UBA) domain, may act as a negative regulator of constitutive exocytosis, may play a role in S-phase checkpoint control	-0.005629	-0.0150165	-0.035099	-0.0402971	-0.0099155	-0.0255002	0.766831	0.791976	0.851144
YER144C	UBP5	Putative ubiquitin-specific protease, closest paralog of Doa4p but has no functional overlap; concentrates at the bud neck	-0.0421114	-0.198914	-0.350339	-0.174931	-0.113596	0.097521	1.02809	1.04455	0.939026
YER145C	FTR1	High affinity iron permease involved in the transport of iron across the plasma membrane; forms complex with Fet3p; expression is regulated by iron	0.506113	0.295615	0.227356	-0.222718	-0.250011	-0.200136	0.48243	0.527815	0.434967
YER146W	LSM5	Lsm (Like Sm) protein; part of heteroheptameric complexes (Lsm2p-7p and either Lsm1p or 8p): cytoplasmic Lsm1p complex involved in mRNA decay; nuclear Lsm8p complex part of U6 snRNP and possibly involved in processing tRNA, snoRNA, and rRNA	-0.101355	0.1001	0.0281608	-0.0223101	0.148751	0.134169	0.474001	0.58468	0.626195
YER147C	SCC4	Subunit of cohesin loading factor (Scc2p-Scc4p), a complex required for the loading of cohesin complexes onto chromosomes; involved in establishing sister chromatid cohesion during double-strand break repair via phosphorylated histone H2AX	0.134498	0.0980971	0.0628916	0.125173	0.201644	-0.0259455	0.59395	0.617973	0.657884
YER148W	SPT15	TATA-binding protein, general transcription factor that interacts with other factors to form the preinitiation complex at promoters, essential for viability	0.0147341	-0.0400548	-0.006233	-0.00540505	0.042983	-0.0393758	0.698688	0.748991	0.768286
YER149C	PEA2	Coiled-coil polarisome protein required for polarized morphogenesis, cell fusion, and low affinity Ca2+ influx; forms polarisome complex with Bni1p, Bud6p, and Spa2p; localizes to sites of polarized growth	-0.0015252	0.0234426	-0.025994	0.00665925	0.0001727	0.0534203	0.60865	0.585198	0.654629
YER151C	UBP3	Ubiquitin-specific protease that interacts with Bre5p to co-regulate anterograde and retrograde transport between the ER and Golgi; inhibitor of gene silencing; cleaves ubiquitin fusions but not polyubiquitin; also has mRNA binding activity	0.0151697	0.0621677	-0.029473	-0.00187135	0.0064785	0.104968	0.213524	0.351828	0.267084
YER152C	YER152C	Protein with 2-aminoadipate transaminase activity; shares amino acid similarity with the aminotransferases Aro8p and Aro9p; YER152C is not an essential gene	0.0297741	-0.0667481	0.0728685	-0.0907591	0.0140535	-0.0526561	1.30582	1.39554	1.38469
YER154W	OXA1	Mitochondrial inner membrane insertase, mediates the insertion of both mitochondrial- and nuclear-encoded proteins from the matrix into the inner membrane, interacts with mitochondrial ribosomes; conserved from bacteria to animals	-0.141145	-0.16951	-0.119111	-0.0649301	0.0544549	-4.785e-05	0.477576	0.588056	0.530807
YER155C	BEM2	Rho GTPase activating protein (RhoGAP) involved in the control of cytoskeleton organization and cellular morphogenesis; required for bud emergence	0.107824	0.0348451	-0.030406	-0.0270461	0.0576902	0.0179612	1.06356	1.2297	1.16848
YER156C	YER156C	Putative protein of unknown function; interacts with Hsp82p and copurifies with Ipl1p; expression is copper responsive and downregulated in strains deleted for MAC1, a copper-responsive transcription factor; similarity to mammalian MYG1	-0.0297056	-0.00469101	0.0212452	0.00324215	-0.0118299	0.0532828	1.05719	1.02317	1.09709
YER157W	COG3	Essential component of the conserved oligomeric Golgi complex (Cog1p through Cog8p), a cytosolic tethering complex that functions in protein trafficking to mediate fusion of transport vesicles to Golgi compartments	0.03658	-0.114484	-0.112312	-0.147018	0.0498904	-0.0602133	0.451039	0.56132	0.511952
YER159C	BUR6	Subunit of a heterodimeric NC2 transcription regulator complex with Ncb2p; complex binds to TBP and can repress transcription by preventing preinitiation complex assembly or stimulate activated transcription; homologous to human NC2alpha	-0.0491749	0.0581693	-0.053293	-0.0394931	-0.142091	-0.0424938	0.572605	0.623576	0.663523
YER161C	SPT2	Protein involved in negative regulation of transcription; required for RNA polyadenylation; exhibits regulated interactions with both histones and SWI-SNF components, has similarity to mammalian HMG1 proteins	0.0801182	0.0373729	-0.072084	-0.0774641	-0.144247	-0.0354526	1.00199	1.03316	1.05994
YER163C	YER163C	Putative protein of unknown function; green fluorescent protein (GFP)-fusion protein localizes to the cytoplasm and nucleus; periodically expressed during the metabolic cycle; weak similarity to bacterial cation transport protein	0.0828947	0.0817524	0.0561086	0.178983	0.146226	0.144803	0.837854	0.601233	0.845674
YER164W	CHD1	Nucleosome remodeling factor that functions in regulation of transcription elongation; contains a chromo domain, a helicase domain and a DNA-binding domain; component of both the SAGA and SLIK complexes	0.103574	-0.0173133	-0.02526	0.108734	0.265123	0.07674	0.640757	0.819766	0.708878
YER165W	PAB1	Poly(A) binding protein, part of the 3'-end RNA-processing complex, mediates interactions between the 5' cap structure and the 3' mRNA poly(A) tail, involved in control of poly(A) tail length, interacts with translation factor eIF-4G	-0.0492416	0.0162243	-0.024225	-0.0169811	0.0072493	0.0915499	0.195818	0.217301	0.176986
YER166W	DNF1	Aminophospholipid translocase (flippase) that localizes primarily to the plasma membrane; contributes to endocytosis, protein transport and cell polarity; type 4 P-type ATPase	0.189126	0.033961	-0.062904	-0.0761001	0.0005666	0.0283029	0.783699	0.828323	0.884416
YER168C	CCA1	ATP (CTP):tRNA-specific tRNA nucleotidyltransferase; different forms targeted to the nucleus, cytosol, and mitochondrion are generated via the use of multiple transcriptional and translational start sites	-0.0168399	0.0169433	0.00312	-0.053478	0.0176558	-0.0399178	0.891809	0.982245	0.934326
YER169W	RPH1	JmjC domain-containing histone demethylase which can specifically demethylate H3K36 tri- and dimethyl modification states; transcriptional repressor of PHR1; Rph1p phosphorylation during DNA damage is under control of the MEC1-RAD53 pathway	0.126168	0.110064	0.125492	0.126708	0.13298	0.118244	0.721681	0.930364	0.791423
YER171W	RAD3	5' to 3' DNA helicase, involved in nucleotide excision repair and transcription; subunit of RNA polII initiation factor TFIIH and of Nucleotide Excision Repair Factor 3 (NEF3); homolog of human XPD protein; mutant has aneuploidy tolerance	0.0610689	-0.0253635	-4.5e-05	0.0875938	0.100245	0.0256018	0.573688	0.721117	0.615079
YER172C	BRR2	RNA-dependent ATPase RNA helicase (DEIH box); required for disruption of U4/U6 base-pairing in native snRNPs to activate the spliceosome for catalysis; homologous to human U5-200kD	0.136965	0.0951222	-0.032975	-0.0887701	0.0427213	-0.0422477	0.815851	0.855535	0.912377
YER174C	GRX4	Hydroperoxide and superoxide-radical responsive glutathione-dependent oxidoreductase; monothiol glutaredoxin subfamily member along with Grx3p and Grx5p; protects cells from oxidative damage; mutant has increased aneuploidy tolerance	0.210627	0.16875	0.244058	0.38628	0.401433	0.249815	1.07621	0.934381	0.94435
YER175C	TMT1	Trans-aconitate methyltransferase, cytosolic enzyme that catalyzes the methyl esterification of 3-isopropylmalate, an intermediate of the leucine biosynthetic pathway, and trans-aconitate, which inhibits the citric acid cycle	-0.375628	-0.351634	-0.356583	-1.99516	-2.02951	-1.96867	0.203837	0.0788977	0.295516
YER176W	ECM32	DNA dependent ATPase/DNA helicase belonging to the Dna2p- and Nam7p-like family of helicases that is involved in modulating translation termination; interacts with the translation termination factors, localized to polysomes	0.202832	0.275522	0.203068	0.352504	0.607248	0.515362	1.55236	1.65634	1.65382
YER177W	BMH1	14-3-3 protein, major isoform; controls proteome at post-transcriptional level, binds proteins and DNA, involved in regulation of many processes including exocytosis, vesicle transport, Ras/MAPK signaling, and rapamycin-sensitive signaling	-0.116021	-0.0683328	-0.132799	-0.0198721	-0.030398	-0.00180705	0.51124	0.538901	0.603036
YER178W	PDA1	E1 alpha subunit of the pyruvate dehydrogenase (PDH) complex, catalyzes the direct oxidative decarboxylation of pyruvate to acetyl-CoA; phosphorylated; regulated by glucose	-0.0389423	-0.0532684	-0.057825	-0.178391	-0.25238	-0.215683	0.126765	0.125797	0.118488
YER182W	FMP10	Putative protein of unknown function; the authentic, non-tagged protein is detected in highly purified mitochondria in high-throughput studies	-0.171031	-0.163618	-0.123879	-0.0117291	-0.046715	-0.0771816	0.618735	0.678518	0.638508
YER183C	FAU1	5,10-methenyltetrahydrofolate synthetase, involved in folic acid biosynthesis	0.079878	0.127376	0.0730938	0.116335	0.19343	0.300556	1.34588	1.28449	1.39604
YFL001W	DEG1	tRNA:pseudouridine synthase, introduces pseudouridines at position 38 or 39 in tRNA, important for maintenance of translation efficiency and normal cell growth, localizes to both the nucleus and cytoplasm; non-essential for viability	0.034617	-0.0679471	0.0783667	-0.10859	-0.067196	-0.075356	-0.132116	-0.11512	-0.205088
YFL002C	SPB4	Putative ATP-dependent RNA helicase, nucleolar protein required for synthesis of 60S ribosomal subunits at a late step in the pathway; sediments with 66S pre-ribosomes in sucrose gradients	0.0583968	-0.0282904	-0.033765	-0.29206	-0.226919	-0.272826	-0.181718	-0.249165	-0.254335
YFL004W	VTC2	Subunit of the vacuolar transporter chaperone (VTC) complex involved in membrane trafficking, vacuolar polyphosphate accumulation, microautophagy and non-autophagic vacuolar fusion	0.0716199	0.0174272	-0.031757	-0.0887141	-0.10398	-0.0880893	-0.122429	-0.209799	-0.152958
YFL005W	SEC4	Rab family GTPase essential for vesicle-mediated exocytic secretion and autophagy; associates with the exocyst component Sec15p and may regulate polarized delivery of transport vesicles to the exocyst at the plasma membrane	-0.0581076	0.0167564	-0.043676	0.120947	0.0508243	0.0857316	0.0758275	0.162467	0.0793996
YFL007W	BLM10	Proteasome activator subunit; found in association with core particles, with and without the 19S regulatory particle; required for resistance to bleomycin, may be involved in protecting against oxidative damage; similar to mammalian PA200	0.213867	0.168788	0.17907	0.332904	0.426426	0.381036	-0.176194	-0.318556	-0.306537
YFL008W	SMC1	Subunit of the multiprotein cohesin complex, essential protein involved in chromosome segregation and in double-strand DNA break repair; SMC chromosomal ATPase family member, binds DNA with a preference for DNA with secondary structure	0.125703	0.0326659	0.002876	0.152841	0.0905698	0.043764	0.0255495	0.0849177	0.0440784
YFL009W	CDC4	F-box protein required for G1/S and G2/M transition, associates with Skp1p and Cdc53p to form a complex, SCFCdc4, which acts as ubiquitin-protein ligase directing ubiquitination of the phosphorylated CDK inhibitor Sic1p	-0.12091	-0.243972	-0.229048	-0.0903751	0.0822888	-0.105331	0.255757	0.162146	0.27948
YFL010C	WWM1	WW domain containing protein of unknown function; binds to Mca1p, a caspase-related protease that regulates H2O2-induced apoptosis; overexpression causes G1 phase growth arrest and clonal death that is suppressed by overexpression of MCA1	0.0218801	0.0846575	0.0707403	-0.107656	-0.161006	-0.144471	-0.385032	-0.49673	-0.406584
YFL013C	IES1	Subunit of the INO80 chromatin remodeling complex	-0.0104228	0.015495	-0.021685	-0.0996201	-0.063327	-0.0480463	-0.143438	-0.091899	-0.0642332
YFL014W	HSP12	Plasma membrane localized protein that protects membranes from desiccation; induced by heat shock, oxidative stress, osmostress, stationary phase entry, glucose depletion, oleate and alcohol; regulated by the HOG and Ras-Pka pathways	-0.629182	-0.515102	-0.837709	0.910324	0.661045	0.931948	-2.98662	-2.86736	-3.35398
YFL016C	MDJ1	Co-chaperone that stimulates the ATPase activity of the HSP70 protein Ssc1p; involved in protein folding/refolding in the mitochodrial matrix; required for proteolysis of misfolded proteins; member of the HSP40 (DnaJ) family of chaperones	-0.102842	-0.0745884	-0.140688	-0.0259661	-0.085108	-0.0262571	-0.059061	-0.0631282	-0.110879
YFL017C	GNA1	Evolutionarily conserved glucosamine-6-phosphate acetyltransferase required for multiple cell cycle events including passage through START, DNA synthesis, and mitosis; involved in UDP-N-acetylglucosamine synthesis, forms GlcNAc6P from AcCoA	-0.0918899	-0.0772366	-0.165501	-0.305931	-0.376333	-0.382661	-0.222747	-0.347618	-0.195488
YFL017W-A	SMX2	Core Sm protein Sm G; part of heteroheptameric complex (with Smb1p, Smd1p, Smd2p, Smd3p, Sme1p, and Smx3p) that is part of the spliceosomal U1, U2, U4, and U5 snRNPs; homolog of human Sm G	-0.182821	-0.222725	-0.269171	-0.266289	-0.195822	-0.151717	-0.188941	-0.149204	-0.132701
YFL018C	LPD1	Dihydrolipoamide dehydrogenase, the lipoamide dehydrogenase component (E3) of the pyruvate dehydrogenase and 2-oxoglutarate dehydrogenase multi-enzyme complexes	-0.108364	-0.0784438	-0.128757	-0.236378	-0.246661	-0.20147	-0.308565	-0.308918	-0.407191
YFL021W	GAT1	Transcriptional activator of genes involved in nitrogen catabolite repression; contains a GATA-1-type zinc finger DNA-binding motif; activity and localization regulated by nitrogen limitation and Ure2p	-0.432058	-0.448951	-0.373727	-0.428843	-0.422121	-0.406542	0.246936	0.273297	0.360677
YFL022C	FRS2	Alpha subunit of cytoplasmic phenylalanyl-tRNA synthetase, forms a tetramer with Frs1p to form active enzyme; evolutionarily distant from mitochondrial phenylalanyl-tRNA synthetase based on protein sequence, but substrate binding is similar	-0.0905509	0.0354559	-0.057378	-0.128453	-0.176294	-0.0430571	-0.0447226	-0.0610145	-0.0868291
YFL023W	BUD27	Unconventional prefoldin protein involved in translation initiation; mutants have inappropriate expression of nutrient sensitive genes due to translational derepression of Gcn4p transcription factor; diploid mutants show random budding	0.117477	0.0765962	0.141332	0.0613826	0.0415772	-0.0233165	0.0548335	0.0523207	-0.0278451
YFL024C	EPL1	Component of NuA4, which is an essential histone H4/H2A acetyltransferase complex; homologous to Drosophila Enhancer of Polycomb	-0.0297274	0.0220998	0.0275622	-0.437015	-0.143152	-0.0540861	0.0371325	-0.0231586	0.0914588
YFL026W	STE2	Receptor for alpha-factor pheromone; seven transmembrane-domain GPCR that interacts with both pheromone and a heterotrimeric G protein to initiate the signaling response that leads to mating between haploid a and alpha cells	0.119476	-0.0865219	-0.020779	-0.0779641	-0.15327	-0.274866	0.354712	0.477682	0.345441
YFL027C	GYP8	GTPase-activating protein for yeast Rab family members; Ypt1p is the preferred in vitro substrate but also acts on Sec4p, Ypt31p and Ypt32p; involved in the regulation of ER to Golgi vesicle transport	0.0351501	0.0385993	0.229576	0.222311	0.312169	0.149348	-0.0054245	-0.0148317	0.177486
YFL028C	CAF16	Part of evolutionarily-conserved CCR4-NOT regulatory complex; contains single ABC-type ATPase domain but no transmembrane domain; interacts with several subunits of Mediator	-0.159457	-0.13702	-0.212755	-0.161036	-0.187766	-0.18006	-0.281165	-0.328328	-0.334047
YFL034C-A	RPL22B	Protein component of the large (60S) ribosomal subunit, has similarity to Rpl22Ap and to rat L22 ribosomal protein	-0.0203705	-0.0218972	0.0500436	-0.00208575	-0.057814	-0.314689	0.23924	0.0438518	0.0884393
YFL034C-B	MOB2	Component of the RAM signaling network, that activates the Cbk1p kinase, thereby facilitating the Ace2p-dependent daughter cell-specific transcription of genes involved in cell separation; similar to Mob1p	-0.0070311	-0.227135	-0.184419	-0.172137	-0.043452	-0.0438275	-0.0485006	0.130967	0.0396217
YFL034W	YFL034W	Putative integral membrane protein that interacts with Rpp0p, which is a component of the ribosomal stalk	-0.0151661	-0.0332631	0.133056	-0.333979	-0.0126516	0.0153518	-0.105348	-0.0939371	-0.0776303
YFL036W	RPO41	Mitochondrial RNA polymerase; single subunit enzyme similar to those of T3 and T7 bacteriophages; requires a specificity subunit encoded by MTF1 for promoter recognition	-0.229979	-0.236003	-0.353039	0.217328	0.21644	0.112817	-0.326221	-0.286473	-0.238291
YFL037W	TUB2	Beta-tubulin; associates with alpha-tubulin (Tub1p and Tub3p) to form tubulin dimer, which polymerizes to form microtubules	-0.0059437	0.0264101	0.0892053	0.286766	0.28701	0.27112	0.225086	0.204912	0.244687
YFL038C	YPT1	Rab family GTPase, involved in the ER-to-Golgi step of the secretory pathway; complex formation with the Rab escort protein Mrs6p is required for prenylation of Ypt1p by protein geranylgeranyltransferase type II (Bet2p-Bet4p)	0.0041992	0.0474725	0.0326929	0.23578	0.220005	0.136753	0.173041	0.192622	0.246334
YFL039C	ACT1	Actin, structural protein involved in cell polarization, endocytosis, and other cytoskeletal functions	0.0279492	0.032856	0.027444	0.112723	0.0822937	0.0879095	0.0594045	0.0680127	0.0951204
YFL041W	FET5	Multicopper oxidase, integral membrane protein with similarity to Fet3p; may have a role in iron transport	0.0017174	0.0810157	0.0782548	-0.166842	-0.214341	-0.115298	-0.279674	-0.246698	-0.271908
YFL044C	OTU1	Deubiquitylation enzyme that binds to the chaperone-ATPase Cdc48p; may contribute to regulation of protein degradation by deubiquitylating substrates that have been ubiquitylated by Ufd2p; member of the Ovarian Tumor (OTU) family	0.05103	0.00906734	0.121371	0.516999	0.481334	0.520183	-0.137696	-0.145337	-0.0878996
YFL045C	SEC53	Phosphomannomutase, involved in synthesis of GDP-mannose and dolichol-phosphate-mannose; required for folding and glycosylation of secretory proteins in the ER lumen	-0.0168203	-0.0691294	-0.173623	-0.32205	-0.324816	-0.259215	0.0162785	-0.303165	0.0375808
YFL046W	FMP32	Putative protein of unknown function; the authentic, non-tagged protein is detected in highly purified mitochondria in high-throughput studies	0.273348	0.00199554	0.0537316	0.137849	0.120503	0.0148269	-0.0076325	-0.129211	-0.101959
YFL047W	RGD2	GTPase-activating protein (RhoGAP) for Cdc42p and Rho5p	-0.0149153	-0.0612616	-0.013616	-0.0545751	-0.0088513	-0.0855663	0.0484505	0.0689517	0.058514
YFL048C	EMP47	Integral membrane component of endoplasmic reticulum-derived COPII-coated vesicles, which function in ER to Golgi transport	-0.0088209	0.0205284	-0.027731	-0.105512	-0.092036	-0.0881383	0.146982	0.0933617	0.0967819
YFL049W	SWP82	Member of the SWI/SNF chromatin remodeling complex in which it plays an as yet unidentified role; has identifiable counterparts in closely related yeast species; abundantly expressed in many growth conditions; paralog of Npl6p	-0.0960549	-0.0490159	-0.172067	-0.0641861	-0.105781	-0.142332	0.0255405	-0.140185	-0.0426968
YFR001W	LOC1	Nuclear protein involved in asymmetric localization of ASH1 mRNA; binds double-stranded RNA in vitro; constituent of 66S pre-ribosomal particles	-0.0467647	-0.00425611	-0.032906	-0.164546	-0.275109	-0.107434	-0.0546482	0.0032802	-0.0224734
YFR002W	NIC96	Component of the nuclear pore complex, required for nuclear pore formation; forms a subcomplex with Nsp1p, Nup57p, and Nup49p	-0.0356863	-0.0127559	-0.065767	-0.0253191	-0.107322	-0.0458453	-0.130883	-0.103135	-0.148073
YFR003C	YPI1	Inhibitor of the type I protein phosphatase Glc7p, which is involved in regulation of a variety of metabolic processes; overproduction causes decreased cellular content of glycogen	0.0499558	0.235352	0.157488	0.123916	0.309377	0.264331	0.0047385	0.0837627	0.0200567
YFR004W	RPN11	Metalloprotease subunit of the 19S regulatory particle of the 26S proteasome lid; couples the deubiquitination and degradation of proteasome substrates; involved, independent of catalytic activity, in fission of mitochondria and peroxisomes	-0.0065618	0.105031	0.0278288	0.260837	0.143876	0.294001	0.202474	0.134294	0.15251
YFR005C	SAD1	Conserved zinc-finger domain protein involved in pre-mRNA splicing, required for assembly of U4 snRNA into the U4/U6 particle	-0.122472	0.0181675	0.0124323	0.385415	0.318048	0.191933	0.554419	0.482755	0.379961
YFR006W	YFR006W	Putative X-Pro aminopeptidase; green fluorescent protein (GFP)-fusion protein localizes to the cytoplasm; YFR006W is not an essential gene	-0.0898099	-0.0345265	-0.02346	0.413746	0.427598	0.472132	0.544925	0.583646	0.555509
YFR007W	YFH7	Putative kinase with similarity to the phosphoribulokinase/uridine kinase/bacterial pantothenate kinase (PRK/URK/PANK) subfamily of P-loop kinases	0.0338721	0.11081	0.178858	0.0948059	0.244835	0.127293	0.253514	0.0399912	0.305119
YFR008W	FAR7	Protein involved in recovery from cell cycle arrest in response to pheromone, in a Far1p-independent pathway; interacts with Far3p, Far8p, Far9p, Far10p, and Far11p	-0.231367	-0.0377102	0.0336276	0.064062	0.0122021	0.105052	0.0142705	0.057675	0.0813178
YFR009W	GCN20	Positive regulator of the Gcn2p kinase activity, forms a complex with Gcn1p; proposed to stimulate Gcn2p activation by an uncharged tRNA	-0.0446098	0.00437237	-0.026649	-0.125925	-0.08293	-0.119913	-0.207381	-0.232225	-0.228213
YFR010W	UBP6	Ubiquitin-specific protease situated in the base subcomplex of the 26S proteasome, releases free ubiquitin from branched polyubiquitin chains; works in opposition to Hul5p polyubiquitin elongation activity; mutant has aneuploidy tolerance	0.0099722	0.00117039	-0.012956	0.132203	0.110026	0.156855	-0.138257	-0.137886	-0.162959
YFR011C	AIM13	Putative protein of unknown function; the authentic, non-tagged protein is detected in highly purified mitochondria; null mutant displays reduced respiratory growth and reduced frequency of mitochondrial genome loss	-0.108914	0.0513076	-0.079932	-0.163371	-0.10471	-0.0629281	-0.0305988	-0.0365767	-0.0756344
YFR013W	IOC3	Member of a complex (Isw1a) with Isw1p that has nucleosome-stimulated ATPase activity and represses transcription initiation by specific positioning of a promoter proximal dinucleosome; has homology to Esc8p, which is involved in silencing	-0.0007162	0.0307602	0.0555419	0.0646294	0.148914	0.0362766	0.0050305	0.109672	0.117981
YFR014C	CMK1	Calmodulin-dependent protein kinase; may play a role in stress response, many CA++/calmodulan dependent phosphorylation substrates demonstrated in vitro, amino acid sequence similar to Cmk2p and mammalian Cam Kinase II	0.0128303	-0.0422102	-0.144787	-0.332158	-0.194792	-0.329826	-0.38381	-0.372072	-0.326545
YFR015C	GSY1	Glycogen synthase with similarity to Gsy2p, the more highly expressed yeast homolog; expression induced by glucose limitation, nitrogen starvation, environmental stress, and entry into stationary phase	0.271505	0.103227	0.15709	-0.782478	-0.754109	-0.841931	-1.87324	-1.78524	-1.82064
YFR016C	YFR016C	Putative protein of unknown function; green fluorescent protein (GFP)-fusion protein localizes to the cytoplasm and bud; interacts with Spa2p; YFL016C is not an essential gene	0.0268814	0.0150226	0.0341668	-0.126836	-0.05021	-0.0182197	-0.276478	-0.232955	-0.247885
YFR018C	YFR018C	Putative protein of unknown function	-0.126176	-0.207287	-0.272219	-0.17598	0.0403122	0.0923941	0.31306	0.428746	0.524929
YFR021W	ATG18	Phosphoinositide binding protein required for vesicle formation in autophagy and the cytoplasm-to-vacuole targeting (Cvt) pathway; binds both phosphatidylinositol (3,5)-bisphosphate and phosphatidylinositol 3-phosphate; WD-40 repeat protein	0.2072	-0.0553133	0.209696	0.388525	0.314633	-0.0529364	-0.0833735	-0.20641	-0.116797
YFR024C-A	LSB3	Protein containing a C-terminal SH3 domain; binds Las17p, which is a homolog of human Wiskott-Aldrich Syndrome protein involved in actin patch assembly and actin polymerization	0.0497129	0.108861	0.1132	0.110774	0.129517	0.109933	-0.141449	-0.220442	-0.184279
YFR025C	HIS2	Histidinolphosphatase, catalyzes the eighth step in histidine biosynthesis; mutations cause histidine auxotrophy and sensitivity to Cu, Co, and Ni salts; transcription is regulated by general amino acid control	-0.183179	-0.0711035	-0.196797	-0.433814	-0.151789	-0.120277	0.440126	0.0816357	0.607563
YFR028C	CDC14	Protein phosphatase required for mitotic exit; located in the nucleolus until liberated by the FEAR and Mitotic Exit Network in anaphase, enabling it to act on key substrates to effect a decrease in CDK/B-cyclin activity and mitotic exit	0.0602245	0.081206	0.006465	-0.0521751	0.181876	0.0376478	0.0865555	0.231613	0.18441
YFR030W	MET10	Subunit alpha of assimilatory sulfite reductase, which converts sulfite into sulfide	-0.444829	-0.428425	-0.418224	-1.67403	-1.64183	-1.69237	-1.36269	-1.33179	-1.38601
YFR031C	SMC2	Subunit of the condensin complex; essential SMC chromosomal ATPase family member that forms a complex with Smc4p to form the active ATPase; Smc2p/Smc4p complex binds DNA; required for clustering of tRNA genes at the nucleolus	0.0880281	0.0461791	0.0889741	0.0636124	0.113308	0.123096	0.0437645	0.0700907	0.0735781
YFR033C	QCR6	Subunit 6 of the ubiquinol cytochrome-c reductase complex, which is a component of the mitochondrial inner membrane electron transport chain; highly acidic protein; required for maturation of cytochrome c1	-0.173556	-0.311839	-0.210706	-0.362636	-0.225151	-0.357469	-0.661049	-0.976463	-0.605549
YFR034C	PHO4	Basic helix-loop-helix (bHLH) transcription factor of the myc-family; binds cooperatively with Pho2p to the PHO5 promoter; function is regulated by phosphorylation at multiple sites and by phosphate availability	-0.0735459	-0.138333	-0.081276	-0.11752	-0.089736	-0.0421359	-0.595681	-0.546626	-0.483433
YFR037C	RSC8	Component of the RSC chromatin remodeling complex; essential for viability and mitotic growth; homolog of SWI/SNF subunit Swi3p, but unlike Swi3p, does not activate transcription of reporters	-0.0602019	-0.0825982	-0.070684	0.0503528	0.0516604	0.0964067	0.0464315	0.0838477	0.0605633
YFR038W	IRC5	Putative ATPase containing the DEAD/H helicase-related sequence motif; null mutant displays increased levels of spontaneous Rad52p foci	0.0195967	-0.0132745	-0.129914	0.297385	-0.013716	0.151631	0.0220345	0.109794	0.0955979
YFR039C	YFR039C	Putative protein of unknown function; may be involved in response to high salt and changes in carbon source; deletion mutant has decreased spore survival in Drosophila feces	-0.0326112	0.00331916	-0.112065	0.0908207	-0.083897	0.045443	0.170176	0.224604	0.360113
YFR040W	SAP155	Protein that forms a complex with the Sit4p protein phosphatase and is required for its function; member of a family of similar proteins including Sap4p, Sap185p, and Sap190p	-0.0062984	0.0752775	0.0394501	-0.0483931	-0.156756	-0.156725	-0.0407533	-0.0585732	-0.04691
YFR041C	ERJ5	Type I membrane protein with a J domain is required to preserve the folding capacity of the endoplasmic reticulum; loss of the non-essential ERJ5 gene leads to a constitutively induced unfolded protein response	0.0384241	-0.0268825	0.0484621	-0.333164	-0.307337	-0.363049	-0.0033275	0.000891	-0.0990332
YFR043C	IRC6	Putative protein of unknown function; null mutant displays increased levels of spontaneous Rad52p foci	-0.124637	0.0955215	-0.046632	-0.126455	-0.015129	-0.117993	0.282779	0.185146	0.170457
YFR044C	DUG1	Cys-Gly metallo-di-peptidase; forms a complex with Dug2p and Dug3p to degrade glutathione (GSH) and other peptides containing a gamma-glu-X bond in an alternative pathway to GSH degradation by gamma-glutamyl transpeptidase (Ecm38p)	-0.0125771	-0.0216256	-0.02929	0.0763878	0.0922187	0.120289	0.166885	0.145955	0.140881
YFR045W	YFR045W	Putative mitochondrial transport protein; null mutant is viable, exhibits decreased levels of chitin and normal resistance to calcofluor white	-0.0114008	-0.125416	-0.175745	0.0930372	-0.031162	0.103641	-0.248193	-0.301386	-0.434395
YFR047C	BNA6	Quinolinate phosphoribosyl transferase, required for the de novo biosynthesis of NAD from tryptophan via kynurenine; expression regulated by Hst1p	-0.0303872	0.023176	-0.003236	-0.394487	-0.454078	-0.421013	-0.325665	-0.384185	-0.293182
YFR048W	RMD8	Cytosolic protein required for sporulation	0.11346	-0.0449619	-0.00728	0.0715316	0.0766618	0.0666386	-0.0455368	-0.162084	-0.255723
YFR049W	YMR31	Mitochondrial ribosomal protein of the small subunit, has similarity to human mitochondrial ribosomal protein MRP-S36	-0.231844	-0.171281	-0.054182	-0.0723711	-0.105031	-0.110464	-0.0948969	-0.287063	-0.275745
YFR050C	PRE4	Beta 7 subunit of the 20S proteasome	0.12016	0.117413	0.0573894	0.161156	0.419175	0.400566	0.354081	0.171759	0.270742
YFR051C	RET2	Delta subunit of the coatomer complex (COPI), which coats Golgi-derived transport vesicles; involved in retrograde transport between Golgi and ER	0.018551	0.129617	0.152131	0.127457	0.138892	0.0587502	0.130919	0.16801	0.237949
YFR052W	RPN12	Subunit of the 19S regulatory particle of the 26S proteasome lid; synthetically lethal with RPT1, which is an ATPase component of the 19S regulatory particle; physically interacts with Nob1p and Rpn3p	0.0002253	0.0833785	-0.032496	0.224361	0.147308	0.287882	0.18995	0.141337	0.189866
YFR053C	HXK1	Hexokinase isoenzyme 1, a cytosolic protein that catalyzes phosphorylation of glucose during glucose metabolism; expression is highest during growth on non-glucose carbon sources; glucose-induced repression involves the hexokinase Hxk2p	-0.137553	-0.155951	-0.168354	-0.360112	-0.416139	-0.431823	-1.71134	-1.69392	-1.80131
YGL001C	ERG26	C-3 sterol dehydrogenase, catalyzes the second of three steps required to remove two C-4 methyl groups from an intermediate in ergosterol biosynthesis	-0.104925	-0.072158	-0.102645	-0.478517	-0.458061	-0.49219	-0.133877	-0.11017	-0.0891158
YGL002W	ERP6	Protein with similarity to Emp24p and Erv25p, member of the p24 family involved in ER to Golgi transport; the authentic, non-tagged protein is detected in highly purified mitochondria in high-throughput studies	0.0464085	0.143752	0.240823	0.438425	0.46462	0.51804	0.423179	0.438797	0.349016
YGL004C	RPN14	Proteasome-interacting protein involved in the assembly of the base subcomplex of the 19S proteasome regulatory particle (RP); null mutants accumulate ubiquitinated Gcn4p and display decreased 26S proteasome stability; interacts with Rpt5p	0.0409235	-0.0437347	-0.054438	-0.243054	-0.149401	-0.312761	-0.235264	-0.266167	-0.308416
YGL005C	COG7	Component of the conserved oligomeric Golgi complex (Cog1p through Cog8p), a cytosolic tethering complex that functions in protein trafficking to mediate fusion of transport vesicles to Golgi compartments	-0.025558	-0.0747464	-0.107746	-0.0246881	-0.090409	-0.102609	0.0238955	0.103664	0.0776815
YGL006W	PMC1	Vacuolar Ca2+ ATPase involved in depleting cytosol of Ca2+ ions; prevents growth inhibition by activation of calcineurin in the presence of elevated concentrations of calcium; similar to mammalian PMCA1a	0.25334	0.00679045	0.0776997	0.217061	0.253022	0.403714	0.143208	0.168315	0.209479
YGL008C	PMA1	Plasma membrane H+-ATPase, pumps protons out of the cell; major regulator of cytoplasmic pH and plasma membrane potential; part of the P2 subgroup of cation-transporting ATPases	0.073333	0.00510122	-0.022382	0.248184	0.125979	0.229192	0.1194	0.200256	0.124956
YGL009C	LEU1	Isopropylmalate isomerase, catalyzes the second step in the leucine biosynthesis pathway	-0.48027	-0.402607	-0.469293	-1.08092	-1.1039	-1.13648	-1.13563	-1.13856	-1.16177
YGL011C	SCL1	Alpha 1 subunit of the 20S proteasome involved in the degradation of ubiquitinated substrates; 20S proteasome is the core complex of the 26S proteasome; essential for growth; detected in the mitochondria	0.0443815	0.077506	0.0684889	0.310743	0.253578	0.318622	0.15547	0.154986	0.160538
YGL012W	ERG4	C-24(28) sterol reductase, catalyzes the final step in ergosterol biosynthesis; mutants are viable, but lack ergosterol	-0.0985509	-0.286332	-0.318707	0.134492	-0.114431	-0.0487904	0.189888	0.0685887	-0.034288
YGL013C	PDR1	Zinc cluster protein that is a master regulator involved in recruiting other zinc cluster proteins to pleiotropic drug response elements (PDREs) to fine tune the regulation of multidrug resistance genes	-0.21268	-0.0844044	-0.110453	0.210328	0.0904875	0.241685	0.0580345	0.1265	0.124949
YGL014W	PUF4	Member of the PUF protein family, which is defined by the presence of Pumilio homology domains that confer RNA binding activity; preferentially binds mRNAs encoding nucleolar ribosomal RNA-processing factors	0.164062	0.0527105	0.0746175	0.131693	0.123844	0.169121	-0.202317	-0.0576779	-0.11992
YGL016W	KAP122	Karyopherin beta, responsible for import of the Toa1p-Toa2p complex into the nucleus; binds to nucleoporins Nup1p and Nup2p; may play a role in regulation of pleiotropic drug resistance	0.1614	0.0866053	0.121539	0.177284	0.147386	-0.101618	0.107979	0.130613	0.0851162
YGL017W	ATE1	Arginyl-tRNA-protein transferase, catalyzes post-translational conjugation of arginine to the amino termini of acceptor proteins which are then subject to degradation via the N-end rule pathway	-0.0361071	0.0932737	0.001951	-0.037825	0.07161	-0.109706	0.124152	0.139217	0.0716477
YGL018C	JAC1	Specialized J-protein that functions with Hsp70 in Fe-S cluster biogenesis in mitochondria, involved in iron metabolism; contains a J domain typical to J-type chaperones; localizes to the mitochondrial matrix	-0.0839019	-0.0786527	0.012104	0.00624855	0.0570648	0.0492493	0.150285	0.0675977	-0.0057727
YGL019W	CKB1	Beta regulatory subunit of casein kinase 2, a Ser/Thr protein kinase with roles in cell growth and proliferation; the holoenzyme also contains CKA1, CKA2 and CKB2, the many substrates include transcription factors and all RNA polymerases	0.0732134	0.156279	0.196963	-0.265965	-0.0025489	-0.0335901	-0.0694191	0.0872437	0.133974
YGL020C	GET1	Subunit of the GET complex; involved in insertion of proteins into the ER membrane; required for the retrieval of HDEL proteins from the Golgi to the ER in an ERD2 dependent fashion and for normal mitochondrial morphology and inheritance	-0.129267	-0.0381325	-0.021356	0.033398	-0.144799	-0.0668036	0.269216	0.193642	0.267252
YGL021W	ALK1	Protein kinase; accumulation and phosphorylation are periodic during the cell cycle; phosphorylated in response to DNA damage; contains characteristic motifs for degradation via the APC pathway; similar to Alk2p and to mammalian haspins	0.121288	-0.0508214	0.0488112	0.0852041	-0.039554	-0.0498067	0.72602	0.907069	0.749591
YGL022W	STT3	Subunit of the oligosaccharyltransferase complex of the ER lumen, which catalyzes asparagine-linked glycosylation of newly synthesized proteins; forms a subcomplex with Ost3p and Ost4p and is directly involved in catalysis	0.0604805	-0.0269727	-0.100572	0.202698	0.056874	0.112169	-0.106375	-0.0602867	-0.261859
YGL023C	PIB2	Protein binding phosphatidylinositol 3-phosphate, involved in telomere-proximal repression of gene expression; similar to Fab1 and Vps27	-0.217258	-0.0774808	0.0474951	0.0817008	0.0193355	0.0555148	-0.160763	0.108284	-0.166734
YGL025C	PGD1	Subunit of the RNA polymerase II mediator complex; associates with core polymerase subunits to form the RNA polymerase II holoenzyme; essential for basal and activated transcription; direct target of Cyc8p-Tup1p transcriptional corepressor	-0.150447	-0.0582647	-0.107935	-0.0730031	0.0667522	-0.0306012	-0.0247478	-0.100862	-0.0601577
YGL026C	TRP5	Tryptophan synthase, catalyzes the last step of tryptophan biosynthesis; regulated by the general control system of amino acid biosynthesis	-0.18049	-0.173059	-0.213951	-0.405837	-0.45134	-0.376522	-0.711194	-0.770424	-0.767683
YGL027C	CWH41	Processing alpha glucosidase I, ER type II integral membrane N-glycoprotein involved in assembly of cell wall beta 1,6 glucan and asparagine-linked protein glycosylation; also involved in ER protein quality control and sensing of ER stress	-0.230071	-0.273291	-0.283211	-0.187139	-0.138537	-0.182567	-0.010064	0.0338963	-0.0272315
YGL028C	SCW11	Cell wall protein with similarity to glucanases; may play a role in conjugation during mating based on its regulation by Ste12p	-0.0871439	-0.0415511	0.0947809	-0.0556841	0.0780955	-0.0989663	-0.280346	-0.244733	-0.260779
YGL030W	RPL30	Protein component of the large (60S) ribosomal subunit, has similarity to rat L30 ribosomal protein; involved in pre-rRNA processing in the nucleolus; autoregulates splicing of its transcript	0.202824	0.182545	0.320716	0.627162	0.401943	0.332343	0.222105	0.309971	0.418163
YGL031C	RPL24A	Ribosomal protein L30 of the large (60S) ribosomal subunit, nearly identical to Rpl24Bp and has similarity to rat L24 ribosomal protein; not essential for translation but may be required for normal translation rate	-0.136787	0.0200758	-0.135565	0.0127444	-0.11658	0.0400185	-0.150742	-0.151725	-0.24732
YGL035C	MIG1	Transcription factor involved in glucose repression; sequence specific DNA binding protein containing two Cys2His2 zinc finger motifs; regulated by the SNF1 kinase and the GLC7 phosphatase	-0.290515	-0.162432	0.0308268	-0.12032	-0.232171	-0.1934	-0.148595	-0.178505	-0.0903272
YGL036W	YGL036W	Putative protein of unknown function; green fluorescent protein (GFP)-fusion protein localizes to the cytoplasm; YGL036W is not an essential gene	0.128862	0.0117546	-0.012555	-0.00835805	0.100454	0.113978	0.141215	0.210071	0.157234
YGL037C	PNC1	Nicotinamidase that converts nicotinamide to nicotinic acid as part of the NAD(+) salvage pathway, required for life span extension by calorie restriction; PNC1 expression responds to all known stimuli that extend replicative life span	-0.0423426	0.0386342	-0.145689	0.14262	0.0531871	0.0606331	-1.26664	-1.32451	-1.29585
YGL038C	OCH1	Mannosyltransferase of the cis-Golgi apparatus, initiates the polymannose outer chain elongation of N-linked oligosaccharides of glycoproteins	-0.1406	-0.129595	-0.150584	0.0476403	0.0179138	-0.0960132	-0.120009	-0.108245	-0.050988
YGL039W	YGL039W	Oxidoreductase shown to reduce carbonyl compounds to chiral alcohols	0.0554546	0.0361165	-0.091104	-0.142914	-0.151937	-0.156469	0.647378	0.50657	0.674954
YGL040C	HEM2	Aminolevulinate dehydratase, a homo-octameric enzyme, catalyzes the conversion of 5-aminolevulinate to porphobilinogen, the second step in heme biosynthesis; enzymatic activity is zinc-dependent; localizes to the cytoplasm and nucleus	-0.132805	-0.114424	-0.086978	-0.131712	-0.135691	-0.116497	-0.112782	-0.146583	-0.1084
YGL041W-A	YGL041W-A	Putative protein of unknown function, conserved in fungi; identified by expression profiling and mass spectrometry	0.0068799	-0.0597503	0.102335	-0.215496	0.249754	0.155737	0.159702	0.198329	0.0954457
YGL043W	DST1	General transcription elongation factor TFIIS, enables RNA polymerase II to read through blocks to elongation by stimulating cleavage of nascent transcripts stalled at transcription arrest sites	-0.104819	-0.0134375	-0.074758	-0.111374	-0.142601	-0.0453702	0.131992	0.119858	0.0815074
YGL044C	RNA15	Cleavage and polyadenylation factor I (CF I) component involved in cleavage and polyadenylation of mRNA 3' ends; interacts with the A-rich polyadenylation signal in complex with Rna14p and Hrp1p	-0.0195022	0.0152972	0.0323001	-0.143997	0.0037978	-0.0490951	0.216426	0.0793867	0.259825
YGL047W	ALG13	Catalytic component of UDP-GlcNAc transferase, required for the second step of dolichyl-linked oligosaccharide synthesis; anchored to the ER membrane via interaction with Alg14p; similar to bacterial and human glycosyltransferases	0.025597	0.105912	0.0871955	0.468375	0.554767	0.501199	-0.203327	-0.170463	-0.0733943
YGL048C	RPT6	One of six ATPases of the 19S regulatory particle of the 26S proteasome involved in the degradation of ubiquitinated substrates; bound by ubiquitin-protein ligases Ubr1p and Ufd4p; localized mainly to the nucleus throughout the cell cycle	-0.0583865	0.0192609	-0.046268	0.182654	0.163665	0.261269	0.104795	0.0549181	0.0122562
YGL049C	TIF4632	Translation initiation factor eIF4G, subunit of the mRNA cap-binding protein complex (eIF4F) that also contains eIF4E (Cdc33p); associates with the poly(A)-binding protein Pab1p, also interacts with eIF4A (Tif1p); homologous to Tif4631p	0.068247	0.0738238	-0.057185	-0.00431885	0.0043059	0.0298963	-0.199647	-0.135239	-0.135266
YGL050W	TYW3	tRNA methyltransferase required for synthesis of wybutosine, a modified guanosine found at the 3'-position adjacent to the anticodon of phenylalanine tRNA which supports reading frame maintenance by stabilizing codon-anticodon interactions	-0.0121132	0.0558739	0.000654	-0.0594021	-0.064705	-0.0152218	-0.0034675	0.0068939	0.0004831
YGL051W	MST27	Putative integral membrane protein, involved in vesicle formation; forms complex with Mst28p; member of DUP240 gene family; binds COPI and COPII vesicles	0.311883	0.0514394	0.0426407	-0.0802781	0.227416	0.212019	0.552474	0.27584	0.475971
YGL053W	PRM8	Pheromone-regulated protein with 2 predicted transmembrane segments and an FF sequence, a motif involved in COPII binding; forms a complex with Prp9p in the ER; member of DUP240 gene family	0.0153794	-0.00518242	-0.014708	-0.109519	-0.157291	-0.16284	0.156823	0.202744	0.27528
YGL054C	ERV14	Protein localized to COPII-coated vesicles, involved in vesicle formation and incorporation of specific secretory cargo; required for the delivery of bud-site selection protein Axl2p to cell surface; related to Drosophila cornichon	-0.0723819	-0.0343084	-0.063957	-0.0320391	-0.137457	-0.0791283	-0.142262	-0.228739	-0.204664
YGL055W	OLE1	Delta(9) fatty acid desaturase, required for monounsaturated fatty acid synthesis and for normal distribution of mitochondria	0.110619	-0.0295651	-0.074325	-0.00786705	-0.146878	-0.0440458	-0.190379	-0.18147	-0.207573
YGL056C	SDS23	One of two S. cerevisiae homologs (Sds23p and Sds24p) of the S. pombe Sds23 protein, which is implicated in APC/cyclosome regulation; involved in cell separation during budding	-0.0300322	-0.00156521	-0.00553	0.170161	0.169335	0.0467074	-0.0499511	0.0750837	0.0460369
YGL058W	RAD6	Ubiquitin-conjugating enzyme (E2), involved in postreplication repair (as a heterodimer with Rad18p), DSBR and checkpoint control (as a heterodimer with Bre1p), ubiquitin-mediated N-end rule protein degradation (as a heterodimer with Ubr1p	0.0252617	-0.00861122	-0.015219	0.459958	0.0971465	0.302222	0.0457255	0.233912	0.109552
YGL060W	YBP2	Central kinetochore associated protein that mediates mitotic progression; interacts with several central kinetochore proteins and the centromeric histone Cse4p; role in resistance to oxidative stress; similarity to Ybp1p and Slk19p	0.0526461	0.0405017	0.0738966	0.208915	0.167469	0.120057	0.127893	0.035476	0.0712946
YGL061C	DUO1	Essential subunit of the Dam1 complex (aka DASH complex), couples kinetochores to the force produced by MT depolymerization thereby aiding in chromosome segregation; is transferred to the kinetochore prior to mitosis	0.0162563	-0.0464227	0.0094018	-0.0137231	-0.014679	-0.0556628	0.269146	0.195084	0.205485
YGL062W	PYC1	Pyruvate carboxylase isoform, cytoplasmic enzyme that converts pyruvate to oxaloacetate; highly similar to isoform Pyc2p but differentially regulated; mutations in the human homolog are associated with lactic acidosis	-0.136619	-0.200849	-0.220199	-0.1744	-0.302294	-0.276906	0.111269	0.0373725	0.0375135
YGL064C	MRH4	Mitochondrial ATP-dependent RNA helicase of the DEAD-box family, plays an essential role in mitochondrial function	-0.119161	-0.13942	-0.104176	-0.162124	-0.126283	-0.135367	-0.204718	-0.265507	-0.183011
YGL065C	ALG2	Mannosyltransferase that catalyzes two consecutive steps in the N-linked glycosylation pathway; alg2 mutants exhibit temperature-sensitive growth and abnormal accumulation of the lipid-linked oligosaccharide Man2GlcNAc2-PP-Dol	0.0055738	-0.0483405	-0.022693	-0.158142	-0.138041	-0.131569	-0.0293553	0.110262	0.0806589
YGL066W	SGF73	SAGA complex subunit with a role in anchoring the deubiquitination module into SAGA and SLIK complexes; involved in preinitiation complex assembly at promoters; human ortholog ataxin-7 is associated with spinocerebellar ataxia diseases	-0.017514	-0.0613286	-0.007081	0.00660365	-0.066322	-0.0545908	-0.148968	-0.174752	-0.244613
YGL067W	NPY1	NADH diphosphatase (pyrophosphatase), hydrolyzes the pyrophosphate linkage in NADH and related nucleotides; localizes to peroxisomes	0.172264	0.13522	0.108777	-0.00207385	0.0775191	0.0775004	0.0261155	0.165929	0.186343
YGL068W	MNP1	Protein associated with the mitochondrial nucleoid; putative mitochondrial ribosomal protein with similarity to E. coli L7/L12 ribosomal protein; required for normal respiratory growth	-0.209219	-0.07978	-0.223916	0.00804395	-0.075762	0.175414	-0.104919	-0.0267423	-0.122837
YGL070C	RPB9	RNA polymerase II subunit B12.6; contacts DNA; mutations affect transcription start site selection and fidelity of transcription	0.0577024	0.0344074	0.105052	-0.111274	-0.03432	-0.128144	0.108053	0.0903797	0.160249
YGL071W	AFT1	Transcription factor involved in iron utilization and homeostasis; binds the consensus site PyPuCACCCPu and activates the expression of target genes in response to changes in iron availability	0.115674	-0.110207	-0.212627	-0.15369	-0.136597	-0.199155	-0.0689931	-0.150925	-0.170875
YGL073W	HSF1	Trimeric heat shock transcription factor, activates multiple genes in response to stresses that include hyperthermia; recognizes variable heat shock elements (HSEs) consisting of inverted NGAAN repeats; posttranslationally regulated	-0.0143749	-0.0119772	-0.108534	0.098621	0.119916	0.132088	-0.182588	-0.173466	-0.174899
YGL075C	MPS2	Essential membrane protein localized at the nuclear envelope and spindle pole body (SPB), required for insertion of the newly duplicated SPB into the nuclear envelope; potentially phosphorylated by Cdc28p	-0.103214	0.118874	-0.039629	0.280161	0.169602	0.305365	0.122133	0.0868397	0.212805
YGL076C	RPL7A	Protein component of the large (60S) ribosomal subunit, nearly identical to Rpl7Bp and has similarity to E. coli L30 and rat L7 ribosomal proteins; contains a conserved C-terminal Nucleic acid Binding Domain (NDB2)	-0.0536726	0.0149806	-0.001718	0.0807926	0.0480213	0.0528073	-0.106305	-0.0785684	-0.0738419
YGL078C	DBP3	Putative ATP-dependent RNA helicase of the DEAD-box family involved in ribosomal biogenesis	-0.0407008	0.0686405	0.0275334	-0.0741401	-0.113374	-0.0652815	-0.20066	-0.268332	-0.27365
YGL079W	YGL079W	Putative protein of unknown function; likely member of BLOC complex involved in endosomal cargo sorting; null mutant is sensitive to drug inducing secretion of vacuolar cargo; GFP-fusion protein localizes to the endosome	-0.146611	0.00877155	0.0164104	0.0440456	0.226203	-0.00597345	0.298277	0.447289	0.452407
YGL080W	FMP37	Putative protein of unknown function; highly conserved across species and orthologous to human gene BRP44L; the authentic, non-tagged protein is detected in highly purified mitochondria in high-throughput studies	0.027732	-0.00903742	-0.095963	0.158854	0.327795	0.110262	0.0671635	0.104174	0.155454
YGL082W	YGL082W	Putative protein of unknown function; predicted prenylation/proteolysis target of Afc1p and Rce1p; green fluorescent protein (GFP)-fusion protein localizes to the cytoplasm and nucleus; YGL082W is not an essential gene	-0.0475636	0.0187437	-0.061842	0.0608209	0.116018	0.0363804	0.138609	0.124261	0.194816
YGL083W	SCY1	Putative kinase, suppressor of GTPase mutant, similar to bovine rhodopsin kinase	0.0010698	0.101109	-0.017745	0.0915311	0.24554	0.148388	-0.153215	-0.0715757	-0.167832
YGL084C	GUP1	Plasma membrane protein involved in remodeling GPI anchors; member of the MBOAT family of putative membrane-bound O-acyltransferases; proposed to be involved in glycerol transport	0.63057	0.177351	0.315477	0.870227	0.744471	0.566057	0.916408	0.715519	0.792907
YGL086W	MAD1	Coiled-coil protein involved in the spindle-assembly checkpoint; phosphorylated by Mps1p upon checkpoint activation which leads to inhibition of the activity of the anaphase promoting complex; forms a complex with Mad2p	0.0518541	-0.0754053	0.0244779	-0.0525631	-0.037336	-0.112226	0.0955505	0.047657	0.0165602
YGL087C	MMS2	Ubiquitin-conjugating enzyme variant involved in error-free postreplication repair; forms a heteromeric complex with Ubc13p, an active ubiquitin-conjugating enzyme; cooperates with chromatin-associated RING finger proteins, Rad18p and Rad5p	0.0876057	0.119564	0.114413	0.0582685	0.015314	0.0558643	-0.0243507	-0.129389	-0.11774
YGL091C	NBP35	Essential iron-sulfur cluster binding protein localized in the cytoplasm; forms a complex with Cfd1p that is involved in iron-sulfur protein assembly in the cytosol; similar to P-loop NTPases	-0.0582712	-0.046133	-0.110331	0.057331	0.102125	0.156936	0.165584	0.0317054	0.134367
YGL092W	NUP145	Essential nucleoporin, catalyzes its own cleavage in vivo to generate a C-terminal fragment that assembles into the Nup84p subcomplex of the nuclear pore complex, and an N-terminal fragment of unknown function that is homologous to Nup100p	-0.000507	-0.030045	-0.046144	-0.0648051	-0.070427	-0.116373	-0.193162	-0.101268	-0.137966
YGL094C	PAN2	Essential subunit of the Pan2p-Pan3p poly(A)-ribonuclease complex, which acts to control poly(A) tail length and regulate the stoichiometry and activity of postreplication repair complexes	0.320806	0.102485	0.190594	0.101155	0.359344	0.168746	0.12633	0.172319	0.208345
YGL095C	VPS45	Protein of the Sec1p/Munc-18 family, essential for vacuolar protein sorting; required for the function of Pep12p and the early endosome/late Golgi SNARE Tlg2p; essential for fusion of Golgi-derived vesicles with the prevacuolar compartment	0.115448	0.0222041	0.0286533	-0.111597	-0.056011	-0.156286	-0.0424448	-0.137288	-0.146016
YGL097W	SRM1	Nucleotide exchange factor for Gsp1p, localizes to the nucleus, required for nucleocytoplasmic trafficking of macromolecules; suppressor of the pheromone response pathway; potentially phosphorylated by Cdc28p	0.0098946	0.0893672	0.00249	0.0775928	-0.029485	0.0753946	0.0106685	0.0277251	-0.0301486
YGL098W	USE1	Essential SNARE protein localized to the ER, involved in retrograde traffic from the Golgi to the ER; forms a complex with the SNAREs Sec22p, Sec20p and Ufe1p	0.0081047	-0.0360816	0.0434489	0.179855	0.0699166	0.0402341	0.240236	0.217145	0.284222
YGL099W	LSG1	Putative GTPase involved in 60S ribosomal subunit biogenesis; required for the release of Nmd3p from 60S subunits in the cytoplasm	0.11383	0.111061	0.0852368	0.0316304	0.0567679	0.0397223	-0.18902	-0.106277	-0.139174
YGL100W	SEH1	Nuclear pore protein that is part of the evolutionarily conserved Nup84p complex (Nup84p, Nup85p, Nup120p, Nup145p, and Seh1p); homologous to Sec13p	-0.0733069	0.051796	0.043385	0.112551	0.0236938	0.122094	0.271061	0.2874	0.298706
YGL101W	YGL101W	Putative protein of unknown function; non-essential gene with similarity to YBR242W; interacts with the DNA helicase Hpr5p	-0.171286	-0.207516	-0.154536	-0.0719781	-0.024591	-0.0948772	0.0611205	-0.0718103	0.0748702
YGL103W	RPL28	Ribosomal protein of the large (60S) ribosomal subunit, has similarity to E. coli L15 and rat L27a ribosomal proteins; may have peptidyl transferase activity; can mutate to cycloheximide resistance	-0.129517	0.020072	-0.136572	-0.0143141	-0.140032	0.0272074	-0.145588	-0.101672	-0.149329
YGL105W	ARC1	Protein that binds tRNA and methionyl- and glutamyl-tRNA synthetases (Mes1p and Gus1p), delivering tRNA to them, stimulating catalysis, and ensuring their localization to the cytoplasm; also binds quadruplex nucleic acids	-0.0828769	-0.00627032	-0.070052	-0.142947	-0.142722	-0.0724371	-0.0981186	-0.121387	-0.0957582
YGL106W	MLC1	Essential light chain for Myo1p, light chain for Myo2p; stabilizes Myo2p by binding to the neck region; interacts with Myo1p, Iqg1p, and Myo2p to coordinate formation and contraction of the actomyosin ring with targeted membrane deposition	-0.131754	0.0872876	-0.002653	0.0974215	0.0691334	0.221484	0.240933	0.259693	0.283634
YGL107C	RMD9	Mitochondrial protein required for respiratory growth; mutant phenotype and genetic interactions suggest a role in delivering mt mRNAs to ribosomes; located on matrix face of the inner membrane and loosely associated with mitoribosomes	-0.0379986	-0.140102	-0.0542	-0.0265691	0.0131437	-0.0880823	-0.375238	-0.282149	-0.336213
YGL108C	YGL108C	Protein of unknown function, predicted to be palmitoylated; green fluorescent protein (GFP)-fusion protein localizes to the cell periphery	-0.0794769	-0.0769888	-0.122429	-0.141385	-0.0110145	-0.0777183	0.21403	0.297743	0.219397
YGL110C	CUE3	Protein of unknown function; has a CUE domain that binds ubiquitin, which may facilitate intramolecular monoubiquitination	0.418115	0.0525947	0.265168	0.470526	0.228102	0.465074	0.374463	0.410709	0.274614
YGL111W	NSA1	Constituent of 66S pre-ribosomal particles, involved in 60S ribosomal subunit biogenesis	0.0302538	0.0904089	0.0769838	-0.0668481	-0.13394	-0.0566009	0.132945	0.0778967	0.0491274
YGL112C	TAF6	Subunit (60 kDa) of TFIID and SAGA complexes, involved in transcription initiation of RNA polymerase II and in chromatin modification, similar to histone H4	-0.0435665	-0.0693465	-0.062583	0.180143	0.0334338	0.0776042	0.150441	0.178235	0.140337
YGL114W	YGL114W	Putative protein of unknown function; predicted member of the oligopeptide transporter (OPT) family of membrane transporters	0.12076	-0.256598	-0.108971	-0.195149	-0.124285	-0.165691	0.0466975	0.0688947	0.11917
YGL115W	SNF4	Activating gamma subunit of the AMP-activated Snf1p kinase complex (contains Snf1p and a Sip1p/Sip2p/Gal83p family member); activates glucose-repressed genes, represses glucose-induced genes; role in sporulation, and peroxisome biogenesis	0.0214208	-0.044528	0.0189723	0.00088315	0.0721969	-0.123639	0.0978155	0.128276	0.0937303
YGL117W	YGL117W	Putative protein of unknown function	-0.887974	-0.861794	-0.849698	-1.54754	-1.61358	-1.67829	-1.06949	-0.997341	-1.01232
YGL119W	ABC1	Protein required for ubiquinone (coenzyme Q) biosynthesis and for respiratory growth; exhibits genetic interaction with COQ9, suggesting a common function; similar to prokaryotic proteins involved in early steps of ubiquinone biosynthesis	-0.0189968	-0.0280852	-0.046905	-0.0120351	-0.129813	-0.174481	-0.208815	-0.221733	-0.261014
YGL120C	PRP43	RNA helicase in the DEAH-box family, functions in both RNA polymerase I and polymerase II transcript metabolism, involved in release of the lariat-intron from the spliceosome	0.0990718	0.0842317	0.0884105	-0.0234321	-0.095586	-0.0451814	-0.02467	-0.0294214	0.0280616
YGL122C	NAB2	Nuclear polyadenylated RNA-binding protein required for nuclear mRNA export and poly(A) tail length control; binds nuclear pore protein Mlp1p; autoregulates mRNA levels; related to human hnRNPs; nuclear localization sequence binds Kap104p	0.105025	0.120267	0.0930652	0.0525723	0.0395642	0.072281	0.0333865	0.166	0.0832445
YGL123W	RPS2	Protein component of the small (40S) subunit, essential for control of translational accuracy; phosphorylation by C-terminal domain kinase I (CTDK-I) enhances translational accuracy; methylated on one or more arginine residues by Hmt1p	0.0725754	0.0676894	0.0967699	0.261792	0.101839	0.152592	0.0153125	-0.0379908	0.0261394
YGL124C	MON1	Protein required for fusion of cvt-vesicles and autophagosomes with the vacuole; associates, as a complex with Ccz1p, with a perivacuolar compartment; potential Cdc28p substrate	-0.0654249	-0.248536	-0.530544	-0.666109	-0.04635	-0.0728272	-0.473272	-0.309332	-0.501367
YGL125W	MET13	Major isozyme of methylenetetrahydrofolate reductase, catalyzes the reduction of 5,10-methylenetetrahydrofolate to 5-methyltetrahydrofolate in the methionine biosynthesis pathway	0.312336	0.259597	0.139415	-0.13021	-0.094242	-0.131606	-1.20133	-1.27688	-1.23508
YGL126W	SCS3	Protein required for inositol prototrophy, identified as an ortholog of the FIT family of proteins involved in triglyceride droplet biosynthesis; disputed role in the synthesis of inositol phospholipids from inositol	0.39086	0.105901	0.265087	0.315414	0.129347	0.143888	-0.0325201	-0.136943	-0.125762
YGL127C	SOH1	Subunit of the RNA polymerase II mediator complex; associates with core polymerase subunits to form the RNA polymerase II holoenzyme; involved in telomere maintenance; conserved with other metazoan MED31 subunits	-0.0411462	0.114394	0.113889	-0.0411781	0.154151	0.178626	-0.138734	0.11132	0.296461
YGL128C	CWC23	Component of a complex containing Cef1p, putatively involved in pre-mRNA splicing; has similarity to E. coli DnaJ and other DnaJ-like proteins and to S. pombe Cwf23p	0.653426	0.435645	-0.005088	-2.00272	-1.22767	-1.46726	-1.70608	-1.76328	-1.48728
YGL129C	RSM23	Mitochondrial ribosomal protein of the small subunit, has similarity to mammalian apoptosis mediator proteins; null mutation prevents induction of apoptosis by overproduction of metacaspase Mca1p	-0.0925069	-0.0905889	-0.128042	0.0552729	-0.026482	-0.00012755	-0.172976	-0.203609	-0.133226
YGL130W	CEG1	Alpha (guanylyltransferase) subunit of the mRNA capping enzyme, a heterodimer (the other subunit is CET1, an RNA 5'-triphosphatase) involved in adding the 5' cap to mRNA; the mammalian enzyme is a single bifunctional polypeptide	0.0101911	0.0723873	0.0111744	0.0171437	0.0258024	0.0719536	0.184931	0.264024	0.168347
YGL133W	ITC1	Component of the ATP-dependent Isw2p-Itc1p chromatin remodeling complex, required for repression of a-specific genes, repression of early meiotic genes during mitotic growth, and repression of INO1	0.0479963	-0.0942341	0.009332	0.0522996	0.0967297	0.0754807	0.112404	0.195671	0.128124
YGL137W	SEC27	Essential beta'-coat protein of the COPI coatomer, involved in ER-to-Golgi and Golgi-to-ER transport; contains WD40 domains that mediate cargo selective interactions; 45% sequence identity to mammalian beta'-COP	0.0827567	0.126017	0.103971	0.0535916	0.0603918	0.0135541	0.100593	0.0906007	0.119883
YGL139W	FLC3	Putative FAD transporter, similar to Flc1p and Flc2p; localized to the ER	0.121073	-0.0904966	0.0277743	0.0570441	0.125774	-0.0163509	0.0973655	0.420969	0.0159893
YGL140C	YGL140C	Putative protein of unknown function; non-essential gene; contains multiple predicted transmembrane domains	0.289932	0.0234004	0.0979713	0.355785	0.276641	0.155598	0.691555	0.551465	0.680203
YGL141W	HUL5	Ubiquitin-conjugating enzyme (E4), elongates polyubiquitin chains on substrate proteins; works in opposition to Ubp6p polyubiquitin-shortening activity; required for retrograde transport of misfolded proteins into cytoplasm during ERAD	-0.0901609	0.00684041	-0.006254	0.413511	0.211355	0.166319	-0.333334	-0.215432	-0.320608
YGL143C	MRF1	Mitochondrial translation release factor, involved in stop codon recognition and hydrolysis of the peptidyl-tRNA bond during mitochondrial translation; lack of MRF1 causes mitochondrial genome instability	0.0292617	-0.173134	-0.025235	-0.365714	-0.194764	-0.338144	-0.15091	-0.238491	-0.154911
YGL145W	TIP20	Peripheral membrane protein required for fusion of COPI vesicles with the ER; prohibits back-fusion of COPII vesicles with the ER; forms a tethering complex with Sec39p and Dsl1p that interacts with ER SNAREs Sec20p and Use1p	0.023306	-0.00371212	0.0219926	0.00233295	-0.0115366	-0.0382887	0.0060195	-0.0576477	-0.0279915
YGL147C	RPL9A	Protein component of the large (60S) ribosomal subunit, nearly identical to Rpl9Bp and has similarity to E. coli L6 and rat L9 ribosomal proteins	0.003031	0.0594933	0.0116981	0.227732	0.107938	0.146036	1.75e-05	-0.0186352	-0.0566967
YGL148W	ARO2	Bifunctional chorismate synthase and flavin reductase, catalyzes the conversion of 5-enolpyruvylshikimate 3-phosphate (EPSP) to form chorismate, which is a precursor to aromatic amino acids	-0.217487	-0.121165	-0.170483	-0.367987	-0.388566	-0.314448	-0.315951	-0.320189	-0.362506
YGL150C	INO80	ATPase, subunit of a complex containing actin and several actin-related proteins that has chromatin remodeling activity and 3' to 5' DNA helicase activity in vitro; has a role in modulating stress gene transcription	0.0508037	-0.0924381	-0.04179	-0.0452121	-0.046069	-0.00413925	-0.0282908	0.0546814	0.0377628
YGL151W	NUT1	Component of the RNA polymerase II mediator complex, which is required for transcriptional activation and also has a role in basal transcription	0.105228	-0.0271094	0.0350854	0.0269757	0.173891	0.0951564	0.231383	0.194041	0.106062
YGL153W	PEX14	Peroxisomal membrane peroxin that is a central component of the peroxisomal protein import machinery; interacts with both PTS1 (Pex5p) and PTS2 (Pex7p), peroxisomal matrix protein signal recognition factors and membrane receptor Pex13p	-0.0144288	-0.107371	-0.02837	-0.243371	-0.27223	-0.251755	-0.0061145	-0.0537701	-0.0705134
YGL155W	CDC43	Beta subunit of geranylgeranyltransferase type I, catalyzes geranylgeranylation to the cysteine residue in proteins containing a C-terminal CaaX sequence ending in Leu or Phe; has substrates important for morphogenesis	-0.0991129	-0.0859434	0.203398	-0.0253571	-0.045826	-0.158612	0.0189815	-0.13078	0.0402818
YGL156W	AMS1	Vacuolar alpha mannosidase, involved in free oligosaccharide (fOS) degradation; delivered to the vacuole in a novel pathway separate from the secretory pathway	0.500488	0.322112	0.486185	0.335448	0.28833	0.344675	-1.2046	-1.20948	-1.34341
YGL157W	YGL157W	NADPH-dependent aldehyde reductase, utilizes aromatic and alophatic aldehyde substrates; member of the short-chain dehydrogenase/reductase superfamily	0.399188	0.400624	0.203657	0.144962	0.0309587	0.137643	0.412532	0.279998	0.420938
YGL159W	YGL159W	Putative protein of unknown function; deletion mutant has no detectable phenotype	0.0256226	0.0412598	-0.081571	-0.312064	-0.02064	-0.100639	0.225267	0.131404	0.162024
YGL161C	YIP5	Protein that interacts with Rab GTPases, localized to late Golgi vesicles; computational analysis of large-scale protein-protein interaction data suggests a possible role in vesicle-mediated transport	0.0288355	0.0188552	-0.036097	-0.0173881	0.282711	0.210369	0.315038	0.161741	0.361667
YGL164C	YRB30	RanGTP-binding protein, inhibits RanGAP1 (Rna1p)-mediated GTP hydrolysis of RanGTP (Gsp1p); shares similarity to proteins in other fungi but not in higher eukaryotes	0.0949828	0.15507	0.0390961	0.0376047	0.119651	-0.00571125	0.178871	0.178604	0.185628
YGL167C	PMR1	High affinity Ca2+/Mn2+ P-type ATPase required for Ca2+ and Mn2+ transport into Golgi; involved in Ca2+ dependent protein sorting and processing; mutations in human homolog ATP2C1 cause acantholytic skin condition Hailey-Hailey disease	0.0020786	-0.0327926	-0.111498	0.0656844	-0.0081928	0.0438498	-0.09492	-0.0115071	-0.0810739
YGL169W	SUA5	Single-stranded telomeric DNA-binding protein, required for normal telomere length; null mutant lacks N6-threonylcarbamoyl adenosine (t6A) modification in the anticodon loop of ANN-decoding tRNA; member of conserved YrdC/Sua5 family	0.0390519	0.0142829	0.0734973	-0.125707	-0.065429	-0.0960332	0.299829	0.254126	0.360007
YGL171W	ROK1	ATP-dependent RNA helicase of the DEAD box family; required for 18S rRNA synthesis	-0.01774	0.0462523	-0.073553	-0.28249	-0.25809	-0.214344	-0.301643	-0.283082	-0.319261
YGL172W	NUP49	Subunit of the Nsp1p-Nup57p-Nup49p-Nic96p subcomplex of the nuclear pore complex (NPC), required for nuclear export of ribosomes	-0.046542	-0.0537896	-0.015075	0.0291443	-0.032749	-0.00637025	-0.0408159	0.0115759	0.0215312
YGL173C	KEM1	Evolutionarily-conserved 5'-3' exonuclease component of cytoplasmic processing (P) bodies involved in mRNA decay; plays a role in microtubule-mediated processes, filamentous growth, ribosomal RNA maturation, and telomere maintenance	0.0863439	0.0328081	0.0233347	0.21795	0.19547	0.210724	-0.0275841	0.101215	0.0331066
YGL174W	BUD13	Subunit of the RES complex, which is required for nuclear pre-mRNA retention and splicing; involved in bud-site selection; diploid mutants display a unipolar budding pattern instead of the wild-type bipolar pattern	-0.0178575	-0.0129873	0.0672695	-0.229541	-0.014533	-0.066632	0.103148	0.207767	0.211867
YGL178W	MPT5	Member of the Puf family of RNA-binding proteins; binds to mRNAs encoding chromatin modifiers and spindle pole body components; involved in longevity, maintenance of cell wall integrity, and sensitivity to and recovery from pheromone arrest	-0.0278311	0.101678	-0.240297	0.0774695	0.0975799	-0.00528085	-0.495163	-0.291796	-0.28836
YGL180W	ATG1	Protein ser/thr kinase required for vesicle formation in autophagy and the cytoplasm-to-vacuole targeting (Cvt) pathway; structurally required for phagophore assembly site formation; during autophagy forms a complex with Atg13p and Atg17p	0.131655	-0.420793	0.107316	0.321099	0.289851	0.0680093	-0.317215	-0.177339	-0.126551
YGL181W	GTS1	Arf3p GTPase Activating Protein (GAP) that localizes to endocytic patches; gts1 mutations affect budding, cell size, heat tolerance, sporulation, life span, ultradian rhythms; localizes to nucleus and induces flocculation when overexpressed	0.012728	0.0822097	-0.053184	0.057229	0.134423	0.100149	0.370815	0.52812	0.435618
YGL184C	STR3	Cystathionine beta-lyase, converts cystathionine into homocysteine	-0.172855	-0.113311	-0.076863	-1.03365	-1.03171	-1.04758	-0.306737	-0.448281	-0.491387
YGL185C	YGL185C	Putative protein with sequence similarity to hydroxyacid dehydrogenases; green fluorescent protein (GFP)-fusion protein localizes to the cytoplasm	0.111478	-0.0190626	-0.016018	-0.0697911	-0.0055018	-0.0200489	-0.102191	-0.130794	-0.164512
YGL186C	TPN1	Plasma membrane pyridoxine (vitamin B6) transporter; member of the purine-cytosine permease subfamily within the major facilitator superfamily; proton symporter with similarity to Fcy21p, Fcy2p, and Fcy22p	0.7296	0.563979	0.837509	0.47719	0.556199	0.530554	1.52443	1.28207	1.54871
YGL187C	COX4	Subunit IV of cytochrome c oxidase, the terminal member of the mitochondrial inner membrane electron transport chain; precursor N-terminal 25 residues are cleaved during mitochondrial import; phosphorylated; spermidine enhances translation	-0.229818	-0.284901	-0.345073	-0.337618	-0.297715	-0.246193	-0.662664	-0.735553	-0.709144
YGL189C	RPS26A	Protein component of the small (40S) ribosomal subunit; nearly identical to Rps26Bp and has similarity to rat S26 ribosomal protein	0.200919	0.13714	0.124206	0.208123	0.0209181	0.23763	-0.141177	-0.277837	-0.244445
YGL190C	CDC55	Non-essential regulatory subunit B of protein phosphatase 2A (PP2A), which has multiple roles in mitosis and protein biosynthesis; involved in regulation of mitotic exit; found in the nucleus of most cells, also at bud neck and bud tip	-0.0767029	-0.0193192	-0.065501	-0.0341521	0.0132823	0.03985	-0.31424	-0.301725	-0.29223
YGL191W	COX13	Subunit VIa of cytochrome c oxidase, which is the terminal member of the mitochondrial inner membrane electron transport chain; not essential for cytochrome c oxidase activity but may modulate activity in response to ATP	-0.25496	-0.269746	-0.22465	0.071358	0.0838535	0.177313	-0.500646	-0.550118	-0.541471
YGL194C	HOS2	Histone deacetylase required for gene activation via specific deacetylation of lysines in H3 and H4 histone tails; subunit of the Set3 complex, a meiotic-specific repressor of sporulation specific genes that contains deacetylase activity	-0.226274	-0.100102	0.0899163	0.0277237	-0.0011768	-0.0157142	0.0156035	0.0596285	0.311213
YGL195W	GCN1	Positive regulator of the Gcn2p kinase activity, forms a complex with Gcn20p; proposed to stimulate Gcn2p activation by an uncharged tRNA	0.125821	0.0419852	0.004924	0.0720649	0.0769084	0.0520887	0.0194195	0.0304631	0.0463002
YGL196W	DSD1	D-serine dehydratase (aka D-serine ammonia-lyase); converts D-serine to pyruvate and ammonia by a reaction dependent on pyridoxal 5'-phosphate and zinc; may play a role in D-serine detoxification; L-serine is not a substrate	-0.0933369	-0.0840848	-0.055086	-0.0733171	0.0260435	-0.0589817	0.227782	0.180866	0.257558
YGL197W	MDS3	Putative component of the TOR regulatory pathway; negative regulator of early meiotic gene expression; required, with Pmd1p, for growth under alkaline conditions; has an N-terminal kelch-like domain	0.005851	-0.087162	0.0896155	0.0436164	0.335591	0.338978	-0.0633189	-0.0043409	0.29891
YGL198W	YIP4	Protein that interacts with Rab GTPases, localized to late Golgi vesicles; computational analysis of large-scale protein-protein interaction data suggests a possible role in vesicle-mediated transport	0.165439	0.126309	0.0946935	0.314257	0.260212	0.171107	0.373282	0.199214	0.382731
YGL200C	EMP24	Integral membrane component of endoplasmic reticulum-derived COPII-coated vesicles, which function in ER to Golgi transport	0.124644	0.0449821	0.122184	-0.235383	0.0263787	-0.0616164	-0.0014765	-0.181609	-0.0756925
YGL201C	MCM6	Protein involved in DNA replication; component of the Mcm2-7 hexameric complex that binds chromatin as a part of the pre-replicative complex	-0.0653299	-0.0553349	-0.048781	0.00160385	-0.024693	0.0570302	-0.0150388	0.0250416	0.0135294
YGL202W	ARO8	Aromatic aminotransferase I, expression is regulated by general control of amino acid biosynthesis	-0.285313	-0.199918	-0.204232	-0.632809	-0.645772	-0.647285	-0.506324	-0.557243	-0.535263
YGL203C	KEX1	Protease involved in the processing of killer toxin and alpha factor precursor; cleaves Lys and Arg residues from the C-terminus of peptides and proteins	0.0326929	-0.0128475	0.0695392	-0.175814	-0.189874	-0.22897	0.0029685	0.0248047	0.00988881
YGL204C	YGL204C	Dubious open reading frame unlikely to encode a functional protein, based on available experimental and comparative sequence data	-0.200322	-0.177796	0.22357	-0.28362	-0.266984	-0.291882	0.188845	0.0487963	0.64305
YGL206C	CHC1	Clathrin heavy chain, subunit of the major coat protein involved in intracellular protein transport and endocytosis; two heavy chains form the clathrin triskelion structural component; the light chain (CLC1) is thought to regulate function	0.0827991	0.0924905	0.0409731	0.0704776	0.0457582	0.0230509	0.0515815	0.0915877	0.0695292
YGL207W	SPT16	Subunit of the heterodimeric FACT complex (Spt16p-Pob3p), which associates with chromatin via interaction with Nhp6Ap and Nhp6Bp, and reorganizes nucleosomes to facilitate access to DNA by RNA and DNA polymerases	0.0368414	-0.0116644	-0.028244	0.12367	0.11544	0.155286	-0.0668694	-0.0088854	-0.0610128
YGL210W	YPT32	Rab family GTPase, very similar to Ypt31p; involved in the exocytic pathway; mediates intra-Golgi traffic or the budding of post-Golgi vesicles from the trans-Golgi	-0.0184815	0.042232	-0.042403	-0.175749	-0.0111039	-0.0213458	0.259976	0.225213	0.291722
YGL211W	NCS6	Protein required for thiolation of the uridine at the wobble position of Gln, Lys, and Glu tRNAs; has a role in urmylation and in invasive and pseudohyphal growth; inhibits replication of Brome mosaic virus in S. cerevisiae	-0.137799	-0.24611	-0.124746	-0.539214	-0.561014	-0.236685	-0.36358	-0.356768	-0.239707
YGL212W	VAM7	Component of the vacuole SNARE complex involved in vacuolar morphogenesis; SNAP-25 homolog; functions with a syntaxin homolog Vam3p in vacuolar protein trafficking	0.01379	-0.00459012	0.0917467	0.0884008	-0.0038396	0.0394702	0.0927265	0.0658927	0.0470159
YGL213C	SKI8	Ski complex component and WD-repeat protein, mediates 3'-5' RNA degradation by the cytoplasmic exosome; also required for meiotic double-strand break recombination; null mutants have superkiller phenotype	-0.114796	-0.108638	-0.082016	-0.00903005	0.0161483	0.0186097	0.170165	0.0976587	0.010034
YGL216W	KIP3	Kinesin-related motor protein involved in mitotic spindle positioning	0.290718	0.124132	0.0562853	0.130529	0.0613044	0.119883	0.202007	0.0791677	0.208439
YGL220W	FRA2	Protein involved in negative regulation of transcription of iron regulon; forms an iron independent complex with Fra2p, Grx3p, and Grx4p; null mutant fails to repress iron regulon and is sensitive to nickel	0.423505	0.194679	0.279717	-0.470224	0.0214579	-0.0235947	-0.274772	-0.0837687	-0.319925
YGL221C	NIF3	Protein of unknown function, similar to Listeria monocytogenes major sigma factor (rpoD gene product); the authentic, non-tagged protein is detected in highly purified mitochondria in high-throughput studies	-0.0052992	0.0673519	0.004477	-0.0250001	-0.090549	-0.0568635	0.231545	0.126365	0.187005
YGL222C	EDC1	RNA-binding protein, activates mRNA decapping directly by binding to the mRNA substrate and enhancing the activity of the decapping proteins Dcp1p and Dcp2p; has a role in translation during heat stress	-0.301847	-0.355943	-0.329647	-0.66524	-0.219409	-0.115409	-0.144608	0.0164745	-0.137122
YGL223C	COG1	Essential component of the conserved oligomeric Golgi complex (Cog1p through Cog8p), a cytosolic tethering complex that functions in protein trafficking to mediate fusion of transport vesicles to Golgi compartments	-0.107201	-0.0202559	-0.030039	-0.180492	-0.058828	-0.021691	0.151457	0.0472201	0.179196
YGL224C	SDT1	Pyrimidine nucleotidase; overexpression suppresses the 6-AU sensitivity of transcription elongation factor S-II, as well as resistance to other pyrimidine derivatives	-0.238464	-0.245175	-0.112565	-0.593879	-0.632819	-0.836228	-0.843819	-0.893937	-0.749491
YGL225W	VRG4	Golgi GDP-mannose transporter; regulates Golgi function and glycosylation in Golgi	0.334454	0.0333891	0.116568	0.719755	0.422767	0.307034	0.233039	-0.189794	0.0577712
YGL226W	MTC3	Protein of unknown function; green fluorescent protein (GFP)-fusion protein localizes to the mitochondrion; mtc3 is synthetically sick with cdc13-1	0.0191212	-0.0156221	0.0294308	0.189904	0.280035	0.384344	0.5052	0.594829	0.552573
YGL227W	VID30	Protein involved in proteasome-dependent catabolite degradation of fructose-1,6-bisphosphatase (FBPase); binds FBPase; shifts the balance of nitrogen metabolism toward glutamate production; localizes to the nucleus and the cytoplasm	-0.0196267	-0.0827619	-0.123153	-0.0960661	-0.084832	-0.0699195	-0.258254	-0.267127	-0.162975
YGL228W	SHE10	Putative glycosylphosphatidylinositol (GPI)-anchored protein of unknown function; overexpression causes growth arrest	0.0023182	-0.0332912	-0.036663	-0.0768331	-0.107077	-0.019333	-0.0125479	-0.0202859	-0.0242716
YGL231C	EMC4	Member of a transmembrane complex required for efficient folding of proteins in the ER; null mutant displays induction of the unfolded protein response; human ortholog TMEM85 may function in apoptosis	-0.0838379	-0.0362916	-0.064216	0.00521685	0.017887	-0.0378288	0.0108215	0.120904	0.0530917
YGL232W	TAN1	Putative tRNA acetyltransferase, RNA-binding protein required for the formation of the modified nucleoside N(4)-acetylcytidine in serine and leucine tRNAs but not required for the same modification in 18S rRNA	-0.0770099	-0.0466814	0.021673	-0.121997	-0.128308	-0.0658587	-0.0399296	-0.119194	-0.0847017
YGL233W	SEC15	Essential 113kDa subunit of the exocyst complex (Sec3p, Sec5p, Sec6p, Sec8p, Sec10p, Sec15p, Exo70p, and Exo84p), which mediates polarized targeting of vesicles to active sites of exocytosis; Sec15p associates with Sec4p and vesicles	0.0146163	0.00187111	-0.04265	-0.0269921	-0.03708	-0.02514	-0.139749	-0.0444575	-0.0077813
YGL234W	ADE5	Bifunctional enzyme of the 'de novo' purine nucleotide biosynthetic pathway, contains aminoimidazole ribotide synthetase and glycinamide ribotide synthetase activities	-0.0565183	-0.0363127	-0.068835	-0.429557	-0.445637	-0.447783	-0.464912	-0.477154	-0.503225
YGL236C	MTO1	Mitochondrial protein, forms a heterodimer complex with Mss1p that performs the 5-carboxymethylaminomethyl modification of the wobble uridine base in mitochondrial tRNAs; required for respiration in paromomycin-resistant 15S rRNA mutants	-0.116364	-0.0994611	-0.00927	-0.149784	-0.0002324	-0.102444	-0.499764	-0.592726	-0.604779
YGL237C	HAP2	Subunit of the heme-activated, glucose-repressed Hap2p/3p/4p/5p CCAAT-binding complex, a transcriptional activator and global regulator of respiratory gene expression; contains sequences sufficient for both complex assembly and DNA binding	-0.368727	-0.0271533	-0.20548	-0.0538841	0.0433848	-0.2281	-0.155147	-0.32252	-0.10002
YGL238W	CSE1	Nuclear envelope protein that mediates the nuclear export of importin alpha (Srp1p), homolog of metazoan CAS protein, required for accurate chromosome segregation	0.0234645	-0.0289354	-0.02878	0.021573	0.0745228	0.0424386	-0.255564	-0.235431	-0.265506
YGL240W	DOC1	Processivity factor required for the ubiquitination activity of the anaphase promoting complex (APC), mediates the activity of the APC by contributing to substrate recognition; involved in cyclin proteolysis	0.0669578	0.0744516	0.161737	0.714865	0.545902	0.414129	0.208374	0.125977	0.200731
YGL241W	KAP114	Karyopherin, responsible for nuclear import of Spt15p, Sua7p, histones H2A and H2B, and Nap1p; amino terminus shows similarity to those of other importins, particularly Cse1p; localization is primarily nuclear	0.140964	0.00706186	0.006463	0.13931	0.12672	0.0331591	0.159617	0.187095	0.276722
YGL242C	YGL242C	Putative protein of unknown function; deletion mutant is viable	0.303142	0.175753	0.276793	0.290295	0.786667	0.766893	0.791764	0.607755	1.07271
YGL243W	TAD1	tRNA-specific adenosine deaminase, deaminates adenosine-37 to inosine in tRNA-Ala	0.303392	0.131952	0.618603	0.0703335	0.248984	0.271687	-0.0414036	-0.126484	0.0234009
YGL244W	RTF1	Subunit of the RNA polymerase II-associated Paf1 complex; directly or indirectly regulates DNA-binding properties of Spt15p and relative activities of different TATA elements; involved in telomere maintenance	0.0131592	-0.00260733	0.007987	-0.059973	-0.096324	0.00505005	-0.178914	-0.175633	-0.180948
YGL245W	GUS1	Glutamyl-tRNA synthetase (GluRS), forms a complex with methionyl-tRNA synthetase (Mes1p) and Arc1p; complex formation increases the catalytic efficiency of both tRNA synthetases and ensures their correct localization to the cytoplasm	0.0080216	0.0321705	-0.073863	-0.00043145	-0.041449	-0.0570938	-0.262898	-0.317584	-0.331777
YGL246C	RAI1	Nuclear protein with decapping endonuclease activity targeted toward mRNAs with unmethylated 7-methylguanosine cap structures; binds to and stabilizes the exoribonuclease Rat1p; required for pre-rRNA processing; homologous to human DOM3Z	0.0856606	0.0559719	0.0905905	-0.0248631	-0.029713	-0.0695909	0.0839285	0.0760027	0.0702909
YGL248W	PDE1	Low-affinity cyclic AMP phosphodiesterase, controls glucose and intracellular acidification-induced cAMP signaling, target of the cAMP-protein kinase A (PKA) pathway; glucose induces transcription and inhibits translation	0.0988251	0.00519792	-0.086769	0.158649	0.094842	0.107859	0.192322	0.101797	0.149114
YGL252C	RTG2	Sensor of mitochondrial dysfunction; regulates the subcellular location of Rtg1p and Rtg3p, transcriptional activators of the retrograde (RTG) and TOR pathways; Rtg2p is inhibited by the phosphorylated form of Mks1p	0.10708	-0.0447467	0.113828	0.0619051	0.103243	-0.038179	0.278394	0.184806	0.311611
YGL253W	HXK2	Hexokinase isoenzyme 2 that catalyzes phosphorylation of glucose in the cytosol; predominant hexokinase during growth on glucose; functions in the nucleus to repress expression of HXK1 and GLK1 and to induce expression of its own gene	0.001981	-0.00684321	0.0132359	-0.187473	-0.186005	-0.218523	-0.0270525	-0.0858844	-0.0265661
YGL254W	FZF1	Transcription factor involved in sulfite metabolism, sole identified regulatory target is SSU1, overexpression suppresses sulfite-sensitivity of many unrelated mutants due to hyperactivation of SSU1, contains five zinc fingers	-0.193271	-0.274915	-0.228798	-0.0188661	0.0632677	0.0335415	0.140479	0.145948	0.20847
YGL255W	ZRT1	High-affinity zinc transporter of the plasma membrane, responsible for the majority of zinc uptake; transcription is induced under low-zinc conditions by the Zap1p transcription factor	3.0527	2.86451	2.95843	-1.6352	-1.60633	-1.50289	-0.389061	-0.488467	-0.283312
YGL256W	ADH4	Alcohol dehydrogenase isoenzyme type IV, dimeric enzyme demonstrated to be zinc-dependent despite sequence similarity to iron-activated alcohol dehydrogenases; transcription is induced in response to zinc deficiency	3.89521	3.93293	3.89852	-0.0762391	0.126741	0.0784284	-0.897091	-1.26574	-1.226
YGR001C	YGR001C	Putative protein of unknown function with similarity to methyltransferase family members; green fluorescent protein (GFP)-fusion protein localizes to the cytoplasm; required for replication of Brome mosaic virus in S. cerevisiae	0.0108255	0.0976887	0.0837834	-0.278002	-0.227778	-0.230795	0.0587505	0.0937187	0.124453
YGR002C	SWC4	Component of the Swr1p complex that incorporates Htz1p into chromatin; component of the NuA4 histone acetyltransferase complex	-0.0517769	-0.126529	-0.067141	-0.0404831	-0.116346	-0.0767403	0.0568365	0.0191024	0.018205
YGR003W	CUL3	Ubiquitin-protein ligase, member of the cullin family with similarity to Cdc53p and human CUL3; required for ubiquitin-dependent degredation of the RNA Polymerase II subunit RPO21	0.212153	0.159802	0.26274	0.136899	0.175587	0.178423	0.230636	0.248224	0.234184
YGR005C	TFG2	TFIIF (Transcription Factor II) middle subunit; involved in both transcription initiation and elongation of RNA polymerase II; homologous to human RAP30	0.0485154	0.0502286	0.0690515	0.0737805	0.0725729	0.0165805	0.308095	0.23344	0.285286
[truncated: 2,616 more rows]
