# Supplementary material for: Quantitative proteomic analysis reveals posttranslational responses to aneuploidy in yeast
Source: eLife journal article supplement (doi:10.7554/elife.03023), 2014-07-29
Supplement: supp [file elife-03023-supp-v1.zip › elife_poa_e03023_Figure_5_source_data_1.xlsx]

## Sheet: Sheet1
COMPLEX	Subunits		SILAC			TMT			TMT-ubp6∆	SILAC	TMT	TMT-ubp6∆
box C/D snoRNP	YDL014W	NOP1		YDL014W	NOP1		YDL014W	NOP1		0.200082	0.0833333	-0.0484987
	YLR197W	NOP56	0.604277	YLR197W	NOP56	0.53	YLR197W	NOP56	0.470828
	YOR310C	NOP58	-0.023539	YOR310C	NOP58	-0.24	YOR310C	NOP58	-0.235954
	YEL026W	SNU13	0.019509	YEL026W	SNU13	-0.04	YEL026W	SNU13	-0.38037
ARP2/3	YBR234C	ARC40	0.218011	YBR234C	ARC40	0.17	YBR234C	ARC40	0.479191	0.463092	0.298333	0.6248
	YDL029W	ARP2		YDL029W	ARP2		YDL029W	ARP2
	YIL062C	ARC15	0.351688	YIL062C	ARC15	-1.42	YIL062C	ARC15	0.273018
	YJR065C	ARP3	0.796643	YJR065C	ARP3	1.04	YJR065C	ARP3	0.951478
	YKL013C	ARC19		YKL013C	ARC19	0.47	YKL013C	ARC19
	YLR370C	ARC18		YLR370C	ARC18	0.78
	YNR035C	ARC35	0.486026	YNR035C	ARC35	0.75	YNR035C	ARC35	0.795515
Cdc73p/Paf1p complex	YAL021C	CCR4	0.843608							0.553432	0.3625	0.416736
	YBR279W	PAF1	0.303235	YBR279W	PAF1	0.09	YBR279W	PAF1	0.150294
	YDR138W	HPR1
	YGL244W	RTF1		YGL244W	RTF1		YGL244W	RTF1
	YLR418C	CDC73	1.04003	YLR418C	CDC73	0.63	YLR418C	CDC73	0.864675
	YOL145C	CTR9	-0.020651	YOL145C	CTR9	0.06	YOL145C	CTR9	0.236547
	YOR123C	LEO1	0.60094	YOR123C	LEO1	0.67	YOR123C	LEO1	0.415429
CCR4-NOT core	YAL021C	CCR4	0.843608	YAL021C	CCR4	0.95	YAL021C	CCR4	0.966646	0.538754	0.453333	0.509575
	YCR093W	CDC39		YCR093W	CDC39		YCR093W	CDC39
	YDL165W	CDC36		YDL165W	CDC36		YDL165W	CDC36
	YER068W	MOT2	0.216795	YER068W	MOT2	0.07	YER068W	MOT2	0.26601
	YGR134W	CAF130		YGR134W	CAF130		YGR134W	CAF130
	YIL038C	NOT3	0.358988	YIL038C	NOT3	0.13	YIL038C	NOT3	0.446658
	YNL288W	CAF40	0.535714	YNL288W	CAF40	0.37	YNL288W	CAF40	0.26933
	YNR052C	POP2	0.386484	YNR052C	POP2	0.3	YNR052C	POP2	0.408282
	YPR072W	NOT5	0.890933	YPR072W	NOT5	0.9	YPR072W	NOT5	0.700525
commitment complex	YBR119W	MUD1	-0.0941986	YBR119W	MUD1	-0.17	YBR119W	MUD1	0.240787	0.484567	0.526364	0.460154
	YDL087C	LUC7		YDL087C	LUC7		YDL087C	LUC7
	YDR235W	PRP42
	YDR240C	SNU56		YDR240C	SNU56		YDR240C	SNU56
	YER029C	SMB1	0.675214	YER029C	SMB1	0.86	YER029C	SMB1	0.728503
	YFL017W-A	SMX2
	YGR013W	SNU71		YGR013W	SNU71		YGR013W	SNU71
	YGR074W	SMD1		YGR074W	SMD1		YGR074W	SMD1
	YHR086W	NAM8	0.561367	YHR086W	NAM8	0.81	YHR086W	NAM8
	YIL061C	SNP1	-0.02613	YIL061C	SNP1	0.21	YIL061C	SNP1	0.186749
	YKL012W	PRP40	0.609374	YKL012W	PRP40	0.91	YKL012W	PRP40	0.750806
	YKL074C	MUD2	0.106396	YKL074C	MUD2	0.48	YKL074C	MUD2	0.352574
	YLR116W	MSL5	0.973048	YLR116W	MSL5	0.77	YLR116W	MSL5	0.908728
	YLR147C	SMD3	0.672891	YLR147C	SMD3	0.45	YLR147C	SMD3	0.0977756
	YLR275W	SMD2	0.553821	YLR275W	SMD2	0.26	YLR275W	SMD2	0.188279
	YLR298C	YHC1	0.139155	YLR298C	YHC1		YLR298C	YHC1	0.318194
	YML046W	PRP39	0.883732	YML046W	PRP39		YML046W	PRP39	0.928669
	YMR125W	STO1	0.805498	YMR125W	STO1	0.7	YMR125W	STO1	0.867939
	YOR159C	SME1
	YPL178W	CBC2	0.439211	YPL178W	CBC2	0.51	YPL178W	CBC2	0.184416
	YPR182W	SMX3					YPR182W	SMX3	0.22859
COPI	YDL145C	COP1		YDL145C	COP1		YDL145C	COP1
	YDR238C	SEC26		YDR238C	SEC26		YDR238C	SEC26
	YER122C	GLO3	0.805974	YER122C	GLO3	0.88	YER122C	GLO3	0.864494
	YFR051C	RET2		YFR051C	RET2		YFR051C	RET2
	YGL137W	SEC27		YGL137W	SEC27		YGL137W	SEC27
	YIL076W	SEC28	0.482603	YIL076W	SEC28	0.4	YIL076W	SEC28	0.333357
	YNL287W	SEC21	0.795888	YNL287W	SEC21	0.88	YNL287W	SEC21	0.634956
	YPL010W	RET3	0.568763	YPL010W	RET3	0.07	YPL010W	RET3	0.236005
DNA replication factor C	YBR087W	RFC5	0.449496	YBR087W	RFC5	0.82	YBR087W	RFC5	0.754561	0.507949	0.464286	0.532332
	YCL016C	DCC1		YCL016C	DCC1
	YER173W	RAD24		YER173W	RAD24
	YHR191C	CTF8		YHR191C	CTF8	0.87
	YJR068W	RFC2	0.685297	YJR068W	RFC2	0.75	YJR068W	RFC2	0.661114
	YMR078C	CTF18	0.781323	YMR078C	CTF18	-0.14	YMR078C	CTF18	0.612221
	YNL290W	RFC3	0.173582	YNL290W	RFC3	0.29	YNL290W	RFC3	0.0625738
	YOL094C	RFC4	0.296463	YOL094C	RFC4	0.21	YOL094C	RFC4	0.365387
	YOR144C	ELG1	0.730068	YOR144C	ELG1		YOR144C	ELG1	0.547781
	YOR217W	RFC1	0.439413	YOR217W	RFC1	0.45	YOR217W	RFC1	0.722685
DNA-directed RNA polymerase I	YBR154C	RPB5	1.01138	YBR154C	RPB5	0.88				0.440079	0.2175	0.116157
	YDR156W	RPA14		YDR156W	RPA14		YDR156W	RPA14
	YHR143W-A	RPC10	0.41051	YHR143W-A	RPC10	0.12
	YJL148W	RPA34	0.821586	YJL148W	RPA34	0.68	YJL148W	RPA34	0.540918
	YJR063W	RPA12	0.681493	YJR063W	RPA12	0.34	YJR063W	RPA12	0.127654
	YNL113W	RPC19	0.529017	YNL113W	RPC19	0.01	YNL113W	RPC19	-0.191957
	YNL248C	RPA49	0.375894				YNL248C	RPA49	0.165468
	YOR210W	RPB10	0.014929	YOR210W	RPB10	-0.39
	YOR224C	RPB8	0.522525	YOR224C	RPB8	0.27
	YOR340C	RPA43	0.221351	YOR340C	RPA43	-0.02	YOR340C	RPA43	-0.0363075
	YOR341W	RPA190	-0.150944	YOR341W	RPA190	-0.37	YOR341W	RPA190	-0.293465
	YPR010C	RPA135	0.351554	YPR010C	RPA135	0.41	YPR010C	RPA135	0.392214
	YPR110C	RPC40	0.348681	YPR110C	RPC40	0.38	YPR110C	RPC40	0.22473
	YPR187W	RPO26	0.583042	YPR187W	RPO26	0.3
DNA-directed RNA polymerase II	YBR154C	RPB5	1.01138	YBR154C	RPB5	0.88	YBR154C	RPB5	0.929295	0.556067	0.351111	0.339476
	YDL140C	RPO21		YDL140C	RPO21		YDL140C	RPO21
	YDR404C	RPB7		YDR404C	RPB7		YDR404C	RPB7
	YGL070C	RPB9
	YHR143W-A	RPC10	0.41051	YHR143W-A	RPC10	0.12	YHR143W-A	RPC10	0.173552
	YIL021W	RPB3	0.576269	YIL021W	RPB3	0.56	YIL021W	RPB3	0.504585
	YJL140W	RPB4	0.653648	YJL140W	RPB4	0.53	YJL140W	RPB4	0.446921
	YOL005C	RPB11	0.625722	YOL005C	RPB11	0.3	YOL005C	RPB11	0.324242
	YOR151C	RPB2	0.606573	YOR151C	RPB2	0.59	YOR151C	RPB2	0.912315
	YOR210W	RPB10	0.014929	YOR210W	RPB10	-0.39	YOR210W	RPB10	-0.41526
	YOR224C	RPB8	0.522525	YOR224C	RPB8	0.27	YOR224C	RPB8	-0.0501575
	YPR187W	RPO26	0.583042	YPR187W	RPO26	0.3	YPR187W	RPO26	0.229796
DNA-directed RNA polymerase III	YBR154C	RPB5	1.01138							0.410367	0.25875	0.274334
	YDL150W	RPC53		YDL150W	RPC53		YDL150W	RPC53
	YDR045C	RPC11		YDR045C	RPC11		YDR045C	RPC11
	YHR143W-A	RPC10	0.41051
	YJL011C	RPC17	-0.003141	YJL011C	RPC17	0.22	YJL011C	RPC17	-0.152814
	YKL144C	RPC25	0.517494	YKL144C	RPC25	0.43	YKL144C	RPC25	0.472576
	YKR025W	RPC37	0.521006	YKR025W	RPC37	0.19	YKR025W	RPC37	0.486911
	YNL113W	RPC19	0.529017
	YNL151C	RPC31	0.376917	YNL151C	RPC31	0.25	YNL151C	RPC31	0.0435355
	YNR003C	RPC34	0.661108	YNR003C	RPC34	0.57	YNR003C	RPC34	0.564093
	YOR116C	RPO31	-0.004871	YOR116C	RPO31	-0.3	YOR116C	RPO31	-0.110967
	YOR207C	RET1	0.20294	YOR207C	RET1	0.06	YOR207C	RET1	0.358793
	YOR210W	RPB10	0.014929
	YOR224C	RPB8	0.522525
	YPR110C	RPC40	0.348681
	YPR187W	RPO26	0.583042
	YPR190C	RPC82	0.46396	YPR190C	RPC82	0.65	YPR190C	RPC82	0.532545
eIF3	YBR079C	RPG1	0.344634	YBR079C	RPG1	0.27	YBR079C	RPG1	0.381924	0.548508	0.41	0.403787
	YDR429C	TIF35		YDR429C	TIF35		YDR429C	TIF35
	YLR192C	HCR1	1.29704	YLR192C	HCR1	0.96	YLR192C	HCR1	1.01972
	YMR012W	CLU1	1.02913	YMR012W	CLU1	0.94	YMR012W	CLU1	0.012235
	YMR146C	TIF34	0.165444	YMR146C	TIF34	0.15	YMR146C	TIF34	0.442775
	YMR309C	NIP1	0.361377	YMR309C	NIP1	0.08	YMR309C	NIP1	0.520372
	YOR361C	PRT1	0.0934241	YOR361C	PRT1	0.06	YOR361C	PRT1	0.0457005
EKC/KEOPS protein complex	YGR262C	BUD32		YGR262C	BUD32		YGR262C	BUD32		0.558601	0.555	0.383563
	YJL184W	GON7	0.521493	YJL184W	GON7	0.69	YJL184W	GON7	0.18689
	YKR038C	KAE1	0.683946	YKR038C	KAE1	0.6	YKR038C	KAE1	0.530845
	YKR095W-A	PCC1	0.550502	YKR095W-A	PCC1	0.43	YKR095W-A	PCC1	0.223178
	YML036W	CGI121	0.478462	YML036W	CGI121	0.5	YML036W	CGI121	0.593341
F0/F1 ATP synthase (complex V)	Q0080	ATP8								0.362736	0.341	0.0687689
	Q0085	ATP6
	Q0130	OLI1
	YBL099W	ATP1	0.432611	YBL099W	ATP1	0.37	YBL099W	ATP1	0.457649
	YBR039W	ATP3	0.187173	YBR039W	ATP3	0.1	YBR039W	ATP3	0.164166
	YDL004W	ATP16		YDL004W	ATP16		YDL004W	ATP16
	YDL181W	INH1
	YDR298C	ATP5		YDR298C	ATP5		YDR298C	ATP5
	YDR322C-A	TIM11		YDR322C-A	TIM11		YDR322C-A	TIM11
	YDR377W	ATP17		YDR377W	ATP17		YDR377W	ATP17
	YJR121W	ATP2	0.803213	YJR121W	ATP2	0.38	YJR121W	ATP2	0.231234
	YKL016C	ATP7	0.955035	YKL016C	ATP7	0.7	YKL016C	ATP7	0.181398
	YLR295C	ATP14	-0.173824	YLR295C	ATP14	-0.34	YLR295C	ATP14	-0.775622
	YML081C-A	ATP18	0.952853	YML081C-A	ATP18	0.68	YML081C-A	ATP18	-0.054893
	YOL077W-A	ATP19		YOL077W-A	ATP19	1.12	YOL077W-A	ATP19	0.588064
	YPL078C	ATP4	0.0802615	YPL078C	ATP4	0.12	YPL078C	ATP4	0.142469
	YPL271W	ATP15	-0.117349	YPL271W	ATP15	0.01	YPL271W	ATP15	-0.163805
	YPR020W	ATP20	0.144652	YPR020W	ATP20	0.27	YPR020W	ATP20	-0.0829694
H+-transporting ATPase, vacuolar	YBR127C	VMA2	0.80306	YBR127C	VMA2	0.78	YBR127C	VMA2	0.731801	0.468845	0.375556	0.405712
	YDL185W	TFP1		YDL185W	TFP1		YDL185W	TFP1
	YEL027W	CUP5
	YEL051W	VMA8	0.498296	YEL051W	VMA8	0.17	YEL051W	VMA8	0.449782
	YGR020C	VMA7		YGR020C	VMA7		YGR020C	VMA7
	YHR026W	PPA1
	YHR039C-A	VMA10	0.469974	YHR039C-A	VMA10	0.32	YHR039C-A	VMA10	0.201265
	YKL080W	VMA5	0.761416	YKL080W	VMA5	0.73	YKL080W	VMA5	0.831739
	YLR447C	VMA6	0.633955	YLR447C	VMA6	0.58	YLR447C	VMA6	0.571419
	YOR270C	VPH1	-0.285739	YMR054W	STV1	0.31	YMR054W	STV1
	YOR332W	VMA4	-0.042341	YOR270C	VPH1	-0.38	YOR270C	VPH1	-0.366865
	YPL234C	TFP3		YOR332W	VMA4	-0.06	YOR332W	VMA4	-0.190023
	YPR036W	VMA13	0.912143	YPR036W	VMA13	0.93	YPR036W	VMA13	1.01658
Kornberg's mediator (SRB) complex	YBL093C	ROX3	0.209579	YBR193C	MED8	0.37	YBL093C	ROX3	0.112687	0.509677	0.617692	0.56568
	YBR193C	MED8	0.0480825				YBR193C	MED8	1.02355
	YBR253W	SRB6	0.484846	YBR253W	SRB6	0.46	YBR253W	SRB6	0.588762
	YCR081W	SRB8		YCR081W	SRB8		YCR081W	SRB8
	YDL005C	MED2		YDL005C	MED2		YDL005C	MED2
	YDR308C	SRB7		YDR308C	SRB7		YDR308C	SRB7
	YDR443C	SSN2		YDR443C	SSN2		YDR443C	SSN2
	YER022W	SRB4	0.623955	YER022W	SRB4	0.87	YER022W	SRB4	1.04578
	YGL025C	PGD1		YGL025C	PGD1		YGL025C	PGD1
	YGL127C	SOH1
	YGL151W	NUT1		YGL151W	NUT1		YGL151W	NUT1
	YGR104C	SRB5		YGR104C	SRB5
	YHR041C	SRB2	0.505585	YHR041C	SRB2	0.77	YHR041C	SRB2	0.555659
	YHR058C	MED6	0.401318	YHR058C	MED6	0.52	YHR058C	MED6	0.578637
	YLR071C	RGR1	0.900707	YLR071C	RGR1	0.77	YLR071C	RGR1	0.815355
	YMR112C	MED11	0.0886781	YMR112C	MED11		YMR112C	MED11	0.281676
	YNL025C	SSN8
	YNL236W	SIN4	1.30321	YNL236W	SIN4	0.98	YNL236W	SIN4	0.69425
	YNR010W	CSE2	-0.083128	YNR010W	CSE2	0.24	YNR010W	CSE2	-0.162509
	YOL051W	GAL11	0.453393	YOL051W	GAL11	0.51	YOL051W	GAL11	0.397426
	YOL135C	MED7	0.394131	YOL135C	MED7	0.3	YOL135C	MED7	0.359612
	YOR174W	MED4	0.749537	YOR174W	MED4	0.79	YOR174W	MED4	0.590435
	YPL042C	SSN3	0.729232				YPL042C	SSN3	0.754646
	YPR070W	MED1	0.872934	YPR070W	MED1	0.85	YPR070W	MED1	0.898302
	YPR168W	NUT2	0.472782	YPR168W	NUT2	0.6	YPR168W	NUT2	0.516616
MIND Complex (kinetochore)	YAL034W-A	MTW1	0.939627	YAL034W-A	MTW1	0.82	YAL034W-A	MTW1	0.895512	0.56893	0.08	0.5288
	YIR010W	DSN1	0.246331	YIR010W	DSN1	-0.99	YIR010W	DSN1	-0.125607
	YJR112W	NNF1	0.474923	YJR112W	NNF1	0.41	YJR112W	NNF1
	YPL233W	NSL1	0.61484	YPL233W	NSL1		YPL233W	NSL1	0.816496
mRNA cleavage and polyadenylation specificity factor	YAL043C	PTA1	0.601099	YAL043C	PTA1	0.6	YAL043C	PTA1	0.544762	0.627867	0.560909	0.428368
	YDR195W	REF2		YDR195W	REF2		YDR195W	REF2
	YDR301W	CFT1		YDR301W	CFT1		YDR301W	CFT1
	YER133W	GLC7	0.765554
	YGR156W	PTI1		YGR156W	PTI1		YGR156W	PTI1
	YJR093C	FIP1	0.167762	YJR093C	FIP1	0.63	YJR093C	FIP1	0.25512
	YKL018W	SWD2	0.987515	YKL018W	SWD2	0.16	YKL018W	SWD2	0.888438
	YKL059C	MPE1	0.824995	YKL059C	MPE1	0.83	YKL059C	MPE1	0.553423
	YKR002W	PAP1	0.659026	YKR002W	PAP1	0.74	YKR002W	PAP1	0.81122
	YLR115W	CFT2	0.584352	YLR115W	CFT2	0.85	YLR115W	CFT2	0.639125
	YLR277C	YSH1	0.77767	YLR277C	YSH1	0.94	YLR277C	YSH1	0.920389
	YNL222W	SSU72	0.270802	YNL222W	SSU72	0.77	YNL222W	SSU72	-0.0835911
	YNL317W	PFS2	0.797048	YNL317W	PFS2	0.52	YNL317W	PFS2	0.274077
	YOR179C	SYC1		YOR179C	SYC1	0.3	YOR179C	SYC1	-0.155751
	YPR107C	YTH1	0.470713	YPR107C	YTH1	-0.17	YPR107C	YTH1	0.064842
NuA4 histone acetyltransferase complex	YDR359C	EAF1		YDR359C	EAF1		YDR359C	EAF1		0.715384	0.615	0.646018
	YEL018W	EAF5	0.699334	YEL018W	EAF5	0.51	YEL018W	EAF5	1.00466
	YFL024C	EPL1		YFL024C	EPL1		YFL024C	EPL1
	YFL039C	ACT1
	YGR002C	SWC4		YGR002C	SWC4		YGR002C	SWC4
	YHR090C	YNG2					YHR090C	YNG2	0.23679
	YHR099W	TRA1	0.776426	YHR099W	TRA1	0.91	YHR099W	TRA1	0.931053
	YJL081C	ARP4	0.915892
	YJR082C	EAF6	0.433565
	YNL107W	YAF9	0.672298	YNL107W	YAF9	0.82	YNL107W	YAF9	0.298986
	YNL136W	EAF7	0.541134	YNL136W	EAF7	0.34	YNL136W	EAF7	0.445481
	YOR244W	ESA1	1.05706	YOR244W	ESA1	0.55	YOR244W	ESA1	1.14848
	YPR023C	EAF3	0.627371	YPR023C	EAF3	0.56	YPR023C	EAF3	0.456678
Nuclear exosome complex	YCR035C	RRP43		YCR035C	RRP43		YCR035C	RRP43		0.37373	0.365	0.288503
	YDL111C	RRP42		YDL111C	RRP42		YDL111C	RRP42
	YDR280W	RRP45		YDR280W	RRP45		YDR280W	RRP45
	YGR095C	RRP46		YGR095C	RRP46		YGR095C	RRP46
	YGR158C	MTR3		YGR158C	MTR3		YGR158C	MTR3
	YGR195W	SKI6		YGR195W	SKI6		YGR195W	SKI6
	YHR069C	RRP4	0.323117	YHR069C	RRP4	0.73	YHR069C	RRP4	0.550127
	YHR081W	LRP1	0.15318	YHR081W	LRP1	0.35	YHR081W	LRP1	0.172827
	YNL232W	CSL4	0.885328	YNL232W	CSL4	0.75	YNL232W	CSL4	0.121486
	YOL021C	DIS3	0.236647	YOL021C	DIS3	0.04	YOL021C	DIS3	0.264395
	YOL142W	RRP40	0.121605	YOL142W	RRP40	0	YOL142W	RRP40	0.0690925
	YOR001W	RRP6	0.522502	YOR001W	RRP6	0.32	YOR001W	RRP6	0.553089
nucleolar ribonuclease P complex	YAL033W	POP5	0.329547	YAL033W	POP5	0	YAL033W	POP5	0.193971	0.392979	0.36	0.312209
	YBL018C	POP8	0.659887	YBL018C	POP8	0.26	YBL018C	POP8	0.390375
	YBR167C	POP7	0.185146	YBR167C	POP7	0.32	YBR167C	POP7	0.465675
	YBR257W	POP4	0.261375	YBR257W	POP4	0.09	YBR257W	POP4	0.236047
	YGR030C	POP6		YGR030C	POP6		YGR030C	POP6
	YHR062C	RPP1	0.718849	YHR062C	RPP1	1.01	YHR062C	RPP1	0.887441
	YIR015W	RPR2
	YNL221C	POP1	0.185638	YNL221C	POP1	0.48	YNL221C	POP1	0.342892
	YNL282W	POP3	0.41041				YNL282W	POP3	-0.330933
Nucleosomal protein complex	YBL002W	HTB2	0.051145	YBL002W	HTB2	0.1	YBL002W	HTB2	0.116032	0.0045535	-0.233333	0.187653
	YBL003C	HTA2	0.161974	YBL003C	HTA2	0.1	YBL003C	HTA2	-0.11345
	YBR009C	HHF1	0.073901	YBR009C	HHF1	0.23	YBR009C	HHF1	0.328163
	YBR010W	HHT1		YBR010W	HHT1	-0.26	YBR010W	HHT1	-0.141832
	YDR224C	HTB1		YDR224C	HTB1		YDR224C	HTB1
	YDR225W	HTA1		YDR225W	HTA1		YDR225W	HTA1
	YNL030W	HHF2	-0.268806	YNL030W	HHF2	-0.57	YNL030W	HHF2	1.21753
	YNL031C	HHT2		YNL031C	HHT2	-1	YNL031C	HHT2	-0.280528
nucleotide-excision repair factor 4 complex	YBR114W	RAD16	1.14878	YBR114W	RAD16	0.55	YBR114W	RAD16		0.489054	0.563333	0.291309
	YJR052W	RAD7	0.483725	YJR052W	RAD7	0.78	YKL112W	ABF1	-0.0238633
	YKL112W	ABF1	0.0285305	YKL112W	ABF1	0.36	YJR052W	RAD7	0.606482
	YPL046C	ELC1	0.295177	YPL046C	ELC1		YPL046C	ELC1
oligosaccharyl transferase complex	YDL232W	OST4								0.514935	0.515	0.499976
	YEL002C	WBP1	0.611909	YEL002C	WBP1	0.58	YEL002C	WBP1	0.654294
	YGL022W	STT3		YGL022W	STT3		YGL022W	STT3
	YGL226C-A	OST5		YGL226C-A	OST5		YGL226C-A	OST5
	YJL002C	OST1	0.982752	YJL002C	OST1	0.98	YJL002C	OST1	1.04451
	YML019W	OST6	0.689256	YML019W	OST6	0.83	YML019W	OST6	0.661882
	YMR149W	SWP1	0.472303	YMR149W	SWP1	0.54	YMR149W	SWP1	0.445601
	YOR085W	OST3	0.450451	YOR085W	OST3	0.23	YOR085W	OST3	0.426413
	YOR103C	OST2	-0.117063	YOR103C	OST2	-0.07	YOR103C	OST2	-0.232847
Origin recognition complex	YBR060C	ORC2	0.42121	YBR060C	ORC2	0.16	YBR060C	ORC2	0.0454405	0.514489	0.426667	0.463048
	YHR118C	ORC6	0.413366	YHR118C	ORC6	0.55	YHR118C	ORC6	0.0874342
	YLL004W	ORC3	0.303628	YLL004W	ORC3	0.01	YLL004W	ORC3	0.746961
	YML065W	ORC1	0.698882	YML065W	ORC1	0.29	YML065W	ORC1	0.631712
	YNL261W	ORC5		YNL261W	ORC5	0.88	YNL261W	ORC5	0.803694
	YPR162C	ORC4	0.735361	YPR162C	ORC4	0.67	YPR162C	ORC4
prefoldin complex	YEL003W	GIM4	0.428578	YEL003W	GIM4	0.2	YEL003W	GIM4	0.157023	0.532255	0.298	0.178579
	YGR078C	PAC10		YGR078C	PAC10		YGR078C	PAC10
	YJL179W	PFD1	0.142381	YJL179W	PFD1	0.15	YJL179W	PFD1	-0.0688512
	YLR200W	YKE2	0.932714	YLR200W	YKE2	0.24	YLR200W	YKE2	0.318799
	YML094W	GIM5	0.633242	YML094W	GIM5	0.86	YML094W	GIM5	0.727797
	YNL153C	GIM3	0.524361	YNL153C	GIM3	0.04	YNL153C	GIM3	-0.241873
Prp19-associated complex	YBR188C	NTC20		YBR188C	NTC20	-0.03	YBR188C	NTC20	0.654506	0.440274	0.4025	0.42318
	YDR416W	SYF1		YDR416W	SYF1		YDR416W	SYF1
	YGR129W	SYF2		YGR129W	SYF2		YGR129W	SYF2
	YJR050W	ISY1	0.311948	YJR050W	ISY1	0.4	YJR050W	ISY1	0.240693
	YLL036C	PRP19	0.961738	YLL036C	PRP19	0.92	YLL036C	PRP19	0.711897
	YLR117C	CLF1	0.535509	YLR117C	CLF1	0.32	YLR117C	CLF1
	YMR213W	CEF1	0.152101	YMR213W	CEF1		YMR213W	CEF1	0.322319
	YPR101W	SNT309	0.240074				YPR101W	SNT309	0.186484
Rpd3L complex	YAL013W	DEP1	0.43655	YAL013W	DEP1	0.21	YAL013W	DEP1	-0.0167127	0.538168	0.411111	0.451255
	YBR095C	RXT2	0.560006	YBR095C	RXT2	0.45	YBR095C	RXT2	0.282568
	YDL076C	RXT3		YDL076C	RXT3		YDL076C	RXT3
	YDR207C	UME6
	YIL084C	SDS3	0.353565	YIL084C	SDS3	0.27	YIL084C	SDS3
	YKL185W	ASH1		YKL185W	ASH1
	YMR263W	SAP30	0.333798	YMR263W	SAP30	0.34	YMR263W	SAP30	0.417527
	YNL097C	PHO23	0.740998	YNL097C	PHO23	-0.01	YNL097C	PHO23	0.109897
	YNL330C	RPD3	0.742738	YNL330C	RPD3	0.61	YNL330C	RPD3	0.458636
	YOL004W	SIN3	0.530787	YOL004W	SIN3	0.36	YOL004W	SIN3	0.760545
	YPL139C	UME1	0.662724	YPL139C	UME1	0.63	YPL139C	UME1	0.853682
	YPL181W	CTI6	0.482342	YPL181W	CTI6	0.84	YPL181W	CTI6	0.743901
RSC complex	YBL006C	LDB7	0.173001				YBL006C	LDB7	0.308527	0.452343	0.4125	0.301598
	YCR020W-B	HTL1
	YCR052W	RSC6		YCR052W	RSC6		YCR052W	RSC6
	YDR303C	RSC3		YDR303C	RSC3		YDR303C	RSC3
	YFR037C	RSC8		YFR037C	RSC8		YFR037C	RSC8
	YGR056W	RSC1		YGR056W	RSC1		YGR056W	RSC1
	YGR275W	RTT102
	YHR056C	RSC30	0.450634	YHR056C	RSC30	0.47	YHR056C	RSC30	0.267089
	YIL126W	STH1	0.380533	YIL126W	STH1	0.49	YIL126W	STH1	0.382574
	YKR008W	RSC4	0.488156	YKR008W	RSC4	0.73	YKR008W	RSC4	0.482904
	YLR033W	RSC58	0.259094	YLR033W	RSC58	0.19	YLR033W	RSC58	0.285675
	YLR321C	SFH1	0.178706	YLR321C	SFH1	0.17	YLR321C	SFH1	0.0903447
	YLR357W	RSC2	0.368054	YLR357W	RSC2	0.53	YLR357W	RSC2	0.0774009
	YML127W	RSC9	0.449619	YML127W	RSC9	0.38	YML127W	RSC9	0.340247
SWI/SNF complex, RSC complex	YMR033W	ARP9	0.841557
	YMR091C	NPL6	0.400436	YMR091C	NPL6	0.34	YMR091C	NPL6	0.479623
SWI/SNF complex, RSC complex	YPR034W	ARP7	0.985983
Set3p complex	YBR103W	SIF2	1.12908	YBR103W	SIF2	0.82	YBR103W	SIF2	0.726583	0.611294	0.445	0.524758
	YCR033W	SNT1		YCR033W	SNT1		YCR033W	SNT1
	YDR155C	CPR1		YDR155C	CPR1		YDR155C	CPR1
	YGL194C	HOS2					YGL194C	HOS2
	YIL112W	HOS4	0.323243	YIL112W	HOS4		YIL112W	HOS4	0.53698
	YKR029C	SET3	0.429863	YKR029C	SET3	0.07	YKR029C	SET3	0.223655
	YOL068C	HST1	0.562988	YOL068C	HST1		YOL068C	HST1	0.611813
smc5p-Smc6p complex	YDL105W	NSE4		YDL105W	NSE4		YDL105W	NSE4		-0.206809	0.12	0.367537
	YDR288W	NSE3		YDR288W	NSE3		YDR288W	NSE3
	YEL019C	MMS21	-0.634708
	YER038C	KRE29
	YLR007W	NSE1
	YLR383W	SMC6	-0.268664	YLR383W	SMC6	0.01	YLR383W	SMC6	0.357168
	YML023C	NSE5
	YOL034W	SMC5	0.282945	YOL034W	SMC5	0.23	YOL034W	SMC5	0.377905
SWI/SNF complex	YBR289W	SNF5	0.892994	YBR289W	SNF5	0.46	YBR289W	SNF5	1.22033	0.612768	0.411667	0.502636
	YDR073W	SNF11
	YFL049W	SWP82		YFL049W	SWP82		YFL049W	SWP82
	YGR275W	RTT102		YGR275W	RTT102		YGR275W	RTT102
	YHL025W	SNF6	0.0432066	YHL025W	SNF6	0.15	YHL025W	SNF6	0.129917
	YJL176C	SWI3	0.365197	YJL176C	SWI3	0.41	YJL176C	SWI3	0.140857
RSC complex	YMR033W	ARP9	0.841557	YMR033W	ARP9		YMR033W	ARP9
	YNR023W	SNF12	0.669298	YNR023W	SNF12	0.4	YNR023W	SNF12	0.214432
	YOR290C	SNF2	0.565943	YOR290C	SNF2	0.45	YOR290C	SNF2	0.715796
	YPL016W	SWI1	0.312103	YPL016W	SWI1	0.6	YPL016W	SWI1	0.594491
	YPL129W	TAF14	0.838633
RSC complex	YPR034W	ARP7	0.985983	YPR034W	ARP7		YPR034W	ARP7
TRAPP complex	YBR254C	TRS20								0.536609	0.683333	0.972987
	YDR108W	GSG1		YDR108W	GSG1		YDR108W	GSG1
	YDR246W	TRS23		YDR246W	TRS23		YDR246W	TRS23
	YDR407C	TRS120		YDR407C	TRS120		YDR407C	TRS120
	YDR472W	TRS31		YDR472W	TRS31		YDR472W	TRS31
	YGR166W	KRE11		YGR166W	KRE11		YGR166W	KRE11
	YKR068C	BET3	0.330532	YKR068C	BET3	0.61	YKR068C	BET3	0.435219
	YML077W	BET5
	YMR218C	TRS130	0.742686	YMR218C	TRS130	0.75	YMR218C	TRS130	0.773347
	YOR115C	TRS33		YOR115C	TRS33	0.69	YOR115C	TRS33	1.7104
LSM Complex/ U6 snRNP complex	YBL026W	LSM2	0.175752	YBL026W	LSM2	0.18	YBL026W	LSM2	0.230156	0.351656	0.335	0.258287
	YDR378C	LSM6		YDR378C	LSM6		YDR378C	LSM6
	YER112W	LSM4	0.291251	YER112W	LSM4	0.51	YER112W	LSM4	0.455565
	YER146W	LSM5	0.307062
	YJR022W	LSM8	0.269325	YJR022W	LSM8	0.58	YJR022W	LSM8	0.349158
	YLR438C-A	LSM3					YLR438C-A	LSM3	-0.126903
	YNL147W	LSM7	0.714888	YNL147W	LSM7	0.07	YNL147W	LSM7	0.383462
DASH complex	YBR233W-A	DAD3	0.474455	YBR233W-A	DAD3	0.22	YBR233W-A	DAD3	0.303006	0.393177	0.23	0.496387
	YDR016C	DAD1		YDR016C	DAD1		YDR016C	DAD1
	YDR201W	SPC19		YDR201W	SPC19		YDR201W	SPC19
	YDR320C-A	DAD4		YDR320C-A	DAD4		YDR320C-A	DAD4
	YGL061C	DUO1		YGL061C	DUO1		YGL061C	DUO1
	YGR113W	DAM1		YGR113W	DAM1		YGR113W	DAM1
	YKL052C	ASK1	0.486845	YKL052C	ASK1	0.66	YKL052C	ASK1
	YKL138C-A	HSK3		YKL138C-A	HSK3
	YKR037C	SPC34	0.21823	YKR037C	SPC34	0.49	YKR037C	SPC34	0.428549
	YKR083C	DAD2		YKR083C	DAD2	-0.45	YKR083C	DAD2	0.757607
TRAMP complex (Air1p)	YIL079C	AIR1	0.323618	YIL079C	AIR1	0.33	YIL079C	AIR1		0.67997	0.666667	0.727094
	YDL175C	AIR2		YDL175C	AIR2		YDL175C	AIR2
	YJL050W	MTR4	1.36042	YJL050W	MTR4	1.11	YJL050W	MTR4	1.0047
	YOL115W	PAP2	0.355874	YOL115W	PAP2	0.56	YOL115W	PAP2	0.449485
COMPASS complex	YAR003W						YAR003W	SWD1	0.345053	0.678332	0.62	0.762233
	YBR175W			YBR175W	SWD3	0.52	YBR175W	SWD3	1.03158
	YBR258C	SHG1	0.842983	YBR258C	SHG1	0.55
	YDR469W	SDC1		YDR469W	SDC1		YDR469W	SDC1
	YHR119W	SET1	0.369486	YHR119W	SET1	0.53	YHR119W	SET1	0.648777
	YLR015W	BRE2	0.410794	YLR015W	BRE2	0.2	YLR015W	BRE2	0.69114
	YPL138C	SPP1	1.09006	YPL138C	SPP1	1.3	YPL138C	SPP1	1.09462
Sec62p/Sec63p complex	YBR171W	SEC66	-0.156008	YBR171W	SEC66	-0.09	YBR171W	SEC66	-0.00844075	0.595289	0.5775	0.533796
	YLR292C	SEC72	0.534724	YLR292C	SEC72	0.54	YLR292C	SEC72	0.361359
	YOR254C	SEC63	0.821668	YOR254C	SEC63	0.76	YOR254C	SEC63	0.688435
	YPL094C	SEC62	1.18077	YPL094C	SEC62	1.1	YPL094C	SEC62	1.09383
19/22S regulator	YDL007W	RPT2		YDL007W	RPT2		YDL007W	RPT2		0.849891	0.790909	0.742725
	YDL097C	RPN6		YDL097C	RPN6		YDL097C	RPN6
	YDL147W	RPN5		YDL147W	RPN5		YDL147W	RPN5
	YDR363W-A	SEM1		YDR363W-A	SEM1		YDR363W-A	SEM1
	YDR394W	RPT3		YDR394W	RPT3		YDR394W	RPT3
	YDR427W	RPN9		YDR427W	RPN9		YDR427W	RPN9
	YER021W	RPN3	0.51359	YER021W	RPN3	0.67	YER021W	RPN3	0.475492
	YFR004W	RPN11		YFR004W	RPN11		YFR004W	RPN11
	YFR010W	UBP6		YFR010W	UBP6
	YFR052W	RPN12		YFR052W	RPN12		YFR052W	RPN12
	YGL048C	RPT6		YGL048C	RPT6		YGL048C	RPT6
	YGR232W	NAS6		YGR232W	NAS6		YGR232W	NAS6
	YHL030W	ECM29	1.54102	YHL030W	ECM29	1.07	YHL030W	ECM29	1.18212
	YHR027C	RPN1	1.26911	YHR027C	RPN1	1.24	YHR027C	RPN1	1.11833
	YHR200W	RPN10	0.910612	YHR200W	RPN10	1.13	YHR200W	RPN10	0.931408
	YIL075C	RPN2	0.751649	YIL075C	RPN2	0.68	YIL075C	RPN2	0.801881
	YKL145W	RPT1	0.307419	YKL145W	RPT1	0.5	YKL145W	RPT1	0.304231
	YLR421C	RPN13	0.973038	YLR421C	RPN13	0.63	YLR421C	RPN13	0.736366
	YOR117W	RPT5	0.876374	YOR117W	RPT5	0.76	YOR117W	RPT5	0.647615
	YOR259C	RPT4	0.932004	YOR259C	RPT4	1.03	YOR259C	RPT4	0.888305
	YOR261C	RPN8	0.572849	YOR261C	RPN8	0.29	YOR261C	RPN8	0.421788
	YPR108W	RPN7	0.701126	YPR108W	RPN7	0.7	YPR108W	RPN7	0.66243
20S proteasome	YBL041W	PRE7	0.707418	YBL041W	PRE7	0.8	YBL041W	PRE7	0.632433	0.698426	0.677	0.582254
	YER012W	PRE1	0.976294	YER012W	PRE1	0.87	YER012W	PRE1	0.675255
	YER094C	PUP3	0.720514	YER094C	PUP3	0.93	YER094C	PUP3	0.739953
	YFR050C	PRE4		YFR050C	PRE4		YFR050C	PRE4
	YGL011C	SCL1		YGL011C	SCL1		YGL011C	SCL1
	YGR135W	PRE9		YGR135W	PRE9		YGR135W	PRE9
	YGR253C	PUP2		YGR253C	PUP2		YGR253C	PUP2
	YJL001W	PRE3	0.794768	YJL001W	PRE3	0.65	YJL001W	PRE3	0.617577
	YML092C	PRE8	0.867572	YML092C	PRE8	0.88	YML092C	PRE8	0.825119
	YMR314W	PRE5	0.771777	YMR314W	PRE5	0.84	YMR314W	PRE5	0.784099
	YOL038W	PRE6	0.642941	YOL038W	PRE6	0.57	YOL038W	PRE6	0.478311
	YOR157C	PUP1	0.421809	YOR157C	PUP1	0.33	YOR157C	PUP1	0.179058
	YOR362C	PRE10	0.749108	YOR362C	PRE10	0.6	YOR362C	PRE10	0.484114
	YPR103W	PRE2	0.33206	YPR103W	PRE2	0.3	YPR103W	PRE2	0.406623
actin cytoskeleton-regulatory complex	YBL007C	SLA1	1.12731	YBL007C	SLA1	1.1	YBL007C	SLA1	1.01721	0.855146	0.883333	0.57853
	YIR006C	PAN1	0.368155	YIR006C	PAN1	0.6	YIR006C	PAN1	0.444679
	YNL084C	END3	1.06997	YNL084C	END3	0.95	YNL084C	END3	0.273706
alpha DNA polymerase:primase complex	YBL035C	POL12	0.932733	YBL035C	POL12	0.73	YBL035C	POL12	0.69542	0.666265	0.5325	0.522804
	YIR008C	PRI1	0.930999	YIR008C	PRI1	0.84	YIR008C	PRI1	1.04108
	YKL045W	PRI2	0.476735	YKL045W	PRI2	0.43	YKL045W	PRI2	0.38129
	YNL102W	POL1	0.324591	YNL102W	POL1	0.13	YNL102W	POL1	-0.0265709
alpha-1,6-mannosyltransferase complex	YDR245W	MNN10		YDR245W	MNN10		YDR245W	MNN10		0.655	0.678	0.640253
	YEL036C	ANP1	0.397664	YEL036C	ANP1	0.52	YEL036C	ANP1	0.559548
	YJL183W	MNN11	0.782141	YJL183W	MNN11	0.86	YJL183W	MNN11	0.720979
	YJR075W	HOC1	0.688138	YJR075W	HOC1	0.61	YJR075W	HOC1	0.564234
	YML115C	VAN1	0.531963	YML115C	VAN1	0.57	YML115C	VAN1	0.560866
	YPL050C	MNN9	0.875093	YPL050C	MNN9	0.83	YPL050C	MNN9	0.795639
trehalose-phosphate synthase complex	YBR126C	TPS1	0.983743	YBR126C	TPS1	1.27	YBR126C	TPS1	1.14769	1.758	1.47667	1.60322
	YDR074W	TPS2		YDR074W	TPS2		YDR074W	TPS2
	YML100W	TSL1	2.96455	YML100W	TSL1	2.04	YML100W	TSL1	2.32302
	YMR261C	TPS3	1.32571	YMR261C	TPS3	1.12	YMR261C	TPS3	1.33896
AP-1 adaptor complex	YHL019C	APM2	0.788974	YHL019C	APM2	2.01	YHL019C	APM2	0.769476	0.706413	0.651111	0.771595
	YKL135C	APL2	0.51252	YKL135C	APL2	0.18	YKL135C	APL2	0.647018
	YLR170C	APS1	0.324317	YLR170C	APS1		YLR170C	APS1
	YPL259C	APM1	0.76883	YPL259C	APM1	0.73	YPL259C	APM1	0.749786
	YPR029C	APL4	0.815144	YPR029C	APL4	0.71	YPR029C	APL4	0.929442
	YBL037W	APL3	0.805584	YBL037W	APL3	-0.04	YBL037W	APL3	0.776899
	YJR005W	APL1	0.806294	YJR005W	APL1	0.55	YJR005W	APL1	0.55449
	YOL062C	APM4	0.959068	YOL062C	APM4	0.65	YOL062C	APM4	1.07551
	YBR288C	APM3	0.674342	YBR288C	APM3	0.72	YBR288C	APM3	0.975191
	YGR261C	APL6		YGR261C	APL6		YGR261C	APL6
	YJL024C	APS3	0.96168				YJL024C	APS3
	YPL195W	APL5	0.353789	YPL195W	APL5	0.35	YPL195W	APL5	0.466551
calcineurin complex	YKL190W	CNB1	0.856855				YKL190W	CNB1	0.809743	0.946172	0.78	0.956686
	YLR433C	CNA1	1.13838	YLR433C	CNA1	1.06	YLR433C	CNA1	1.13291
	YML057W	CMP2	0.843282	YML057W	CMP2	0.5	YML057W	CMP2	0.927409
cAMP-dependent protein kinase	YIL033C	BCY1	1.30925	YIL033C	BCY1	1.01	YIL033C	BCY1	0.980681	0.934131	0.68	0.891346
	YJL164C	TPK1	0.745175	YJL164C	TPK1	0.75	YJL164C	TPK1	1.23101
	YKL166C	TPK3	1.18858	YKL166C	TPK3	0.3	YKL166C	TPK3	1.09078
	YPL203W	TPK2	0.493524	YPL203W	TPK2	0.66	YPL203W	TPK2	0.262906
chaperonin-containing T-complex	YDL143W	CCT4		YDL143W	CCT4		YDL143W	CCT4		0.867697	0.872	0.714665
	YDR188W	CCT6		YDR188W	CCT6		YDR188W	CCT6
	YDR212W	TCP1		YDR212W	TCP1		YDR212W	TCP1
	YIL142W	CCT2	0.644585	YIL142W	CCT2	0.71	YIL142W	CCT2	0.611647
	YJL008C	CCT8	0.961453	YJL008C	CCT8	0.98	YJL008C	CCT8	0.767934
	YJL014W	CCT3	0.856121	YJL014W	CCT3	0.79	YJL014W	CCT3	0.703908
	YJL111W	CCT7	0.871079	YJL111W	CCT7	0.83	YJL111W	CCT7	0.687754
	YJR064W	CCT5	1.00524	YJR064W	CCT5	1.05	YJR064W	CCT5	0.802082
chromatin assembly complex	YBR195C	MSI1	1.0741	YBR195C	MSI1	0.95	YBR195C	MSI1	0.649928	1.04967	0.943333	0.71422
	YML102W	CAC2	1.14128	YML102W	CAC2	1.12	YML102W	CAC2	0.836359
	YPR018W	RLF2	0.933634	YPR018W	RLF2	0.76	YPR018W	RLF2	0.656374
Chs5p/Arf-1binding proteins (ChAPs)	YDL192W	ARF1		YDL192W	ARF1		YDL192W	ARF1		1.07493	0.953333	1.10818
	YJL099W	CHS6	1.53381	YJL099W	CHS6	1.25	YJL099W	CHS6	1.57887
	YKR027W	BCH2	0.787986	YKR027W	BCH2		YKR027W	BCH2
	YLR330W	CHS5	1.09685	YLR330W	CHS5	0.94	YLR330W	CHS5	0.822995
	YMR237W	BCH1	0.881058	YMR237W	BCH1	0.67	YMR237W	BCH1	0.922659
				YOR299W	BUD7	1.08	YOR299W	BUD7	0.487248
COPI	YDL145C	COP1		YDL145C	COP1		YDL145C	COP1		0.663307	0.5575	0.515
	YDR238C	SEC26		YDR238C	SEC26		YDR238C	SEC26
	YER122C	GLO3	0.805974	YER122C	GLO3	0.88	YER122C	GLO3	0.86
	YFR051C	RET2		YFR051C	RET2		YFR051C	RET2
	YGL137W	SEC27		YGL137W	SEC27		YGL137W	SEC27
	YIL076W	SEC28	0.482603	YIL076W	SEC28	0.4	YIL076W	SEC28	0.33
	YNL287W	SEC21	0.795888	YNL287W	SEC21	0.88	YNL287W	SEC21	0.63
	YPL010W	RET3	0.568763	YPL010W	RET3	0.07	YPL010W	RET3	0.24
COPII	YAL007C	ERP2	0.573199	YAL007C	ERP2	0.76	YAL007C	ERP2	0.517516	0.798617	0.781429	0.742573
	YAR002C-A	ERP1	0.402174	YAR002C-A	ERP1	0.4	YAR002C-A	ERP1	0.250093
	YDL195W	SEC31		YDL195W	SEC31		YDL195W	SEC31
	YGL200C	EMP24		YGL200C	EMP24		YGL200C	EMP24
	YIL109C	SEC24	1.00996	YIL109C	SEC24	1.01	YIL109C	SEC24	1.18732
	YML012W	ERV25		YML012W	ERV25		YML012W	ERV25	0.382916
	YPL085W	SEC16	0.862433	YPL085W	SEC16	0.82	YPL085W	SEC16	0.727309
	YPL218W	SAR1	1.01031	YPL218W	SAR1	0.88	YPL218W	SAR1	1.32375
	YAL042W	ERV46	0.763645	YAL042W	ERV46	0.67	YAL042W	ERV46	0.69154
	YPR181C	SEC23	0.968593	YPR181C	SEC23	0.93	YPR181C	SEC23	0.860142
CORVET complex	YAL002W	VPS8	-0.001064	YDR495C	VPS3		YDR495C	VPS3		0.603339	0.876667	0.929554
	YDR495C	VPS3		YLR148W	PEP3	1.62	YLR148W	PEP3	0.876403
	YLR148W	PEP3	0.826251	YLR396C	VPS33		YLR396C	VPS33	1.13135
	YLR396C	VPS33	0.68423	YMR231W	PEP5	0.61	YMR231W	PEP5	0.714746
	YMR231W	PEP5	0.713344	YPL045W	VPS16	0.4	YPL045W	VPS16	0.995722
	YPL045W	VPS16	0.793933
eEF1	YAL003W	EFB1	0.6524	YAL003W	EFB1	0.89	YAL003W	EFB1	0.725513	0.716364	0.74	0.732155
	YBR118W	TEF2	0.628597	YBR118W	TEF2	0.66	YBR118W	TEF2	0.570492
	YKL081W	TEF4	0.929256	YKL081W	TEF4	0.64	YKL081W	TEF4	0.67445
	YPL048W	CAM1	0.974813	YPL048W	CAM1	0.99	YPL048W	CAM1	1.14277
	YPR080W	TEF1	0.396755	YPR080W	TEF1	0.52	YPR080W	TEF1	0.547548
eIF2, multi-eIF complex	YER025W	GCD11	0.756094	YER025W	GCD11	0.74	YER025W	GCD11	0.758447	0.862544	0.803333	0.777307
	YJR007W	SUI2	0.798142	YJR007W	SUI2	0.69	YJR007W	SUI2	0.732671
	YPL237W	SUI3	1.13692	YPL237W	SUI3	1.12	YPL237W	SUI3	0.962682
	YDR211W	GCD6		YDR211W	GCD6		YDR211W	GCD6
	YGR083C	GCD2		YGR083C	GCD2		YGR083C	GCD2
	YKR026C	GCN3	0.942996	YKR026C	GCN3	0.71	YKR026C	GCN3	0.673587
	YLR291C	GCD7	0.743663	YLR291C	GCD7	0.87	YLR291C	GCD7	0.769081
	YOR260W	GCD1	0.797445	YOR260W	GCD1	0.69	YOR260W	GCD1	0.767375
Elongator complex	YGR200C	ELP2		YGR200C	ELP2		YGR200C	ELP2		0.312442	0.846	0.659685
	YHR187W	IKI1	-1.07295	YHR187W	IKI1	1.19	YLR384C	IKI3	0.992604
	YLR384C	IKI3	0.752885	YLR384C	IKI3	1.14	YMR312W	ELP6	0.492256
	YMR312W	ELP6	0.736692	YMR312W	ELP6	0.57	YPL086C	ELP3	0.25913
	YPL086C	ELP3	0.122184	YPL086C	ELP3	0.34	YPL101W	ELP4	0.894752
	YPL101W	ELP4	1.02339	YPL101W	ELP4	0.99
ESCRT III complex	YKL002W	DID4		YKL002W	DID4	0.19	YKL002W	DID4	1.01462	1.05359	0.8225	0.896465
	YKL041W	VPS24	0.843465	YKL041W	VPS24	0.9	YKL041W	VPS24	0.8965
	YLR025W	SNF7	1.29463	YLR025W	SNF7	1.43	YLR025W	SNF7	0.98069
	YMR077C	VPS20	1.02268	YMR077C	VPS20	0.77	YMR077C	VPS20	0.694047
Exocyst complex	YBR102C	EXO84	1.00456	YBR102C	EXO84	0.82	YBR102C	EXO84	0.778988	0.836653	0.573333	0.770377
	YDR166C	SEC5		YDR166C	SEC5		YDR166C	SEC5
	YER008C	SEC3	0.790744	YER008C	SEC3	0.64	YER008C	SEC3	0.928919
	YGL233W	SEC15		YGL233W	SEC15		YGL233W	SEC15
	YIL068C	SEC6	0.825909	YIL068C	SEC6	0.05	YIL068C	SEC6	0.628093
	YJL085W	EXO70	0.97594	YJL085W	EXO70	0.58	YJL085W	EXO70	0.851228
	YLR166C	SEC10	0.711416	YLR166C	SEC10	0.87	YLR166C	SEC10	0.680082
	YPR055W	SEC8	0.711345	YPR055W	SEC8	0.48	YPR055W	SEC8	0.754954
Far complex	YDR200C	VPS64		YDR200C	VPS64		YDR200C	VPS64		0.990553	0.89	0.805247
	YFR008W	FAR7		YFR008W	FAR7		YFR008W	FAR7
	YLR238W	FAR10	0.605435	YLR238W	FAR10	1.56	YLR238W	FAR10	0.955796
	YMR029C	FAR8	1.25015	YMR029C	FAR8	0.8	YMR029C	FAR8	0.75901
	YMR052W	FAR3	1.18009	YMR052W	FAR3	0.45	YMR052W	FAR3	1.02289
	YNL127W	FAR11	0.926538	YNL127W	FAR11	0.75	YNL127W	FAR11	0.483292
Fatty Acid Import Complex	YBR041W	FAT1	0.955184	YBR041W	FAT1	1.04	YBR041W	FAT1	1.21569	0.708155	1.04667	1.03745
	YMR246W	FAA4	0.592537	YMR246W	FAA4	0.69	YMR246W	FAA4	0.720985
	YOR317W	FAA1	0.576744	YOR317W	FAA1	1.41	YOR317W	FAA1	1.17568
FBP degradation complex	YCL039W	GID7		YCL039W	GID7		YCL039W	GID7		0.867433	0.13	0.739997
	YDR255C	RMD5		YDR255C	RMD5		YDR255C	RMD5
	YGL227W	VID30		YGL227W	VID30		YGL227W	VID30
	YIL017C	VID28	1.04397	YIL017C	VID28	-0.33	YIL017C	VID28	0.942288
	YIL097W	FYV10	0.744699	YIL097W	FYV10		YIL097W	FYV10
	YMR135C	GID8	0.81363	YMR135C	GID8	0.59	YMR135C	GID8	0.537706
Golgi transport complex	YER157W	COG3	0.553092	YER157W	COG3	0.68	YER157W	COG3	0.944743	0.626019	0.75	0.764081
	YGL005C	COG7		YGL005C	COG7		YGL005C	COG7
	YGL223C	COG1		YGL223C	COG1		YGL223C	COG1
	YGR120C	COG2		YGR120C	COG2		YGR120C	COG2
	YML071C	COG8	0.520725	YML071C	COG8	0.89	YML071C	COG8	0.811649
	YNL041C	COG6	0.751248	YNL041C	COG6	0.86	YNL041C	COG6	0.772419
	YNL051W	COG5	0.560815	YNL051W	COG5	0.5	YNL051W	COG5	0.441751
	YPR105C	COG4	0.744215	YPR105C	COG4	0.82	YPR105C	COG4	0.849844
HAT-B complex	YEL056W	HAT2	0.992234	YEL056W	HAT2	0.93	YEL056W	HAT2	0.981183	0.941745	0.436667	0.835902
	YLL022C	HIF1	0.852458	YLL022C	HIF1	-0.66	YLL022C	HIF1	0.724571
	YPL001W	HAT1	0.980544	YPL001W	HAT1	1.04	YPL001W	HAT1	0.801952
HIR complex	YBL008W	HIR1	0.657199	YBL008W	HIR1	0.6	YBL008W	HIR1	0.820161	0.880607	0.8225	0.503576
	YBR215W	HPC2	0.662447	YBR215W	HPC2	0.41	YBR215W	HPC2	0.362621
	YJR140C	HIR3	1.43818	YJR140C	HIR3	1.56	YJR140C	HIR3	0.054429
	YOR038C	HIR2	0.764605	YOR038C	HIR2	0.72	YOR038C	HIR2	0.777095
Ino80p complex	YDL002C	NHP10		YDL002C	NHP10		YDL002C	NHP10		0.864848	0.821429	0.727341
	YFL013C	IES1		YFL013C	IES1		YFL013C	IES1
	YGL150C	INO80		YGL150C	INO80		YGL150C	INO80
	YLR052W	IES3	0.326932	YLR052W	IES3	0.12	YLR052W	IES3	0.366145
	YNL059C	ARP5	1.3136	YNL059C	ARP5	1.25	YNL059C	ARP5	0.981567
	YOR141C	ARP8	0.868954	YOR141C	ARP8	0.8	YOR141C	ARP8	0.889665
	YOR189W	IES4	0.788872	YOR189W	IES4	0.96	YOR189W	IES4	0.376153
	YFL039C	ACT1		YFL039C	ACT1		YFL039C	ACT1
	YJL081C	ARP4	0.915892	YJL081C	ARP4	0.9	YJL081C	ARP4	0.929882
	YPL129W	TAF14	0.838633	YPL129W	TAF14	0.77	YPL129W	TAF14	0.712082
	YDR190C	RVB1		YDR190C	RVB1		YDR190C	RVB1
	YPL235W	RVB2	1.00105	YPL235W	RVB2	0.95	YPL235W	RVB2	0.83589
Mcm2-7 complex	YBL023C	MCM2	0.839963	YBL023C	MCM2	0.81	YBL023C	MCM2	0.950418	0.940591	0.946	0.967264
	YBR202W	MCM7	1.21775	YBR202W	MCM7	1.13	YBR202W	MCM7	1.23137
	YEL032W	MCM3	1.02909	YEL032W	MCM3	0.91	YEL032W	MCM3	0.845543
	YGL201C	MCM6		YGL201C	MCM6		YGL201C	MCM6
	YLR274W	MCM5	0.63624	YLR274W	MCM5	0.82	YLR274W	MCM5	0.899093
	YPR019W	MCM4	0.979903	YPR019W	MCM4	1.06	YPR019W	MCM4	0.909902
Ndc80p complex	YIL144W	TID3	0.657839	YIL144W	TID3	0.64	YIL144W	TID3	0.0214584	0.895216	0.82	0.567619
	YMR117C	SPC24	0.737487	YMR117C	SPC24		YMR117C	SPC24	0.685353
	YOL069W	NUF2	1.29032	YOL069W	NUF2	1	YOL069W	NUF2	0.996045
Npa2p-containing subcomplex	YJR041C	URB2	1.40744	YJR041C	URB2	0.76	YJR041C	URB2	1.13417	0.704483	0.506	0.590409
	YKL014C	URB1	0.597384	YKL014C	URB1	0.75	YKL014C	URB1	0.650205
	YLR221C	RSA3	0.557366	YLR221C	RSA3	0.62	YLR221C	RSA3	0.563927
	YNR038W	DBP6	1.0159	YNR038W	DBP6	0.71	YNR038W	DBP6	0.669942
	YOL144W	NOP8	-0.05567	YOL144W	NOP8	-0.31	YOL144W	NOP8	-0.0662025
Nup84p complex	YDL116W	NUP84		YDL116W	NUP84		YDL116W	NUP84		0.656932	0.53	0.577133
	YGL092W	NUP145		YGL092W	NUP145		YGL092W	NUP145
	YGL100W	SEH1		YGL100W	SEH1		YGL100W	SEH1
	YJR042W	NUP85	0.672552	YJR042W	NUP85	0.46	YJR042W	NUP85	0.887088
	YKL057C	NUP120	0.521558	YKL057C	NUP120	0.74	YKL057C	NUP120	0.58819
	YLR208W	SEC13	0.776688	YLR208W	SEC13	0.39	YLR208W	SEC13	0.256121
PAM complex	YIL022W	TIM44	1.25063	YIL022W	TIM44	0.86	YIL022W	TIM44	1.06568	1.00815	0.763333	0.670624
	YJR045C	SSC1	0.861779	YJR045C	SSC1	1.08	YJR045C	SSC1	0.801926
	YKR065C	PAM17	1.52637	YKR065C	PAM17	1.31	YKR065C	PAM17	0.939641
	YOR232W	MGE1	1.1443	YOR232W	MGE1	0.8	YOR232W	MGE1	0.612386
	YJL104W	PAM16	0.724583	YJL104W	PAM16	0.53	YJL104W	PAM16	0.303652
	YLR008C	PAM18	0.541238	YLR008C	PAM18	0	YLR008C	PAM18	0.300463
PI3-kinase	YBR097W	VPS15	1.44365	YBR097W	VPS15		YBR097W	VPS15	0.359258	0.811054	0.66	0.546319
	YLR240W	VPS34	0.595156	YLR240W	VPS34	1.12	YLR240W	VPS34	1.1364
	YPL120W	VPS30	0.944414	YPL120W	VPS30	0.2	YPL120W	VPS30	1.08735
	YLR360W	VPS38	0.260993	YLR360W	VPS38		YLR360W	VPS38	-0.397728
polarisome complex	YER149C	PEA2	0.687704	YER149C	PEA2	0.73	YER149C	PEA2	0.775508	0.827413	0.716667	0.796391
	YLL021W	SPA2	0.855181	YLL021W	SPA2	0.88	YLL021W	SPA2	0.759981
	YLR319C	BUD6	0.939353	YLR319C	BUD6	0.54	YLR319C	BUD6	0.853685
protein kinase CK2 complex, UTP C complex	YGL019W	CKB1		YGL019W	CKB1		YGL019W	CKB1		0.884172	0.74	0.895167
	YIL035C	CKA1	0.979799	YIL035C	CKA1	0.93	YIL035C	CKA1	0.956129
	YOR061W	CKA2	0.937118	YOR061W	CKA2	0.75	YOR061W	CKA2	1.01266
	YOR039W	CKB2	0.7356	YOR039W	CKB2	0.54	YOR039W	CKB2	0.716715
retromer complex	YHR012W	VPS29	0.804063	YHR012W	VPS29	0.86	YHR012W	VPS29	0.931873	0.325898	0.82	1.07883
	YJL053W	PEP8	0.91506	YJL053W	PEP8	0.85	YJL053W	PEP8	1.03396
	YJL154C	VPS35	-2.31723	YJL154C	VPS35	0.61	YJL154C	VPS35	0.943226
	YOR069W	VPS5	1.05614	YOR069W	VPS5	0.7	YOR069W	VPS5	1.0997
	YOR132W	VPS17	1.17146	YOR132W	VPS17	1.08	YOR132W	VPS17	1.38539
Rix1p complex	YHR085W	IPI1	0.943057	YHR085W	IPI1	0.92	YHR085W	IPI1	0.849769	0.752084	0.696667	0.625565
	YHR197W	RIX1	0.478737	YHR197W	RIX1	0.48	YHR197W	RIX1	0.425827
	YNL182C	IPI3	0.834458	YNL182C	IPI3	0.69	YNL182C	IPI3	0.601099
Rsp5p/Bul1 ubiquitin ligase complex	YMR275C	BUL1	1.06404	YMR275C	BUL1	1.15	YMR275C	BUL1	0.982449	0.993307	1.08	0.970794
	YER125W	RSP5	0.943374	YER125W	RSP5	0.99	YER125W	RSP5	0.987513
	YML111W	BUL2	0.972513	YML111W	BUL2	1.1	YML111W	BUL2	0.942419
SAGA complex	YBR111W-A	SUS1	0.43075	YBR111W-A	SUS1	0.25	YBR111W-A	SUS1	0.42394	0.655688	0.485	0.690816
	YCL010C	SGF29		YCL010C	SGF29		YCL010C	SGF29
	YLR055C	SPT8	0.888343	YLR055C	SPT8	0.64	YLR055C	SPT8	0.866649
	YBR081C	SPT7	0.928174	YBR081C	SPT7	0.77	YBR081C	SPT7	0.600015
	YDR392W	SPT3		YDR392W	SPT3		YDR392W	SPT3
	YER164W	CHD1	0.677394	YER164W	CHD1	0.59	YER164W	CHD1	0.671659
	YGL066W	SGF73		YGL066W	SGF73		YGL066W	SGF73
	YMR223W	UBP8	0.699647	YMR223W	UBP8	0.33	YMR223W	UBP8	0.852139
	YOL148C	SPT20	0.30982	YOL148C	SPT20	0.33	YOL148C	SPT20	0.730495
signal peptidase complex	YIR022W	SEC11	0.688689	YIR022W	SEC11	-0.87	YIR022W	SEC11	0.52018	0.763462	0.42	0.81843
	YLR066W	SPC3	0.746093	YJR010C-A	SPC1	0.44	YLR066W	SPC3	0.98969
	YML055W	SPC2	0.855605	YLR066W	SPC3	1.03	YML055W	SPC2	0.945419
				YML055W	SPC2	1.08
Signal recognition particle (SRP)	YDL092W	SRP14		YDL092W	SRP14		YDL092W	SRP14		0.69195	0.582	0.677716
	YKL122C	SRP21	0.454578	YKL122C	SRP21	0.02	YKL122C	SRP21	0.371062
	YML105C	SEC65	0.41366	YML105C	SEC65	0.46	YML105C	SEC65	0.626783
	YPL210C	SRP72	0.884033	YPL210C	SRP72	0.94	YPL210C	SRP72	1.06755
	YPL243W	SRP68	0.895113	YPL243W	SRP68	0.88	YPL243W	SRP68	0.859072
	YPR088C	SRP54	0.812364	YPR088C	SRP54	0.61	YPR088C	SRP54	0.464109
SPB components	YAL047C	SPC72	0.962762	YAL047C	SPC72	0.12	YAL047C	SPC72	0.771083	0.785017	0.686667	0.617718
	YBR109C	CMD1	0.75	YBR109C	CMD1	0.76	YBR109C	CMD1	0.898993
	YDR356W	SPC110		YDR356W	SPC110		YDR356W	SPC110
	YKL042W	SPC42	0.633806	YKL042W	SPC42	0.71	YKL042W	SPC42	0.518952
	YNL225C	CNM67	0.941708	YNL225C	CNM67	0.99	YNL225C	CNM67	0.338116
	YOR373W	NUD1	0.658018	YOR373W	NUD1	0.52	YOR373W	NUD1	0.561444
	YPL124W	SPC29	0.763807	YPL124W	SPC29	1.02
Swr1p complex	YAL011W	SWC3	0.718557	YAL011W	SWC3	0.75	YAL011W	SWC3	0.562092	0.798171	0.636667	0.677766
	YBR231C	SWC5	0.977414	YBR231C	SWC5	0.94	YBR231C	SWC5	0.539418
	YDR334W	SWR1		YDR334W	SWR1		YDR334W	SWR1
	YDR485C	VPS72		YDR485C	VPS72		YDR485C	VPS72
	YLR085C	ARP6	1.04718	YLR085C	ARP6		YLR085C	ARP6	0.931789
	YLR385C	SWC7	0.74152	YML041C	VPS71	0.22
	YML041C	VPS71	0.506185
Tap42p/Pph21p/Rrd2p complex	YPL152W	RRD2	1.10506	YPL152W	RRD2	1.17	YPL152W	RRD2	0.875972	1.05289	0.985	0.944841
	YIL153W	RRD1	0.979839	YIL153W	RRD1		YIL153W	RRD1
	YMR028W	TAP42	1.07378	YMR028W	TAP42	0.8	YMR028W	TAP42	1.01371
THO complex	YHR167W	THP2	0.751948	YHR167W	THP2	0.32	YHR167W	THP2	0.49281	0.597239	0.31	0.333697
	YML062C	MFT1	0.472417	YML062C	MFT1	0.42	YML062C	MFT1	0.294886
	YNL139C	THO2	0.567351	YNL139C	THO2	0.19	YNL139C	THO2	0.213396
	YDR138W	HPR1		YDR138W	HPR1		YDR138W	HPR1
TORC 1 complex	YHR186C	KOG1	0.383112	YHR186C	KOG1	0.93	YHR186C	KOG1	0.820269	0.712948	0.67	0.795083
	YJR066W	TOR1	1.02433	YJR066W	TOR1		YJR066W	TOR1	1.14177
	YPL180W	TCO89	0.731403	YPL180W	TCO89	0.41	YPL180W	TCO89	0.423209
TORC 2 complex	YER093C	TSC11		YER093C	TSC11	0.54	YER093C	TSC11	0.743282	0.462513	0.8025	0.799638
	YIL105C	SLM1	1.12659	YIL105C	SLM1	0.37	YIL105C	SLM1	1.04071
	YJL058C	BIT61		YKL203C	TOR2	1.06	YKL203C	TOR2	0.940659
	YKL203C	TOR2	0.629995	YNL047C	SLM2	1.24	YMR068W	AVO2
	YNL047C	SLM2	-0.485468	YOL078W	AVO1		YNL047C	SLM2	0.657728
	YOL078W	AVO1	0.578935				YOL078W	AVO1	0.615814
transcription factor TFIID complex	YCR042C	TAF2		YCR042C	TAF2		YCR042C	TAF2		0.694796	0.482857	0.540655
	YGR274C	TAF1		YGR274C	TAF1		YGR274C	TAF1
	YML015C	TAF11	1.00225	YML015C	TAF11	0.74	YML015C	TAF11	0.937239
	YML098W	TAF13	0.888497	YML098W	TAF13	0.78	YML098W	TAF13	0.719712
	YML114C	TAF8	0.505851	YML114C	TAF8	0.5	YML114C	TAF8	0.233694
	YMR005W	TAF4	0.433399	YMR005W	TAF4	0.35	YMR005W	TAF4	0.391022
	YMR227C	TAF7	0.809442	YMR227C	TAF7	0.24	YMR227C	TAF7	0.701819
	YPL011C	TAF3	0.859673	YPL011C	TAF3		YPL011C	TAF3
	YBR198C	TAF5	0.969403	YBR198C	TAF5	0.77	YBR198C	TAF5	0.91349
	YDR145W	TAF12		YDR145W	TAF12		YDR145W	TAF12
	YDR167W	TAF10		YDR167W	TAF10		YDR167W	TAF10
	YGL112C	TAF6		YGL112C	TAF6		YGL112C	TAF6
	YMR236W	TAF9	0.0898489	YMR236W	TAF9	0	YMR236W	TAF9	-0.112394
transcription factor TFIIH complex	YDL108W	KIN28		YDL108W	KIN28		YDL108W	KIN28		0.766749	0.715	0.96899
	YDR079C-A	TFB5		YDR079C-A	TFB5		YDR079C-A	TFB5
	YDR460W	TFB3		YDR460W	TFB3		YDR460W	TFB3
	YPR025C	CCL1	0.653072	YPR025C	CCL1	0.76	YPR025C	CCL1	0.635902
	YDR311W	TFB1		YDR311W	TFB1		YDR311W	TFB1
	YER171W	RAD3	1.06698	YER171W	RAD3	0.97	YER171W	RAD3	1.39351
	YIL143C	SSL2	0.883039	YIL143C	SSL2	0.07	YLR005W	SSL1	1.12761
	YLR005W	SSL1	0.568529	YLR005W	SSL1	0.81	YPL122C	TFB2	0.995832
	YPL122C	TFB2	0.983173	YPL122C	TFB2	1.14	YPR056W	TFB4	0.6921
	YPR056W	TFB4	0.445694	YPR056W	TFB4	0.54
transcription factor TFIIIC complex	YAL001C	TFC3	0.24261	YAL001C	TFC3	0.51	YAL001C	TFC3	0.643774	0.720132	0.6575	0.754002
	YBR123C	TFC1	0.854414	YBR123C	TFC1	0.73	YBR123C	TFC1	0.663804
	YDR362C	TFC6		YDR362C	TFC6		YDR362C	TFC6
	YGR047C	TFC4		YGR047C	TFC4		YGR047C	TFC4
	YOR110W	TFC7	0.701231	YOR110W	TFC7	1.04	YOR110W	TFC7	0.617428
	YPL007C	TFC8	1.08227	YPL007C	TFC8	0.35	YPL007C	TFC8	1.091
U2 snRNP complex	YNL286W	CUS2	0.600757	YNL286W	CUS2	0.77	YNL286W	CUS2	0.245465	0.802136	0.845	0.70759
	YPL213W	LEA1	0.769335	YPL213W	LEA1	0.95	YPL213W	LEA1	0.562646
	YML049C	RSE1	0.897228	YML049C	RSE1	1.17	YML049C	RSE1	0.991099
	YMR240C	CUS1	0.965752	YMR240C	CUS1	1.01	YMR240C	CUS1	0.926439
	YMR288W	HSH155	1.01872	YMR288W	HSH155	0.96	YMR288W	HSH155	0.812299
	YOR319W	HSH49	0.561023	YOR319W	HSH49	0.21	YOR319W	HSH49
U4/U6 x U5 tri-snRNP complex	YBR055C	PRP6	0.834912	YBR055C	PRP6	0.75	YBR055C	PRP6	0.561463	0.87821	0.8	0.645949
	YBR152W	SPP381	0.8206	YBR152W	SPP381	0.81	YBR152W	SPP381	1.00286
	YDL098C	SNU23		YDL098C	SNU23		YDL098C	SNU23
	YDR473C	PRP3		YDR473C	PRP3		YDR473C	PRP3
	YGR091W	PRP31		YGR006W	PRP18		YGR091W	PRP31
	YOR308C	SNU66	1.10474	YGR091W	PRP31		YOR308C	SNU66	0.828545
	YPR178W	PRP4	0.752588	YOR308C	SNU66	0.84	YPR178W	PRP4	0.190932
				YPR178W	PRP4
U5 snRNP complex	YBL074C	AAR2	1.12504	YBL074C	AAR2	1.17	YBL074C	AAR2	1.40774	0.880804	0.904	1.04275
	YDR243C	PRP28		YDR243C	PRP28		YDR243C	PRP28
	YHR156C	LIN1	1.27472	YHR156C	LIN1	1.44	YHR156C	LIN1	1.28736
	YER172C	BRR2	1.08969	YER172C	BRR2	0.78	YER172C	BRR2	0.83544
	YHR165C	PRP8	0.479959	YHR165C	PRP8	0.48	YHR165C	PRP8	0.797868
	YKL173W	SNU114	0.881786	YKL173W	SNU114	0.65	YKL173W	SNU114	0.885338
	YPR082C	DIB1	0.433621
ubiquitin ligase ERAD-L complex	YML029W	USA1	1.15579	YML029W	USA1		YML029W	USA1	1.11271	0.957879	0.78	0.932306
	YDR057W	YOS9		YDR057W	YOS9		YDR057W	YOS9
	YLR207W	HRD3	0.916942	YLR207W	HRD3	0.78	YLR207W	HRD3	0.751903
	YOL013C	HRD1	0.800903
UTP A complex	YDR324C	UTP4		YDR324C	UTP4		YDR324C	UTP4		0.780888	0.642	0.709004
	YEL055C	POL5	1.0199	YEL055C	POL5	1.01	YEL055C	POL5	1.15019
	YGR128C	UTP8		YGR128C	UTP8		YGR128C	UTP8
	YHR196W	UTP9	0.995392	YHR196W	UTP9	1.12	YHR196W	UTP9	1.05864
	YJL109C	UTP10	1.33436	YJL109C	UTP10	0.64	YJL109C	UTP10	0.819793
	YMR093W	UTP15	0.292833	YMR093W	UTP15	0.09	YMR093W	UTP15	0.283001
	YPL126W	NAN1	0.261953	YPL126W	NAN1	0.35	YPL126W	NAN1	0.233387
UTP B complex	YCR057C	PWP2		YCR057C	PWP2		YCR057C	PWP2		0.869723	0.7425	0.738945
	YDR449C	UTP6		YDR449C	UTP6		YDR449C	UTP6
	YJL069C	UTP18	0.730415	YJL069C	UTP18	0.52	YJL069C	UTP18	0.572997
	YLR129W	DIP2	1.12785	YLR129W	DIP2	1.06	YLR129W	DIP2	1.07847
	YLR222C	UTP13	1.13949	YLR222C	UTP13	0.92	YLR222C	UTP13	0.961004
	YLR409C	UTP21	0.481142	YLR409C	UTP21	0.47	YLR409C	UTP21	0.343316
