# Supplementary material for: Quantitative proteomic analysis reveals posttranslational responses to aneuploidy in yeast
Source: eLife journal article supplement (doi:10.7554/elife.03023), 2014-07-29
Supplement: supp [file elife-03023-supp-v1.zip › elife_poa_e03023_Figure_6_source_data_1.xlsx]

## Sheet: Sheet1
TABLE S6. Aneuploidy-Specific Response (APR)
Gene Ontology term	Cluster frequency	Genome frequency	Corrected	FDR	FALSE	Genes annotated to the term
			P-value		Positives
cellular response to oxidative stress	11 of 92 genes, 12.0%	72 of 3971 genes, 1.8%	0.00024	0	0	YGR209C, YLR109W, YPL059W, YKR066C, YLR043C, YBL064C, YKL056C, YDL166C, YBL055C, YCL035C, YJR104C
response to oxidative stress	11 of 92 genes, 12.0%	77 of 3971 genes, 1.9%	0.00048	0	0	YGR209C, YLR109W, YPL059W, YKR066C, YLR043C, YBL064C, YKL056C, YDL166C, YBL055C, YCL035C, YJR104C
single-organism metabolic process	43 of 92 genes, 46.7%	1008 of 3971 genes, 25.4%	0.00274	0	0	YEL038W, YOR317W, YMR311C, YLR109W, YJR105W, YKR076W, YML022W, YNL281W, YCL035C, YPR118W, YPL170W, YKR043C, YGR209C, YPL117C, YBR109C, YLR043C, YGR208W, YNL141W, YCR053W, YBL064C, YCL026C-B, YFL045C, YFL047W, YER062C, YOL023W, YLR231C, YPR069C, YJR104C, YJR070C, YLR146C, YDR400W, YHR201C, YMR008C, YGR234W, YEL047C, YLR285W, YKR066C, YIL145C, YDL106C, YOR323C, YNL135C, YDL125C, YPL273W														0.836957
cellular modified amino acid metabolic process	9 of 92 genes, 9.8%	66 of 3971 genes, 1.7%	0.00735	0.005	0.02	YLR231C, YEL038W, YPL273W, YPR069C, YIL145C, YJR070C, YPR118W, YLR146C, YKR076W
																				BMC Genomics 2008, 9:440	Cell Rep. 2013 Aug 29;4(4):842-51	Mol Cell Proteomics. 2012 Nov;11(11):1510-22
																				Nat Biotechnol. 2003 Aug;21(8):921-6			http://www.sbeams.org/
YORF	GENE	description	AVERAGE	STDEV			Dis I/WT	Dis II/WT	Dis V/WT	Dis VIII/WT	Dis IX/WT	Dis X/WT	Dis XI/WT	Dis XII/WT	Dis XIII/WT	Dis XIV/WT	Dis XV/WT	Dis XVI/WT		Ubiquitin	Succinyl	Acetylation	Phosphorylation
Response to ROS																				28	28	39	68
YLR043C	TRX1	Cytoplasmic thioredoxin isoenzyme; part of thioredoxin system which protects cells against oxidative and reductive stress; forms LMA1 complex with Pbi2p; acts as a cofactor for Tsa1p; required for ER-Golgi transport and vacuole inheritance; with Trx2p, facilitates mitochondrial import of small Tims Tim9p, Tim10p, Tim13p by maintaining them in reduced form; abundance increases iunder DNA replicati…	1.08205	0.707242			0.10071	0.794795	0.697685	1.22913	1.16072	0.531167	0.469284	2.79149	1.38193	0.756091	1.72542	1.34616	YLR043C		1	1	1
YGR209C	TRX2	Cytoplasmic thioredoxin isoenzyme; part of thioredoxin system which protects cells against oxidative and reductive stress; forms LMA1 complex with Pbi2p; acts as a cofactor for Tsa1p; required for ER-Golgi transport and vacuole inheritance; with Trx1p, facilitates mitochondrial import of small Tims Tim9p, Tim10p, Tim13p by maintaining them in reduced form; abundance increases under DNA replicatio…	0.997098	0.554853			0.0340907	0.972174	0.551928	1.47138	1.03512	0.487593	0.491794	1.02227	1.77927	1.21962	1.92265	0.977283	YGR209C	1	1	1	1
YBL064C	PRX1	Mitochondrial peroxiredoxin with thioredoxin peroxidase activity; has a role in reduction of hydroperoxides; reactivation requires Trr2p and glutathione; induced during respiratory growth and oxidative stress; phosphorylated; protein abundance increases in response to DNA replication stress	0.257023	0.489524			-0.184264	1.40912	-0.383147	0.400328	0.279786	-0.128062	0.0893985	-0.0437488	0.849832	0.255161	0.449421	0.0904565	YBL064C		1	1	1
YLR109W	AHP1	Thiol-specific peroxiredoxin; reduces hydroperoxides to protect against oxidative damage; function in vivo requires covalent conjugation to Urm1p	1.02779	0.655952			0.0256866	1.03792	0.197618	1.26514	1.84075	0.812873	0.615302	1.2205	2.37234	0.61266	1.32487	1.00781	YLR109W	1	1	1	1
YJR104C	SOD1	Cytosolic copper-zinc superoxide dismutase; detoxifies superoxide and is involved in repressing respiration in the presence of glucose, via stabilization of Yck1p and Yck2p kinases; human ortholog is implicated in ALS (amyotrophic lateral sclerosis); abundance increases under DNA replication stress and during prolonged exposure to boric acid; a fraction is localized to the mitochondrial intermemb…	0.898406	0.483209			0.361551	0.786174	0.861325	1.03656	0.888697	1.5258	0.280731	0.65827	1.87508	0.552602	1.38225	0.57183	YJR104C		1	1	1
YCL035C	GRX1	Glutathione-dependent disulfide oxidoreductase; hydroperoxide and superoxide-radical responsive, heat-stable, with active site cysteine pair; protects cells from oxidative damage; GRX1 has a paralog, GRX2, that arose from the whole genome duplication; protein abundance increases in response to DNA replication stress	0.996294	0.646785			0.0129607	1.02106	0.54282	1.19429	0.420996	0.309984	0.502582	1.47178	1.39268	1.33515	2.26231	1.48892	YCL035C	1		1	1
YPL059W	GRX5	Hydroperoxide and superoxide-radical responsive glutathione-dependent oxidoreductase; mitochondrial matrix protein involved in the synthesis/assembly of iron-sulfur centers; monothiol glutaredoxin subfamily member along with Grx3p and Grx4p	0.459164	0.339676			-0.074313	0.0818655	0.322669	0.529577	0.762861	0.443929	0.498348	0.525367	0.623392	0.0286307	0.612469	1.15517	YPL059W		1	1	1
YKL056C	TMA19	Protein that associates with ribosomes; homolog of translationally controlled tumor protein; green fluorescent protein (GFP)-fusion protein localizes to the cytoplasm and relocates to the mitochondrial outer surface upon oxidative stress	0.548876	0.304591			0.307188	0.538686	0.30155	0.708742	0.660393	0.478069	1.31378	0.502044	0.659777	0.165832	0.250839	0.699619	YKL056C		1	1	1
YKR066C	CCP1	Mitochondrial cytochrome-c peroxidase; degrades reactive oxygen species in mitochondria, involved in the response to oxidative stress	0.374527	0.405968			0.0771989	0.261909	0.445856	0.362299	0.368069	0.174151	1.1074	-0.294956	1.05007	0.0233798	0.668034	0.250922	YKR066C			1	1
YBL055C		3'-->5' exonuclease and endonuclease with a possible role in apoptosis; has similarity to mammalian and C. elegans apoptotic nucleases	0.408145	0.263206			0.176218	1.04667	0.38346	0.418645	0.426004	0.398376	0.0336007	0.504068	0.438025	0.329199	0.107017	0.636453	YBL055C
YDL166C	FAP7	Essential NTPase required for small ribosome subunit synthesis; mediates processing of the 20S pre-rRNA at site D in the cytoplasm but associates only transiently with 43S preribosomes via Rps14p, may be the endonuclease for site D	0.724134	0.230037			0.411325	0.587551	0.955375	0.962135	0.92715	0.586515	0.303006	0.807608	0.978931	0.631123	0.640382	0.898508	YDL166C		1		1
YPR069C	SPE3	Spermidine synthase; involved in biosynthesis of spermidine and also in biosynthesis of pantothenic acid; spermidine is required for growth of wild-type cells	0.770105	0.393976			0.455856	0.372844	0.43138	0.661194	1.2329	0.365006	0.509136	1.13406	1.15523	0.626371	0.76798	1.52931	YPR069C		1	1	1
YLR146C	SPE4	Spermine synthase; required for the biosynthesis of spermine and also involved in biosynthesis of pantothenic acid	0.882312	0.535637			0.334633	0.304392	0.47983	0.827639	1.2653	0.381909	0.528386	1.81183	1.67068	0.540969	1.18162	1.26055	YLR146C				1
Metabolism																			Metabolism
YBR109C	CMD1	Calmodulin; Ca++ binding protein that regulates Ca++ independent processes (mitosis, bud growth, actin organization, endocytosis, etc.) and Ca++ dependent processes (stress-activated pathways), targets include Nuf1p, Myo2p and calcineurin	0.334425	0.186863			0.109708	0.759946	0.193315	0.217253	0.426839	0.137815	0.204106	0.517871	0.256592	0.348869	0.422801	0.417979	YBR109C	1		1	1
YCL026C-B	HBN1	Protein of unknown function; similar to bacterial nitroreductases; green fluorescent protein (GFP)-fusion protein localizes to the cytoplasm and nucleus; protein becomes insoluble upon intracellular iron depletion; protein abundance increases in response to DNA replication stress	0.292407	0.481481			0.0894682	0.0270822	0.372298	0.708519	0.464179	-0.620755	-0.361807	0.510249	0.57714	-0.0222672	0.734258	1.03052	YCL026C-B				1
YCR053W	THR4	Threonine synthase; conserved protein that catalyzes formation of threonine from O-phosphohomoserine; expression is regulated by the GCN4-mediated general amino acid control pathway	0.694326	0.285244			0.41016	0.454994	0.865904	0.758379	1.08496	0.324461	0.426612	1.05301	1.13533	0.582777	0.530957	0.70437	YCR053W	1	1	1	1
YDL106C	PHO2	Homeobox transcription factor; regulatory targets include genes involved in phosphate metabolism; binds cooperatively with Pho4p to the PHO5 promoter; phosphorylation of Pho2p facilitates interaction with Pho4p; relocalizes to the cytosol in response to hypoxia	0.189995	0.215689			0.118079	-0.113787	0.164842	0.251973	0.248834	-0.0775389	0.119923	0.283707	0.643205	0.348368	-0.062107	0.354441	YDL106C				1
YDL125C	HNT1	Adenosine 5'-monophosphoramidase; interacts physically and genetically with Kin28p, a CDK and TFIIK subunit, and genetically with CAK1; member of the histidine triad (HIT) superfamily of nucleotide-binding proteins and similar to Hint; protein abundance increases in response to DNA replication stress	0.781319	0.381842			0.408896	0.691091	1.00507	0.713461	1.12489	0.548274	0.351439	0.921843	1.28344	0.0651977	1.2199	1.04231	YDL125C			1	1
YDR400W	URH1	Uridine nucleosidase (uridine-cytidine N-ribohydrolase); cleaves N-glycosidic bonds in nucleosides; involved in the pyrimidine salvage and nicotinamide riboside salvage pathways	0.902371	0.407527			0.440665	0.644341	1.02582	1.37059	1.09068	0.399953	0.244859	1.15782	1.22136	0.617265	1.39644	1.21864	YDR400W
YEL038W	UTR4	Protein with sequence similarity to 2,3-diketo-5-methylthiopentyl-1-phosphate enolase-phosphatases, involved in methionine salvage; found in both the cytoplasm and nucleus	0.56257	0.445024			0.411253	0.566451	1.47167	0.636342	0.408166	-0.004541	-0.0927555	0.840966	1.18862	0.287934	0.518313	0.518417	YEL038W
YEL047C	FRD1	Soluble fumarate reductase; required with isoenzyme Osm1p for anaerobic growth; may interact with ribosomes, based on co-purification experiments; authentic, non-tagged protein is detected in purified mitochondria in high-throughput studies; similar to Arxula adeninovorans fumarate reductase; protein abundance increases in response to DNA replication stress; FRD1 has a paralog, OSM1, that arose f…	0.58394	0.431094			0.425074	0.186867	1.62828	0.343265	0.821123	0.044646	0.550282	0.825778	0.829851	0.322768	0.80431	0.225026	YEL047C		1	1	1
YER062C	HOR2	DL-glycerol-3-phosphate phosphatase involved in glycerol biosynthesis; also known as glycerol-1-phosphatase; induced in response to hyperosmotic or oxidative stress, and during diauxic shift; HOR2 has a paralog, RHR2, that arose from the whole genome duplication	0.466815	0.606345			0.333128	0.677077	1.24983	0.743207	0.886862	-0.474248	0.0297029	0.22451	0.939572	-0.621017	1.22072	0.392432	YER062C	1		1	1
YFL047W	RGD2	GTPase-activating protein (RhoGAP) for Cdc42p and Rho5p; relocalizes from bud neck to cytoplasm upon DNA replication stress	0.0909191	0.153718			0.0709094	-0.040684	0.198661	-0.00856565	0.135576	0.126383	-0.194294	0.414631	0.01829	0.00132265	0.200637	0.168162	YFL047W				1
YGR208W	SER2	Phosphoserine phosphatase of the phosphoglycerate pathway; involved in serine and glycine biosynthesis, expression is regulated by the available nitrogen source	1.02333	0.467105			0.350381	0.73833	1.36428	1.10926	1.29247	0.602294	0.804018	2.06816	1.34292	0.551753	0.90913	1.14699	YGR208W		1
YGR234W	YHB1	Nitric oxide oxidoreductase; flavohemoglobin involved in nitric oxide detoxification; plays a role in the oxidative and nitrosative stress responses; protein increases in abundance and relocalizes from nucleus to cytoplasmic foci upon DNA replication stress	0.482345	0.29964			0.285039	0.1437	0.802324	0.550032	0.955955	0.087862	0.105751	0.504186	0.646729	0.711055	0.247735	0.747771	YGR234W	1		1	1
YHR201C	PPX1	Exopolyphosphatase; hydrolyzes inorganic polyphosphate (poly P) into Pi residues; located in the cytosol, plasma membrane, and mitochondrial matrix	0.852373	0.411066			0.476841	0.757398	1.04685	1.91505	0.937953	1.06986	0.345904	0.743116	1.05089	0.596099	0.528525	0.759981	YHR201C
YIL145C	PAN6	Pantothenate synthase; also known as pantoate-beta-alanine ligase, required for pantothenic acid biosynthesis, deletion causes pantothenic acid auxotrophy, homologous to E. coli panC	0.48195	0.480719			0.325214	0.286356	0.528119	0.455038	1.87096	0.063965	0.103886	0.274612	0.643323	0.178685	0.347263	0.705974	YIL145C				1
YJR070C	LIA1	Deoxyhypusine hydroxylase; HEAT-repeat containing metalloenzyme that catalyzes hypusine formation; binds to and is required for the modification of Hyp2p (eIF5A); complements S. pombe mmd1 mutants defective in mitochondrial positioning; protein abundance increases in response to DNA replication stress	0.950144	0.393926			0.322278	0.705912	0.927594	1.19969	0.92159	1.37893	0.538417	1.17632	1.66548	0.450206	1.06773	1.04758	YJR070C			1	1
YJR105W	ADO1	Adenosine kinase; required for the utilization of S-adenosylmethionine (AdoMet); may be involved in recycling adenosine produced through the methyl cycle	1.14815	0.412882			0.380822	0.757563	1.06607	1.08988	1.33151	1.60224	0.67013	1.5686	1.66281	0.917738	1.54743	1.183	YJR105W	1	1	1	1
YKR043C	SHB17	Sedoheptulose bisphosphatase involved in riboneogenesis; dephosphorylates sedoheptulose 1,7-bisphosphate, which is converted via the nonoxidative pentose phosphate pathway to ribose-5-phosphate; facilitates the conversion of glycolytic intermediates to pentose phosphate units; also has fructose 1,6-bisphosphatase activity but this is probably not biologically relevant, since deletion does not aff…	0.693171	0.276249			0.435096	0.450754	0.710549	0.743506	1.01852	0.396757	1.04583	0.923239	1.051	0.252784	0.562507	0.72751	YKR043C	1			1
YKR076W	ECM4	Omega class glutathione transferase; not essential; similar to Ygr154cp; green fluorescent protein (GFP)-fusion protein localizes to the cytoplasm	0.174206	0.348566			-0.399617	0.407128	0.297505	0.1712	-0.0578188	-0.200111	-0.134123	0.659501	0.371365	0.655293	0.427005	-0.106856	YKR076W	1
YLR231C	BNA5	Kynureninase; required for the de novo biosynthesis of NAD from tryptophan via kynurenine; expression regulated by Hst1p	0.499499	0.510567			0.258425	0.0844768	0.702863	1.02312	0.534667	0.460675	-0.474584	0.552961	0.749398	0.86708	-0.138111	1.37301	YLR231C				1
YML022W	APT1	Adenine phosphoribosyltransferase; catalyzes the formation of AMP from adenine and 5-phosphoribosylpyrophosphate; involved in the salvage pathway of purine nucleotide biosynthesis; APT1 has a paralog, APT2, that arose from the whole genome duplication	0.996166	0.647765			0.478699	0.700829	0.726005	0.967568	1.20607	0.521226	0.508695	1.01751	2.86375	0.669491	1.28666	1.00749	YML022W			1	1
YMR008C	PLB1	Phospholipase B (lysophospholipase) involved in lipid metabolism; required for efficient acyl chain remodeling of newly synthesized phosphatidylethanolamine-derived phosphatidylcholine; required for deacylation of phosphatidylcholine and phosphatidylethanolamine but not phosphatidylinositol; PLB1 has a paralog, PLB3, that arose from the whole genome duplication	0.513672	0.278855			-0.119946	0.231557	0.565442	0.647756	0.538368	0.409945	0.364602	0.785921	0.824292	0.627757	0.87042	0.417949	YMR008C	1			1
YMR311C	GLC8	Regulatory subunit of protein phosphatase 1 (Glc7p); involved in glycogen metabolism and chromosome segregation; proposed to regulate Glc7p activity via conformational alteration; ortholog of the mammalian protein phosphatase inhibitor 2; protein abundance increases in response to DNA replication stress	0.672453	0.32613			0.166668	0.485267	0.780806	0.755861	0.578243	0.611824	0.307853	0.52858	1.47477	0.73058	0.8031	0.845883	YMR311C				1
YNL141W	AAH1	Adenine deaminase (adenine aminohydrolase); converts adenine to hypoxanthine; involved in purine salvage; transcriptionally regulated by nutrient levels and growth phase; Aah1p degraded upon entry into quiescence via SCF and the proteasome	0.674605	0.298768			0.258074	0.409563	0.26402	1.05789	0.987078	0.772985	0.482365	1.05902	0.53222	0.974408	0.74659	0.551043	YNL141W	1
YOL023W	IFM1	Mitochondrial translation initiation factor 2	0.447895	0.309121			0.052301	0.366662	0.159345	0.214233	0.80791	0.369221	0.126741	0.385635	0.852903	0.577467	1.0193	0.443022	YOL023W
YOR317W	FAA1	Long chain fatty acyl-CoA synthetase; activates imported fatty acids with a preference for C12:0-C16:0 chain lengths; functions in long chain fatty acid import; accounts for most acyl-CoA synthetase activity; localized to lipid particles; involved in sphingolipid-to-glycerolipid metabolism; forms ER foci upon DNA replication stress; FAA1 has a paralog, FAA4, that arose from the whole genome dupli…	0.184371	0.454558			0.0354083	-0.126635	0.111848	-0.1074	0.358946	-0.0808595	-0.183615	0.622349	0.230246	0.125947	1.40757	-0.181347	YOR317W	1	1	1	1
YOR323C	PRO2	Gamma-glutamyl phosphate reductase; catalyzes the second step in proline biosynthesis	0.240045	0.256821			0.187771	-0.0091862	0.16629	0.141912	0.492235	-0.114162	0.0482882	0.171037	0.488098	0.23182	0.83453	0.241912	YOR323C		1	1	1
YPL117C	IDI1	Isopentenyl diphosphate:dimethylallyl diphosphate isomerase (IPP isomerase), catalyzes an essential activation step in the isoprenoid biosynthetic pathway; required for viability	1.15639	0.540879			0.401662	0.729549	1.09241	1.16929	1.19755	0.869429	0.575377	1.37389	1.60896	0.804866	1.75355	2.3001	YPL117C	1			1
YPL170W	DAP1	Heme-binding protein involved in regulation of cytochrome P450 protein Erg11p; damage response protein, related to mammalian membrane progesterone receptors; mutations lead to defects in telomeres, mitochondria, and sterol synthesis	0.904555	0.562776			0.340216	0.502055	1.06892	1.15911	1.0444	0.126929	0.701565	1.12656	0.542718	0.514614	1.67193	2.05564	YPL170W			1	1
YGR037C	ACB1	Acyl-CoA-binding protein; transports newly synthesized acyl-CoA esters from fatty acid synthetase (Fas1p-Fas2p) to acyl-CoA-consuming processes; subject to starvation-induced, Grh1p-mediated unconventional secretion; protein abundance increases in response to DNA replication stress	0.900385	0.628849			-0.0717262	0.415408	0.930384	1.1306	1.00279	0.394611	0.582588	1.6536	0.92653	1.25394	2.22765	0.35824	YGR037C	1	1	1	1
Methylation																			Methylation
YLR285W	NNT1	S-adenosylmethionine-dependent methyltransferase; has a role in rDNA silencing and in lifespan determination	1.48148	0.59268			0.608429	1.11458	1.34986	1.81991	1.44287	0.992251	0.837934	2.76519	2.04725	1.26416	1.74274	1.79259	YLR285W
YPL273W	SAM4	S-adenosylmethionine-homocysteine methyltransferase; functions along with Mht1p in the conversion of S-adenosylmethionine (AdoMet) to methionine to control the methionine/AdoMet ratio; SAM4 has a paralog, YMR321C, that arose from a single-locus duplication	0.850623	0.447825			-0.0522257	0.254168	0.75573	0.900932	0.867921	0.660625	0.642832	1.21076	1.22522	1.08816	1.04004	1.61331	YPL273W		1		1
YPR118W	MRI1	5'-methylthioribose-1-phosphate isomerase; catalyzes the isomerization of 5-methylthioribose-1-phosphate to 5-methylthioribulose-1-phosphate in the methionine salvage pathway	0.571003	0.425222			0.307251	0.314081	0.500622	0.611367	0.730453	0.382312	0.225379	0.365985	0.872787	0.483427	0.285658	1.77272	YPR118W
YMR321C		Putative protein of unknown function; proposed to be a palmitoylated membrane protein; YMR321C has a paralog, SAM4, that arose from a single-locus duplication	0.981019	0.505343			0.235657	0.434508	1.06292	0.971765	1.04345	0.535224	0.67661	0.995624	1.95015	0.984993	1.05937	1.82196	YMR321C
YKL155C	RSM22	Mitochondrial ribosomal protein of the small subunit; also predicted to be an S-adenosylmethionine-dependent methyltransferase	0.1724	0.515643			-0.0803934	-0.0413831	-0.126212	-0.0942792	0.526565	0.013585	1.48773	-0.265912	0.608967	-0.386771	0.407591	0.0193171	YKL155C
YIL064W	SEE1	Probable lysine methyltransferase involved in the dimethylation of eEF1A (Tef1p/Tef2p); sequence similarity to S-adenosylmethionine-dependent methyltransferases of the seven beta-strand family; role in vesicular transport	1.34908	0.556774			0.293294	1.05606	1.27549	1.2267	2.3514	1.20856	0.791577	1.29799	1.91793	1.1072	1.78681	1.87588	YIL064W
YGR001C		Putative protein of unknown function with similarity to methyltransferase family members; green fluorescent protein (GFP)-fusion protein localizes to the cytoplasm; required for replication of Brome mosaic virus in S. cerevisiae	1.19173	0.381747			0.615145	1.04344	1.21146	1.2824	1.26962	1.34248	0.651245	1.2012	1.65796	0.899281	1.15092	1.97558	YGR001C				1
YIL110W	HPM1	AdoMet-dependent methyltransferase involved in a novel 3-methylhistidine modification of ribosomal protein Rpl3p; seven beta-strand MTase family member; null mutant exhibits a weak vacuolar protein sorting defect and caspofungin resistance	0.728855	0.309845			0.350942	0.753458	1.09279	1.11035	1.15219	0.463214	0.219364	0.738185	0.825717	0.455818	0.663191	0.921035	YIL110W
YOR021C	SFM1	SPOUT methyltransferase; catalyzes omega-monomethylation of Rps3p on Arg-146; not an essential gene; predicted to be involved in rRNA processing and ribosome biogenesis and in biopolymer catabolism	1.26689	0.577687			0.253858	0.794634	1.19897	1.36495	1.55499	0.895081	0.870957	1.65706	1.63878	1.03989	2.56163	1.3719	YOR021C			1	1
Protein Folding& transport																			Protein Folding& transport
YKL117W	SBA1	Co-chaperone that binds and regulates Hsp90 family chaperones; plays a role in determining prion variants; important for pp60v-src activity in yeast; homologous to the mammalian p23 proteins, and like p23 can regulate telomerase activity; protein abundance increases in response to DNA replication stress	1.29282	0.466182			0.553732	1.30671	0.707975	1.62847	1.52898	1.16707	2.19662	1.09421	1.31168	0.84238	1.38301	1.79299	YKL117W		1	1	1
YNL281W	HCH1	Heat shock protein regulator; binds to Hsp90p and may stimulate ATPase activity; originally identified as a high-copy number suppressor of a HSP90 loss-of-function mutation; GFP-fusion protein localizes to the cytoplasm and nucleus; protein abundance increases in response to DNA replication stress	1.06035	0.482971			0.0989126	1.04855	1.50049	1.21707	0.86998	0.962111	0.459526	0.82185	1.14752	1.87128	1.59836	1.12858	YNL281W	1		1	1
YML078W	CPR3	Mitochondrial peptidyl-prolyl cis-trans isomerase (cyclophilin); catalyzes the cis-trans isomerization of peptide bonds N-terminal to proline residues; involved in protein refolding after import into mitochondria	0.273576	0.47965			-0.0622594	0.0245119	0.0979285	0.338812	0.454763	0.043332	-0.343211	0.609208	1.35598	0.171327	0.82483	-0.232311	YML078W		1	1	1
YNL135C	FPR1	Peptidyl-prolyl cis-trans isomerase (PPIase); binds to the drugs FK506 and rapamycin; also binds to the nonhistone chromatin binding protein Hmo1p and may regulate its assembly or function	1.08028	0.658757			0.0710317	0.528702	1.53929	0.871215	0.918008	0.417233	0.57077	1.95542	1.00401	2.08606	1.90935	1.09223	YNL135C		1		1
YDR519W	FPR2	Membrane-bound peptidyl-prolyl cis-trans isomerase (PPIase); binds to the drugs FK506 and rapamycin; expression pattern suggests possible involvement in ER protein trafficking; relocalizes from nucleus to vacuole upon DNA replication stress	0.811372	0.561388			0.0936931	0.498992	0.799975	0.680269	0.689563	0.177303	0.0448593	1.54627	0.840029	1.28177	1.58002	1.50372	YDR519W				1
YMR184W	ADD37	Protein of unknown function; involved in ER-associated protein degradation; green fluorescent protein (GFP)-fusion protein localizes to the cytoplasm and is induced in response to the DNA-damaging agent MMS; YMR184W is not an essential gene; protein abundance increases in response to DNA replication stress	0.336676	0.330402			-0.0820702	0.0639648	0.175365	0.75999	0.467352	-0.014459	0.474983	0.436402	0.88751	0.0354597	0.127011	0.708602	YMR184W				1
YDR177W	UBC1	Ubiquitin-conjugating enzyme; mediates selective degradation of short-lived and abnormal proteins; plays a role in vesicle biogenesis and ER-associated protein degradation (ERAD); component of the cellular stress response; protein abundance increases in response to DNA replication stress	0.21489	0.149767			0.04477	0.20576	0.331402	0.186132	0.456841	-0.003492	0.158415	0.387971	0.334991	0.184572	0.006018	0.285294	YDR177W	1			1
YOL087C	DUF1	Ubiquitin-binding protein of unknown function; contains one WD40 repeat in a beta-propeller fold; green fluorescent protein (GFP)-fusion protein localizes to the cytoplasm; homolog of human WDR48/UAF1, which is involved in regulating the Fanconi anemia pathway; deletion mutant is sensitive to various chemicals including phenanthroline, sanguinarine, and nordihydroguaiaretic acid	0.201592	0.364605			0.0107648	0.0296315	0.20145	0.0299469	0.114346	-0.00804	0.0934525	0.243586	0.172991	0.227871	1.32066	-0.017551	YOL087C				1
YDR139C	RUB1	Ubiquitin-like protein with similarity to mammalian NEDD8; conjugation (neddylation) substrates include the cullins Cdc53p, Rtt101p, and Cul3p; activated by Ula1p and Uba3p (E1 enzyme pair); conjugation mediated by Ubc12p (E2 enzyme)	0.239537	0.201307			-0.258849	0.177901	0.288697	0.440015	0.251728	0.370353	0.222049	0.167526	0.282706	0.0792608	0.302551	0.550504	YDR139C
YBR164C	ARL1	Soluble GTPase with a role in regulation of membrane traffic; regulates potassium influx; G protein of the Ras superfamily, similar to ADP-ribosylation factor	0.844237	0.399098			0.390532	1.84267	1.01148	0.726718	0.786918	0.539162	0.259958	0.863893	0.970089	0.766371	0.92712	1.04593	YBR164C
YFL045C	SEC53	Phosphomannomutase; involved in synthesis of GDP-mannose and dolichol-phosphate-mannose; required for folding and glycosylation of secretory proteins in the ER lumen	0.562269	0.32086			0.347697	0.314581	0.593902	0.816163	0.94218	0.00397	0.493082	0.401982	1.04708	0.223281	0.89761	0.665698	YFL045C	1	1	1	1
YLR039C	RIC1	Protein involved in retrograde transport to the cis-Golgi network; forms heterodimer with Rgp1p that acts as a GTP exchange factor for Ypt6p; involved in transcription of rRNA and ribosomal protein genes	0.220299	0.337333			-0.0703988	0.0182212	-0.10113	0.177517	0.268867	0.194213	0.160113	1.21247	0.280748	0.182443	0.254792	0.0657243	YLR039C	1
YMR197C	VTI1	Protein involved in cis-Golgi membrane traffic; v-SNARE that interacts with two t-SNARES, Sed5p and Pep12p; required for multiple vacuolar sorting pathways	0.260298	0.301619			0.008297	0.0482013	0.220768	0.0948864	0.100009	-0.140402	-0.0391975	0.482602	0.803704	0.438615	0.693482	0.41261	YMR197C	1
YKL196C	YKT6	Vesicle membrane protein (v-SNARE) with acyltransferase activity; involved in trafficking to and within the Golgi, endocytic trafficking to the vacuole, and vacuolar fusion; membrane localization due to prenylation at the carboxy-terminus	0.268136	0.263864			-0.000315685	0.312429	0.288982	0.346461	0.270784	0.236254	1.02605	0.160244	0.182964	0.113154	0.009493	0.271139	YKL196C	1	1		1
YKR068C	BET3	Hydrophilic protein that acts in conjunction with SNARE proteins in targeting and fusion of ER to Golgi transport vesicles; component of the TRAPP (transport protein particle) complex	0.312122	0.180041			0.166668	0.0413106	0.252482	0.164101	0.299257	0.192478	0.610117	0.647252	0.283379	0.279776	0.436967	0.371681	YKR068C	1
YDR388W	RVS167	Actin-associated protein with roles in endocytosis and exocytosis; interacts with Rvs161p to regulate actin cytoskeleton, endocytosis, and viability following starvation or osmotic stress; recruited to bud tips by Gyl1p and Gyp5p during polarized growth; homolog of mammalian amphiphysin	0.146846	0.148331			0.0771011	0.143958	0.195497	0.0504889	0.184478	-0.032009	-0.107786	0.177332	0.103668	0.211215	0.457939	0.300268	YDR388W	1			1
YGR253C	PUP2	Alpha 5 subunit of the 20S proteasome; involved in ubiquitin-dependent catabolism; human homolog is subunit zeta	0.231207	0.0796718			0.102453	0.294945	0.22188	0.343678	0.2701	0.19897	0.139509	0.262692	0.190339	0.30631	0.129589	0.314021	YGR253C			1	1
Cytoskeleton																			Cytoskeleton
YGL106W	MLC1	Essential light chain for Myo1p; light chain for Myo2p; stabilizes Myo2p by binding to the neck region; interacts with Myo1p, Iqg1p, and Myo2p to coordinate formation and contraction of the actomyosin ring with targeted membrane deposition	0.290442	0.129028			0.303396	0.185706	0.330375	0.28757	0.40431	0.226466	0.192474	0.548181	0.058664	0.250966	0.435949	0.26125	YGL106W			1	1
YOR122C	PFY1	Profilin; binds actin, phosphatidylinositol 4,5-bisphosphate, and polyproline regions; involved in cytoskeleton organization; required for normal timing of actin polymerization in response to thermal stress; protein abundance increases in response to DNA replication stress	0.600859	0.501708			0.287267	0.683983	0.346807	0.75864	0.608927	0.252113	-0.05968	0.700715	0.653729	0.265675	1.96858	0.743546	YOR122C		1	1	1
YGR136W	LSB1	Negative regulator of actin nucleation-promoting factor activity; interacts with Las17p, a homolog of human Wiskott-Aldrich Syndrome protein (WASP), via an N-terminal SH3 domain, and along with PIN3 cooperatively inhibits the nucleation of actin filaments; overexpression blocks receptor-mediated endocytosis; protein increases in abundance and forms nuclear foci in response to DNA replication stre…	0.248957	0.163121			0.0927704	0.197808	0.114048	0.375361	0.339018	0.041878	0.157276	0.659224	0.222557	0.290483	0.274665	0.222399	YGR136W	1			1
YOR265W	RBL2	Protein involved in microtubule morphogenesis; required for protection from excess free beta-tubulin; proposed to be involved the folding of beta-tubulin; similar to mouse beta-tubulin cofactor A; protein abundance increases in response to DNA replication stress	0.51544	0.275581			0.186952	0.504082	0.499209	0.500954	0.416564	0.733013	0.154982	0.598917	0.369956	0.431248	1.22405	0.565357	YOR265W		1	1	1
OTHER																			OTHER
YBR111C	YSA1	Nudix hydrolase family member with ADP-ribose pyrophosphatase activity; shown to metabolize O-acetyl-ADP-ribose to AMP and acetylated ribose 5'-phosphate	0.605961	0.399606			0.416035	1.53577	0.325885	0.619058	0.962973	0.392114	0.464055	0.269104	0.920009	0.013125	0.74888	0.604526	YBR111C		1	1	1
YCL057W	PRD1	Zinc metalloendopeptidase; found in the cytoplasm and intermembrane space of mitochondria; with Cym1p, involved in degradation of mitochondrial proteins and of presequence peptides cleaved from imported proteins; protein abundance increases in response to DNA replication stress	0.427929	0.198731			0.28014	0.424588	0.25469	0.60061	0.524922	0.438975	0.0869614	0.184774	0.777974	0.581217	0.574017	0.406275	YCL057W		1	1
YER057C	HMF1	Member of the p14.5 protein family; functionally complements Mmf1p function when targeted to mitochondria; heat shock inducible; high-dosage growth inhibitor; forms a homotrimer in vitro; HMF1 has a paralog, MMF1, that arose from the whole genome duplication	0.800648	0.444501			0.241172	0.649413	1.60195	0.889672	0.69254	0.428791	0.196947	1.22377	0.988852	0.581939	1.43053	0.682188	YER057C			1	1
YJR074W	MOG1	Conserved nuclear protein that stimulates nucleotide release from Gsp1p; involved in nuclear protein import; nucleotide release is inhibited by Yrb1p	1.02066	0.299568			0.797213	0.782659	1.49957	0.799749	1.22172	1.38779	0.607855	1.44878	0.816216	0.851398	0.97845	1.05646	YJR074W
YLR059C	REX2	3'-5' RNA exonuclease; involved in 3'-end processing of U4 and U5 snRNAs, 5S and 5.8S rRNAs, and RNase P and RNase MRP RNA; localized to mitochondria and null suppresses escape of mtDNA to nucleus in yme1 yme2 mutants; RNase D exonuclease	-0.0862941	0.33703			-0.545132	-0.0283177	0.0551955	0.0582034	-0.118454	-0.397765	-0.276176	0.629129	0.111361	-0.59789	0.130636	-0.0563209	YLR059C	1
YMR305C	SCW10	Cell wall protein with similarity to glucanases; may play a role in conjugation during mating based on mutant phenotype and its regulation by Ste12p; SWC10 has a paralog, SCW4, that arose from the whole genome duplication	0.618088	0.562748			-0.222399	0.0648662	0.465956	0.559505	0.263901	0.459018	0.279716	1.17629	0.842967	1.08076	1.88301	0.563468	YMR305C				1
YGL094C	PAN2	Essential subunit of the Pan2p-Pan3p poly	0.125967	0.140503			0.137	0.108	-0.0443	0.0453	0.442	0.0101	0.0541	0.351	0.105	0.0372	0.176	0.0902	YGL094C	1
YNL039W	BDP1	Essential subunit of RNA polymerase III transcription factor (TFIIIB); TFIIIB is involved in transcription of genes encoding tRNAs, 5S rRNA, U6 snRNA, and other small RNAs	0.103086	0.195189			0.0343913	0.0705681	0.105637	0.123971	0.0557784	0.027615	-0.073085	0.0768803	0.052106	0.670696	-0.09862	0.191089	YNL039W			1	1
YOL094C	RFC4	Subunit of heteropentameric Replication factor C (RF-C); which is a DNA binding protein and ATPase that acts as a clamp loader of the proliferating cell nuclear antigen (PCNA) processivity factor for DNA polymerases delta and epsilon; relocalizes to the cytosol in response to hypoxia	0.080901	0.152461			-0.0151642	0.0329811	0.259877	0.0246563	0.0713729	-0.0331198	-0.0668093	0.450167	0.003824	-0.0459982	0.206002	0.0830232	YOL094C				1
Unknown																			Unknown
YCR051W		Putative protein of unknown function; green fluorescent protein (GFP)-fusion protein localizes to the cytoplasm and nucleus; contains ankyrin (Ank) repeats; YCR051W is not an essential gene	1.20763	0.375127			0.641792	1.02286	1.09029	1.5779	1.29073	1.00902	0.802526	1.13932	1.66822	1.15372	1.11091	1.9843	YCR051W	1			1
YNL010W		Putative protein of unknown function with similarity to phosphoserine phosphatases; green fluorescent protein (GFP)-fusion protein localizes to the cytoplasm and nucleus; homozygous diploid mutant shows an increase in glycogen accumulation	0.158565	0.371875			0.148878	-0.0773899	0.0964555	0.307602	0.703154	-0.109258	-0.395944	0.0064728	0.866173	0.486885	0.061102	-0.191352	YNL010W		1	1	1
YER034W		Protein of unknown function; non-essential gene; expression induced upon calcium shortage; protein abundance increases in response to DNA replication stress	0.336773	0.523684			-0.101234	-0.0340067	1.88384	0.168538	0.174483	0.042979	0.296656	0.595506	0.309044	0.391173	0.247052	0.0672405	YER034W
YGL159W		Putative protein of unknown function; deletion mutant has no detectable phenotype	0.0683725	0.198973			0.0277186	0.0087796	0.255175	0.179141	0.313654	-0.228907	-0.186239	-0.0013401	0.261997	0.134237	-0.21665	0.272903	YGL159W				1
YGL242C		Putative protein of unknown function; deletion mutant is viable	1.31778	0.406099			0.754223	1.41703	1.83065	1.56315	1.14784	0.644265	0.694631	1.58555	1.57163	1.59286	1.57675	1.43478	YGL242C				1
YJL055W		Putative protein of unknown function; proposed to be involved in the metabolism of purine and pyrimidine base analogues; deletion mutants are sensitive to HAP and AHA; overexpression confers resistance to 5-FOA and 5-FU	0.78724	0.521572			0.549745	0.650055	0.579943	0.751755	1.27212	1.49856	0.122003	0.331124	1.49639	-0.070796	1.1722	1.09378	YJL055W	1			1
YJL123C	MTC1	Protein of unknown function that may interact with ribosomes; green fluorescent protein (GFP)-fusion protein localizes to the cytoplasm and to COPI-coated vesicles (early Golgi); mtc1 is synthetically lethal with cdc13-1	0.0782362	0.282738			-0.0325875	-0.119553	-0.0804595	-0.0606583	0.104536	0.898981	-0.159291	0.217233	-0.02161	-0.0592912	0.128428	0.123106	YJL123C				1
YML108W		Protein of unknown function; structure defines a new subfamily of the split beta-alpha-beta sandwiches; green fluorescent protein (GFP)-fusion protein localizes to the cytoplasm and nucleus; YML108W is not an essential gene; relative distribution to the nucleus increases upon DNA replication stress	0.829278	0.412364			0.35837	0.805441	0.665435	1.13363	0.698061	0.642494	0.373286	0.980179	1.62674	0.346098	0.88092	1.44068	YML108W				1
YLR301W	HRI1	Protein of unknown function that interacts with Sec72p and Hrr25p	1.03207	0.483027			0.445051	0.953203	0.975894	1.23228	1.43688	0.465079	0.550443	1.88758	1.69321	0.641622	0.79403	1.30951	YLR301W		1	1	1
YKR074W	AIM29	Putative protein of unknown function; epitope-tagged protein localizes to the cytoplasm; YKR074W is not an essential gene; null mutant displays elevated frequency of mitochondrial genome loss	0.301483	0.240634			0.143266	0.322522	0.224004	0.0729134	0.587145	0.082142	0.832788	0.23517	0.538192	0.0187947	0.281827	0.279025	YKR074W			1	1
YGR250C		Putative RNA binding protein; localizes to stress granules induced by glucose deprivation; interacts with Rbg1p in a two-hybrid assay; protein abundance increases in response to DNA replication stress	0.0927002	0.207637			-0.104236	0.0264348	0.0589775	-0.0737423	0.114023	-0.0877343	-0.130074	0.137274	0.20133	0.265908	0.617832	0.0864103	YGR250C				1

## Sheet: Sheet2
YBL055C	YBL055C
YBL064C	YBL064C
YBR109C	YBR109C
YBR111C	YBR111C
YBR164C	YBR164C
YCL026C-B	YCL026C-B
YCL035C	YCL035C
YCL057W	YCL057W
YCR051W	YCR051W
YCR053W	YCR053W
YDL106C	YDL106C
YDL125C	YDL125C
YDL166C	YDL166C
YDR139C	YDR139C
YDR177W	YDR177W
YDR388W	YDR388W
YDR400W	YDR400W
YDR519W	YDR519W
YEL038W	YEL038W
YEL047C	YEL047C
YER034W	YER034W
YER057C	YER057C
YER062C	YER062C
YFL045C	YFL045C
YFL047W	YFL047W
YGL094C
YGL106W	YGL106W
YGL159W	YGL159W
YGL242C	YGL242C
YGR001C	YGR001C
YGR037C	YGR037C
YGR136W	YGR136W
YGR208W	YGR208W
YGR209C	YGR209C
YGR234W	YGR234W
YGR250C	YGR250C
YGR253C	YGR253C
YHR201C	YHR201C
YIL064W	YIL064W
YIL110W	YIL110W
YIL145C	YIL145C
YJL055W	YJL055W
YJL123C	YJL123C
YJR070C	YJR070C
YJR074W	YJR074W
YJR104C	YJR104C
YJR105W	YJR105W
YKL056C	YKL056C
YKL117W	YKL117W
YKL155C	YKL155C
YKL196C	YKL196C
YKR043C	YKR043C
YKR066C	YKR066C
YKR068C	YKR068C
YKR074W	YKR074W
YKR076W	YKR076W
YLR039C	YLR039C
YLR043C	YLR043C
YLR059C	YLR059C
YLR109W	YLR109W
YLR146C	YLR146C
YLR231C	YLR231C
YLR285W	YLR285W
YLR301W	YLR301W
YML022W	YML022W
YML078W	YML078W
YML108W	YML108W
YMR008C	YMR008C
YMR184W	YMR184W
YMR197C	YMR197C
YMR305C	YMR305C
YMR311C	YMR311C
YMR321C	YMR321C
YNL010W	YNL010W
YNL039W	YNL039W
YNL135C	YNL135C
YNL141W	YNL141W
YNL281W	YNL281W
YOL023W	YOL023W
YOL087C	YOL087C
YOL094C	YOL094C
YOR021C	YOR021C
YOR122C	YOR122C
YOR265W	YOR265W
YOR317W	YOR317W
YOR323C	YOR323C
YPL059W	YPL059W
YPL117C	YPL117C
YPL170W	YPL170W
YPL273W	YPL273W
YPR069C	YPR069C
YPR118W	YPR118W
