# Supplementary material for: Quantitative proteomic analysis reveals posttranslational responses to aneuploidy in yeast
Source: eLife journal article supplement (doi:10.7554/elife.03023), 2014-07-29
Supplement: supp [file elife-03023-supp-v1.zip › elife_poa_e03023_Figure_7_source_data_1.xlsx]

## Sheet: TMT ubp6
TMT PROTEOME
				Count	3646	3646	3646	3646	3646	3671	3671	3671	3671	3670	3848	3848	3847	3847	3847	2767
				Median	1.265e-05	0.0009096	0.0120365	0.0085703	0.00656285	-0.00073705	0.00637326	0.00968154	0.0140305	0.0292579	-0.0006135	0.0164045	0.0151303	0.0210815	0.013277	0.798571
				Mean	0.00822662	0.0313777	0.0627258	0.0198277	0.0519294	0.0076048	0.0600671	0.0409163	0.0583533	0.0263326	0.00766812	0.042204	0.0364746	0.0438103	0.0194076	0.729729
				STDEV	0.0994589	0.226234	0.369005	0.383838	0.33764	0.102979	0.286138	0.380945	0.364209	0.52184	0.116461	0.458773	0.35928	0.57046	0.395477	0.478059
				Coverage	0.718282	0.718282	0.718282	0.718282	0.718282	0.723207	0.723207	0.723207	0.723207	0.72301	0.758077	0.758077	0.75788	0.75788	0.75788	0.545114
ORF	Gene Symbol	description	Chromosome	Wodak Complexes	WT/WT 1	Dis I/WT	Dis II/WT	Dis V/WT	Dis VIII/WT	WT/WT 2	Dis IX/WT	Dis X/WT	Dis XI/WT	Dis XII/WT	WT/WT 3	Dis XIII/WT	Dis XIV/WT	Dis XV/WT	Dis XVI	Disomic Ratio
YAL001C	TFC3	Largest of six subunits of the RNA polymerase III transcription initiation factor complex (TFIIIC); part of the TauB domain of TFIIIC that binds DNA at the BoxB promoter sites of tRNA and similar genes; cooperates with Tfc6p in DNA binding	1	transcription factor TFIIIC complex	0.197659	0.643774	0.117642	0.222251	0.00098955	-0.0555995	0.0251508	0.0409678	-0.386208	-0.385224	0.0133195	0.180967	-0.0333979	-0.109177	0.280331	0.643774
YAL003W	EFB1	Translation elongation factor 1 beta; stimulates nucleotide exchange to regenerate EF-1 alpha-GTP for the next elongation cycle; part of the EF-1 complex, which facilitates binding of aminoacyl-tRNA to the ribosomal A site	1	eEF1	0.0047346	0.725513	-0.225512	-0.452076	-0.091552	-0.00281895	-0.0295549	-0.260303	-0.154943	-0.270921	0.0132495	-0.406188	-0.226886	-0.889836	-0.287602	0.725513
YAL005C	SSA1	ATPase involved in protein folding and NLS-directed nuclear transport; member of HSP70 family; forms chaperone complex with Ydj1p; localized to nucleus, cytoplasm, and cell wall; 98% identical with Ssa2p, but subtle differences between the two proteins provide functional specificity with respect to propagation of yeast [URE3] prions and vacuolar-mediated degradations of gluconeogenesis enzymes; g…	1		-0.0432519	0.61634	0.113553	-0.102715	0.0838244	-0.0665296	-0.174252	0.288097	-0.169383	-0.63361	-0.158208	0.030384	0.0350216	0.130744	0.335535	0.61634
YAL007C	ERP2	Protein that forms a heterotrimeric complex with Erp1p, Emp24p, and Erv25p; member, along with Emp24p and Erv25p, of the p24 family involved in ER to Golgi transport and localized to COPII-coated vesicles	1	COPII	-0.146289	0.517516	-0.095613	-0.234355	-0.121054	-0.0771947	-0.103919	-0.181309	0.177128	-0.0721295	-0.0399275	-0.202163	-0.286334	-0.764093	-0.009073	0.517516
YAL011W	SWC3	Protein of unknown function, component of the SWR1 complex, which exchanges histone variant H2AZ (Htz1p) for chromatin-bound histone H2A; required for formation of nuclear-associated array of smooth endoplasmic reticulum known as karmellae	1	Swr1p complex	-0.0011663	0.562092	0.0553703	-0.400949	-0.367092						0.0169585	-0.015569	0.159298	-0.204612	0.096507	0.562092
YAL012W	CYS3	Cystathionine gamma-lyase, catalyzes one of the two reactions involved in the transsulfuration pathway that yields cysteine from homocysteine with the intermediary formation of cystathionine; protein abundance increases in response to DNA replication stress	1		-0.0659375	0.850691	-0.218727	-0.375439	-0.0646246	-0.0632057	-0.250312	-0.113223	-0.300971	-0.216609	0.0036415	-0.0512	-0.0091655	-0.43735	-0.364204	0.850691
YAL013W	DEP1	Transcriptional modulator involved in regulation of structural phospholipid biosynthesis genes and metabolically unrelated genes, as well as maintenance of telomeres, mating efficiency, and sporulation	1	Rpd3L complex	-0.0401254	-0.0167127	-0.168484	-0.741335	-0.13156	0.0211135	-0.0605685	-0.311759	-0.37193	-0.253665	-0.0036635	-0.193499	-0.29104	-0.0319785	-0.0541133	-0.0167127
YAL014C	SYN8	Endosomal SNARE related to mammalian syntaxin 8	1		-0.221018	0.965576	-0.033604	-0.16357	-0.108229	-0.244167	0.0394701	-0.198754	0.165543	-0.0775243	-0.133336	0.112164	-0.22534	0.222104	0.225165	0.965576
YAL015C	NTG1	DNA N-glycosylase and apurinic/apyrimidinic (AP) lyase; involved in base excision repair; acts in both nucleus and mitochondrion; creates a double-strand break at mtDNA origins that stimulates replication in response to oxidative stress; NTG1 has a paralog, NTG2, that arose from the whole genome duplication	1		-0.0219696	1.06012	0.183636	0.0235608	0.209091	0.00186125	0.230216	0.131863	0.606985	0.590625	0.274977	0.064936	0.779217	0.506409	0.54053	1.06012
YAL016W	TPD3	Regulatory subunit A of the heterotrimeric protein phosphatase 2A (PP2A), which also contains regulatory subunit Cdc55p and either catalytic subunit Pph21p or Pph22p; required for cell morphogenesis and transcription by RNA polymerase III	1	protein phosphatase type 2A complex (Cdc55p), protein phosphatase type 2A complex (Rts1p)	0.036102	1.04539	0.198419	0.419075	0.0993747	-0.0133448	-0.0573039	0.0224101	0.0203371	0.11234	0.0787301	0.04832	0.234406	0.333674	0.079053	1.04539
YAL017W	PSK1	PAS domain-containing serine/threonine protein kinase; coordinately regulates protein synthesis and carbohydrate metabolism and storage in response to a unknown metabolite that reflects nutritional status; PSK1 has a paralog, PSK2, that arose from the whole genome duplication	1		0.296688	0.979426	-0.0564188	0.0696238	0.183579	0.0100096	0.160259	0.224151	0.211585	0.18255	-0.0363925	0.386691	0.252172	0.628745	-0.104664	0.979426
YAL019W	FUN30	Snf2p family member with ATP-dependent chromatin remodeling activity; has a role in silencing at the mating type locus, telomeres and centromeres; enriched at centromeres and is required for correct chromatin structure around centromeres, as well as at the boundary element of the silent HMR; involved in double-strand break (DSB) response; potential Cdc28p substrate; authentic, non-tagged protein …	1		0.0042019	0.995046	0.0799948	-0.107227	0.309543	-0.0733326	-0.0581631	0.0978107	0.0453787	0.215428	0.0616725	-0.019163	0.132338	-0.0855125	-0.023326	0.995046
YAL020C	ATS1	Protein required, with Elongator complex, Kti11p, and Kti12p, for modification of wobble nucleosides in tRNA; has a potential role in regulatory interactions between microtubules and the cell cycle	1		0.120064	1.27708	-0.373916	0.0580828	-0.189858	-0.557976	-0.722943	-0.349049	-0.546293	-0.656366	0.0772562	0.255605	-0.167737	-0.187457	-0.155588	1.27708
YAL021C	CCR4	Component of the CCR4-NOT transcriptional complex, which is involved in regulation of gene expression; component of the major cytoplasmic deadenylase, which is involved in mRNA poly(A) tail shortening	1	CCR4-NOT core complex, Cdc73p/Paf1p complex	-0.120473	0.966646	0.118618	0.018375	0.0575058	0.0958924	0.0382566	0.0530046	0.0551855	0.143245	-0.0144825	0.143846	0.0405649	0.17368	0.121452	0.966646
YAL023C	PMT2	Protein O-mannosyltransferase of the ER membrane; transfers mannose residues from dolichyl phosphate-D-mannose to protein serine/threonine residues; involved in ER quality control; acts in a complex with Pmt1p, can instead interact with Pmt5p; antifungal drug target; PMT2 has a paralog, PMT3, that arose from the whole genome duplication	1	Protein O-mannosyltransferase(Pmt1p/Pmt2p)	-0.016666	0.997286	-0.417542	-0.08673	0.00672705	0.0453776	0.0469161	-0.206689	0.0463266	-0.037532	0.0232995	0.035442	-0.220699	-0.545559	0.16006	0.997286
YAL024C	LTE1	Protein similar to GDP/GTP exchange factors but without detectable GEF activity; required for asymmetric localization of Bfa1p at daughter-directed spindle pole bodies and for mitotic exit at low temperatures	1	Kel1p/Kel2p/Lte1p complex	0.119806	1.00651	0.257051	0.197493	0.285227	-0.123361	-0.119775	0.0710869	0.213127	0.0776654	-0.0994185	-0.061129	-0.104242	0.0323185	0.008174	1.00651
YAL025C	MAK16	Essential nuclear protein, constituent of 66S pre-ribosomal particles; required for maturation of 25S and 5.8S rRNAs; required for maintenance of M1 satellite double-stranded RNA of the L-A virus	1		-0.0625769	0.823987	-0.0353441	-0.117885	-0.0113465	0.0454637	0.139577	-0.202597	-0.308331	-0.0476694	-0.110904	-0.018927	-0.10532	-0.7186	-0.018581	0.823987
YAL026C	DRS2	Aminophospholipid translocase (flippase) that maintains membrane lipid asymmetry in post-Golgi secretory vesicles; contributes to clathrin-coated vesicle formation and endocytosis; mutations in human homolog ATP8B1 result in liver disease	1		-0.1143	0.823789	0.126093	0.103972	0.0805666	-0.0324805	0.0822016	-0.023713	0.0513545	-0.245084	0.0091015	0.219227	0.0549892	-0.0496075	0.175652	0.823789
YAL029C	MYO4	Type V myosin motor involved in actin-based transport of cargos; required for mRNA transport, including ASH1 mRNA, and facilitating the growth and movement of ER tubules into the growing bud along with She3p; MYO4 has a paralog, MYO2, that arose from the whole genome duplication	1		0.0988868	0.938717	0.137981	-0.212388	0.0821313	0.142109	-0.195046	0.202014	-0.0300851	0.169387	-0.101921	-0.202149	-0.0236249	0.0700865	-0.358071	0.938717
YAL030W	SNC1	Vesicle membrane receptor protein (v-SNARE); involved in the fusion between Golgi-derived secretory vesicles with the plasma membrane; proposed to be involved in endocytosis; member of the synaptobrevin/VAMP family of R-type v-SNARE proteins; SNC1 has a paralog, SNC2, that arose from the whole genome duplication	1	SNARE complex	0.0750557	1.28455	0.659	0.950153	0.542934	0.0574117	-0.0016733	0.213999	0.201923	0.162225	0.236285	-0.07814	0.521336	0.282155	0.171684	1.28455
YAL031C	GIP4	Cytoplasmic Glc7-interacting protein whose overexpression relocalizes Glc7p from the nucleus and prevents chromosome segregation; potential Cdc28p substrate	1		0.0487025	1.13145	-0.0107162	0.195529	-0.194896	0.0617223	0.018855	-0.0839111	0.0511259	0.0890853	0.0627035	0.143071	-0.138854	0.448745	0.154833	1.13145
YAL032C	PRP45	Protein required for pre-mRNA splicing; associates with the spliceosome and interacts with splicing factors Prp22p and Prp46p; orthologous to human transcriptional coactivator SKIP and can activate transcription of a reporter gene	1		-0.0515216	0.387887	-0.0317018	0.233177	-0.0373228	0.0525069	-0.0364882	-0.196557	-0.154164	0.101714	0.0787809	0.086636	-0.236177	0.0446155	0.213034	0.387887
YAL033W	POP5	Subunit of both RNase MRP and nuclear RNase P; RNase MRP cleaves pre-rRNA, while nuclear RNase P cleaves tRNA precursors to generate mature 5' ends and facilitates turnover of nuclear RNAs	1	nucleolar ribonuclease P complex, ribonuclease MRP complex	0.0209292	0.193971	-0.0912547	-0.151577	0.463002	-0.0898166	-0.308689	-0.153093	-0.115632	-0.183154	-0.428544	0.011452	-0.886924	-0.165711	-0.205259	0.193971
YAL034W-A	MTW1	Essential component of the MIND kinetochore complex (Mtw1p Including Nnf1p-Nsl1p-Dsn1p) which joins kinetochore subunits contacting DNA to those contacting microtubules; critical to kinetochore assembly	1	MIND complex	0.162121	0.895512	-0.139752	0.0805388	-0.37322	0.180907	0.0253018	0.0379996	-0.317636	-0.039591	0.121903	-0.04827	-0.343339	0.21742	0.096985	0.895512
YAL035W	FUN12	GTPase required for general translation initiation; promotes Met-tRNAiMet binding to ribosomes and ribosomal subunit joining; protein abundance increases in response to DNA replication stress; homolog of bacterial IF2	1		-0.0643848	0.88384	-0.108809	-0.143194	-0.0588835	-0.0714986	-0.14323	0.0395088	-0.0633575	0.0936543	-0.0061215	-0.079582	0.14945	-0.376523	-0.170032	0.88384
YAL036C	RBG1	Member of the DRG family of GTP-binding proteins; associates with translating ribosomes; interacts with Tma46p, Ygr250cp, Gir2p and Yap1p via two-hybrid	1		-0.0143455	0.520823	-0.0705405	-0.0489245	-0.10183	-0.0170872	0.0584765	0.0686429	0.00483855	0.0613486	-0.174103	-0.142349	-0.406948	-0.264765	-0.0807952	0.520823
YAL038W	CDC19	Pyruvate kinase; functions as a homotetramer in glycolysis to convert phosphoenolpyruvate to pyruvate, the input for aerobic (TCA cycle) or anaerobic (glucose fermentation) respiration; CDC19 has a paralog, PYK2, that arose from the whole genome duplication	1		-0.0164943	0.911548	-0.266226	-0.241804	-0.0920168	0.00977895	0.13959	-0.196187	-0.1315	0.178036	-0.0208115	-0.335069	-0.182091	-0.93834	-0.242642	0.911548
YAL039C	CYC3	Cytochrome c heme lyase (holocytochrome c synthase), attaches heme to apo-cytochrome c (Cyc1p or Cyc7p) in the mitochondrial intermembrane space; human ortholog may have a role in microphthalmia with linear skin defects (MLS)	1		0.189852	1.04562	0.117008	-0.388421	0.386978	0.00934995	0.0303656	-0.358036	0.464716	0.285311						1.04562
YAL041W	CDC24	Guanine nucleotide exchange factor (GEF or GDP-release factor) for Cdc42p; required for polarity establishment and maintenance, and mutants have morphological defects in bud formation and shmooing	1	Cdc24p/Far1p/Gbetagamma protein complex	0.13299	1.02422	0.0681045	0.14552	0.150446	0.090644	0.100417	0.00880382	0.164504	0.0340327	0.0440025	0.062944	0.0416003	0.188528	-0.020954	1.02422
YAL042W	ERV46	Protein localized to COPII-coated vesicles, forms a complex with Erv41p; involved in the membrane fusion stage of transport	1	COPII, Erv41p/Erv46p complex	0.111271	0.69154	0.147891	0.0415068	0.257924	-0.14615	-0.21253	0	-0.0265857	-0.411624	-0.12741	0.077036	0.0304709	-0.0731215	0.29312	0.69154
YAL043C	PTA1	Subunit of holo-CPF, a multiprotein complex and functional homolog of mammalian CPSF, required for the cleavage and polyadenylation of mRNA and snoRNA 3' ends; involved in pre-tRNA processing; binds to the phosphorylated CTD of RNAPII	1	mRNA cleavage and polyadenylation specificity factor complex	-0.0168296	0.544762	-0.00844862	0.0224589	-0.131452	0.100485	0.0673618	0.193504	0.120276	0.252298	0.0498475	0.076375	0.271889	0.0944905	0.219795	0.544762
YAL044C	GCV3	H subunit of the mitochondrial glycine decarboxylase complex, required for the catabolism of glycine to 5,10-methylene-THF; also required for all protein lipoylation; expression is regulated by levels of 5,10-methylene-THF	1	glycine cleavage complex	0.0332491	1.18969	-0.0400476	0.656258	1.05123	-0.163174	0.608758	-0.0830384	1.10625	0.0977632	-0.0276175	-0.156443	0.613904	0.968375	1.31499	1.18969
YAL044W-A	YAL044W-A	Putative protein of unknown function; similar to S. pombe uvi31 which is a putative DNA repair protein	1		0.107379	0.878719	0.266355	-0.0307944	0.324147	0.0655441	0.0119712	0.0796359	0.304781	0.328072	-0.0624865	0.041061	-0.314455	-0.271763	-0.0547311	0.878719
YAL046C	AIM1	Protein involved in mitochondrial function or organization; null mutant displays elevated frequency of mitochondrial genome loss	1		-0.0748644	1.04198	0.0493697	-0.200547	0.188799						0.119833	0.057858	0.061675	-0.0308595	-0.008116	1.04198
YAL047C	SPC72	Component of the cytoplasmic Tub4p (gamma-tubulin) complex, binds spindle pole bodies and links them to microtubules; has roles in astral microtubule formation and stabilization	1	SPB components	-0.0661493	0.771083	-0.0117145	-0.0799249	-0.100397	-0.121536	0.0531688	-0.10147	0.0718227	0.0414161	0.0864255	-0.212847	0.167249	-0.0687285	0.086739	0.771083
YAL048C	GEM1	Outer mitochondrial membrane GTPase, subunit of the ERMES complex; potential regulatory subunit of the ERMES complex that links the ER to mitochondria and may promote inter-organellar calcium and phospholipid exchange as well as coordinating mitochondrial DNA replication and growth; cells lacking Gem1p contain collapsed, globular, or grape-like mitochondria; ortholog of metazoan Miro GTPases	1							0.00785055	-0.0646841	0.0926371	-0.0693726	0.237113	0.113821	0.087396	0.410379	0.117036	0.254338
YAL049C	AIM2	Cytoplasmic protein involved in mitochondrial function or organization; null mutant displays reduced frequency of mitochondrial genome loss; potential Hsp82p interactor	1		0.0039502	1.51067	-0.441403	0.334299	0.152125	0.0948482	0.419809	0.252249	0.119425	-0.357361	0.0593325	0.452228	0.20839	0.270248	0.455796	1.51067
YAL051W	OAF1	Oleate-activated transcription factor; acts alone and as a heterodimer with Pip2p; activates genes involved in beta-oxidation of fatty acids and peroxisome organization and biogenesis; OAF1 has a paralog, PIP2, that arose from the whole genome duplication	1	OAF complex	0.0054325	1.20691	-0.0705593	0.268854	-0.0450525	0.0497341	-0.0615754	0.0137466	0.0527676	0.226857	0.129617	0.03753	-0.151297	0.0088175	-0.129341	1.20691
YAL053W	FLC2	Putative FAD transporter; required for uptake of FAD into endoplasmic reticulum; involved in cell wall maintenance; FLC2 has a paralog, YOR365C, that arose from the whole genome duplication	1		0.0101003	0.801319	0.154288	-0.450062	0.0722202	0.0186144	0.172746	0.23494	0.343089	0.725191	0.0263065	-0.151091	0.188163	0.847236	0.452151	0.801319
YAL054C	ACS1	Acetyl-coA synthetase isoform which, along with Acs2p, is the nuclear source of acetyl-coA for histone acetylation; expressed during growth on nonfermentable carbon sources and under aerobic conditions	1												0.391736	0.943209	0.492424	2.56396	1.41765
YAL055W	PEX22	Putative peroxisomal membrane protein required for import of peroxisomal proteins, functionally complements a Pichia pastoris pex22 mutation	1												0.179103	0.320859	0.500835	0.542409	0.180426
YAL056W	GPB2	Multistep regulator of cAMP-PKA signaling; inhibits PKA downstream of Gpa2p and Cyr1p, thereby increasing cAMP dependency; inhibits Ras activity through direct interactions with Ira1p/2p; regulated by G-alpha protein Gpa2p; GPB2 has a paralog, GPB1, that arose from the whole genome duplication	1		0.0782746	1.10174	-0.104659	-0.12047	-0.060129	0.085628	0.0497219	-0.028755	0.0131277	-0.238049	-0.0053485	-1.11525	-0.0847181	0.0301185	-1.24784	1.10174
YAL058W	CNE1	Calnexin; integral membrane ER chaperone involved in folding and quality control of glycoproteins; chaperone activity is inhibited by Mpd1p, with which Cne1p interacts; 24% identical to mammalian calnexin; Ca+ binding not yet shown in yeast	1		0.103469	1.02483	0.0878407	-0.2551	0.161019	0.250099	0.062274	0.323951	-0.153133	0.425681	0.19756	-0.160217	0.0027106	-0.313701	-0.015713	1.02483
YAL059W	ECM1	Pre-ribosomal factor involved in 60S ribosomal protein subunit export; associates with the pre-60S particle; shuttles between the nucleus and cytoplasm	1		-0.0996884	0.841735	-0.189865	-0.46949	-0.0245213	-0.00937215	-0.112382	-0.125758	0.0151647	0.0846078	-0.115895	-0.023652	0.0163346	-0.498723	0.022711	0.841735
YAL060W	BDH1	NAD-dependent (R,R)-butanediol dehydrogenase, catalyzes oxidation of (R,R)-2,3-butanediol to (3R)-acetoin, oxidation of meso-butanediol to (3S)-acetoin, and reduction of acetoin; enhances use of 2,3-butanediol as an aerobic carbon source	1		0.0004797	1.03811	-0.686846	0.410185	-0.135866	-0.0827116	-0.0346937	-1.23314	0.207428	-0.0428255	0.146893	-0.016154	0.101465	-0.0343505	-0.383223	1.03811
YAL062W	GDH3	NADP(+)-dependent glutamate dehydrogenase; synthesizes glutamate from ammonia and alpha-ketoglutarate; rate of alpha-ketoglutarate utilization differs from Gdh1p; expression regulated by nitrogen and carbon sources; GDH3 has a paralog, GDH1, that arose from the whole genome duplication	1		-0.118895	0.470381	0.455652	-0.0548662	0.148454	0.0182119	-0.0926502	-0.420582	-0.642772	-0.750309	-0.047144	-0.627426	-0.176009	-1.02393	-1.04738	0.470381
YAR002C-A	ERP1	Member of the p24 family involved in ER to Golgi transport; forms heterotrimeric complex with Erp2p, Emp24p, and Erv25p; localized to COPII-coated vesicles; ERP1 has a paralog, ERP6, that arose from the whole genome duplication	1	COPII	-0.0068152	0.250093	-0.156591	-0.35011	-0.0757027	0.0476578	-0.127745	-0.0244816	0.0597285	0.272053	0.0751153	-0.185938	-0.235042	-0.381426	0.05804	0.250093
YAR002W	NUP60	FG-nucleoporin component of central core of the nuclear pore complex (NPC); contributes directly to nucleocytoplasmic transport and maintenance of the NPC permeability barrier and is involved in gene tethering at the nuclear periphery; both NUP1 and NUP60 are homologous to human NUP153	1		-0.0228517	0.434016	-0.251432	-0.141957	-0.153445	0.0418715	-0.175381	-0.14917	-0.282954	0.189375	0.0327655	-0.266806	0.0196671	-0.280444	0.030223	0.434016
YAR003W	SWD1	Subunit of the COMPASS (Set1C) complex, which methylates histone H3 on lysine 4 and is required in transcriptional silencing near telomeres; WD40 beta propeller superfamily member with similarity to mammalian Rbbp7	1	COMPASS complex	-0.0537075	0.345053	0.319001	-0.13758	0.182707	0.0719694	0.0762259	0.191654	0.271837	0.128265	-0.0202695	0.168148	-0.0910941	0.274345	0.05643	0.345053
YAR007C	RFA1	Subunit of heterotrimeric Replication Protein A (RPA), which is a highly conserved single-stranded DNA binding protein involved in DNA replication, repair, and recombination	1	DNA replication factor A complex	-0.0168235	0.857129	0.126121	0.0516758	-0.156045	-0.0253258	0.0926034	-0.0571167	0.0316527	-0.119983	-0.0084285	-0.15139	0.0166096	-0.0263065	-0.003738	0.857129
YAR008W	SEN34	Subunit of the tRNA splicing endonuclease, which is composed of Sen2p, Sen15p, Sen34p, and Sen54p; Sen34p contains the active site for tRNA 3' splice site cleavage and has similarity to Sen2p and to Archaeal tRNA splicing endonuclease	1	tRNA-intron endonuclease complex	-0.136317	0.828995	-0.207746	0.34288	-0.00372049	-0.0754896	-0.121668	-0.146866	0.207986	0.924487	0.255034	-0.63777	0.138444	-0.28563	0.082261	0.828995
YAR014C	BUD14	Protein involved in bud-site selection, Bud14p-Glc7p complex is a cortical regulator of dynein; inhibitor of the actin assembly factor Bnr1p (formin); diploid mutants display a random budding pattern instead of the wild-type bipolar pattern	1	Bud14p/Glc7p complex	-0.0509145	0.728633	-0.279908	0.0112061	0.0155533	-0.0306823	-0.0435556	-0.120438	0.158501	-0.153238	0.0259325	-0.224965	0.0945546	0.104087	-0.0642102	0.728633
YAR018C	KIN3	Nonessential serine/threonine protein kinase; possible role in DNA damage response	1		0.0749996	1.12615	0.255779	0.307112	0.185182	0.176903	0.132758	0.598939	0.172794	0.205782	0.436829	-0.116781	0.359944	0.191459	0.53185	1.12615
YAR027W	UIP3	Putative integral membrane protein of unknown function; interacts with Ulp1p at the nuclear periphery; member of DUP240 gene family	1							-0.00012115	-0.130638	0.323141	0.318854	0.523512	0.0940941	0.162306	0.458523	0.488563	0.372062
YAR028W	YAR028W	Putative integral membrane protein, member of DUP240 gene family; GFP-fusion protein is induced in response to the DNA-damaging agent MMS	1												0.181262	-0.262166	0.176374	-0.0765915	0.23122
YAR031W	PRM9	Pheromone-regulated protein with 3 predicted transmembrane segments and an FF sequence, a motif involved in COPII binding; member of DUP240 gene family	1		-0.100294	0.108718	0.155084	-0.0794395	0.227286	-0.0546338	0.116945	0.127105	0.196562	0.509184	-0.059854	0.539729	0.937121	0.304218	0.465642	0.108718
YAR035W	YAT1	Outer mitochondrial carnitine acetyltransferase, minor ethanol-inducible enzyme involved in transport of activated acyl groups from the cytoplasm into the mitochondrial matrix; phosphorylated	1		-0.241903	0.541016	0.950989	0.70934	0.110833						0.184665	0.341146	-0.183805	1.48187	0.757368	0.541016
YAR042W	SWH1	Protein similar to mammalian oxysterol-binding protein; contains ankyrin repeats; localizes to the Golgi and the nucleus-vacuole junction	1	Swh1p/Nvj1p complex	0.0403046	1.02389	-0.165171	0.114381	0.170821	0.0696849	-0.0600243	0.156589	0.167794	0.430234	0.0724583	-0.169561	0.117628	0.302945	0.115966	1.02389
YAR071W	PHO11	One of three repressible acid phosphatases, a glycoprotein that is transported to the cell surface by the secretory pathway; induced by phosphate starvation and coordinately regulated by PHO4 and PHO2	1		-0.0089871	0.163238	-2.14385	-1.82069	0.481437	-0.008292	-1.15178	-2.92801	-0.390903	0.123273	-0.099671	-2.21356	-0.962256	-1.32919	-1.69708	0.163238
YAR073W	IMD1	Nonfunctional protein with homology to IMP dehydrogenase; probable pseudogene, located close to the telomere; is not expressed at detectable levels; YAR073W and YAR075W comprise a continuous reading frame in some strains of S. cerevisiae	1		-0.0495065	0.142592	-0.374728	-0.636477	-0.252293	0.156621	-0.144045	0.530051	-0.1332	0.897137	0.105227	-0.743069	0.109203	-0.664392	-0.199886	0.142592
YAR075W	YAR075W	Non-functional protein with homology IMP dehydrogenase; YAR073W/IMD1 and YAR075W comprise a continuous reading frame in some strains of S. cerevisiae.	1		-0.0166376	-0.0676629	0.0487682	-0.545925	-0.0974129	-0.0820223	-0.239058	0.224941	-0.0464604	0.43934	-0.079174	-0.187519	-0.15261	-0.735394	-0.160306	-0.0676629
YBL001C	ECM15	Non-essential protein of unknown function, likely exists as tetramer, may be regulated by the binding of small-molecule ligands (possibly sulfate ions), may have a role in yeast cell-wall biogenesis	2							-0.17249	-0.0752364	-1.06635	0.0473902	-1.04071	-0.0643135	0.245759	-0.871061	-0.52486	-0.0636525
YBL002W	HTB2	Histone H2B, core histone protein required for chromatin assembly and chromosome function; nearly identical to HTB1; Rad6p-Bre1p-Lge1p mediated ubiquitination regulates transcriptional activation, meiotic DSB formation and H3 methylation	2	Nucleosomal protein complex	-0.111184	-0.0692547	0.116032	0.536279	-1.15199	-0.145066	0.282384	-0.16509	-1.66725	-1.88058	-0.107154	0.500586	-0.494395	0.266974	0.158137	0.116032
YBL003C	HTA2	Histone H2A, core histone protein required for chromatin assembly and chromosome function; one of two nearly identical (see also HTA1) subtypes; DNA damage-dependent phosphorylation by Mec1p facilitates DNA repair; acetylated by Nat4p	2	Nucleosomal protein complex	-0.0169718	0.17622	-0.11345	0.261484	-0.368079	0.0028218	0.176144	-0.399668	-0.0886088	-0.394201	0.031623	0.384271	-0.315891	-0.253696	0.225564	-0.11345
YBL004W	UTP20	Component of the small-subunit (SSU) processome, which is involved in the biogenesis of the 18S rRNA	2		0.0549007	0.0211229	0.803539	0.117866	0.204281	-0.0452688	0.0605834	0.247248	-0.170134	0.112741	0.0082085	0.034133	0.120369	-0.242547	-0.192229	0.803539
YBL006C	LDB7	Component of the RSC chromatin remodeling complex; interacts with Rsc3p, Rsc30p, Npl6p, and Htl1p to form a module important for a broad range of RSC functions	2	RSC complex	0.149278	-0.270655	0.308527	0.385844	-0.286599	0.0654592	0.189526	-0.168493	-0.0709001	0.0390449	-0.0386025	-0.054996	-0.165928	-0.466097	0.163876	0.308527
YBL007C	SLA1	Cytoskeletal protein binding protein required for assembly of the cortical actin cytoskeleton; interacts with proteins regulating actin dynamics and proteins required for endocytosis; found in the nucleus and cell cortex; has 3 SH3 domains	2	actin cytoskeleton-regulatory complex, Pan1p/Sla1p/End3p complex	-0.0308677	-0.0074618	1.01721	0.0226515	-0.0811036	-0.0312586	-0.0642848	-0.226325	-0.0336798	-0.27972	0.0835498	-0.007845	0.006366	0.0039775	-0.127938	1.01721
YBL008W	HIR1	Subunit of the HIR complex, a nucleosome assembly complex involved in regulation of histone gene transcription; contributes to nucleosome formation, heterochromatic gene silencing, and formation of functional kinetochores	2	HIR complex	0.0927963	-0.0673969	0.820161	0.187504	-0.319552	0.207688	-0.153167	-0.0723885	0.267109	0.287046	0.11439	-0.047351	0.0809404	-0.103592	-0.128758	0.820161
YBL010C	YBL010C	Putative protein of unknown function; green fluorescent protein (GFP)-fusion protein colocalizes with clathrin-coated vesicles	2		0.0034092	0.150679	0.369086	0.143185	0.0934307	0.482257	-0.191962	0.078594	0.129373	0.340224	-0.0605755	-0.235298	-0.421561	-0.169899	-0.146749	0.369086
YBL011W	SCT1	Glycerol 3-phosphate/dihydroxyacetone phosphate dual substrate-specific sn-1 acyltransferase of the glycerolipid biosynthesis pathway, prefers 16-carbon fatty acids, similar to Gpt2p, gene is constitutively transcribed	2		0.0538122	-0.0271769	0.746159	0.0741228	-0.23912	-0.01363	0.192259	-0.0572749	-0.0617512	-0.508528	-0.0716315	0.231233	0.130245	-0.0591135	0.039218	0.746159
YBL015W	ACH1	Protein with CoA transferase activity, particularly for CoASH transfer from succinyl-CoA to acetate; has minor acetyl-CoA-hydrolase activity; phosphorylated; required for acetate utilization and for diploid pseudohyphal growth	2		0.0367784	-0.143577	1.01405	-0.817563	-0.0633047	-0.00407645	0.00803433	0.0130292	-0.345643	-0.385199	-0.0245755	-0.123081	-0.757857	0.406572	-0.291335	1.01405
YBL016W	FUS3	Mitogen-activated serine/threonine protein kinase involved in mating; phosphoactivated by Ste7p; substrates include Ste12p, Far1p, Bni1p, Sst2p; inhibits invasive growth during mating by phosphorylating Tec1p, promoting its degradation	2	STE5-MAPK complex	0.0454426	0.0865069	0.841505	-0.134553	-0.0124227	0.0350128	-0.305577	0.191489	-0.0337684	0.399407	0.0892313	-0.113722	-0.202073	0.235859	-0.271386	0.841505
YBL017C	PEP1	Type I transmembrane sorting receptor for multiple vacuolar hydrolases; cycles between the late-Golgi and prevacuolar endosome-like compartments	2		-0.0152095	0.0067685	0.80515	-0.210677	0.110634	0.0274659	-0.0760596	-0.0637755	0.0149984	-0.108411	0.162028	0.177142	0.288394	0.0948165	0.213282	0.80515
YBL018C	POP8	Subunit of both RNase MRP and nuclear RNase P; RNase MRP cleaves pre-rRNA, while nuclear RNase P cleaves tRNA precursors to generate mature 5' ends and facilitates turnover of nuclear RNAs	2	nucleolar ribonuclease P complex, ribonuclease MRP complex	0.0505693	0.14582	0.390375	0.114402	0.492355	0.212387	-0.0057632	-0.120394	0.232012	-0.114023	-0.104684	0.041613	-0.734276	-0.148846	0.060579	0.390375
YBL020W	RFT1	Essential integral membrane protein that is required for translocation of Man5GlcNac2-PP-Dol from the cytoplasmic side to the lumenal side of the ER membrane but is not the flippase; mutation is suppressed by expression of human p53 protein	2		0.09992	-0.150821	0.409238	1.02916	-0.0962511						0.177256	0.482057	0.15141	0.328356	0.167669	0.409238
YBL021C	HAP3	Subunit of the heme-activated, glucose-repressed Hap2p/3p/4p/5p CCAAT-binding complex, a transcriptional activator and global regulator of respiratory gene expression; contains sequences contributing to both complex assembly and DNA binding	2	CCAAT-binding factor complex	-0.0216511	0.0932039	0.578333	0.281854	0.102425	0.346157	-0.0743074	0.315376	0.0412525	0.366655	-0.0773815	0.04512	-0.251348	0.169943	0.031077	0.578333
YBL022C	PIM1	ATP-dependent Lon protease, involved in degradation of misfolded proteins in mitochondria; required for biogenesis and maintenance of mitochondria	2		0.0171135	-0.0098285	1.20155	-0.209244	0.203675	-0.0206735	0.155174	0.152678	0.162959	-0.171724	-0.0358315	0.123997	0.229163	0.0717735	-0.266285	1.20155
YBL023C	MCM2	Protein involved in DNA replication; component of the Mcm2-7 hexameric complex that binds chromatin as a part of the pre-replicative complex	2	Mcm2-7 complex	0.128082	0.0446738	0.950418	-0.153433	0.163737	-0.0260744	-0.0335187	-0.215175	-0.0955502	-0.0094485	0.179893	-0.179026	0.334844	0.294267	0.088364	0.950418
YBL024W	NCL1	S-adenosyl-L-methionine-dependent tRNA: m5C-methyltransferase, methylates cytosine to m5C at several positions in tRNAs and intron-containing pre-tRNAs; increases proportion of tRNALeu(CAA) with m5C at wobble position in response to hydrogen peroxide, causing selective translation of mRNA from genes enriched in TTG codon; loss of NCL1 confers hypersensitivity to oxidative stress; similar to Nop2p…	2		0.0094285	-0.038851	1.0147	-0.148883	-0.135923	0.0546183	-0.0966467	-0.137071	-0.0249448	-0.0507114	0.0025755	-0.011631	-0.0677062	-0.49951	-0.031442	1.0147
YBL025W	RRN10	Protein involved in promoting high level transcription of rDNA, subunit of UAF (upstream activation factor) for RNA polymerase I	2	RNA polymerase I upstream activating factor complex						0.329092	0.712427	0.297224	-0.0456113	0.358212
YBL026W	LSM2	Lsm (Like Sm) protein; part of heteroheptameric complexes (Lsm2p-7p and either Lsm1p or 8p): cytoplasmic Lsm1p complex involved in mRNA decay; nuclear Lsm8p complex part of U6 snRNP and possibly involved in processing tRNA, snoRNA, and rRNA	2	U6 snRNP complex, U4/U6 x U5 tri-snRNP complex	-0.0644622	0.0910409	0.230156	0.525996	-0.0385113	0.134344	0.208324	0.28818	0.226412	0.373304	-0.0493065	-0.21158	-0.14922	0.137222	0.059023	0.230156
YBL027W	RPL19B	Ribosomal 60S subunit protein L19B; rpl19a and rpl19b single null mutations result in slow growth, while the double null mutation is lethal; homologous to mammalian ribosomal protein L19, no bacterial homolog; RPL19B has a paralog, RPL19A, that arose from the whole genome duplication	2	cytoplasmic ribosomal large subunit	-0.0199896	-0.0539264	-0.135924	-0.213505	-0.196774	-0.052062	-0.0053049	-0.121473	0.0698536	-0.142944	-0.011255	-0.670625	-0.173496	-0.525572	-0.367747	-0.135924
YBL028C	YBL028C	Protein of unknown function that may interact with ribosomes; green fluorescent protein (GFP)-fusion protein localizes to the nucleolus; predicted to be involved in ribosome biogenesis	2		0.0436192	0.021186	0.15712	-0.339013	-0.452529	0.0755222	-0.108046	-0.00425483	0.144849	-0.0530836	-0.427753	-0.346113	-0.881081	-1.11093	-0.931029	0.15712
YBL029C-A	YBL029C-A	Protein of unknown function; green fluorescent protein (GFP)-fusion protein localizes to the cell periphery; protein abundance increases in response to DNA replication stress; has potential orthologs in Saccharomyces species and in Yarrowia lipolytica	2		0.0675071	0.125474	1.35757	0.0303173	0.317092	-0.249339	-0.0719822	-0.0220475	0.513851	-0.0806973	-0.170422	0.411016	-0.180082	1.02092	0.521958	1.35757
YBL030C	PET9	Major ADP/ATP carrier of the mitochondrial inner membrane; exchanges cytosolic ADP for mitochondrially synthesized ATP; also imports heme and ATP; phosphorylated; required for viability in many lab strains that carry a sal1 mutation; PET9 has a paralog, AAC3, that arose from the whole genome duplication	2		-0.0495421	0.0384928	1.04715	-0.0135048	-0.0624746	-0.0413617	0.130735	0.0224416	0.359751	-1.02921	-0.0303975	0.02682	-0.40504	0.590634	-0.193327	1.04715
YBL031W	SHE1	Mitotic spindle protein; interacts with components of the Dam1 (DASH) complex, its effector Sli15p, and microtubule-associated protein Bim1p; also localizes to nuclear microtubules and to the bud neck in a ring-shaped structure; inhibits dynein function	2		-0.231055	-0.270235	0.730762	-1.11084	-0.568832						-0.0997325	-0.213413	0.14649	-0.0335315	0.126956	0.730762
YBL032W	HEK2	RNA binding protein involved in the asymmetric localization of ASH1 mRNA; represses translation of ASH1 mRNA, an effect reversed by Yck1p-dependent phosphoryation; regulates telomere position effect and length; similarity to hnRNP-K	2		0.149557	0.0648439	1.01944	-0.219267	-0.340211	-0.0470962	-0.113058	-0.326734	-0.29597	-0.749321	0.0482305	-0.157662	-0.213563	-0.433183	-0.127894	1.01944
YBL033C	RIB1	GTP cyclohydrolase II; catalyzes the first step of the riboflavin biosynthesis pathway	2		0.0270567	-0.06949	0.935461	-0.165269	-0.0635272	0.118101	-0.0087055	-0.0908125	0.21362	0.331555	0.432152	-0.294195	0.308243	-0.609938	-0.176204	0.935461
YBL034C	STU1	Component of the mitotic spindle that binds to interpolar microtubules via its association with beta-tubulin (Tub2p); required for interpolar microtubules to provide an outward force on the spindle poles	2		-0.132079	-0.005057	1.10225	-0.27631	0.0164613	-0.0222091	-0.052035	0.0604054	0.230352	0.291937	-0.129153	0.117908	0.0208958	0.258419	-0.042303	1.10225
YBL035C	POL12	B subunit of DNA polymerase alpha-primase complex, required for initiation of DNA replication during mitotic and premeiotic DNA synthesis; also functions in telomere capping and length regulation	2	alpha DNA polymerase:primase complex	-0.180303	0.0579599	0.69542	0.294431	-0.406596	-0.213273	-0.338811	-0.541443	-0.521254	-0.440066	0.0404395	0.084543	-0.422058	0.0997495	0.151357	0.69542
YBL036C	YBL036C	Putative non-specific single-domain racemase based on structural similarity; binds pyridoxal 5'-phosphate; expression of GFP-fusion protein induced in response to the DNA-damaging agent MMS	2		0.0972044	0.131794	1.18094	-0.0757286	0.250989	0.00040505	0.229893	0.33007	0.110945	0.340839	0.0211465	0.225587	0.247644	-0.164542	0.111091	1.18094
YBL037W	APL3	Alpha-adaptin, large subunit of the clathrin associated protein complex (AP-2); involved in vesicle mediated transport	2	AP-2 adaptor complex	-0.0700394	0.0602939	0.776899	-0.0055137	0.18319	0.223047	0.53949	-0.0664578	0.420628	0.37404	0.154764	-0.012657	-0.0028171	-0.718033	-0.423676	0.776899
YBL038W	MRPL16	Mitochondrial ribosomal protein of the large subunit	2	mitochondrial ribosomal large subunit	-0.0468288	-0.0742914	0.385338	-0.0407547	-0.145349	0.0173354	0.0978202	-0.0101911	0.360467	-0.643848	-0.151647	0.149641	-0.386921	0.482794	-0.148562	0.385338
YBL039C	URA7	Major CTP synthase isozyme (see also URA8); catalyzes the ATP-dependent transfer of the amide nitrogen from glutamine to UTP, forming CTP, the final step in de novo biosynthesis of pyrimidines; involved in phospholipid biosynthesis; URA7 has a paralog, URA8, that arose from the whole genome duplication	2		0.0566249	-0.0963219	0.769395	-0.334297	0.0825671	0.0577105	-0.0707187	0.10451	0.020918	0.222467	0.0170965	-0.390357	-0.171536	-0.840499	-0.240937	0.769395
YBL041W	PRE7	Beta 6 subunit of the 20S proteasome	2	20S proteasome	0.0072465	-0.119955	0.632433	-0.162066	0.0457629	-0.0814246	-0.0440539	0.0330607	-0.0890261	0.160457	-0.0062495	-0.013333	-0.0941841	-0.0591945	0.035528	0.632433
YBL042C	FUI1	High affinity uridine permease, localizes to the plasma membrane; also mediates low but significant transport of the cytotoxic nucleoside analog 5-fluorouridine; not involved in uracil transport	2		0.0584271	0.0496049	-0.167904	-1.98665	0.447975						-0.0191955	-0.149676	-0.495902	-0.863121	-0.465807	-0.167904
YBL045C	COR1	Core subunit of the ubiquinol-cytochrome c reductase complex (bc1 complex), which is a component of the mitochondrial inner membrane electron transport chain	2	Cytochrome bc1 complex (Ubiquinol-cytochrome c reductase complex, complex III)	0.0250999	0.0581669	0.922183	-0.18629	-0.178352	-0.0782146	-0.0670637	-0.0812953	0.158085	-1.15669	-0.0912385	0.158574	-0.456247	0.569686	-0.0635709	0.922183
YBL046W	PSY4	Regulatory subunit of protein phosphatase PP4; presence of Psy4p in the PP4 complex (along with catalytic subunit Pph3p and Psy2p) is required for dephosphorylation of the histone variant H2AX, but not for dephosphorylation of Rad53p, during recovery from the DNA damage checkpoint; localization is cell-cycle dependent and regulated by Cdc28p phosphorylation; required for cisplatin resistance; hom…	2	histone H2A phosphatase complex	0.149877	-0.0139691	0.725196	0.0014468	0.11419	0.349799	-0.119026	-0.104817	-0.0891091	0.272491	-0.0351945	-0.210543	-0.235363	-0.22364	-0.333972	0.725196
YBL047C	EDE1	Endocytic protein; involved in a network of interactions with other endocytic proteins, binds membranes in a ubiquitin-dependent manner, may also bind ubiquitinated membrane-associated proteins; interacts with Cmk2 and functions upstream of CMK2 in regulating non-apoptotic cell death	2		0.0393299	0.0411605	1.18766	0.0842418	-0.0271521	-0.00169425	0.0256088	-0.116272	-0.230569	-0.117087	-0.0059705	-0.053012	0.230303	0.0658685	-0.235769	1.18766
YBL050W	SEC17	Peripheral membrane protein required for vesicular transport between ER and Golgi, the 'priming' step in homotypic vacuole fusion, and autophagy; stimulates the ATPase activity of Sec18p; has similarity to mammalian alpha-SNAP	2		-0.0713194	-0.087097	1.00921	-0.120239	-0.119015	-0.0145718	-0.0804361	-0.0324327	0.0814311	0.178671	-0.0509445	-0.263284	-0.115184	-0.0558645	-0.044066	1.00921
YBL051C	PIN4	Protein involved in G2/M phase progression and response to DNA damage, interacts with Rad53p; contains an RNA recognition motif, a nuclear localization signal, and several SQ/TQ cluster domains; hyperphosphorylated in response to DNA damage	2		0.0540155	-0.163362	0.846221	-0.131532	0.0488021	0.082623	-0.0965897	0.117886	0.305159	0.462371	0.101318	-0.046077	0.156103	-0.114046	0.153395	0.846221
YBL052C	SAS3	Histone acetyltransferase catalytic subunit of NuA3 complex that acetylates histone H3, involved in transcriptional silencing; homolog of the mammalian MOZ proto-oncogene; mutant has aneuploidy tolerance; sas3gcn5 double mutation is lethal	2	NuA3 histone acetyltransferase complex	0.358753	0.135917	1.26475	-0.49405	0.115687	0.292254	-0.203758	0.0355702	-0.192617	0.247097	-0.109972	0.151846	0.156983	0.0641355	0.071541	1.26475
YBL054W	TOD6	PAC motif binding protein involved in rRNA and ribosome biogenesis; subunit of the RPD3L histone deacetylase complex; Myb-like HTH transcription factor; hypophosphorylated by rapamycin treatment in a Sch9p-dependent manner; TOD6 has a paralog, DOT6, that arose from the whole genome duplication	2		-0.0962894	-0.0369203	0.555926	-0.389232	0.438012	0.0342421	0.0642136	-0.00048086	-0.0620189	0.132975	0.0478285	0.087896	-0.318147	-0.600353	-0.046506	0.555926
YBL055C	YBL055C	3'-->5' exonuclease and endonuclease with a possible role in apoptosis; has similarity to mammalian and C. elegans apoptotic nucleases	2		-0.0207	0.0745009	0.915156	0.257242	0.089512	0.0702775	0.167276	0.00472477	-0.192117	0.384464	-0.0217335	0.240239	0.166692	-0.0317505	0.250868	0.915156
YBL056W	PTC3	Type 2C protein phosphatase (PP2C); dephosphorylates Hog1p (see also Ptc2p) to limit maximal kinase activity induced by osmotic stress; dephosphorylates T169 phosphorylated Cdc28p (see also Ptc2p); role in DNA damage checkpoint inactivation; PTC3 has a paralog, PTC2, that arose from the whole genome duplication	2		0.0512232	0.0421883	0.792243	0.101533	-0.0236112	0.0535067	0.0446987	0.0591272	-0.103548	0.0201629	0.156754	-0.016703	0.120749	0.0101845	0.163643	0.792243
YBL057C	PTH2	One of two (see also PTH1) mitochondrially-localized peptidyl-tRNA hydrolases; negatively regulates the ubiquitin-proteasome pathway via interactions with ubiquitin-like ubiquitin-associated proteins; dispensable for cell growth	2		0.0147886	0.0182615	0.901389	0.160562	-0.0489405	0.0143224	-0.32246	0.058432	0.200254	0.137028	-0.0832435	-0.071214	-0.232984	-0.319402	0.184405	0.901389
YBL058W	SHP1	UBX (ubiquitin regulatory X) domain-containing protein that regulates Glc7p phosphatase activity and interacts with Cdc48p; interacts with ubiquitylated proteins in vivo and is required for degradation of a ubiquitylated model substrate	2		-0.0636208	-0.0528764	1.16321	-0.271874	-0.059634	0.00402805	-0.0157015	-0.0292884	-0.372012	-0.30505	-0.0272435	0.101343	0.0764005	-0.543407	-0.065054	1.16321
YBL059C-A	YBL059C-A	Protein of the mitochondrial intermembrane space with a role in respiratory chain complex assembly or maintenance; contains twin Cx9C motifs that can form coiled coil-helix-coiled-coil helix fold	2		-0.0358292	-0.0043364	1.1022	-0.0749156	-0.22311	0.0544348	-0.0673916	-0.286628	0.251569	-0.863128	-0.0935495	0.254076	-0.276673	0.0882165	-0.108391	1.1022
YBL059W	YBL059W	Putative protein of unknown function; the authentic, non-tagged protein is detected in highly purified mitochondria in high-throughput studies; YBL059W has a paralog, YER093C-A, that arose from the whole genome duplication	2												0.391612	0.139098	0.26861	0.596847	0.294807
YBL060W	YEL1	Guanine nucleotide exchange factor specific for Arf3p; localized to the bud neck and tip; required for localization of Arf3p to the bud neck and tip	2		0.052903	0.155422	0.870606	0.322397	-0.0111716	0.00669585	0.163974	0.124775	-0.0106847	0.175903	-0.0035405	0.089325	0.0760625	0.0098715	0.213382	0.870606
YBL061C	SKT5	Activator of Chs3p (chitin synthase III) during vegetative growth; recruits Chs3p to the bud neck via interaction with Bni4p; SKT5 has a paralog, SHC1, that arose from the whole genome duplication	2		0.0656002	0.156331	1.04305	-0.136414	0.378156	0.0450903	0.0422048	0.265041	0.0493992	0.676164	0.0099935	-0.32777	-0.0299539	0.232142	0.151999	1.04305
YBL063W	KIP1	Kinesin-related motor protein required for mitotic spindle assembly, chromosome segregation, and 2 micron plasmid partitioning; functionally redundant with Cin8p for chromosomal but not plasmid functions	2		-0.0191078	0.466296	1.35408	-0.181909	0.253181						-0.0461225	0.189328	-0.034442	-0.438947	0.218101	1.35408
YBL064C	PRX1	Mitochondrial peroxiredoxin with thioredoxin peroxidase activity; has a role in reduction of hydroperoxides; reactivation requires Trr2p and glutathione; induced during respiratory growth and oxidative stress; phosphorylated; protein abundance increases in response to DNA replication stress	2		-0.164737	-0.0075364	1.19966	-0.723581	0.280552	0.0426482	0.202546	-0.0244625	-0.385363	-0.592688	-0.0253695	0.923259	-0.0149965	0.0402765	-0.018058	1.19966
YBL066C	SEF1	Putative transcription factor, has homolog in Kluyveromyces lactis	2							0.0103413	0.182451	0.181257	0.30837	-0.573551
YBL067C	UBP13	Putative ubiquitin carboxyl-terminal hydrolase; ubiquitin-specific protease that cleaves ubiquitin-protein fusions; UBP13 has a paralog, UBP9, that arose from the whole genome duplication	2		-0.0739974	0.213355	1.11488	0.219478	0.135343	0.0203294	0.504093	0.0504765	0.105883	-0.220362	-0.0916915	0.131522	-0.0338201	0.201306	-0.171343	1.11488
YBL068W	PRS4	5-phospho-ribosyl-1(alpha)-pyrophosphate synthetase, synthesizes PRPP, which is required for nucleotide, histidine, and tryptophan biosynthesis; one of five related enzymes, which are active as heteromultimeric complexes; PRS4 has a paralog, PRS2, that arose from the whole genome duplication	2		-0.0119377	0.0813189	0.76139	-0.136064	-0.0541913	0.0716494	0.0043956	0.0562745	0.0248498	0.343407	-0.0829895	-0.189853	-0.141758	-0.132974	-0.280105	0.76139
YBL068W-A	YBL068W-A	Dubious open reading frame unlikely to encode a protein; identified by fungal homology and RT-PCR	2		-0.0698392	0.0322781	0.628481	0.115367	-0.0450996	-0.0908593	-0.0274778	0.0249	-0.0804448	0.134708	-0.229538	0.0598195	-0.333993	-0.076325	-0.054414	0.628481
YBL069W	AST1	Lipid raft associated protein; interacts with the plasma membrane ATPase Pma1p and has a role in its targeting to the plasma membrane by influencing its incorporation into lipid rafts; sometimes classified in the medium-chain dehydrogenase/reductases (MDRs) superfamily; AST1 has a paralog, AST2, that arose from the whole genome duplication	2		-0.0140123	0.0796209	0.861276	-0.0447768	-0.120271	0.238044	0.121008	-0.402561	0.161245	0.361314	0.15345	0.038816	-0.0193176	-0.226399	0.161388	0.861276
YBL072C	RPS8A	Protein component of the small (40S) ribosomal subunit; homologous to mammalian ribosomal protein S8, no bacterial homolog; RPS8A has a paralog, RPS8B, that arose from the whole genome duplication	2	cytoplasmic ribosomal small subunit	-0.0035435	-0.0256785	-0.000671015	-0.0714648	-0.0664898	0.0457822	-0.0046078	0.00965833	0.0396508	-0.0081938	0.006343	-0.242029	-0.111176	-0.440854	-0.242235	-0.000671015
YBL074C	AAR2	Component of the U5 snRNP, required for splicing of U3 precursors; originally described as a splicing factor specifically required for splicing pre-mRNA of the MATa1 cistron	2	U5 snRNP complex	0.108283	0.451499	1.40774	-0.202038	0.158643	-0.018967	-0.131337	-0.170913	-0.00473395	0.125346	0.227566	0.375983	0.126775	0.504258	0.364773	1.40774
YBL075C	SSA3	ATPase involved in protein folding and the response to stress; plays a role in SRP-dependent cotranslational protein-membrane targeting and translocation; member of the heat shock protein 70 (HSP70) family; localized to the cytoplasm	2	HMC Complex	0.100898	-0.127284	-0.283132	-0.937781	-0.748855	0.184912	0.445385	0.432287	-1.12134	-1.76064	0.11657	-1.28726	1.11168	-1.57112	-0.895141	-0.283132
YBL076C	ILS1	Cytoplasmic isoleucine-tRNA synthetase, target of the G1-specific inhibitor reveromycin A	2		-0.0399308	-0.0466162	0.854453	-0.222361	-0.0310781	-0.0139068	0.0344701	0.0955722	-0.119987	0.2387	-0.0223425	-0.177101	0.212957	-0.487399	-0.169435	0.854453
YBL078C	ATG8	Component of autophagosomes and Cvt vesicles; undergoes conjugation to phosphatidylethanolamine (PE); Atg8p-PE is anchored to membranes, is involved in phagophore expansion, and may mediate membrane fusion during autophagosome formation; deconjugation of Atg8?PE is required for efficient autophagosome biogenesis	2		0.0062093	0.338	1.22244	0.45335	0.471042	0.0893213	0.601617	0.439033	0.585654	0.292138	-0.0293475	-5.6e-05	0.601273	1.13576	0.180552	1.22244
YBL079W	NUP170	Subunit of the inner ring of the nuclear pore complex (NPC); contributes to NPC assembly and nucleocytoplasmic transport; has similarity to Nup157p; both Nup170p and NUP157p are similar to human Nup155p	2	karyopherin docking subcomplex of the Nuclear Pore Complex (NPC)	-0.0652832	-0.0320694	0.893979	-0.219343	-0.035221	0.00452315	-0.0756354	0.0314475	0.0797298	-0.0290177	-0.0055055	-0.059337	0.0034105	-0.122939	-0.02301	0.893979
YBL081W	YBL081W	Non-essential protein of unknown function; null mutation results in a decrease in plasma membrane electron transport	2		-0.0327293	-0.0310639	0.184812	-0.280347	-0.422578						-0.0766815	-0.794147	-0.812458	-1.63372	-1.01198	0.184812
YBL084C	CDC27	Subunit of the Anaphase-Promoting Complex/Cyclosome (APC/C), which is a ubiquitin-protein ligase required for degradation of anaphase inhibitors, including mitotic cyclins, during the metaphase/anaphase transition	2	anaphase-promoting complex						0.196552	0.0969995	0.385186	0.129587	-0.173263
YBL085W	BOI1	Protein implicated in polar growth, functionally redundant with Boi2p; interacts with bud-emergence protein Bem1p; contains an SH3 (src homology 3) domain and a PH (pleckstrin homology) domain	2		0.0803701	0.104565	0.978754	-0.0484932	-0.0104691	0.00816725	-0.117568	-0.0544276	0.0294655	-0.278952	-0.0290275	0.004346	-0.153497	-0.177735	-0.20621	0.978754
YBL087C	RPL23A	Ribosomal 60S subunit protein L23A; homologous to mammalian ribosomal protein L23 and bacterial L14; RPL23A has a paralog, RPL23B, that arose from the whole genome duplication	2	cytoplasmic ribosomal large subunit	0.0119579	-0.148855	-0.309861	-0.225657	-0.224171	-0.0658393	0.0009476	-0.22654	-0.019453	-0.146018	0.041225	-0.517497	-0.232874	-0.701212	-0.303055	-0.309861
YBL090W	MRP21	Mitochondrial ribosomal protein of the small subunit; MRP21 exhibits genetic interactions with mutations in the COX2 and COX3 mRNA 5'-untranslated leader sequences	2	mitochondrial ribosomal small subunit	0.0380009	-0.148686	0.608306	-0.193667	-0.236242	0.066629	0.142787	0.0711486	0.389247	-0.707844	0.0142535	0.259746	-0.200724	0.374283	-0.326239	0.608306
YBL091C	MAP2	Methionine aminopeptidase, catalyzes the cotranslational removal of N-terminal methionine from nascent polypeptides; function is partially redundant with that of Map1p	2		-0.0110124	-0.0455306	0.919969	-0.264789	-0.255388	0.0200623	-0.1253	0.0753952	-0.205548	-0.256336	0.0145085	-0.252755	-0.0603878	-0.0465635	-0.160191	0.919969
YBL091C-A	SCS22	Protein involved in regulation of phospholipid metabolism; homolog of Scs2p; similar to D. melanogaster inturned protein	2		0.525349	0.436004	1.47704	0.265145	0.0253553						0.0706816	0.13729	0.241996	0.0867825	0.037638	1.47704
YBL092W	RPL32	Ribosomal 60S subunit protein L32; overexpression disrupts telomeric silencing; homologous to mammalian ribosomal protein L32, no bacterial homolog	2	cytoplasmic ribosomal large subunit	0.0008161	-0.163544	-0.140115	-0.261482	-0.239868	-0.0571063	-0.041544	-0.259668	0.0742462	-0.172202	-0.0215195	-0.393147	-0.285287	-0.674264	-0.32409	-0.140115
YBL093C	ROX3	Subunit of the RNA polymerase II mediator complex; associates with core polymerase subunits to form the RNA polymerase II holoenzyme	2	Kornberg's mediator (SRB) complex	-0.0385075	0.0687769	0.112687	-0.0041354	-0.045908	-0.232874	-0.298478	-0.558848	-0.227269	0.18677	-0.0423665	-0.220875	0.0173389	-0.154254	-0.0909188	0.112687
YBL095W	YBL095W	Putative protein of unknown function; the authentic, non-tagged protein is detected in highly purified mitochondria in high-throughput studies	2												0.0757135	-0.462889	-0.477353	-0.219811	-0.036078
YBL097W	BRN1	Subunit of the condensin complex; required for chromosome condensation and for clustering of tRNA genes at the nucleolus; may influence multiple aspects of chromosome transmission	2	nuclear condensin complex	-0.0908674	-0.0226569	0.281235	0.0413728	-0.0474102	-0.0743417	0.0336129	-0.156289	-0.0609081	-0.026306	0.0234605	-0.158213	0.0173636	-0.286402	0.023607	0.281235
YBL098W	BNA4	Kynurenine 3-mono oxygenase, required for the de novo biosynthesis of NAD from tryptophan via kynurenine; expression regulated by Hst1p; putative therapeutic target for Huntington disease	2		-0.102106	0.17113	0.450844	-0.704656	-0.420653	-0.0832386	0.0492852	0.402874	0.882307	1.47716	0.0877745	-0.128744	0.4407	0.163212	0.421937	0.450844
YBL099W	ATP1	Alpha subunit of the F1 sector of mitochondrial F1F0 ATP synthase, which is a large, evolutionarily conserved enzyme complex required for ATP synthesis; phosphorylated	2	F0/F1 ATP synthase (complex V)	0.00611	-0.0178752	0.457649	-0.226851	-0.275754	-0.0391001	-0.0902117	-0.100783	0.0754981	-1.3269	0.0028205	0.154577	-0.284799	0.481621	-0.115849	0.457649
YBL101C	ECM21	Protein involved in regulating the endocytosis of plasma membrane proteins; identified as a substrate for ubiquitination by Rsp5p and deubiquitination by Ubp2p; promoter contains several Gcn4p binding elements	2		-0.0010983	0.170961	1.06372	0.0350568	0.204472	-0.0156514	0.292729	0.200351	0.483501	0.522267	-0.112285	0.064806	0.288435	0.449772	0.087107	1.06372
YBL103C	RTG3	Basic helix-loop-helix-leucine zipper (bHLH/Zip) transcription factor that forms a complex with another bHLH/Zip protein, Rtg1p, to activate the retrograde (RTG) and TOR pathways	2	Rtg1p/Rtg3p complex	-0.318494	0.0189024	0.833353	-0.180798	-0.187778	0.00536255	-0.0472231	-0.338748	0.262503	0.091062						0.833353
YBL104C	YBL104C	Subunit of the SEA (Seh1-associated) complex, a coatomer-related complex that associates dynamically with the vacuole; has an N-terminal beta-propeller fold and a C-terminal RING motif; promoter contains multiple GCN4 binding sites	2		0.147569	-0.02859	1.28725	0.141748	0.00442395	0.0749545	0.115371	0.113314	0.206368	0.0918818	-0.0370865	0.151966	0.146411	-0.0936315	-0.0957918	1.28725
YBL105C	PKC1	Protein serine/threonine kinase essential for cell wall remodeling during growth; localized to sites of polarized growth and the mother-daughter bud neck; homolog of the alpha, beta, and gamma isoforms of mammalian protein kinase C (PKC)	2		-0.0522157	0.0605309	1.07538	0.0346858	0.0507012	0.0222472	0.126348	0.179966	-0.00843995	-0.122418	-0.0446005	0.080875	-0.0692512	-0.0075125	-0.013361	1.07538
YBL107C	YBL107C	Mitochondrial intermembrane space protein of unknown function; imported via the MIA import machinery; contains an unusual twin cysteine motif (CX13C CX14C)	2		0.137062	-0.0151503	1.18912	-0.19756	-0.00768135	-0.0466443	0.254735	0.114363	0.0264102	-0.237235	0.179904	0.263328	-0.158771	-0.279333	-0.13538	1.18912
YBR001C	NTH2	Putative neutral trehalase, required for thermotolerance and may mediate resistance to other cellular stresses	2		-0.195259	0.151302	-0.178559	0.0491116	0.379333	-0.0064106	0.358732	0.373765	-0.0570888	0.317987	-0.323593	0.151766	-0.110986	0.8998	-0.391554	-0.178559
YBR002C	RER2	Cis-prenyltransferase involved in dolichol synthesis; participates in endoplasmic reticulum (ER) protein sorting	2		0.0895818	0.0494709	1.02401	0.2244	0.610013	0.0814789	0.118248	0.0391402	0.135017	0.768	-0.258257	0.166224	-0.344012	-0.415484	0.137772	1.02401
YBR003W	COQ1	Hexaprenyl pyrophosphate synthetase, catalyzes the first step in ubiquinone (coenzyme Q) biosynthesis	2		0.0264354	0.0002278	1.08788	-0.346858	-0.126618	0.0519783	-0.0471276	-0.110434	0.33603	-0.653333	0.0687261	0.146449	-0.303524	0.268883	0.008524	1.08788
YBR006W	UGA2	Succinate semialdehyde dehydrogenase involved in the utilization of gamma-aminobutyrate (GABA) as a nitrogen source; part of the 4-aminobutyrate and glutamate degradation pathways; localized to the cytoplasm	2		-0.0743854	0.18354	1.31122	-0.824631	0.340281	-0.126593	0.291958	0.272884	-0.00510695	-0.341397	0.0152165	0.415127	-0.157679	0.894015	0.098172	1.31122
YBR007C	DSF2	Deletion suppressor of mpt5 mutation	2		-0.0854744	-0.149445	1.04318	0.0948738	-0.0557264	-0.0515275	0.203457	0.202033	-0.100632	0.237818	0.380155	0.108233	-0.102341	0.131474	0.205189	1.04318
YBR009C	HHF1	Histone H4, core histone protein required for chromatin assembly and chromosome function; one of two identical histone proteins (see also HHF2); contributes to telomeric silencing; N-terminal domain involved in maintaining genomic integrity	2	Nucleosomal protein complex, RNA polymerase I upstream activating factor complex	0.0174508	0.828628	0.328163	0.912707	0.252133	-0.035138	0.751187	0.0903455	0.429228	0.153126	0.059907	0.169238	1.21753	0.19599	0.444074	0.328163
YBR010W	HHT1	Histone H3, core histone protein required for chromatin assembly, part of heterochromatin-mediated telomeric and HM silencing; one of two identical histone H3 proteins (see HHT2); regulated by acetylation, methylation, and phosphorylation	2	Nucleosomal protein complex, RNA polymerase I upstream activating factor complex	-0.0359553	0.0535624	-0.141832	0.739547	-0.415833	-0.0507404	0.300778	-0.129511	-0.201738	-0.301368	0.012207	0.336597	-0.280528	0.089411	0.144662	-0.141832
YBR011C	IPP1	Cytoplasmic inorganic pyrophosphatase (PPase), homodimer that catalyzes the rapid exchange of oxygens from Pi with water, highly expressed and essential for viability, active-site residues show identity to those from E. coli PPase	2		-0.043593	-0.0748283	0.738268	-0.603518	-0.20459	-0.0379446	-0.0897367	-0.242981	-0.233564	-0.390643	-0.140686	-0.042009	-0.400619	-0.617793	-0.64509	0.738268
YBR014C	GRX7	Cis-golgi localized monothiol glutaredoxin; more similar in activity to dithiol than other monothiol glutaredoxins; involved in the oxidative stress response; does not bind metal ions; functional overlap with GRX6	2		0.113381	-0.0423016	0.599892	-0.627226	-0.0735129	0.00972365	0.105562	-0.155845	-0.0728868	0.18931	0.0760686	0.059719	-0.233217	-0.289658	0.476333	0.599892
YBR015C	MNN2	Alpha-1,2-mannosyltransferase, responsible for addition of the first alpha-1,2-linked mannose to form the branches on the mannan backbone of oligosaccharides, localizes to an early Golgi compartment	2		-0.0647827	-0.110066	0.753341	-0.278171	-0.25042	0.0352652	0.0135452	-0.14199	-0.0209363	0.0559805	-0.0013425	0.126979	-0.137354	-0.0350445	-0.0563811	0.753341
YBR017C	KAP104	Transportin or cytosolic karyopherin beta 2; functions in the rg-nuclear localization signal-mediated nuclear import/reimport of mRNA-binding proteins Nab2p and Hrp1p; regulates asymmetric protein synthesis in daughter cells during mitosis	2		-0.0518337	-0.0117079	0.772998	0.182969	0.0954327	-0.0620856	-0.172536	-0.139103	-0.194314	0.290528	-0.0312825	0.00546	0.145444	-0.112696	-0.283463	0.772998
YBR022W	POA1	Phosphatase that is highly specific for ADP-ribose 1''-phosphate, a tRNA splicing metabolite; may have a role in regulation of tRNA splicing	2		0.197518	-0.205542	0.800885	0.256861	-0.557893	-0.139539	-0.0981657	-0.637539	0.10842	-0.65181	-0.0280335	-0.053193	-0.392788	-0.229352	-0.349853	0.800885
YBR023C	CHS3	Chitin synthase III, catalyzes the transfer of N-acetylglucosamine (GlcNAc) to chitin; required for synthesis of the majority of cell wall chitin, the chitin ring during bud emergence, and spore wall chitosan	2		-0.0338759	0.0129777	1.19125	-0.63406	0.0782391	0.03362	0.0432137	0.493392	0.145728	0.782267	-0.0633475	-0.384991	-0.119117	0.319935	0.002064	1.19125
YBR024W	SCO2	Protein anchored to the mitochondrial inner membrane, similar to Sco1p and may have a redundant function with Sco1p in delivery of copper to cytochrome c oxidase; interacts with Cox2p	2		0.0214156	-0.422048	1.12738	-0.582737	-0.159196	0.237918	0.0434684	0.00576364	-0.132391	-0.701824	0.192365	0.422168	-1.02713	0.837975	0.193754	1.12738
YBR025C	OLA1	P-loop ATPase with similarity to human OLA1 and bacterial YchF; identified as specifically interacting with the proteasome; protein abundance increases in response to hydrogen peroxide and to DNA replication stress	2		-0.012755	-0.0960993	0.678893	-0.293069	-0.139523	-0.0148787	-0.0861337	-0.0502461	-0.237924	-0.104718	-0.0270325	-0.297652	-0.246255	-0.347157	-0.148226	0.678893
YBR026C	ETR1	2-enoyl thioester reductase, member of the medium chain dehydrogenase/reductase family; localized to in mitochondria, where it has a probable role in fatty acid synthesis	2		0.0327283	-0.0581887	1.08647	-0.34496	-0.0298149	0.00165805	0.0033249	0.149406	-0.170128	-0.170194	0.0454285	-0.026841	0.0276998	0.489627	-0.106459	1.08647
YBR028C	YBR028C	An AGC kinase phosphorylated by cAMP-dependent protein kinase (PKA) in a TORC1-dependent manner	2		0.0370805	0.109747	0.464189	-0.315866	-0.32558	-0.0915977	-0.0148763	-0.277984	-0.108185	-0.498867	0.0237175	-0.219537	-0.183235	-0.88393	-0.008645	0.464189
YBR029C	CDS1	Phosphatidate cytidylyltransferase (CDP-diglyceride synthetase); an enzyme that catalyzes that conversion of CTP + phosphate into diphosphate + CDP-diaclglyerol, a critical step in the synthesis of all major yeast phospholipids	2		-0.0146331	-0.180394	0.364134	-0.116216	-0.315874	-0.0107809	0.0380183	-0.0138658	0.0759801	0.192339	-0.0731785	-0.221463	-0.355337	-0.587812	-0.421851	0.364134
YBR030W	RKM3	Ribosomal lysine methyltransferase specific for monomethylation of Rpl42ap and Rpl42bp (lysine 40); nuclear SET domain containing protein	2		-0.0605438	-0.0636225	0.864926	0.461673	0.0175389	0.167822	-0.218306	-0.0964661	-0.26175	0.382211	0.0198655	-0.139699	-0.0290407	-0.40558	-0.113598	0.864926
YBR031W	RPL4A	Ribosomal 60S subunit protein L4A; N-terminally acetylated; homologous to mammalian ribosomal protein L4 and bacterial L4; RPL4A has a paralog, RPL4B, that arose from the whole genome duplication	2	cytoplasmic ribosomal large subunit	-0.0295827	-0.105269	0.0503653	-0.398887	-0.108707	-0.0669637	-0.0695306	-0.154593	-0.108944	-0.105964	-0.113426	-0.425361	-0.433497	-0.75031	-0.433695	0.0503653
YBR034C	HMT1	Nuclear SAM-dependent mono- and asymmetric arginine dimethylating methyltransferase that modifies hnRNPs, including Npl3p and Hrp1p, affecting their activity and nuclear export; methylates U1 snRNP protein Snp1p and ribosomal protein Rps2p	2		-0.161505	0.0140735	0.918693	-0.133593	-0.0370747	-0.116378	-0.0076352	-0.126008	-0.0914811	-0.0061427	-0.166468	0.030284	-0.216515	-0.322505	-0.287368	0.918693
YBR035C	PDX3	Pyridoxine (pyridoxamine) phosphate oxidase, has homologs in E. coli and Myxococcus xanthus; transcription is under the general control of nitrogen metabolism	2		-0.0225488	0.0573319	1.12755	-0.532332	-0.10318	0.014488	0.0182228	-0.0131202	-0.296561	-0.0924163	0.0462405	-0.083795	0.149103	-0.45539	-0.552	1.12755
YBR037C	SCO1	Copper-binding protein of the mitochondrial inner membrane, required for cytochrome c oxidase activity and respiration; may function to deliver copper to cytochrome c oxidase; has similarity to thioredoxins	2		-0.0836694	-0.355772	0.90955	-0.0781992	-0.410419	-0.0339323	-0.143823	-0.303793	0.167598	-0.754676	-0.0212715	0.494081	-0.115547	0.0728565	-0.18545	0.90955
YBR038W	CHS2	Chitin synthase II; catalyzes transfer of N-acetylglucosamine (GlcNAc) to chitin upon activation of zymogenic form; required for chitin synthesis in the primary septum during cytokinesis; localization regulated by Cdk1p during mitosis	2		0.0988041	-0.019405	1.28497	0.133618	0.222462	0.180437	0.223086	0.631871	-0.192624	0.327874	0.0283015	-0.336195	0.307222	-0.199366	7.1e-05	1.28497
YBR039W	ATP3	Gamma subunit of the F1 sector of mitochondrial F1F0 ATP synthase, which is a large, evolutionarily conserved enzyme complex required for ATP synthesis	2	F0/F1 ATP synthase (complex V)	-0.0755704	-0.0400957	0.164166	-0.276006	-0.336821	-0.0991187	-0.168117	-0.24339	0.114623	-1.44898	-0.0737225	0.137385	-0.479508	0.393167	-0.131027	0.164166
YBR041W	FAT1	Very long chain fatty acyl-CoA synthetase and long chain fatty acid transporter; activates imported fatty acids with a preference for very long lengths (C20-C26); has a separate function in the transport of long chain fatty acids	2	Fatty Acid Import Complex	-0.0840354	0.122387	1.21569	0.329688	0.301091	0.132504	0.25274	0.4545	0.18168	0.518918	0.0578265	-0.014535	0.464417	0.42939	0.137606	1.21569
YBR042C	CST26	Protein required for incorporation of stearic acid into phosphatidylinositol; affects chromosome stability when overexpressed	2		-0.11375	-0.0213817	0.985729	-0.330262	-0.299975	0.0254463	0.228338	0.306598	-0.0695835	-0.0057401	-0.17163	0.063667	0.218017	-0.4111	-0.410894	0.985729
YBR044C	TCM62	Protein involved in the assembly of the mitochondrial succinate dehydrogenase complex; putative chaperone	2		0.457655	0.220337	0.845236	-0.144462	0.351881	0.0250361	-0.108839	-0.171294	0.228212	-0.455026	0.276261	0.004972	0.224466	0.787655	0.478474	0.845236
YBR046C	ZTA1	NADPH-dependent quinone reductase, GFP-tagged protein localizes to the cytoplasm and nucleus; has similarity to E. coli quinone oxidoreductase and to human zeta-crystallin	2		-0.0398309	-0.0254264	1.06224	0.140033	0.110058	-0.0192956	-0.0121316	0.170501	0.44367	0.0557314	0.109838	-0.387358	0.439143	0.714225	-0.0893695	1.06224
YBR048W	RPS11B	Protein component of the small (40S) ribosomal subunit; homologous to mammalian ribosomal protein S11 and bacterial S17; RPS11B has a paralog, RPS11A, that arose from the whole genome duplication	2	cytoplasmic ribosomal small subunit	0.0110884	0.0316383	-0.0557987	-0.0642396	-0.203965	0.017751	0.197191	0.182165	0.0767635	-0.0410594	-0.066941	-0.552243	0.0455224	-0.503145	-0.550363	-0.0557987
YBR049C	REB1	RNA polymerase I enhancer binding protein; DNA binding protein that binds to genes transcribed by both RNA polymerase I and RNA polymerase II; required for termination of RNA polymerase I transcription; REB1 has a paralog, NSI1, that arose from the whole genome duplication	2		0.0219187	0.0012713	0.294836	-0.0289084	-0.256335	0.00154165	-0.0190275	-0.085557	-0.204305	-0.275415	0.145237	0.207588	-0.0852041	-0.30347	0.300588	0.294836
YBR052C	RFS1	Protein of unknown function; member of a flavodoxin-like fold protein family that includes Pst2p and Ycp4p; green fluorescent protein (GFP)-fusion protein localizes to the cytoplasm in a punctate pattern	2		-0.0865864	0.180451	1.00901	0.116662	0.407027	-0.042365	0.146295	-0.0426965	0.0175302	-0.18933	0.346929	0.103722	0.440915	0.19222	0.228602	1.00901
YBR053C	YBR053C	Putative protein of unknown function; induced by cell wall perturbation	2		-0.236786	0.605822	2.15189	-0.0329649	0.807736	-0.0876707	0.974655	0.608405	0.0499802	0.513701	0.0097875	0.996149	0.145495	1.22434	0.320087	2.15189
YBR054W	YRO2	Protein of unknown function with similarity to archaeal rhodopsins; the authentic, non-tagged protein is detected in a phosphorylated state in highly purified mitochondria in high-throughput studies; transcriptionally regulated by Haa1p	2		-0.25314	-0.119865	1.47437	-3.01068	0.310168	-0.0146739	0.15693	1.22224	-3.76741	-2.10146	-0.0788255	2.30316	-1.2553	0.48848	1.22996	1.47437
YBR055C	PRP6	Splicing factor, component of the U4/U6-U5 snRNP complex	2	U4/U6 x U5 tri-snRNP complex	-0.0042193	-0.037149	0.561463	-0.104537	0.102575	-0.0200975	0.127416	-0.0437921	0.0479431	0.129609	0.0709752	0.069792	0.208479	0.250044	-0.036291	0.561463
YBR056W	YBR056W	Mitochondrial intermembrane space protein of unknown function	2		-0.0123493	0.114422	1.25199	-0.07378	0.197905	0.0346016	0.161569	0.299051	0.0489486	0.152694	-0.0510805	0.197024	0.428013	0.943735	0.145275	1.25199
YBR057C	MUM2	Cytoplasmic protein essential for meiotic DNA replication and sporulation; interacts with Orc2p, which is a component of the origin recognition complex	2		0.11947	0.12876	0.554638	0.0024478	0.42915	-0.0394624	-0.0294284	-0.285881	-0.140273	-0.261923	0.0434295	-0.292117	-0.0443671	-0.225645	-0.107773	0.554638
YBR058C	UBP14	Ubiquitin-specific protease that specifically disassembles unanchored ubiquitin chains; involved in fructose-1,6-bisphosphatase (Fbp1p) degradation; similar to human isopeptidase T	2		0.100911	-0.082796	1.09584	-0.0144514	0.0886354	-0.0939337	-0.130911	0.221111	-0.0632383	-0.0753143	0.0270155	0.38837	0.286502	0.13336	-0.002475	1.09584
YBR058C-A	TSC3	Protein that stimulates the activity of serine palmitoyltransferase (Lcb1p, Lcb2p) several-fold; involved in sphingolipid biosynthesis	2		-0.155045	-0.0618036	0.0951946	-0.112071	-0.137205	0.228573	0.0984195	0.0796036	0.0755813	0.258149	-0.0481475	0.020545	-0.188144	0.0162445	-0.137154	0.0951946
YBR059C	AKL1	Ser-Thr protein kinase, member (with Ark1p and Prk1p) of the Ark kinase family; involved in endocytosis and actin cytoskeleton organization	2		-0.0276565	-0.0263919	1.16144	0.107444	0.182264	0.0583145	-0.0402852	-0.0174129	0.0271225	0.199987	0.0442485	0.183074	0.316406	0.291348	-0.157546	1.16144
YBR060C	ORC2	Subunit of the origin recognition complex, which directs DNA replication by binding to replication origins and is also involved in transcriptional silencing; interacts with Spp1p and with trimethylated histone H3; phosphorylated by Cdc28p	2	Origin recognition complex	-0.0605448	0.0179627	0.0454405	0.185117	0.212539	0.0860327	0.0579527	-0.0572538	-0.00997635	0.136934	0.211466	-0.069664	0.0210186	0.580849	-0.030299	0.0454405
YBR061C	TRM7	2'-O-ribose methyltransferase; methylates the 2'-O-ribose of tRNA-Phe, tRNA-Trp, and tRNA-Leu at positions C32 and N34 of the tRNA anticodon loop; crucial biological role likely modification of tRNA-Phe; interacts with Trm732p and Rtt10p in 2'-O-methylation of C32 and N34 substrate tRNAs, respectively	2		-0.0548906	-0.0337119	0.587675	-0.096527	-0.308238	-0.0444852	-0.0033743	-0.0926559	-0.113012	-0.0170909	0.0432135	0.202285	-0.0416296	-0.249691	0.222643	0.587675
YBR062C	YBR062C	Protein of unknown function that interacts with Msb2p; may play a role in activation of the filamentous growth pathway.	2												0.107074	0.042556	0.264441	-0.0242595	0.08231
YBR065C	ECM2	Pre-mRNA splicing factor, facilitates the cooperative formation of U2/U6 helix II in association with stem II in the spliceosome, function may be regulated by Slu7p	2		-0.0346792	0.0376662	0.580948	-0.584409	0.0673683	-0.200614	-0.170406	-0.241299	0.0368747	0.245413	0.0554105	-0.076178	0.186916	-0.32652	0.111713	0.580948
YBR068C	BAP2	High-affinity leucine permease, functions as a branched-chain amino acid permease involved in the uptake of leucine, isoleucine and valine; contains 12 predicted transmembrane domains	2		0.0758856	-0.0229536	0.761769	-0.205797	-0.0108025	0.0400143	-0.296193	0.0967327	0.00301535	0.127866	-0.0258575	-0.496813	0.0446907	-1.61162	0.076694	0.761769
YBR069C	TAT1	Amino acid transporter for valine, leucine, isoleucine, and tyrosine; low-affinity tryptophan and histidine transporter; overexpression confers FK506 and FTY720 resistance; protein abundance increases in response to DNA replication stress	2		0.147084	-0.103843	0.808045	-0.111994	-0.424632	-0.0871987	-0.500423	-0.152786	-0.677908	-1.70424	0.0771581	0.335823	-0.10646	-0.590372	0.074566	0.808045
YBR071W	YBR071W	Protein of unknown function found in the cytoplasm and bud neck; mRNA expression may be regulated by the cell cycle and/or cell wall stress; overexpression of YBR071W affects endocytic protein trafficking	2		0.0613439	0.256349	0.902672	0.89558	0.176449	0.171614	-0.162744	-0.1778	0.168237	0.240138	0.0332715	-0.52849	-0.0290878	0.0842195	0.089556	0.902672
YBR072W	HSP26	Small heat shock protein (sHSP) with chaperone activity; forms hollow, sphere-shaped oligomers that suppress unfolded proteins aggregation; oligomer activation requires heat-induced conformational change; also has mRNA binding activity	2		0.0201855	-0.182706	0.143038	-1.33644	-0.962949	-0.0922097	0.305396	-0.446139	-1.55591	-3.57704	-0.0977825	-2.10854	-2.2367	-1.72563	-2.22895	0.143038
YBR073W	RDH54	DNA-dependent ATPase; stimulates strand exchange by modifying the topology of double-stranded DNA; involved in recombinational repair of DNA double-strand breaks during mitosis and meiosis; proposed to be involved in crossover interference; interacts with Dmc1p; stimulates Dmc1p and Rad51p	2		-0.0275377	0.123576	0.99038	-0.169564	0.0867653	-0.00601995	0.0270796	0.355592	0.240288	0.329961	0.0625265	-0.329147	-0.0315329	0.282426	-0.192811	0.99038
YBR074W	YBR074W	Putative metalloprotease	2		0.0050247	-0.304139	0.593161	-0.378631	-0.245727	0.263832	-0.310307	0.169175	-0.567423	-0.132141	0.0123645	-0.131012	-0.310378	-0.424134	0.126575	0.593161
YBR077C	SLM4	Component of the EGO complex, which is involved in the regulation of microautophagy, and of the GSE complex, which is required for proper sorting of amino acid permease Gap1p; gene exhibits synthetic genetic interaction with MSS4	2	EGO complex, GSE Complex	-0.118765	0.0871889	0.53651	-0.0712909	-0.0311352	-0.131963	0.0152107	-0.261438	0.255791	-0.0498602	0.134439	-0.419638	0.255742	0.0945245	0.216884	0.53651
YBR078W	ECM33	GPI-anchored protein of unknown function, has a possible role in apical bud growth; GPI-anchoring on the plasma membrane crucial to function; phosphorylated in mitochondria; similar to Sps2p and Pst1p	2		0.0341574	-0.277855	1.18163	-0.230803	-0.126685	-0.0678457	0.11823	-0.153606	-0.0457624	0.136747	-0.0368705	0.044543	-0.136274	-0.367652	-0.154762	1.18163
YBR079C	RPG1	eIF3a subunit of the core complex of translation initiation factor 3 (eIF3), essential for translation; part of a Prt1p-Rpg1p-Nip1p subcomplex that stimulates binding of mRNA and tRNA(i)Met to ribosomes; involved in translation reinitiation	2	eIF3	0.0125328	-0.040275	0.381924	-0.100719	-0.0186625	-0.0232033	-0.0345168	-0.0558127	-0.0245906	0.0268776	-0.0636825	0.369019	-0.0907881	-0.384188	-0.112021	0.381924
YBR080C	SEC18	ATPase required for vesicular transport between ER and Golgi, the 'priming' step in homotypic vacuole fusion, autophagy, and protein secretion; releases Sec17p from SNAP complexes; has similarity to mammalian NSF	2		0.0043522	-0.0302503	1.02675	0.0233004	-0.0397976	0.0446136	0.0410331	0.148049	0.0239907	0.181439	0.0278275	-0.032865	0.227982	0.141268	0.060863	1.02675
YBR081C	SPT7	Subunit of the SAGA transcriptional regulatory complex, involved in proper assembly of the complex; also present as a C-terminally truncated form in the SLIK/SALSA transcriptional regulatory complex	2	SAGA complex, SLIK (SAGA-like) complex	0.0141044	-0.0102771	0.600015	0.0257561	-0.0448539	-0.0679456	0.0169841	-0.0683925	-0.0100073	-0.127782	-0.0846995	-0.003261	0.150735	0.166838	-0.0577756	0.600015
YBR082C	UBC4	Ubiquitin-conjugating enzyme (E2), mediates degradation of abnormal or excess proteins, including calmodulin and histone H3; interacts with many SCF ubiquitin protein ligases; component of the cellular stress response	2		-0.0756424	0.145352	1.18029	0.0889138	0.112064	-0.127675	0.277816	0.530243	0.0201393	-0.0117484	0.0658785	0.241083	0.119224	0.140313	0.041045	1.18029
YBR084C-A	RPL19A	Ribosomal 60S subunit protein L19A; rpl19a and rpl19b single null mutations result in slow growth, while the double null mutation is lethal; homologous to mammalian ribosomal protein L19, no bacterial homolog; RPL19A has a paralog, RPL19B, that arose from the whole genome duplication	2	cytoplasmic ribosomal large subunit	-0.0199896	-0.0539264	-0.135924	-0.213505	-0.196774	-0.052062	-0.0053049	-0.121473	0.0698536	-0.142944	-0.011255	-0.670625	-0.173496	-0.525572	-0.367747	-0.135924
YBR084W	MIS1	Mitochondrial C1-tetrahydrofolate synthase, involved in interconversion between different oxidation states of tetrahydrofolate (THF); provides activities of formyl-THF synthetase, methenyl-THF cyclohydrolase, and methylene-THF dehydrogenase	2		-0.0079281	-0.0652237	0.754718	-0.211534	0.0193378	-0.00740135	0.0138583	-0.191176	0.0622846	-0.107968	-0.0262725	-0.008018	-0.306702	-0.220306	0.05089	0.754718
YBR085C-A	YBR085C-A	Putative protein of unknown function; green fluorescent protein (GFP)-fusion protein localizes to the cytoplasm and to the nucleus; protein abundance increases in response to DNA replication stress	2		-0.104742	1.17726	1.82838	-0.395197	1.2358	-0.0534371	1.05073	0.296986	0.898372	0.766784	0.123564	0.730754	0.887295	2.48425	0.444815	1.82838
YBR085W	AAC3	Mitochondrial inner membrane ADP/ATP translocator; exchanges cytosolic ADP for mitochondrially synthesized ATP; expressed under anaerobic conditions; similar to Aac1p; has roles in maintenance of viability and in respiration; AAC3 has a paralog, PET9, that arose from the whole genome duplication	2		0.0227327	-0.0667357	0.933112	-0.343143	-0.132884	0.117591	0.0007671	-0.313538	0.355985	1.74067	0.161672	-2.9913	0.557464	-0.473863	-1.46754	0.933112
YBR086C	IST2	Plasma membrane protein that may be involved in osmotolerance, localizes to the mother cell in small-budded cells and to the bud in medium- and large-budded cells; mRNA is transported to the bud tip by an actomyosin-driven process	2		-0.0007983	-0.0236417	1.0544	-0.368266	-0.208511	0.0410438	-0.151097	-0.107904	-0.0968521	-0.16015	-0.0840105	-0.011526	-0.116348	0.124708	-0.1161	1.0544
YBR087W	RFC5	Subunit of heteropentameric Replication factor C (RF-C), which is a DNA binding protein and ATPase that acts as a clamp loader of the proliferating cell nuclear antigen (PCNA) processivity factor for DNA polymerases delta and epsilon	2	DNA replication factor C complex (Rad24p), DNA replication factor C complex (Elg1p), DNA replication factor C complex (Rcf1p), DNA replication factor C complex (Ctf18p/Ctf8p/dcc1p)	-0.0587231	-0.0408863	0.754561	-0.020318	-0.0192662	0.0771011	-0.0145872	0.229144	0.0536601	0.255146	0.180777	0.160408	0.135403	0.166348	0.493171	0.754561
YBR088C	POL30	Proliferating cell nuclear antigen (PCNA), functions as the sliding clamp for DNA polymerase delta; may function as a docking site for other proteins required for mitotic and meiotic chromosomal DNA replication and for DNA repair	2		0.0215552	0.149698	1.14586	-0.088035	-0.151953	-0.0770156	0.156747	-0.195424	0.0703166	-0.0240994	0.0011845	-0.131203	-0.141773	0.0676885	0.039237	1.14586
YBR089C-A	NHP6B	High-mobility group (HMG) protein, binds to and remodels nucleosomes; involved in recruiting FACT and other chromatin remodelling complexes to the chromosomes; functionally redundant with Nhp6Ap; homologous to mammalian HMGB1 and HMGB2; NHP6B has a paralog, NHP6A, that arose from the whole genome duplication	2		-0.11727	-0.112133	-0.0557062	-0.229168	-0.829022	0.00068035	0.0808651	-0.579296	0.00045735	-0.0978283	0.24094	0.257977	-0.0259658	-0.132428	-0.553309	-0.0557062
YBR091C	TIM12	Essential protein of the inner mitochondrial membrane, peripherally localized; component of the TIM22 complex, which is a twin-pore translocase that mediates insertion of numerous multispanning inner membrane proteins	2	mitochondrial inner membrane protein insertion complex						0.312527	-0.255893	-0.403534	-0.0156925	-0.374517	-0.224262	0.165727	-0.220792	-0.0437555	-0.141697
YBR092C	PHO3	Constitutively expressed acid phosphatase similar to Pho5p; brought to the cell surface by transport vesicles; hydrolyzes thiamin phosphates in the periplasmic space, increasing cellular thiamin uptake; expression is repressed by thiamin	2		0.0062152	-0.211565	1.0233	-2.1374	0.0627607	-0.100859	-0.388269	0.122581	-0.220849	-0.161697	0.0850077	-0.467838	-0.183581	-0.189295	-0.419216	1.0233
YBR093C	PHO5	Repressible acid phosphatase (1 of 3) that also mediates extracellular nucleotide-derived phosphate hydrolysis; secretory pathway derived cell surface glycoprotein; induced by phosphate starvation and coordinately regulated by PHO4 and PHO2	2		0.0891424	0.0122093	-0.112261	-2.03965	-0.186836	-0.144283	-1.04661	-3.80002	-1.41802	-0.201102	-0.15152	-2.13067	-0.947083	-1.27651	-1.69474	-0.112261
YBR094W	PBY1	Putative tubulin tyrosine ligase associated with P-bodies	2		0.165845	0.028837	0.956068	-0.215886	0.286721	0.111798	0.112605	0.19538	0.161989	0.310765	0.0536035	0.162958	0.0934112	0.36225	0.105296	0.956068
YBR095C	RXT2	Subunit of the histone deacetylase Rpd3L complex; possibly involved in cell fusion and invasive growth	2	Rpd3L complex	0.104286	-0.0544171	0.282568	0.143562	-0.0993076	-0.0592573	0.146614	-0.00394432	-0.0882292	0.113542	0.0943595	0.031283	0.178338	0.205918	0.21035	0.282568
YBR096W	YBR096W	Putative protein of unknown function; green fluorescent protein (GFP)-fusion protein localizes to the ER	2		0.25776	-0.0779614	1.33542	0.37232	0.201532	0.0201096	0.0949076	0.374661	0.326317	0.199948	-0.0615405	0.157266	0.561136	0.360445	0.426509	1.33542
YBR097W	VPS15	Myristoylated serine/threonine protein kinase involved in vacuolar protein sorting; functions as a membrane-associated complex with Vps34p; active form recruits Vps34p to the Golgi membrane; interacts with the GDP-bound form of Gpa1p	2	phosphatidylinositol (PtdIns) 3-kinase complex (functions in autophagy), phosphatidylinositol (PtdIns) 3-kinase complex (functions in CPY sorting)	0.0325696	1.10487	0.359258	-0.167118	0.460707	-0.0717607	0.260397	0.0384103	-0.124133	0.540769	-0.0206985	-0.24468	-0.281649	0.354121	-0.637274	0.359258
YBR101C	FES1	Hsp70 (Ssa1p) nucleotide exchange factor; cytosolic homolog of Sil1p, which is the nucleotide exchange factor for BiP (Kar2p) in the endoplasmic reticulum; protein abundance increases in response to DNA replication stress	2		0.032975	-0.234954	0.924697	0.395131	0.0986247	-0.0439267	-0.076043	0.182471	0.100214	-0.0242274	-0.0940785	-0.04513	0.364924	0.166105	0.173289	0.924697
YBR102C	EXO84	Essential protein with dual roles in spliceosome assembly and exocytosis; the exocyst complex (Sec3p, Sec5p, Sec6p, Sec8p, Sec10p, Sec15p, Exo70p, and Exo84p) mediates polarized targeting of secretory vesicles to active sites of exocytosis	2	Exocyst complex	0.0055965	-0.0901189	0.778988	0.0659308	0.163415	0.062101	0.0939837	0.159315	0.0370461	-0.0315445	0.0721793	0.133306	0.194631	0.146749	0.223127	0.778988
YBR103W	SIF2	WD40 repeat-containing subunit of the Set3C histone deacetylase complex, which represses early/middle sporulation genes; antagonizes telomeric silencing; binds specifically to the Sir4p N-terminus	2	Set3p complex	0.0129185	0.0364039	0.726583	0.185663	-0.137325	-0.150683	-0.0473749	-0.103172	-0.0833911	-0.171296	0.150651	-0.099227	0.0602873	-0.248718	0.202138	0.726583
YBR104W	YMC2	Mitochondrial protein, putative inner membrane transporter with a role in oleate metabolism and glutamate biosynthesis; member of the mitochondrial carrier (MCF) family; has similarity with Ymc1p	2		0.0411877	-0.101375	0.732761	-0.149028	0.0729095	-0.0170413	-0.191338	-0.118022	-0.0171492	0.753431	0.0016345	-0.386099	-0.0162298	-0.614791	-0.013771	0.732761
YBR106W	PHO88	Probable membrane protein, involved in phosphate transport; pho88 pho86 double null mutant exhibits enhanced synthesis of repressible acid phosphatase at high inorganic phosphate concentrations	2		0.0499798	-0.177979	1.06983	-0.374793	0.115765	0.0121195	0.135282	-0.033413	-0.0271335	0.238383	0.0194145	-0.313893	-0.0201988	-0.464953	-0.0970649	1.06983
YBR108W	AIM3	Protein interacting with Rvs167p; null mutant is viable and displays elevated frequency of mitochondrial genome loss	2		0.105049	-0.121605	1.2839	-0.0326444	0.287567	0.00514795	0.0264852	0.0915016	0.191874	0.216999	0.103648	-0.126562	0.127139	0.563964	0.031179	1.2839
YBR109C	CMD1	Calmodulin; Ca++ binding protein that regulates Ca++ independent processes (mitosis, bud growth, actin organization, endocytosis, etc.) and Ca++ dependent processes (stress-activated pathways), targets include Nuf1p, Myo2p and calcineurin	2	SPB components	-0.0185709	0.124214	0.898993	-0.170806	0.130874	-0.00488915	0.103365	-0.00751074	0.0174028	0.430518	-0.0081795	0.023226	0.057437	0.291194	0.019686	0.898993
YBR110W	ALG1	Mannosyltransferase, involved in asparagine-linked glycosylation in the endoplasmic reticulum (ER); essential for viability, mutation is functionally complemented by human ortholog	2		0.0297284	-0.0585733	0.956702	-0.112935	0.00400075	0.0674582	0.171634	0.300049	0.102459	0.192697	0.168503	0.261424	0.583966	0.0910465	0.244309	0.956702
YBR111C	YSA1	Nudix hydrolase family member with ADP-ribose pyrophosphatase activity; shown to metabolize O-acetyl-ADP-ribose to AMP and acetylated ribose 5'-phosphate	2		-0.0661326	0.260664	1.39303	-0.194882	0.632457	-0.036356	0.474321	0.412018	0.290214	-0.273608	-0.0794565	0.513108	0.0903501	0.144736	-0.32433	1.39303
YBR111W-A	SUS1	Component of both the SAGA histone acetylase and TREX-2 complexes; interacts with RNA polymerase II; involved in mRNA export coupled transcription activation and elongation; involved in post-transcriptional tethering of active genes to the nuclear periphery and to non-nascent mRNP	2	SAGA complex	0.125343	0.174041	0.42394	-0.122445	0.159707	0.0237803	-0.310209	-0.255276	0.0597958	0.0476208	0.127288	-0.309851	-0.282465	-0.436393	-0.0970834	0.42394
YBR112C	CYC8	General transcriptional co-repressor, acts together with Tup1p; also acts as part of a transcriptional co-activator complex that recruits the SWI/SNF and SAGA complexes to promoters; can form the prion [OCT+]	2	Sko1p/Cyc8p/Tup1 repressor complex, Tup1p/Ssn6p complex	0.0027733	0.0065605	0.369764	-0.268094	-0.290194	0.0119786	-0.1606	-0.152976	-0.114452	-0.347337	0.0047895	0.201746	-0.0900561	-0.14414	0.039712	0.369764
YBR114W	RAD16	Protein that recognizes and binds damaged DNA in an ATP-dependent manner (with Rad7p) during nucleotide excision repair; subunit of Nucleotide Excision Repair Factor 4 (NEF4) and the Elongin-Cullin-Socs (ECS) ligase complex	2	nucleotide-excision repair factor 4 complex, Cul3p-RING ubiquitin ligase complex											-0.24647	-0.013771	-0.291886	0.0328685	0.019697
YBR117C	TKL2	Transketolase; catalyzes conversion of xylulose-5-phosphate and ribose-5-phosphate to sedoheptulose-7-phosphate and glyceraldehyde-3-phosphate in the pentose phosphate pathway; needed for synthesis of aromatic amino acids; TKL2 has a paralog, TKL1, that arose from the whole genome duplication	2		0.0404901	-0.150973	-0.240011	-0.512409	-0.245291	-0.224928	7.01e-05	-0.588929	0.11142	-0.0521186	-0.160005	-0.579328	-0.762679	-0.795848	0.174422	-0.240011
YBR118W	TEF2	Translational elongation factor EF-1 alpha; also encoded by TEF1; functions in the binding reaction of aminoacyl-tRNA (AA-tRNA) to ribosomes; may also have a role in tRNA re-export from the nucleus	2	eEF1	-0.008459	-0.0221782	0.570492	-0.149566	0.0403741	-0.0203086	0.128444	-0.0568899	-0.0181481	-0.0522737	-0.033797	-0.0736965	0.0080982	-0.27389	0.547548	0.570492
YBR119W	MUD1	U1 snRNP A protein, homolog of human U1-A; involved in nuclear mRNA splicing	2	commitment complex, U1 snRNP complex	0.0147795	0.0132384	0.240787	0.150149	-0.0890077	0.124224	0.136501	0.0607736	-0.0620453	-0.0284253	-0.215036	-0.020741	-0.0330662	0.108917	0.05724	0.240787
YBR120C	CBP6	Mitochondrial protein required for translation of the COB mRNA; forms a complex with Cbp3p that binds to mt ribosomes near the polypeptide tunnel exit and promotes efficient translation of the COB mRNA; Cbp3p-Cbp6p complex also interacts with newly synthesized cytochrome b (Cobp) and Cbp4p to promote assembly of Cobp into the cytochrome bc1 complex	2		-0.0104626	0.0903829	0.508225	0.17702	-0.208499	0.0377718	0.0449428	-0.498123	0.271786	-0.205848	-0.0830785	0.53328	-0.0689103	0.615979	0.015931	0.508225
YBR121C	GRS1	Cytoplasmic and mitochondrial glycyl-tRNA synthase that ligates glycine to the cognate anticodon bearing tRNA; transcription termination factor that may interact with the 3'-end of pre-mRNA to promote 3'-end formation	2		-0.0144341	-0.171672	0.883994	-0.392025	-0.113126	-0.0675876	-0.132016	-0.163946	0.0212321	-0.118542	0.0264295	-0.193297	-0.0487549	-0.438246	-0.121992	0.883994
YBR122C	MRPL36	Mitochondrial ribosomal protein of the large subunit; overproduction suppresses mutations in the COX2 leader peptide-encoding region	2	mitochondrial ribosomal large subunit	-0.144142	0.11609	0.490844	-0.184662	-0.280824	0.341976	0.0006592	-0.0582989	0.136079	-0.528134	-0.0857905	0.307585	-0.262089	0.0621065	-0.0745055	0.490844
YBR123C	TFC1	One of six subunits of the RNA polymerase III transcription initiation factor complex (TFIIIC); part of the TauA globular domain of TFIIIC that binds DNA at the BoxA promoter sites of tRNA and similar genes; human homolog is TFIIIC-63	2	transcription factor TFIIIC complex	-0.0009787	0.124393	0.663804	-0.0037134	0.0792146	0.381297	0.0156435	0.235438	-0.0231664	0.213036	0.127087	0.024931	0.314665	-0.0036755	0.212945	0.663804
YBR126C	TPS1	Synthase subunit of trehalose-6-P synthase/phosphatase complex; synthesizes the storage carbohydrate trehalose; also found in a monomeric form; expression is induced by the stress response and repressed by the Ras-cAMP pathway; protein abundance increases in response to DNA replication stress	2	alpha,alpha-trehalose-phosphate synthase complex (UDP-forming)	-0.0525039	0.0511509	1.14769	-0.146017	0.0486647	-0.0180594	0.0609747	0.097152	-0.0697373	-0.393452	-0.0319835	0.654183	-0.0246566	0.45349	-0.132225	1.14769
YBR126W-A	YBR126W-A	Protein of unknown function; identified by gene-trapping, microarray analysis, and genome-wide homology searches; mRNA identified as translated by ribosome profiling data; partially overlaps the dubious ORF YBR126W-B	2		-0.0490892	0.135918	0.332029	0.321222	-0.128354	-0.0489551	0.197431	0.596374	-0.186974	-0.326071	0.10609	-0.192446	-0.623975	-0.807133	0.228224	0.332029
YBR127C	VMA2	Subunit B of the eight-subunit V1 peripheral membrane domain of the vacuolar H+-ATPase (V-ATPase), an electrogenic proton pump found throughout the endomembrane system; contains nucleotide binding sites; also detected in the cytoplasm; protein abundance increases in response to DNA replication stress	2	H+-transporting ATPase, vacuolar, H+-transporting ATPase, Golgi	-0.0015895	-0.091055	0.731801	-0.381112	-0.111697	-0.0191846	-0.121141	-0.164597	-0.263157	0.122381	-0.0644755	-0.398005	-0.0786721	-0.440332	-0.27029	0.731801
YBR129C	OPY1	Protein of unknown function, overproduction blocks cell cycle arrest in the presence of mating pheromone; the authentic, non-tagged protein is detected in highly purified mitochondria in high-throughput studies	2							-0.0897087	0.100471	-0.372655	0.0855296	-0.78946	0.167437	0.210613	0.248755	-0.128087	0.171895
YBR130C	SHE3	Protein that acts as an adaptor between Myo4p and the She2p-mRNA complex; part of the mRNA localization machinery that restricts accumulation of certain proteins to the bud; also required for cortical ER inheritance	2		0.0072406	-0.0271293	0.81067	0.0342897	-0.025584	-0.0327176	-0.0786355	0.0181975	-0.1748	0.0945737	0.0266465	-0.081866	0.0516591	-0.0838735	-0.039618	0.81067
YBR131W	CCZ1	Protein involved in vacuolar assembly, essential for autophagy and the cytoplasm-to-vacuole pathway	2	Mon1p/Ccz1p complex	0.389739	-0.200057	1.6797	0.0220148	-0.00763986	0.0399856	-0.250468	0.0486784	-0.464898	-0.198952	0.0670755	0.059231	0.198122	-0.13827	0.072233	1.6797
YBR132C	AGP2	High affinity polyamine permease, preferentially uses spermidine over putrescine; expression is down-regulated by osmotic stress; plasma membrane carnitine transporter, also functions as a low-affinity amino acid permease	2		-0.0456568	-0.0399097	1.28341	-0.395596	0.451913						-0.0853445	0.614737	0.504363	1.01385	0.209417	1.28341
YBR133C	HSL7	Protein arginine N-methyltransferase that exhibits septin and Hsl1p-dependent bud neck localization and periodic Hsl1p-dependent phosphorylation; required along with Hsl1p for bud neck recruitment, phosphorylation, and degradation of Swe1p	2		-0.11301	0.0420666	0.901429	-0.090088	0.0341948	0.279982	-0.0102843	0.183322	0.218881	0.219929	0.135703	-0.18412	0.137451	0.391437	-0.030828	0.901429
YBR136W	MEC1	Genome integrity checkpoint protein and PI kinase superfamily member; signal transducer required for cell cycle arrest and transcriptional responses prompted by damaged or unreplicated DNA; regulates P-body formation induced by replication stress; monitors and participates in meiotic recombination; associates with shortened, dysfunctional telomeres	2		0.102242	-0.00241865	0.0621144	-0.189268	0.960131						-0.057634	-0.0713175	0.000864	-0.043674	-0.110367	0.0621144
YBR138C	YBR138C	Cytoplasmic protein of unknown function, potentially phosphorylated by Cdc28p; YBR138C is not an essential gene	2		-0.0126001	0.0066993	0.969361	0.385918	0.418094						0.208394	0.09527	0.366547	0.0701545	0.224562	0.969361
YBR139W	YBR139W	Putative serine type carboxypeptidase with a role in phytochelatin synthesis; green fluorescent protein (GFP)-fusion protein localizes to the vacuole; expression induced by nitrogen limitation in a GLN3, GAT1-independent manner	2		-0.0861744	-0.090342	0.818495	-0.367281	-0.244859	-0.03644	-0.0256111	0.153273	-0.0949982	-0.179325	-0.123344	0.297322	-0.0994351	0.384905	-0.0573964	0.818495
YBR140C	IRA1	GTPase-activating protein that negatively regulates RAS by converting it from the GTP- to the GDP-bound inactive form, required for reducing cAMP levels under nutrient limiting conditions, mediates membrane association of adenylate cyclase	2		-0.338792	0.137702	0.89847	-0.0693628	0.153222	0.0353365	0.0202341	0.184813	-0.144147	-0.34555	-0.10665	-0.043095	-0.245195	0.22942	-0.176768	0.89847
YBR141C	YBR141C	Putative S-adenosylmethionine-dependent methyltransferase; green fluorescent protein (GFP)-fusion protein localizes to the nucleolus; YBR141C is not an essential gene	2		-0.0126284	0.351646	0.931148	0.580314	0.0182191	0.182134	-0.0684039	0.276229	0.0245184	0.111669	0.0009405	0.319054	0.210852	0.0010625	0.09849	0.931148
YBR142W	MAK5	Essential nucleolar protein, putative DEAD-box RNA helicase required for maintenance of M1 dsRNA virus; involved in biogenesis of large (60S) ribosomal subunits	2		-0.0568897	-0.0490548	0.801156	-0.0025666	0.0933357	0.0623346	0.034249	-0.0664809	-0.0340435	0.0216233	-0.0098325	-0.029517	0.0347776	-0.297664	-0.0985898	0.801156
YBR143C	SUP45	Polypeptide release factor (eRF1) in translation termination; mutant form acts as a recessive omnipotent suppressor; methylated by Mtq2p-Trm112p in ternary complex eRF1-eRF3-GTP; mutation of methylation site confers resistance to zymocin	2	translation release factor complex	-0.0123302	-0.154621	0.834799	-0.274093	-0.172684	-0.0515818	-0.0864857	-0.14405	-0.135758	-0.115304	-0.0397325	-0.162929	-0.121837	-0.49303	-0.114816	0.834799
YBR145W	ADH5	Alcohol dehydrogenase isoenzyme V; involved in ethanol production; ADH5 has a paralog, ADH1, that arose from the whole genome duplication	2		0.239478	-0.271978	0.192697	0.149578	-0.180632	0.0756421	-0.335402	-1.093	0.640454	1.47013	0.0842066	-0.862173	0.681753	-1.29172	-0.8364	0.192697
YBR146W	MRPS9	Mitochondrial ribosomal protein of the small subunit	2	mitochondrial ribosomal small subunit	0.0030212	0.0229987	0.581575	-0.0924952	-0.153508	0.106372	0.0549804	-0.0168779	0.253507	-0.91305	-0.0676815	0.367928	-0.141239	0.433977	-0.101295	0.581575
YBR149W	ARA1	NADP+ dependent arabinose dehydrogenase, involved in carbohydrate metabolism; purified as homodimer; naturally occurs with a N-terminus degradation product	2		0.0645918	-0.021803	1.2454	-0.0088361	0.16084	-0.0205765	0.0267349	0.154496	0.142095	-0.646361	-0.0221325	0.714523	0.230847	0.976136	-0.154133	1.2454
YBR151W	APD1	Protein of unknown function, required for normal localization of actin patches and for normal tolerance of sodium ions and hydrogen peroxide; localizes to both cytoplasm and nucleus	2		-0.0709844	-0.154734	1.07096	-0.398086	-0.197731	0.053761	0.0290098	0.0581255	0.126361	0.0450247	-0.0307335	-0.103701	-0.100189	0.321848	0.107653	1.07096
YBR152W	SPP381	mRNA splicing factor, component of U4/U6.U5 tri-snRNP; interacts genetically and physically with Prp38p	2	U4/U6 x U5 tri-snRNP complex	0.159679	0.0555419	1.00286	0.0230429	0.0402255	0.213665	-0.17719	-0.217489	-0.0112087	-0.0453136	0.0250385	-0.058965	-0.254802	-0.398545	-0.155718	1.00286
YBR153W	RIB7	Diaminohydroxyphoshoribosylaminopyrimidine deaminase; catalyzes the second step of the riboflavin biosynthesis pathway	2		0.0298918	0.233643	0.607515	0.109963	-0.0613006						-0.262118	-0.061923	-0.459818	0.430552	0.050382	0.607515
YBR154C	RPB5	RNA polymerase subunit ABC27, common to RNA polymerases I, II, and III; contacts DNA and affects transactivation	2	DNA-directed RNA polymerase II complex, DNA-directed RNA polymerase I complex, DNA-directed RNA polymerase III complex	0.0555748	-0.0559257	0.929295	-0.298898	-0.00483511	0.0399856	0.0546576	-0.333134	-0.0136884	0.188357	0.0172365	-0.157546	-0.155935	-0.134939	0.022457	0.929295
YBR155W	CNS1	TPR-containing co-chaperone; binds both Hsp82p (Hsp90) and Ssa1p (Hsp70) and stimulates the ATPase activity of SSA1, ts mutants reduce Hsp82p function while over expression suppresses the phenotypes of an HSP82 ts allele and a cpr7 deletion	2		-0.0417634	-0.262061	0.732632	-0.369247	0.156305	-0.0518845	-0.0845486	-0.117174	-0.0460136	-0.0550741	-0.0143095	-0.213845	-0.0850891	-0.655739	-0.230845	0.732632
YBR156C	SLI15	Subunit of the conserved chromosomal passenger complex (CPC; Ipl1p-Sli15p-Bir1p-Nbl1p), which regulates kinetochore-microtubule attachments, activation of the spindle tension checkpoint, and mitotic spindle disassembly	2	Sli15p/Bir1p complex, Aurora B-INCENP protein kinase complex						-0.0879447	-0.187399	0.0343829	0.244123	0.192206	0.0302685	0.044711	0.0239472	0.159217	-0.103796
YBR158W	AMN1	Protein required for daughter cell separation, multiple mitotic checkpoints, and chromosome stability; contains 12 degenerate leucine-rich repeat motifs; expression is induced by the Mitotic Exit Network (MEN)	2												0.0705602	0.227603	-0.0296626	-0.0002825	-0.145262
YBR159W	IFA38	Microsomal beta-keto-reductase; contains oleate response element (ORE) sequence in the promoter region; mutants exhibit reduced VLCFA synthesis, accumulate high levels of dihydrosphingosine, phytosphingosine and medium-chain ceramides	2		-0.0631443	0.0875689	0.909985	0.417858	-0.0637771	0.0648795	0.108041	0.259843	-0.21142	0.0340538	-0.133773	0.049503	-0.0170795	0.0275915	0.201391	0.909985
YBR160W	CDC28	Catalytic subunit of the main cell cycle cyclin-dependent kinase (CDK); alternately associates with G1 cyclins (CLNs) and G2/M cyclins (CLBs) which direct the CDK to specific substrates; involved in modulating membrane trafficking dynamics; protein abundance increases in response to DNA replication stress	2	Cdc28p/Clb5p complex, Cdc28p/Cln2p complex, Cdc28p/Clb1p complex, Cdc28p/Clb6p complex, Cdc28p/Cln1p complex, Cdc28p/Clb3p complex, Cdc28p/Cln3p complex, Cdc28p/Clb4p complex, Cdc28p/Clb2p complex	-0.028124	0.117999	1.1581	-0.124187	0.00545525	0.0249953	0.0581528	0.0915857	-0.0171989	0.541263	-0.0354805	-0.110798	-0.0260977	0.385883	0.313913	1.1581
YBR162C	TOS1	Covalently-bound cell wall protein of unknown function; identified as a cell cycle regulated SBF target gene; deletion mutants are highly resistant to treatment with beta-1,3-glucanase; has sequence similarity to YJL171C	2		-0.0391306	-0.146675	1.02861	-0.137371	-0.513151	0.0503207	-0.114418	-0.37885	-0.19407	0.118719	0.0032205	-0.534496	1.01904	-0.154498	0.05944	1.02861
YBR164C	ARL1	Soluble GTPase with a role in regulation of membrane traffic; regulates potassium influx; G protein of the Ras superfamily, similar to ADP-ribosylation factor	2		-0.265143	0.259036	1.48621	-0.0400851	-0.0505941	-0.160707	0.298691	0.00445482	-0.340649	0.209674	-0.0269315	0.417206	0.382521	0.498003	0.443791	1.48621
YBR165W	UBS1	Ubiquitin-conjugating enzyme suppressor that functions as a general positive regulator of Cdc34p activity; nuclear protein that may represent a link between nucleocytoplasmic transport and ubiquitin ligase activity	2		0.0940275	0.199731	0.828549	0.190479	-0.0860854											0.828549
YBR166C	TYR1	Prephenate dehydrogenase involved in tyrosine biosynthesis, expression is dependent on phenylalanine levels	2		-0.0988544	-0.0601219	0.948171	0.0923368	0.0907738	0.00294205	0.0433694	0.119306	0.434549	0.669113	0.0254705	-0.210711	0.277638	0.263739	0.185859	0.948171
YBR167C	POP7	Subunit of both RNase MRP and nuclear RNase P; RNase MRP cleaves pre-rRNA, while nuclear RNase P cleaves tRNA precursors to generate mature 5' ends and facilitates turnover of nuclear RNAs	2	nucleolar ribonuclease P complex, ribonuclease MRP complex	0.19883	0.246984	0.465675	0.228583	0.234304	-0.0773206	-0.218274	-0.210613	0.273401	-0.0176162	-0.0152495	-0.047668	-0.137967	0.204224	0.0179	0.465675
YBR169C	SSE2	Member of the heat shock protein 70 (HSP70) family; may be involved in protein folding; localized to the cytoplasm; highly homologous to the heat shock protein Sse1p	2		0.0625316	0.143914	0.724771	-0.190276	0.200707	-0.0377015	0.338421	-0.121417	-0.163377	-0.448063	0.0235895	-0.17804	0.393705	0.518776	0.088798	0.724771
YBR170C	NPL4	Substrate-recruiting cofactor of the Cdc48p-Npl4p-Ufd1p segregase; assists Cdc48p in the dislocation of misfolded, polyubiquitinated ERAD substrates that are subsequently delivered to the proteasome for degradation; also involved in the regulated destruction of resident ER membrane proteins, such as HMG-CoA reductase (Hmg1/2p) and cytoplasmic proteins (Fbp1p); role in mobilizing membrane bound tr…	2	Cdc48p complex	0.0251242	0.0430985	1.21042	-0.0965836	0.170507	0.00798375	0.137404	0.108274	0.107474	0.25702	-0.0497905	0.141834	0.267389	0.18913	0.090657	1.21042
YBR171W	SEC66	Non-essential subunit of Sec63 complex (Sec63p, Sec62p, Sec66p and Sec72p); with Sec61 complex, Kar2p/BiP and Lhs1p forms a channel competent for SRP-dependent and post-translational SRP-independent protein targeting and import into the ER	2	Sec62p/Sec63p complex	0.0057904	-0.108966	-0.00844075	0.188859	0.0129822	0.00456555	-0.0469034	0.150588	0.0399706	0.0964436	0.0647255	0.073759	0.28849	0.0895435	0.089006	-0.00844075
YBR172C	SMY2	Protein of unknown function involved in COPII vesicle formation; interacts with the Sec23p/Sec24p subcomplex; overexpression suppresses the temperature sensitivity of a myo2 mutant; has similarity to S. pombe Mpd2	2		0.021625	0.0233001	0.976585	-0.330915	-0.115388	-0.0310421	-0.193038	-0.312185	0.0151009	0.0805436	0.0336095	-0.207484	-0.101254	-0.0750455	-0.207092	0.976585
YBR173C	UMP1	Short-lived chaperone required for correct maturation of the 20S proteasome; may inhibit premature dimerization of proteasome half-mers; degraded by proteasome upon completion of its assembly	2		0.0366201	-0.898904	1.91568	1.14062	-0.197178	-0.103308	0.501354	0.421872	-0.51896	0.177163	-0.0353325	-0.379142	0.673588	0.461717	-0.15265	1.91568
YBR175W	SWD3	Essential subunit of the COMPASS (Set1C) complex, which methylates histone H3 on lysine 4 and is required in transcriptional silencing near telomeres; WD40 beta propeller superfamily member and ortholog of mammalian WDR5	2	COMPASS complex	0.125425	0.0251393	1.03158	0.243799	0.0963717	0.157014	0.13291	0.136839	0.0442132	0.0900865	0.122325	0.237113	0.0394771	-0.168824	0.202292	1.03158
YBR176W	ECM31	Ketopantoate hydroxymethyltransferase, required for pantothenic acid biosynthesis, converts 2-oxoisovalerate into 2-dehydropantoate	2		0.15851	-0.112587	0.874929	-0.252616	0.280754	-0.0585852	-0.107959	-0.0113238	-0.0764963	0.194472	-0.101885	-0.024635	-0.0266161	-0.0182365	-0.0890496	0.874929
YBR177C	EHT1	Acyl-coenzymeA:ethanol O-acyltransferase that plays a minor role in medium-chain fatty acid ethyl ester biosynthesis; possesses short-chain esterase activity; localizes to lipid particles and the mitochondrial outer membrane	2		-0.0205817	0.174518	0.698392	0.731247	-0.288113	-0.0776967	0.385465	-0.107209	0.296351	0.271435	-0.0693565	-0.004144	-0.390078	-0.0230515	0.009456	0.698392
YBR179C	FZO1	Mitofusin; integral membrane protein involved in mitochondrial outer membrane tethering and fusion; role in mitochondrial genome maintenance; efficient tethering and degradation of Fzo1p requires an intact N-terminal GTPase domain; targeted for destruction by the ubiquitin ligase SCF-Mdm30p and the cytosolic ubiquitin-proteasome system	2	Mgm1p/Ugo1p/Fzo1p complex	0.0564556	0.0725689	1.01905	0.128028	0.0288048	0.349909	0.0946121	0.4799	0.161737	-0.125821	0.113744	0.530971	0.242796	0.55892	0.337627	1.01905
YBR181C	RPS6B	Protein component of the small (40S) ribosomal subunit; homologous to mammalian ribosomal protein S6, no bacterial homolog; RPS6B has a paralog, RPS6A, that arose from the whole genome duplication	2	cytoplasmic ribosomal small subunit	0.0240979	-0.122822	-0.123523	-0.210401	-0.129785	-0.009806	-0.0661513	-0.11393	-0.0675114	-0.0515536	0.02727	-0.366625	-0.081233	-0.500715	-0.202358	-0.123523
YBR185C	MBA1	Membrane-associated mitochondrial ribosome receptor; forms a complex with Mdm38p that may facilitate recruitment of mRNA-specific translational activators to ribosomes; possible role in protein export from the matrix to inner membrane	2							0.158403	-0.001224	0.14925	0.229458	-0.972378	-0.223749	0.377828	-0.376589	0.653765	-0.140578
YBR188C	NTC20	Member of the NineTeen Complex (NTC) that contains Prp19p and stabilizes U6 snRNA in catalytic forms of the spliceosome containing U2, U5, and U6 snRNAs	2	Prp19-associated complex	-0.167953	-0.0951025	0.654506	-0.179239	-0.0113582	-0.00213655	-0.110336	0.00240914	0.216346	-0.0121173	0.114795	-0.265999	-0.0288181	0.126933	-0.023413	0.654506
YBR189W	RPS9B	Protein component of the small (40S) ribosomal subunit; homologous to mammalian ribosomal protein S9 and bacterial S4; RPS9B has a paralog, RPS9A, that arose from the whole genome duplication	2	cytoplasmic ribosomal small subunit	-0.0700434	1.0481	0.947331	1.64368	0.869808	-0.0569153	1.08071	0.912648	0.354973	0.876026	0.181032	0.076535	0.851001	-0.0189985	0.288403	0.947331
YBR191W	RPL21A	Ribosomal 60S subunit protein L21A; homologous to mammalian ribosomal protein L21, no bacterial homolog; RPL21A has a paralog, RPL21B, that arose from the whole genome duplication	2	cytoplasmic ribosomal large subunit	-0.0556097	0.240265	0.36585	0.129211	0.211285	-0.110882	0.181832	0.0241829	0.483988	0.065426	0.0266645	-0.483283	0.126182	-0.233788	-0.494623	0.36585
YBR192W	RIM2	Mitochondrial pyrimidine nucleotide transporter; imports pyrimidine nucleoside triphosphates and exports pyrimidine nucleoside monophosphates; member of the mitochondrial carrier family	2		0.0406387	-0.100202	1.07468	-0.302853	-0.182232	-0.029724	-0.0120935	-0.160408	0.152397	-0.61118	-0.0046105	0.441531	-0.0922081	0.235405	-0.136724	1.07468
YBR193C	MED8	Subunit of the RNA polymerase II mediator complex; associates with core polymerase subunits to form the RNA polymerase II holoenzyme; essential for transcriptional regulation	2	Kornberg's mediator (SRB) complex	0.526804	0.160873	1.02355	-0.183148	0.586368	-0.0842417	-0.397589	-0.237908	0.169762	-0.174475	-0.0223675	-0.07001	-0.239404	-0.0322945	0.063553	1.02355
YBR194W	AIM4	Protein proposed to be associated with the nuclear pore complex; null mutant is viable, displays elevated frequency of mitochondrial genome loss and is sensitive to freeze-thaw stress	2							0.0114835	0.0755066	0.173625	0.620351	-0.116102	-0.0094185	0.187454	0.0561318	0.128454	0.563303
YBR195C	MSI1	Subunit of chromatin assembly factor I (CAF-1); chromatin assembly by CAF-1 is important for multiple processes including silencing at telomeres, mating type loci, and rDNA; maintenance of kinetochore structure; deactivation of the DNA damage checkpoint after DNA repair; and chromatin dynamics during transcription; Msi1p localizes to both nucleus and cytoplasm and has an independent role as a neg…	2	chromatin assembly complex	-0.104699	0.0607919	0.649928	0.144834	-0.115254	0.167953	-0.0461506	-0.306995	-0.344472	-0.351014	0.145185	0.471171	-0.344021	-0.36903	-0.027135	0.649928
YBR196C	PGI1	Glycolytic enzyme phosphoglucose isomerase, catalyzes the interconversion of glucose-6-phosphate and fructose-6-phosphate; required for cell cycle progression and completion of the gluconeogenic events of sporulation	2		-0.0026575	-0.0278813	0.859902	-0.481182	-0.0132405	-0.0515008	0.0567897	-0.118606	0.0255626	0.178163	-0.0397645	-0.448854	-0.0148672	-0.396769	-0.386104	0.859902
YBR197C	YBR197C	Putative protein of unknown function; green fluorescent protein (GFP)-fusion protein localizes to the cytoplasm and nucleus; YBR197C is not an essential gene	2		0.0668921	-0.223801	0.832267	-0.130038	0.145176	-0.0452703	-0.453122	0.106127	-0.308367	0.399719	0.214737	-0.129545	-0.0833411	-0.105583	0.148883	0.832267
YBR198C	TAF5	Subunit (90 kDa) of TFIID and SAGA complexes, involved in RNA polymerase II transcription initiation and in chromatin modification	2	transcription factor TFIID complex, SAGA complex, SLIK (SAGA-like) complex	0.0322867	0.0556989	0.91349	-0.112325	-0.114808	0.085935	-0.115116	-0.261705	-0.173782	-0.0733807	0.0130665	0.035515	0.118699	-0.206623	0.081437	0.91349
YBR199W	KTR4	Putative mannosyltransferase involved in protein glycosylation; member of the KRE2/MNT1 mannosyltransferase family	2		-0.123214	-0.314093	0.868063	-0.0061619	-0.0676989	-0.0374834	0.103487	0.112973	-0.035751	-0.0755013	0.0426945	0.079607	-0.0953151	0.23103	0.113198	0.868063
YBR200W	BEM1	Protein containing SH3-domains, involved in establishing cell polarity and morphogenesis; functions as a scaffold protein for complexes that include Cdc24p, Ste5p, Ste20p, and Rsr1p	2		0.115403	-0.0481002	1.18074	-0.0937633	0.0548184	-0.013879	-0.169264	-0.092317	-0.0874131	-0.0693916	0.135983	-0.118281	0.0323929	-0.119129	0.029994	1.18074
YBR202W	MCM7	Component of the heterohexameric MCM2-7 complex, which primes origins of DNA replication in G1 and becomes an active ATP-dependent helicase that promotes DNA melting and elongation in S-phase; forms an Mcm4p-6p-7p subcomplex	2	Mcm2-7 complex	0.251616	0.0745139	1.23137	-0.259992	0.160904	0.0960166	0.0533234	0.12589	-0.153047	0.176942	-0.0616755	-0.169695	-0.0712893	0.223126	0.073018	1.23137
YBR204C	YBR204C	Serine hydrolase; exhibits active esterase plus weak triacylglycerol lipase activities; proposed role in lipid homeostasis, regulating phospholipid and non-polar lipid levels and required for mobilization of LD-stored lipids; localizes to the lipid droplet (LD) surface; contains a classical serine containing catalytic triad (GxSxG motif)	2		-0.184775	0.118955	1.07251	0.0360788	0.104375	-0.193779	0.246124	0.00595114	0.10281	-0.0316	-0.0430025	0.239662	0.207474	0.600661	0.081933	1.07251
YBR205W	KTR3	Putative alpha-1,2-mannosyltransferase involved in O- and N-linked protein glycosylation; member of the KRE2/MNT1 mannosyltransferase family; Svp26p mediates uptake of Ktr3p into COPII vesicles	2		-0.116613	-0.216024	0.690595	-0.556437	-0.168104	0.218014	-0.136424	0.0471515	-0.229039	-0.182213	0.148354	-0.076151	-0.142663	-0.0768955	0.054761	0.690595
YBR207W	FTH1	Putative high affinity iron transporter; involved in transport of intravacuolar stores of iron; forms complex with Fet5p; expression is regulated by iron; proposed to play indirect role in endocytosis; protein abundance increases in response to DNA replication stress	2	Fth1p/Fet5p complex											0.112206	-0.038811	0.190127	0.397465	0.167577
YBR208C	DUR1	Urea amidolyase; contains both urea carboxylase and allophanate hydrolase activities, degrades urea to CO2 and NH3; expression sensitive to nitrogen catabolite repression and induced by allophanate, an intermediate in allantoin degradation; protein abundance increases in response to DNA replication stress	2		-0.019766	0.0630859	-0.266071	1.02186	0.228193	0.00259765	0.432587	-0.494294	-0.410398	-0.588159	0.0536045	-1.9047	-0.254547	-1.90456	-1.82039	-0.266071
YBR212W	NGR1	RNA binding protein that negatively regulates growth rate; interacts with the 3' UTR of the mitochondrial porin (POR1) mRNA and enhances its degradation; overexpression impairs mitochondrial function; interacts with Dhh1p to mediate POR1 mRNA decay; expressed in stationary phase	2		0.138613	-0.100869	0.972722	-0.262169	-0.156182	0.115711	-0.377536	0.251694	0.0295298	-0.379356	-0.0733635	0.244286	0.211091	0.27346	-0.123732	0.972722
YBR213W	MET8	Bifunctional dehydrogenase and ferrochelatase, involved in the biosynthesis of siroheme, a prosthetic group used by sulfite reductase; required for sulfate assimilation and methionine biosynthesis	2		0.219728	-0.483691	-0.40209	-1.68615	-1.28782	0.0353343	0.436074	-0.0193588	0.109665	0.196187	8.25e-05	-0.08343	-0.182847	-0.292861	-0.547754	-0.40209
YBR214W	SDS24	Protein involved in cell separation during budding; one of two S. cerevisiae homologs (Sds23p and Sds24p) of the S. pombe Sds23 protein, which is implicated in APC/cyclosome regulation; may play an indirect role in fluid-phase endocytosis; protein abundance increases in response to DNA replication stress	2		-0.0045023	0.183856	1.04793	0.0889438	-0.0846129	0.0511667	0.16672	-0.185303	-0.154367	-0.418353	-0.0123245	-0.012056	0.345359	0.727235	-0.500491	1.04793
YBR215W	HPC2	Subunit of the HIR complex, a nucleosome assembly complex involved in regulation of histone gene transcription; mutants display synthetic defects with subunits of FACT, a complex that allows passage of RNA Pol II through nucleosomes	2	HIR complex	0.0486164	-0.0023933	0.362621	-0.197386	0.0957777	0.019665	-0.199423	-0.109515	-0.0638263	0.0943677	0.0096275	-0.138369	0.0256441	0.159217	-0.0781414	0.362621
YBR218C	PYC2	Pyruvate carboxylase isoform, cytoplasmic enzyme that converts pyruvate to oxaloacetate; highly similar to isoform Pyc1p but differentially regulated; mutations in the human homolog are associated with lactic acidosis	2		-0.0774544	-0.235924	0.326598	-0.395856	-0.0315937	-0.0452565	-0.223551	-0.383894	0.0549977	0.390919	0.0092975	-0.586044	0.539902	-0.717448	-0.598579	0.326598
YBR221C	PDB1	E1 beta subunit of the pyruvate dehydrogenase (PDH) complex, which is an evolutionarily-conserved multi-protein complex found in mitochondria	2	mitochondrial pyruvate dehydrogenase complex	0.0362172	-0.121521	0.581987	-0.137877	-0.0821253	0.0221378	-0.0049569	-0.218039	0.257606	-0.225647	-0.0154655	-0.20272	0.131709	-0.236756	-0.0795433	0.581987
YBR222C	PCS60	Peroxisomal protein that binds AMP and mRNA, localizes to both the peroxisomal peripheral membrane and matrix, expression is highly inducible by oleic acid, similar to E. coli long chain acyl-CoA synthetase	2		-0.148589	0.114616	1.13122	-0.254113	0.0289032	-0.0269224	0.21991	0.375689	0.586338	0.514161	-0.0951065	-0.506964	0.584799	0.254456	0.14511	1.13122
YBR223C	TDP1	Tyrosyl-DNA phosphodiesterase I; hydrolyzes 3' and 5'-phosphotyrosyl bonds; involved in the repair of DNA lesions created by topoisomerase I and topoisomerase II; mutations in human homolog result in the neurodegenerative disease SCANI	2							-0.118232	0.221227	-0.681487	0.305006	-0.39723	0.0738951	0.193479	0.813506	0.404098	0.254359
YBR225W	YBR225W	Putative protein of unknown function; non-essential gene identified in a screen for mutants affected in mannosylphophorylation of cell wall components	2		0.0143996	-0.0657291	1.07986	-0.182707	0.272373	0.0494101	0.0200165	0.318747	0.26959	0.098891	-0.0187545	0.036035	0.261415	0.456343	0.255395	1.07986
YBR227C	MCX1	Mitochondrial matrix protein; putative ATP-binding chaperone with non-proteolytic function; similar to bacterial ClpX proteins	2		-0.0435884	-0.210061	0.899517	0.009894	0.00119597	-0.0423404	-0.0233397	-0.0927609	-0.104728	0.20041	0.0266035	0.027744	0.441072	-0.165307	0.065931	0.899517
YBR229C	ROT2	Glucosidase II catalytic subunit required for normal cell wall synthesis; mutations in rot2 suppress tor2 mutations, and are synthetically lethal with rot1 mutations	2	Rot2p/Gtb1p complex	-0.0362305	-0.156082	0.900914	-0.0750691	0.11627	0.129492	-0.167025	0.524622	-0.0275905	-0.10147	0.127185	0.111418	0.555984	0.12724	0.294521	0.900914
YBR230C	OM14	Integral mitochondrial outer membrane protein; abundance is decreased in cells grown in glucose relative to other carbon sources; appears to contain 3 alpha-helical transmembrane segments; ORF encodes a 97-basepair intron	2		0.068033	-0.0597708	1.30051	-0.455178	0.00858225	0.0197828	0.23554	0.447859	0.13038	-0.376719	-0.0091635	0.431667	-0.725597	0.537565	-0.375231	1.30051
YBR230W-A	YBR230W-A	Putative protein of unknown function; YBR230W-A has a paralog, COQ8, that arose from the whole genome duplication	2							-0.257405	0.132106	0.183158	0.161245	-0.0515443	-0.0113045	-0.245202	0.084189	-0.153314	-0.100374
YBR231C	SWC5	Component of the SWR1 complex; complex exchanges histone variant H2AZ (Htz1p) for chromatin-bound histone H2A; protein abundance increases in response to DNA replication stress	2	Swr1p complex	-0.0960184	-0.0800742	0.539418	-0.241134	-0.371551	0.153658	0.14801	0.00647023	-0.0414332	0.119639	0.0975885	0.221283	0.34803	-0.468816	0.29915	0.539418
YBR233W	PBP2	RNA binding protein with similarity to mammalian heterogeneous nuclear RNP K protein, involved in the regulation of telomere position effect and telomere length	2		-0.0391377	-0.0444149	0.477697	-0.155316	0.112933	-0.182099	-0.139389	-0.288203	-0.175192	-0.18037	0.0427255	-0.034659	0.367362	0.571875	0.128587	0.477697
YBR233W-A	DAD3	Essential subunit of the Dam1 complex (aka DASH complex), couples kinetochores to the force produced by MT depolymerization thereby aiding in chromosome segregation; is transferred to the kinetochore prior to mitosis	2	DASH complex	0.0534578	0.23608	0.303006	0.0398118	0.0109049	0.176064	-0.0755605	-0.0245229	0.102059	-0.103841	0.224504	-0.350693	0.174084	-0.0975585	0.075982	0.303006
YBR234C	ARC40	Subunit of the ARP2/3 complex, which is required for the motility and integrity of cortical actin patches	2	Arp2/3 protein complex	-0.134114	-0.030623	0.479191	0.307491	-0.512369	-0.175606	0.0215877	0.113267	0.0220809	-0.197122	0.0724783	0.1707	0.393517	0.434719	0.368475	0.479191
YBR235W	YBR235W	Vacuolar membrane cation?chloride cotransporter (CCC); likely mediates K+ and Cl- cotransport into the vacuole; has a role in potassium homeostasis and salt tolerance; similar to mammalian electroneutral Na(+)-(K+)-C1- cotransporter family	2		-0.0444417	-0.129559	1.13558	-0.134399	0.237216	-0.0185618	-0.0268	0.333797	-0.117738	0.143132	0.0441075	-0.159577	0.392097	0.200135	0.004388	1.13558
YBR236C	ABD1	Methyltransferase, catalyzes the transfer of a methyl group from S-adenosylmethionine to the GpppN terminus of capped mRNA	2		0.209777	-0.05295	1.29403	-0.0023135	0.0978098	0.0804836	0.0422876	0.118176	-0.0119602	0.271574	0.142924	-0.108879	0.481691	0.277249	0.146156	1.29403
YBR237W	PRP5	RNA helicase in the DEAD-box family, necessary for prespliceosome formation, bridges U1 and U2 snRNPs and enables stable U2 snRNP association with intron RNA	2		0.0447989	0.20614	0.128097	0.687	-0.079502	-0.227101	-0.145238	-0.289266	-0.00986565	0.291793	0.104225	0.122597	0.654621	0.178096	0.435097	0.128097
YBR238C	YBR238C	Mitochondrial membrane protein with similarity to Rmd9p; not required for respiratory growth but causes a synthetic respiratory defect in combination with rmd9 mutations; transcriptionally up-regulated by TOR; deletion increases life span	2							0.475275	0.761646	0.462659	0.0952589	0.995279
YBR242W	YBR242W	Putative protein of unknown function; green fluorescent protein (GFP)-fusion protein localizes to the cytoplasm and nucleus; YBR242W is not an essential gene	2		-0.0347254	-0.0054859	0.662946	0.0691188	0.0848378	0.0486164	-0.114453	-0.143283	-0.0217695	1.09512	-0.0665865	-0.513824	0.126196	-0.108718	-0.272518	0.662946
YBR244W	GPX2	Phospholipid hydroperoxide glutathione peroxidase; protects cells from phospholipid hydroperoxides and nonphospholipid peroxides during oxidative stress; induced by glucose starvation; protein abundance increases in response to DNA replication stress	2		-0.19098	-0.0863815	0.828089	0.665014	0.824238	0.0190482	-0.243935	0.585838	-0.249257	-0.541744	-0.225886	0.398196	0.657858	-0.921655	-1.24516	0.828089
YBR245C	ISW1	ATPase subunit of imitation-switch (ISWI) class chromatin remodelers; ATPase; forms a complex with Ioc3p (Isw1a), and a complex with Ioc2p and Ioc4p (Isw1b); Isw1a and Isw1b have partially overlapping and distinct roles, Isw1a involved in repression of transcription initiation and Isw1b involved in regulation of transcription elongation; Isw1b recruited to open reading frames by H3K36 methylation…	2	ISW1a complex, ISW1b complex	0.0122556	0.0320884	0.965215	0.0934148	-0.066991	0.0261135	0.0218336	0.00572724	-0.153698	0.146173	0.0784122	-0.003522	0.359777	-0.115874	0.032146	0.965215
YBR246W	RRT2	Protein required for last step of diphthamide biosynthesis; deletion leads to accumulation of diphthine, which is the enzymatic product of the second step of the biosynthesis; WD40 domain-containing protein involved in endosomal recycling; forms a complex with Rtt10p that functions in the retromer-mediated pathway for recycling internalized cell-surface proteins; non-essential gene identified in …	2		0.168211	0.419445	1.67004	0.298988	0.888985	-0.182352	0.74343	0.402687	0.383126	0.675482	-0.12202	-0.007278	0.148816	-0.0159765	-0.193507	1.67004
YBR247C	ENP1	Protein associated with U3 and U14 snoRNAs, required for pre-rRNA processing and 40S ribosomal subunit synthesis; localized in the nucleus and concentrated in the nucleolus	2		-0.127429	-0.0290598	0.893053	-0.1618	0.202703	0.0865193	0.0212768	0.0857343	0.114901	0.0369386	0.0873613	-0.021922	0.332576	-0.276973	0.024949	0.893053
YBR248C	HIS7	Imidazole glycerol phosphate synthase (glutamine amidotransferase:cyclase), catalyzes the fifth step of histidine biosynthesis and also produces 5-aminoimidazole-4-carboxamide ribotide (AICAR), a purine precursor	2		-0.0270179	-0.0480802	0.720253	-0.150841	-0.179073	-0.00331175	-0.0333069	-0.213462	-0.0633057	0.430823	-0.0328105	-0.206875	0.312509	-0.657601	-0.30538	0.720253
YBR249C	ARO4	3-deoxy-D-arabino-heptulosonate-7-phosphate (DAHP) synthase, catalyzes the first step in aromatic amino acid biosynthesis and is feedback-inhibited by tyrosine or high concentrations of phenylalanine or tryptophan	2		0.0086455	-0.223076	0.646792	-0.478774	-0.22554	0.0435681	-0.234016	-0.444099	0.00670215	0.609337	-0.0267635	-0.872637	0.292001	-1.09762	-0.586677	0.646792
YBR251W	MRPS5	Mitochondrial ribosomal protein of the small subunit	2	mitochondrial ribosomal small subunit	-0.0352728	-0.082314	0.405021	-0.210717	-0.0738526	0.0314146	0.0941476	-0.0655846	0.449679	-0.700093	0.0151275	0.458127	-0.107899	0.41127	-0.184614	0.405021
YBR252W	DUT1	deoxyuridine triphosphate diphosphatase (dUTPase); catalyzes hydrolysis of dUTP to dUMP and PPi, thereby preventing incorporation of uracil into DNA during replication; critical for the maintenance of genetic stability; also has diphosphatase activity on deoxyinosine triphosphate	2		-0.001939	-0.102033	0.829219	-0.265831	-0.345475	0.123264	-0.203819	-0.113168	-0.286189	-0.857102	-0.0590105	-0.508407	-0.0529111	-0.9304	-0.532401	0.829219
YBR253W	SRB6	Subunit of the RNA polymerase II mediator complex; associates with core polymerase subunits to form the RNA polymerase II holoenzyme; essential for transcriptional regulation	2	Kornberg's mediator (SRB) complex	-0.044565	0.0630999	0.588762	0.30856	-0.330763	-0.0348697	-0.282501	-0.34135	-0.486124	-0.562952	-0.0442435	-0.166331	-0.250921	-0.0806855	0.015638	0.588762
YBR255C-A	YBR255C-A	Putative protein of unknown function; may interact with respiratory chain complexes III (ubiquinol-cytochrome c reductase) or IV (cytochrome c oxidase); identified by sequence comparison with hemiascomycetous yeast species	2		0.128386	-0.0614648	0.764868	-0.416605	-0.156343	0.021442	-0.332061	-0.240288	0.161114	-0.812112	-0.114084	-0.063322	-0.117903	0.344021	-0.616313	0.764868
YBR255W	MTC4	Protein of unknown function, required for normal growth rate at 15 degrees C; green fluorescent protein (GFP)-fusion protein localizes to the cytoplasm in a punctate pattern; mtc4 is synthetically sick with cdc13-1	2		-0.0963374	-0.104877	0.233818	0.424427	-0.0452801	-0.0126913	0.368101	0.271817	-0.586988	-0.21778	0.0783124	0.230313	0.364285	0.515594	0.234442	0.233818
YBR256C	RIB5	Riboflavin synthase; catalyzes the last step of the riboflavin biosynthesis pathway	2		-0.119644	0.0167939	1.19103	-0.322281	0.00696615	0.00444005	-0.0100864	-0.112477	0.159305	0.424806	-0.0668605	-0.405683	0.618204	-0.583179	-0.271141	1.19103
YBR257W	POP4	Subunit of both RNase MRP and nuclear RNase P; RNase MRP cleaves pre-rRNA, while nuclear RNase P cleaves tRNA precursors to generate mature 5' ends and facilitates turnover of nuclear RNAs; binds to the RPR1 RNA subunit in RNase P	2	nucleolar ribonuclease P complex, ribonuclease MRP complex	-0.0061158	-0.0329711	0.236047	0.107738	0.0891345	0.104596	0.0773871	-0.0274748	-0.00594265	0.0801546	-0.239034	0.029383	0.0517663	-0.135652	-0.12291	0.236047
YBR260C	RGD1	GTPase-activating protein (RhoGAP) for Rho3p and Rho4p, possibly involved in control of actin cytoskeleton organization	2		-0.033354	-0.0156536	1.00385	-0.0407676	0.123727	-0.0327551	0.0325515	-0.0191796	0.0230738	0.0786446	0.130547	-0.076716	0.393065	0.0629585	0.127948	1.00385
YBR261C	TAE1	AdoMet-dependent proline methyltransferase; catalyzes the dimethylation of ribosomal proteins Rpl12 and Rps25 at N-terminal proline residues; has a role in protein synthesis; fusion protein localizes to the cytoplasm	2		-0.0416058	0.0177694	1.001	-0.283375	0.239381	-0.0912326	0.0004924	-0.100507	-0.0655119	0.0089272	0.0035825	-0.061845	0.275186	-0.431546	-0.0680248	1.001
YBR262C	AIM5	Mitochondrial inner membrane protein; subunit of the mitochondrial inner membrane organizing system (MitOS, MICOS, or MINOS), a scaffold-like structure on the intermembrane space side of the inner membrane which has a role in the maintenance of crista junctions and inner membrane architecture	2		0.0717171	0.114744	0.820876	-0.202159	-0.290317	-0.287834	-0.054139	-0.503029	0.0216812	-0.804602	0.0117775	0.37862	-0.200362	0.473683	-0.22104	0.820876
YBR263W	SHM1	Mitochondrial serine hydroxymethyltransferase, converts serine to glycine plus 5,10 methylenetetrahydrofolate; involved in generating precursors for purine, pyrimidine, amino acid, and lipid biosynthesis; reverse reaction generates serine	2		0.0138398	-0.14183	0.772503	-0.401262	-0.0688045	-0.0606331	-0.0439123	-0.265234	-0.0806112	0.0874445	-0.103702	-0.27423	0.123539	-0.163108	-0.195595	0.772503
YBR264C	YPT10	Rab family GTP-binding protein that contains the PEST signal sequence specific for proteolytic enzymes; may be involved in vesicular transport; overexpression leads to accumulation of Golgi-like cisternae with budding vesicles	2		0.109002	0.134931	0.841262	0.112503	0.0493639	-0.0752037	-0.171639	-0.360897	-0.0570526	-0.157054	-0.0462405	0.017777	0.0941961	0.524733	0.03191	0.841262
YBR265W	TSC10	3-ketosphinganine reductase, catalyzes the second step in phytosphingosine synthesis, essential for growth in the absence of exogenous dihydrosphingosine or phytosphingosine, member of short chain dehydrogenase/reductase protein family	2		0.153839	0.0811929	0.830404	0.182108	-0.208358	0.216673	-0.146	-0.0949491	-0.132993	-0.343135	0.0582025	-0.182272	0.184354	-0.78123	-0.25434	0.830404
YBR267W	REI1	Cytoplasmic pre-60S factor; required for the correct recycling of shuttling factors Alb1, Arx1 and Tif6 at the end of the ribosomal large subunit biogenesis; involved in bud growth in the mitotic signaling network	2		-0.0016967	-0.115893	0.665713	-0.313416	-0.0678342	0.0696328	-0.0512256	-0.311054	-0.00851515	-0.179281	-0.165726	-0.110624	-0.119232	-0.798755	-0.248217	0.665713
YBR268W	MRPL37	Mitochondrial ribosomal protein of the large subunit	2	mitochondrial ribosomal large subunit	0.0677373	0.176059	0.398009	-0.383237	-0.446064	0.43227	-0.176607	0.247589	0.246175	-0.183804	-0.0830905	0.303941	-0.305672	-0.155144	-0.291001	0.398009
YBR269C	FMP21	Putative protein of unknown function; the authentic, non-tagged protein is detected in highly purified mitochondria in high-throughput studies	2		-0.0941364	0.249023	0.280081	0.657587	0.274758	-0.0705897	0.302336	0.0571315	0.960098	-0.726189	-0.0022585	0.349493	0.0407365	0.903255	0.32065	0.280081
YBR271W	YBR271W	S-adenosylmethionine-dependent methyltransferase; methylates translation elongation factors EF2 (Eft1p and Eft2p) and EF3A (Yef3p); belongs to the seven beta-strand family; green fluorescent protein (GFP)-fusion protein localizes to the cytoplasm; predicted to be involved in ribosome biogenesis	2		0.142101	-0.0663748	1.40209	0.246939	0.335343	0.0286419	0.372353	0.412133	0.0127427	0.14669	-0.269271	0.134539	0.542742	-0.309979	0.05949	1.40209
YBR272C	HSM3	Proteasome-interacting protein involved in the assembly of the base subcomplex of the 19S proteasomal regulatory particle (RP); involved in DNA mismatch repair during slow growth; weak similarity to Msh1p; related to human 19S subunit S5b; structural study suggests Hsm3p is a scaffold protein for Rpt1p-Rpt2p complex formation	2		0.142969	0.123205	1.02756	0.255753	0.0160783	-0.149286	0.13812	0.222266	0.311738	0.558263	-0.0837595	-0.075431	0.41921	0.525189	0.196357	1.02756
YBR273C	UBX7	UBX (ubiquitin regulatory X) domain-containing protein that interacts with Cdc48p	2		0.161008	0.0052714	1.11053	0.0864718	0.236047	0.065615	0.055205	0.0563027	-0.227194	-0.135196	0.0354035	0.533134	0.503036	0.638756	0.119573	1.11053
YBR274W	CHK1	Serine/threonine kinase and DNA damage checkpoint effector, mediates cell cycle arrest via phosphorylation of Pds1p; phosphorylated by checkpoint signal transducer Mec1p; homolog of S. pombe and mammalian Chk1 checkpoint kinase	2		-0.0020144	-0.12114	0.936252	0.0494898	0.321085	0.0212711	0.0113985	0.087017	0.137654	-0.123894	-0.12119	-0.231214	0.363085	-0.228545	-0.688203	0.936252
YBR275C	RIF1	Protein that binds to the Rap1p C-terminus and acts synergistically with Rif2p to help control telomere length and establish telomeric silencing; deletion results in telomere elongation	2		0.0135781	-0.0581177	0.291759	-0.204302	0.228353	0.0947411	-0.0781086	-0.229588	0.158504	-0.125151	0.101158	-0.236999	0.114749	0.0436475	0.217052	0.291759
YBR276C	PPS1	Protein phosphatase with specificity for serine, threonine, and tyrosine residues; has a role in the DNA synthesis phase of the cell cycle	2		-0.0496124	0.0578129	1.23426	-0.174715	0.161596											1.23426
YBR278W	DPB3	Third-largest subunit of DNA polymerase II (DNA polymerase epsilon); required to maintain fidelity of chromosomal replication and also for inheritance of telomeric silencing; stabilizes the interaction of Pol epsilon with primer-template DNA, positively affecting the processivity of the polymerase and exonuclease activities of Pol epsilon; mRNA abundance peaks at the G1/S boundary of the cell cyc…	2	DNA polymerase epsilon complex	0.126907	-0.209168	0.795261	0.170296	0.0866237						-0.0098345	-0.101795	0.1411	0.163866	0.255275	0.795261
YBR279W	PAF1	Component of the Paf1p complex involved in transcription elongation; binds to and modulates the activity of RNA polymerases I and II; required for expression of a subset of genes, including cell cycle-regulated genes; involved in SER3 repression by helping to maintain SRG1 transcription-dependent nucleosome occupancy; homolog of human PD2/hPAF1	2	Cdc73p/Paf1p complex	0.0353821	0.0155263	0.150294	0.14315	-0.17104	0.055454	-0.077862	-0.0993131	-0.112125	0.107531	-0.0175645	-0.025243	-0.035373	-0.0337355	0.083563	0.150294
YBR280C	SAF1	F-Box protein involved in proteasome-dependent degradation of Aah1p during entry of cells into quiescence; interacts with Skp1	2		-0.0978244	-0.0157554	1.45349	-0.0510476	-0.0100039						0.0157775	0.152488	0.46634	1.08362	0.066217	1.45349
YBR281C	DUG2	Component of glutamine amidotransferase (GATase II); forms a complex with Dug3p to degrade glutathione (GSH) and other peptides containing a gamma-glu-X bond in an alternative pathway to GSH degradation by gamma-glutamyl transpeptidase (Ecm38p)	2	GSH degradosomal complex	0.0443839	-0.0059234	0.971841	-0.0341644	0.288038	-0.0434909	-0.109733	0.243302	-0.226937	0.328236	0.0716221	-0.161617	0.464704	0.0225285	-0.225349	0.971841
YBR282W	MRPL27	Mitochondrial ribosomal protein of the large subunit	2	mitochondrial ribosomal large subunit	0.153477	-0.0673137	0.476401	0.113382	-0.128781	-0.177783	0.0044954	-0.35425	0.35722	-0.774094	0.0077275	0.36235	-0.319274	0.476053	-0.173764	0.476401
YBR283C	SSH1	Subunit of the Ssh1 translocon complex; Sec61p homolog involved in co-translational pathway of protein translocation; not essential	2	Ssh1p translocon complex	0.0727593	-0.0574679	0.736904	0.143341	-0.0305095	-0.138454	-0.050567	-0.254265	-0.545952	-0.444907	0.130238	0.197259	0.293895	-0.185341	0.251852	0.736904
YBR286W	APE3	Vacuolar aminopeptidase Y, processed to mature form by Prb1p	2		0.063584	-0.216212	0.943571	-0.493639	-0.0143938	-0.0118441	-0.120085	0.0533462	-0.0897601	-0.147214	-0.0113355	0.108927	0.274554	-0.354349	-0.589232	0.943571
YBR288C	APM3	Mu3-like subunit of the clathrin associated protein complex (AP-3); functions in transport of alkaline phosphatase to the vacuole via the alternate pathway	2	AP-3 adaptor complex	-0.0893894	0.0763569	0.975191	0.700545	0.306052	0.103093	0.20784	0.371651	0.0528717	-0.0639132	-0.15488	-0.157543	0.263186	0.0627205	0.049807	0.975191
YBR289W	SNF5	Subunit of the SWI/SNF chromatin remodeling complex; involved in transcriptional regulation; functions interdependently in transcriptional activation with Snf2p and Snf6p; relocates to the cytosol under hypoxic conditions	2	SWI/SNF complex	0.102002	-0.05094	1.22033	0.0305769	0.088481	-0.111136	-0.0102817	0.202492	-0.151378	-0.300712	0.0499475	0.152011	0.216284	0.234018	0.243825	1.22033
YBR291C	CTP1	Mitochondrial inner membrane citrate transporter, member of the mitochondrial carrier family	2		-0.138959	2.0408	0.325617	1.42887	1.67047						-0.397531	1.18485	1.5448	1.5943	1.48994	0.325617
YBR292C	YBR292C	Dubious open reading frame unlikely to encode a protein, based on available experimental and comparative sequence data; YBR292C is not an essential gene	2		-0.0584377	0.00771525	-0.138076	-0.132219	0.0519482											-0.138076
YBR299W	MAL32	Maltase (alpha-D-glucosidase), inducible protein involved in maltose catabolism; encoded in the MAL3 complex locus; functional in genomic reference strain S288C; hydrolyzes the disaccharides maltose, turanose, maltotriose, and sucrose	2							0.0361794	0.342152	0.445436	0.384402	1.41617	-0.250705	0.0508175	0.731546	1.53728	0.344827
YCL009C	ILV6	Regulatory subunit of acetolactate synthase, which catalyzes the first step of branched-chain amino acid biosynthesis; enhances activity of the Ilv2p catalytic subunit, localizes to mitochondria	3	acetolactate synthase complex	0.0418627	-0.200479	-0.341445	-0.366514	-0.248285	0.0394957	-0.151231	-0.627911	-0.0318934	0.248891	0.113842	-0.401668	0.230739	-0.456654	-0.2507
YCL010C	SGF29	Component of the HAT/Core module of the SAGA, SLIK, and ADA complexes; HAT/Core module also contains Gcn5p, Ngg1p, and Ada2p; binds methylated histone H3K4; involved in transcriptional regulation through SAGA and TBP recruitment to target promoters and H3 acetylation	3	SAGA complex	0.105851	0.163484	-0.201714	0.115279	-0.241337	-0.129134	-0.114835	-0.337718	-0.198106	-0.261685	0.0322915	-0.429895	-0.308137	-0.38985	-0.09607
YCL011C	GBP2	Poly(A+) RNA-binding protein, involved in the export of mRNAs from the nucleus to the cytoplasm; similar to Hrb1p and Npl3p; also binds single-stranded telomeric repeat sequence in vitro	3		-0.0727084	0.0004226	-0.0824861	0.0444188	-0.168169	-0.105159	-0.216156	-0.0547427	-0.324132	-0.254012	0.0291285	-0.043587	0.202624	-0.263991	-0.001358
YCL014W	BUD3	Protein involved in bud-site selection and required for axial budding pattern; localizes with septins to bud neck in mitosis and may constitute an axial landmark for next round of budding	3		0.0614146	0.0539299	0.118606	-0.0558834	0.249348	0.0449183	-0.221651	0.23141	0.050124	0.163327	-0.0064565	-0.233794	0.0066944	0.130913	-0.130295
YCL017C	NFS1	Cysteine desulfurase involved in iron-sulfur cluster (Fe/S) biogenesis and in thio-modification of mitochondrial and cytoplasmic tRNAs; essential protein located predominantly in mitochondria	3	Nfs1p/Isd11p complex	0.0831872	0.0722649	-0.0299765	0.11458	-0.053219	0.0163651	-0.0571878	-0.0995201	0.180222	-0.255009	0.0188945	0.047572	0.0311087	0.323394	0.071138
YCL024W	KCC4	Protein kinase of the bud neck involved in the septin checkpoint; associates with septin proteins, negatively regulates Swe1p by phosphorylation, shows structural homology to bud neck kinases Gin4p and Hsl1p; KCC4 has a paralog, GIN4, that arose from the whole genome duplication	3		0.12001	-0.326507	0.00422335	-0.183675	0.136784	0.0784221	0.267079	0.117318	0.238	0.160057	0.0714502	-0.187053	0.275028	0.513189	-0.112352
YCL025C	AGP1	Low-affinity amino acid permease with broad substrate range; involved in uptake of asparagine, glutamine, and other amino acids; expression regulated by SPS plasma membrane amino acid sensor system (Ssy1p-Ptr3p-Ssy5p); AGP1 has a paralog, GNP1, that arose from the whole genome duplication	3		0.0398254	-0.203414	-0.876705	0.573113	0.0543542						0.138458	-1.23085	-0.109933	-2.0807	-1.33707
YCL026C-B	HBN1	Putative protein of unknown function; similar to bacterial nitroreductases; green fluorescent protein (GFP)-fusion protein localizes to the cytoplasm and nucleus; protein becomes insoluble upon intracellular iron depletion; protein abundance increases in response to DNA replication stress	3		-0.0891934	0.285355	0.23882	-0.59273	0.619494	-0.119379	0.638737	0.240879	0.598301	0.469415	-0.158627	0.14	0.231769	0.163171	0.049766
YCL028W	RNQ1	[PIN(+)] prion, an infectious protein conformation that is generally an ordered protein aggregate	3		0.0811655	-0.174308	0.372077	0.0803818	-0.00024391	0.0202078	0.0462841	0.132488	-0.0580974	-0.0990993	0.261225	0.033855	0.443806	0.0125165	0.095427
YCL029C	BIK1	Microtubule-associated protein, component of the interface between microtubules and kinetochore, involved in sister chromatid separation; essential in polyploid cells but not in haploid or diploid cells; ortholog of mammalian CLIP-170	3		-0.0516003	-0.176132	-0.222785	0.126343	-0.435138	0.0101786	-0.0259742	-0.281917	-0.0659774	0.0542661	-0.0333125	-0.083366	0.0782248	-0.388248	-0.216194
YCL030C	HIS4	Multifunctional enzyme containing phosphoribosyl-ATP pyrophosphatase, phosphoribosyl-AMP cyclohydrolase, and histidinol dehydrogenase activities; catalyzes the second, third, ninth and tenth steps in histidine biosynthesis	3		-0.0313352	-0.257305	-0.803919	-0.298228	-0.255968	0.0545338	-0.741856	-1.12379	0.217796	0.657763	0.0100235	-1.67506	0.871746	-2.29157	-1.04775
YCL031C	RRP7	Essential protein involved in rRNA processing and ribosome biogenesis; protein abundance increases in response to DNA replication stress	3	UTP C complex, CURI complex	-0.0190058	0.0252472	0.0257363	-0.0736797	-0.112753	-0.0124729	-0.134947	-0.0464071	-0.0237284	-0.161016	0.0201695	-0.077407	0.0776272	-0.116729	0.068043
YCL032W	STE50	Protein involved in mating response, invasive/filamentous growth, and osmotolerance, acts as an adaptor that links G protein-associated Cdc42p-Ste20p complex to the effector Ste11p to modulate signal transduction	3		0.0064386	-0.0168676	0.0574937	0.234665	-0.171739	0.325634	-0.0304391	0.25325	0.0889499	0.393124	-0.0281875	0.00515	0.289463	0.469269	0.148175
YCL033C	MXR2	Methionine-R-sulfoxide reductase, involved in the response to oxidative stress; protects iron-sulfur clusters from oxidative inactivation along with MXR1; involved in the regulation of lifespan	3							-0.0473412	0.105271	0.363961	0.504875	0.469291	-0.0064365	0.293619	0.267654	0.425247	0.067271
YCL034W	LSB5	Protein of unknown function; binds Las17p, which is a homolog of human Wiskott-Aldrich Syndrome protein involved in actin patch assembly and actin polymerization; may mediate disassembly of the Pan1 complex from the endocytic coat	3		0.0228647	0.202395	-0.0344525	1.23004	-0.161267	0.0967923	0.419445	0.690242	-0.52331	-0.0633241	0.188953	0.289498	0.303838	0.641375	0.490762
YCL035C	GRX1	Glutathione-dependent disulfide oxidoreductase; hydroperoxide and superoxide-radical responsive, heat-stable, with active site cysteine pair; protects cells from oxidative damage; GRX1 has a paralog, GRX2, that arose from the whole genome duplication; protein abundance increases in response to DNA replication stress	3		0.120363	0.816608	1.14804	-0.549766	0.757017	-0.0187208	0.674436	0.43915	0.658285	0.91686	-0.106853	0.176725	0.664794	1.40421	0.439
YCL036W	GFD2	Protein of unknown function; identified as a high-copy suppressor of a dbp5 mutation; GFD2 has a paralog, YDR514C, that arose from the whole genome duplication	3		0.0456807	0.0420275	-0.0979329	-0.315127	0.192003	-0.0200598	0.0966586	-0.00305736	0.00769055	-0.0930173	0.154909	0.232121	-0.17256	-0.731604	-0.520861
YCL037C	SRO9	Cytoplasmic RNA-binding protein; associates with translating ribosomes; involved in heme regulation of Hap1p as a component of the HMC complex, also involved in the organization of actin filaments; contains a La motif; SRO9 has a paralog, SLF1, that arose from the whole genome duplication	3	HMC Complex	-0.0213288	0.0497159	-0.0692441	-0.0989648	-0.290072	-0.0866186	-0.307763	0.00856457	-0.358336	-0.233532	-0.0448035	-0.351157	-0.0064114	-0.368175	-0.138435
YCL039W	GID7	Subunit of GID Complex that binds directly to central component Vid30p; GID complex is involved in proteasome-dependent catabolite inactivation of fructose-1,6-bisphosphatase; Gid7p contains six WD40 repeats; computational analysis suggests that Gid7p and Moh1p have similar functions	3	FBP degradation complex	0.136608	0.0820529	0.271572	0.0098905	0.307011	0.0803987	-0.0170611	0.430354	0.0852949	0.152783	-0.0902755	0.124625	0.289237	0.668895	-0.226611
YCL040W	GLK1	Glucokinase; catalyzes the phosphorylation of glucose at C6 in the first irreversible step of glucose metabolism; one of three glucose phosphorylating enzymes; expression regulated by non-fermentable carbon sources; GLK1 has a paralog, EMI2, that arose from the whole genome duplication	3		-0.0242273	0.256477	0.086842	-0.0797647	0.0519206	-0.0738226	0.173609	-0.1107	-0.368757	-0.86191	-0.0874765	0.359737	-0.145739	0.770836	-0.0660894
YCL043C	PDI1	Protein disulfide isomerase; multifunctional protein of ER lumen, essential for formation of disulfide bonds in secretory and cell-surface proteins, unscrambles non-native disulfide bonds; key regulator of Ero1p; forms complex with Mnl1p that has exomannosidase activity, processing unfolded protein-bound Man8GlcNAc2 oligosaccharides to Man7GlcNAc2, promoting degradation in unfolded protein respon…	3		-0.0230526	-0.0622614	-0.0160175	-0.303422	0.00336745	-0.0722466	-0.0142314	0.0128268	0.145443	0.197229	-0.100413	-0.009955	0.052907	-0.514392	-0.0716991
YCL044C	MGR1	Subunit of the mitochondrial (mt) i-AAA protease supercomplex, which degrades misfolded mitochondrial proteins; forms a subcomplex with Mgr3p that binds to substrates to facilitate proteolysis; required for growth of cells lacking mtDNA	3	i-AAA complex	0.0106017	-0.0740204	0.224974	-0.0345191	-0.0601935	0.0527357	-0.0843785	0.129985	-0.0208368	-0.14941	0.079813	0.476308	-0.0110774	-0.0507995	-0.0900121
YCL045C	EMC1	Member of a transmembrane complex required for efficient folding of proteins in the ER; null mutant displays induction of the unfolded protein response; interacts with Gal80p	3		-0.0551045	-0.13686	-0.0571408	-0.0971102	-0.0341598	0.0367298	0.0235273	0.171022	-0.00615025	-0.149451	0.0187165	-0.023189	0.492342	-0.142433	-0.0820355
YCL047C	YCL047C	ATPase involved in the protein quality control and filamentation pathways; interacts physically with Kss1p and suppresses the filamentation defect of a kss1 deletion; also interacts with Ubc7p	3		-0.0332264	-0.092779	-0.117852	-0.0741617	-0.0790003	0.0295115	-0.007257	0.0320791	0.164431	-0.0716017	0.0531685	-0.12869	-0.0457292	-0.547791	0.273301
YCL050C	APA1	AP4A phosphorylase; bifunctional diadenosine 5',5'''-P1,P4-tetraphosphate phosphorylase and ADP sulfurylase involved in catabolism of bis(5'-nucleosidyl) tetraphosphates; catalyzes phosphorolysis of dinucleoside oligophosphates, cleaving the substrates' alpha/beta-anhydride bond and introducing Pi into the beta-position of the corresponding NDP formed; APA1 and APA2 are paralogs arising from whol…	3		-0.0262928	0.535491	0.239827	-0.0429087	0.569293	0.0558181	0.363128	-0.0537891	0.0771169	0.922641	-0.0130765	0.159829	0.623797	0.298046	0.129885
YCL052C	PBN1	Essential component of glycosylphosphatidylinositol-mannosyltransferase I, required for the autocatalytic post-translational processing of the protease B precursor Prb1p, localizes to ER in lumenal orientation; homolog of mammalian PIG-X	3		0.0437397	-0.0665161	0.392755	-0.0791237	0.177655	-0.0813996	0.123462	-0.0780088	0.0710682	0.0530168	0.0273985	-0.043223	0.352459	0.324325	0.242979
YCL054W	SPB1	AdoMet-dependent methyltransferase involved in rRNA processing and 60S ribosomal subunit maturation; methylates G2922 in the tRNA docking site of the large subunit rRNA and in the absence of snR52, U2921; suppressor of PAB1 mutants	3		0.0017982	-0.0669025	0.108242	-0.218479	0.148182	-0.0189925	-0.110276	-0.0913863	-0.00173985	0.164966	0.0178025	0.006383	0.27583	-0.444492	0.04401
YCL057W	PRD1	Zinc metalloendopeptidase; found in the cytoplasm and intermembrane space of mitochondria; with Cym1p, involved in degradation of mitochondrial proteins and of presequence peptides cleaved from imported proteins; protein abundance increases in response to DNA replication stress	3		-0.0082873	0.153608	0.407963	-0.0769685	0.39171	-0.0177312	0.344222	0.455193	0.118683	0.0467226	-0.0026835	0.540579	0.644239	0.271909	-0.172323
YCL058W-A	YCL058W-A	Transcriptional repressor encoded by the antisense strand of the FYV5 gene; negatively regulates transcription of FYV5 by binding to the promoter on the sense strand	3		0.0644524	0.0947949	-0.154198	-0.179961	0.115303	0.0547441	0.0236658	-0.151376	0.168012	0.139765	0.181519	-0.283118	-0.131435	-0.587997	0.033673
YCL059C	KRR1	Essential nucleolar protein required for the synthesis of 18S rRNA and for the assembly of 40S ribosomal subunit	3		0.0190415	0.0016056	-0.0722746	0.0607608	0.242933	0.04304	0.0273947	0.135824	-0.0976841	0.223828	-0.0775495	0.177377	0.239466	-0.279274	0.105635
YCL061C	MRC1	S-phase checkpoint protein required for DNA replication; interacts with and stabilizes Pol2p at stalled replication forks during stress, where it forms a pausing complex with Tof1p and is phosphorylated by Mec1p; protects uncapped telomeres	3	Tof1p/Mrc1p/Csm3p complex	-0.02155	-0.0628083	-0.269864	-0.0399258	-0.0724575	-0.0277201	-0.147474	-0.117497	0.0472667	-0.227509	-0.0580465	-0.226714	-0.0107204	-0.0086045	-0.176343
YCL064C	CHA1	Catabolic L-serine (L-threonine) deaminase, catalyzes the degradation of both L-serine and L-threonine; required to use serine or threonine as the sole nitrogen source, transcriptionally induced by serine and threonine	3		-0.0051466	0.225074	0.173406	-0.25294	-0.241242	-0.00877735	-0.450079	0.514962	-0.921711	0.406269	-0.0262495	-0.298615	-0.275072	0.0415145	0.612533
YCR002C	CDC10	Component of the septin ring, required for cytokinesis; septins are GTP-binding proteins that assemble into rod-like hetero-oligomers that can associate to form filaments; septin rings at the mother-bud neck act as scaffolds for recruiting cell division factors and as barriers to prevent diffusion of specific proteins between mother and daughter cells; N-terminus interacts with phosphatidylinosit…	3		0.0378858	-0.0038143	-0.0430418	0.279618	-0.00884142	0.154244	-0.024507	0.291603	-0.152982	0.197108	0.15819	-0.160888	-0.0305048	0.181332	0.15391
YCR003W	MRPL32	Mitochondrial ribosomal protein of the large subunit; protein abundance increases in response to DNA replication stress	3	mitochondrial ribosomal large subunit	0.12073	0.100455	0.360208	0.627669	0.00064544	-0.00594765	0.13188	-0.236396	0.531322	-0.536805	-0.272262	0.641145	-0.40626	0.723305	0.032465
YCR004C	YCP4	Protein of unknown function, has sequence and structural similarity to flavodoxins; predicted to be palmitoylated; the authentic, non-tagged protein is detected in highly purified mitochondria in high-throughput studies	3		0.0887632	-0.106247	0.0406424	-0.18288	0.137645	-0.0656366	-0.184827	-0.00236843	0.293316	-0.0104549	0.0363655	0.0611	0.176205	0.416645	-0.0661299
YCR005C	CIT2	Citrate synthase, catalyzes the condensation of acetyl coenzyme A and oxaloacetate to form citrate, peroxisomal isozyme involved in glyoxylate cycle; expression is controlled by Rtg1p and Rtg2p transcription factors	3		0.067019	-0.223421	0.986568	-0.0570016	0.173196	-0.00894425	0.559473	0.797188	0.107357	-0.488155	0.0214825	-0.346958	-0.123099	0.426363	0.159287
YCR008W	SAT4	Ser/Thr protein kinase involved in salt tolerance; funtions in regulation of Trk1p-Trk2p potassium transporter; partially redundant with Hal5p; has similarity to Npr1p	3		0.0113156	-0.0489655	0.00113415	-0.199776	0.0543689	0.0339096	0.194542	-0.255715	0.013311	-0.262349	0.223164	0.456699	-0.0026986	-0.20484	0.325082
YCR009C	RVS161	Amphiphysin-like lipid raft protein; interacts with Rvs167p and regulates polarization of the actin cytoskeleton, endocytosis, cell polarity, cell fusion and viability following starvation or osmotic stress	3	Rvs161p/Rvs167p complex	0.0652426	0.0072534	0.0927966	0.119563	-0.00459815	0.0151731	0.0172723	0.0369663	-0.118837	-0.105732	-0.0728855	-0.033957	-0.0599831	0.251079	0.124965
YCR011C	ADP1	Putative ATP-dependent permease of the ABC transporter family of proteins	3		0.141117	0.178011	-0.237602	0.252657	0.108957	0.0514954	-0.162976	0.0583644	-0.205707	-0.604276	-0.0170795	0.368332	-0.232493	-0.304865	0.135002
YCR012W	PGK1	3-phosphoglycerate kinase, catalyzes transfer of high-energy phosphoryl groups from the acyl phosphate of 1,3-bisphosphoglycerate to ADP to produce ATP; key enzyme in glycolysis and gluconeogenesis	3		0.0010624	-0.0602425	-0.159884	-0.200176	-0.083955	-0.0412444	0.174838	-0.101475	-0.240229	-0.205393	-0.0419305	-0.117016	-0.0838301	-0.985165	-0.522074
YCR015C	YCR015C	Putative protein of unknown function; YCR015C is not an essential gene	3		-0.222702	-0.101845	-0.242438	0.0634488	-0.131649	0.0427109	0.0410889	-0.0735874	0.0358311	0.299668	-0.135016	-0.070747	-0.293648	-0.176384	-0.20533
YCR016W	YCR016W	Putative protein of unknown function; green fluorescent protein (GFP)-fusion protein localizes to the nucleolus and nucleus; predicted to be involved in ribosome biogenesis	3		0.0501687	0.152193	-0.0551341	-0.0427872	0.255226	-0.0394263	-0.0889457	-0.0625513	-0.0672076	0.138563	0.0427925	0.22459	0.121743	-0.277703	0.229856
YCR017C	CWH43	Putative sensor/transporter protein involved in cell wall biogenesis; contains 14-16 transmembrane segments and several putative glycosylation and phosphorylation sites; null mutation is synthetically lethal with pkc1 deletion	3		0.0252289	-0.0553735	0.0502396	0.0761828	0.0834375	-0.125957	0.0215086	-0.0789132	0.110831	-0.0378901	0.0654385	0.10705	0.235902	0.285468	0.084878
YCR019W	MAK32	Protein necessary for structural stability of L-A double-stranded RNA-containing particles	3							0.227469	-0.142279	0.128078	-0.450457	-0.1419
YCR024C	SLM5	Mitochondrial asparaginyl-tRNA synthetase	3							-0.00035475	0.19157	0.0220851	0.652574	0.224546	0.0263395	0.057097	0.130205	0.697045	-0.00528
YCR026C	NPP1	Nucleotide pyrophosphatase/phosphodiesterase family member; mediates extracellular nucleotide phosphate hydrolysis along with Npp2p and Pho5p; activity and expression enhanced during conditions of phosphate starvation	3							0.0157486	-0.101471	-0.160553	-0.179853	-0.0911053	-0.215834	0.00506	0.0564039	-0.0367645	0.020313
YCR027C	RHB1	Putative Rheb-related GTPase involved in regulating canavanine resistance and arginine uptake; member of the Ras superfamily of G-proteins	3		0.233465	0.0515809	0.0301499	-0.138133	0.0630321	-0.253996	-0.0393938	-0.406585	-0.332612	-0.110113	-0.0520915	0.160129	-0.257798	0.115555	0.251159
YCR028C-A	RIM1	Single-stranded DNA-binding protein essential for mitochondrial genome maintenance; involved in mitochondrial DNA replication	3		-0.0154512	-0.224447	-0.233625	-0.274106	-0.348754	0.0408065	-0.0161216	-0.274901	0.13808	-0.118324	-0.178752	-0.293236	-0.312015	-0.298961	-0.121349
YCR030C	SYP1	Protein of unknown function that is involved in endocytic site formation; may regulate assembly and disassembly of the septin ring; colocalizes and interacts with septin subunits; potential role in actin cytoskeletal organization	3		-0.009312	0.0846969	0.056267	0.0737688	-0.104968	-0.00073255	0.0646598	-0.0645636	0.0511283	0.0294923	0.0792558	0.28451	0.295977	0.328948	0.147813
YCR031C	RPS14A	Protein component of the small (40S) ribosomal subunit; required for ribosome assembly and 20S pre-rRNA processing; mutations confer cryptopleurine resistance; homologous to mammalian ribosomal protein S14 and bacterial S11; RPS14A has a paralog, RPS14B, that arose from the whole genome duplication	3	cytoplasmic ribosomal small subunit	-0.0009197	-0.183712	-0.27645	-0.326411	-0.251108	0.0184153	-0.0785867	-0.134142	-0.10803	-0.237641	-0.128477	-0.313777	-0.225159	-0.793022	-0.35048
YCR032W	BPH1	PProtein homologous to human Chediak-Higashi syndrome and murine Beige proteins, which are implicated in disease syndromes due to defective lysosomal trafficking; mutant phenotype and genetic interactions suggest a role in protein sorting	3												0.315303	0.344078	0.40501	0.946565	0.401
YCR033W	SNT1	Subunit of the Set3C deacetylase complex that interacts directly with the Set3C subunit, Sif2p; putative DNA-binding protein; mutant has increased aneuploidy tolerance	3	Set3p complex	0.039768	0.0632189	0.131988	0.0617068	-0.286641	-0.113283	-0.235325	0.132233	-0.147322	-0.133343	-0.0716755	0.10951	-0.0095362	0.0704045	0.183489
YCR035C	RRP43	Exosome non-catalytic core component; involved in 3'-5' RNA processing and degradation in both the nucleus and the cytoplasm; has similarity to E. coli RNase PH and to human hRrp43p (OIP2, EXOSC8); protein abundance increases in response to DNA replication stress	3	Nuclear exosome complex, Cytoplasmic exosome complex	0.0670381	0.0684119	0.0442842	0.0858908	-0.0562745	-0.0875146	-0.0998387	-0.238847	-0.19357	0.124114	0.0976454	-0.078736	0.0270894	-0.395859	0.190014
YCR036W	RBK1	Putative ribokinase	3		0.0195378	0.283577	0.421203	0.237312	0.171261	0.00980105	0.205827	0.426981	0.310348	0.354208	-0.0712075	-0.150769	0.148959	0.489006	-0.028838
YCR037C	PHO87	Low-affinity inorganic phosphate (Pi) transporter, involved in activation of PHO pathway; expression is independent of Pi concentration and Pho4p activity; contains 12 membrane-spanning segments	3		-0.103866	-0.188444	0.42098	0.619385	-0.445958	0.107335	0.432522	1.62185	-0.288535	0.694404	0.0488525	2.04367	1.129	1.42384	1.94981
YCR042C	TAF2	TFIID subunit (150 kDa), involved in RNA polymerase II transcription initiation	3	transcription factor TFIID complex	-0.0011382	0.161023	-0.0258367	0.197698	0.147988	0.024123	-0.0893317	-0.0495343	0.0442393	0.135705	0.0025315	-0.210309	0.0517016	0.163191	-0.024331
YCR043C	YCR043C	Putative protein of unknown function; green fluorescent protein (GFP)-fusion protein localizes to the Golgi apparatus; YCR043C is not an essential gene	3							0.258765	0.18114	0.447107	0.12227	0.48753	0.141034	-0.443716	-0.0741371	0.0964805	0.21235
YCR046C	IMG1	Mitochondrial ribosomal protein of the large subunit, required for respiration and for maintenance of the mitochondrial genome	3	mitochondrial ribosomal large subunit	-0.0107505	0.186893	0.337441	0.0927628	-0.274284	0.332284	0.144426	-0.0733649	0.281211	-0.846364	0.0438235	0.546195	-0.180251	0.486517	-0.002136
YCR047C	BUD23	Methyltransferase, methylates residue G1575 of 18S rRNA; required for rRNA processing and nuclear export of 40S ribosomal subunits independently of methylation activity; diploid mutant displays random budding pattern	3		0.0519494	-0.0492132	-0.0282179	0.19968	0.0159082	-0.0180679	-0.0395469	-0.0456614	0.0466237	-0.25815	0.20974	0.091348	0.490113	-0.816326	0.005068
YCR048W	ARE1	Acyl-CoA:sterol acyltransferase, isozyme of Are2p; endoplasmic reticulum enzyme that contributes the major sterol esterification activity in the absence of oxygen	3		-0.04378	-0.170219	0.15764	0.132221	-0.0260797	0.0480179	0.0021629	0.267793	0.462013	0.236087	-0.0494595	-0.107093	0.117755	-0.482065	-0.169891
YCR051W	YCR051W	Putative protein of unknown function; green fluorescent protein (GFP)-fusion protein localizes to the cytoplasm and nucleus; contains ankyrin (Ank) repeats; YCR051W is not an essential gene	3		0.0340854	0.494444	1.09747	-0.0021799	1.20166	-0.0644396	0.683543	0.0446394	0.590636	0.664981	0.0192935	0.569712	0.969814	0.546469	1.08064
YCR052W	RSC6	Component of the RSC chromatin remodeling complex; essential for mitotic growth; homolog of SWI/SNF subunit Swp73p	3	RSC complex	-0.0303596	0.119147	0.0798456	0.298641	-0.134127	0.0169551	-0.0489698	-0.0518262	-0.11108	-0.022635	0.0840864	-0.144665	-0.0074861	-0.338619	0.105562
YCR053W	THR4	Threonine synthase, conserved protein that catalyzes formation of threonine from O-phosphohomoserine; expression is regulated by the GCN4-mediated general amino acid control pathway	3		-0.0377436	0.548898	0.530314	0.0386758	0.778235	-0.0359945	0.689404	0.0582234	0.571203	0.478893	-0.0060645	0.728308	0.341817	0.0150595	-0.180619
YCR054C	CTR86	Essential protein of unknown function; with orthologs in Ashbya gossypii and Candida albicans; similar to human ATXN10, mutations in which cause spinocerebellar ataxia type 10; codon usage corresponds to that observed for yeast genes expressed at low levels	3		-0.0347587	0.165064	0.159758	0.249052	0.241567	0.00488655	-0.0180958	0.0708337	-0.0568769	-0.199726	0.342822	0.291707	0.27479	0.335258	0.636512
YCR057C	PWP2	Conserved 90S pre-ribosomal component essential for proper endonucleolytic cleavage of the 35 S rRNA precursor at A0, A1, and A2 sites; contains eight WD-repeats; PWP2 deletion leads to defects in cell cycle and bud morphogenesis	3	UTP B complex	-0.0762004	0.0442958	-0.104437	0.174846	0.00021518	0.0429428	0.0014368	0.083843	-0.160814	0.0692053	-0.0589075	0.076691	-0.0126821	-0.210252	-0.0537176
YCR059C	YIH1	Negative regulator of eIF2 kinase Gcn2p; competes with Gcn2p for binding to Gcn1p; may contribute to regulation of translation in response to starvation via regulation of Gcn2p; binds to monomeric actin and to ribosomes and polyribosomes; ortholog of mammalian IMPACT	3							0.111385	0.98507	0.363446	0.876916	1.17786	-0.519853	0.31171	0.780304	1.53087	0.50984
YCR060W	TAH1	Component of the conserved R2TP complex (Rvb1-Rvb2-Tah1-Pih1); contains a single TPR domain with at least two TPR motifs; R2TP complex interacts with Hsp90 (Hsp82p and Hsc82p) to mediate assembly large protein complexes such as box C/D snoRNPs and RNA polymerase II	3		-0.0239227	-0.233705	-0.136415	-0.0154156	0.769417	-0.161754	0.098253	0.971966	0.490421	0.507785	0.102838	-0.011318	-0.395404	-0.501386	-0.132881
YCR063W	BUD31	Component of the SF3b subcomplex of the U2 snRNP; diploid mutants display a random budding pattern instead of the wild-type bipolar pattern; facilitates passage through G1/S Start, but is not required for G2/M transition or exit from mitosis	3		-0.110791	-0.0974217	0.0123463	-0.0179256	-0.100733	-0.00694285	0.31423	0.208608	-0.164066	-0.0380612	0.12369	0.109533	0.317063	-0.0235485	0.471349
YCR066W	RAD18	E3 ubiquitin ligase; forms heterodimer with Rad6p to monoubiquitinate PCNA-K164; heterodimer binds single-stranded DNA and has single-stranded DNA dependent ATPase activity; required for postreplication repair; SUMO-targeted ubiquitin ligase (STUbl) that contains a SUMO-interacting motif (SIM) which stimulates its ubiquitin ligase activity towards the sumoylated form of PCNA	3	Rad6p/Rad18p complex						-0.1504	-0.213351	-0.0383196	-0.100363	0.537283	-0.0194065	0.057408	0.1949	-0.0728635	-0.186339
YCR067C	SED4	Integral endoplasmic reticulum membrane protein that stimulates Sar1p GTPase activity; involved in COPII vesicle budding through disassociation of coat proteins from membranes onto liposomes; binds Sec16p; similar to Sec12p	3		-0.0036916	0.205971	0.328583	0.515263	0.373003	-0.0535313	0.064604	0.367863	0.0895834	0.0626111	0.112707	-0.18989	0.478219	0.0730565	0.211803
YCR068W	ATG15	Lipase required for intravacuolar lysis of autophagic bodies and Cvt bodies; targeted to intravacuolar vesicles during autophagy via the multivesicular body (MVB) pathway	3		0.0134904	0.209539	0.390864	0.173465	0.0109476	0.407807	0.282936	0.23943	-0.354343	-0.0798883	0.0293085	0.111475	0.357587	0.567184	0.583951
YCR069W	CPR4	Peptidyl-prolyl cis-trans isomerase (cyclophilin), catalyzes the cis-trans isomerization of peptide bonds N-terminal to proline residues; has a potential role in the secretory pathway	3		-0.0475761	0.039178	0.0583129	0.0783228	-0.37251	-0.0379864	0.145656	0.315341	-0.391958	-1.10898
YCR071C	IMG2	Mitochondrial ribosomal protein of the large subunit	3	mitochondrial ribosomal large subunit	-0.0412331	-0.0768489	0.0428255	-0.320643	-0.336999	0.00961775	0.0900853	-0.297769	0.473353	-0.599277	0.307366	0.445821	-0.125691	0.286562	-0.221313
YCR072C	RSA4	WD-repeat protein involved in ribosome biogenesis; may interact with ribosomes; required for maturation and efficient intra-nuclear transport or pre-60S ribosomal subunits, localizes to the nucleolus	3		-0.0438382	-0.0119918	0.143222	0.11247	0.21281	-0.0845146	0.0236402	-0.0565654	0.00564885	0.246144	0.0813034	0.03503	0.0475675	-0.525668	0.027315
YCR073W-A	SOL2	Protein with a possible role in tRNA export; shows similarity to 6-phosphogluconolactonase non-catalytic domains but does not exhibit this enzymatic activity; homologous to Sol3p and Sol4p; SOL2 has a paralog, SOL1, that arose from the whole genome duplication	3		0.0821482	0.0703019	0.216144	0.510994	0.129952	-0.301749	0.0238553	-0.249083	-0.0368882	-0.214276	-0.0630845	0.280035	-0.0925571	0.212258	-0.027177
YCR075W-A	YCR075W-A	Putative protein of unknown function; identified by homology to Ashbya gossypii	3		0.41765	0.415088	0.877334	0.0928458	0.136614						-0.0319175	-0.05027	-0.0876591	-0.0766475	0.076378
YCR076C	YCR076C	Putative protein of unknown function; interacts physically with multiple subunits of the 20S proteasome and genetically with genes encoding 20S core particle and 19S regulatory particle subunits; exhibits boundary activity which blocks the propagation of heterochromatic silencing; contains a PI31 proteasome regulator domain and sequence similarity with human PSMF1, a proteasome inhibitor; not an …	3		0.034633	0.31464	0.0691709	0.214156	0.383738						0.0203985	0.207106	0.303129	0.584682	0.472187
YCR077C	PAT1	Topoisomerase II-associated deadenylation-dependent mRNA-decapping factor; also required for faithful chromosome transmission, maintenance of rDNA locus stability, and protection of mRNA 3'-UTRs from trimming; functionally linked to Pab1p	3		-0.0185941	-0.0296528	-0.0869416	0.0992068	-0.230595	0.100983	0.122549	-0.0195191	-0.240848	0.133296	-0.0512875	0.046572	0.0424026	-0.0807825	0.038473
YCR079W	PTC6	Mitochondrial type 2C protein phosphatase (PP2C) with similarity to mammalian PP1Ks; involved in mitophagy; null mutant is sensitive to rapamycin and has decreased phosphorylation of the Pda1 subunit of pyruvate dehydrogenase	3												0.236615	-0.316054	-0.151587	0.532712	-0.016851
YCR081W	SRB8	Subunit of the RNA polymerase II mediator complex; associates with core polymerase subunits to form the RNA polymerase II holoenzyme; essential for transcriptional regulation; involved in glucose repression	3	Kornberg's mediator (SRB) complex	-0.0772964	-0.0839007	0.202263	-0.0978306	-0.0190189	-0.261416	0.0638371	0.0404505	0.341389	-0.0027084
YCR083W	TRX3	Mitochondrial thioredoxin, highly conserved oxidoreductase required to maintain the redox homeostasis of the cell, forms the mitochondrial thioredoxin system with Trr2p, redox state is maintained by both Trr2p and Glr1p	3		-0.0035168	0.0868999	0.14169	-0.535474	0.476115	-0.0568488	0.506108	0.557631	0.759505	-0.0576279	0.110663	0.266483	0.357727	0.655595	0.015735
YCR084C	TUP1	General repressor of transcription, forms complex with Cyc8p, involved in the establishment of repressive chromatin structure through interactions with histones H3 and H4, appears to enhance expression of some genes	3	Sko1p/Cyc8p/Tup1 repressor complex, Tup1p/Ssn6p complex	-0.0051693	0.0939519	0.0618769	-0.0293467	-0.241835	0.0331453	-0.141616	-0.210392	0.0100931	-0.288516	0.0592685	0.066265	-0.161341	-0.228336	-0.174056
YCR086W	CSM1	Nucleolar protein that forms a complex with Lrs4p and then Mam1p at kinetochores during meiosis I to mediate accurate homolog segregation; required for condensin recruitment to the replication fork barrier site and rDNA repeat segregation	3	Csm1p/Lrs4p complex, monopolin complex	0.0564449	-0.0413261	0.112007	-0.197176	-0.0961217	-0.147333	-0.275297	-0.121782	-0.029892	-0.028256	-0.19575	-0.03785	-0.209509	-0.157386	-0.004066
YCR087C-A	YCR087C-A	Putative protein of unknown function; green fluorescent protein (GFP)-fusion protein localizes to the nucleolus; YCR087C-A is not an essential gene	3		0.0410815	-0.139168	-0.0284862	-0.173794	0.269379	-0.0323196	-0.0624099	0.0723652	-0.0933582	0.0690478	-0.0599175	0.138539	0.0692642	-0.338819	0.161534
YCR088W	ABP1	Actin-binding protein of the cortical actin cytoskeleton, important for activation of the Arp2/3 complex that plays a key role actin in cytoskeleton organization; phosphorylation within its PRR (Proline-Rich Region), mediated by Cdc28p and Pho85p, protects Abp1p from proteolysis mediated by its own PEST sequences	3		-0.0700444	0.029901	0.101135	0.217954	-0.312497	-0.0306865	-0.102613	-0.183414	-0.153469	-0.0918163	-0.0389195	-0.207147	0.0615867	0.144496	-0.203449
YCR090C	YCR090C	Putative protein of unknown function; green fluorescent protein (GFP)-fusion protein localizes to the cytoplasm and nucleus; YCR090C is not an essential gene	3		0.0328596	0.0922379	-0.0650306	-0.0088643	0.124334	-0.0480706	0.0482595	-0.0763762	-0.0384584	0.16506	-0.0405335	-0.327481	-0.279729	-0.580931	-0.502916
YCR092C	MSH3	Mismatch repair protein, forms dimers with Msh2p that mediate repair of insertion or deletion mutations and removal of nonhomologous DNA ends, contains a PCNA (Pol30p) binding motif required for genome stability	3	MSH2p/MSH3p complex	-0.200686	0.101945	0.00996035	0.315611	-0.0354279	-0.0242793	0.133843	0.148782	-0.0276342	0.112312	0.161951	0.011127	0.176397	0.0439505	-0.158784
YCR093W	CDC39	Component of the CCR4-NOT complex, which has multiple roles in regulating mRNA levels including regulation of transcription and destabilizing mRNAs by deadenylation; basal transcription factor	3	CCR4-NOT core complex	0.0588657	0.0158518	0.0313244	0.0420878	-0.00399007	0.0177058	0.0570841	0.0408587	-0.122436	0.25571	-0.0498605	0.009493	-0.101724	0.0538685	-0.093027
YCR094W	CDC50	Endosomal protein that interacts with phospholipid flippase Drs2p; interaction with Cdc50p is essential for Drs2p catalytic activity; mutations affect cell polarity and polarized growth; similar to Lem3p; CDC50 has a paralog, YNR048W, that arose from the whole genome duplication	3		-0.0811324	-0.338818	0.0321283	-0.307301	0.024608						-0.0684025	-0.105998	0.0747124	-0.0826965	0.029416
YCR098C	GIT1	Plasma membrane permease, mediates uptake of glycerophosphoinositol and glycerophosphocholine as sources of the nutrients inositol and phosphate; expression and transport rate are regulated by phosphate and inositol availability	3		-0.142094	0.538229	-0.00058796	-0.833087	1.13305	0.119574	-0.150546	-0.440502	0.140341	0.16469
YCR100C	YCR100C	Putative protein of unknown function	3		0.162701	0.409843	-0.385158	-1.93257	0.647935
YCR102C	YCR102C	Putative protein of unknown function, involved in copper metabolism; similar to C. carbonum toxD gene; member of the quinone oxidoreductase family	3		0.25931	1.10581	0.875808	1.45556	1.03748						0.038803	0.34555	0.694006	-0.383263	0.726632
YDL001W	RMD1	Cytoplasmic protein required for sporulation	4		-0.126763	0.0588829	-0.202906	-0.157319	-0.0815803	-0.0336841	-0.158785	0.0738236	0.065445	-0.0908063	-0.0057525	0.171927	-0.0835371	0.290703	0.284545
YDL002C	NHP10	Protein related to mammalian high mobility group proteins; preferentially binds DNA ends, protecting them from exonucleatic cleavage; likely component of the chromatin-remodeling complex INO80 complex; proposed to be involved in DNA repair	4	Ino80p complex	-0.0190787	-0.0551732	-0.0223442	0.152172	-0.131962	0.0450792	0.0605965	-0.10503	-0.10504	0.0414154	-0.0752135	-0.001732	-0.0568304	-0.125974	0.271634
YDL003W	MCD1	Essential subunit of the cohesin complex required for sister chromatid cohesion in mitosis and meiosis; apoptosis induces cleavage and translocation of a C-terminal fragment to mitochondria; expression peaks in S phase	4	nuclear cohesin complex	-0.0323295	0.198882	-0.190012	-0.103817	-0.218569	7.525e-05	0.0325594	-0.183855	-0.0589169	-0.349208	0.108951	-0.406215	-0.423325	-0.264393	-0.0983939
YDL004W	ATP16	Delta subunit of the central stalk of mitochondrial F1F0 ATP synthase, which is a large, evolutionarily conserved enzyme complex required for ATP synthesis; phosphorylated	4	F0/F1 ATP synthase (complex V)	0.159754	0.448768	0.318276	-0.186412	0.0962247	-0.120314	-0.260223	-0.528962	0.177851	-1.33702	-0.163041	-0.245637	-0.629936	-0.10212	0.153995
YDL005C	MED2	Subunit of the RNA polymerase II mediator complex; associates with core polymerase subunits to form the RNA polymerase II holoenzyme; essential for transcriptional regulation	4	Kornberg's mediator (SRB) complex	0.0004168	-0.0743859	-0.0856176	-0.0506552	-0.086831	0.0810232	-0.148366	-0.0817224	-0.0783651	-0.173123	0.0126685	0.089419	-0.118695	-0.14972	0.111865
YDL006W	PTC1	Type 2C protein phosphatase (PP2C); dephosphorylates Hog1p, inactivating osmosensing MAPK cascade; involved in Fus3p activation during pheromone response; deletion affects precursor tRNA splicing, mitochondrial inheritance, and sporulation	4							0.147668	-0.048905	0.223395	-0.241994	0.285685	0.0460115	-0.041025	-0.0356774	-0.0415695	0.211227
YDL007W	RPT2	One of six ATPases of the 19S regulatory particle of the 26S proteasome involved in the degradation of ubiquitinated substrates; required for normal peptide hydrolysis by the core 20S particle	4	19/22S regulator	0.053761	0.0001866	0.206744	-0.0593383	0.20413	0.00150025	0.0394734	0.13739	-0.0521753	0.252409	0.0335345	0.173802	0.430241	0.103581	0.115927
YDL010W	GRX6	Cis-golgi localized monothiol glutaredoxin that binds an iron-sulfur cluster; more similar in activity to dithiol than other monothiol glutaredoxins; involved in the oxidative stress response; functional overlap with GRX7	4		0.0051948	0.109033	-0.522147	0.396268	0.0650888	-0.103913	-0.0367531	-0.0780089	-0.324308	-0.117855	0.100807	-0.189627	-0.100954	-0.255213	0.030593
YDL014W	NOP1	Nucleolar protein, component of the small subunit processome complex, which is required for processing of pre-18S rRNA; has similarity to mammalian fibrillarin	4	box C/D snoRNP complex	0.0049743	-0.0992453	-0.00127661	-0.246913	-0.0469539	-0.00951085	-0.0896717	-0.175744	-0.0191624	-0.137812	0.0352905	-0.075444	-0.0144335	-0.583144	0.017372
YDL015C	TSC13	Enoyl reductase; catalyzes the last step in each cycle of very long chain fatty acid elongation; localizes to the ER, highly enriched in a structure marking nuclear-vacuolar junctions; coimmunoprecipitates with elongases Fen1p and Sur4p; protein abundance increases in response to DNA replication stress	4		-0.175876	0.0109192	0.00796395	0.0091252	0.0168017	-0.0611429	-0.0105049	-0.0153695	0.124301	-0.0144817	-0.0284775	0.213962	0.0521981	0.234859	0.148977
YDL017W	CDC7	DDK (Dbf4-dependent kinase) catalytic subunit required for origin firing and replication fork progression in mitotic S phase through phosphorylation of Mcm2-7p complexes and Cdc45p; kinase activity correlates with cyclical DBF4 expression; required for pre-meiotic DNA replication, meiotic DSB formation, recruitment of the monopolin complex to kinetochores during meiosis I and as a gene-specific r…	4	Cdc7p/Dbf4p complex	0.161497	0.187219	0.134309	0.140163	0.479206	0.15126	0.148523	0.589201	-0.159367	0.415696	0.105344	0.162821	0.292088	0.35576	0.378149
YDL018C	ERP3	Protein with similarity to Emp24p and Erv25p, member of the p24 family involved in ER to Golgi transport	4		-0.0298653	-0.0412555	0.0357693	-0.156509	-0.126886	0.0364417	-0.139638	0.0479502	0.0741905	0.0157776	-0.0748905	0.021096	-0.449804	-0.0386685	0.011148
YDL019C	OSH2	Member of an oxysterol-binding protein family with seven members in S. cerevisiae; family members have overlapping, redundant functions in sterol metabolism and collectively perform a function essential for viability	4		0.0380075	0.0268089	-0.148747	0.0548308	-0.0116098	0.110396	-0.0763895	-0.140976	-0.14038	-0.335901	-0.0137845	0.212667	0.0572662	0.198783	0.117067
YDL021W	GPM2	Homolog of Gpm1p phosphoglycerate mutase, which converts 3-phosphoglycerate to 2-phosphoglycerate in glycolysis; may be non-functional derivative of a gene duplication event	4		0.577998	0.802549	0.608973	0.374936	1.10783	-0.376005	-0.0328241	-0.111871	-0.0060182	-0.0654724	0.193116	0.575086	-0.642989	0.0743875	-0.046832
YDL022W	GPD1	NAD-dependent glycerol-3-phosphate dehydrogenase; key enzyme of glycerol synthesis, essential for growth under osmotic stress; expression regulated by high-osmolarity glycerol response pathway; homolog of Gpd2p; protein abundance increases in response to DNA replication stress	4		0.0246229	-0.155582	-0.160681	-0.986623	-0.265177	0.00319145	-0.273767	-0.244034	-0.477309	-0.907681	0.0906547	0.480946	-0.887598	-0.463952	-0.373063
YDL025C	YDL025C	Putative protein kinase, potentially phosphorylated by Cdc28p; interacts with ribosome biogenesis factors, Cka2, Gus1 and Arc1; protein abundance increases in response to DNA replication stress	4		0.0625881	0.0356164	0.370625	-0.0722153	0.427437	-0.0206231	-0.167814	0.00074467	0.323308	-0.229909	-0.109397	0.278631	0.503451	0.530159	-0.0697857
YDL027C	YDL027C	Putative protein of unknown function; the authentic, non-tagged protein is detected in highly purified mitochondria in high-throughput studies; YDL027C is not an essential gene	4		-0.0773954	0.0098721	0.386183	0.332437	0.0818946	0.0912667	-0.0923717	0.030109	0.125741	0.107797	-0.0504745	0.286731	0.028621	0.360806	0.360229
YDL028C	MPS1	Dual-specificity kinase required for spindle pole body (SPB) duplication and spindle checkpoint function; substrates include SPB proteins Spc42p, Spc110p, and Spc98p, mitotic exit network protein Mob1p, and checkpoint protein Mad1p	4												-0.0537265	-0.101693	-0.176771	0.475228	-0.136142
YDL029W	ARP2	Essential component of the Arp2/3 complex, which is a highly conserved actin nucleation center required for the motility and integrity of actin patches; involved in endocytosis and membrane growth and polarity	4	Arp2/3 protein complex	-0.0319522	0.0999089	0.209125	0.469949	-0.0218113	-0.00675235	0.101858	0.131771	0.189836	0.173235	-0.0217885	0.002024	0.403677	0.347953	0.099039
YDL030W	PRP9	Subunit of the SF3a splicing factor complex, required for spliceosome assembly; acts after the formation of the U1 snRNP-pre-mRNA complex	4	Prp9p/Prp11p/Prp21p complex(SF3a complex), U2 snRNP complex	0.194825	-0.0444965	0.289344	-0.456827	0.26395	-0.151874	-0.1287	-0.228516	0.405277	-0.139832	0.0169005	0.252983	-0.0761531	0.0863765	0.23483
YDL031W	DBP10	Putative ATP-dependent RNA helicase of the DEAD-box protein family, constituent of 66S pre-ribosomal particles; essential protein involved in ribosome biogenesis	4		0.0336384	-0.11447	0.223539	-0.0943014	0.199346	0.0316436	0.00575042	0.0557595	0.0691299	0.0476823	0.0256355	0.059506	0.242382	-0.40514	-0.004796
YDL036C	PUS9	Mitochondrial tRNA:pseudouridine synthase, catalyzes the formation of pseudouridine at position 32 in mitochondrial tRNAs; contains an N-terminal mitochondrial targeting sequence	4		0.113149	-0.0014295	-0.283126	0.182556	-0.0504381						0.0604575	0.148913	0.0020957	-0.16243	-0.025635
YDL040C	NAT1	Subunit of the N-terminal acetyltransferase NatA (Nat1p, Ard1p, Nat5p); N-terminally acetylates many proteins, which influences multiple processes such as the cell cycle, heat-shock resistance, mating, sporulation, and telomeric silencing	4	NatA complex	-0.0087728	-0.0057277	0.0860453	-0.0404459	0.25722	0.0354131	-0.0647162	0.0956485	-0.201071	0.0651685	-0.0467895	-0.094653	0.0008533	-0.140888	-0.031411
YDL042C	SIR2	Conserved NAD+ dependent histone deacetylase of the Sirtuin family; involved in regulation of lifespan; plays roles in silencing at HML, HMR, telomeres, and the rDNA locus; negatively regulates initiation of DNA replication; functions as a regulator of autophagy like mammalian homolog SIRT1, and also of mitophagy	4	chromatin silencing complex, RENT complex	0.109638	0.128576	-0.527241	-0.635962	0.161866	0.00758155	-0.0614948	-0.0571439	-0.116957	0.368761	0.0088665	-0.087326	-0.173105	-0.425149	-0.232648
YDL043C	PRP11	Subunit of the SF3a splicing factor complex, required for spliceosome assembly	4	Prp9p/Prp11p/Prp21p complex(SF3a complex), U2 snRNP complex	-0.234155	0.0801869	-0.055155	0.217646	0.115356	0.116724	-0.199571	-0.11386	0.162585	0.050909	-0.0357945	0.143318	-0.0812061	0.206949	0.032821
YDL044C	MTF2	Mitochondrial matrix protein that interacts with an N-terminal region of mitochondrial RNA polymerase (Rpo41p) and couples RNA processing and translation to transcription	4		0.0291765	0.0488229	-0.0317257	0.0099294	-0.0641026	0.0129683	0.0407071	-0.330617	0.166124	-0.3909	0.0519825	0.410394	-0.113504	0.492902	-0.019515
YDL045C	FAD1	Flavin adenine dinucleotide (FAD) synthetase, performs the second step in synthesis of FAD from riboflavin	4		0.111056	-0.043534	0.20419	0.164725	0.247194	0.0973601	0.253983	0.209034	0.0455317	0.196878	0.0250835	0.467619	0.342469	0.487135	0.127163
YDL045W-A	MRP10	Mitochondrial ribosomal protein of the small subunit; contains twin cysteine-x9-cysteine motifs	4	mitochondrial ribosomal small subunit	0.0051388	-0.0244235	0.178554	-0.210765	-0.358497	-0.00961375	-0.0436572	-0.0632561	0.222363	-0.832133	-0.271567	-0.012621	-0.51093	0.339564	-0.402156
YDL047W	SIT4	Type 2A-related serine-threonine phosphatase that functions in the G1/S transition of the mitotic cycle; cytoplasmic and nuclear protein that modulates functions mediated by Pkc1p including cell wall and actin cytoskeleton organization	4	Sap190p/Sit4p complex, Sap155p/Sit4p complex, Tap42p/Sit4p/Rrd1p complex, Sap185p/Sit4p complex	0.0508276	0.0006651	-0.123708	-0.271301	-0.254774	0.0921988	-0.177	-0.216306	-0.240489	-0.0395247	0.0625705	-0.023879	-0.295429	-0.111164	-0.006757
YDL051W	LHP1	RNA binding protein required for maturation of tRNA and U6 snRNA precursors; acts as a molecular chaperone for RNAs transcribed by polymerase III; homologous to human La (SS-B) autoantigen	4		-0.0329196	-0.0119166	-0.112508	0.0454808	0.129327	-0.00393835	0.0549664	-0.0848395	-0.0482175	0.328107	0.0331535	-0.202449	-0.369936	-0.638983	-0.0892566
YDL052C	SLC1	1-acyl-sn-glycerol-3-phosphate acyltransferase, catalyzes the acylation of lysophosphatidic acid to form phosphatidic acid, a key intermediate in lipid metabolism; enzymatic activity detected in lipid particles and microsomes	4		0.0024217	0.0826229	-0.21985	0.123293	0.107416	-0.0384261	0.210607	0.13288	0.202025	0.210677	0.108239	0.310603	0.241296	0.0830535	0.250965
YDL053C	PBP4	Pbp1p binding protein, interacts strongly with Pab1p-binding protein 1 (Pbp1p) in the yeast two-hybrid system; also interacts with Lsm12p in a copurification assay	4		0.0200789	-0.0346635	0.0884344	-0.19894	0.0963757	-0.0733856	-0.0431433	-0.17096	0.0407926	-0.101971	0.0494015	0.041412	-0.126096	0.117658	-0.0778609
YDL055C	PSA1	GDP-mannose pyrophosphorylase (mannose-1-phosphate guanyltransferase), synthesizes GDP-mannose from GTP and mannose-1-phosphate in cell wall biosynthesis; required for normal cell wall structure	4		-0.057671	-0.066961	-0.292361	-0.375088	-0.419144	-0.0395659	0.0230807	-0.539449	-0.0820482	-0.146144	-0.0680075	-0.340921	-0.659151	-0.582439	-0.231274
YDL056W	MBP1	Transcription factor involved in regulation of cell cycle progression from G1 to S phase, forms a complex with Swi6p that binds to MluI cell cycle box regulatory element in promoters of DNA synthesis genes	4	MBF complex	-0.0496832	0.0576619	0.102894	-0.0509073	-0.018298	0.0784642	-0.130141	-0.308813	-0.0690808	-0.301052	0.0453335	-0.064606	-0.127609	-0.225969	-0.0539339
YDL058W	USO1	Essential protein involved in the vesicle-mediated ER to Golgi transport step of secretion; binds membranes and functions during vesicle docking to the Golgi; required for assembly of the ER-to-Golgi SNARE complex	4		0.0382164	0.0334889	-0.0482567	0.0654778	0.0865477	0.0183728	0.0180068	-0.0575462	-0.167476	0.324394	0.0184365	-0.241115	0.0239863	-0.276585	-0.450037
YDL060W	TSR1	Protein required for processing of 20S pre-rRNA in the cytoplasm; associates with pre-40S ribosomal particles; inhibits the premature association of 60S subunits with assembling 40S subunits in the cytoplasm; similar to Bms1p	4		-0.0246477	0.0073781	-0.179486	0.131518	0.106628	-0.121346	0.0507076	0.00261441	-0.21316	0.0634266	0.0257535	-0.07261	0.259045	-0.263018	-0.0516392
YDL061C	RPS29B	Protein component of the small (40S) ribosomal subunit; homologous to mammalian ribosomal protein S29 and bacterial S14; RPS29B has a paralog, RPS29A, that arose from the whole genome duplication	4	cytoplasmic ribosomal small subunit	-0.0426254	-0.223112	0.0541971	-0.16442	-0.0382668	-0.10609	-0.110314	-0.285835	-0.256097	-2.00843	-0.110227	-0.494966	-0.185803	-0.329668	-0.220724
YDL063C	YDL063C	Protein required for biogenesis of the large ribosomal subunit; green fluorescent protein (GFP)-fusion protein localizes to the cytoplasm and nucleus	4		-0.117762	-0.0311919	-0.2704	0.192133	0.0465132	-0.0560127	0.15098	0.100398	-0.138214	-0.0018846	0.0742476	0.386445	0.238852	-0.165126	0.257399
YDL064W	UBC9	SUMO-conjugating enzyme involved in the Smt3p conjugation pathway; nuclear protein required for S- and M-phase cyclin degradation and mitotic control; involved in proteolysis mediated by the anaphase-promoting complex cyclosome (APCC)	4		-0.100287	-0.1271	-0.339488	-0.0748789	-0.504156	0.141067	-0.253009	-0.293133	-0.476421	-0.22217	-0.0450585	-0.041894	-0.356432	-0.665668	-0.275458
YDL065C	PEX19	Chaperone and import receptor for newly-synthesized class I PMPs; binds peroxisomal membrane proteins (PMPs) in the cytoplasm and delivers them to the peroxisome for subsequent insertion into the peroxisomal membrane; interacts with Myo2p and contributes to peroxisome partitioning	4		-0.0526311	-0.0846556	0.189252	-0.307488	0.325139	-0.00812715	0.126804	0.00550439	-0.0215579	0.338348	-0.0346055	0.072001	0.222637	0.482531	0.163736
YDL066W	IDP1	Mitochondrial NADP-specific isocitrate dehydrogenase, catalyzes the oxidation of isocitrate to alpha-ketoglutarate; not required for mitochondrial respiration and may function to divert alpha-ketoglutarate to biosynthetic processes	4		-0.0494597	-0.176687	0.00096029	-0.145257	-0.224955	-0.0631666	-0.219494	-0.279692	0.0133631	0.250901	-0.0651825	-0.52522	0.281835	-0.354154	-0.319159
YDL070W	BDF2	Protein involved in transcription initiation; acts at TATA-containing promoters; associates with the basal transcription factor TFIID; contains two bromodomains; corresponds to the C-terminal region of mammalian TAF1; redundant with Bdf1p; protein abundance increases in response to DNA replication stress	4		0.280775	0.0759009	0.306998	-0.237243	0.142774	0.075082	0.447988	0.0231602	-0.0591484	0.696934	0.198789	0.138374	0.0528906	-0.260197	0.049158
YDL072C	YET3	Protein of unknown function; YET3 null mutant decreases the level of secreted invertase; homolog of human BAP31 protein; protein abundance increases in response to DNA replication stress	4		-0.0755444	0.125618	0.194215	-0.154913	0.176551	-0.104666	-0.0128655	0.341818	0.539701	0.48346	0.0034755	0.177684	0.439188	0.626745	0.282187
YDL073W	YDL073W	Putative protein of unknown function; YDL073W is not an essential gene	4		-0.0572751	-0.185856	0.293269	-0.276591	-0.0810748	0.0777908	-0.0273288	0.350045	0.0252747	0.249348	0.0462845	-0.070889	0.117965	0.0515805	0.020844
YDL074C	BRE1	E3 ubiquitin ligase, forms heterodimer with Rad6p to monoubiquinate histone H2B-K123, which is required for the subsequent methylation of histone H3-K4 and H3-K79; required for DSBR, transcription, silencing, and checkpoint control	4	Lge1p/Bre1p complex	-0.0129932	0.0494029	-0.0127535	0.0197987	-0.266108	0.0677598	-0.0498183	-0.342686	-0.208152	-0.0720782	-0.0061055	-0.075797	-0.0839071	-0.414338	0.102741
YDL075W	RPL31A	Ribosomal 60S subunit protein L31A; associates with karyopherin Sxm1p; loss of both Rpl31p and Rpl39p confers lethality; homologous to mammalian ribosomal protein L31, no bacterial homolog; RPL31A has a paralog, RPL31B, that arose from the whole genome duplication	4	cytoplasmic ribosomal large subunit	0.0064601	0.0426845	-0.0774036	-0.311252	-0.0667878	-0.115143	0.0856268	-0.276937	0.239216	-0.172528	-0.0555885	-0.842205	-0.0155781	-1.03723	-0.739532
YDL076C	RXT3	Subunit of the RPD3L complex; involved in histone deacetylation; protein abundance increases in response to DNA replication stress	4	Rpd3L complex	0.054453	0.277096	0.138554	-0.0414387	-0.0283175						0.225595	-0.033129	0.0177141	-0.174199	0.115549
YDL077C	VAM6	Vacuolar protein that plays a critical role in the tethering steps of vacuolar membrane fusion by facilitating guanine nucleotide exchange on small guanosine triphosphatase Ypt7p	4	HOPS complex	0.19152	-0.12409	0.217781	-0.0824393	0.209878	-0.23541	0.0502677	0.0774645	-0.00867925	0.21412	0.0994498	-0.029581	0.154981	0.360893	-0.189468
YDL078C	MDH3	Peroxisomal malate dehydrogenase, catalyzes interconversion of malate and oxaloacetate; involved in the glyoxylate cycle	4		-0.0212271	-0.0584873	-0.0442447	-0.196217	-0.175754	-0.0139649	-0.043176	-0.0837694	-0.154649	-0.200418	-0.0506455	-0.16236	-0.0605641	0.268744	-0.10919
YDL082W	RPL13A	Ribosomal 60S subunit protein L13A; not essential for viability; homologous to mammalian ribosomal protein L13, no bacterial homolog; RPL13A has a paralog, RPL13B, that arose from the whole genome duplication	4	cytoplasmic ribosomal large subunit	-0.0045241	-0.203324	-0.212717	-0.354384	-0.192946	0.0044891	-0.0834062	-0.22124	0.0535592	-0.114371	-0.024098	-0.315287	-0.273796	-0.687982	-0.394745
YDL083C	RPS16B	Protein component of the small (40S) ribosomal subunit; homologous to mammalian ribosomal protein S16 and bacterial S9; RPS16B has a paralog, RPS16A, that arose from the whole genome duplication	4	cytoplasmic ribosomal small subunit	-0.0264094	-0.0793342	-0.115949	0.0130506	-0.243718	0.0254983	0.125554	-0.0280791	-0.0111566	-0.181581	-0.077615	-0.337516	-0.237176	-0.567997	-0.325473
YDL084W	SUB2	Component of the TREX complex required for nuclear mRNA export; member of the DEAD-box RNA helicase superfamily and is involved in early and late steps of spliceosome assembly; homolog of the human splicing factor hUAP56	4	transcription export complex	-0.0745004	-0.0365219	-0.0642314	-0.334899	-0.218882	-0.0720577	-0.186209	-0.283281	-0.236497	-0.38242	-0.0558925	-0.216059	-0.262324	-0.282235	-0.134308
YDL085C-A	YDL085C-A	Putative protein of unknown function; green fluorescent protein (GFP)-fusion protein localizes to the cytoplasm and nucleus	4		0.196407	0.295936	-0.0920984	0.137154	-0.461061	-0.123153	0.0180644	0.0976258	0.24778	-0.403469	-0.15009	0.163712	0.441123	-0.168006	0.140112
YDL086W	YDL086W	Putative protein of unknown function; the authentic, non-tagged protein is detected in highly purified mitochondria in high-throughput studies; YDL086W is not an essential gene	4		0.0203129	-0.0463497	-0.110126	0.190201	-0.319731	0.0670577	-0.0161452	0.296682	-0.834349	-0.637098	-0.234748	0.361062	-0.627491	-1.02745	-0.248872
YDL087C	LUC7	Essential protein associated with the U1 snRNP complex; splicing factor involved in recognition of 5' splice site; contains two zinc finger motifs; N-terminal zinc finger binds pre-mRNA	4	commitment complex, U1 snRNP complex	-0.0969044	0.0925379	0.13204	-8.28e-05	0.00612715						0.134952	-0.101975	0.194078	-0.248625	0.301036
YDL088C	ASM4	FG-nucleoporin component of central core of the nuclear pore complex (NPC); contributes directly to nucleocytoplasmic transport; induces membrane tubulation, which may contribute to nuclear pore assembly	4	karyopherin docking subcomplex of the Nuclear Pore Complex (NPC)	0.107461	0.007101	-0.0365774	0.0320262	-0.0429844	0.0440566	-0.146172	-0.264381	-0.154706	0.0951792	-0.0072135	-0.082352	0.108302	-0.0645285	0.007308
YDL089W	NUR1	Protein of unknown function; interacts with Csm1p, Lrs4p; required for rDNA repeat stability; null mutant causes increase in unequal sister-chromatid exchange; GFP-fusion protein localizes to the nuclear periphery, possible Cdc28p substrate	4		0.148106	0.0227521	0.0855184	0.111827	0.286286	0.00064545	-0.0314427	0.0776161	-0.0646879	0.0198196	-0.0050815	0.126919	0.169554	0.0909365	0.286811
YDL090C	RAM1	Beta subunit of the CAAX farnesyltransferase (FTase) that prenylates the a-factor mating pheromone and Ras proteins; required for the membrane localization of Ras proteins and a-factor; homolog of the mammalian FTase beta subunit	4	protein farnesyltransferase complex	-0.0450195	0.130067	-0.0139528	0.443115	0.236587						-0.0460465	0.165395	0.32455	-0.0354315	0.082298
YDL092W	SRP14	Signal recognition particle (SRP) subunit, interacts with the RNA component of SRP to form the Alu domain, which is the region of SRP responsible for arrest of nascent chain elongation during membrane targeting; homolog of mammalian SRP14	4	Signal recognition particle (SRP)	-0.060616	-0.12099	0.0505492	-0.0528201	-0.305122	-0.0646757	-0.272815	-0.373768	0.0831016	-0.268701	-0.173659	-0.165961	-0.290315	-0.327368	-0.050628
YDL095W	PMT1	Protein O-mannosyltransferase of the ER membrane; transfers mannose from dolichyl phosphate-D-mannose to protein serine and threonine residues; 1 of 7 related proteins involved in O-glycosylation which is essential for cell wall rigidity; involved in ER quality control; amino terminus faces cytoplasm, carboxyl terminus faces ER lumen	4	Protein O-mannosyltransferase(Pmt1p/Pmt2p)	-0.0213923	0.0108805	-0.119647	0.0620238	-0.0498711	-0.0464735	0.0258329	-0.204008	-0.00096115	-0.238969	0.0576305	0.112557	0.0055188	-0.313545	0.312898
YDL097C	RPN6	Essential, non-ATPase regulatory subunit of the 26S proteasome lid; required for the assembly and activity of the 26S proteasome; the human homolog (S9 protein) partially rescues Rpn6p depletion; protein abundance increases in response to DNA replication stress	4	19/22S regulator	-0.0062455	0.0082751	0.307606	0.0841178	0.212518	0.0606248	0.0719185	0.409398	-0.0235653	0.210347	0.0691155	0.172637	0.242278	0.293553	0.223675
YDL098C	SNU23	Component of U4/U6.U5 snRNP involved in mRNA splicing via spliceosome	4	U4/U6 x U5 tri-snRNP complex	0.585208	0.0535939	0.350952	0.167733	0.398865	-0.0699057	-0.181451	-0.237939	-0.104249	-0.0518869	-0.0552735	-0.22508	-0.336052	-0.376076	-0.0750263
YDL099W	BUG1	Cis-golgi localized protein involved in ER to Golgi transport; forms a complex with the mammalian GRASP65 homolog, Grh1p; mutants are compromised for the fusion of ER-derived vesicles with Golgi membranes	4	Grh1p/Bug1p complex	0.056853	-0.108096	-0.124154	0.0680598	-0.305325	0.0451193	0.0834406	0.035443	-0.355076	-0.0476178	0.0066465	-0.163721	-0.103886	0.0554195	-0.229946
YDL100C	GET3	Guanine nucleotide exchange factor for Gpa1p; amplifies G protein signaling; subunit of the GET complex, which is involved in Golgi to ER trafficking and insertion of proteins into the ER membrane; has low-level ATPase activity; protein abundance increases in response to DNA replication stress	4	GET complex	-0.0574438	-0.0298271	0.0886767	-0.156419	0.0736265	0.0114231	0.0889533	0.0816742	0.0104978	0.275702	-0.0196875	-0.144377	0.0717709	-0.267651	0.021677
YDL101C	DUN1	Cell-cycle checkpoint serine-threonine kinase required for DNA damage-induced transcription of certain target genes, phosphorylation of Rad55p and Sml1p, and transient G2/M arrest after DNA damage; also regulates postreplicative DNA repair	4		-0.0650205	0.205549	0.0145365	0.45955	0.21175	0.0529924	0.0740911	0.166525	0.0350043	0.278558	0.0594655	-0.127253	0.185234	0.348398	0.161597
YDL102W	POL3	Catalytic subunit of DNA polymerase delta; required for chromosomal DNA replication during mitosis and meiosis, intragenic recombination, repair of double strand DNA breaks, and DNA replication during nucleotide excision repair (NER)	4	DNA polymerase delta complex	-0.026697	-0.0539136	0.0588982	0.0642278	0.14712	0.0546251	0.0829781	0.434934	3.355e-05	-0.104534	-0.0034825	0.080898	0.1287	0.183359	0.210867
YDL103C	QRI1	UDP-N-acetylglucosamine pyrophosphorylase; catalyzes the formation of UDP-N-acetylglucosamine (UDP-GlcNAc), which is important in cell wall biosynthesis, protein N-glycosylation, and GPI anchor biosynthesis; protein abundance increases in response to DNA replication stress	4		0.0328423	-0.078915	-0.011815	0.0247807	-0.0901158	-0.0749666	-0.0788165	-0.108797	-0.0656082	-0.116959	-0.0115825	-0.117137	-0.0946921	-0.0380915	-0.0954864
YDL105W	NSE4	Component of the SMC5-SMC6 complex; this complex plays a key role in the removal of X-shaped DNA structures that arise between sister chromatids during DNA replication and repair	4	smc5p-Smc6p complex	-0.0494138	-0.0911262	-0.310467	0.250884	-0.242287
YDL106C	PHO2	Homeobox transcription factor; regulatory targets include genes involved in phosphate metabolism; binds cooperatively with Pho4p to the PHO5 promoter; phosphorylation of Pho2p facilitates interaction with Pho4p	4		0.0141117	0.0264335	-0.254795	0.170651	0.00031558	0.217033	-0.180022	-0.0546736	-0.0697465	0.453289	0.135981	-0.066886	0.0818699	0.181484	0.116215
YDL107W	MSS2	Peripherally bound inner membrane protein of the mitochondrial matrix involved in membrane insertion of C-terminus of Cox2p, interacts genetically and physically with Cox18p	4							0.0456933	-0.0056651	0.0902037	0.111122	-0.0597787
YDL108W	KIN28	Serine/threonine protein kinase, subunit of the transcription factor TFIIH; involved in transcription initiation at RNA polymerase II promoters	4	transcription factor TFIIH complex						0.0256135	0.291807	0.29121	0.35994	0.184983	0.0239815	0.437842	-0.174705	0.318633	0.252173
YDL110C	TMA17	Protein of unknown function that associates with ribosomes; heterozygous deletion demonstrated increases in chromosome instability in a rad9 deletion background; protein abundance is decreased upon intracellular iron depletion	4		-0.0094561	0.164579	0.00240665	-0.384762	0.0158797	0.0948405	0.359144	-0.0298378	1.04997	-0.161137	0.18802	-0.033601	-0.123137	0.948476	0.248773
YDL111C	RRP42	Exosome non-catalytic core component; involved in 3'-5' RNA processing and degradation in both the nucleus and the cytoplasm; has similarity to E. coli RNase PH and to human hRrp42p (EXOSC7)	4	Nuclear exosome complex, Cytoplasmic exosome complex	0.0488633	-0.0043322	-0.0116459	0.207639	0.0660334	-0.0251	0.0240626	-0.104455	0.151736	0.0631908	-0.141995	-0.123274	-0.247878	-0.314711	-0.133694
YDL112W	TRM3	2'-O-ribose methyltransferase, catalyzes the ribose methylation of the guanosine nucleotide at position 18 of tRNAs	4		0.0323531	0.0646609	-0.0446446	0.33329	0.253545	0.0817124	0.101763	0.345761	-0.107905	0.118093	-0.0160925	0.070182	0.0170991	-0.124327	-0.017636
YDL113C	ATG20	Sorting nexin family member required for the cytoplasm-to-vacuole targeting (Cvt) pathway and for endosomal sorting; has a Phox homology domain that binds phosphatidylinositol-3-phosphate; interacts with Snx4p; potential Cdc28p substrate	4	Atg20p/Snx4p/Snx41p complex	-0.106479	0.107313	0.0971386	0.471977	-0.00341928	0.0414199	0.345284	0.333459	0.123257	0.27134	0.252316	0.438444	0.574242	0.964776	0.501252
YDL115C	IWR1	RNA polymerase II transport factor, conserved from yeast to humans; involved in both basal and regulated transcription from RNA polymerase II (RNAP II) promoters, but not itself a transcription factor; interacts with most of the RNAP II subunits; nucleo-cytoplasmic shuttling protein; deletion causes hypersensitivity to K1 killer toxin; protein abundance increases in response to DNA replication st…	4		-0.0415617	-0.0480182	-0.0381724	0.113803	-0.156097	-0.0126679	-0.189176	-0.262373	-0.179273	-0.0418143	0.0458405	0.191184	0.027497	0.0757085	-0.117634
YDL116W	NUP84	Subunit of the Nup84p subcomplex of the nuclear pore complex (NPC); contributes to nucleocytoplasmic transport and NPC biogenesis; also plays roles in several processes that may require localization of genes or chromosomes at the nuclear periphery, including double-strand break repair, transcription and chromatin silencing; homologous to human NUP107	4	Nup84p complex	0.0246439	0.107315	0.0808828	0.0159261	0.0423332	0.136509	-0.0573758	0.154082	0.101538	-0.0040319	0.137827	-0.057578	0.251788	-0.136223	0.109554
YDL117W	CYK3	SH3-domain protein located in the mother-bud neck and the cytokinetic actin ring; mutant phenotype and genetic interactions suggest a role in cytokinesis	4		0.0456428	-0.078446	0.0443732	-0.0530057	0.034433	0.0296993	-0.0051295	0.058863	0.123239	0.131313	0.0926465	0.215769	-0.109498	0.700576	0.124535
YDL120W	YFH1	Mitochondrial matrix iron chaperone; oxidizes and stores iron; interacts with Isu1p to promote Fe-S cluster assembly; mutation results in multiple Fe/S-dependent enzyme deficiencies; human frataxin homolog is mutated in Friedrich's ataxia	4												0.270608	0.36493	0.944103	0.958015	0.795592
YDL121C	YDL121C	Putative protein of unknown function; green fluorescent protein (GFP)-fusion protein localizes to the endoplasmic reticulum; YDL121C is not an essential protein	4		0.0047265	-0.16823	0.017739	0.0730438	0.267725	0.0706881	0.118559	0.291003	0.134355	0.313049	0.0100955	0.116303	0.201441	0.157182	0.16932
YDL122W	UBP1	Ubiquitin-specific protease that removes ubiquitin from ubiquitinated proteins; cleaves at the C terminus of ubiquitin fusions irrespective of their size; capable of cleaving polyubiquitin chains	4		0.0041666	-0.0772471	0.0138691	-0.0496486	-0.100707	-0.0670737	-0.0026054	-0.106472	0.0196846	0.025922	0.0168065	0.067583	0.0344326	-0.0216195	0.061168
YDL124W	YDL124W	NADPH-dependent alpha-keto amide reductase; reduces aromatic alpha-keto amides, aliphatic alpha-keto esters, and aromatic alpha-keto esters; member of the aldo-keto reductase (AKR) family; protein abundance increases in response to DNA replication stress	4		-0.113403	0.331534	0.0785793	-0.530995	0.396791	-0.00474345	0.306564	0.455389	0.112518	-0.861408	-0.0659015	1.09577	0.271134	-0.0970855	-0.293552
YDL125C	HNT1	Adenosine 5'-monophosphoramidase; interacts physically and genetically with Kin28p, a CDK and TFIIK subunit, and genetically with CAK1; member of the histidine triad (HIT) superfamily of nucleotide-binding proteins and similar to Hint; protein abundance increases in response to DNA replication stress	4		-0.15597	0.794795	0.661604	0.0572618	0.584427	-0.0982297	0.907418	0.541625	0.95745	0.713757	0.0946478	0.320661	-0.0896821	0.403066	0.066814
YDL126C	CDC48	AAA ATPase involved in multiple processes; subunit of a polyubiquitin-selective segregase complex involved in ERAD, cell wall integrity during heat stress and mitotic spindle disassembly; subunit of a complex involved in mitochondria-associated degradation; role in mobilizing membrane bound transcription factors by regulated ubiquitin/proteasome-dependent processing; roles in macroautophagy, PMN,…	4	Cdc48p complex	0.0099783	-0.132601	0.214844	-0.301643	0.0559009	0.00143665	-0.0046131	0.160883	-0.0672053	0.186641	-0.0348665	0.0287	0.239275	-0.0654555	-0.20121
YDL130W	RPP1B	Ribosomal protein P1 beta, component of the ribosomal stalk, which is involved in interaction of translational elongation factors with ribosome; accumulation is regulated by phosphorylation and interaction with the P2 stalk component	4	cytoplasmic ribosomal large subunit	0.0152413	-0.245545	-0.238283	-0.203395	-0.286052	0.0397262	-0.0050842	-0.21528	0.0166021	-0.302204	0.101268	-0.385182	-0.12873	-0.615503	-0.148129
YDL130W-A	STF1	Protein involved in regulation of the mitochondrial F1F0-ATP synthase; Stf1p and Stf2p act as stabilizing factors that enhance inhibitory action of the Inh1p protein; protein abundance increases in response to DNA replication stress	4	mitochondrial ATPase inhibitor complex	0.146347	0.0836859	0.341206	-0.0881508	0.174912	-0.14147	-0.0478563	0.404178	0.766572	0.215812	-0.33467	-0.104474	0.206034	0.660416	-0.205948
YDL131W	LYS21	Homocitrate synthase isozyme; catalyzes the condensation of acetyl-CoA and alpha-ketoglutarate to form homocitrate, which is the first step in the lysine biosynthesis pathway; LYS21 has a paralog, LYS20, that arose from the whole genome duplication	4		-0.0168676	0.425003	-0.53741	0.0632248	0.150666	0.00640835	0.290871	0.127349	0.469528	0.701764	-0.0089875	-0.706367	0.0980758	-0.535736	-0.029674
YDL132W	CDC53	Cullin, structural protein of SCF complexes (which also contain Skp1p, Cdc34p, Hrt1p and an F-box protein) involved in ubiquitination; SCF promotes the G1-S transition by targeting G1 cyclins and the Cln-CDK inhibitor Sic1p for degradation	4	SCF-CDC4 complex, nuclear ubiquitin ligase complex	-0.0420693	0.0426536	0.148248	-0.07186	0.298176	-0.0326094	0.164036	0.326611	0.1164	0.31432	0.0137375	0.149321	0.408924	0.308822	0.091152
YDL134C	PPH21	Catalytic subunit of protein phosphatase 2A (PP2A), functionally redundant with Pph22p; methylated at C terminus; forms alternate complexes with several regulatory subunits; involved in signal transduction and regulation of mitosis	4	protein phosphatase type 2A complex (Cdc55p), protein phosphatase type 2A complex (Rts1p), Tap42p/Pph21p/Rrd2p complex	0.0671565	0.095185	0.0828061	-0.323197	-0.235313						0.019081	-0.0131145	0.0077456	-0.089837	-0.302831
YDL135C	RDI1	Rho GDP dissociation inhibitor; involved in the localization and regulation of Cdc42p and Rho1p; protein abundance increases in response to DNA replication stress	4		-0.0320196	-0.139531	0.0694677	-0.154352	-0.183592	-0.0945017	-0.0656818	-0.294363	-0.00030745	-0.030101	0.0365055	-0.342774	-0.199665	0.0410985	0.046806
YDL136W	RPL35B	Ribosomal 60S subunit protein L35B; homologous to mammalian ribosomal protein L35 and bacterial L29; RPL35B has a paralog, RPL35A, that arose from the whole genome duplication	4	cytoplasmic ribosomal large subunit	-0.0216602	-0.197859	-0.290435	-0.341607	-0.289874	-0.0960243	-0.151397	-0.292643	-0.0902338	-0.259759	-0.006283	-0.536714	-0.378961	-0.723214	-0.492687
YDL137W	ARF2	ADP-ribosylation factor, GTPase of the Ras superfamily involved in regulation of coated formation vesicles in intracellular trafficking within the Golgi; functionally interchangeable with Arf1p	4		0.0137646	0.483916	0.388386	0.900808	0.259421	0.0027729	0.374121	0.275141	-0.583889	-0.199277	0.033732	0.214905	0.194174	-0.390191	-0.013358
YDL140C	RPO21	RNA polymerase II largest subunit B220, part of central core; phosphorylation of C-terminal heptapeptide repeat domain regulates association with transcription and splicing factors; similar to bacterial beta-prime	4	DNA-directed RNA polymerase II complex	-0.0267166	0.0441877	0.0279326	0.111008	-0.0740705	0.00963975	0.0957739	-0.0264172	-0.131402	-0.0068619	0.0487195	0.000651	0.183409	-0.0119635	-0.013703
YDL141W	BPL1	Biotin:apoprotein ligase, covalently modifies proteins with the addition of biotin, required for acetyl-CoA carboxylase (Acc1p) holoenzyme formation	4		0.174293	0.109218	0.110196	0.231627	0.191879	0.0122282	0.102999	0.183681	0.145582	0.0781664	0.206075	-0.081943	0.32718	0.247666	0.031494
YDL143W	CCT4	Subunit of the cytosolic chaperonin Cct ring complex, related to Tcp1p, required for the assembly of actin and tubulins in vivo	4	chaperonin-containing T-complex	-0.0202194	0.0482862	0.133413	0.0841458	0.0260318	0.0248486	0.055579	0.172035	0.0276754	-0.0168425	-0.0222815	-0.163471	0.184652	-0.321983	-0.0597545
YDL144C	YDL144C	Putative protein of unknown function; green fluorescent protein (GFP)-fusion protein localizes to the cytoplasm and nucleus; YDL144C is not an essential gene; protein abundance increases in response to DNA replication stress	4		0.0019942	-0.0148128	0.19434	-0.388843	0.0731316	-0.00305645	0.0110976	-0.0744639	0.195553	-0.291554	-0.0093925	0.235487	0.252449	0.340313	0.26114
YDL145C	COP1	Alpha subunit of COPI vesicle coatomer complex, which surrounds transport vesicles in the early secretory pathway	4	COPI	-0.0033659	-0.0169099	0.118329	-0.068511	-0.0495008	0.0279789	0.0258329	0.01923	-0.117289	-0.151369	-0.0610675	-0.057267	0.0976361	-0.0750225	-0.0988824
YDL147W	RPN5	Subunit of the COP9 signalosome (CSN) and non-ATPase regulatory subunit of the 26S proteasome lid, similar to mammalian p55 subunit and to another S. cerevisiae regulatory subunit, Rpn7p; Rpn5p is an essential protein	4	19/22S regulator	-0.054465	-0.0051296	0.115505	0.303193	0.111629	-0.0818637	0.0922342	0.146747	0.109058	0.20064	-0.0970045	0.028378	0.234559	0.255172	0.056477
YDL148C	NOP14	Nucleolar protein, forms a complex with Noc4p that mediates maturation and nuclear export of 40S ribosomal subunits; also present in the small subunit processome complex, which is required for processing of pre-18S rRNA	4	Noc4p/Nop14p complex	-0.0187942	-0.0839869	-0.00030433	-0.154297	0.177116	-0.00785655	-0.11226	0.0135124	-0.0782202	0.0623743	0.0317235	0.075258	0.160358	-0.261498	0.041465
YDL149W	ATG9	Transmembrane protein involved in forming Cvt and autophagic vesicles; cycles between the phagophore assembly site (PAS) and other cytosolic punctate structures, not found in autophagosomes; may be involved in membrane delivery to the PAS	4		-0.0278807	0.0279635	-0.370972	0.0428938	0.24692	-0.0236039	0.263962	0.192528	0.157979	0.10264	-0.356654	-0.615241	-1.38786	1.24417	-0.837826
YDL150W	RPC53	RNA polymerase III subunit C53	4	DNA-directed RNA polymerase III complex	-0.0554013	-0.0049042	-0.0451587	0.0412868	0.103075	0.0158744	0.060024	-0.191336	0.0109207	0.22043	0.0175435	-0.077132	0.0360689	-0.236965	0.050784
YDL153C	SAS10	Essential subunit of U3-containing Small Subunit (SSU) processome complex involved in production of 18S rRNA and assembly of small ribosomal subunit; disrupts silencing when overproduced; mutant has increased aneuploidy tolerance	4		0.0009034	-0.109938	-0.260897	0.102764	0.132099	-0.013485	-0.0665472	-0.0912228	-0.0449264	0.118976	-0.0390305	0.029191	0.140446	-0.418685	-0.110686
YDL156W	YDL156W	DNA-binding protein with preference for UV-damaged DNA; protein sequence contains three WD domains (WD-40 repeat); green fluorescent protein (GFP)-fusion protein localizes to the cytoplasm and nucleus; potential regulatory target of Mbp1p, which binds to the promoter region; co-localizes with Hos2p in nuclear foci in response to DNA damage by MMS	4		-0.11628	0.0465485	-0.101082	0.0877948	-0.273605	-0.00681195	-0.0606445	-0.548941	-0.143257	-0.149912	-0.0841015	-0.160112	-0.419059	0.133553	-0.035144
YDL157C	YDL157C	Putative protein of unknown function; the authentic, non-tagged protein is detected in highly purified mitochondria in high-throughput studies	4		-0.0450084	-0.341941	0.0386106	-0.511043	-0.258126	0.2652	-0.133187	0.573445	0.0958485	-0.214135	-0.303331	-0.12335	-0.618762	0.597031	-1.16774
YDL159W	STE7	Signal transducing MAP kinase kinase involved in pheromone response, where it phosphorylates Fus3p, and in the pseudohyphal/invasive growth pathway, through phosphorylation of Kss1p; phosphorylated by Ste11p, degraded by ubiquitin pathway	4	STE5-MAPK complex	0.3684	0.20614	0.269796	0.417228	0.468141	-0.0826977	-0.443212	-0.177803	-0.00616485	-0.325011	-0.0641115	-0.045744	-0.196163	-0.162673	-0.126701
YDL160C	DHH1	Cytoplasmic DExD/H-box helicase, stimulates mRNA decapping; coordinates distinct steps in mRNA function and decay, interacts with both the decapping and deadenylase complexes, may have a role in mRNA export and translation; C-terminus of Dhh1p interacts with Ngr1p and promotes POR1, but not EDC1 mRNA decay	4		-0.027097	0.0721319	-0.0100858	-0.0585945	0.0157663	0.0180087	0.0813888	-0.11737	-0.151232	-0.0646937	0.12472	0.104659	0.0999017	-0.0774235	-0.006783
YDL160C-A	YDL160C-A	Component of the heterotetrameric MHF histone-fold complex; in humans the MMF complex interacts with both DNA and Mph1p ortholog FANCM to stabilize and remodel blocked replication forks and repair damaged DNA; mhf2 srs2 double mutants are MMS hypersensitive; orthologous to human centromere constitutive-associated network (CCAN) subunit CENP-X, also known as MHF2	4		-0.133094	0.186225	-0.170703	0.154454	-0.164635	-0.0776616	0.0241497	-0.407258	0.269649	-0.052006
YDL161W	ENT1	Epsin-like protein involved in endocytosis and actin patch assembly and functionally redundant with Ent2p; binds clathrin via a clathrin-binding domain motif at C-terminus	4		0.058498	-0.0028655	0.191744	0.365528	-0.301989	0.188361	-0.0331234	-0.0741879	-0.188132	0.191318	-0.0142095	0.181876	0.136171	0.117094	-0.258682
YDL164C	CDC9	DNA ligase found in the nucleus and mitochondria, an essential enzyme that joins Okazaki fragments during DNA replication; also acts in nucleotide excision repair, base excision repair, and recombination	4		0.0045963	0.130179	0.0497022	0.177238	-0.0246278	-0.0113309	-0.0385415	0.170283	0.211192	0.112768	0.0679812	-0.179817	-0.157933	0.139344	0.019388
YDL165W	CDC36	Component of the CCR4-NOT complex, which has multiple roles in regulating mRNA levels including regulation of transcription and destabilizing mRNAs by deadenylation; basal transcription factor	4	CCR4-NOT core complex	0.011742	-0.122023	-0.16471	0.448701	-0.287365	-0.116569	-0.254395	-0.303489	0.0775281	-0.0580972	0.0550155	-0.550325	-0.216385	0.133623	-0.19716
YDL166C	FAP7	Essential NTPase required for small ribosome subunit synthesis, mediates processing of the 20S pre-rRNA at site D in the cytoplasm but associates only transiently with 43S preribosomes via Rps14p, may be the endonuclease for site D	4		-0.100126	-0.0361507	0.0133863	0.033118	-0.0331904	-0.00391655	0.405581	0.0838797	-0.309812	0.267608	-0.0213335	0.316013	0.272267	0.301989	0.423598
YDL167C	NRP1	Putative RNA binding protein of unknown function; localizes to stress granules induced by glucose deprivation; predicted to be involved in ribosome biogenesis	4		0.134487	-0.0238649	-0.136372	-0.0358643	0.29381	0.0305154	0.174071	-0.0151648	-0.0478992	-0.106403	-0.0109115	-0.145749	0.0727001	-0.337383	-0.237941
YDL168W	SFA1	Bifunctional alcohol dehydrogenase and formaldehyde dehydrogenase; formaldehyde dehydrogenase activity is glutathione-dependent; functions in formaldehyde detoxification and formation of long chain and complex alcohols, regulated by Hog1p-Sko1p; protein abundance increases in response to DNA replication stress	4		-0.0116699	-0.0859736	0.04772	-0.386684	0.184286	0.0381981	-0.109428	0.0779082	-0.0643409	0.203347	-0.0732965	0.31209	-0.128049	-0.413101	-0.177372
YDL171C	GLT1	NAD(+)-dependent glutamate synthase (GOGAT), synthesizes glutamate from glutamine and alpha-ketoglutarate; with Gln1p, forms the secondary pathway for glutamate biosynthesis from ammonia; expression regulated by nitrogen source	4		0.0099077	-0.0615528	-1.01279	-0.105655	-0.163506	-0.046056	-0.278718	-0.233931	-0.182822	0.36992	0.0025005	-0.493968	-0.440787	-0.600158	-1.09569
YDL173W	YDL173W	Putative protein of unknown function; hyperphosphorylated upon rapamycin treatment in a Tap42p-dependent manner; green fluorescent protein (GFP)-fusion protein localizes to the cytoplasm; PAR32 is not an essential gene	4		-0.0868794	-0.100068	0.263163	0.377767	-0.0249656	-0.0269914	0.108028	0.0873216	0.1626	-0.0947103	0.0787182	0.199706	0.152599	0.218116	0.30296
YDL174C	DLD1	D-lactate dehydrogenase, oxidizes D-lactate to pyruvate, transcription is heme-dependent, repressed by glucose, and derepressed in ethanol or lactate; located in the mitochondrial inner membrane	4		0.0002065	-0.253802	0.221965	-0.0761512	-0.302385	-0.00198825	-0.0313552	-0.278801	-0.451731	-1.07652	-0.0096405	0.044633	-0.351032	0.0477705	0.201991
YDL175C	AIR2	RNA-binding subunit of the TRAMP nuclear RNA surveillance complex; involved in nuclear RNA processing and degradation; involved in TRAMP complex assembly as a bridge between Mtr4p and Trf4p; stimulates the poly(A) polymerase activity of Pap2p in vitro; functionally redundant with Air1p; has 5 zinc knuckle motifs	4	TRAMP complex (Air2p)	0.308916	0.0197206	0.0435528	0.273438	0.146096	-0.134282	-0.354563	-0.201656	0.0640095	-0.0985013	0.0285075	-0.164125	-0.138677	0.171985	-0.139589
YDL177C	YDL177C	Putative protein of unknown function; similar to the mouse IMPACT gene; YDL177C is not an essential gene	4		-0.0293595	0.02996	-0.0918573	-0.29953	-0.0550411	-0.00648305	-0.0838562	-0.304154	0.338982	0.0753113	-0.0556695	-0.375422	-0.24621	0.0104835	-0.413762
YDL178W	DLD2	D-lactate dehydrogenase, located in the mitochondrial matrix	4		0.0164541	-0.166478	-0.285049	0.0261082	-0.286431	-0.0402283	-0.112141	-0.185326	0.192028	-0.553354	0.0354095	-0.000391	-0.207669	0.0431255	0.178369
YDL181W	INH1	Protein that inhibits ATP hydrolysis by the F1F0-ATP synthase; inhibitory function is enhanced by stabilizing proteins Stf1p and Stf2p; has similarity to Stf1p; has a calmodulin-binding motif and binds calmodulin in vitro	4	mitochondrial ATPase inhibitor complex, F0/F1 ATP synthase (complex V)	-0.0222199	0.0042344	0.0781722	-0.357548	-0.472704	-0.027883	-0.0376954	-0.144613	0.0855819	-2.53271	-0.0764085	0.504699	-1.27145	0.554957	-0.364805
YDL182W	LYS20	Homocitrate synthase isozyme; catalyzes the condensation of acetyl-CoA and alpha-ketoglutarate to form homocitrate, which is the first step in the lysine biosynthesis pathway; LYS20 has a paralog, LYS21, that arose from the whole genome duplication	4		-0.0550947	0.906553	-0.439695	-0.0319699	0.969896	0.119329	0.929761	1.01653	0.495242	0.713976	-0.0344265	0.54931	0.472862	-0.530718	0.534415
YDL183C	YDL183C	Mitochondrial inner-membrane protein thought to be involved in the formation of an active mitochondrial K+/H+ exchanger (KHE) system; non-essential gene	4		-0.0556405	0.183654	-0.00243944	-0.400701	0.0271163						-0.0432555	0.603417	-0.124248	0.839825	-0.0916423
YDL185W	TFP1	Subunit A of the eight-subunit V1 peripheral membrane domain of the vacuolar H+-ATPase; protein precursor undergoes self-catalyzed splicing to yield the extein Tfp1p and the intein Vde (PI-SceI), which is a site-specific endonuclease	4	H+-transporting ATPase, vacuolar, H+-transporting ATPase, Golgi	-0.0118202	-0.0461197	-0.2752	-0.112131	-0.0953511	-0.0441047	-0.0869867	-0.164081	-0.268719	0.230142	-0.0590525	-0.217442	-0.0270563	-0.214954	-0.22049
YDL188C	PPH22	Catalytic subunit of protein phosphatase 2A (PP2A); functionally redundant with Pph21p; methylated at C terminus; forms alternate complexes with several regulatory subunits; involved in signal transduction and regulation of mitosis; protein abundance increases in response to DNA replication stress	4		0.0490278	-0.038565	-0.206273	0.301395	0.251278						0.019081	-0.0131145	0.0077456	-0.089837	-0.302831
YDL189W	RBS1	Protein of unknown function, identified as a high copy suppressor of psk1 psk2 mutations that confer temperature-sensitivity for galactose utilization; proposed to bind single-stranded nucleic acids via its R3H domain	4		0.188487	0.164845	0.19837	0.450905	0.350494	-0.106729	-0.256575	0.00623954	-0.427592	-0.037826	0.111885	-0.18385	0.0538847	-0.0888855	-0.031083
YDL190C	UFD2	Ubiquitin chain assembly factor (E4) that cooperates with a ubiquitin-activating enzyme (E1), a ubiquitin-conjugating enzyme (E2), and a ubiquitin protein ligase (E3) to conjugate ubiquitin to substrates; also functions as an E3	4		0.0170506	-0.0714346	0.126297	0.105821	0.044449	0.124777	0.0812755	0.223582	-0.144748	0.0218049	0.0927591	0.087109	0.368936	0.330587	0.007577
YDL191W	RPL35A	Ribosomal 60S subunit protein L35A; homologous to mammalian ribosomal protein L35 and bacterial L29; RPL35A has a paralog, RPL35B, that arose from the whole genome duplication	4	cytoplasmic ribosomal large subunit	-0.0216602	-0.197859	-0.290435	-0.341607	-0.289874	-0.0960243	-0.151397	-0.292643	-0.0902338	-0.259759	-0.006283	-0.536714	-0.378961	-0.723214	-0.492687
YDL192W	ARF1	ADP-ribosylation factor, GTPase of the Ras superfamily involved in regulation of coated vesicle formation in intracellular trafficking within the Golgi; functionally interchangeable with Arf2p	4	Chs5p/Arf-1binding proteins (ChAPs)	0.0137646	0.483916	0.388386	0.900808	0.259421	0.0027729	0.374121	0.275141	-0.583889	-0.199277	0.033732	0.214905	0.194174	-0.390191	-0.013358
YDL193W	NUS1	Putative prenyltransferase, required for cell viability; proposed to be involved in protein trafficking because tet-repressible mutant shows accumulation of hypoglycosylated forms of CPY	4		-0.0038083	0.0548009	0.442989	0	0.389039	0.337591	-0.0210867	0.515711	0.162436	0.39892	-0.141172	-0.031917	-0.066546	-0.0975915	0.007843
YDL195W	SEC31	Component of the Sec13p-Sec31p complex of the COPII vesicle coat, required for vesicle formation in ER to Golgi transport; mutant has increased aneuploidy tolerance	4	COPII	-0.0212526	-0.0076997	0.0508376	-0.0905548	-0.0926438	0.0105519	-0.0801717	-0.0792096	-0.288282	-0.244449	-0.0590605	-0.073955	-0.0864291	-0.255518	-0.157063
YDL198C	GGC1	Mitochondrial GTP/GDP transporter, essential for mitochondrial genome maintenance; has a role in mitochondrial iron transport; member of the mitochondrial carrier family	4		0.0549788	-0.56926	-0.691853	-0.622526	-0.821569	-0.123299	-0.746519	-1.23066	-0.222637	-0.325611	-0.0114045	-0.682819	-0.107639	-1.53636	-0.650844
YDL201W	TRM8	Noncatalytic subunit of a tRNA methyltransferase complex; Trm8p and Trm82p comprise an enzyme that catalyzes a methyl-transfer from S-adenosyl-l-methionine to the N(7) atom of guanine at position 46 in tRNA; Trm8 lacks catalytic activity if not bound to Trm82p	4	tRNA Methyltransferase Complex	0.0071554	-0.0979843	-0.0235207	-0.115921	-0.0546025	0.0747705	0.147181	-0.0464353	-0.332944	0.1235	0.0541935	0.083402	-0.0839671	-0.314033	0.096691
YDL202W	MRPL11	Mitochondrial ribosomal protein of the large subunit	4	mitochondrial ribosomal large subunit	-0.002968	-0.024012	0.0984456	-0.0295274	-0.112153	-0.0369211	-0.0482053	-0.133276	0.108257	-0.69763	0.0788924	0.414591	-0.0672162	0.211725	-0.10992
YDL203C	ACK1	Protein that functions upstream of Pkc1p in the cell wall integrity pathway; GFP-fusion protein expression is induced in response to the DNA-damaging agent MMS; non-tagged Ack1p is detected in purified mitochondria	4		0.0199107	0.129981	-0.0376544	0.191982	-0.0992473	-0.0697796	0.0554856	-0.0599082	-0.137584	-0.104377	0.124492	-0.085601	0.202336	0.0741995	-0.0864116
YDL204W	RTN2	Reticulon protein that stabilizes membrane curvature; interacts with Rtn1p, Yop1p, and Sey1p to maintain tubular ER morphology; involved in nuclear pore assembly; interacts with exocyst subunit Sec6p, with Yip3p, and with Sbh1p; similar to and much less abundant than Rtn1p; rtn1 rtn2 yop1 triple mutant lacks tubular ER; member of the RTNLA (reticulon-like A) subfamily; protein abundance increases…	4		0.117795	0.354992	0.815598	-1.70438	1.36751						0.0391565	1.28472	1.06318	2.12937	-1.87668
YDL205C	HEM3	Porphobilinogen deaminase, catalyzes the conversion of 4-porphobilinogen to hydroxymethylbilane, the third step in heme biosynthesis; localizes to the cytoplasm and nucleus; expression is regulated by Hap2p-Hap3p, but not by levels of heme	4		-0.0223168	0.119482	0.128236	-0.105333	-0.177671	-0.0500927	0.0712684	-0.312755	0.070084	-0.254346	0.0918149	0.002885	-0.271616	-0.253111	-0.353777
YDL207W	GLE1	Cytoplasmic nucleoporin required for polyadenylated RNA export; not essential for protein import; contains a nuclear export signal; when bound to inositol hexakisphosphate (IP6), functions as an activator for the Dbp5p ATPase activity at the nuclear pore complex during mRNA export	4	Nup82 nuclear pore subcomplex	-0.159144	0.396891	0.134276	0.524112	0.197282						0.0139445	0.102627	0.170389	0.111552	0.055813
YDL208W	NHP2	Nuclear protein related to mammalian high mobility group (HMG) proteins, essential for function of H/ACA-type snoRNPs, which are involved in 18S rRNA processing	4		0.0171663	-0.185732	-0.123254	-0.369845	-0.255251	-0.125146	-0.116836	-0.361372	-0.160679	-0.32613	-0.125219	-0.152161	-0.0729321	-0.585407	-0.131882
YDL209C	CWC2	Member of the NineTeen Complex (NTC) that contains Prp19p and stabilizes U6 snRNA in catalytic forms of the spliceosome containing U2, U5, and U6 snRNAs; binds directly to U6 snRNA; similar to S. pombe Cwf2	4		0.0851966	-0.146388	0.192179	-0.0118756	0.263095	-0.178651	-0.165944	-0.251577	-0.156547	-0.232929	-0.0028335	0.043098	0.149741	0.0205115	-0.010553
YDL212W	SHR3	Endoplasmic reticulum packaging chaperone, required for incorporation of amino acid permeases into COPII coated vesicles for transport to the cell surface	4		0.0155681	-0.0333272	0.135046	0.810821	0.225729	0.0303364	0.378928	0.299709	-0.142833	0.3082	0.0427305	0.32408	0.14961	0.0896925	0.388098
YDL213C	NOP6	rRNA-binding protein required for 40S ribosomal subunit biogenesis; contains an RNA recognition motif (RRM); hydrophilin essential to overcome the stress of the desiccation-rehydration process; NOP6 may be a fungal-specific gene as no homologs have been yet identified in higher eukaryotes	4		-0.12462	-0.199668	0.13455	-0.0302874	0.309451	-0.0204894	0.0824771	0.0391544	-0.17501	0.253198	0.0141715	0.049519	0.185189	0.148337	0.184988
YDL215C	GDH2	NAD(+)-dependent glutamate dehydrogenase, degrades glutamate to ammonia and alpha-ketoglutarate; expression sensitive to nitrogen catabolite repression and intracellular ammonia levels	4		-0.0100108	0.20794	0.131601	0.38389	0.98037	0.0440558	0.546904	0.825862	0.427192	-0.0536257	-0.0033155	0.490782	0.359663	1.50975	0.173023
YDL217C	TIM22	Essential core component of the mitochondrial TIM22 complex involved in insertion of polytopic proteins into the inner membrane; forms the channel through which proteins are imported	4	mitochondrial inner membrane protein insertion complex	0.0147809	0.10371	0.15437	0.142726	-0.0786503	-0.30546	0.261337	0.0645102	-0.290393	-0.0922793
YDL219W	DTD1	D-Tyr-tRNA(Tyr) deacylase, functions in protein translation, may affect nonsense suppression via alteration of the protein synthesis machinery; ubiquitous among eukaryotes	4		-0.0990994	-0.0748834	0.00641485	0.368285	0.118122	0.12872	-0.173215	0.284975	0.201274	0.0249059	0.142799	-0.129315	0.152374	0.185911	0.371097
YDL220C	CDC13	Single stranded DNA-binding protein found at TG1-3 telomere G-tails; regulates telomere replication through recruitment of specific sub-complexes, but the essential function is telomere capping; autophagy and proteasome are involved in Cdc13p degradation	4		0.0686102	0.250838	0.10526	0.735542	0.13651						-0.30213	-0.046398	-0.341942	-0.393374	-0.163565
YDL223C	HBT1	Substrate of the Hub1p ubiquitin-like protein that localizes to the shmoo tip (mating projection); mutants are defective for mating projection formation, thereby implicating Hbt1p in polarized cell morphogenesis	4		-0.0338035	0.232805	0.0948536	-1.13089	0.944696	-0.0826206	1.37511	0.527491	0.181314	0.516513	-0.223416	0.451938	1.12661	1.38536	-0.841977
YDL224C	WHI4	Putative RNA binding protein and partially redundant Whi3p homolog that regulates the cell size requirement for passage through Start and commitment to cell division	4		0.0488722	0.0471479	-0.0930741	-0.0642966	0.0270896	0.101231	-0.0365991	-0.258131	-0.0231737	-0.226852	0.0451295	-0.043019	-0.102579	-0.23401	-0.0924858
YDL225W	SHS1	Component of the septin ring that is required for cytokinesis; septins are GTP-binding proteins that assemble into rod-like hetero-oligomers that can associate with other rods to form filaments; septin rings at the mother-bud neck act as scaffolds for recruiting cell division factors and as barriers to prevent diffusion of specific proteins; undergoes sumoylation and phosphorylation during mitosi…	4		0.0102055	-0.0371788	-0.0295535	0.0383498	-0.110132	0.00275115	-0.164165	-0.371183	-0.314795	-0.0320693	-0.0279705	-0.141281	0.0202924	-0.130905	-0.043985
YDL226C	GCS1	ADP-ribosylation factor GTPase activating protein (ARF GAP), involved in ER-Golgi transport; shares functional similarity with Glo3p	4		0.101861	-0.177853	0.180465	0.121693	-0.225755	0.0101208	-0.113418	-0.15043	-0.336214	-0.232201	0.0191765	-0.143363	-0.178402	-0.485185	-0.192256
YDL229W	SSB1	Cytoplasmic ATPase that is a ribosome-associated molecular chaperone, functions with J-protein partner Zuo1p; may be involved in folding of newly-made polypeptide chains; member of the HSP70 family; interacts with phosphatase subunit Reg1p	4		0.0437953	-0.182536	-0.243884	-0.460701	-0.299001	0.0231155	-0.181397	-0.36805	-0.175792	-0.207393	0.0963933	-0.454075	-0.350276	-1.06115	-0.253427
YDL230W	PTP1	Phosphotyrosine-specific protein phosphatase that dephosphorylates a broad range of substrates in vivo, including Fpr3p; localized to the cytoplasm and the mitochondria; proposed to be a negative regulator of filamentation	4		0.0929762	0.114989	0.358084	0.387806	0.375279	0.180658	0.142724	0.446639	0.207961	0.611867	0.285064	0.158518	0.456164	0.526895	0.197561
YDL233W	YDL233W	Regulator of filamentous growth; interacts with FLO11 promoter and regulates FLO11 expression; binds to transcription factors Flo8p and Mss11p; green fluorescent protein (GFP)-fusion protein localizes to the nucleus; YDL233W is not an essential gene	4												0.0079555	-0.463495	0.491258	0.363492	0.303814
YDL234C	GYP7	GTPase-activating protein for yeast Rab family members including: Ypt7p (most effective), Ypt1p, Ypt31p, and Ypt32p (in vitro); involved in vesicle mediated protein trafficking	4		0.167239	0.214407	0.538199	0.263342	0.469188	0.0742642	0.419696	0.445374	0.43087	0.79613	0.0780705	0.241888	1.1253	1.28033	0.213195
YDL235C	YPD1	Phosphorelay intermediate protein, phosphorylated by the plasma membrane sensor Sln1p in response to osmotic stress and then in turn phosphorylates the response regulators Ssk1p in the cytosol and Skn7p in the nucleus	4		0.0504252	1.0762	1.17291	0.403014	1.13	0.0342971	0.956263	0.685593	1.07371	1.87851	-0.0611825	-0.202984	0.789407	1.92459	0.655566
YDL236W	PHO13	Alkaline phosphatase specific for p-nitrophenyl phosphate; also has protein phosphatase activity	4		-0.033159	0.0169132	-0.283338	0.157211	-0.0491703	0.00871855	-0.0704321	-0.0307833	0.0334576	0.042315	-0.0571595	-0.083035	-0.0537793	-0.0495505	0.129302
YDL237W	AIM6	Putative protein of unknown function, required for respiratory growth; YDL237W is not an essential gene	4							0.103811	0.361228	0.448476	0.0301039	-0.411567
YDL240W	LRG1	Putative GTPase-activating protein (GAP) involved in the Pkc1p-mediated signaling pathway that controls cell wall integrity; appears to specifically regulate 1,3-beta-glucan synthesis	4		0.115685	-0.005071	-0.276262	-0.410251	-0.0149877						-0.303709	-0.173261	-0.296749	-0.20606	-0.209717
YDR001C	NTH1	Neutral trehalase, degrades trehalose; required for thermotolerance and may mediate resistance to other cellular stresses; may be phosphorylated by Cdc28p	4		0.0772817	0.179554	0.184217	-0.0330355	0.504435	0.0177438	0.285916	0.400495	0.183941	0.415905	0.0136535	0.193968	0.254615	0.755235	-0.0944991
YDR002W	YRB1	Ran GTPase binding protein; involved in nuclear protein import and RNA export, ubiquitin-mediated protein degradation during the cell cycle; shuttles between the nucleus and cytoplasm; is essential; homolog of human RanBP1	4		0.0198253	-0.202673	-0.0813206	-0.215025	0.0305054	0.0199182	0.0803257	-0.0843233	-0.113261	0.144807	-0.102059	-0.205329	-0.338291	-0.478133	-0.009567
YDR005C	MAF1	Highly conserved negative regulator of RNA polymerase III; binds to the N-terminal domain of the Rpc160p subunit of Pol III to prevent closed-complex formation; localization and activity are regulated by phosphorylation, mediated by TORC1, protein kinase A, and Sch9p; localizes to cytoplasm during vegetative growth and translocates to the nucleus and nucleolus under stress conditions	4		0.103982	0.242919	-0.12069	0.385847	0.0443623	0.17365	-0.146141	-0.610408	-0.227538	-0.050081	0.0778259	0.016012	-0.305899	0.104986	-0.286864
YDR006C	SOK1	Protein whose overexpression suppresses the growth defect of mutants lacking protein kinase A activity; involved in cAMP-mediated signaling; localized to the nucleus; similar to the mouse testis-specific protein PBS13	4		-0.0586318	-0.0204354	0.210464	0.0084401	-0.0392337	0.0550472	-0.0290386	0.298002	0.00676195	-0.405368	0.0785165	0.414283	-0.0461909	0.608246	0.159059
YDR011W	SNQ2	Plasma membrane ATP-binding cassette (ABC) transporter, multidrug transporter involved in multidrug resistance and resistance to singlet oxygen species	4		0.0272211	-0.235458	-0.0935158	-0.122274	0.0558623	0.105078	-0.0800306	0.418549	0.0610352	-0.0839873	-0.0609925	0.273018	0.573296	0.0460315	-0.339681
YDR012W	RPL4B	Ribosomal 60S subunit protein L4B; homologous to mammalian ribosomal protein L4 and bacterial L4; RPL4B has a paralog, RPL4A, that arose from the whole genome duplication	4	cytoplasmic ribosomal large subunit	-0.0906504	-0.0905824	-1.11525	-0.30104	-0.260046	0.0197482	-0.0668465	-0.122505	-0.111048	-0.268615	-0.0731305	-0.385148	-0.240125	-0.760657	-0.153331
YDR013W	PSF1	Subunit of the GINS complex (Sld5p, Psf1p, Psf2p, Psf3p), which is localized to DNA replication origins and implicated in assembly of the DNA replication machinery	4	GINS complex	0.0753805	-0.0558874	0.10223	0.141223	-0.0684326	0.0898364	-0.0199537	0.0115422	-0.028097	0.120142	0.0278305	-0.048176	-0.222191	0.0641305	0.150115
YDR016C	DAD1	Essential subunit of the Dam1 complex (aka DASH complex), couples kinetochores to the force produced by MT depolymerization thereby aiding in chromosome segregation; is transferred to the kinetochore prior to mitosis	4	DASH complex											-0.333841	-0.537984	-0.437563	-0.206495	-0.224084
YDR017C	KCS1	Inositol hexakisphosphate (IP6) and inositol heptakisphosphate (IP7) kinase; generation of high energy inositol pyrophosphates by Kcs1p is required for many processes such as vacuolar biogenesis, stress response and telomere maintenance	4		-0.0503153	0.0114027	0.00606635	0.0526698	0.0388249	0.0701365	-0.194848	0.0110905	-0.00379195	-0.170687	0.0417795	-0.00305	-0.119192	0.0236515	0.085907
YDR019C	GCV1	T subunit of the mitochondrial glycine decarboxylase complex, required for the catabolism of glycine to 5,10-methylene-THF; expression is regulated by levels of levels of 5,10-methylene-THF in the cytoplasm	4	glycine cleavage complex	0.0111303	-0.300153	-0.390437	0.285299	0.436063	0.0507597	0.205269	-2.11095	1.5426	-0.626573	-0.0238505	-0.342171	0.819371	0.689705	1.1417
YDR020C	DAS2	Putative protein of unknown function; non-essential gene identified in a screen for mutants with increased levels of rDNA transcription; weak similarity with uridine kinases and with phosphoribokinases	4		0.0125879	-0.08415	-0.10843	0.0328619	-0.0477782	0.0475572	0.0477435	-0.0862326	-0.106677	-0.186174	0.095661	-0.11711	-0.062341	-0.308878	0.078914
YDR021W	FAL1	Nucleolar protein required for maturation of 18S rRNA, member of the eIF4A subfamily of DEAD-box ATP-dependent RNA helicases	4		-0.102196	0.0685169	-0.15676	0.583671	0.296523	-0.119316	-0.0755206	-0.227885	-0.0294659	-0.0013346	0.0095515	0.284633	0.0872332	-0.346631	0.108026
YDR022C	CIS1	Autophagy-specific protein required for autophagosome formation; may form a complex with Atg17p and Atg29p that localizes other proteins to the pre-autophagosomal structure; high-copy suppressor of CIK1 deletion	4												0.0260515	-0.2806	0.017763	0.142689	0.346088
YDR023W	SES1	Cytosolic seryl-tRNA synthetase, class II aminoacyl-tRNA synthetase that aminoacylates tRNA(Ser), displays tRNA-dependent amino acid recognition which enhances discrimination of the serine substrate, interacts with peroxin Pex21p	4		-0.0148933	-0.0540654	-0.134936	-0.174256	-0.161217	-0.0539079	-0.0787307	-0.0815853	-0.123056	0.0121066	-0.0860095	-0.182303	-0.154175	-0.422393	-0.16784
YDR025W	RPS11A	Protein component of the small (40S) ribosomal subunit; homologous to mammalian ribosomal protein S11 and bacterial S17; RPS11A has a paralog, RPS11B, that arose from the whole genome duplication	4	cytoplasmic ribosomal small subunit	0.0110884	0.0316383	-0.0557987	-0.0642396	-0.203965	0.017751	0.197191	0.182165	0.0767635	-0.0410594	-0.066941	-0.552243	0.0455224	-0.503145	-0.550363
YDR026C	YDR026C	RNA polymerase I termination factor; binds to rDNA terminator element, required for efficient Pol I termination; required for rDNA silencing at NTS1; facilities association of Sir2p with NTS1, contributes to rDNA stability and cell longevity; interacts physically with Fob1p and RENT subunits, Sir2p and Net1p; may interact with ribosomes, based on co-purification experiments; Myb-like DNA-binding …	4							-0.171999	0.0262052	-0.186948	-0.0495436	-0.0308091	-0.246058	-0.300505	-0.834367	-0.32741	-0.318521
YDR027C	VPS54	Component of the GARP (Golgi-associated retrograde protein) complex, Vps51p-Vps52p-Vps53p-Vps54p, which is required for the recycling of proteins from endosomes to the late Golgi; potentially phosphorylated by Cdc28p	4	GARP complex	-0.0663443	0.0812929	0.163488	0.165264	0.133675	-0.0400515	-0.0104917	-0.0261499	0.105645	-0.0346013	0.0654065	0.052857	0.192535	0.0306515	-0.026543
YDR028C	REG1	Regulatory subunit of type 1 protein phosphatase Glc7p; involved in negative regulation of glucose-repressible genes; involved in regulation of the nucleocytoplasmic shuttling of Hxk2p	4	Reg1p/Glc7p complex	0.050867	0.0041058	-0.0247293	0.0584008	0.0794318	-0.104307	-0.0713739	-0.131549	0.0386873	-0.0355374	0.0019475	-0.098642	0.166281	0.245524	-0.188019
YDR031W	MIC14	Mitochondrial intermembrane space protein of unknown function; required for normal oxygen consumption; contains twin cysteine-x9-cysteine motifs; protein abundance increases in response to DNA replication stress	4		-0.0267015	0.670224	0.905537	-0.170605	0.515617	-0.307959	0.508321	0.363896	0.84436	-0.140884	0.161438	0.884699	0.32396	1.7247	0.481821
YDR032C	PST2	Protein with similarity to a family of flavodoxin-like proteins; induced by oxidative stress in a Yap1p dependent manner; the authentic, non-tagged protein is detected in highly purified mitochondria in high-throughput studies; protein abundance increases in response to DNA replication stress	4		-0.0684164	0.033741	0.307311	0.18428	0.273857	-0.0734737	0.145547	0.2499	0.234269	0.337416	-0.0438635	0.103551	0.314902	0.875976	-0.176922
YDR033W	MRH1	Protein that localizes primarily to the plasma membrane, also found at the nuclear envelope; the authentic, non-tagged protein is detected in mitochondria in a phosphorylated state; has similarity to Hsp30p and Yro2p	4		-0.0320601	-0.153282	-0.107844	-0.500889	-0.28562	-0.107814	-0.189542	-0.368667	-0.760697	-0.931079	0.0069865	0.757907	-0.857593	-0.267989	0.377153
YDR034C	LYS14	Transcriptional activator involved in regulation of genes of the lysine biosynthesis pathway; requires 2-aminoadipate semialdehyde as co-inducer	4		0.248505	-0.0339988	0.24979	-0.0551599	-0.143754	0.0259405	-0.174106	-0.142622	-0.374816	-0.309464	0.0752922	-0.290369	-0.0882591	-0.359533	-0.108573
YDR035W	ARO3	3-deoxy-D-arabino-heptulosonate-7-phosphate (DAHP) synthase, catalyzes the first step in aromatic amino acid biosynthesis and is feedback-inhibited by phenylalanine or high concentration of tyrosine or tryptophan	4		0.0457866	-0.146562	-0.296273	-0.0529523	-0.240344	0.0189738	-0.269258	-0.289595	0.0716415	0.314046	-0.0507245	-0.776993	0.144922	-0.742927	-0.470169
YDR036C	EHD3	3-hydroxyisobutyryl-CoA hydrolase, member of a family of enoyl-CoA hydratase/isomerases; non-tagged protein is detected in highly purified mitochondria in high-throughput studies; phosphorylated; mutation affects fluid-phase endocytosis	4		-0.0440341	0.131306	-0.0219001	-0.0369384	0.0967097	-0.0459796	-0.0233863	-0.0403212	0.197612	-0.506194	-0.0384295	-0.344332	-0.10935	0.116559	-0.0997065
YDR037W	KRS1	Lysyl-tRNA synthetase	4		0.0310051	-0.134066	-0.0667918	-0.336166	0.00981355	0.0126025	-0.140035	0.151467	-0.131154	0.375552	-0.0311855	-0.362911	0.0529811	-0.687957	-0.263512
YDR038C	ENA5	Protein with similarity to P-type ATPase sodium pumps, member of the Na+ efflux ATPase family	4		0.0295142	-0.230091	-0.299222	-0.503096	0.188975	-0.0084755	-0.348945	0.0326104	0.0480517	0.162427	0.0777925	-0.0535295	0.335519	-1.11378	-0.798857
YDR039C	ENA2	P-type ATPase sodium pump, involved in Na+ efflux to allow salt tolerance; likely not involved in Li+ efflux	4		0.0295142	-0.230091	-0.299222	-0.503096	0.188975	-0.0084755	-0.348945	0.0326104	0.0480517	0.162427	0.0777925	-0.0535295	0.335519	-1.11378	-0.798857
YDR040C	ENA1	P-type ATPase sodium pump, involved in Na+ and Li+ efflux to allow salt tolerance	4		0.0851642	-0.258837	-0.364841	-0.611082	0.303825	0.0416988	-0.639312	-0.1688	0.0675511	0.479114	0.212353	-0.373541	0.590488	-1.50624	-1.33807
YDR041W	RSM10	Mitochondrial ribosomal protein of the small subunit, has similarity to E. coli S10 ribosomal protein; essential for viability, unlike most other mitoribosomal proteins	4	mitochondrial ribosomal small subunit	0.146427	-0.0170507	0.18986	-0.159301	-0.0908398	-0.0747146	-0.040701	-0.318453	0.21251	-1.00177	-0.227932	0.298887	-0.378546	0.366759	-0.325262
YDR043C	NRG1	Transcriptional repressor; recruits the Cyc8p-Tup1p complex to promoters; mediates glucose repression and negatively regulates a variety of processes including filamentous growth and alkaline pH response; NRG1 has a paralog, NRG2, that arose from the whole genome duplication	4												-0.0766225	0.245038	0.0091715	0.328969	0.007873
YDR044W	HEM13	Coproporphyrinogen III oxidase, an oxygen requiring enzyme that catalyzes the sixth step in the heme biosynthetic pathway; transcription is repressed by oxygen and heme (via Rox1p and Hap1p)	4		0.0885828	-0.299299	-0.42753	-0.481834	0.196532	-0.0610933	-0.245931	-0.338799	0.640989	0.203653	0.188389	-0.72505	0.191415	-0.10006	-0.622733
YDR045C	RPC11	RNA polymerase III subunit C11; mediates pol III RNA cleavage activity and is important for termination of transcription; homologous to TFIIS	4	DNA-directed RNA polymerase III complex	-0.0018031	-0.0188408	0.012548	0.0050233	0.241421	0.080034	0.050768	-0.275806	-0.111171	0.140532	0.307874	0.104833	0.0035921	-0.321136	-0.189002
YDR047W	HEM12	Uroporphyrinogen decarboxylase, catalyzes the fifth step in the heme biosynthetic pathway; localizes to both the cytoplasm and nucleus; a hem12 mutant has phenotypes similar to patients with porphyria cutanea tarda	4		-0.0103462	-0.0124378	-0.196763	-0.0404459	-0.13989	-0.00393775	-0.184126	-0.151051	-0.439589	-0.38506	0.0204055	0.203072	-0.21173	-0.108538	0.015797
YDR049W	YDR049W	Component of a Cdc48p-complex involved in protein quality control; exhibits cytosolic and ER-membrane localization, with Cdc48p, during normal growth, and contributes to ER-associated degradation (ERAD) of specific substrates at a step after their ubiquitination; forms a mitochondrially-associated complex with Cdc48p and Npl4p under oxidative stress that is required for ubiquitin-mediated mitocho…	4		0.0260688	-0.0918381	-0.0104843	0.0603848	-0.0888947	0.0324939	-0.0291145	0.269272	-0.0878301	0.349892	0.117732	0.135217	0.157097	0.0640585	0.355138
YDR050C	TPI1	Triose phosphate isomerase, abundant glycolytic enzyme; mRNA half-life is regulated by iron availability; transcription is controlled by activators Reb1p, Gcr1p, and Rap1p through binding sites in the 5' non-coding region; inhibition of Tpi1p activity by PEP (phosphoenolpyruvate) stimulates redox metabolism in respiring cells; E104D mutation in human TPI causes a rare autosomal disease	4		0.064373	0.0732399	-0.153333	-0.0808617	-0.135015	0.0474572	0.553446	-0.0229697	-0.254041	-0.551566	-0.0189905	0.194426	-0.196241	-1.48985	-0.921599
YDR052C	DBF4	Regulatory subunit of Cdc7p-Dbf4p kinase complex, required for Cdc7p kinase activity and initiation of DNA replication; phosphorylates the Mcm2-7 family of proteins; cell cycle regulated	4	Cdc7p/Dbf4p complex	0.349353	0.306907	0.315019	0.290322	0.321314	0.0309798	-0.0791001	-0.0353707	0.0105949	0.365333
YDR054C	CDC34	Ubiquitin-conjugating enzyme (E2); catalytic subunit of SCF ubiquitin-protein ligase complex (together with Skp1p, Rbx1p, Cdc53p, and an F-box protein) that regulates cell cycle progression by targeting key substrates for degradation; protein abundance increases in response to DNA replication stress	4	SCF-CDC4 complex	0.0689031	-0.08229	0.246952	-0.0080452	-0.0445709	0.0632638	-0.0505499	-0.238858	-0.0735264	0.079279	0.0580415	-0.317945	-0.124922	0.154325	0.194594
YDR055W	PST1	Cell wall protein that contains a putative GPI-attachment site; secreted by regenerating protoplasts; up-regulated by activation of the cell integrity pathway, as mediated by Rlm1p; upregulated by cell wall damage via disruption of FKS1	4		0.13533	0.0372181	0.203047	-0.18983	-0.121068	0.0376168	0.21075	-0.206385	-0.0150008	-0.0254662	-0.0977545	0.325689	-0.273968	0.784135	0.607656
YDR056C	YDR056C	Putative protein of unknown function; green fluorescent protein (GFP)-fusion protein localizes to the endoplasmic reticulum; YDR056C is not an essential protein	4		0.0939722	0.192866	-1.53802	2.2113	0.0710436	-0.0663536	0.390582	0.557631	-0.181411	0.161466	-0.0441195	0.043311	0.275112	-0.0282815	0.334804
YDR057W	YOS9	ER quality-control lectin; integral subunit of the HRD ligase; binds to glycans with terminal alpha-1,6 linked mannose on misfolded N-glycosylated proteins and participates in targeting proteins to ERAD; member of the OS-9 protein family	4	ubiquitin ligase ERAD-L complex, luminal surveillance complex	0.186354	-0.0919613	0.0140395	-0.0805692	0.276713	-0.202295	-0.0886527	-0.0124613	-0.0177394	0.194454	-0.0191925	0.154487	0.342094	0.397627	0.1413
YDR059C	UBC5	Ubiquitin-conjugating enzyme; mediates selective degradation of short-lived, abnormal, or excess proteins, including histone H3; central component of the cellular stress response; expression is heat inducible; protein abundance increases in response to DNA replication stress	4		0.245429	0.508408	0.600979	-0.0951082	0.376363						0.349226	0.200818	0.31593	0.779486	0.183191
YDR060W	MAK21	Constituent of 66S pre-ribosomal particles, required for large (60S) ribosomal subunit biogenesis; involved in nuclear export of pre-ribosomes; required for maintenance of dsRNA virus; homolog of human CAATT-binding protein	4	Noc1p/Noc2p complex	-0.0010142	0.0143966	-0.0129965	-0.0117247	0.0593057	-0.0643846	0.0232228	-0.00740074	-0.147342	-0.0366724	-0.0379615	-0.037379	0.0717416	-0.290924	0.014756
YDR061W	YDR061W	Protein with similarity to ATP-binding cassette (ABC) transporter family members; lacks predicted membrane-spanning regions; transcriptionally activated by Yrm1p along with genes involved in multidrug resistance	4		0.0130512	0.170589	0.0727224	0.430301	-0.00148769	0.0556601	0.0266347	0.0223703	0.200993	-0.202069	0.0134695	0.055966	0.0114967	0.447286	-0.0856056
YDR062W	LCB2	Component of serine palmitoyltransferase, responsible along with Lcb1p for the first committed step in sphingolipid synthesis, which is the condensation of serine with palmitoyl-CoA to form 3-ketosphinganine	4	serine C-palmitoyltransferase complex	0.117332	0.18543	0.0266776	0.450125	0.143813	0.0703199	0.281065	0.222514	0.0481699	0.193581	-0.0259415	0.044021	0.0527876	0.133757	0.024302
YDR063W	AIM7	Protein that interacts with Arp2/3 complex to stimulate actin filament debranching and inhibit actin nucleation; has similarity to Cof1p and also to human glia maturation factor (GMF); null mutant displays elevated mitochondrial genome loss	4		0.1191	0.870283	0.968833	0.608618	0.437197	0.0639723	0.431863	0.0809235	0.235177	0.291985	0.228769	0.323866	0.38345	0.983996	0.57685
YDR064W	RPS13	Protein component of the small (40S) ribosomal subunit; homologous to mammalian ribosomal protein S13 and bacterial S15	4	cytoplasmic ribosomal small subunit	0.0401269	-0.0536738	-0.233013	-0.0784845	-0.308883	0.0102869	0.0455606	-0.279824	-0.318674	-0.207051	0.0116215	-0.433315	-0.194638	-0.532949	-0.280884
YDR067C	OCA6	Cytoplasmic protein required for replication of Brome mosaic virus in S. cerevisiae, which is a model system for studying positive-strand RNA virus replication; null mutation confers sensitivity to tunicamycin and DTT	4	OCA complex	0.0825043	-0.0586018	0.276203	0.232085	0.106269	0.0370755	0.13645	-0.063236	0.508279	0.0726461	0.0716244	0.137463	0.38407	0.223618	0.205922
YDR068W	DOS2	Protein of unknown function, green fluorescent protein (GFP)-fusion protein localizes to the cytoplasm	4		0.0423557	-0.165759	-0.00997859	-0.357616	0.136729	-0.245923	-0.207476	-0.27329	-0.35344	0.13987	-0.0091245	-0.166615	0.181738	0.278055	0.066404
YDR069C	DOA4	Ubiquitin isopeptidase, required for recycling ubiquitin from proteasome-bound ubiquitinated intermediates, acts at the late endosome/prevacuolar compartment to recover ubiquitin from ubiquitinated membrane proteins en route to the vacuole	4							0.0449651	0.161933	0.346053	0.419432	0.33785
YDR070C	FMP16	Putative protein of unknown function; proposed to be involved in responding to conditions of stress; the authentic, non-tagged protein is detected in highly purified mitochondria in high-throughput studies; protein abundance increases in response to DNA replication stress	4		-0.200137	0.0168442	-1.38447	-1.62079	0.509878	-0.199841	0.970382	0.377615	-0.762179	-2.01291	0.190279	-1.26892	-1.26796	-0.899615	-1.08018
YDR071C	PAA1	Polyamine acetyltransferase; acetylates polyamines (e.g. putrescine, spermidine, spermine) and also aralkylamines (e.g. tryptamine, phenylethylamine); may be involved in transcription and/or DNA replication	4		0.0094989	-0.0293012	0.382805	0.313228	-0.268128	-0.134787	-0.0697579	-0.459995	-0.101207	-0.276651	0.0317795	-0.104888	0.0552439	-0.201747	0.047942
YDR074W	TPS2	Phosphatase subunit of the trehalose-6-P synthase/phosphatase complex; involved in synthesis of the storage carbohydrate trehalose; expression is induced by stress conditions and repressed by the Ras-cAMP pathway; protein abundance increases in response to DNA replication stress	4	alpha,alpha-trehalose-phosphate synthase complex (UDP-forming)	0.0559588	0.0377878	0.139466	-0.151677	0.0876501	-0.0182529	0.157492	-0.00175911	-0.131574	-0.37269	-0.0119795	1.18103	-0.189877	0.577934	-0.042242
YDR075W	PPH3	Catalytic subunit of protein phosphatase PP4 complex; active complex is composed of Pph3p and Psy2p, with Psy4p apparently providing additional substrate specificity in some cases; regulates recovery from the DNA damage checkpoint and also the gene conversion- and single-strand annealing-mediated pathways of meiotic double-strand break repair; involved in activation of Gln3p to alleviate nitrogen…	4	histone H2A phosphatase complex	0.0312905	0.0761259	0.0399035	0.187565	-0.00913447	0.330377	0.658064	0.274824	0.0385733	0.248915	-0.0009805	-0.15092	0.0326229	-0.417893	-0.116578
YDR077W	SED1	Major stress-induced structural GPI-cell wall glycoprotein in stationary-phase cells, associates with translating ribosomes, possible role in mitochondrial genome maintenance; ORF contains two distinct variable minisatellites	4							0.116299	0.28539	0.17893	0.324559	1.58914	-0.0440205	0.563278	0.453846	0.785385	-0.126163
YDR079C-A	TFB5	Component of the RNA polymerase II general transcription and DNA repair factor TFIIH; involved in transcription initiation and in nucleotide-excision repair; homolog of Chlamydomonas reinhardtii REX1-S protein involved in DNA repair	4	transcription factor TFIIH complex	0.352455	0.0471011	0.244459	0.138486	0.41587	0.00985895	-0.0353524	0.0656453	0.0456737	0.0651124	-0.146424	-0.381682	-0.143999	-0.184559	0.436063
YDR079W	PET100	Chaperone that specifically facilitates the assembly of cytochrome c oxidase, integral to the mitochondrial inner membrane; interacts with a subcomplex of subunits VII, VIIa, and VIII (Cox7p, Cox9p, and Cox8p) but not with the holoenzyme	4		-0.16622	-0.129154	0.101643	0.198128	-0.248747	0.131735	0.0963162	0.0494047	0.408809	-0.524296	-0.0032215	0.385362	-0.283912	0.32246	-0.244833
YDR080W	VPS41	Vacuolar membrane protein that is a subunit of the homotypic vacuole fusion and vacuole protein sorting (HOPS) complex; essential for membrane docking and fusion at the Golgi-to-endosome and endosome-to-vacuole stages of protein transport	4	HOPS complex	0.168474	-0.261631	0.266128	-0.138423	0.258324	-0.169185	-0.011579	0.0322499	0.203347	0.116535	-0.111627	0.012278	0.198848	0.208101	0.025109
YDR081C	PDC2	Transcription factor for thiamine-regulated genes; required for expression of the two isoforms of pyruvate decarboxylase (PDC1 and PDC5) along with thiamine biosynthetic genes; binds a DNA sequence in the PDC5 promoter; mutant fails to grow on 2% glucose and thus is scored as inviable under standard conditions	4		-0.103542	0.0719269	-0.0724597	0.191009	-0.136446	-0.110536	-0.255838	-0.46785	0.0792537	-0.255619	0.0498815	0.065363	0.12223	0.0181665	0.052329
YDR083W	RRP8	Nucleolar protein involved in rRNA processing, pre-rRNA cleavage at site A2; also involved in telomere maintenance; mutation is synthetically lethal with a gar1 mutation	4		-0.123972	-0.0483223	-0.245542	-0.0606049	-0.148708	0.0345299	-0.000311	0.0690418	-0.0770939	0.0899205	-0.0265625	0.16957	-0.176428	-0.68718	-0.029198
YDR086C	SSS1	Subunit of the Sec61p translocation complex (Sec61p-Sss1p-Sbh1p) that forms a channel for passage of secretory proteins through the endoplasmic reticulum membrane, and of the Ssh1p complex (Ssh1p-Sbh2p-Sss1p); interacts with Ost4p and Wbp1p	4	Ssh1p translocon complex, Sec61p translocon complex	-0.156724	0.389885	0.289681	0.588579	0.106776	-0.0755887	-0.255111	-0.530535	0.123534	0.437606	0.379466	-0.032522	0.119302	-0.295908	0.486806
YDR087C	RRP1	Essential evolutionarily conserved nucleolar protein necessary for biogenesis of 60S ribosomal subunits and processing of pre-rRNAs to mature rRNAs, associated with several distinct 66S pre-ribosomal particles	4		-0.0595106	0.111097	0.107175	-0.0186955	0.146221	-0.0294336	0.218068	0.276643	-0.250781	0.33221	0.0183755	0.115112	0.122148	-0.272768	0.408058
YDR088C	SLU7	RNA splicing factor, required for ATP-independent portion of 2nd catalytic step of spliceosomal RNA splicing; interacts with Prp18p; contains zinc knuckle domain	4		0.0577624	-0.035325	0.0782263	0.0916118	-0.0547412	0.104687	-0.100806	0.154119	0.0360948	-0.19364	0.114738	-0.088908	0.122207	0.160885	0.072391
YDR089W	YDR089W	Protein of unknown function; deletion confers resistance to nickel; contains an SPX domain, which is found in proteins involved in phosphate homeostasis	4		0.0068531	0.128084	-0.392698	-0.0095927	0.154617	0.171587	-0.0717753	-0.0963321	0.242106	-0.0028806	0.0727416	-0.496313	0.0263773	0.234871	-0.245663
YDR091C	RLI1	Essential iron-sulfur protein required for ribosome biogenesis and translation initiation and termination; facilitates binding of a multifactor complex (MFC) of initiation factors to the small ribosomal subunit; predicted ABC family ATPase	4		-0.008906	-0.0399824	-0.0388956	-0.236478	-0.195821	-0.0478585	-0.0380264	-0.191227	-0.0926571	-0.142508	0.0108565	-0.077171	-0.274405	-0.282451	-0.0798321
YDR092W	UBC13	Ubiquitin-conjugating enzyme involved in the error-free DNA postreplication repair pathway; interacts with Mms2p to assemble ubiquitin chains at the Ub Lys-63 residue; DNA damage triggers redistribution from the cytoplasm to the nucleus	4	ubiquitin conjugating enzyme complex	0.0446987	0.0446198	0.404761	0.254309	-0.0499435	-0.137757	-0.147069	0.0339869	-0.112332	-0.0638399	-0.0675305	-0.0063	0.0178926	-0.135684	-0.0719034
YDR093W	DNF2	Aminophospholipid translocase (flippase) that localizes primarily to the plasma membrane; contributes to endocytosis, protein transport and cell polarity; type 4 P-type ATPase	4		0.0541624	-0.0482353	-0.306312	-0.086022	0.0214587	0.00298365	-0.0705312	-0.0508228	0.0686997	0.327175	0.0292785	-0.214435	-0.144486	-0.155008	-0.19613
YDR096W	GIS1	Histone demethylase and transcription factor; regulates genes during nutrient limitation; negatively regulates DPP1, PHR1; activity modulated by limited proteasome-mediated proteolysis; has JmjC and JmjN domain in N-terminal region that interact, promoting stability and proper transcriptional activity; contains two transactivating domains downstream of Jmj domains and a C-terminal DNA binding dom…	4		-0.0495777	-0.0027441	-0.0117099	-0.298732	-0.0888329	0.14545	-0.18237	-0.230966	-0.153999	-0.198116	-0.0415895	0.510612	0.181038	-0.0478495	0.092721
YDR097C	MSH6	Protein required for mismatch repair in mitosis and meiosis, forms a complex with Msh2p to repair both single-base & insertion-deletion mispairs; potentially phosphorylated by Cdc28p	4	MSH2p/MSH6p complex	-0.110391	-0.0076046	-0.0339667	-0.155992	-0.162972	0.0659344	0.0774342	0.399558	-0.0256979	-0.105316	-0.0351065	-0.15575	-0.168736	0.236462	-0.232511
YDR098C	GRX3	Hydroperoxide and superoxide-radical responsive glutathione-dependent oxidoreductase; monothiol glutaredoxin subfamily member along with Grx4p and Grx5p; protects cells from oxidative damage; evidence exists indicating that the translation start site is not Met1 as currently annotated, but rather Met36	4		-0.0070291	-0.131775	0.187079	-0.107672	0.235791	0.0353164	0.0008963	0.0476719	-0.0852732	0.223683	0.116666	0.044342	0.192001	-0.322179	0.168529
YDR099W	BMH2	14-3-3 protein, minor isoform; controls proteome at post-transcriptional level, binds proteins and DNA, involved in regulation of many processes including exocytosis, vesicle transport, Ras/MAPK signaling, and rapamycin-sensitive signaling; protein abundance increases in response to DNA replication stress	4		-0.0348706	-0.024819	0.155851	0.0125324	-0.00113381	-0.11396	0.257356	0.0216355	0.133656	-0.0320336	-0.0291265	0.140588	-0.0846461	0.0727045	-0.011068
YDR101C	ARX1	Shuttling pre-60S factor; involved in the biogenesis of ribosomal large subunit biogenesis; interacts directly with Alb1; responsible for Tif6 recycling defects in absence of Rei1; associated with the ribosomal export complex	4		-0.017235	-0.0507408	-0.0857978	0.124719	0.0752984	-0.00719115	-0.0144655	-0.0635093	-0.0265097	-0.0637423	0.0049245	-0.042993	-0.244316	-0.600722	-0.0737669
YDR103W	STE5	Pheromone-responsive MAPK scaffold protein; couples activation of the G-protein-coupled pheromone receptor to MAPK activation; intramolecular interaction of PH and VWA domains blocks activation of assembled signaling cascade components (Ste11p, Ste7p and Fus3p) under basal conditions; Gbeta-gamma (Ste4p-Ste18p)-dependent docking at the plasma membrane and binding of PI(4,5)P2 by the PH domain rel…	4	STE5-MAPK complex						0.0882353	0.0919776	0.108145	0.106037	0.239222	0.0042555	-0.07066	-0.195904	-0.228769	-0.0762334
YDR108W	GSG1	Subunit of TRAPPIII (transport protein particle), a multimeric guanine nucleotide-exchange factor for Ypt1p, required for membrane expansion during autophagy and the CVT pathway; directs Ypt1p to the PAS; late post-replication meiotic role	4	TRAPP complex						-0.225271	0.0766684	0.31519	0.183154	0.146427	0.173326	0.082738	0.01248	0.259233	0.279086
YDR109C	YDR109C	Putative kinase	4		0.109719	0.0218711	-0.220014	-0.032515	-0.0524807	0.00938715	0.102694	0.164103	0.118313	0.157749	-0.0171915	0.204808	0.458925	0.342689	0.309697
YDR110W	FOB1	Nucleolar protein that binds the rDNA replication fork barrier (RFB) site; required for replication fork blocking, recombinational hotspot activity, condensin recruitment to RFB and rDNA repeat segregation; related to retroviral integrases	4		-0.0260972	0.154234	-0.0751284	0.184098	-0.0738783	-0.00036735	0.241857	0.348754	-0.7498	-0.549832	0.0728338	0.344911	0.197091	0.0458155	0.452969
YDR111C	ALT2	Catalytically inactive paralog of ALT1, an alanine transaminase; expression is repressed in the presence of alanine and repression is mediated by Nrg1p	4		0.0134129	-0.156774	-0.501387	-0.384053	-0.152663						-0.109146	0.137633	0.62619	0.19573	0.617359
YDR113C	PDS1	Securin, inhibits anaphase by binding separin Esp1p; blocks cyclin destruction and mitotic exit, essential for meiotic progression and mitotic cell cycle arrest; localization is cell-cycle dependent and regulated by Cdc28p phosphorylation	4	Esp1p/Pds1p complex	0.0574488	-0.181393	-0.136352	0.829568	-0.465708	-0.138911	-0.0293838	0.338501	-0.962917	-0.753378
YDR116C	MRPL1	Mitochondrial ribosomal protein of the large subunit	4	mitochondrial ribosomal large subunit	-0.0407347	0.100366	0.155496	0.110854	-0.162894	0.023797	0.133075	-0.152943	0.44028	-0.651877	0.0834707	0.348468	-0.171252	0.610143	0.19028
YDR117C	TMA64	Protein of unknown function that associates with ribosomes; has a putative RNA binding domain; in mammals the corresponding protein, eIF2D, has been shown to possess translation initiation factor activity	4		0.0319952	-0.0532245	-0.0806473	-0.0531345	-0.29304	0.143249	-0.114371	0.248248	-0.18171	0.0347068	0.0396595	0.004244	0.0011127	0.0261955	-0.0553936
YDR119W	VBA4	Protein of unknown function with proposed role as a basic amino acid permease based on phylogeny; GFP-fusion protein localizes to vacuolar membrane; physical interaction with Atg27p suggests a possible role in autophagy; non-essential gene	4		-0.199548	-0.102367	-0.451081	0.0737298	-0.303886	-0.0312701	-0.231894	-0.176034	0.141798	-0.23536	-0.0349085	0.078997	-0.265888	-0.0939515	-0.222709
YDR120C	TRM1	tRNA methyltransferase; two forms of the protein are made by alternative translation starts; localizes to both the nucleus and mitochondrion to produce the modified base N2,N2-dimethylguanosine in tRNAs in both compartments	4		-0.041871	-0.0311432	-0.251111	0.0031757	0.0469851	0.0664327	-0.0624486	-0.145334	0.0889777	-0.0858173	-0.0780555	-0.130788	-0.0675623	-0.411206	-0.154448
YDR121W	DPB4	Subunit of DNA pol epsilon and of ISW2 chromatin accessibility complex; involved in both chromosomal DNA replication and inheritance of telomeric silencing; stabilizes the interaction of Pol epsilon with primer-template DNA, positively affecting the processivity of the polymerase and exonuclease activities of Pol epsilon; interacts with extranucleosomal DNA and acts as anchor point for ISW2 compl…	4	chromatin accessibility complex, DNA polymerase epsilon complex	-0.0855094	0.0488079	0.210091	0.243713	0.00424445	0.0652993	0.0261853	0.375414	-0.0479771	0.0871234	-0.0610945	-0.071984	-0.0931941	0.0708805	0.07368
YDR122W	KIN1	Serine/threonine protein kinase involved in regulation of exocytosis; localizes to the cytoplasmic face of the plasma membrane; closely related to Kin2p	4		-0.0598403	0.0465371	0.184812	0.0176022	0.0876312	0.104789	-0.0203563	0.172096	0.0114892	-0.23821	-0.128292	0.287219	0.179098	0.323911	0.048758
YDR123C	INO2	Component of the heteromeric Ino2p/Ino4p basic helix-loop-helix transcription activator that binds inositol/choline-responsive elements (ICREs), required for derepression of phospholipid biosynthetic genes in response to inositol depletion	4	Ino2p/Ino4p basic helix-loop-helix heteromeric complex	-0.309072	-0.30856	-0.250951	0.334638	-0.355141	0.243792	-0.22275	-0.148	0.11183	0.0834354
YDR127W	ARO1	Pentafunctional arom protein, catalyzes steps 2 through 6 in the biosynthesis of chorismate, which is a precursor to aromatic amino acids	4		-0.0183198	-0.0445829	-0.302089	-0.167499	-0.196437	0.00098235	-0.129317	-0.31518	-0.170944	0.33131	-0.0099695	-0.499708	0.249503	-0.569017	-0.195496
YDR128W	MTC5	Subunit of the SEA (Seh1-associated) complex, a coatomer-related complex that associates dynamically with the vacuole; has N-terminal WD-40 repeats and a C-terminal RING motif; mtc5 is synthetically sick with cdc13-1	4		0.0378095	0.0082697	0.45498	0.226837	0.0961547	0.0112013	-0.0802418	0.255387	-0.194189	-0.203535	-0.0941515	-0.058998	0.189895	0.309224	0.258335
YDR129C	SAC6	Fimbrin, actin-bundling protein; cooperates with Scp1p (calponin/transgelin) in the organization and maintenance of the actin cytoskeleton	4		-0.0851164	0.0082187	0.0103772	0.0916218	0.0252	-0.0542343	0.0306132	-0.247208	0.0349708	0.0751498	-0.0618485	0.15299	0.300266	0.0973995	-0.0899354
YDR131C	YDR131C	F-box protein, substrate-specific adaptor subunit that recruits substrates to a core ubiquitination complex	4												0.0905649	0.291534	0.448975	0.165641	0.168931
YDR132C	YDR132C	Putative protein of unknown function; protein abundance increases in response to DNA replication stress	4		0.0586822	-0.182591	-0.198906	0.790034	0.237046						0.168647	0.077292	0.202447	-0.612216	-0.006064
YDR135C	YCF1	Vacuolar glutathione S-conjugate transporter; member of the ATP-binding cassette family; has a role in detoxifying metals such as cadmium, mercury, and arsenite; also transports unconjugated bilirubin, selenodigluthatione, and oxidized glutathione; similar to human cystic fibrosis protein CFTR	4		0.0413178	0.106906	0.0720516	0.233716	0.311082	-0.106393	0.241263	0.289404	-0.0409509	-0.0014883	0.072864	0.603465	0.378648	0.0172755	-0.100177
YDR137W	RGP1	Subunit of a Golgi membrane exchange factor (Ric1p-Rgp1p) that catalyzes nucleotide exchange on Ypt6p	4	guanyl-nucleotide exchange factor complex	0.046572	0.0800159	-0.0229611	0.100967	0.0843252	0.0171518	0.175635	0.182728	0.106331	0.499877	0.178087	-0.080395	0.193191	0.314915	0.123293
YDR138W	HPR1	Subunit of THO/TREX complexes that couple transcription elongation with mitotic recombination and with mRNA metabolism and export, subunit of an RNA Pol II complex; regulates lifespan; involved in telomere maintenance; similar to Top1p	4	THO complex, Cdc73p/Paf1p complex	-0.0510096	0.13444	0.105704	0.302808	0.13857	-0.0215786	0.027751	-0.0118108	-0.0548473	0.117043	0.082533	0.063156	0.181918	0.0904225	0.183195
YDR139C	RUB1	Ubiquitin-like protein with similarity to mammalian NEDD8; conjugation (neddylation) substrates include the cullins Cdc53p, Rtt101p, and Cul3p; activated by Ula1p and Uba3p (E1 enzyme pair); conjugation mediated by Ubc12p (E2 enzyme)	4		0.214321	-0.147632	0.273397	-0.0577369	0.215069	-0.00873515	0.224483	0.296496	0.45327	0.220138	-0.0064125	-0.140569	-0.0796821	-0.0322695	0.093148
YDR141C	DOP1	Golgi-localized, leucine-zipper domain containing protein; involved in endosome to Golgi transport, organization of the ER, establishing cell polarity, and morphogenesis; detected in highly purified mitochondria in high-throughput studies	4	Dop1p/Mon2p complex	-0.0278447	0.0896289	0.0954026	-0.0173454	-0.0841476	0.0671425	0.230651	0.542221	-0.185116	0.319329	-0.0153295	-0.066946	0.37211	0.387558	-0.0864359
YDR142C	PEX7	Peroxisomal signal receptor for the N-terminal nonapeptide signal (PTS2) of peroxisomal matrix proteins; WD repeat protein; defects in human homolog cause lethal rhizomelic chondrodysplasia punctata (RCDP)	4		0.0968319	0.0060201	0.145402	0.531475	-0.407909	0.0491617	0.227354	0.424734	-0.0839132	0.597203	0.114539	0.063721	0.0923941	0.545942	0.274992
YDR143C	SAN1	Ubiquitin-protein ligase; involved in the proteasome-dependent degradation of aberrant nuclear proteins; targets substrates with regions of exposed hydrophobicity containing 5 or more contiguous hydrophobic residues; contains intrinsically disordered regions that contribute to substrate recognition	4		-0.0560763	-0.296968	-0.293416	-0.0437106	-0.231769	-0.157503	-0.315191	0.080142	-0.249756	-0.0655465	0.0573385	-0.140706	-0.266444	-0.41092	-0.189581
YDR144C	MKC7	GPI-anchored aspartyl protease, member of the yapsin family of proteases involved in cell wall growth and maintenance; shares functions with Yap3p and Kex2p	4		0.18542	-0.276404	-0.0614833	-0.166601	0.0892963	-0.0478032	0.00847653	0.12619	-0.0586002	-0.481695	-0.0022165	-0.415124	-0.633692	-0.130729	-0.17373
YDR145W	TAF12	Subunit (61/68 kDa) of TFIID and SAGA complexes, involved in RNA polymerase II transcription initiation and in chromatin modification, similar to histone H2A	4	transcription factor TFIID complex, SAGA complex, SLIK (SAGA-like) complex	-0.0366045	0.0152969	0.019188	0.0497788	-0.0309676	0.0284033	-0.150953	-0.0652369	-0.102459	-0.0625602	-0.0376135	0.133408	-0.0087712	-0.0144415	0.12611
YDR146C	SWI5	Transcription factor that recruits Mediator and Swi/Snf complexes; activates transcription of genes expressed at the M/G1 phase boundary and in G1 phase; required for expression of the HO gene controlling mating type switching; localization to nucleus occurs during G1 and appears to be regulated by phosphorylation by Cdc28p kinase; SWI5 has a paralog, ACE2, that arose from the whole genome duplic…	4		0.0650451	0.187607	-0.00193686	0.509699	0.290092						0.187507	0.219174	0.675449	0.306668	0.224553
YDR147W	EKI1	Ethanolamine kinase, primarily responsible for phosphatidylethanolamine synthesis via the CDP-ethanolamine pathway; exhibits some choline kinase activity, thus contributing to phosphatidylcholine synthesis via the CDP-choline pathway	4												-0.206155	0.355228	0.0128878	-0.484397	-0.118795
YDR148C	KGD2	Dihydrolipoyl transsuccinylase, component of the mitochondrial alpha-ketoglutarate dehydrogenase complex, which catalyzes the oxidative decarboxylation of alpha-ketoglutarate to succinyl-CoA in the TCA cycle; phosphorylated	4	mitochondrial oxoglutarate dehydrogenase complex	-0.0494062	-0.0183331	-0.153436	-0.232648	-0.275003	0.0401282	-0.16291	-0.160217	-0.063975	-0.637335	0.0588565	0.012756	-0.281147	0.310973	-0.0852889
YDR150W	NUM1	Protein required for nuclear migration, localizes to the mother cell cortex and the bud tip; may mediate interactions of dynein and cytoplasmic microtubules with the cell cortex	4		-0.0057201	0.0079181	-0.0470993	-0.0953026	0.151751	0.0156592	-0.0710675	0.138982	0.0133731	-0.0362617	0.0089725	-0.081511	-0.152861	0.0929015	-0.106428
YDR152W	GIR2	Highly-acidic cytoplasmic RWD domain-containing protein of unknown function; forms a complex with Rbg2p; interacts with Rbg1p and Gcn1p; associates with translating ribosomes; putative intrinsically unstructured protein	4		-0.0248188	-0.142909	-0.014108	0.0369128	-0.0538354	-0.0153114	-0.216954	-0.0632148	-0.346289	-0.0002735	0.0740397	-0.203729	0.0263526	-0.274815	0.005689
YDR153C	ENT5	Protein containing an N-terminal epsin-like domain involved in clathrin recruitment and traffic between the Golgi and endosomes; associates with the clathrin adaptor Gga2p, clathrin adaptor complex AP-1, and clathrin	4		0.0187505	-0.0667392	-0.230648	-0.201445	-0.133329	0.0336812	0.152058	-0.0862499	-0.223789	0.196788	-0.0499615	0.024074	-0.14498	-0.230434	0.053536
YDR155C	CPR1	Cytoplasmic peptidyl-prolyl cis-trans isomerase (cyclophilin); catalyzes the cis-trans isomerization of peptide bonds N-terminal to proline residues; binds the drug cyclosporin A; protein abundance increases in response to DNA replication stress	4	Set3p complex	0.0371237	-0.258507	0.0221949	-0.302814	-0.164463	-0.0369989	-0.0735884	0.493373	0.36425	0.0128647	-0.0824795	0.27262	-0.389119	-0.17537	-0.747863
YDR156W	RPA14	RNA polymerase I subunit A14	4	DNA-directed RNA polymerase I complex	-0.0152587	-0.207963	-0.149701	-0.227629	-0.0723088	-0.0520134	-0.157718	-0.186247	-0.0606139	-0.0384835	-0.0863635	-0.128636	-0.392417	-0.330298	-0.309612
YDR158W	HOM2	Aspartic beta semi-aldehyde dehydrogenase, catalyzes the second step in the common pathway for methionine and threonine biosynthesis; expression regulated by Gcn4p and the general control of amino acid synthesis	4		-0.0102245	-0.264946	-0.44804	-0.460268	-0.310223	-0.0413906	-0.309615	-0.621315	0.139942	0.413283	-0.0578755	-1.03628	0.182039	-1.54795	-0.814646
YDR159W	SAC3	Nuclear pore-associated protein; required for biogenesis of the small ribosomal subunit; component of TREX-2 complex (Sac3p-Thp1p-Sus1p-Cdc31p) involved in transcription elongation and mRNA export from the nucleus; involved in post-transcriptional tethering of active genes to the nuclear periphery and to non-nascent mRNP; similar to the human germinal center-associated nuclear protein (GANP)	4	Sac3p/Thp1p complex	0.223323	0.197579	0.0176383	-0.245696	-0.07183	0.00628305	0.276306	0.189192	0.00364965	0.0725344	-0.206385	-0.231738	-0.049264	-0.0486995	0.03058
YDR161W	YDR161W	Putative protein of unknown function; non-essential gene; proposed function in rRNA and ribosome biosynthesis based on transcriptional co-regulation; genetic interactions suggest a role in ER-associated protein degradation (ERAD)	4		0.007267	-0.119748	-0.166843	0.0730088	-0.0178419	0.0519788	-0.0515604	0.0139905	-0.177174	0.109681	0.0881617	-0.019332	0.0370151	-0.262138	-0.02543
YDR162C	NBP2	Protein involved in the HOG (high osmolarity glycerol) pathway, negatively regulates Hog1p by recruitment of phosphatase Ptc1p the Pbs2p-Hog1p complex, found in the nucleus and cytoplasm, contains an SH3 domain that binds Pbs2p	4							0.0950462	-0.178077	-0.128287	0.0191938	0.107447	-0.0685535	-0.183759	-0.275373	-0.108353	-0.182623
YDR163W	CWC15	Non-essential protein involved in pre-mRNA splicing, component of a complex containing Cef1p; has similarity to S. pombe Cwf15p	4		0.0083254	0.0098827	-0.118277	-0.141638	-0.337711	0.0868697	-0.399595	-0.109711	-0.148131	0.389215	0.15548	-0.460626	-0.18119	-0.10106	-0.02355
YDR164C	SEC1	Sm-like protein involved in docking and fusion of exocytic vesicles; binds to assembled SNARE complexes at the membrane and stimulates membrane fusion; localization to sites of secretion (bud neck and bud tip) is dependent on SNARE function	4		-0.108918	-0.0433056	0.0208226	0.402751	-0.122849	0.0744549	0.0493185	0.0451372	-0.0224973	0.15544	-0.0351115	0.002412	0.328432	0.131748	0.093611
YDR165W	TRM82	Catalytic subunit of a tRNA methyltransferase complex; Trm8p and Trm82p comprise an enzyme that catalyzes a methyl-transfer from S-adenosyl-l-methionine to the N(7) atom of guanine at position 46 in tRNA; Trm8 lacks catalytic activity if not bound to Trm82p	4	tRNA Methyltransferase Complex	-0.0350747	-0.009324	-0.0993165	0.160326	-0.0545131	-0.0146471	-0.0011917	0.0244506	-0.220217	-0.117388	0.0287985	0.094502	0.0214011	-0.142337	0.126408
YDR166C	SEC5	Essential 107kDa subunit of the exocyst complex (Sec3p, Sec5p, Sec6p, Sec8p, Sec10p, Sec15p, Exo70p, and Exo84p), which has the essential function of mediating polarized targeting of secretory vesicles to active sites of exocytosis	4	Exocyst complex	-0.128112	-0.0968479	-0.109062	0.0668358	-0.0728473	0.104868	0.0928283	0.165254	-0.00374025	0.19394	-0.0017895	0.118279	0.121217	0.0556715	0.161911
YDR167W	TAF10	Subunit (145 kDa) of TFIID and SAGA complexes, involved in RNA polymerase II transcription initiation and in chromatin modification	4	transcription factor TFIID complex, SAGA complex, SLIK (SAGA-like) complex	0.0162723	-0.0033307	0.0955986	0.0645638	0.0173995	0.0842236	-0.123109	-0.138396	-0.0487348	0.111389	-0.0244235	-0.062013	-0.0928761	-0.223088	0.410626
YDR168W	CDC37	Essential Hsp90p co-chaperone; necessary for passage through the START phase of the cell cycle; stabilizes protein kinase nascent chains and participates along with Hsp90p in their folding	4		-0.0275618	-0.100197	-0.0905622	-0.0598154	-0.0930035	-0.0208561	-0.0478858	-0.191343	-0.0543948	0.201254	-0.0937945	-0.147728	-0.0018701	-0.27516	-0.230914
YDR169C	STB3	Ribosomal RNA processing element (RRPE)-binding protein involved in the glucose-induced transition from quiescence to growth; restricted to nucleus in quiescent cells, released into cytoplasm after glucose repletion; binds Sin3p	4		0.149983	0.202625	-0.106621	0.134673	-0.0521699	0.146104	0.243143	0.15973	0.120018	-0.127444	0.0339585	0.192416	0.0078482	-0.0495385	0.025641
YDR170C	SEC7	Guanine nucleotide exchange factor (GEF) for ADP ribosylation factors involved in proliferation of the Golgi, intra-Golgi transport and ER-to-Golgi transport; found in the cytoplasm and on Golgi-associated coated vesicles	4		-0.0060449	-0.0142102	-0.247721	-0.183515	-0.0517119	0.0265258	0.0051859	0.0727579	-0.313664	-0.175143	-0.0184445	-0.125761	0.0962084	0.0153325	-0.22283
YDR171W	HSP42	Small heat shock protein (sHSP) with chaperone activity; forms barrel-shaped oligomers that suppress unfolded protein aggregation; involved in cytoskeleton reorganization after heat shock; protein abundance increases in response to DNA replication stress	4		-0.064758	0.0261122	0.128848	-0.196219	0.274847	-0.0385022	0.27586	0.25982	-0.69019	-0.989714	-0.116186	0.31692	0.477643	0.788415	0.423403
YDR172W	SUP35	Translation termination factor eRF3, has a role in mRNA deadenylation and decay; altered protein conformation creates the [PSI(+)] prion that alters translational fidelity and results in a nonsense suppressor phenotype	4	translation release factor complex	-0.0045418	-0.0643846	-0.0632465	-0.0753049	-0.135365	-0.0489566	-0.0514184	-0.0357997	-0.113252	-0.000347	-0.0139335	-0.036297	-0.0191463	-0.284317	-0.0666068
YDR173C	ARG82	Inositol polyphosphate multikinase (IPMK), sequentially phosphorylates Ins(1,4,5)P3 to form Ins(1,3,4,5,6)P5; also has diphosphoinositol polyphosphate synthase activity; regulates arginine-, phosphate-, and nitrogen-responsive genes	4	ARGR complex	0.0846215	-0.109131	-0.0811644	0.0866398	-0.0398691	0.301826	-0.13345	0.388719	0.372358	0.783138	0.0415475	0.000829	-0.0486524	-0.183503	0.079534
YDR174W	HMO1	Chromatin associated high mobility group (HMG) family member involved in genome maintenance; rDNA-binding component of the Pol I transcription system; associates with a 5'-3' DNA helicase and Fpr1p, a prolyl isomerase	4		-0.0288128	0.134158	-0.167644	-0.0345736	-0.317017	-0.0332099	0.041419	-0.150943	-0.136193	-0.191453	0.0407905	0.130848	-0.283226	-0.393397	-0.0642176
YDR175C	RSM24	Mitochondrial ribosomal protein of the small subunit	4	mitochondrial ribosomal small subunit	-0.0563586	-0.224136	-0.0560774	-0.225772	-0.341548	-0.0166956	0.0544145	-0.204	0.0602135	-0.264328	0.427787	0.804889	0.625475	0.725996	0.725067
YDR176W	NGG1	Transcriptional regulator involved in glucose repression of Gal4p-regulated genes; component of transcriptional adaptor and histone acetyltransferase complexes, the ADA complex, the SAGA complex, and the SLIK complex	4	Ada2p/Gcn5p/Ada3 transcription activator complex, SAGA complex, SLIK (SAGA-like) complex	0.0705511	0.161583	-0.107468	0.0338992	-0.441525	0.152825	-0.103892	0.00099257	-0.200005	-0.219732	0.0360255	0.01105	-0.224593	-0.0673335	0.026107
YDR177W	UBC1	Ubiquitin-conjugating enzyme; mediates selective degradation of short-lived and abnormal proteins; plays a role in vesicle biogenesis and ER-associated protein degradation (ERAD); component of the cellular stress response; protein abundance increases in response to DNA replication stress	4		-0.0205276	-0.0581397	0.0783423	0.0411888	0.0577894	0.152033	0.0462234	-0.050191	-0.0535444	0.273247	-0.0224705	0.033928	-0.226112	-0.166509	-0.0865734
YDR178W	SDH4	Membrane anchor subunit of succinate dehydrogenase (Sdh1p, Sdh2p, Sdh3p, Sdh4p), which couples the oxidation of succinate to the transfer of electrons to ubiquinone as part of the TCA cycle and the mitochondrial respiratory chain	4	Succinate dehydrogenase complex (complex II)	0.114172	-0.0195461	0.215437	-0.328504	-0.103116	0.153476	-0.23251	0.232641	0.440399	-0.983904	0.756585	0.102557	0.108479	0.266503	0.609329
YDR179C	CSN9	Subunit of the Cop9 signalosome, which is required for deneddylation, or removal of the ubiquitin-like protein Rub1p from Cdc53p (cullin); involved in adaptation to pheromone signaling	4	signalosome complex											-0.188976	0.970009	0.117737	0.652276	0.516969
YDR180W	SCC2	Subunit of cohesin loading factor (Scc2p-Scc4p), a complex required for loading of cohesin complexes onto chromosomes; involved in establishing sister chromatid cohesion during DSB repair via histone H2AX; evolutionarily-conserved adherin	4	cohesin loading factor complex	0.167764	-0.002461	0.33366	-0.0444213	0.298411	0.0445677	-0.0248773	0.0833479	0.128643	0.516329	0.264669	0.963139	0.551005	1.24253	0.604099
YDR181C	SAS4	Subunit of the SAS complex (Sas2p, Sas4p, Sas5p), which acetylates free histones and nucleosomes and regulates transcriptional silencing; required for the HAT activity of Sas2p	4	SAS Complex						0.223872	-0.0190881	0.619124	0.0396997	0.202595	0.0699259	0.133046	-0.348704	0.123277	-0.044468
YDR182W	CDC1	Putative lipid phosphatase of the endoplasmic reticulum; shows Mn2+ dependence and may affect Ca2+ signaling; mutants display actin and general growth defects and pleiotropic defects in cell cycle progression and organelle distribution	4		-0.121673	-0.211663	-0.0751057	-0.268803	-0.190598	-0.142809	-0.387051	-0.00518644	-0.309823	-0.395776	0.228081	0.216746	-0.0668084	0.0346725	0.319961
YDR183W	PLP1	Protein that interacts with CCT (chaperonin containing TCP-1) complex and has a role in actin and tubulin folding; has weak similarity to phosducins, which are G-protein regulators	4		-0.0731304	-0.0439443	0.0749911	0.323103	0.0586508	-0.0685917	-0.143347	0.0813623	-0.0965372	0.206692	0.0515625	-0.187124	0.141513	0.104129	0.150596
YDR186C	YDR186C	Putative protein of unknown function; may interact with ribosomes, based on co-purification experiments; green fluorescent protein (GFP)-fusion protein localizes to the cytoplasm	4		0.257913	-0.0586772	0.11501	0.0723798	0.357014	-0.0592913	-0.0757757	0.0165124	-0.0224473	0.160912	0.0967176	0.104008	0.122323	-0.0799195	0.034191
YDR188W	CCT6	Subunit of the cytosolic chaperonin Cct ring complex, related to Tcp1p, essential protein that is required for the assembly of actin and tubulins in vivo; contains an ATP-binding motif	4	chaperonin-containing T-complex	-0.0695754	-0.0223824	0.0397191	-0.0716245	-0.131294	0.0134731	0.0288944	0.0990732	-0.00270535	0.0431705	0.0859011	-0.103034	0.0614854	-0.408985	-0.0567194
YDR189W	SLY1	Hydrophilic protein involved in vesicle trafficking between the ER and Golgi; SM (Sec1/Munc-18) family protein that binds the tSNARE Sed5p and stimulates its assembly into a trans-SNARE membrane-protein complex	4		-0.0635317	0.0857369	0.0921396	0.123774	-0.0229798	0.0918978	-0.0476581	0.176572	-0.213118	0.0772521	0.0472125	-0.108397	0.233027	0.0393715	0.056851
YDR190C	RVB1	ATP-dependent DNA helicase, also known as pontin; member of the AAA+ and RuvB-like protein families; similar to Rvb2p; conserved component of multiple complexes including the INO80 complex, the Swr1 complex, and the R2TP complex (Rvb1-Rvb2-Tah1-Pih1); involved in multiple processes such as chromatin remodeling, box C/D snoRNP assembly, and RNA polymerase II assembly	4	Ino80p complex, Swr1p complex	0.0050556	-0.0389471	-0.0643092	-0.0043277	-0.0470656	-0.0596145	-0.0135909	-0.236104	-0.149407	0.0916871	0.0017615	-0.178321	0.0406364	-0.0851575	0.006168
YDR192C	NUP42	FG-nucleoporin component of central core of the nuclear pore complex (NPC); also part of the NPC cytoplasmic filaments; contributes directly to nucleocytoplasmic transport and maintenance of the NPC permeability barrier and is involved in gene tethering at the nuclear periphery; interacts with Gle1p	4		0.118094	-0.169088	0.0529676	-0.25961	-0.312953	0.044071	-0.221115	-0.253411	-0.0208858	0.0811269	0.138784	0.114602	0.0774617	-0.155319	0.313734
YDR194C	MSS116	DEAD-box protein required for efficient splicing of mitochondrial Group I and II introns; non-polar RNA helicase that also facilities strand annealing	4		-0.0155675	0.0738389	0.231597	-0.264681	-0.00406574	-0.0271343	0.123493	-0.116516	0.316552	-0.683876	-0.0365245	0.392133	0.134762	0.124755	-0.275006
YDR195W	REF2	RNA-binding protein involved in the cleavage step of mRNA 3'-end formation prior to polyadenylation, and in snoRNA maturation; part of holo-CPF subcomplex APT, which associates with 3'-ends of snoRNA- and mRNA-encoding genes	4	mRNA cleavage and polyadenylation specificity factor complex	0.0484	0.0059508	0.0854644	0.0627238	0.00658425	0.014444	-0.0801477	-0.113715	0.256196	0.264125	-0.0290185	-0.129788	0.0441164	0.0901535	0.097076
YDR196C	CAB5	Probable dephospho-CoA kinase (DPCK) that catalyzes the last step in coenzyme A biosynthesis; null mutant lethality is complemented by E. coli coaE (encoding DPCK); detected in purified mitochondria in high-throughput studies	4												0.0292225	-0.145712	0.321624	1.01111	0.252563
YDR200C	VPS64	Protein required for cytoplasm to vacuole targeting of proteins; forms a complex with Far3p and Far7p to Far11p involved in recovery from pheromone-induced cell cycle arrest; mutant has increased aneuploidy tolerance	4	Far3p/Far7p/Far8p/Far9p/Far10p/Far11p complex	-0.217904	-0.0864864	-0.146863	-0.125988	-0.20616	-0.0585721	0.044976	0.211554	0.0561511	0.140856	0.562268	0.055761	0.787998	0.655915	0.735046
YDR201W	SPC19	Essential subunit of the Dam1 complex (aka DASH complex), couples kinetochores to the force produced by MT depolymerization thereby aiding in chromosome segregation; also localized to nuclear side of spindle pole body	4	DASH complex	-0.286925	0.0968269	-0.260636	-0.153169	-0.443773	0.222942	-0.272166	-0.784536	0.0679919	-0.310791	-0.0460695	-0.22597	-0.0847621	-0.270707	0.05782
YDR202C	RAV2	Subunit of RAVE (Rav1p, Rav2p, Skp1p), a complex that associates with the V1 domain of the vacuolar membrane (H+)-ATPase (V-ATPase) and promotes assembly and reassembly of the holoenzyme	4	RAVE complex	0.326341	0.132942	0.58814	0.128177	0.0869653	0.0442721	-0.194591	0.335474	-0.243535	-0.0619865	0.0120955	0.203202	0.219281	-0.0276985	0.040117
YDR204W	COQ4	Protein with a role in ubiquinone (Coenzyme Q) biosynthesis, possibly functioning in stabilization of Coq7p; located on the matrix face of the mitochondrial inner membrane; component of a mitochondrial ubiquinone-synthesizing complex	4	Q-biosynthetic Coq polypeptide complex	0.0820575	-0.197532	0.293546	-0.228724	-0.0160945	0.0724764	0.165054	0.552299	0.0907671	-0.203386	-0.136641	-0.067269	-0.0827001	0.19795	-0.309947
YDR206W	EBS1	Protein involved in inhibition of translation and nonsense-mediated decay; interacts with cap binding protein Cdc33p and with Nam7p; localizes to P-bodies upon glucose starvation; mRNA abundance regulated by mRNA decay factors	4							0.0946857	0.277004	0.238989	-0.10474	0.307462	0.136803	0.22662	-0.067881	-0.102637	0.114884
YDR207C	UME6	Key transcriptional regulator of early meiotic genes, binds URS1 upstream regulatory sequence, couples metabolic responses to nutritional cues with initiation and progression of meiosis, forms complex with Ime1p, and also with Sin3p-Rpd3p	4	Ume6p/Ime1p complex, Rpd3L complex						0.0359261	-0.122085	-0.340307	-0.200566	-0.240469	-0.386654	0.839829	-0.928035	-0.595372	-0.688956
YDR208W	MSS4	Phosphatidylinositol-4-phosphate 5-kinase, involved in actin cytoskeleton organization and cell morphogenesis; multicopy suppressor of stt4 mutation	4		-0.0143514	-0.0820011	0.103504	0.324348	0.0483714	0.0343102	-0.0811167	0.123874	0.154794	-0.133049	0.238704	0.156426	0.0284913	0.0487755	0.192718
YDR211W	GCD6	Catalytic epsilon subunit of the translation initiation factor eIF2B, the guanine-nucleotide exchange factor for eIF2; activity subsequently regulated by phosphorylated eIF2; first identified as a negative regulator of GCN4 expression	4	eIF2B	-0.0210983	-0.133404	-0.221633	0.134611	-0.101032	-0.0180676	-0.0188174	0.130857	-0.0961301	-0.0614352	0.0965574	-0.092212	0.200467	-0.392682	-0.032334
YDR212W	TCP1	Alpha subunit of chaperonin-containing T-complex, which mediates protein folding in the cytosol; involved in actin cytoskeleton maintenance; overexpression in neurons suppresses formation of pathogenic conformations of huntingtin protein	4	chaperonin-containing T-complex	-0.0031426	-0.0373742	0.0997396	-0.151502	-0.0972727	-0.0290657	0.0142929	0.0210436	-0.0320117	-0.046196	-0.0357695	-0.112233	-0.0121006	-0.466019	-0.150996
YDR213W	UPC2	Sterol regulatory element binding protein; induces transcription of sterol biosynthetic genes and of DAN/TIR gene products; relocates from intracellular membranes to perinuclear foci on sterol depletion; UPC2 has a paralog, ECM22, that arose from the whole genome duplication	4		-0.0941744	0.248051	0.513996	-0.431474	1.13378	0.0850856	0.249057	-0.0480476	-0.144517	-0.0215486	-0.0725555	-0.369183	-0.182866	-0.172021	-0.202454
YDR214W	AHA1	Co-chaperone that binds to Hsp82p and activates its ATPase activity; similar to Hch1p; expression is regulated by stresses such as heat shock; protein abundance increases in response to DNA replication stress	4		-0.0049571	-0.0778508	0.220515	0.3321	0.253867	-0.0130928	0.0438019	0.567546	-0.0877122	-0.100767	-0.179451	-0.597482	0.514589	0.539508	0.579108
YDR216W	ADR1	Carbon source-responsive zinc-finger transcription factor, required for transcription of the glucose-repressed gene ADH2, of peroxisomal protein genes, and of genes required for ethanol, glycerol, and fatty acid utilization	4		0.0793367	0.169762	1.1643	0.0514858	1.06371	0.0963491	1.02918	0.943627	-0.260066	0.740073	-0.0204495	0.725372	0.783346	2.25615	0.60037
YDR217C	RAD9	DNA damage-dependent checkpoint protein, required for cell-cycle arrest in G1/S, intra-S, and G2/M; transmits checkpoint signal by activating Rad53p and Chk1p; hyperphosphorylated by Mec1p and Tel1p; potential Cdc28p substrate	4		-0.219835	-0.0507985	0.133021	0.0766868	0.165529	-0.0723977	-0.0475636	-0.00985714	-0.0546792	0.605784	0.14412	-0.060926	0.0290534	-0.184373	-0.00056
YDR219C	MFB1	Mitochondria-associated F-box protein involved in maintenance of normal mitochondrial morphology; interacts with Skp1p through the F-box motif; preferentially localizes to the mother cell during budding	4		0.0449391	0.160572	0.355051	0.188061	0.104642	0.118442	0.113171	0.161531	0.088137	-0.245395	0.127579	0.316061	-0.0405518	-0.193116	0.168625
YDR221W	GTB1	Glucosidase II beta subunit, forms a complex with alpha subunit Rot2p, involved in removal of two glucose residues from N-linked glycans during glycoprotein biogenesis in the ER	4	Rot2p/Gtb1p complex	0.0270599	-0.0896737	0.225674	0.172658	0.0470271	-0.00131355	-0.0255558	0.0645102	-0.00077355	-0.0879393	0.0561065	-0.162082	0.200653	-0.212245	-0.0988397
YDR222W	YDR222W	Protein of unknown function; green fluorescent protein (GFP)-fusion protein localizes to the cytoplasm in a punctate pattern	4		0.050128	0.286459	0.339386	-1.14011	0.726102	-0.0551185	0.0711277	0.0629723	0.045333	-0.140923	-0.0433985	-1.22152	0.175825	-1.54032	1.18309
YDR224C	HTB1	Histone H2B, core histone protein required for chromatin assembly and chromosome function; nearly identical to HTB2; Rad6p-Bre1p-Lge1p mediated ubiquitination regulates transcriptional activation, meiotic DSB formation and H3 methylation	4	Nucleosomal protein complex, Chz1p/Htz1p/Htb1p complex	0.0327594	0.102758	-0.185251	-0.0218092	-0.496396	-0.0720733	0.110936	-0.58509	-0.229135	-0.750722	-0.067158	0.349573	-0.393739	-0.335011	-0.000395
YDR225W	HTA1	Histone H2A, core histone protein required for chromatin assembly and chromosome function; one of two nearly identical subtypes (see also HTA2); DNA damage-dependent phosphorylation by Mec1p facilitates DNA repair; acetylated by Nat4p	4	Nucleosomal protein complex	-0.0169718	0.17622	-0.11345	0.261484	-0.368079	0.0028218	0.176144	-0.399668	-0.0886088	-0.394201	0.031623	0.384271	-0.315891	-0.253696	0.225564
YDR226W	ADK1	Adenylate kinase, required for purine metabolism; localized to the cytoplasm and the mitochondria; lacks cleavable signal sequence; protein abundance increases in response to DNA replication stress	4		0.0553766	-0.34916	-0.509427	-0.48422	-0.49111	-0.0682536	-0.0727877	-0.163714	0.228652	-0.295831	0.0018605	-0.457903	-0.533909	-0.972276	-1.16814
YDR227W	SIR4	Silent information regulator that, together with SIR2 and SIR3, is involved in assembly of silent chromatin domains at telomeres and the silent mating-type loci; potentially phosphorylated by Cdc28p; some alleles of SIR4 prolong lifespan	4	chromatin silencing complex	0.0706635	0.0607259	0.152643	0.0595118	0.167497	0.084464	0.234296	0.161619	-0.0933551	-0.0754443	-0.103013	-0.164111	0.128	-0.0543985	0.090204
YDR228C	PCF11	mRNA 3' end processing factor, essential component of cleavage and polyadenylation factor IA (CF IA), involved in pre-mRNA 3' end processing and in transcription termination; binds C-terminal domain of largest subunit of RNA pol II (Rpo21p); required for gene looping	4	mRNA cleavage factor complex (CFI)	-0.0822744	0.138254	0.170479	0.54493	0.0735983						-0.129147	0.220035	0.193401	0.453845	0.339189
YDR229W	IVY1	Phospholipid-binding protein that interacts with both Ypt7p and Vps33p, may partially counteract the action of Vps33p and vice versa, localizes to the rim of the vacuole as cells approach stationary phase	4		-0.0049172	0.127187	-0.00020074	0.0788428	-0.205078	-0.113655	-0.062985	-0.211155	0.0165384	-0.159718	0.141954	0.007282	-0.062765	-0.0771015	0.189353
YDR231C	COX20	Mitochondrial inner membrane protein, required for proteolytic processing of Cox2p and its assembly into cytochrome c oxidase	4		-0.119761	-0.0582687	0.214558	-0.0268235	-0.516714	0.0130083	-0.33856	-0.227344	-0.013971	-1.09776	0.259165	0.664534	0.236609	0.634865	-0.22275
YDR232W	HEM1	5-aminolevulinate synthase, catalyzes the first step in the heme biosynthetic pathway; an N-terminal signal sequence is required for localization to the mitochondrial matrix; expression is regulated by Hap2p-Hap3p	4		0.0429806	-0.0894338	-0.275403	0.0123684	-0.20881	0.0400144	-0.0732946	-0.280724	0.0823781	-0.14167	0.158149	-0.3166	-0.0690057	-0.112692	-0.696989
YDR233C	RTN1	Reticulon protein that stabilizes membrane curvature; interacts with Rtn2p, Yop1p, and Sey1p to maintain tubular ER morphology; involved in nuclear pore assembly; rtn1 rtn2 yop1 triple mutant shows loss of tubular ER; mutant overexpressing RTN1 shows increase in tubular ER; interacts with exocyst subunit Sec6p, with Yip3p, and with Sbh1p; similar to and more abundant than Rtn2p; member of the RTN…	4		-0.0181972	-0.303001	-0.150187	-0.602671	-0.0870838	0.0115265	-0.199208	-0.253156	-0.0511419	0.0644664	0.0027375	-0.297277	-0.0187473	-0.37321	0.008552
YDR234W	LYS4	Homoaconitase, catalyzes the conversion of homocitrate to homoisocitrate, which is a step in the lysine biosynthesis pathway	4		-0.0608673	1.04268	-0.486479	0.617491	0.786478	-0.118227	0.839084	0.383444	0.73724	1.08432	0.0615365	0.509557	0.385703	0.236538	0.436233
YDR236C	FMN1	Riboflavin kinase, produces riboflavin monophosphate (FMN); FMN is a necessary cofactor for many enzymes; predominantly localizes to the microsomal fraction and also found in the mitochondrial inner membrane	4							-0.157246	0.252209	-0.0595746	-0.0336393	0.198248
YDR237W	MRPL7	Mitochondrial ribosomal protein of the large subunit; MRPL7 produces both YmL5 and YmL7, which are two different modified forms of the same protein	4	mitochondrial ribosomal large subunit	-0.157362	0.0319209	0.206507	0.0380178	-0.227496	0.116517	0.0908248	-0.342541	0.206057	-0.486278	-0.0104065	0.501445	0.0003628	0.526196	0.036421
YDR238C	SEC26	Essential beta-coat protein of the COPI coatomer, involved in ER-to-Golgi protein trafficking and maintenance of normal ER morphology; shares 43% sequence identity with mammalian beta-coat protein (beta-COP)	4	COPI	0.0299381	0.0561539	0.111988	0.124238	0.00538415	-0.00471935	0.0610446	0.0106614	-0.0909302	-0.128445	-0.0730845	-0.063296	0.124821	-0.102836	-0.021145
YDR239C	YDR239C	Protein of unknown function that may interact with ribosomes, based on co-purification experiments	4		-0.130448	0.006533	-0.201604	0.194111	0.111696	0.0422455	-0.0724451	-0.185412	-0.0132922	-0.0532289	-0.0010265	-0.147324	-0.0230059	0.0118085	-0.22019
YDR240C	SNU56	Component of U1 snRNP required for mRNA splicing via spliceosome; yeast specific, no metazoan counterpart; interacts with mRNA in commitment complex	4	commitment complex, U1 snRNP complex	0.0070159	0.0937389	-0.0678006	0.147227	0.045179	-0.174944	-0.0239021	-0.189399	-0.252124	-0.0853643	0.107372	0.182044	0.159478	0.170737	0.348445
YDR243C	PRP28	RNA helicase in the DEAD-box family, involved in RNA isomerization at the 5' splice site	4	U5 snRNP complex	0.0599746	0.0380779	0.042287	0.197556	0.214572	0.19787	0.09077	0.142804	0.0338297	0.0680998	0.0414905	0.15064	-0.0632144	-0.0020815	0.036923
YDR244W	PEX5	Peroxisomal membrane signal receptor for the C-terminal tripeptide signal sequence (PTS1) of peroxisomal matrix proteins, required for peroxisomal matrix protein import; also proposed to have PTS1-receptor independent functions	4		0.15863	-0.0153051	-0.167779	0.308994	0.29157	0.0204479	0.0498944	-0.170646	0.0479764	0.11458	-0.0193355	-0.258137	0.0510631	-0.138956	-0.323245
YDR245W	MNN10	Subunit of a Golgi mannosyltransferase complex also containing Anp1p, Mnn9p, Mnn11p, and Hoc1p that mediates elongation of the polysaccharide mannan backbone; membrane protein of the mannosyltransferase family	4	alpha-1,6-mannosyltransferase complex(Anp1p/Mnn9p)	-0.0906234	-0.137227	-0.407673	-0.251678	-0.366972	-0.00142405	0.0873888	0.212032	-0.402444	-0.372187	0.136206	-0.081498	-0.0488229	-0.25658	0.105248
YDR246W	TRS23	One of 10 subunits of the transport protein particle (TRAPP) complex of the cis-Golgi which mediates vesicle docking and fusion; involved in endoplasmic reticulum (ER) to Golgi membrane traffic; human homolog is TRAPPC4	4	TRAPP complex	0.0964326	0.210277	0.19307	0.35457	0.17834	0.0308693	0.366299	0.25014	-0.0423918	0.36985	0.0908783	0.262221	-0.0252056	0.37399	0.329241
YDR248C	YDR248C	Putative protein of unknown function; sequence similarity to bacterial and human gluconokinase; green fluorescent protein (GFP)-fusion protein localizes to the cytoplasm; upregulated by deletion of the RNAP-II associated factor, PAF1	4		0.0109422	0.0149733	0.323779	0.349443	-0.00886719	0.0739687	0.0968768	-0.0685641	0.151741	0.0268852	-0.0463895	-0.068167	0.233609	0.0741135	0.030504
YDR251W	PAM1	Essential protein of unknown function; exhibits variable expression during colony morphogenesis; overexpression permits survival without protein phosphatase 2A, inhibits growth, and induces a filamentous phenotype	4		0.134931	0.0971909	-0.0272307	-0.0453093	0.0292984	0.137512	0.0747869	0.0830851	0.00011895	0.0776515	0.0137735	0.111418	-0.0312019	0.362484	-0.006848
YDR252W	BTT1	Beta3 subunit of the heterotrimeric nascent polypeptide-associated complex which binds ribosomes via its beta-subunits in close proximity to nascent polypeptides; interacts with Caf130p of the CCR4-NOT complex; similar to human BTF3	4	nascent polypeptide-associated complex						0.0189597	-0.256823	-0.0888211	-0.0116207	0.0552557	-0.0908205	-0.450896	-0.484937	-0.499827	-1.99605
YDR255C	RMD5	Component of GID Complex that confers ubiquitin ligase (U3) activity; necessary for polyubiquitination and degradation of the gluconeogenic enzyme fructose-1,6-bisphosphatase; forms dimer with Fyv10p that is then recruited to GID Complex by Gid8p; also required for sporulation; conserved protein that has a degenerate RING finger domain	4	FBP degradation complex	0.0026559	-0.0513177	0.336729	0.285195	-0.135999	0.0732229	0.419914	0.692833	-0.141176	0.0360253	0.209401	0.244287	0.233781	0.640495	0.288594
YDR257C	RKM4	Ribosomal lysine methyltransferase specific for monomethylation of Rpl42ap and Rpl42bp (lysine 55); nuclear SET-domain containing protein	4		0.0983067	-0.0421002	0.0960476	0.0443708	0.120666	0.129662	-0.0277813	0.239092	0.168777	0.456994	0.0181665	0.193751	0.241565	0.0820065	0.116335
YDR258C	HSP78	Oligomeric mitochondrial matrix chaperone that cooperates with Ssc1p in mitochondrial thermotolerance after heat shock; able to prevent the aggregation of misfolded proteins as well as resolubilize protein aggregates	4		-0.0215786	-0.10461	0.118157	0.2455	-0.0378645	-0.0289644	-0.0730768	0.18178	-0.0501898	-1.09856	-0.0301935	0.198154	0.431017	1.08023	0.48001
YDR261C	EXG2	Exo-1,3-beta-glucanase, involved in cell wall beta-glucan assembly; may be anchored to the plasma membrane via a glycosylphosphatidylinositol (GPI) anchor	4		0.0534436	0.0726489	0.0241702	-0.153482	0.686367	-0.0585232	0.429698	0.791471	0.286412	0.832427	-0.19366	-0.139696	-0.118803	0.725116	0.027784
YDR262W	YDR262W	Putative protein of unknown function; green fluorescent protein (GFP)-fusion protein localizes to the vacuole and is induced in response to the DNA-damaging agent MMS; gene expression increases in response to Zymoliase treatment	4		0.0864019	-0.0475865	0.30033	-0.325598	-0.0441067	-0.15701	0.358695	0.0436433	0.202038	0.29907	-0.141264	-0.029304	0.491187	-0.0489995	0.131043
YDR264C	AKR1	Palmitoyl transferase involved in protein palmitoylation; acts as a negative regulator of pheromone response pathway; required for endocytosis of pheromone receptors; involved in cell shape control; contains ankyrin repeats	4		-0.0137142	-0.0212687	-0.0938375	0.138173	-0.146814	0.071011	0.0490175	-0.144786	0.207454	-0.385694	0.0612045	-0.153278	0.549006	0.0210815	0.040484
YDR266C	YDR266C	RING finger ubiquitin ligase (E3); involved in ubiquitylation and degradation of excess histones; interacts with Ubc4p and Rad53p; null mutant sensitive to hydroxyurea (HU); green fluorescent protein (GFP)-fusion protein localizes to the cytoplasm; computational analysis suggests a role as a transcription factor	4		0.0501117	0.0017719	-0.00734513	0.0311225	-0.1446	-0.0405495	-0.117899	-0.109961	-0.0344139	-0.193393	0.0242485	-0.15101	-0.150362	-0.236743	-0.0653884
YDR267C	CIA1	Component of cytosolic iron-sulfur protein assembly (CIA) machinery; acts at a late step of Fe-S cluster assembly; forms the CIA targeting complex with Cia2p and Met18p that directs Fe-S cluster incorporation into a subset of proteins involved in methionine biosynthesis, DNA replication and repair, transcription, and telomere maintenance; contains WD40 repeats; ortholog of human Ciao1 protein	4		-0.49892	-0.190524	-0.331093	0.304089	-0.162485	-0.126116	0.175226	0.123074	-0.0239183	-0.206064	-0.139748	-0.01732	-0.29659	0.168627	0.012007
YDR268W	MSW1	Mitochondrial tryptophanyl-tRNA synthetase	4		0.0754059	-0.0745077	0.184205	-0.238916	-0.0665778	-0.00518335	-0.100558	-0.341396	0.176765	-0.590516	0.0162675	0.262604	-0.184164	0.349925	0.081905
YDR270W	CCC2	Cu(+2)-transporting P-type ATPase; required for export of copper from the cytosol into an extracytosolic compartment; has similarity to human proteins involved in Menkes and Wilsons diseases; protein abundance increases in response to DNA replication stress	4		0.172421	-0.171436	-0.186578	-0.370166	-0.440434	-0.0720756	0.180651	-0.401999	-0.126539	-0.0867383
YDR272W	GLO2	Cytoplasmic glyoxalase II, catalyzes the hydrolysis of S-D-lactoylglutathione into glutathione and D-lactate	4		0.0372117	-0.220825	0.067061	-0.11223	-0.252335	0.0475002	-0.318855	-0.168721	-0.132492	-0.42682	-0.0657385	0.423667	-0.264301	-0.321136	-0.479568
YDR279W	RNH202	Ribonuclease H2 subunit, required for RNase H2 activity; related to human AGS2 that causes Aicardi-Goutieres syndrome	4	ribonuclease H2 complex	-0.0102885	-0.0900827	-0.0896215	0.0144585	0.0113983	0.0993334	-0.0032019	0.0708905	0.0175568	-0.14331	0.0982046	0.113048	0.193937	-0.188418	0.251782
YDR280W	RRP45	Exosome non-catalytic core component; involved in 3'-5' RNA processing and degradation in both the nucleus and the cytoplasm; has similarity to E. coli RNase PH and to human hRrp45p (PM/SCL-75, EXOSC9); protein abundance increases in response to DNA replication stress	4	Nuclear exosome complex, Cytoplasmic exosome complex	-0.0023152	0.029081	-0.256052	0.135361	-0.247237	0.0613961	-0.0491755	-0.235662	-0.138915	0.146911	0.0995034	0.06901	-0.322374	-0.454526	0.175143
YDR282C	YDR282C	Putative protein of unknown function; localizes to the inner mitochondrial membrane with the C terminus facing the intermembrane space; ortholog of human RMND1, mutation in which is implicated in infantile encephaloneuromyopathy and defective mitochondrial translation	4							0.0412239	0.0405086	0.0354148	0.337673	0.175786	0.139787	0.142441	-0.218895	0.422749	-0.0527726
YDR283C	GCN2	Protein kinase, phosphorylates the alpha-subunit of translation initiation factor eIF2 (Sui2p) in response to starvation; activated by uncharged tRNAs and the Gcn1p-Gcn20p complex; contributes to DNA damage checkpoint control	4		0.0179359	0.0589089	-0.0137172	-0.108412	0.257064	-0.0819836	0.154707	0.071728	0.123899	-0.0685692	0.0749277	0.011833	0.39554	0.18634	-0.055326
YDR285W	ZIP1	Transverse filament protein of the synaptonemal complex; required for normal levels of meiotic recombination and pairing between homologous chromosome during meiosis; potential Cdc28p substrate	4	Synaptonemal complex (SC)	0.0231087	-0.115617	-0.539398	0.869022	-0.051248	-0.0978397	0.695736	1.18868	0.0290848	0.46585	0.150381	-0.453807	-1.42511	0.930245	-0.828106
YDR286C	YDR286C	Putative protein of unknown function; predicted to have thiol-disulfide oxidoreductase active site	4		0.125554	-0.243924	-0.109351	-0.246246	-0.041203	0.00312385	-0.222351	0.246906	0.216712	-0.845672	0.257191	0.636188	-0.333984	0.0682235	-0.23747
YDR287W	INM2	Inositol monophosphatase, involved in biosynthesis of inositol; enzymatic activity requires magnesium ions and is inhibited by lithium and sodium ions; inm1 inm2 double mutant lacks inositol auxotrophy	4		0.169904	-0.0424593	0.42658	0.0758498	0.133727	0.0375842	0.129368	-0.127003	-0.226643	-0.0952793	-0.178146	0.091402	0.121467	0.334769	0.290205
YDR288W	NSE3	Component of the SMC5-SMC6 complex; this complex plays a key role in the removal of X-shaped DNA structures that arise between sister chromatids during DNA replication and repair; protein abundance increases in response to DNA replication stress	4	smc5p-Smc6p complex											-0.0270725	-0.290862	-0.443769	-0.0562035	0.233666
YDR289C	RTT103	Protein that interacts with exonuclease Rat1p and Rai1p and plays a role in transcription termination by RNA polymerase II, has an RPR domain (carboxy-terminal domain interacting domain); also involved in regulation of Ty1 transposition	4	RNA Degradation Complex	0.0955616	0.3929	0.19001	0.330445	0.518845	-0.0430006	0.0601699	0.187456	-0.143927	0.481092	-0.0748505	-0.424455	0.200063	-0.0147315	-0.0764872
YDR291W	HRQ1	3'-5'DNA helicase that has DNA strand annealing activity; helicase activity is stimulated by fork structure and 3'-tail length of substrates; belongs to the widely conserved RecQ family of proteins which are involved in maintaining genomic integrity; similar to the human RecQ4p implicated in Rothmund-Thomson syndrome(RTS)	4		-0.26549	0.149272	0.183523	0.153562	0.510803	-0.0759547	0.670764	0.654062	0.78267	0.655833	0.124472	-0.032938	0.2456	0.151958	0.149959
YDR292C	SRP101	Signal recognition particle (SRP) receptor alpha subunit; contain GTPase domains; involved in SRP-dependent protein targeting; interacts with the beta subunit, Srp102p	4	signal recognition particle receptor complex	0.0272061	0.0185509	0.0899718	0.137857	0.12387	-0.00591045	-0.0432676	0.118652	-0.168689	-0.0970803	-0.0117625	-0.073645	0.0994853	0.0184645	-0.0784442
YDR293C	SSD1	Translational repressor with a role in polar growth and wall integrity; regulated by Cbk1p phosphorylation to effect bud-specific translational control and localization of specific mRNAs; interacts with TOR pathway components; contains a functional N-terminal nuclear localization sequence and nucleocytoplasmic shuttling appears to be critical to Ssd1p function	4		-0.0424218	0.101156	0.149634	-0.38832	-0.0602157	0.0296209	0.143278	0.330899	0.174456	0.432957	0.121325	-0.33728	0.181608	0.377048	0.178242
YDR294C	DPL1	Dihydrosphingosine phosphate lyase, regulates intracellular levels of sphingolipid long-chain base phosphates (LCBPs), degrades phosphorylated long chain bases, prefers C16 dihydrosphingosine-l-phosphate as a substrate	4		-0.022225	0.0854709	0.138749	0.16019	0.146407	-0.0265194	0.0875588	0.656204	0.0881583	0.285275	0.0081345	-0.095324	0.598149	0.737456	0.273509
YDR295C	HDA2	Subunit of a possibly tetrameric trichostatin A-sensitive class II histone deacetylase complex containing an Hda1p homodimer and an Hda2p-Hda3p heterodimer; involved in telomere maintenance	4	histone deacetylase complex	-0.0568314	0.0394954	-0.0162162	0.0992688	-0.0369505	0.142659	0.0011105	0.159263	-0.107006	0.327885	0.127552	-0.042595	0.147605	-0.0955125	0.062488
YDR296W	MHR1	Protein involved in homologous recombination in mitochondria; required for recombination-dependent mtDNA partitioning; involved in stimulation of mitochondrial DNA replication in response to oxidative stress	4		-0.0714684	0.0667989	0.106712	0.0501818	-0.143533	0.227912	0.0741223	0.185669	0.286422	-0.710032	-0.0830205	0.480678	-0.214249	0.201445	0.015233
YDR297W	SUR2	Sphinganine C4-hydroxylase, catalyses the conversion of sphinganine to phytosphingosine in sphingolipid biosyntheis	4		-0.0568765	-0.0886627	-0.312315	-0.0707123	-0.254497	-0.0297489	-0.0228974	-0.162025	-0.0150853	0.239964	0.0020785	0.085736	0.176361	0.0989925	-0.327522
YDR298C	ATP5	Subunit 5 of the stator stalk of mitochondrial F1F0 ATP synthase, which is an evolutionarily conserved enzyme complex required for ATP synthesis; homologous to bovine subunit OSCP (oligomycin sensitivity-conferring protein); phosphorylated	4	F0/F1 ATP synthase (complex V)	-0.0280975	0.0258908	0.0469429	-0.268879	-0.380343	-0.0798957	-0.141837	-0.352399	0.144836	-1.44644	-0.0962905	-0.049361	-0.548309	0.326452	-0.223398
YDR299W	BFR2	Essential protein that is a component of 90S preribosomes; may be involved in rRNA processing; multicopy suppressor of sensitivity to Brefeldin A; expression is induced during lag phase and also by cold shock	4		-0.115627	-0.0348381	-0.111916	-0.0448052	0.0156669	-0.0181921	-0.116053	-0.201243	-0.0590123	0.110579	0.0749277	0.009406	0.0128513	-0.349109	0.15124
YDR300C	PRO1	Gamma-glutamyl kinase; catalyzes the first step in proline biosynthesis; PRO1 has a paralog, YHR033W, that arose from the whole genome duplication	4		0.0712732	-0.0470077	-0.173159	-0.0511231	-0.0145476	-0.0463436	-0.0902517	-0.00617064	0.0143308	0.2492	0.0210195	-0.347436	-0.0454425	-0.330689	-0.0577349
YDR301W	CFT1	RNA-binding subunit of the mRNA cleavage and polyadenylation factor; involved in poly(A) site recognition and required for both pre-mRNA cleavage and polyadenylation, 51% sequence similarity with mammalian AAUAA-binding subunit of CPSF	4	mRNA cleavage and polyadenylation specificity factor complex	0.160084	0.0518359	0.0225901	0.145021	0.0132807	0.0620016	0.0665406	0.185847	0.0427468	0.174836	0.124515	-0.086032	0.293842	-0.458387	-0.0943347
YDR302W	GPI11	ER membrane protein involved in a late step of glycosylphosphatidylinositol (GPI) anchor assembly; involved in the addition of phosphoethanolamine to the multiply mannosylated GPI intermediate; human PIG-Fp is a functional homolog	4		0.148679	-0.22249	-0.0356791	-0.10597	0.181683						0.235762	0.432144	0.0607526	-0.319098	0.276542
YDR303C	RSC3	Component of the RSC chromatin remodeling complex; essential gene required for maintenance of proper ploidy and regulation of ribosomal protein genes and the cell wall/stress response; highly similar to Rsc30p	4	RSC complex	0.0111953	0.116619	0.0247172	0.0413318	-0.336	0.0777207	0.0971597	-0.138009	-0.158593	-0.0584698	0.105697	0.075842	0.103587	-0.197106	0.024745
YDR304C	CPR5	Peptidyl-prolyl cis-trans isomerase (cyclophilin) of the endoplasmic reticulum, catalyzes the cis-trans isomerization of peptide bonds N-terminal to proline residues; transcriptionally induced in response to unfolded proteins in the ER	4		0.0328958	-0.237685	0.00361455	0.0975208	-0.120222	-0.0790156	0.375227	0.0725611	-0.162247	-0.396316	0.198788	0.40848	0.272218	-0.222388	0.243265
YDR305C	HNT2	Dinucleoside triphosphate hydrolase; has similarity to the tumor suppressor FHIT and belongs to the histidine triad (HIT) superfamily of nucleotide-binding proteins	4		0.0430236	0.481032	0.338068	0.77611	0.144721						-0.116644	-0.21615	-0.365046	0.0976025	0.181597
YDR306C	YDR306C	F-box protein of unknown function; interacts with Sgt1p via a Leucine-Rich Repeat (LRR) domain	4							-0.117512	-0.293281	0.492291	-0.269372	0.0196269
YDR307W	YDR307W	Putative protein mannosyltransferase similar to Pmt1p; has a potential role in protein O-glycosylation	4		0.0857902	0.123997	0.0889465	0.008536	0.104335						-0.139967	0.244377	0.264796	-0.55567	0.06075
YDR308C	SRB7	Subunit of the RNA polymerase II mediator complex; associates with core polymerase subunits to form the RNA polymerase II holoenzyme; essential for transcriptional regulation; target of the global repressor Tup1p	4	Kornberg's mediator (SRB) complex	-0.135148	0.312512	0.00850565	0.580194	0.353897	-0.00882225	-0.0138691	-0.202061	0.275158	-0.331541	-0.0162295	0.064894	-0.0310891	0.556134	0.377859
YDR310C	SUM1	Transcriptional repressor required for mitotic repression of middle sporulation-specific genes; also acts as general replication initiation factor; involved in telomere maintenance, chromatin silencing; regulated by pachytene checkpoint	4	Sum1p/Rfm1p/Hst1p complex	-0.0863074	0.104668	-0.0305547	0.0633698	0.0417406	-0.0330529	0.0653349	-0.140036	-0.0321736	-0.0010166	0.118159	-0.091393	-0.12379	-0.0998565	0.068639
YDR311W	TFB1	Subunit of TFIIH and nucleotide excision repair factor 3 complexes, required for nucleotide excision repair, target for transcriptional activators	4	transcription factor TFIIH complex, nucleotide-excision repair factor 3 complex	0.0492814	0.0363907	0.0728066	-0.0881318	0.0141592	0.00444155	-0.116481	-0.0159361	0.131862	0.356262	0.0089885	0.039444	0.0724582	-0.0545305	0.155839
YDR312W	SSF2	Protein required for ribosomal large subunit maturation, functionally redundant with Ssf1p; member of the Brix family	4		0.122879	0.0295431	0.134392	0.15887	0.103327	0.196164	0.271579	0.361734	0.188127	-0.136547	0.204417	0.123907	0.297597	-0.0027895	0.3453
YDR313C	PIB1	RING-type ubiquitin ligase of the endosomal and vacuolar membranes, binds phosphatidylinositol(3)-phosphate; contains a FYVE finger domain	4		-0.0496046	0.190455	0.127905	0.0749098	0.00918175	0.0151961	0.552293	0.222973	-0.556453	-0.808671	0.0644595	0.355461	0.0302202	0.428977	0.448682
YDR316W	OMS1	Protein integral to the mitochondrial membrane; has a conserved methyltransferase motif; multicopy suppressor of respiratory defects caused by OXA1 mutations	4		0.300609	-0.268832	0.226757	-0.253	-0.0810104	-0.170553	-0.0714781	-0.210087	0.270842	-0.455587	0.0924824	0.752204	-0.251931	0.584135	0.167657
YDR320C	SWA2	Auxilin-like protein involved in vesicular transport; clathrin-binding protein required for uncoating of clathrin-coated vesicles	4		-0.0229581	0.0975689	-0.269402	0.314348	0.020201	0.0698967	0.0501444	0.152817	0.219206	0.287684	0.0765379	-0.161894	0.231141	0.124692	0.038441
YDR321W	ASP1	Cytosolic L-asparaginase, involved in asparagine catabolism; catalyzes hydrolysis of L-asparagine to aspartic acid and ammonia, has an important role in therapy of acute lymphoblastic leukemia; synthesized constitutively	4		0.0051758	-0.111955	-0.14152	-0.32338	0.0252707	0.0208976	-0.237346	-0.00598594	-0.169653	0.0185441	-0.0336235	-0.377561	-0.230248	-0.710881	-0.121014
YDR322C-A	TIM11	Subunit e of mitochondrial F1F0-ATPase, which is a large, evolutionarily conserved enzyme complex required for ATP synthesis; essential for the dimeric and oligomeric state of ATP synthase	4	F0/F1 ATP synthase (complex V)	-0.0717304	-0.0227528	0.140376	-0.176056	-0.325463	0.00530165	-0.0969817	-0.162869	0.125248	-1.35729	-0.217786	0.27141	-1.19935	0.405251	-0.200054
YDR322W	MRPL35	Mitochondrial ribosomal protein of the large subunit	4	mitochondrial ribosomal large subunit	0.0384464	-0.0498615	0.0648869	-0.140753	-0.152822	-0.015033	-0.0462589	-0.149191	0.218463	-0.732743	-0.0726865	0.560292	-0.0631795	0.320941	-0.194653
YDR324C	UTP4	Subunit of U3-containing 90S preribosome and Small Subunit (SSU) processome complexes involved in production of 18S rRNA and assembly of small ribosomal subunit; member of t-Utp subcomplex involved with transcription of 35S rRNA transcript	4	UTP A complex	0.0678359	-0.0086377	-0.0301008	0.0760988	0.148765	0.0209764	0.0607511	0.0231116	-0.02201	0.120774	0.0812084	0.122175	0.129574	-0.343276	0.112957
YDR325W	YCG1	Subunit of the condensin complex; required for establishment and maintenance of chromosome condensation, chromosome segregation and chromatin binding of the condensin complex; required for clustering of tRNA genes at the nucleolus	4	nuclear condensin complex	0.176162	0.0896369	0.257075	0.239111	0.221208	0.0519503	-0.173968	-0.0780196	0.0134471	0.0763426	0.21878	0.096318	0.0986544	0.187018	0.193778
YDR326C	YSP2	Protein involved in programmed cell death; mutant shows resistance to cell death induced by amiodarone or intracellular acidification	4		0.0977011	0.0927079	0.186752	-0.0099745	0.0758293	-0.00589355	0.0249051	0.0305832	0.230488	-0.0065262	0.0388475	0.001182	0.17612	0.0855685	0.195779
YDR328C	SKP1	Evolutionarily conserved kinetochore protein; part of multiple protein complexes, including the SCF ubiquitin ligase complex, the CBF3 complex that binds centromeric DNA, and the RAVE complex that regulates assembly of the V-ATPase; protein abundance increases in response to DNA replication stress	4	SCF-CDC4 complex, nuclear ubiquitin ligase complex, RAVE complex, CBF3 complex	-0.0314785	0.0936999	0.47187	0.185457	0.161237	0.0186419	0.0412314	0.0562609	-0.0476632	0.0773592	-0.0485345	0.100915	0.108533	0.113277	-0.026423
YDR329C	PEX3	Peroxisomal membrane protein (PMP) required for proper localization and stability of PMPs; anchors peroxisome retention factor Inp1p at the peroxisomal membrane; interacts with Pex19p	4		0.191228	-0.0448965	0.13878	0.182999	0.126656	0.0182782	-0.260482	0.0415409	0.111708	-0.296928	-0.277254	-0.0818	0.34937	0.0767705	0.175457
YDR330W	UBX5	UBX (ubiquitin regulatory X) domain-containing protein that interacts with Cdc48p	4		0.0418771	-0.578181	0.0694032	0.626866	-0.680839	-0.122948	0.0152604	0.00022629	-0.131402	-0.133291	0.468836	0.561924	0.30122	0.892176	0.462357
YDR331W	GPI8	ER membrane glycoprotein subunit of the glycosylphosphatidylinositol transamidase complex that adds glycosylphosphatidylinositol (GPI) anchors to newly synthesized proteins; human PIG-K protein is a functional homolog	4	GPI-anchor transamidase complex						0.123386	0.0235828	0.0962176	0.0789699	-0.113414	0.0222615	0.248781	0.526255	-0.154451	0.145299
YDR333C	YDR333C	Putative protein of unknown function	4		0.073724	-0.0566691	0.196193	-0.0147717	0.0243118	-0.121823	-0.0596573	0.142602	0.0707014	0.104922	-0.0030185	0.155315	-0.017089	-0.0247855	0.232747
YDR334W	SWR1	Swi2/Snf2-related ATPase that is the structural component of the SWR1 complex, which exchanges histone variant H2AZ (Htz1p) for chromatin-bound histone H2A	4	Swr1p complex											0.0434625	0.225456	-0.0646724	-0.405868	0.033278
YDR335W	MSN5	Karyopherin involved in nuclear import and export of proteins, including import of replication protein A and export of Swi6p, Far1p, and Pho4p; required for re-export of mature tRNAs after their retrograde import from the cytoplasm	4		0.192861	0.15384	0.216589	0.264742	0.252243	0.0247607	0.274571	0.438327	0.0509162	0.375536	0.0641715	0.157529	0.598811	0.538128	0.24876
YDR337W	MRPS28	Mitochondrial ribosomal protein of the small subunit	4	mitochondrial ribosomal small subunit	-0.0292823	0.0261191	0.130692	-0.0486216	-0.229861	-0.0334214	0.132745	-0.0678794	0.0460711	-0.873332	0.141413	0.487529	-0.0541337	0.414645	0.002872
YDR339C	FCF1	Putative PINc domain nuclease required for early cleavages of 35S pre-rRNA and maturation of 18S rRNA; component of the SSU (small subunit) processome involved in 40S ribosomal subunit biogenesis; copurifies with Faf1p	4		0.0135708	0.0071841	0.0830842	-0.0860186	-0.189354	0.050478	-0.290972	-0.0514824	-0.0888841	-0.0342222	-0.0017445	0.190362	0.143378	-0.10489	0.179656
YDR341C	YDR341C	Arginyl-tRNA synthetase, proposed to be cytoplasmic but the authentic, non-tagged protein is detected in highly purified mitochondria in high-throughput studies	4		-0.0493653	-0.0027037	-0.0739954	-0.129297	0.107767	-0.0406923	0.0555544	0.0201271	0.0473951	0.277526	-0.0265755	0.026637	0.274299	-0.22384	-0.181255
YDR342C	HXT7	High-affinity glucose transporter of the major facilitator superfamily, nearly identical to Hxt6p, expressed at high basal levels relative to other HXTs, expression repressed by high glucose levels	4		-0.0819422	0.095634	-1.2217	-0.477968	-1.96822	-0.0568368	0.488057	-0.414809	-0.815345	-1.59539	-0.01837	0.499407	0.150759	0.590482	-1.00571
YDR343C	HXT6	High-affinity glucose transporter of the major facilitator superfamily, nearly identical to Hxt7p, expressed at high basal levels relative to other HXTs, repression of expression by high glucose requires SNF3	4		-0.0819422	0.095634	-1.2217	-0.477968	-1.96822	-0.0568368	0.488057	-0.414809	-0.815345	-1.59539	-0.01837	0.499407	0.150759	0.590482	-1.00571
YDR345C	HXT3	Low affinity glucose transporter of the major facilitator superfamily, expression is induced in low or high glucose conditions	4		0.0200763	-0.257052	-0.119642	-0.0542398	-0.297312	-0.0419122	0.0574191	-0.404557	0.0385737	-0.030494	0.116797	-0.588074	-0.135083	-1.0218	0.411516
YDR346C	SVF1	Protein with a potential role in cell survival pathways, required for the diauxic growth shift; expression in mammalian cells increases survival under conditions inducing apoptosis; mutant has increased aneuploidy tolerance	4		-0.0380736	0.0310459	-0.0334412	-0.0604047	0.0645282	0.00776725	0.123219	-0.243831	-0.109452	-0.0309666	-0.115789	-0.156138	0.0371727	-0.432868	-0.138356
YDR347W	MRP1	Mitochondrial ribosomal protein of the small subunit; MRP1 exhibits genetic interactions with PET122, encoding a COX3-specific translational activator, and with PET123, encoding a small subunit mitochondrial ribosomal protein	4	mitochondrial ribosomal small subunit	0.182038	-0.0622152	0.216651	0.0197131	-0.0997478	-0.0259394	-0.0436012	0.0158824	0.0962733	-0.797663	-0.0120285	0.258021	-0.12151	0.236289	-0.265669
YDR348C	YDR348C	Protein of unknown function thought to be involved in endocytosis; Pal1p physically interacts with Ede1p and is found at endocytic sites at the cell periphery during the early stages of endocytosis; green fluorescent protein (GFP)-fusion protein also localizes to the bud neck; potential Cdc28p substrate; similar to the S. pombe Pal1 protein	4		0.0267759	0.0133074	-0.111481	-0.0030639	-0.12967	-0.0598857	0.147312	-0.114103	0.124637	-0.0060645	0.0212335	-0.187477	-0.183983	-0.0442365	0.070759
YDR349C	YPS7	Putative GPI-anchored aspartic protease, member of the yapsin family of proteases involved in cell wall growth and maintenance; located in the cytoplasm and endoplasmic reticulum	4		0.0297002	0.0524049	0.0353964	-0.203297	-0.0582763	0.318407	0.107593	0.51866	0.215324	0.755807	0.0224805	0.042671	0.203714	0.15765	0.04683
YDR351W	SBE2	Protein involved in the transport of cell wall components from the Golgi to the cell surface; required for bud growth	4							0.0586919	-0.0513671	0.205886	0.272574	0.371129	0.245827	-0.059218	0.295792	0.997185	-0.06084
YDR353W	TRR1	Cytoplasmic thioredoxin reductase; key regulatory enzyme that determines the redox state of the thioredoxin system, which acts as a disulfide reductase system and protects cells against both oxidative and reductive stress; protein abundance increases in response to DNA replication stress; TRR1 has a paralog, TRR2, that arose from the whole genome duplication	4		-0.0154374	-0.0909684	-0.161426	-0.532858	-0.0204215	-0.00912175	0.100567	-0.0595927	-0.306781	-1.06789	-0.0716495	0.368951	-0.272263	-0.784127	-0.337262
YDR354W	TRP4	Anthranilate phosphoribosyl transferase of the tryptophan biosynthetic pathway, catalyzes the phosphoribosylation of anthranilate, subject to the general control system of amino acid biosynthesis	4		0.0060065	-0.0925682	-0.336643	-0.0511905	-0.173338	-0.0611762	-0.430611	-0.585161	-0.0415139	0.184127	0.108581	-0.613394	0.0776829	-0.664193	-0.106316
YDR356W	SPC110	Inner plaque spindle pole body (SPB) component, ortholog of human kendrin; involved in connecting nuclear microtubules to SPB; interacts with Tub4p-complex and calmodulin; phosphorylated by Mps1p in cell cycle-dependent manner	4	SPB components	0.0385758	0.121312	0.0909131	0.0932718	-0.0542345	0.0330341	-0.104908	-0.150408	-0.0739796	-0.281442	-0.0369935	-0.015633	-0.141583	-0.0230845	0.17253
YDR357C	YDR357C	Protein of unknown function; likely member of BLOC complex involved in endosomal cargo sorting; null mutant is sensitive to drug inducing secretion of vacuolar cargo; green fluorescent protein (GFP)-fusion protein localizes to the cytoplasm	4		0.0144639	-0.137138	-0.227138	-0.0663744	-0.0866581	-0.450628	-0.0635152	-0.354658	0.290944	0.141256
YDR358W	GGA1	Golgi-localized protein with homology to gamma-adaptin, interacts with and regulates Arf1p and Arf2p in a GTP-dependent manner in order to facilitate traffic through the late Golgi	4		-0.047024	0.0648439	0.398042	0.252007	-0.00732082	0.0912451	0.0275075	0.185984	0.151046	-0.0447515	-0.0591775	0.161107	0.174915	0.773165	0.055748
YDR359C	EAF1	Component of the NuA4 histone acetyltransferase complex; acts as a platform for assembly of NuA4 subunits into the native complex; required for initiation of pre-meiotic DNA replication, likely due to its requirement for expression of IME1	4	NuA4 histone acetyltransferase complex	-0.0190258	0.104565	-0.163579	-0.169811	-0.278698	0.0394582	0.0459076	0.0670928	0.00145175	0.137616	0.0224695	0.005464	0.0201748	-0.193773	0.058638
YDR361C	BCP1	Essential protein involved in nuclear export of Mss4p, which is a lipid kinase that generates phosphatidylinositol 4,5-biphosphate and plays a role in actin cytoskeleton organization and vesicular transport	4		-0.0656955	-0.0698367	-0.110178	0.412124	0.0663963	-0.00942535	0.0395479	0.00510816	-0.16227	-0.192409	0.168589	0.082106	0.199134	-0.382618	0.169591
YDR362C	TFC6	One of six subunits of RNA polymerase III transcription initiation factor complex (TFIIIC); part of TFIIIC TauB domain that binds BoxB promoter sites of tRNA and other genes; cooperates with Tfc3p in DNA binding; human homolog is TFIIIC-110	4	transcription factor TFIIIC complex	-0.147644	-0.0275113	0.0610897	0.0302727	-0.0317533	-0.0720417	1.02635	1.14111	-1.19981	-0.711667	0.0189865	0.005465	0.0746846	-0.0186545	0.19846
YDR363W-A	SEM1	Component of lid subcomplex of the 26S proteasome regulatory subunit; involved in mRNA export mediated by the TREX-2 complex (Sac3p-Thp1p); ortholog of human DSS1; protein abundance increases in response to DNA replication stress	4	19/22S regulator	0.12871	-0.190937	0.30019	0.317588	0.0955857	-0.182948	0.0047163	-0.108129	0.317377	0.0827954	-0.104988	-0.100956	-0.277772	-0.31431	-0.16802
YDR364C	CDC40	Pre-mRNA splicing factor, important for catalytic step II of pre-mRNA splicing and plays a role in cell cycle progression; required for DNA synthesis during mitosis and meiosis; has WD repeats	4		0.0866654	-0.0851311	-0.163503	-0.354123	-0.0585064	0.233629	0.150363	0.158978	0.125631	0.295962	-0.0609475	-0.363688	-0.192672	-0.286334	0.026485
YDR365C	ESF1	Nucleolar protein involved in pre-rRNA processing; depletion causes severely decreased 18S rRNA levels	4		-0.0180736	-0.139294	-0.143176	-0.201115	-0.0139732	0.0152964	-0.16304	0.0753931	-0.0598502	0.106193	-0.0557105	0.022782	0.101054	-0.443323	-0.172648
YDR367W	YDR367W	Component of inositol phosphorylceramide (IPC) synthase; forms a complex with Aur1p and regulates its activity; required for IPC synthase complex localization to the Golgi; post-translationally processed by Kex2p; KEI1 is an essential gene	4		-0.0550133	-0.0203224	-0.140308	0.29172	0.0705656	0.29275	0.672013	0.354911	0.247793	0.369704
YDR368W	YPR1	NADPH-dependent aldo-keto reductase; reduces multiple substrates including 2-methylbutyraldehyde and D,L-glyceraldehyde, expression is induced by osmotic and oxidative stress; functionally redundant with other aldo-keto reductases; protein abundance increases in response to DNA replication stress	4		-0.0201102	0.402063	0.288041	-0.167559	0.306031	0.0325721	0.626463	0.478419	0.231176	0.227359	0.0229665	0.690837	-0.0998291	-0.0112355	-0.380215
YDR369C	XRS2	Protein required for DNA repair; component of the Mre11 complex, which is involved in double strand breaks, meiotic recombination, telomere maintenance, and checkpoint signaling	4	MRX complex	0.186432	0.0318631	0.0429544	-0.351832	0.253133	-0.115301	-0.0284362	0.211237	0.131327	0.295208	-0.114397	-0.380915	-0.158663	-0.159232	-0.143249
YDR371W	CTS2	Putative chitinase, functionally complements A. gossypii cts2 mutant sporulation defect	4							0.00605295	0.165067	0.494913	0.220552	0.471497	0.268402	-0.130742	0.557295	0.363532	-0.187449
YDR372C	VPS74	Golgi phosphatidylinositol-4-kinase effector and PtdIns4P sensor; interacts with the cytosolic domains of cis and medial glycosyltransferases, and in the PtdIns4P-bound state mediates the targeting of these enzymes to the Golgi; interacts with the catalytic domain of Sac1p, the major cellular PtdIns4P phosphatase, to direct dephosphosphorylation of the Golgi pool of PtdIns4P; tetramerization requ…	4		0.0419487	0.13831	0.145337	-0.0732099	0.159594	-0.0523544	-0.0651295	0.00690266	-0.1018	0.229591	-0.165137	-0.369348	0.0545078	-0.188672	0.066466
YDR373W	FRQ1	N-myristoylated calcium-binding protein that may have a role in intracellular signaling through its regulation of the phosphatidylinositol 4-kinase Pik1p; member of the recoverin/frequenin branch of the EF-hand superfamily	4		0.147279	0.0945899	0.229733	0.283445	0.282425	0.165209	0.138942	0.218039	-0.0888362	0.0959215
YDR375C	BCS1	Protein translocase and chaperone required for Complex III assembly; member of the AAA ATPase family; forms a homo-oligomeric complex in the mitochondrial inner membrane that translocates the C-terminal domain of Rip1p from the matrix across the inner membrane, and then delivers it to an assembly intermediate of respiratory Complex III in an ATP-dependent reaction; also required for assembly of t…	4		-0.0032787	-0.111148	0.150188	-0.580664	-0.0618904	0.0295186	0.0261528	-0.101285	0.346991	-0.616935	-0.13546	0.238092	-0.0260424	0.326831	-0.465688
YDR376W	ARH1	Oxidoreductase of the mitochondrial inner membrane, involved in cytoplasmic and mitochondrial iron homeostasis and required for activity of Fe-S cluster-containing enzymes; one of the few mitochondrial proteins essential for viability	4		0.0563752	-0.0667504	0.331931	-0.248919	0.131511	0.00689485	-0.0024033	0.1932	0.0150414	-0.234787	0.0210045	0.156407	0.105182	0.545584	0.076257
YDR377W	ATP17	Subunit f of the F0 sector of mitochondrial F1F0 ATP synthase, which is a large, evolutionarily conserved enzyme complex required for ATP synthesis	4	F0/F1 ATP synthase (complex V)	0.0525473	-0.0475002	0.203097	-0.232026	-0.0772041	-0.0584987	-0.0933927	-0.132452	0.194095	-1.28477	-0.0574515	0.094002	-0.342162	0.442977	-0.171789
YDR378C	LSM6	Lsm (Like Sm) protein; part of heteroheptameric complexes (Lsm2p-7p and either Lsm1p or 8p): cytoplasmic Lsm1p complex involved in mRNA decay; nuclear Lsm8p complex part of U6 snRNP and possibly involved in processing tRNA, snoRNA, and rRNA	4	U6 snRNP complex, U4/U6 x U5 tri-snRNP complex	-0.0427673	0.0572579	-0.109449	0.246019	-0.165706	0.264202	0.0121866	-0.127059	0.15895	0.388071	0.316638	0.087472	-0.224987	-0.447921	0.251895
YDR379C-A	YDR379C-A	Protein involved in the assembly of the mitochondrial succinate dehydrogenase complex; mutations in human ortholog SDHAF1 are associated with infantile leukoencephalopathy	4							-0.0427265	0.0876863	0.00755106	1.3089	-0.758309	0.272417	0.714405	0.10078	0.673435	0.345566
YDR379W	RGA2	GTPase-activating protein for the polarity-establishment protein Cdc42p; implicated in control of septin organization, pheromone response, and haploid invasive growth; regulated by Pho85p and Cdc28p	4		0.0240279	-0.0109502	0.395918	-0.139809	-0.07769	-0.0134703	-0.104461	-0.150065	-0.121198	-0.0730977	0.155049	-0.271368	0.0690884	0.382939	-0.023603
YDR380W	ARO10	Phenylpyruvate decarboxylase, catalyzes decarboxylation of phenylpyruvate to phenylacetaldehyde, which is the first specific step in the Ehrlich pathway	4		0.0122206	0.0283048	1.66814	-0.685109	-0.0674433	-0.00857185	-0.206018	0.575273	0.105127	-1.6295	-0.0468735	0.10852	0.0153893	0.252199	0.878792
YDR381C-A	YDR381C-A	Protein of unknown function, localized to the mitochondrial outer membrane	4		0.0584634	-0.412186	-0.343707	0.241911	-0.0591663	0.230199	-0.016241	0.654118	0.103723	-0.241011	-0.12591	0.549082	-0.353555	0.807965	0.042671
YDR381W	YRA1	RNA binding protein required for export of poly(A)+ mRNA from the nucleus; proposed to couple mRNA export with 3' end processing via its interactions with Mex67p and Pcf11p; functionally redundant with Yra2p, another REF family member	4	transcription export complex	0.030376	-0.0623311	-0.159739	-0.0109187	-0.248791	0.0182601	-0.0091018	0.00239334	-0.125039	0.0998998	0.0139295	0.034582	-0.15908	-0.233814	-0.007829
YDR382W	RPP2B	Ribosomal protein P2 beta, a component of the ribosomal stalk, which is involved in the interaction between translational elongation factors and the ribosome; regulates the accumulation of P1 (Rpp1Ap and Rpp1Bp) in the cytoplasm	4	cytoplasmic ribosomal large subunit	0.0012965	-0.0805555	-0.231468	-0.275418	-0.367475	-0.120125	-0.157611	-0.24661	0.00381035	-0.911414	-0.112835	-0.372917	-0.538778	-0.355036	-0.278689
YDR383C	NKP1	Central kinetochore protein and subunit of the Ctf19 complex; mutants have elevated rates of chromosome loss; orthologous to fission yeast kinetochore protein fta4	4		0.142551	-0.0215067	0.225416	0.3462	-0.137016						0.144043	0.159596	0.0175161	0.129597	0.1745
YDR385W	EFT2	Elongation factor 2 (EF-2), also encoded by EFT1; catalyzes ribosomal translocation during protein synthesis; contains diphthamide, the unique posttranslationally modified histidine residue specifically ADP-ribosylated by diphtheria toxin	4		0.00352	-0.062439	-0.145313	-0.202226	-0.171809	-0.0482429	-0.0336478	-0.253002	-0.0632581	-0.179292	0.009872	-0.205472	-0.110749	-0.109512	-0.282101
YDR388W	RVS167	Actin-associated protein with roles in endocytosis and exocytosis; interacts with Rvs161p to regulate actin cytoskeleton, endocytosis, and viability following starvation or osmotic stress; recruited to bud tips by Gyl1p and Gyp5p during polarized growth; homolog of mammalian amphiphysin	4	Rvs161p/Rvs167p complex	0.0534863	0.142389	0.232244	0.29406	0.162891	0.0406375	0.187811	0.267845	0.0906567	0.155172	0.0420365	0.122384	0.194634	0.5294	0.309351
YDR389W	SAC7	GTPase activating protein (GAP) for Rho1p, involved in signaling to the actin cytoskeleton, null mutations suppress tor2 mutations and temperature sensitive mutations in actin; potential Cdc28p substrate	4		0.268795	0.15074	0.356911	0.370232	0.207182						0.10668	0.054136	0.0566584	0.122737	0.463461
YDR390C	UBA2	Subunit of a heterodimeric nuclear SUMO activating enzyme (E1) with Aos1p; activates Smt3p (SUMO) before its conjugation to proteins (sumoylation), which may play a role in protein targeting; essential for viability	4	Uba2p/Aos1p complex	-0.0787154	0.014554	-0.176446	0.12444	-0.152387	-0.00249705	0.0906879	0.0700389	-0.164268	0.0043174	0.118016	0.160651	0.121256	0.110142	0.149998
YDR392W	SPT3	Subunit of the SAGA and SAGA-like transcriptional regulatory complexes, interacts with Spt15p to activate transcription of some RNA polymerase II-dependent genes, also functions to inhibit transcription at some promoters	4	SAGA complex, SLIK (SAGA-like) complex											0.0145555	0.113324	0.191493	-0.0626945	-0.034171
YDR393W	SHE9	Mitochondrial inner membrane protein required for normal mitochondrial morphology, may be involved in fission of the inner membrane; forms a homo-oligomeric complex	4		0.147254	0.0027726	0.132158	-0.197276	-0.171112						-0.0905135	0.443987	-0.814244	0.436441	-0.467331
YDR394W	RPT3	One of six ATPases of the 19S regulatory particle of the 26S proteasome involved in the degradation of ubiquitinated substrates; substrate of N-acetyltransferase B	4	19/22S regulator	0.000837	-0.0027889	0.0845108	-0.0509113	-0.0111081	0.00690225	0.0516223	0.0686449	-0.132974	0.243677	-0.0485715	0.207969	0.220506	-0.0069985	0.288119
YDR395W	SXM1	Nuclear transport factor (karyopherin) involved in protein transport between the cytoplasm and nucleoplasm; similar to Nmd5p, Cse1p, Lph2p, and the human cellular apoptosis susceptibility protein, CAS1	4		-0.0746994	-0.0439911	-0.369644	-0.0759843	-0.00920131	-0.0391229	-0.0078902	0.041281	-0.151751	0.31052	0.0096555	-0.100135	-0.0140557	-0.33123	-0.143232
YDR397C	NCB2	Subunit of a heterodimeric NC2 transcription regulator complex with Bur6p; complex binds to TBP and can repress transcription by preventing preinitiation complex assembly or stimulate activated transcription; homologous to human NC2beta	4	NC2 complex	-0.0490534	0.213038	-0.161723	0.545939	-0.143379	0.242282	-0.156795	-0.221611	-0.438126	-0.347507	0.13995	-0.381786	-0.321917	-0.0877445	-0.0969594
YDR398W	UTP5	Subunit of U3-containing Small Subunit (SSU) processome complex involved in production of 18S rRNA and assembly of small ribosomal subunit	4		-0.17189	-0.0117219	-0.17194	-0.0489068	-0.00711897	-0.10639	-0.0313263	-0.133261	-0.12779	0.115798	0.0428245	0.064006	-0.0966841	-0.415567	0.084766
YDR399W	HPT1	Dimeric hypoxanthine-guanine phosphoribosyltransferase, catalyzes the transfer of the phosphoribosyl portion of 5-phosphoribosyl-alpha-1-pyrophosphate to a purine base (either guanine or hypoxanthine) to form pyrophosphate and a purine nucleotide (either guanosine monophosphate or inosine monophosphate); mutations in the human homolog HPRT1 can cause Lesch-Nyhan syndrome and Kelley-Seegmiller syn…	4		0.312569	0.598799	0.328463	0.0252956	0.901028	-0.0601399	0.722423	-0.221576	0.397637	-0.123303	-0.0938625	0.62694	-0.142849	-0.375485	-0.628081
YDR400W	URH1	Uridine nucleosidase (uridine-cytidine N-ribohydrolase), cleaves N-glycosidic bonds in nucleosides; involved in the pyrimidine salvage and nicotinamide riboside salvage pathways	4												-0.0660725	0.43908	0.0789781	0.610729	0.243836
YDR404C	RPB7	RNA polymerase II subunit B16; forms two subunit dissociable complex with Rpb4p; involved in recruitment of 3'-end processing factors to transcribing RNA polymerase II complex and in export of mRNA to cytoplasm under stress conditions; also involved in translation initiation	4	DNA-directed RNA polymerase II complex	-0.0831064	0.112434	0.0209584	0.245862	0.0767028	0.0741197	-0.0469964	0.201565	-0.137545	0.0925893
YDR405W	MRP20	Mitochondrial ribosomal protein of the large subunit	4	mitochondrial ribosomal large subunit	0.026532	-0.0866283	0.305519	0.295086	-0.0674578	0.0537409	0.0824172	-0.150845	0.441119	-0.205159	0.12883	0.305524	-0.16821	0.834326	-0.041822
YDR406W	PDR15	Plasma membrane ATP binding cassette (ABC) transporter, multidrug transporter and general stress response factor implicated in cellular detoxification; regulated by Pdr1p, Pdr3p and Pdr8p; promoter contains a PDR responsive element	4		0.020843	-0.146172	-0.173488	0.0618208	-0.388025	-0.162428	0.0602198	0.0663785	0.00161535	0.0308013	0.338322	-0.718988	0.564441	0.0555585	-0.0899351
YDR407C	TRS120	One of 10 subunits of the transport protein particle (TRAPP) complex of the cis-Golgi which mediates vesicle docking and fusion; involved in endoplasmic reticulum (ER) to Golgi membrane traffic	4	TRAPP complex	0.347373	-0.0438769	0.21643	-0.463189	-0.124199	-0.0791437	0.145676	0.104377	0.208999	0.0976998	-0.113489	0.003548	-0.0881021	0.135713	-0.0651753
YDR408C	ADE8	Phosphoribosyl-glycinamide transformylase, catalyzes a step in the 'de novo' purine nucleotide biosynthetic pathway	4		0.0765541	-0.0724643	0.0752804	-0.126265	-0.0484724	0.0540457	0.183911	0.12964	1.0666	-0.656402	0.0659925	0.31233	0.431593	-0.319416	0.327935
YDR409W	SIZ1	SUMO/Smt3 ligase that promotes the attachment of sumo (Smt3p; small ubiquitin-related modifier) to proteins; binds Ubc9p and may bind septins; specifically required for sumoylation of septins in vivo; localized to the septin ring	4							0.125845	0.0254319	0.120425	0.174833	0.177085
YDR412W	RRP17	Component of the pre-60S pre-ribosomal particle; required for cell viability under standard (aerobic) conditions but not under anaerobic conditions; exonuclease required for 5&#8242; end processing of pre-60S ribosomal RNA	4		-0.0129786	-0.0660248	-0.0788651	0.183921	0.0339221	0.166522	-0.0166359	0.124848	0.031344	0.079451	-0.0505995	0.139737	-0.161551	-0.0850665	-0.160735
YDR416W	SYF1	Member of the NineTeen Complex (NTC) that contains Prp19p and stabilizes U6 snRNA in catalytic forms of the spliceosome containing U2, U5, and U6 snRNAs; null mutant has splicing defect and arrests in G2/M; homologs in human and C. elegans	4	Prp19-associated complex	0.14969	0.0860609	0.00347985	0.249643	0.0655705	-0.129516	-0.0546144	-0.0806252	-0.0165947	-0.0323028	0.121103	0.062205	-0.140248	0.17609	0.036442
YDR418W	RPL12B	Ribosomal 60S subunit protein L12B; rpl12a rpl12b double mutant exhibits slow growth and slow translation; homologous to mammalian ribosomal protein L12 and bacterial L11; RPL12B has a paralog, RPL12A, that arose from the whole genome duplication	4	cytoplasmic ribosomal large subunit	0.0016482	-0.167557	-0.341803	-0.321706	-0.315934	-0.0449749	-0.170333	-0.385192	-0.118895	-0.232346	0.019133	-0.525417	-0.43375	-0.819067	-0.364211
YDR419W	RAD30	DNA polymerase eta, involved in translesion synthesis during post-replication repair; catalyzes the synthesis of DNA opposite cyclobutane pyrimidine dimers and other lesions; mutations in human pol eta are responsible for XPV	4		0.179952	0.162538	0.533625	0.678304	0.48348	-0.160154	0.0746346	0.0279631	0.316381	-0.468365	0.28561	0.150703	0.512684	-0.464975	-0.159648
YDR422C	SIP1	Alternate beta-subunit of the Snf1p kinase complex, may confer substrate specificity; vacuolar protein containing KIS (Kinase-Interacting Sequence) and ASC (Association with Snf1 kinase Complex) domains involved in protein interactions	4	Snf1p/Snf4p/Sip1p complex	-0.176145	-0.261992	-0.0679526	-0.677637	-0.283404	-0.108841	-0.18078	-0.174021	-0.119148	-0.304226	-0.0781265	-0.004817	-0.217408	0.0251815	-0.163823
YDR423C	CAD1	AP-1-like basic leucine zipper (bZIP) transcriptional activator; involved in stress responses, iron metabolism, and pleiotropic drug resistance; controls a set of genes involved in stabilizing proteins; binds consensus sequence TTACTAA; CAD1 has a paralog, YAP1, that arose from the whole genome duplication	4		0.157873	0.168565	0.359558	-0.0331169	0.063523	0.111635	-0.239778	-0.102135	-0.147477	0.104448	0.105063	-0.046039	0.221515	-0.0029415	0.540208
YDR424C	DYN2	Cytoplasmic light chain dynein, microtubule motor protein; proposed to be involved in the assembly of the nuclear pore complex	4	cytoplasmic dynein complex	0.0685117	-0.0821681	-0.123332	0.281809	0.107308	0.0625476	-0.143485	0.0317687	0.170861	0.186721	-0.0626505	-0.276887	-0.410286	-0.249728	-0.137801
YDR425W	SNX41	Sorting nexin, involved in the retrieval of late-Golgi SNAREs from the post-Golgi endosome to the trans-Golgi network; interacts with Snx4p	4	Atg20p/Snx4p/Snx41p complex	0.0249127	-0.0307816	0.326645	-0.33428	0.186633	0.0864094	-0.0095932	0.20768	-0.17977	0.080238	0.139171	0.195735	0.277226	0.340304	-0.0732864
YDR427W	RPN9	Non-ATPase regulatory subunit of the 26S proteasome; has similarity to putative proteasomal subunits in other species; null mutant is temperature sensitive and exhibits cell cycle and proteasome assembly defects; protein abundance increases in response to DNA replication stress	4	19/22S regulator	-0.0523113	-0.024956	0.28358	0.16017	0.22398	0.0140143	0.136437	0.474662	0.0241225	0.335343	-0.112279	0.062586	0.363942	0.329205	0.084042
YDR428C	BNA7	Formylkynurenine formamidase, involved in the de novo biosynthesis of NAD from tryptophan via kynurenine	4		-0.126707	0.988126	0.425748	1.19735	1.31572						-0.0210155	-0.42615	-0.165523	-0.383141	0.335095
YDR429C	TIF35	eIF3g subunit of the core complex of translation initiation factor 3 (eIF3), which is essential for translation; stimulates resumption of ribosomal scanning during translation reinitiation	4	eIF3	0.0307333	-0.125994	-0.201784	-0.27056	-0.42636	-0.0103772	-0.156642	-0.423033	-0.192411	-0.122036	0.0671485	-0.20118	-0.19998	-0.929831	-0.297257
YDR430C	CYM1	Lysine-specific metalloprotease of the mitochondrial intermembrane space, member of the pitrilysin family; degrades proteins and presequence peptides cleaved from imported proteins; required for normal mitochondrial morphology	4		0.0099941	0.0155241	0.159475	-0.146221	0.0310773	-0.0534467	0.0628603	-0.0834902	0.256269	-0.315217	0.0073195	0.503672	0.0440396	0.278654	-0.344944
YDR432W	NPL3	RNA-binding protein; promotes elongation, regulates termination, and carries poly(A) mRNA from nucleus to cytoplasm; has a role in repressing translation initiation by binding eIF4G; required for pre-mRNA splicing; dissociation from mRNAs promoted by Mtr10p; phosphorylated by Sky1p in the cytoplasm; protein abundance increases in response to DNA replication stress	4		0.0042402	-0.0871148	-0.0375233	-0.177915	-0.208507	-0.0945896	-0.0995467	-0.350861	-0.11208	-0.0470774	-0.0087995	-0.043206	-0.323358	-0.417241	-0.229108
YDR434W	GPI17	Transmembrane protein subunit of the glycosylphosphatidylinositol transamidase complex that adds GPIs to newly synthesized proteins; human PIG-S homolog	4	GPI-anchor transamidase complex						-0.101773	0.299947	0.380221	-0.255316	0.0405166	-0.0691085	-0.031583	0.19639	0.516091	0.252
YDR435C	PPM1	Carboxyl methyltransferase, methylates the C terminus of the protein phosphatase 2A catalytic subunit (Pph21p or Pph22p), which is important for complex formation with regulatory subunits	4		-0.112527	0.201318	0.0167064	0.820362	-0.0449708						0.0890785	0.384045	0.236533	0.834766	0.501408
YDR439W	LRS4	Nucleolar protein that forms a complex with Csm1p, and then Mam1p at kinetochores during meiosis I to mediate accurate homolog segregation; required for condensin recruitment to the replication fork barrier site and rDNA repeat segregation	4	Csm1p/Lrs4p complex, monopolin complex	-0.0161167	0.0081811	0.0425507	0.327855	-0.0544565	0.0976	-0.129758	0.0852486	0.103658	0.370619	-0.0702135	-0.349416	-0.062645	0.124439	0.160701
YDR440W	DOT1	Nucleosomal histone H3-Lys79 methylase; methylation is required for telomeric silencing, meiotic checkpoint control, and DNA damage response	4		-0.169729	-0.0915385	-0.101253	0.027732	0.378494	-0.0797787	-0.0964787	-0.345734	-0.054789	-0.0816373	0.100651	0.026321	0.20145	0.0713495	0.200902
YDR443C	SSN2	Subunit of the RNA polymerase II mediator complex; associates with core polymerase subunits to form the RNA polymerase II holoenzyme; required for stable association of Srb10p-Srb11p kinase; essential for transcriptional regulation	4	Kornberg's mediator (SRB) complex	0.052348	0.326201	0.246805	-0.0705986	0.289705	0.209867	-0.0893617	0.0248919	0.176013	0.178046	0.0179005	0.112256	0.49993	0.700425	0.190143
YDR444W	YDR444W	Putative protein of unknown function	4												0.325721	0.063073	0.278318	0.423834	0.360036
YDR447C	RPS17B	Ribosomal protein 51 (rp51) of the small (40s) subunit; homologous to mammalian ribosomal protein S17, no bacterial homolog; RPS17B has a paralog, RPS17A, that arose from the whole genome duplication; protein abundance increases in response to DNA replication stress	4	cytoplasmic ribosomal small subunit	-0.0328602	-0.169037	-0.225241	-0.252717	-0.285551	-0.0367741	-0.0568726	-0.139217	0.0504532	-0.0983081	-0.049514	-0.4917	-0.291366	-0.619141	-0.424983
YDR448W	ADA2	Transcription coactivator, component of the ADA and SAGA transcriptional adaptor/HAT (histone acetyltransferase) complexes	4	Ada2p/Gcn5p/Ada3 transcription activator complex, SAGA complex, SLIK (SAGA-like) complex	0.0903601	0.016023	0.0557841	0.0472148	-0.179739	0.134371	-0.0516284	-0.0891926	-0.0953612	0.0920682	0.104187	-0.092755	-0.0678077	0.0330965	0.195627
YDR449C	UTP6	Nucleolar protein, component of the small subunit (SSU) processome containing the U3 snoRNA that is involved in processing of pre-18S rRNA	4	UTP B complex	-0.0292763	0.0429587	0.135856	0.229654	0.156637	-0.036763	0.0647992	0.364515	0.21295	0.0464312	0.0422435	0.109452	0.1003	-0.0919845	0.27227
YDR450W	RPS18A	Protein component of the small (40S) ribosomal subunit; homologous to mammalian ribosomal protein S18 and bacterial S13; RPS18A has a paralog, RPS18B, that arose from the whole genome duplication; protein abundance increases in response to DNA replication stress	4	cytoplasmic ribosomal small subunit	0.0097864	-0.0169051	-0.124751	-0.173723	-0.0524199	-0.0375958	0.0395914	-0.0587625	0.0228838	-0.0572977	0.005666	-0.413532	-0.156754	-0.461879	-0.369627
YDR452W	PPN1	Vacuolar endopolyphosphatase with a role in phosphate metabolism; functions as a homodimer	4		0.202593	0.156908	0.41964	0.773136	0.13801	0.089708	0.109197	0.292491	-0.311464	-0.202547	-0.0008235	0.067958	0.0501926	0.492063	0.073373
YDR453C	TSA2	Stress inducible cytoplasmic thioredoxin peroxidase; cooperates with Tsa1p in the removal of reactive oxygen, nitrogen and sulfur species using thioredoxin as hydrogen donor; deletion enhances the mutator phenotype of tsa1 mutants; protein abundance increases in response to DNA replication stress	4		0.0396402	-0.204646	0.0954606	-0.670612	0.322615						-0.110478	-0.455494	-0.0649165	-0.174184	-0.972238
YDR454C	GUK1	Guanylate kinase, converts GMP to GDP; required for growth and mannose outer chain elongation of cell wall N-linked glycoproteins	4		0.0288146	0.279162	0.224067	-0.197798	0.00800825	-0.00876555	0.380821	0.458312	0.69916	0.0348932	0.162704	0.029509	-0.0753731	-0.162935	-0.39747
YDR457W	TOM1	E3 ubiquitin ligase of the hect-domain class; has a role in mRNA export from the nucleus and may regulate transcriptional coactivators; involved in degradation of excess histones; interacts with Dia2p and is required for Dia2p degradation	4		0.115019	0.0547199	0.0731471	-0.074702	0.264624	0.0169894	0.0511385	0.154805	0.0214067	0.0303379	-0.103567	0.086077	-0.200767	0.175652	-0.014327
YDR458C	HEH2	Inner nuclear membrane (INM) protein; contains helix-extension-helix (HEH) motif, nuclear localization signal sequence; targeting to the INM requires the Srp1p-Kap95p karyopherins and the Ran cycle	4		0.0610805	-0.0126854	-0.0282493	0.0713648	-0.268715	0.149316	-0.123577	-0.0907631	0.0168555	0.0697445	-0.0709995	0.075919	-0.0658148	-0.196748	0.064554
YDR460W	TFB3	Subunit of TFIIH and nucleotide excision repair factor 3 complexes, involved in transcription initiation, required for nucleotide excision repair; ring finger protein similar to mammalian CAK and TFIIH subunit	4	transcription factor TFIIH complex	0.0387051	0.0002278	0.0429126	0.0299617	-0.0514487	0.0733498	-0.208412	-0.0445452	-0.0630716	0.262293	0.0454745	-0.032789	-0.122376	-0.167194	0.236001
YDR461C-A	YDR461C-A	Putative protein of unknown function	4												0.0868717	-0.271987	0.224085	0.0792955	0.473468
YDR462W	MRPL28	Mitochondrial ribosomal protein of the large subunit; protein abundance increases in response to DNA replication stress	4	mitochondrial ribosomal large subunit	0.17885	-0.22136	0.120929	-0.368268	0.0554729	0.0827039	0.201461	-0.142342	0.323599	-0.616755	-0.0086275	0.632278	0.0372873	0.312484	0.275069
YDR463W	STP1	Transcription factor; undergoes proteolytic processing by SPS (Ssy1p-Ptr3p-Ssy5p)-sensor component Ssy5p in response to extracellular amino acids; activates transcription of amino acid permease genes and may have a role in tRNA processing; STP1 has a paralog, STP2, that arose from the whole genome duplication	4							-0.0909647	-0.239257	-0.495484	-0.206582	-0.388663
YDR464W	SPP41	Protein involved in negative regulation of expression of spliceosome components PRP4 and PRP3	4		-0.138465	0.0749369	-0.0863959	-0.222828	-0.133368	0.00291145	-0.0596512	0.27361	0.166651	0.113232	0.0520765	0.261198	-0.238123	-0.0247845	0.201815
YDR465C	RMT2	Arginine N5 methyltransferase; methylates ribosomal protein Rpl12 (L12) on Arg67	4		0.0344457	0.130993	0.113248	0.452081	0.562174	0.029422	0.268519	0.267024	-0.203906	-0.0583792	-0.112899	0.554879	0.1622	-0.0959925	0.046166
YDR466W	PKH3	Protein kinase with similarity to mammalian phosphoinositide-dependent kinase 1 (PDK1) and yeast Pkh1p and Pkh2p, two redundant upstream activators of Pkc1p; identified as a multicopy suppressor of a pkh1 pkh2 double mutant	4		-0.0082517	-0.0207037	0.043191	0.126412	0.0659679	0.197792	-0.120385	0.121332	-0.0482872	-0.0021851	0.0438945	0.125831	-0.115507	0.301664	-0.139846
YDR468C	TLG1	Essential t-SNARE that forms a complex with Tlg2p and Vti1p and mediates fusion of endosome-derived vesicles with the late Golgi; binds the docking complex VFT (Vps fifty-three) through interaction with Vps51p	4		-0.0812734	-0.0847629	0.0703457	0.0064315	-0.143779	0.118469	0.0793342	0.0616963	0.108229	-0.0936593	0.0962871	-0.134182	-0.0179339	0.548263	-0.030352
YDR469W	SDC1	Subunit of the COMPASS (Set1C) complex, which methylates lysine 4 of histone H3 and is required in chromatin silencing at telomeres; contains a Dpy-30 domain that mediates interaction with Bre2p; similar to C. elegans and human DPY-30	4	COMPASS complex	0.0137842	-0.129399	-0.0157349	-0.108769	-0.195838	-0.0843027	-0.12618	-0.239722	0.0399706	0.206711	0.0540565	-0.102146	-0.285908	0.225505	-0.0626909
YDR470C	UGO1	Outer membrane component of the mitochondrial fusion machinery; binds directly to Fzo1p and Mgm1p and thus links these two GTPases during mitochondrial fusion; involved in fusion of both the outer and inner membranes; facilitates dimerization of Fzo1p during fusion; import into the outer membrane is mediated by Tom70p and Mim1p; has similarity to carrier proteins but is not likely to function as …	4	Mgm1p/Ugo1p/Fzo1p complex	0.0100208	0.125478	0.0130596	-0.263714	0.414988	-0.0200343	0.231173	0.24865	-0.106925	0.265274	0.116887	-0.121018	0.0014299	0.446223	-0.242225
YDR471W	RPL27B	Ribosomal 60S subunit protein L27B; homologous to mammalian ribosomal protein L27, no bacterial homolog; RPL27B has a paralog, RPL27A, that arose from the whole genome duplication	4	cytoplasmic ribosomal large subunit	-0.0154263	-0.0859205	-0.190552	-0.242118	-0.151922	0.0036167	-0.0554176	-0.192223	0.0201393	-0.150719	0.026957	-0.359544	-0.265943	-0.654077	-0.338396
YDR472W	TRS31	One of 10 subunits of the transport protein particle (TRAPP) complex of the cis-Golgi which mediates vesicle docking and fusion; involved in endoplasmic reticulum (ER) to Golgi membrane traffic	4	TRAPP complex	0.250848	0.183323	0.244374	0.185202	0.108386	0.0148648	-0.104485	-0.0289338	-0.166748	-0.168911	-0.0171865	0.283146	-0.263088	-0.189232	-0.113083
YDR473C	PRP3	Splicing factor, component of the U4/U6-U5 snRNP complex	4	U4/U6 x U5 tri-snRNP complex	0.154141	0.0876739	0.151262	0.315323	0.1844	0.263196	-0.0287562	-0.0126997	-0.0762251	0.405003	-0.0746345	-0.103331	-0.0115541	0.113741	0.228551
YDR475C	JIP4	Protein of unknown function; previously annotated as two separate ORFs, YDR474C and YDR475C, which were merged as a result of corrections to the systematic reference sequence	4		0.115936	0.326368	0.028716	0.0321422	-0.0202072	-0.0315795	-0.128414	-0.188508	0.103955	-0.0394432	-0.227276	0.103599	-0.205417	0.555892	0.272381
YDR476C	YDR476C	Putative protein of unknown function; green fluorescent protein (GFP)-fusion protein localizes to the endoplasmic reticulum; YDR476C is not an essential gene	4		-0.0774504	-0.231637	0.0703047	-0.149103	-0.095417	-0.109422	0.165908	0.074237	0.182137	-0.0497587	-0.0663425	-0.357638	0.326217	-0.368727	-0.029674
YDR477W	SNF1	AMP-activated serine/threonine protein kinase; found in a complex containing Snf4p and members of the Sip1p/Sip2p/Gal83p family; required for transcription of glucose-repressed genes, thermotolerance, sporulation, and peroxisome biogenesis; involved in regulation of the nucleocytoplasmic shuttling of Hxk2p	4	Snf1p/Snf4p/Sip1p complex, Snf1p/Snf4p/Gal83p complex, Snf1p/Snf4p/Sip2p complex	-0.138786	-0.124694	0.064366	0.135841	-0.146533	0.0763165	0.0226071	0.0247495	0.0773462	-0.115284	-0.20023	0.126183	0.22802	0.281387	-0.020036
YDR479C	PEX29	Peroxisomal integral membrane peroxin, involved in the regulation of peroxisomal size, number and distribution; genetic interactions suggest that Pex28p and Pex29p act at steps upstream of those mediated by Pex30p, Pex31p, and Pex32p	4							-0.312736	0.0154415	0.211	0.270708	0.0095359	0.334807	0.186463	0.300468	0.421638	0.063679
YDR480W	DIG2	MAP kinase-responsive inhibitor of the Ste12p transcription factor, involved in the regulation of mating-specific genes and the invasive growth pathway; related regulators Dig1p and Dig2p bind to Ste12p	4	Dig1p/Ste12p/Dig2p complex	-0.0576023	-0.034667	0.00025805	0.277516	-0.295734	-0.0160047	-0.177269	-0.214594	0.157073	-0.0525387	-0.204329	-0.183737	-0.298164	-0.0267385	-0.186275
YDR481C	PHO8	Repressible vacuolar alkaline phosphatase; regulated by levels of Pi and by Pho4p, Pho9p, Pho80p, Pho81p and Pho85p; dephosphorylates phosphotyrosyl peptides; contributes to NAD+ metabolism by producing nicotinamide riboside from NMN	4		0.0492074	-0.255236	-0.367771	-0.357038	-0.399807	-0.0775277	-0.514014	-0.721597	-0.260361	-0.589802	0.068638	-0.997975	-0.331626	-1.11513	-0.984355
YDR483W	KRE2	Alpha1,2-mannosyltransferase of the Golgi involved in protein mannosylation	4		-0.0562665	-0.224578	-0.255695	-0.243789	-0.210775	0.0109486	-0.0202291	-0.090592	-0.0126698	-0.135984	-0.108822	-0.180401	-0.379159	-0.112484	0.012452
YDR484W	VPS52	Component of the GARP (Golgi-associated retrograde protein) complex, Vps51p-Vps52p-Vps53p-Vps54p, which is required for the recycling of proteins from endosomes to the late Golgi; involved in localization of actin and chitin	4	GARP complex	0.0383027	0.0889309	0.113553	0.0514728	0.12415	-0.0319916	-0.006962	0.27642	-0.101504	0.0848474	-0.0200585	-0.102826	0.0940458	0.129488	0.142497
YDR485C	VPS72	Htz1p-binding component of the SWR1 complex, which exchanges histone variant H2AZ (Htz1p) for chromatin-bound histone H2A; required for vacuolar protein sorting	4	Swr1p complex	0.109419	-0.036936	0.258861	-0.0065081	-0.0187572	0.0446487	-0.210732	-0.512766	-0.22306	-0.067404	-0.181798	0.097057	-0.183778	-0.519176	-0.0733001
YDR486C	VPS60	Cytoplasmic and vacuolar membrane protein involved in late endosome to vacuole transport; required for normal filament maturation during pseudohyphal growth; may function in targeting cargo proteins for degradation; interacts with Vta1p	4		-0.0583183	-0.0391943	0.272718	0.704035	-0.381255	0.174169	0.167751	0.196711	-0.568659	-0.327692	-0.109818	0.070241	-0.23454	0.0145415	-0.427444
YDR487C	RIB3	3,4-dihydroxy-2-butanone-4-phosphate synthase (DHBP synthase), required for riboflavin biosynthesis from ribulose-5-phosphate, also has an unrelated function in mitochondrial respiration	4		-0.0293215	-0.058138	-0.358165	-0.16403	-0.0546457	-0.0706616	-0.0686165	0.0186897	0.18059	-0.0569342	-0.335566	-0.08836	0.0769575	-1.02966	-1.04806
YDR490C	PKH1	Serine/threonine protein kinase involved in sphingolipid-mediated signaling pathway that controls endocytosis; activates Ypk1p and Ykr2p, components of signaling cascade required for maintenance of cell wall integrity; redundant with Pkh2p	4		0.0504972	-0.0038135	0.287525	0.0056948	0.30292	0.0772422	0.0167754	0.34846	0.0387854	-0.11227	0.0824638	0.378227	0.22566	0.654665	0.01062
YDR492W	IZH1	Membrane protein involved in zinc ion homeostasis, member of the four-protein IZH family; transcription is regulated directly by Zap1p, expression induced by zinc deficiency and fatty acids; deletion increases sensitivity to elevated zinc	4		0.0006627	-0.0632646	-0.597697	-0.987678	0.100393	-0.237131	-0.332956	-0.222718	-0.182902	0.808679	0.25711	-1.1486	-0.223057	-0.780088	-0.372278
YDR493W	AIM8	Protein required for assembly of the cytochrome bc(1) complex; facilitates insertion of Rip1p into the complex at a late stage of assembly; localized to the mitochondrial matrix; null mutant exhibits a respiratory growth defect and reduced mitochondrial zinc levels, which is characteristic of mutations affecting bc(1) complex assembly; conserved in metazoans	4		0.0475291	-0.113824	-0.159835	0.0210492	-0.1111	0.107908	-0.0224927	-0.17537	0.304226	-0.718883	-0.0761225	0.259058	-0.415755	-0.211275	-0.0716281
YDR494W	RSM28	Mitochondrial ribosomal protein of the small subunit; genetic interactions suggest a possible role in promoting translation initiation	4		0.0774745	0.0392025	0.219977	-0.144595	-0.0679967	0.0262775	0.139632	0.0630908	0.234145	-0.382551	0.11771	0.525085	-0.0575158	0.683115	0.022557
YDR495C	VPS3	Component of CORVET tethering complex; cytoplasmic protein required for the sorting and processing of soluble vacuolar proteins, acidification of the vacuolar lumen, and assembly of the vacuolar H+-ATPase	4	CORVET complex	-0.0460802	0.0867739	-0.14065	0.166826	0.129019	0.323955	0.188656	-0.158852	-0.134179	-0.0308346	-0.0441675	-0.049476	0.151966	-0.0053815	-0.002331
YDR496C	PUF6	Pumilio-homology domain protein that binds the 3' UTR of ASH1 mRNA and represses its translation, resulting in proper asymmetric localization of ASH1 mRNA; also co-sediments with the 60S ribosomal subunit and is required for its biogenesis	4		0.0227463	-0.0880021	-0.0897211	0.0407828	-0.0293511	0.0110096	0.0139255	0.0542409	-0.03779	0.189297	0.0848611	-0.022253	0.0026634	-0.511464	-0.013427
YDR497C	ITR1	Myo-inositol transporter with strong similarity to the minor myo-inositol transporter Itr2p, member of the sugar transporter superfamily; expression is repressed by inositol and choline via Opi1p and derepressed via Ino2p and Ino4p	4		0.0946973	-0.0521175	0.0423314	0.0779346	-0.101136	-0.177475	0.230176	-0.565347	0.102778	-0.0990481	-0.021248	-0.0116115	-0.22985	0.256108	0.170104
YDR499W	LCD1	Essential protein required for the DNA integrity checkpoint pathways; interacts physically with Mec1p; putative homolog of S. pombe Rad26 and human ATRIP	4												-0.0809665	-0.029714	-0.107938	-0.0020915	0.060314
YDR500C	RPL37B	Ribosomal 60S subunit protein L37B; protein abundance increases in response to DNA replication stress; homologous to mammalian ribosomal protein L37, no bacterial homolog; RPL37B has a paralog, RPL37A, that arose from the whole genome duplication	4	cytoplasmic ribosomal large subunit	0.0069745	-0.21961	-0.279474	-0.274596	-0.268789	-0.0472432	-0.0724527	-0.265885	-0.0989311	-1.21097	-0.127398	-0.354276	-0.410055	-0.767165	-0.391316
YDR502C	SAM2	S-adenosylmethionine synthetase; catalyzes transfer of the adenosyl group of ATP to the sulfur atom of methionine; SAM2 has a paralog, SAM1, that arose from the whole genome duplication	4		-0.0452425	0.180083	-0.335814	0.112605	-0.233606	-0.0682127	0.240884	-0.66653	-0.0508163	0.300405	-0.0984485	-0.209749	-0.349036	-0.485426	-0.812529
YDR505C	PSP1	Asn and gln rich protein of unknown function; high-copy suppressor of POL1 (DNA polymerase alpha) and partial suppressor of CDC2 (polymerase delta) and CDC6 (pre-RC loading factor) mutations; overexpression results in growth inhibition	4		0.12021	0.14599	-0.0127367	-0.0184351	0.0758479	0.0456401	0.0830464	-0.165284	0.0156943	-0.276613	-0.0075815	-0.094195	0.0240008	0.182737	-0.103179
YDR507C	GIN4	Protein kinase involved in bud growth and assembly of the septin ring; proposed to have kinase-dependent and kinase-independent activities; undergoes autophosphorylation; similar to Hsl1p; GIN4 has a paralog, KCC4, that arose from the whole genome duplication	4		-0.0113929	0.10111	-0.0139746	0.126039	0.0153332	0.052846	0.015506	-0.123624	-0.0711345	-0.0975803	0.0305255	-0.374405	-0.0291643	0.16655	-0.179349
YDR508C	GNP1	High-affinity glutamine permease; also transports Leu, Ser, Thr, Cys, Met and Asn; expression is fully dependent on Grr1p and modulated by the Ssy1p-Ptr3p-Ssy5p (SPS) sensor of extracellular amino acids; GNP1 has a paralog, AGP1, that arose from the whole genome duplication	4		0.0512226	-0.102059	-0.0264757	-0.528837	-0.538429	-0.0292514	-0.444268	-0.298409	-0.481259	-0.528768	0.0489345	-0.128772	-0.226423	-0.564871	-0.0531371
YDR510W	SMT3	Ubiquitin-like protein of the SUMO family, conjugated to lysine residues of target proteins; regulates chromatid cohesion, chromosome segregation, APC-mediated proteolysis, DNA replication and septin ring dynamics; phosphorylated at Ser2	4		0.209527	-0.123779	0.203807	-0.0376696	-0.200038	-0.239427	-0.0372183	-0.219273	-0.112675	-0.195434	-0.0212105	-0.091459	-0.244299	-0.342417	0.050533
YDR511W	ACN9	Protein of the mitochondrial intermembrane space, required for acetate utilization and gluconeogenesis; has orthologs in higher eukaryotes	4		-0.167179	0.0355078	-0.39914	0.244823	-0.514563	0.0709473	0.130094	-0.16463	0.580641	-0.478771	-0.1268	0.665798	-0.505601	0.125805	-0.114365
YDR512C	EMI1	Non-essential protein required for transcriptional induction of the early meiotic-specific transcription factor IME1, also required for sporulation; contains twin cysteine-x9-cysteine motifs	4												0.0585285	0.52612	0.323005	0.308645	0.044302
YDR513W	GRX2	Cytoplasmic glutaredoxin; thioltransferase, glutathione-dependent disulfide oxidoreductase involved in maintaining redox state of target proteins, also exhibits glutathione peroxidase activity, expression induced in response to stress; GRX2 has a paralog, GRX1, that arose from the whole genome duplication	4		0.0508825	0.0619719	0.464001	-0.462309	0.362488	-0.0367691	0.152188	0.283821	0.28504	0.127082	0.0001185	0.341189	0.259135	0.527454	0.116054
YDR514C	YDR514C	Protein of unknown function that localizes to mitochondria; overexpression affects endocytic protein trafficking; YDR514C has a paralog, GFD2, that arose from the whole genome duplication	4							0.441123	1.02439	0.158355	0.553144	1.19527	-0.225419	0.368751	-0.232028	-0.408141	0.439481
YDR515W	SLF1	RNA binding protein that associates with polysomes; may be involved in regulating mRNA translation; involved in the copper-dependent mineralization of copper sulfide complexes on cell surface in cells cultured in copper salts; SLF1 has a paralog, SRO9, that arose from the whole genome duplication; protein abundance increases in response to DNA replication stress	4		-0.0988974	-0.0301376	0.246157	-0.101893	-0.00560145	0.0756061	0.208435	0.105445	0.326509	0.2041	0.0057165	0.331993	0.254146	0.339428	0.141941
YDR516C	EMI2	Non-essential protein of unknown function; required for transcriptional induction of the early meiotic-specific transcription factor IME1; required for sporulation; expression regulated by glucose-repression transcription factors Mig1/2p; EMI2 has a paralog, GLK1, that arose from the whole genome duplication; protein abundance increases in response to DNA replication stress	4		-0.0443247	-0.0793531	-0.165082	-0.163522	0.00385175	0.17231	-0.0757372	-0.144794	-0.196638	-0.0646031	0.0200255	-0.054812	0.0970243	0.278477	-0.285159
YDR517W	GRH1	Acetylated cis-Golgi protein, involved in ER to Golgi transport; homolog of human GRASP65; forms a complex with the coiled-coil protein Bug1p; mutants are compromised for the fusion of ER-derived vesicles with Golgi membranes; protein abundance increases in response to DNA replication stress	4	Grh1p/Bug1p complex	-0.0234951	0.0973869	-0.33481	0.482653	0.107734	-0.0537665	-0.0246968	-0.182745	0.0506898	0.0207218	0.0433415	-0.124643	-0.336761	0.349261	-0.005799
YDR518W	EUG1	Protein disulfide isomerase of the endoplasmic reticulum lumen; EUG1 has a paralog, PDI1, that arose from the whole genome duplication; function overlaps with that of Pdi1p; may interact with nascent polypeptides in the ER	4		-0.0004676	0.043954	-0.30642	-0.471519	0.330518	0.0171337	-0.004796	-0.0512619	0.477799	0.5055	0.0360925	-0.585387	0.205128	0.0498705	-0.0559211
YDR519W	FPR2	Membrane-bound peptidyl-prolyl cis-trans isomerase (PPIase), binds to the drugs FK506 and rapamycin; expression pattern suggests possible involvement in ER protein trafficking	4							-0.0971877	0.889293	0.785053	0.525318	0.347977	0.0136025	0.01283	0.59639	1.48056	0.64728
YDR520C	URC2	Putative Zn(II)2Cys6 motif containing transcription factor; non-essential gene identified in a screen for mutants with increased levels of rDNA transcription; similar to S. kluyveri Urc2p involved in uracil catabolism	4		0.23892	-0.123006	0.233441	0.217589	0.0830453						-1.15e-05	-0.351195	0.141273	0.126577	-0.262456
YDR524C	AGE1	ADP-ribosylation factor (ARF) GTPase activating protein (GAP) effector, involved in the secretory and endocytic pathways; contains C2C2H2 cysteine/histidine motif	4		0.245765	-0.0511302	-0.171315	-0.0123502	0.222548						0.0048245	-0.165104	-0.0932081	0.134983	0.261143
YDR527W	RBA50	Protein involved in transcription; interacts with RNA polymerase II subunits Rpb2p, Rpb3, and Rpb11p; has similarity to human RPAP1	4		0.0128695	-0.106256	-0.238059	-0.314402	0.0495243	-0.0942467	-0.233989	-0.141884	-0.377729	-0.0950643	0.0529775	0.17309	0.0275972	-0.559489	0.086618
YDR528W	HLR1	Protein involved in regulation of cell wall composition and integrity and response to osmotic stress; overproduction suppresses a lysis sensitive PKC mutation; similar to Lre1p, which functions antagonistically to protein kinase A; <br>HLR1 has a paralog, LRE1, that arose from the whole genome duplication	4		0.0543393	-0.135626	0.0387035	-0.581558	-0.47516	-0.179673	-0.159878	-0.294469	-0.00922855	-0.342761	-0.107196	-0.096502	-0.563363	-0.279238	-0.028986
YDR529C	QCR7	Subunit 7 of the ubiquinol cytochrome-c reductase complex, which is a component of the mitochondrial inner membrane electron transport chain; oriented facing the mitochondrial matrix; N-terminus appears to play a role in complex assembly	4	Cytochrome bc1 complex (Ubiquinol-cytochrome c reductase complex, complex III)	0.0729244	0.0269391	0.140611	-0.311534	-0.187721	-0.00629205	-0.0837918	-0.313506	0.23862	-1.41038	0.0039175	0.115788	-0.706839	0.569313	-0.355433
YDR530C	APA2	Diadenosine 5',5'''-P1,P4-tetraphosphate phosphorylase II; AP4A phosphorylase involved in catabolism of bis(5'-nucleosidyl) tetraphosphates; APA2 has a paralog, APA1, that arose from the whole genome duplication	4		-0.0569834	0.223306	0.229654	0.428653	0.129786	0.0453346	0.463399	0.207103	-0.0832002	-0.337911	-0.108984	-0.028288	-0.213816	0.0472095	-0.448994
YDR531W	CAB1	Pantothenate kinase (ATP:D-pantothenate 4'-phosphotransferase, EC 2.7.1.33); catalyzes the first committed step in the universal biosynthetic pathway for synthesis of coenzyme A (CoA); transcriptionally regulated by Upc2p via a sterol response element	4		-0.0264795	-0.0107811	-0.133201	0.200016	-0.00416527	-0.102186	0.144142	-0.107599	0.121605	0.181045	-0.0356965	-0.157023	0.33445	-0.0456115	-0.0537178
YDR532C	YDR532C	Subunit of a kinetochore-microtubule binding complex with Spc105p that bridges centromeric heterochromatin and kinetochore MAPs and motors, and is also required for sister chromatid bi-orientation and kinetochore binding of SAC components	4		0.0597871	0.179751	0.0957916	0.44857	0.107601	-0.20186	0.0478614	-0.476134	-0.0168172	-0.0593363	0.39947	-0.091141	0.435654	0.0855075	0.623834
YDR533C	HSP31	Possible chaperone and cysteine protease; has similarity to E. coli Hsp31; member of the DJ-1/ThiJ/PfpI superfamily, which includes human DJ-1 involved in Parkinson's disease; exists as a dimer and contains a putative metal-binding site; protein abundance increases in response to DNA replication stress	4		0.098363	0.322242	-0.172226	-1.2299	0.565096	0.0351831	1.19163	-0.259829	0.190033	-0.635745	0.147979	0.579187	-0.441386	-0.323456	-0.35828
YDR539W	YDR539W	Putative phenylacrylic acid decarboxylase; essential for the decarboxylation of aromatic carboxylic acids to the corresponding vinyl derivatives; homolog of E. coli UbiD; GFP-fusion protein localizes to the cytoplasm	4		0.0096258	-0.102575	-0.151284	-0.0591599	-0.0973786	0.107683	0.0332497	-1.00819	0.435492	0.256141	-0.0259895	-0.245108	-0.0435182	-0.0391025	-0.056327
YEL001C	IRC22	Putative protein of unknown function; green fluorescent protein (GFP)-fusion localizes to the ER; YEL001C is non-essential; null mutant displays increased levels of spontaneous Rad52p foci	5		-0.0475593	-0.209307	-0.00439396	1.1674	-0.372728						0.192186	-0.37895	0.266388	-0.379181	0.18291	1.1674
YEL002C	WBP1	Beta subunit of the oligosaccharyl transferase (OST) glycoprotein complex; required for N-linked glycosylation of proteins in the endoplasmic reticulum	5	oligosaccharyl transferase complex	-0.0248071	-0.0964652	-0.0917898	0.654294	-0.20549	-0.104953	-0.021492	-0.0236758	-0.0592035	-0.106982	-0.0173545	0.018044	-0.0741081	-0.148344	0.085097	0.654294
YEL003W	GIM4	Subunit of the heterohexameric cochaperone prefoldin complex which binds specifically to cytosolic chaperonin and transfers target proteins to it	5	prefoldin complex	-0.102113	-0.0648427	-0.479558	0.157023	-0.251527	0.0319574	-0.230019	-0.306184	-0.126959	-0.131074	-0.0649315	-0.330895	-0.334671	-0.786921	-0.108706	0.157023
YEL006W	YEA6	Putative mitochondrial NAD+ transporter, member of the mitochondrial carrier subfamily (see also YIA6); has putative human ortholog	5		0.220514	0.50442	-0.130321	1.62951	-0.159341						0.120383	-0.705899	-0.137173	-0.199782	-0.281663	1.62951
YEL007W	YEL007W	Transcriptional regulator of pseudohyphal growth; protein with sequence similarity to S. pombe gti1+ (gluconate transport inducer 1) and C. albicans Wor1	5		-0.0831754	0.0102589	-0.515982	-0.0584182	-0.30714	-0.00275515	-0.0506058	-0.231313	-0.187543	-0.550161	0.0454325	0.008645	-0.0165882	-0.435119	0.004629	-0.0584182
YEL011W	GLC3	Glycogen branching enzyme, involved in glycogen accumulation; green fluorescent protein (GFP)-fusion protein localizes to the cytoplasm in a punctate pattern	5		-0.016077	0.25034	-0.107929	1.00865	0.142058	0.180371	0.260605	0.00866403	-0.627357	-1.19106	-0.15584	0.150133	0.172948	0.649466	-0.668997	1.00865
YEL012W	UBC8	Ubiquitin-conjugating enzyme that negatively regulates gluconeogenesis by mediating the glucose-induced ubiquitination of fructose-1,6-bisphosphatase (FBPase); cytoplasmic enzyme that catalyzes the ubiquitination of histones in vitro	5		0.104622	-0.0190382	-0.0502638	1.25535	-0.199128	0.331244	0.164457	0.382839	-0.0530465	0.115989	0.0107755	-0.179753	-0.349362	0.253071	0.000165	1.25535
YEL013W	VAC8	Phosphorylated and palmitoylated vacuolar membrane protein that interacts with Atg13p, required for the cytoplasm-to-vacuole targeting (Cvt) pathway; interacts with Nvj1p to form nucleus-vacuole junctions	5		0.0666204	0.0861639	0.162075	0.990173	0.0760955	-0.0535789	-0.0907897	-0.102082	-0.137217	0.101271	-0.0195425	-0.095916	0.117335	0.0939125	0.041549	0.990173
YEL015W	EDC3	Non-essential conserved protein of unknown function, plays a role in mRNA decapping by specifically affecting the function of the decapping enzyme Dcp1p; localizes to cytoplasmic mRNA processing bodies	5		-0.0080588	-0.0021124	-0.0364818	1.07335	-0.374832	-0.0851357	-0.287411	-0.134683	-0.244342	-0.132305	0.207753	-0.050543	-0.0840801	0.0131545	0.20811	1.07335
YEL017W	GTT3	Protein of unknown function with a possible role in glutathione metabolism, as suggested by computational analysis of large-scale protein-protein interaction data; GFP-fusion protein localizes to the nuclear periphery	5		0.0690697	0.173639	0.167374	1.39459	-0.0509078	0.0976275	-0.0291955	-0.328845	-0.300362	-0.329874	-0.0247695	0.482644	-0.336633	0.373897	0.390028	1.39459
YEL018W	EAF5	Esa1p-associated factor, non-essential subunit of the NuA4 acetyltransferase complex	5	NuA4 histone acetyltransferase complex	0.226417	0.190318	-0.0919017	1.00466	0.36647	0.00964565	-0.114843	-0.507625	0.00893455	0.0731209	0.0565725	-0.325256	0.132243	-0.0235515	0.058563	1.00466
YEL020W-A	TIM9	Essential protein of the mitochondrial intermembrane space, forms a complex with Tim10p (TIM10 complex) that delivers hydrophobic proteins to the TIM22 complex for insertion into the inner membrane	5	mitochondrial intermembrane space protein transporter complex	0.0117303	-0.156312	-0.123258	0.544455	-0.352092	0.022899	-0.013691	-0.371531	0.154205	-0.306034	-0.0875495	0.035085	-0.0671352	-0.39588	-0.156075	0.544455
YEL021W	URA3	Orotidine-5'-phosphate (OMP) decarboxylase, catalyzes the sixth enzymatic step in the de novo biosynthesis of pyrimidines, converting OMP into uridine monophosphate (UMP); converts 5-FOA into 5-fluorouracil, a toxic compound	5		-0.0162997	0.427826	0.27897	1.03003	0.371473	0.0170238	0.529641	0.100635	0.325297	-0.108463	-0.0947635	0.505018	-0.203324	-0.255293	-0.42473	1.03003
YEL022W	GEA2	Guanine nucleotide exchange factor for ADP ribosylation factors (ARFs), involved in vesicular transport between the Golgi and ER, Golgi organization, and actin cytoskeleton organization; similar to but not functionally redundant with Gea1p	5		0.0662671	0.0634369	-0.0895121	1.1404	0.0691684	0.0280057	0.0185291	0.166538	0.121197	0.165737	0.156005	-0.111013	0.164655	0.0760645	-0.016451	1.1404
YEL024W	RIP1	Ubiquinol-cytochrome-c reductase, a Rieske iron-sulfur protein of the mitochondrial cytochrome bc1 complex; transfers electrons from ubiquinol to cytochrome c1 during respiration; during import, Rip1p is first imported into the mitochondrial matrix where it is processed, acquires its Fe-S cluster, and is folded, then is translocated into the inner membrane by the action of a homo-oligomer of Bcs1…	5	Cytochrome bc1 complex (Ubiquinol-cytochrome c reductase complex, complex III)	-0.0378336	0.112351	0.0456718	0.300887	-0.310099	-0.0687357	0.0200396	-0.212729	0.132724	-1.54115	0.0414605	0.31844	-0.649202	0.803306	-0.120661	0.300887
YEL026W	SNU13	RNA binding protein, part of U3 snoRNP involved in rRNA processing, part of U4/U6-U5 tri-snRNP involved in mRNA splicing, similar to human 15.5K protein	5	box C/D snoRNP complex, U4/U6 x U5 tri-snRNP complex	0.0038281	-0.279385	-0.342561	-0.38037	-0.238268	0.0473055	-0.159717	-0.250892	-0.107305	-0.205177	-0.181406	-0.259721	-0.395093	-0.894532	-0.220728	-0.38037
YEL029C	BUD16	Putative pyridoxal kinase, a key enzyme involved in pyridoxal 5'-phosphate synthesis, the active form of vitamin B6; required for genome integrity; involved in bud-site selection; similarity to yeast BUD17 and human pyridoxal kinase (PDXK)	5							0.0592336	-0.254302	-0.218061	0.13476	0.123777	-0.0298335	-0.048655	0.0403934	-0.2399	0.148378
YEL030W	ECM10	Heat shock protein of the Hsp70 family, localized in mitochondrial nucleoids, plays a role in protein translocation, interacts with Mge1p in an ATP-dependent manner; overexpression induces extensive mitochondrial DNA aggregations	5		-0.149263	-0.103869	-0.217235	0.105075	-0.372047	-0.026333	-0.0902987	1.13641	-0.491006	-0.941583	-0.0894725	0.064641	-0.138393	0.157399	-0.115157	0.105075
YEL031W	SPF1	P-type ATPase, ion transporter of the ER membrane; required to maintain normal lipid composition of intracellular compartments and proper targeting of mitochondrial outer membrane tail-anchored proteins; involved in ER function and Ca2+ homeostasis; required for regulating Hmg2p degradation; confers sensitivity to a killer toxin (SMKT) produced by Pichia farinosa KK1	5		0.0005196	-0.0938141	-0.0555096	0.949513	-0.070539	-0.0168526	-0.0113908	0.0368271	0.12029	-0.0798303	-0.0683105	0.113352	0.0879425	-0.481864	-0.001409	0.949513
YEL032W	MCM3	Protein involved in DNA replication; component of the Mcm2-7 hexameric complex that binds chromatin as a part of the pre-replicative complex	5	Mcm2-7 complex	0.0334853	0.0321637	-0.3305	0.845543	-0.369897	0.0404465	-0.0112747	-0.0608293	-0.151277	-0.0041012	-0.0675655	-0.38914	-0.125414	-0.0563165	-0.264421	0.845543
YEL034W	HYP2	Translation elongation factor eIF-5A; may function in translation initiation; structural homolog of bacterial EF-P; undergoes an essential hypusination modification; HYP2 has a paralog, ANB1, that arose from the whole genome duplication	5		-0.0057679	0.0106705	-0.161583	0.780602	-0.147422	0.0662982	0.163344	-0.0785554	-0.0292951	-0.0601462	0.0292465	-0.072813	-0.406475	-0.545362	0.106064	0.780602
YEL036C	ANP1	Subunit of the alpha-1,6 mannosyltransferase complex; type II membrane protein; has a role in retention of glycosyltransferases in the Golgi; involved in osmotic sensitivity and resistance to aminonitrophenyl propanediol	5	alpha-1,6-mannosyltransferase complex(Anp1p/Mnn9p)	-0.129408	-0.179872	-0.101064	0.559548	-0.0726014	-0.0548749	-0.0052534	-0.323704	-0.123975	-0.0723622	0.128602	-0.331523	0.129574	-0.251136	0.01521	0.559548
YEL037C	RAD23	Protein with ubiquitin-like N terminus, subunit of Nuclear Excision Repair Factor 2 (NEF2) with Rad4p that binds damaged DNA; enhances protein deglycosylation activity of Png1p; also involved, with Rad4p, in ubiquitylated protein turnover	5	nucleotide-excision repair factor 2 complex, Png1p/Rad23p complex	-0.0463769	-0.0746601	-0.159164	0.886742	-0.159212	-0.00068765	-0.0425609	-0.364927	-0.214807	-0.120882	0.100227	0.015091	-0.138805	-0.719394	-0.174484	0.886742
YEL038W	UTR4	Protein with sequence similarity to 2,3-diketo-5-methylthiopentyl-1-phosphate enolase-phosphatases, involved in methionine salvage; found in both the cytoplasm and nucleus	5		0.0728958	0.40592	0.732058	0.842027	0.695802	0.0353539	0.813993	0.588065	0.64771	0.341002	-0.0900065	0.740509	0.140033	-0.0046895	-0.0931658	0.842027
YEL039C	CYC7	Cytochrome c isoform 2, expressed under hypoxic conditions; electron carrier of the mitochondrial intermembrane space that transfers electrons from ubiquinone-cytochrome c oxidoreductase to cytochrome c oxidase during cellular respiration; protein abundance increases in response to DNA replication stress	5		0.0030141	-0.0139979	-0.233974	0.580573	0.519306	-0.0767446	0.107624	-0.198934	0.162074	-0.281597	0.0394385	0.572535	-0.193363	0.49671	-0.13754	0.580573
YEL040W	UTR2	Chitin transglycosylase that functions in the transfer of chitin to beta(1-6) and beta(1-3) glucans in the cell wall; similar to and functionally redundant with Crh1; glycosylphosphatidylinositol (GPI)-anchored protein localized to bud neck	5		-0.0242078	-0.0674304	-0.205099	1.4557	-0.310244	0.103249	0.049552	0.0949717	-0.272036	0.631571	-0.0848935	-0.144745	-0.135814	-0.464074	0.110698	1.4557
YEL042W	GDA1	Guanosine diphosphatase located in the Golgi, involved in the transport of GDP-mannose into the Golgi lumen by converting GDP to GMP after mannose is transferred its substrate	5		-0.0225953	-0.184912	-0.372852	0.598338	-0.481968	0.0193858	-0.119601	-0.266435	-0.00115325	-0.531519	-0.0724435	-0.113146	-0.467598	-0.387661	-0.245357	0.598338
YEL043W	YEL043W	Predicted cytoskeleton protein involved in intracellular signalling based on quantitative analysis of protein-protein interaction maps; may interact with ribosomes, based on co-purification studies; contains fibronectin type III domain fold	5		-0.157493	0.0029717	-0.0571026	0.597311	-0.266158	0.11967	-0.0237259	0.0940615	0.00948825	0.0922472	0.0678149	-0.167706	0.0290815	-0.26164	0.053349	0.597311
YEL044W	IES6	Protein that associates with the INO80 chromatin remodeling complex under low-salt conditions; human ortholog INO80C is a member of the human INO80 complex; implicated in DNA repair based on genetic interactions with RAD52 epistasis genes	5		0.0822813	-0.0079236	-0.0275791	0.300332	-0.151388	-0.0492909	0.0712783	-0.176584	0.176653	0.113856	0.0356825	-0.004157	0.494628	0.16458	0.152412	0.300332
YEL046C	GLY1	Threonine aldolase, catalyzes the cleavage of L-allo-threonine and L-threonine to glycine; involved in glycine biosynthesis	5		0.0180992	-0.0001202	-0.298456	0.717554	-0.277875	-0.0931387	-0.185034	-0.279979	-0.216796	-0.342716	-0.0320265	-0.384222	0.0872235	-0.354382	-0.167035	0.717554
YEL047C	YEL047C	Soluble fumarate reductase; required with isoenzyme Osm1p for anaerobic growth; may interact with ribosomes, based on co-purification experiments; authentic, non-tagged protein is detected in purified mitochondria in high-throughput studies; similar to Arxula adeninovorans fumarate reductase; protein abundance increases in response to DNA replication stress	5		-0.0594068	0.524611	-0.0840673	1.0683	0.539266	-0.0630697	0.466462	0.0428563	0.655088	0.462795	-0.0219655	0.495041	0.110305	0.273735	-0.619197	1.0683
YEL050C	RML2	Mitochondrial ribosomal protein of the large subunit, has similarity to E. coli L2 ribosomal protein; fat21 mutant allele causes inability to utilize oleate and may interfere with activity of the Adr1p transcription factor	5	mitochondrial ribosomal large subunit						0.0175069	0.381359	-0.118401	0.461953	-0.821655	0.0834611	0.58345	-0.359147	0.44859	-0.0834401
YEL051W	VMA8	Subunit D of the eight-subunit V1 peripheral membrane domain of the vacuolar H+-ATPase (V-ATPase), an electrogenic proton pump found throughout the endomembrane system; plays a role in the coupling of proton transport and ATP hydrolysis	5	H+-transporting ATPase, vacuolar, H+-transporting ATPase, Golgi	-0.140022	-0.0150378	-0.0432604	0.449782	0.00654145	-0.0449831	-0.0406469	-0.197271	0.0936807	0.191794	-0.0098525	-0.502673	-0.0233947	-0.245409	-0.222829	0.449782
YEL052W	AFG1	Conserved protein that may act as a chaperone in the degradation of misfolded or unassembled cytochrome c oxidase subunits; localized to matrix face of the mitochondrial inner membrane; member of the AAA family but lacks a protease domain	5		0.129182	0.113361	-0.194127	0.940583	-0.0172628	0.103393	0.16355	0.302045	0.225637	-0.386694	0.0101645	0.521364	0.0096196	0.351919	-0.165424	0.940583
YEL053C	MAK10	Non-catalytic subunit of N-terminal acetyltransferase of the NatC type, required for replication of dsRNA virus; expression is glucose-repressible	5	NatC complex	-0.0290436	-0.0323391	0.446347	0.933717	0.0707842	0.0278649	0.101514	0.163853	0.166437	0.372101	0.0093945	-0.294507	-0.121639	-0.385986	-0.277265	0.933717
YEL054C	RPL12A	Ribosomal 60S subunit protein L12A; rpl12a rpl12b double mutant exhibits slow growth and slow translation; homologous to mammalian ribosomal protein L12 and bacterial L11; RPL12A has a paralog, RPL12B, that arose from the whole genome duplication	5	cytoplasmic ribosomal large subunit	0.0016482	-0.167557	-0.341803	-0.321706	-0.315934	-0.0449749	-0.170333	-0.385192	-0.118895	-0.232346	0.019133	-0.525417	-0.43375	-0.819067	-0.364211	-0.321706
YEL055C	POL5	DNA Polymerase phi; has sequence similarity to the human MybBP1A and weak sequence similarity to B-type DNA polymerases, not required for chromosomal DNA replication; required for the synthesis of rRNA	5	UTP A complex	-0.0256047	0.0560699	-0.325814	1.15019	-0.149733	-0.0233073	0.138935	0.0995058	-0.234498	0.130656	-0.0901425	-0.059257	-0.0008001	-0.237083	-0.043905	1.15019
YEL056W	HAT2	Subunit of the Hat1p-Hat2p histone acetyltransferase complex; required for high affinity binding of the complex to free histone H4, thereby enhancing Hat1p activity; similar to human RbAp46 and 48; has a role in telomeric silencing	5	HAT-B complex	-0.0284745	-0.007364	-0.313555	0.981183	-0.643378	0.159828	-0.177794	-0.00379009	-0.171477	-0.302885	0.0819693	-0.181766	-0.162053	-0.0651815	0.06115	0.981183
YEL058W	PCM1	Essential N-acetylglucosamine-phosphate mutase; converts GlcNAc-6-P to GlcNAc-1-P, which is a precursor for the biosynthesis of chitin and for the formation of N-glycosylated mannoproteins and glycosylphosphatidylinositol anchors	5		-0.0239046	0.116761	0.0301837	1.05466	0.054665	0.0564994	0.287614	0.376179	0.136565	0.626898	0.0103105	-0.098947	0.125444	0.292587	0.12438	1.05466
YEL060C	PRB1	Vacuolar proteinase B (yscB); serine protease of the subtilisin family; involved in protein degradation in the vacuole and required for full protein degradation during sporulation; activity inhibited by Pbi2p; protein abundance increases in response to DNA replication stress	5		-0.0401636	0.105222	-0.18622	0.511869	0.131364	-0.060713	0.384456	0.155812	0.182673	0.118152	0.0216255	-0.356319	0.397896	0.486351	-0.442434	0.511869
YEL061C	CIN8	Kinesin motor protein involved in mitotic spindle assembly and chromosome segregation	5		-0.0609948	0.309347	0.220109	1.18072	0.0996968	0.0579903	-0.252906	-0.144605	-0.272421	-0.475583	0.129897	-0.33933	-0.310054	-0.422021	-0.006037	1.18072
YEL062W	NPR2	Subunit of SEA (Seh1-associated), Npr2/3, and Iml1p complexes; Npr2/3 complex mediates downregulation of TORC1 activity upon amino acid limitation; SEA complex is a coatomer-related complex that associates dynamically with the vacuole; Iml1p complex (Iml1p-Npr2p-Npr3p) is required for non-nitrogen-starvation (NNS)-induced autophagy; Iml1p interacts primarily with phosphorylated Npr2p; homolog of …	5		-0.0392591	0.18082	0.109226	0.970563	0.246049	0.0425933	-0.113642	0.0619675	-0.0462884	0.0120105	-0.228907	0.102211	-0.292242	0.146909	-0.272715	0.970563
YEL065W	SIT1	Ferrioxamine B transporter, member of the ARN family of transporters that specifically recognize siderophore-iron chelates; transcription is induced during iron deprivation and diauxic shift; potentially phosphorylated by Cdc28p	5		0.142983	-0.174897	0.284079	0.926983	-1.41829						-0.0617565	-0.799958	0.0443714	-0.475873	0.073409	0.926983
YEL066W	HPA3	D-Amino acid N-acetyltransferase, catalyzes N-acetylation of D-amino acids through ordered bi-bi mechanism in which acetyl-CoA is first substrate bound and CoA is last product liberated; similar to Hpa2p, acetylates histones weakly in vitro	5		-0.0077619	-0.0973679	-0.263601	1.01801	-0.159231	-0.0199857	-0.142305	-0.324683	-0.0830802	-0.590623	0.0784169	0.127774	-0.0588278	0.240114	-0.0906584	1.01801
YEL070W	DSF1	Deletion suppressor of mpt5 mutation; identical in amino acid sequence to Ynr073cp	5												0.141136	-0.471688	1.05221	2.46505	0.272502
YEL071W	DLD3	D-lactate dehydrogenase, part of the retrograde regulon which consists of genes whose expression is stimulated by damage to mitochondria and reduced in cells grown with glutamate as the sole nitrogen source, located in the cytoplasm	5		0.0052611	-0.235818	0.513293	1.19451	0.0447618	-0.0526523	-0.0443723	0.00432489	-0.0438581	0.562973	-0.0705325	-0.458816	-0.0267866	-0.684357	-0.274664	1.19451
YER001W	MNN1	Alpha-1,3-mannosyltransferase, integral membrane glycoprotein of the Golgi complex, required for addition of alpha1,3-mannose linkages to N-linked and O-linked oligosaccharides, one of five S. cerevisiae proteins of the MNN1 family	5		0.0426088	-0.267348	-0.6456	0.788868	-0.148656	-0.0459271	-0.196797	-0.188907	-0.428651	-0.421082	0.0511425	-0.369961	-0.760468	-0.425568	-0.272254	0.788868
YER002W	NOP16	Constituent of 66S pre-ribosomal particles, involved in 60S ribosomal subunit biogenesis	5		0.0170435	-0.0387509	-0.103736	0.636192	-0.0218388	-0.00337415	-0.11845	-0.0237616	-0.0369003	0.232219	-0.0253415	-0.050016	-0.187716	-0.364745	-0.0529886	0.636192
YER003C	PMI40	Mannose-6-phosphate isomerase, catalyzes the interconversion of fructose-6-P and mannose-6-P; required for early steps in protein mannosylation	5		-0.0133924	0.0549779	-0.299589	0.902213	-0.272466	-0.0543299	0.021523	-0.0749441	-0.0641104	-0.836988	0.0246535	0.231798	-0.334243	-0.792574	-0.360338	0.902213
YER004W	FMP52	Protein of unknown function, localized to the mitochondrial outer membrane; induced by treatment with 8-methoxypsoralen and UVA irradiation	5		-0.111727	0.0892589	0.293892	0.909646	0.122517	-0.0558308	0.117713	-0.0230809	0.531569	-0.0142764	0.0297015	0.093817	-0.0563456	-0.262178	0.099307	0.909646
YER005W	YND1	Apyrase with wide substrate specificity, helps prevent inhibition of glycosylation by hydrolyzing nucleoside tri- and diphosphates that inhibit glycotransferases; partially redundant with Gda1p; mediates adenovirus E4orf4-induced toxicity	5		-0.210593	-0.163569	-0.45548	0.548793	-0.341748	0.460105	0.0873399	0.292149	-0.152749	0.471001	0.0513845	-0.290422	-0.571509	-0.503665	-0.162035	0.548793
YER006W	NUG1	GTPase that associates with nuclear 60S pre-ribosomes, required for export of 60S ribosomal subunits from the nucleus	5		-0.0034685	-0.0494659	-0.151343	1.00063	-0.00934474	-0.0337779	-0.0960847	-0.0539869	0.00369365	0.245209	-0.0170975	0.004726	0.131884	-0.0939755	0.039028	1.00063
YER007C-A	TMA20	Protein of unknown function that associates with ribosomes; has a putative RNA binding domain; interacts with Tma22p; null mutant exhibits translation defects; has homology to human oncogene MCT-1; protein abundance increases in response to DNA replication stress	5		-0.0134813	-0.23102	-0.232835	0.757367	-0.0433248	0.0171701	-0.0377433	-0.336633	-0.0279431	0.0722137	0.0023425	-0.203263	-0.142311	-0.505602	-0.026125	0.757367
YER008C	SEC3	Subunit of the exocyst complex (Sec3p, Sec5p, Sec6p, Sec8p, Sec10p, Sec15p, Exo70p, Exo84p) which mediates targeting of post-Golgi vesicles to sites of active exocytosis; Sec3p specifically is a spatial landmark for secretion	5	Exocyst complex	0.0309293	-0.0155571	0.0690644	0.928919	-0.0704126	-0.0842227	-0.0264985	0.0960144	-0.118266	0.025743	0.108028	-0.033055	0.260101	0.0130115	0.104897	0.928919
YER010C	YER010C	Protein of unknown function, forms a ring-shaped homotrimer; has similarity to members of the prokaryotic rraA family; possibly involved in a phosphotransfer reaction	5		0.252966	0.0974809	0.357047	0.92045	-0.119561	-0.0496785	0.00566183	-0.00323877	0.035889	-0.187392	-0.213366	-0.350063	-0.255459	-0.15889	-0.247183	0.92045
YER012W	PRE1	Beta 4 subunit of the 20S proteasome; localizes to the nucleus throughout the cell cycle	5	20S proteasome	-0.0939744	-0.120602	0.178122	0.675255	-0.0221112	-0.0413998	0.050778	-0.0395485	-0.0487296	-0.0457017	-0.0417095	-0.045081	-0.0560364	0.0469165	-0.017323	0.675255
YER013W	PRP22	DEAH-box RNA-dependent ATPase/ATP-dependent RNA helicase, associates with lariat intermediates before the second catalytic step of splicing; mediates ATP-dependent mRNA release from the spliceosome and unwinds RNA duplexes	5		-0.0860944	0.169848	-0.0228927	1.48346	0.198108	0.0548404	-0.0741564	0.0162289	-0.10298	-0.0910903	-0.0048695	0.210675	0.395026	-0.0451075	0.060655	1.48346
YER014W	HEM14	Protoporphyrinogen oxidase, a mitochondrial enzyme that catalyzes the seventh step in the heme biosynthetic pathway, converting protoporphyrinogen IX to protoporphyrin IX; inhibited by diphenyl ether-type herbicides	5		0.0090848	0.0360499	-0.186936	0.770411	0.0958708	0.261783	-0.0051793	0.0719551	0.203311	-0.0008143	0.334275	0.109542	0.373374	0.626405	0.126416	0.770411
YER015W	FAA2	Medium chain fatty acyl-CoA synthetase, activates imported fatty acids; accepts a wide range of fatty acid chain lengths with a preference for medium chains, C9:0-C13:0; localized to the peroxisome	5		0.259443	0.57667	0.393279	0.543292	0.154834						-0.0713035	-0.006685	0.275186	1.21594	0.363864	0.543292
YER016W	BIM1	Microtubule-binding protein that together with Kar9p makes up the cortical microtubule capture site and delays the exit from mitosis when the spindle is oriented abnormally	5		-0.126615	0.274612	-0.139302	1.11296	-0.0599435	-0.0768997	0.0793464	-0.128858	-0.23487	-0.516011	0.0496915	0.108094	0.125509	0.192517	0.248729	1.11296
YER017C	AFG3	Component, with Yta12p, of the mitochondrial inner membrane m-AAA protease that mediates degradation of misfolded or unassembled proteins and is also required for correct assembly of mitochondrial enzyme complexes	5	m-AAA complex	0.0220422	0.0089007	0.283549	0.304893	0.188396	-0.0327214	0.0547839	-0.0562326	0.145066	-0.519485	0.0756904	0.495833	-0.0537045	0.231806	0.017218	0.304893
YER019C-A	SBH2	Ssh1p-Sss1p-Sbh2p complex component, involved in protein translocation into the endoplasmic reticulum; homologous to Sbh1p	5	Ssh1p translocon complex	-0.143213	-0.169198	0.0824343	-0.369119	-0.51615	-0.0805206	-0.372061	-0.613384	-0.516852	-0.295071	0.0551545	-0.155129	-0.108361	-0.659264	-0.31514	-0.369119
YER019W	ISC1	Mitochondrial membrane localized inositol phosphosphingolipid phospholipase C, hydrolyzes complex sphingolipids to produce ceramide; activated by phosphatidylserine, cardiolipin, and phosphatidylglycerol; mediates Na+ and Li+ halotolerance	5		0.158172	0.221028	0.0852529	1.32282	0.00227945	-0.0389602	0.433019	0.168299	-0.30508	0.0595559	0.0682053	-0.007147	-0.469943	0.144709	0.234995	1.32282
YER020W	GPA2	Nucleotide binding alpha subunit of the heterotrimeric G protein that interacts with the receptor Gpr1p, has signaling role in response to nutrients; green fluorescent protein (GFP)-fusion protein localizes to the cell periphery	5		-0.0096641	0.119096	0.0976686	0.663327	-0.300331	0.0848322	-0.0456764	-0.295928	-0.0451894	-0.297945	-0.0760965	0.19547	0.0484457	0.306456	-0.0847162	0.663327
YER021W	RPN3	Essential, non-ATPase regulatory subunit of the 26S proteasome lid, similar to the p58 subunit of the human 26S proteasome; temperature-sensitive alleles cause metaphase arrest, suggesting a role for the proteasome in cell cycle control	5	19/22S regulator	0.022654	-0.0074198	0.303168	0.475492	0.142709	0.0111485	0.0809892	0.110654	-0.0491252	0.200806	0.0217155	0.138625	0.150987	0.0526265	0.28621	0.475492
YER022W	SRB4	Subunit of the RNA polymerase II mediator complex; associates with core polymerase subunits to form the RNA polymerase II holoenzyme; essential for transcriptional regulation; homozygosity of the human MED17 L371P mutation is associated with infantile cerebral and cerebellar atrophy with poor myelination	5	Kornberg's mediator (SRB) complex	-0.026785	-0.0267196	-0.00805191	1.04578	-0.0309724	0.131183	0.0013422	0.478024	0.0755815	0.246033	0.160493	0.011047	0.321713	0.270511	0.14437	1.04578
YER023W	PRO3	Delta 1-pyrroline-5-carboxylate reductase, catalyzes the last step in proline biosynthesis	5		0.0027349	-0.0293754	0.035379	0.90677	-0.125297	-0.107653	-0.0565692	-0.0677184	0.0434428	0.181686	-0.0754255	-0.308446	-0.116596	-0.311819	-0.109588	0.90677
YER024W	YAT2	Carnitine acetyltransferase; has similarity to Yat1p, which is a carnitine acetyltransferase associated with the mitochondrial outer membrane	5		0.054212	-0.11896	0.57843	0.578352	-0.0522329						0.115823	0.418328	-0.207766	0.344949	0.510023	0.578352
YER025W	GCD11	Gamma subunit of the translation initiation factor eIF2, involved in the identification of the start codon; binds GTP when forming the ternary complex with GTP and tRNAi-Met	5	eIF2, multi-eIF complex	-0.04977	-0.0926744	-0.111704	0.758447	-0.291201	0.017084	-0.0661656	-0.191533	-0.0624457	-0.0027982	-0.0044835	-0.098656	0.006041	-0.482947	-0.0543933	0.758447
YER027C	GAL83	One of three possible beta-subunits of the Snf1 kinase complex, allows nuclear localization of the Snf1 kinase complex in the presence of a nonfermentable carbon source; contains glycogen-binding domain	5	Snf1p/Snf4p/Gal83p complex	0.11886	-0.067896	-0.166157	0.355089	-0.147801						0.129055	-0.104582	-0.0800521	-0.356012	-0.228176	0.355089
YER029C	SMB1	Core Sm protein Sm B; part of heteroheptameric complex (with Smd1p, Smd2p, Smd3p, Sme1p, Smx3p, and Smx2p) that is part of the spliceosomal U1, U2, U4, and U5 snRNPs; homolog of human Sm B and Sm B'	5	commitment complex, U5 snRNP complex, U4/U6 x U5 tri-snRNP complex, U2 snRNP complex, U1 snRNP complex	0.12479	0.166014	0.0502958	0.728503	0.00727825	0.128462	0.0498064	0.0110905	0.233595	0.0745862	-0.0719695	0.148369	-0.0155326	-0.170356	0.232539	0.728503
[truncated: 2,938 more rows]

## Sheet: RNA ubp6∆
YORF	NAME	Dis 1 ubp6 YPD	Dis 2 ubp6 YPD	Dis 5 ubp6 YPD	Dis 8ubp6 YPD	Dis 9 ubp6 YPD	Dis 10 ubp6 YPD	Dis 11 ubp6 YPD	Dis 12 ubp6 YPD	Dis 13 ubp6 YPD	Dis 14 ubp6 YPD	Dis 15 ubp6 YPD	Dis 16 ubp6 YPD
[truncated: 6,175 more rows]
