# Supplementary material for: Quantitative proteomic analysis reveals posttranslational responses to aneuploidy in yeast
Source: eLife journal article supplement (doi:10.7554/elife.03023), 2014-07-29
Supplement: supp [file elife-03023-supp-v1.zip › elife_poa_e03023_Figure_8_source_data_1.xlsx]

## Sheet: Sheet1
Table S8. Strains Utilized
Wild-type
Strain Number	Genotype
E187	MATa, ade2-1, leu2-3, ura3, trp1-1, his3-11, 15, can1-100, GAL, psi+
Strains Utilized for SILAC Mass Spectroscopy
Strain Number	Disomic for Chromosome	Relevant Genotype
E113	WT	MATa, ade1::HIS3, lys2::KanMX6
E214	I	MATa, ade1::HIS3, ade1::KanMX6, lys2::URA3
E89	II	MATa, lys2::HIS3, lys2::KanMX6
E216	V	MATa, can1::HIS3, intergenic region (187520-187620) between YER015W and YER016W::KanMX6, lys2::URA3
E217	VIII	MATa, intergenic region (119778-119573) between YHR006W and YHR007C::HIS3, intergenic region (119778-119573) between YHR006W and YHR007C::KanMX6, lys2::URA3
E218	IX	MATa, intergenic region (341900-34200) between YIL009W and YIL008W::HIS3, intergenic region (341900-34200) between YIL009W and YIL008W::KanMX6, lys2::URA3
E219	X	MATa, intergenic region (322250-322350) between YJL061W and YJL060W::HIS3, intergenic region (322250-322350) between YJL061W and YJL060W::KanMX6, lys2::URA3
E220	XI	MATa, intergenic region (430900-431000) between YKL006C-A and YKL006W::HIS3, intergenic region (430900-431000) between YKL006C-A and YKL006W::KanMX6, lys2::URA3
E221	XII	MATa, ade16::HIS3, ade16::KanMX6, lys2::URA3
E222	XIII	MATa, intergenic region (309200-309300) between YMR017W and YMR018W::HIS3, intergenic region (309200-309300) between YMR017W and YMR018W::KanMX6, lys2::URA3
E223	XIV	MATa, intergenic region (622880-622980) between YNL005C and YNL004W::HIS3, intergenic region (622880-622980) between YNL005C and YNL004W::KanMX6, lys2::URA3
E224	XV	MATa, leu9::HIS3, leu9::KanMX6, lys2::URA3
E225	XVI	MATa, met12::HIS3, met12::KanMX6, lys2::URA3
Strains Utilized for TMT Mass Spectroscopy
Strain Number	Disomic for Chromosome	Relevant Genotype
E192	WT	MATa, ade1::HIS3, lys2::KanMX6, intergenic region (181900-182000) between YFR016C and YFR017C:: CaURA3
E193	I	MATa, ade1::HIS3, ade1::KanMX6, intergenic region (181900-182000) between YFR016C and YFR017C:: CaURA3
E194	II	MATa, lys2::HIS3, lys2::KanMX6, intergenic region (181900-182000) between YFR016C and YFR017C:: CaURA3
E196	V	MATa, can1::HIS3, intergenic region (187520-187620) between YER015W and YER016W::KanMX6, intergenic region (181900-182000) between YFR016C and YFR017C:: CaURA3
E197	VIII	MATa, intergenic region (119778-119573) between YHR006W and YHR007C::HIS3, intergenic region (119778-119573) between YHR006W and YHR007C::KanMX6, intergenic region (181900-182000) between YFR016C and YFR017C:: CaURA3
E198	IX	MATa, intergenic region (341900-34200) between YIL009W and YIL008W::HIS3, intergenic region (341900-34200) between YIL009W and YIL008W::KanMX6, intergenic region (181900-182000) between YFR016C and YFR017C:: CaURA3
E199	X	MATa, intergenic region (322250-322350) between YJL061W and YJL060W::HIS3, intergenic region (322250-322350) between YJL061W and YJL060W::KanMX6, intergenic region (181900-182000) between YFR016C and YFR017C:: CaURA3
E200	XI	MATa, intergenic region (430900-431000) between YKL006C-A and YKL006W::HIS3, intergenic region (430900-431000) between YKL006C-A and YKL006W::KanMX6, intergenic region (181900-182000) between YFR016C and YFR017C:: CaURA3
E201	XII	MATa, ade16::HIS3, ade16::KanMX6, intergenic region (181900-182000) between YFR016C and YFR017C:: CaURA3
E202	XIII	MATa, intergenic region (309200-309300) between YMR017W and YMR018W::HIS3, intergenic region (309200-309300) between YMR017W and YMR018W::KanMX6, intergenic region (181900-182000) between YFR016C and YFR017C:: CaURA3
E203	XIV	MATa, intergenic region (622880-622980) between YNL005C and YNL004W::HIS3, intergenic region (622880-622980) between YNL005C and YNL004W::KanMX6, intergenic region (181900-182000) between YFR016C and YFR017C:: CaURA3
E204	XV	MATa, leu9::HIS3, leu9::KanMX6, intergenic region (181900-182000) between YFR016C and YFR017C::CaURA3
E205	XVI	MATa, met12::HIS3, met12::KanMX6, intergenic region (181900-182000) between YFR016C and YFR017C:: CaURA3
ubp6∆ Strains Utilized for TMT Mass Spectroscopy
Strain Number	Disomic for Chromosome	Relevant Genotype
E307	I	MATa, ade1::HIS3, ade1::KanMX6, ubp6::CaURA3
E308	II	MATa, lys2::HIS3, lys2::KanMX6, ubp6::CaURA3
E310	V	MATa, can1::HIS3, intergenic region (187520-187620) between YER015W and YER016W::KanMX6, ubp6::CaURA3
E311	VIII	MATa, intergenic region (119778-119573) between YHR006W and YHR007C::HIS3, intergenic region (119778-119573) between YHR006W and YHR007C::KanMX6, ubp6::CaURA3
E312	IX	MATa, intergenic region (341900-34200) between YIL009W and YIL008W::HIS3, intergenic region (341900-34200) between YIL009W and YIL008W::KanMX6, ubp6::CaURA3
E313	X	MATa, intergenic region (322250-322350) between YJL061W and YJL060W::HIS3, intergenic region (322250-322350) between YJL061W and YJL060W::KanMX6, ubp6::CaURA3
E314	XI	MATa, intergenic region (430900-431000) between YKL006C-A and YKL006W::HIS3, intergenic region (430900-431000) between YKL006C-A and YKL006W::KanMX6, ubp6::CaURA3
E315	XII	MATa, ade16::HIS3, ade16::KanMX6, ubp6::CaURA3
E316	XIII	MATa, intergenic region (309200-309300) between YMR017W and YMR018W::HIS3, intergenic region (309200-309300) between YMR017W and YMR018W::KanMX6, ubp6::CaURA3
E317	XIV	MATa, intergenic region (622880-622980) between YNL005C and YNL004W::HIS3, intergenic region (622880-622980) between YNL005C and YNL004W::KanMX6, ubp6::CaURA3
E318	XV	MATa, leu9::HIS3, leu9::KanMX6, ubp6::CaURA3
E319	XVI	MATa, met12::HIS3, met12::KanMX6, ubp6::CaURA3
