# Supplementary figures and images for: Quantitative proteomic analysis reveals posttranslational responses to aneuploidy in yeast
Source: eLife journal article supplement (doi:10.7554/elife.03023), 2014-07-29

Figure 1-figure supplement 1

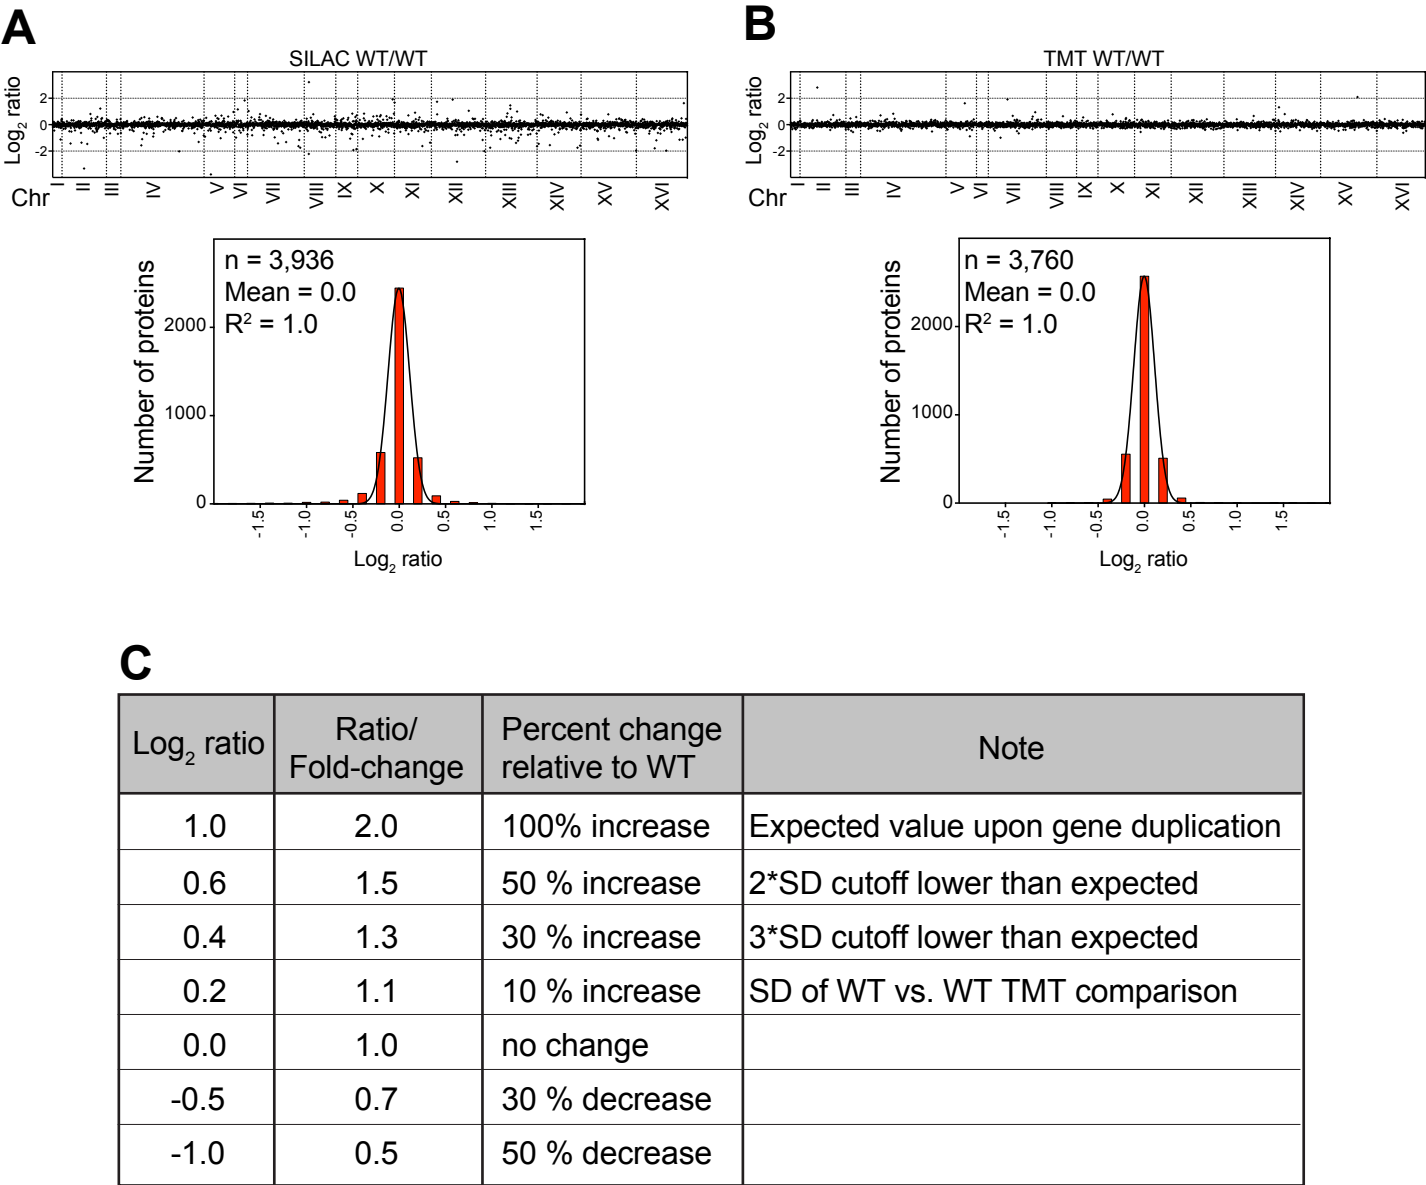

SD = Standard deviation of the mean

Supplement: supp [file elife-03023-supp-v1.zip]

Figure 7-figure supplement 1

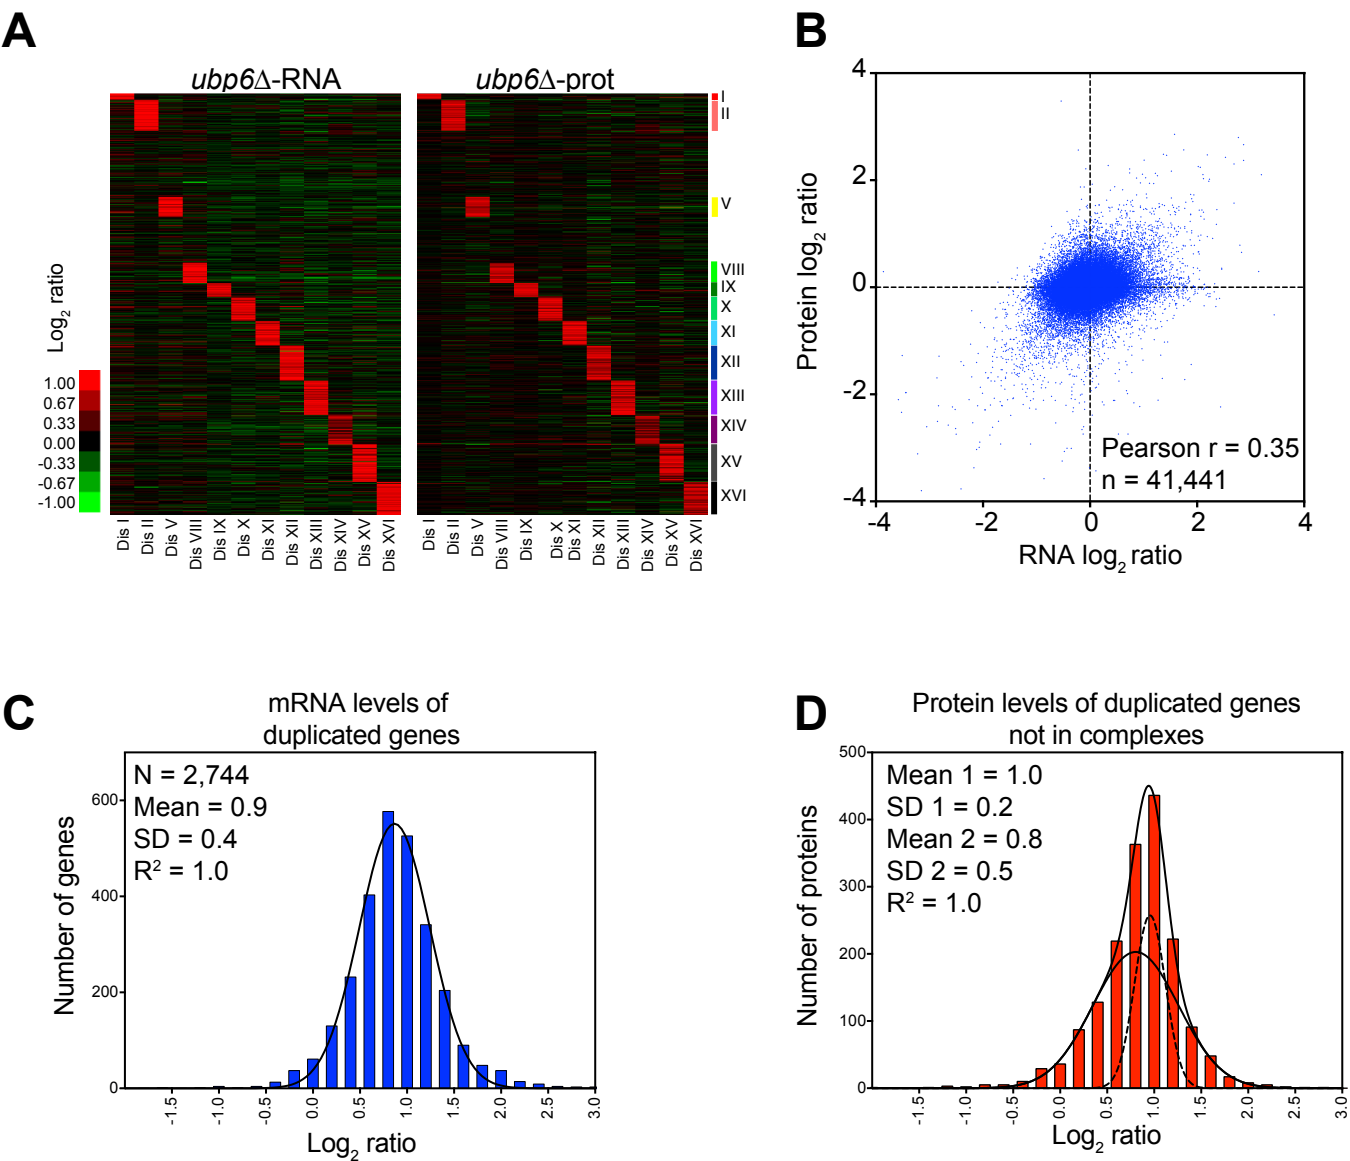

Supplement: supp [file elife-03023-supp-v1.zip]

## Figure 1-figure supplement 2

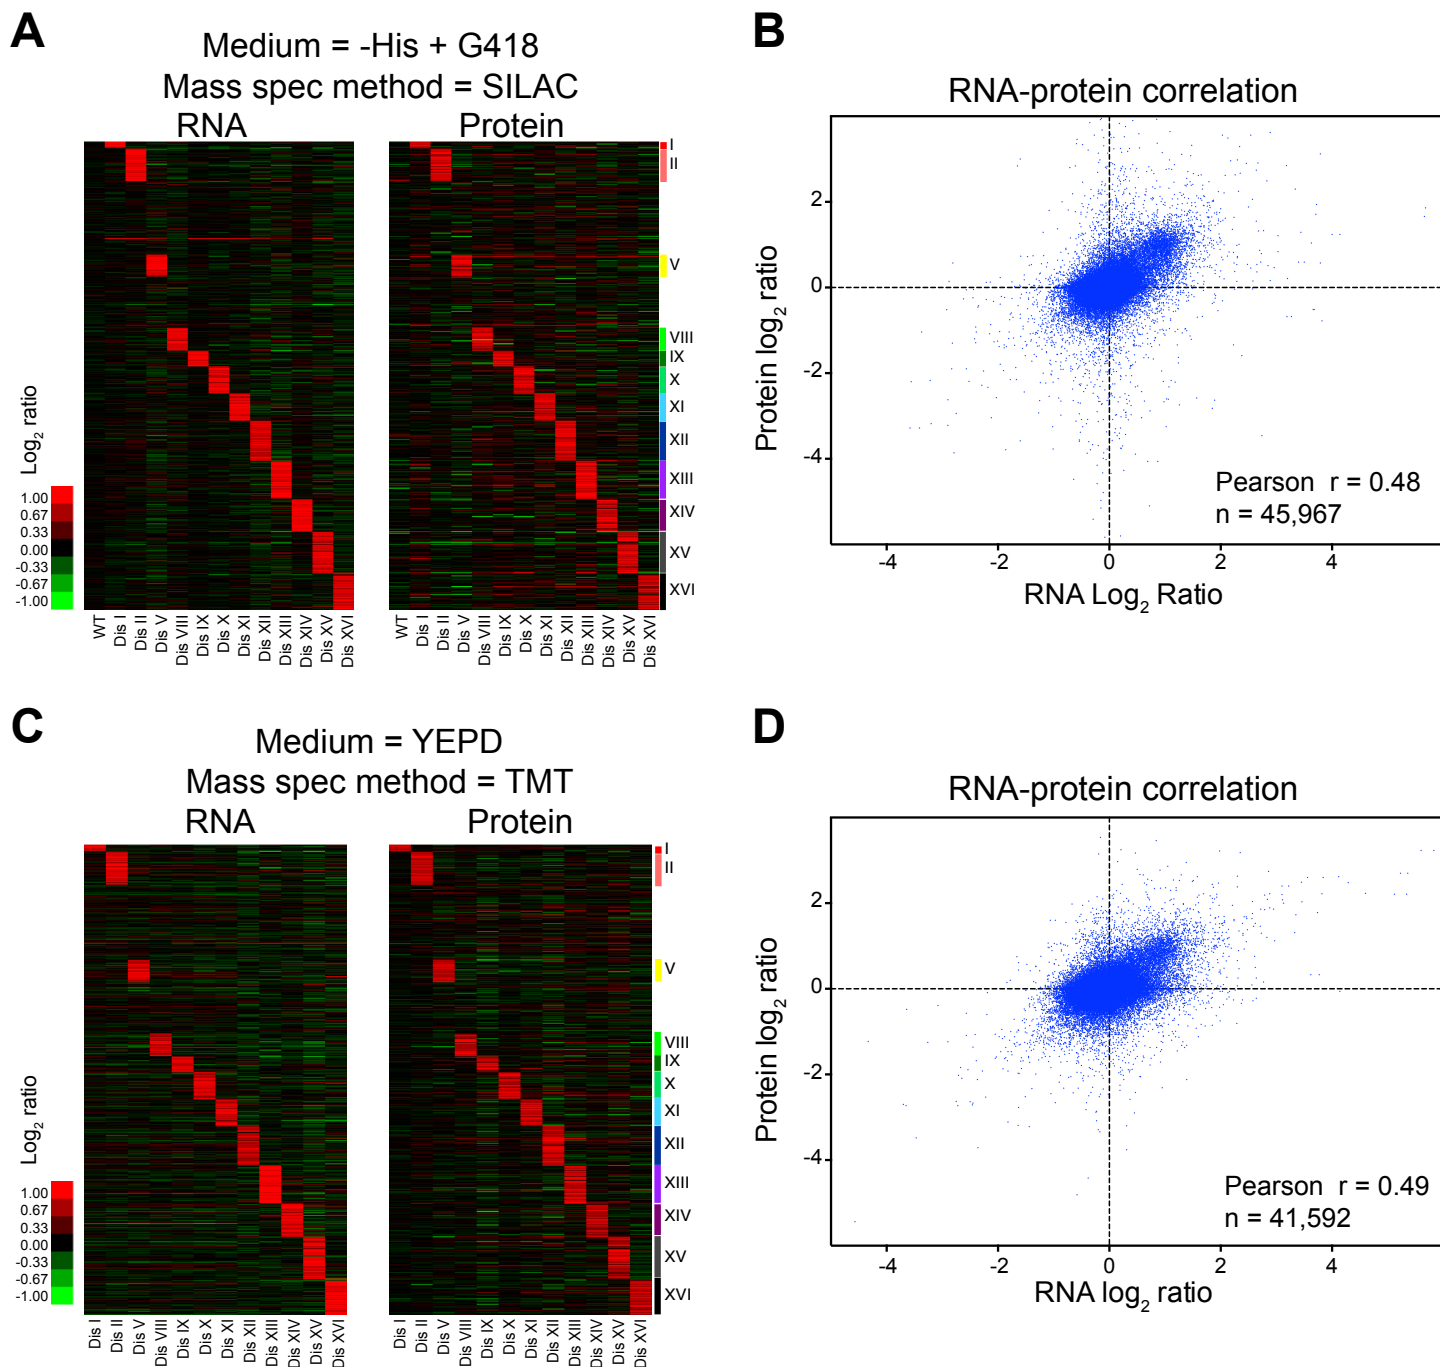

Supplement: supp [file elife-03023-supp-v1.zip]

## Figure 6-figure supplement 1

**A**

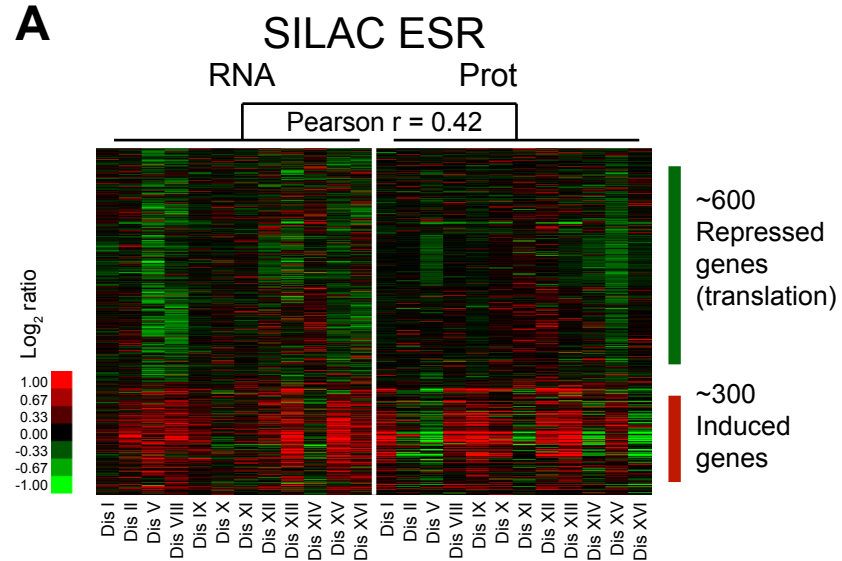

**B**

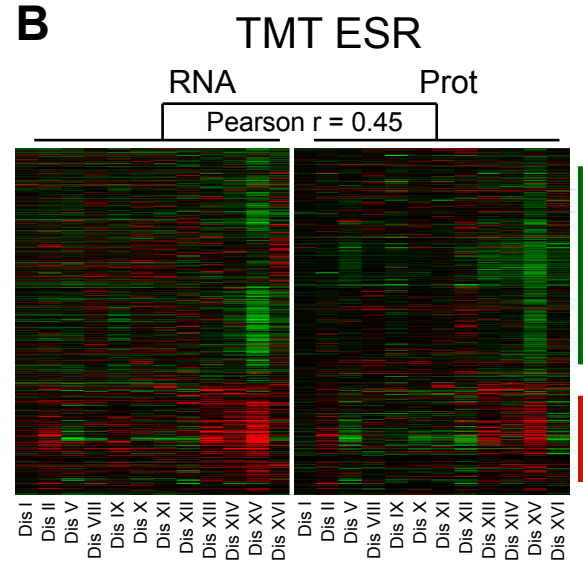

Supplement: supp [file elife-03023-supp-v1.zip]

Figure 6-figure supplement 3

A

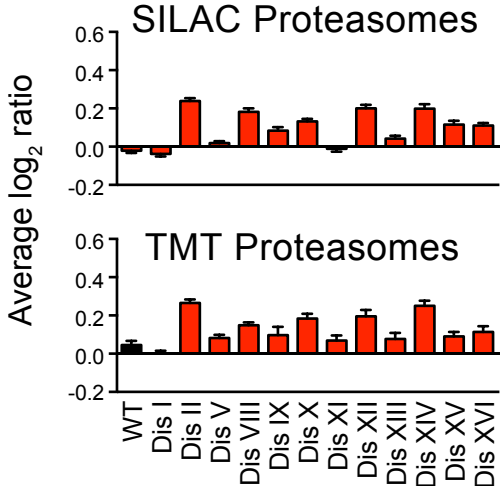

B

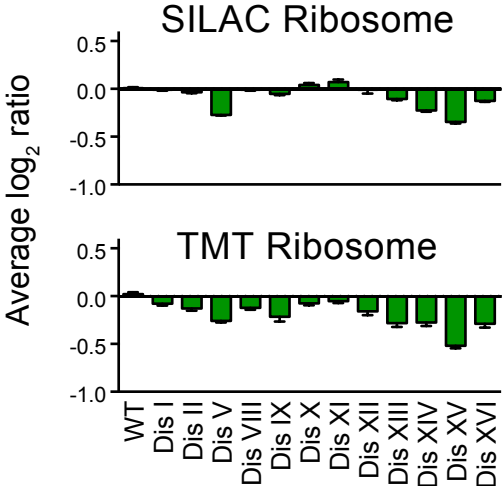

Supplement: supp [file elife-03023-supp-v1.zip › elife_poa_e03023_Figure_6_figure_supplement_3.pdf]

## Figure 8-figure supplement 1

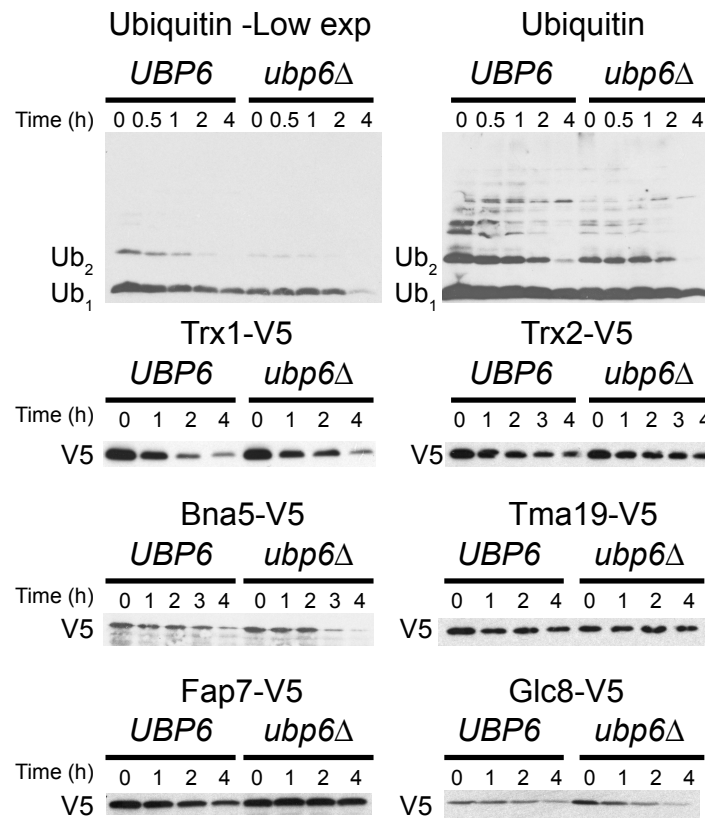

Supplement: supp [file elife-03023-supp-v1.zip › elife_poa_e03023_Figure_8_figure_supplement_1.pdf]

Figure 2-figure supplement 1

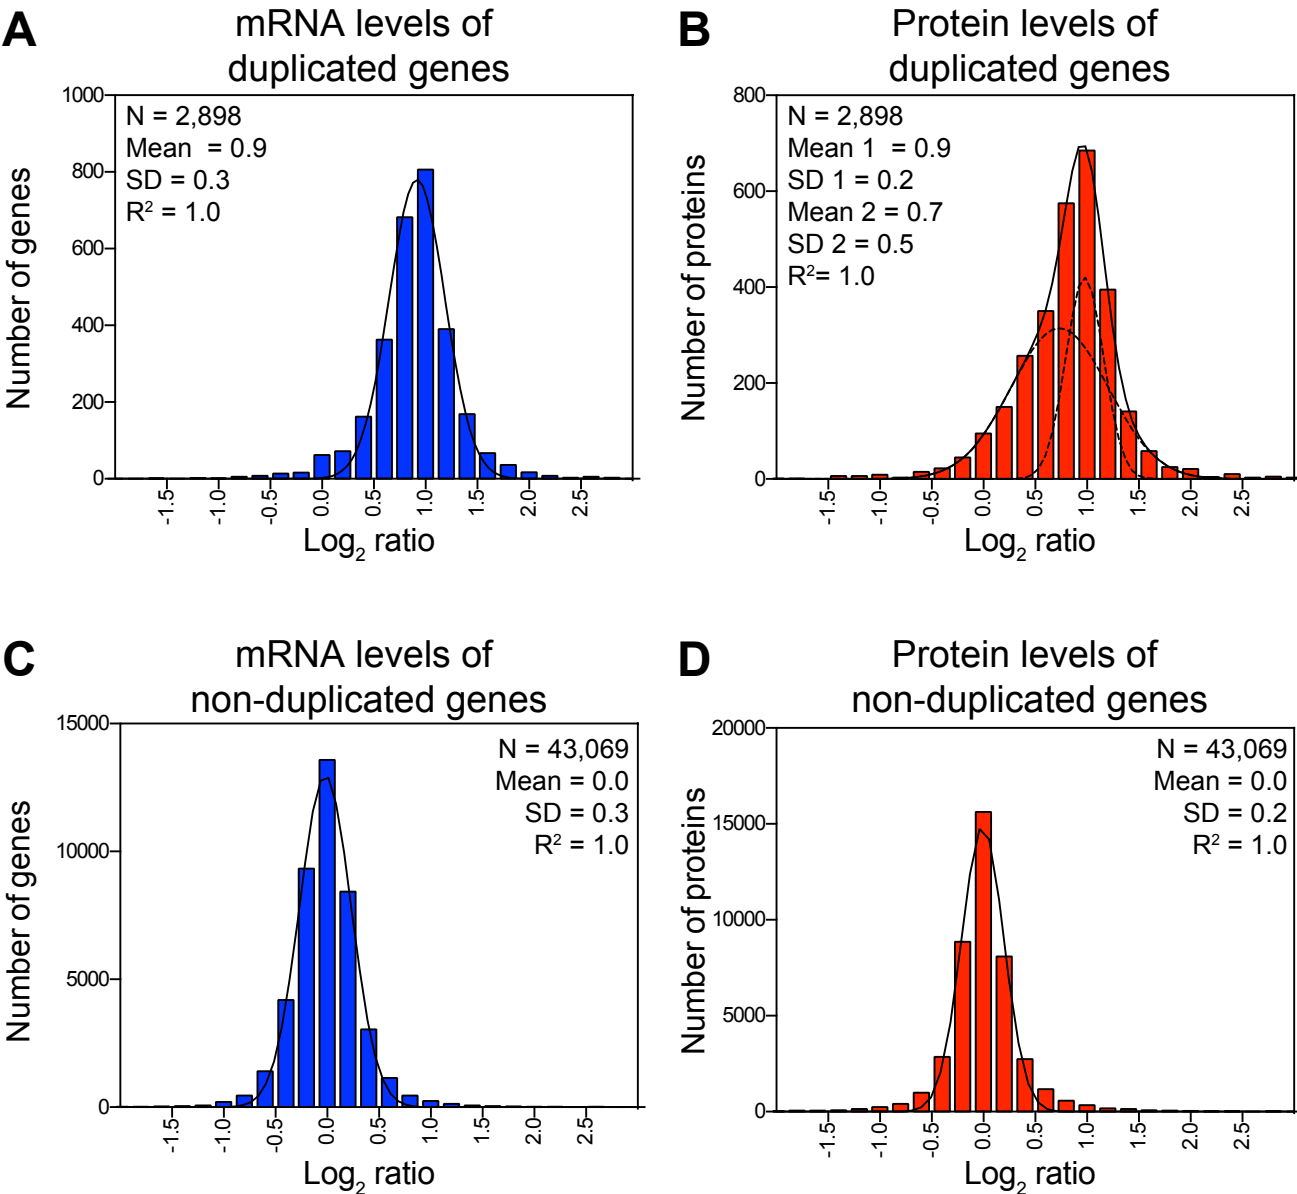

Supplement: supp [file elife-03023-supp-v1.zip › elife_poa_e03023_Figure_2_figure_supplement_1.pdf]

## Figure 3-figure supplement 2

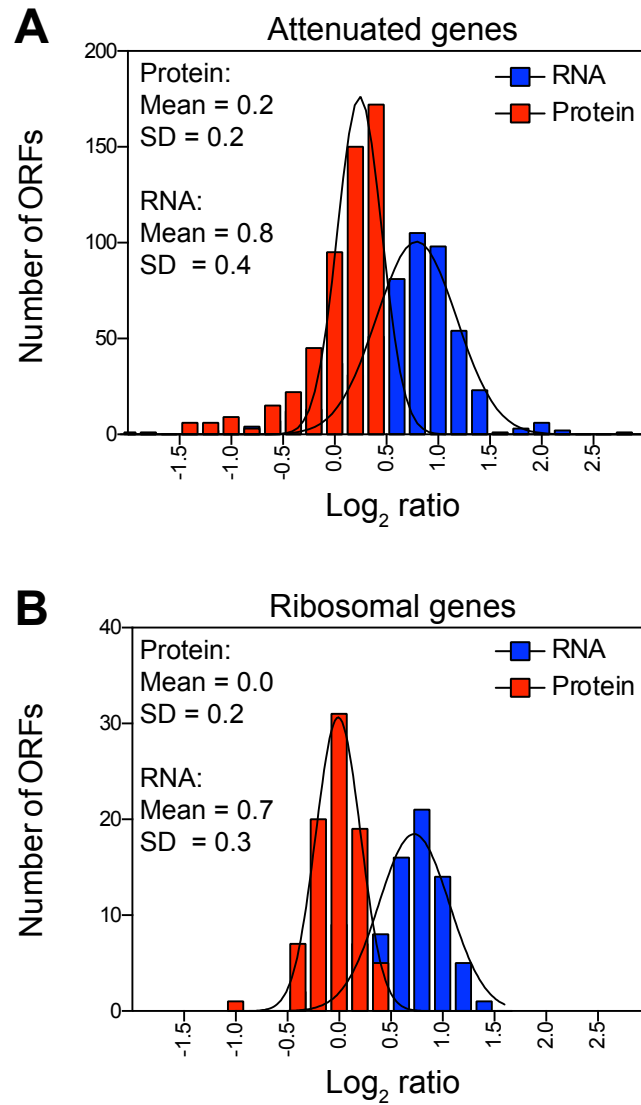

Supplement: supp [file elife-03023-supp-v1.zip › elife_poa_e03023_Figure_3_figure_supplement_2.pdf]

**Figure 4- Supplement 1**

**A**

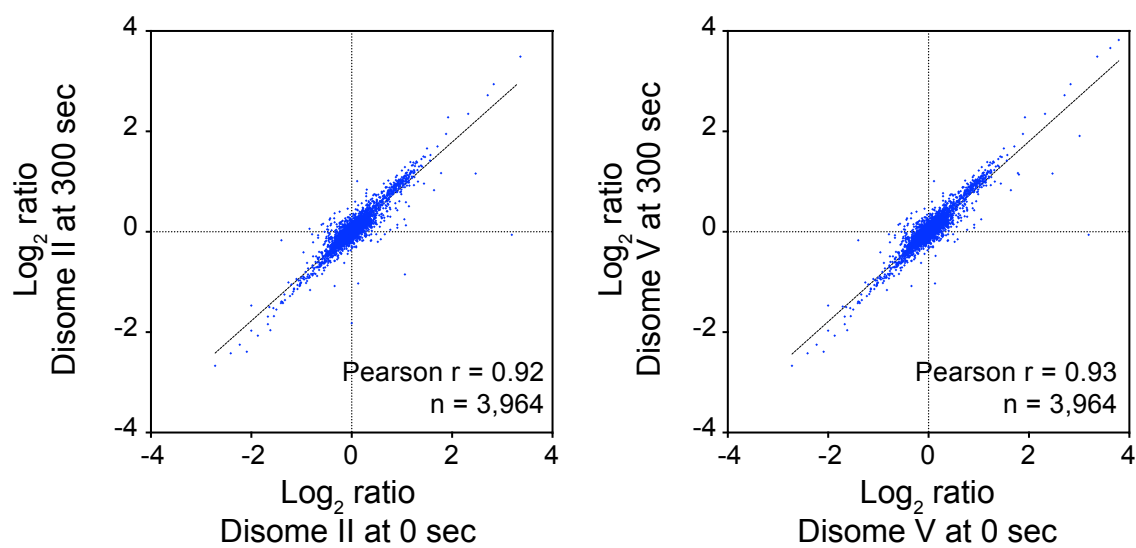

**B**

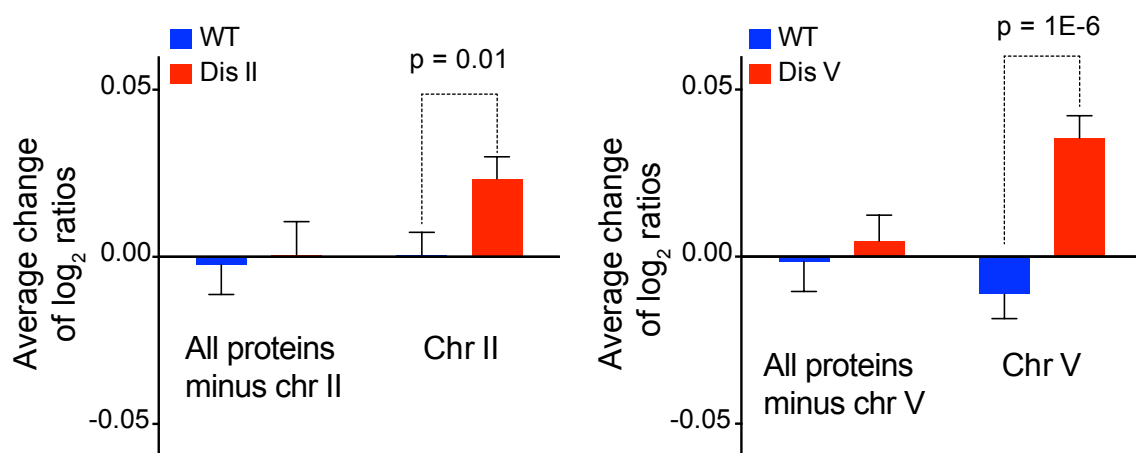

Supplement: supp [file elife-03023-supp-v1.zip › elife_poa_e03023_Figure_4_figure_supplement_1.pdf]

**Figure 6-figure supplement 2**

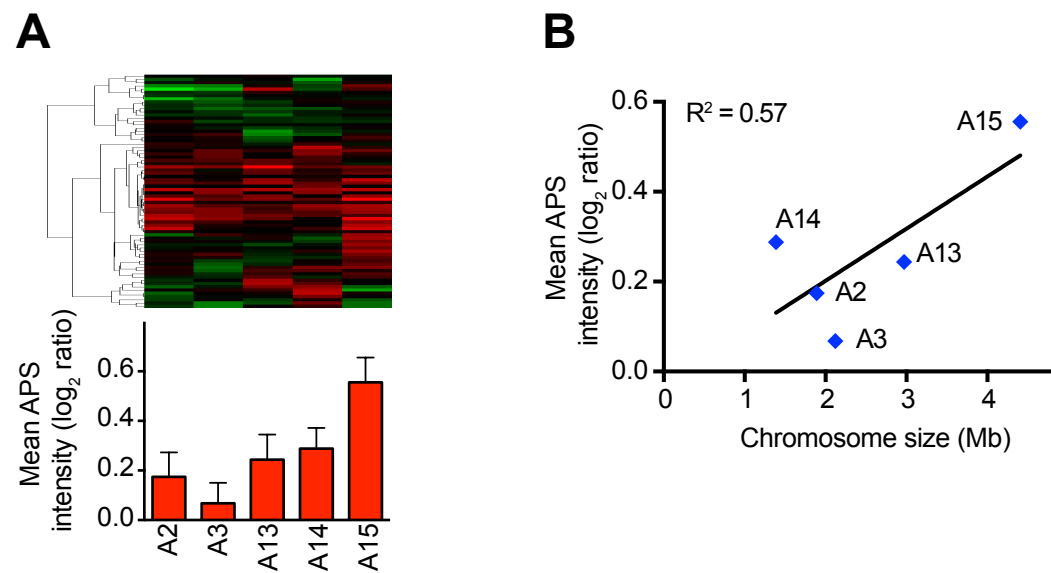

Supplement: supp [file elife-03023-supp-v1.zip › elife_poa_e03023_Figure_6_figure_supplement_2.pdf]

Figure 7-figure supplement 2

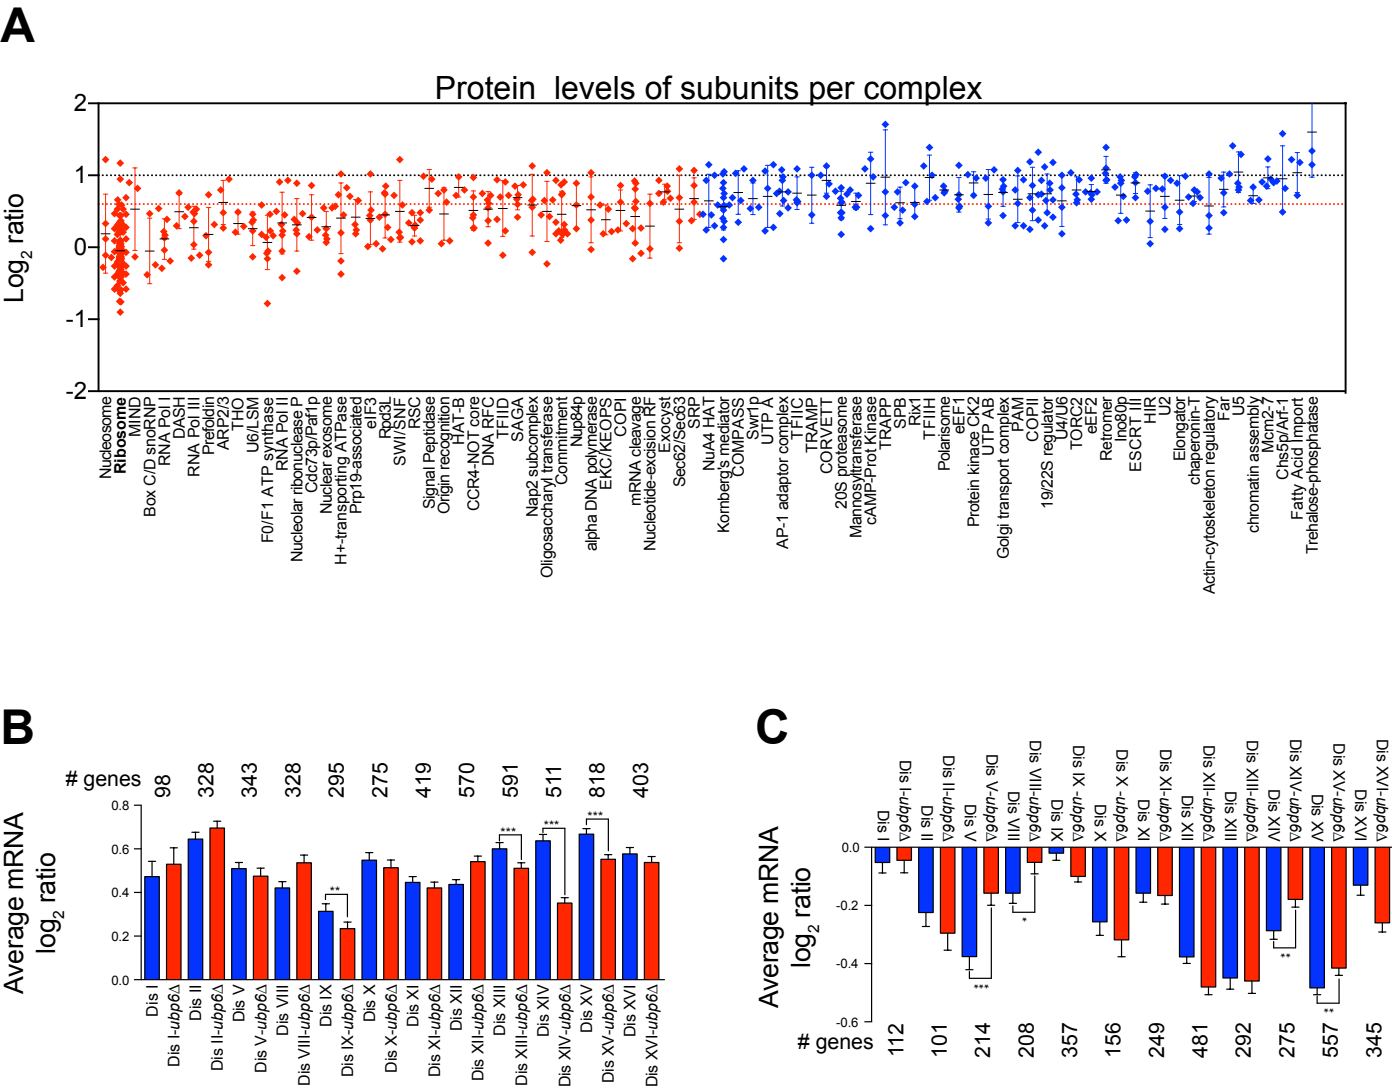

Supplement: supp [file elife-03023-supp-v1.zip › elife_poa_e03023_Figure_7_figure_supplement_2.pdf]

# Figure 6-figure supplement 4

**A**

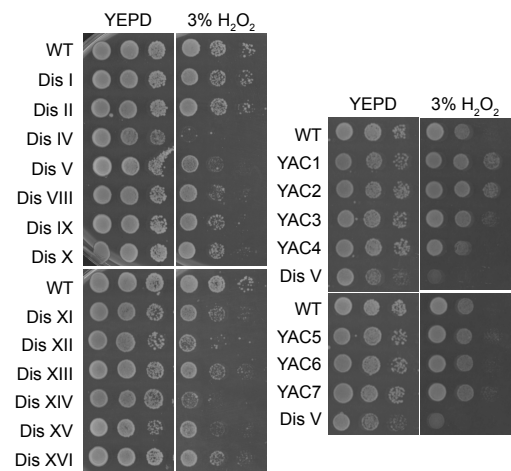

**B**

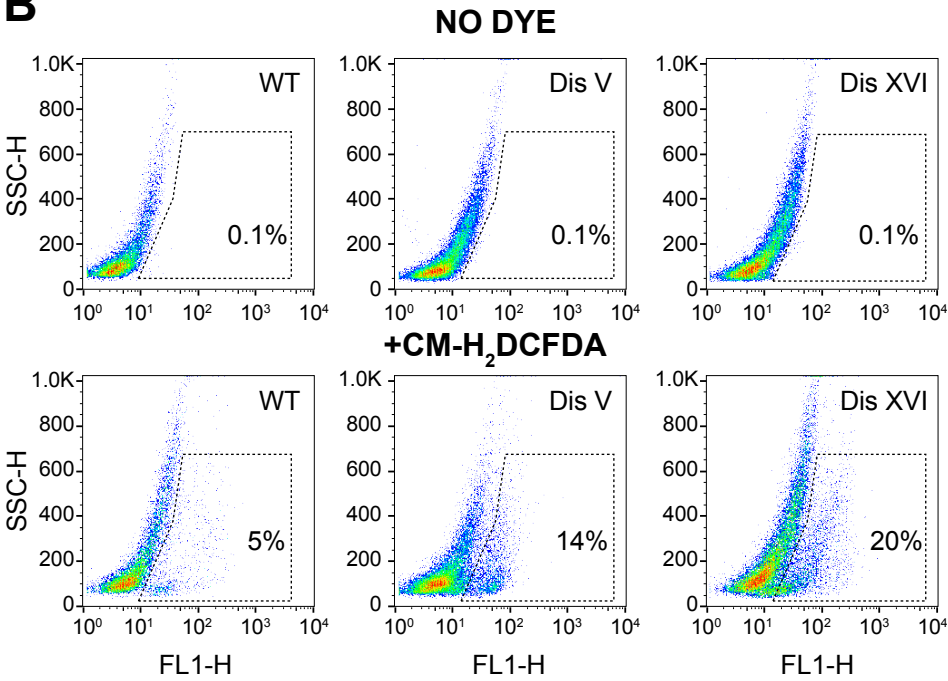

Supplement: supp [file elife-03023-supp-v1.zip › elife_poa_e03023_Figure_6_figure_supplement_4.pdf]

Figure 8-figure supplement 2

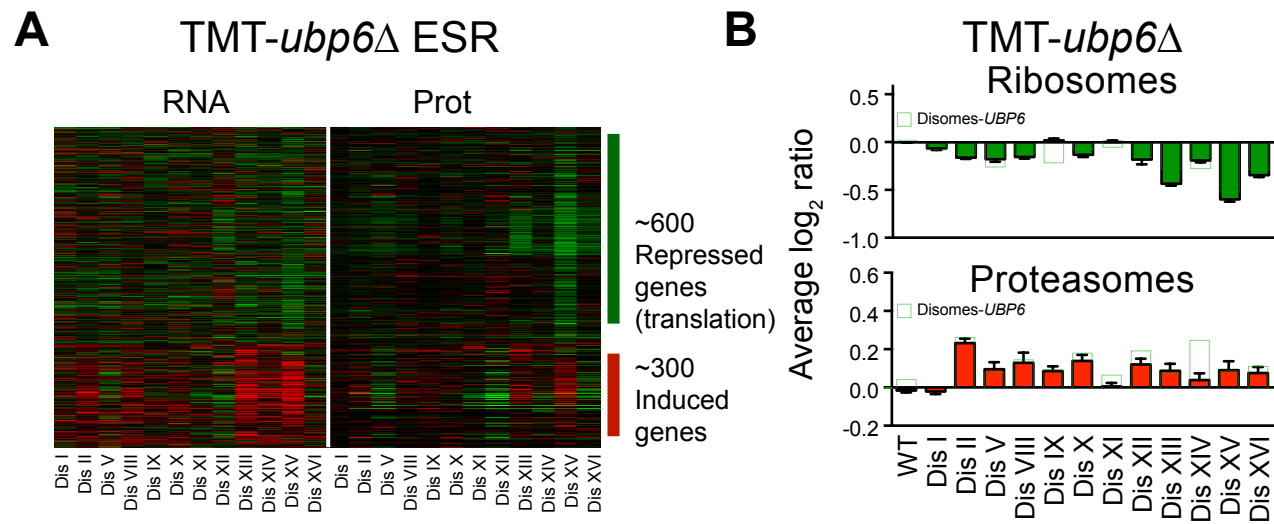

Supplement: supp [file elife-03023-supp-v1.zip › elife_poa_e03023_Figure_8_figure_supplement_2.pdf]

Figure 3-figure supplement 1

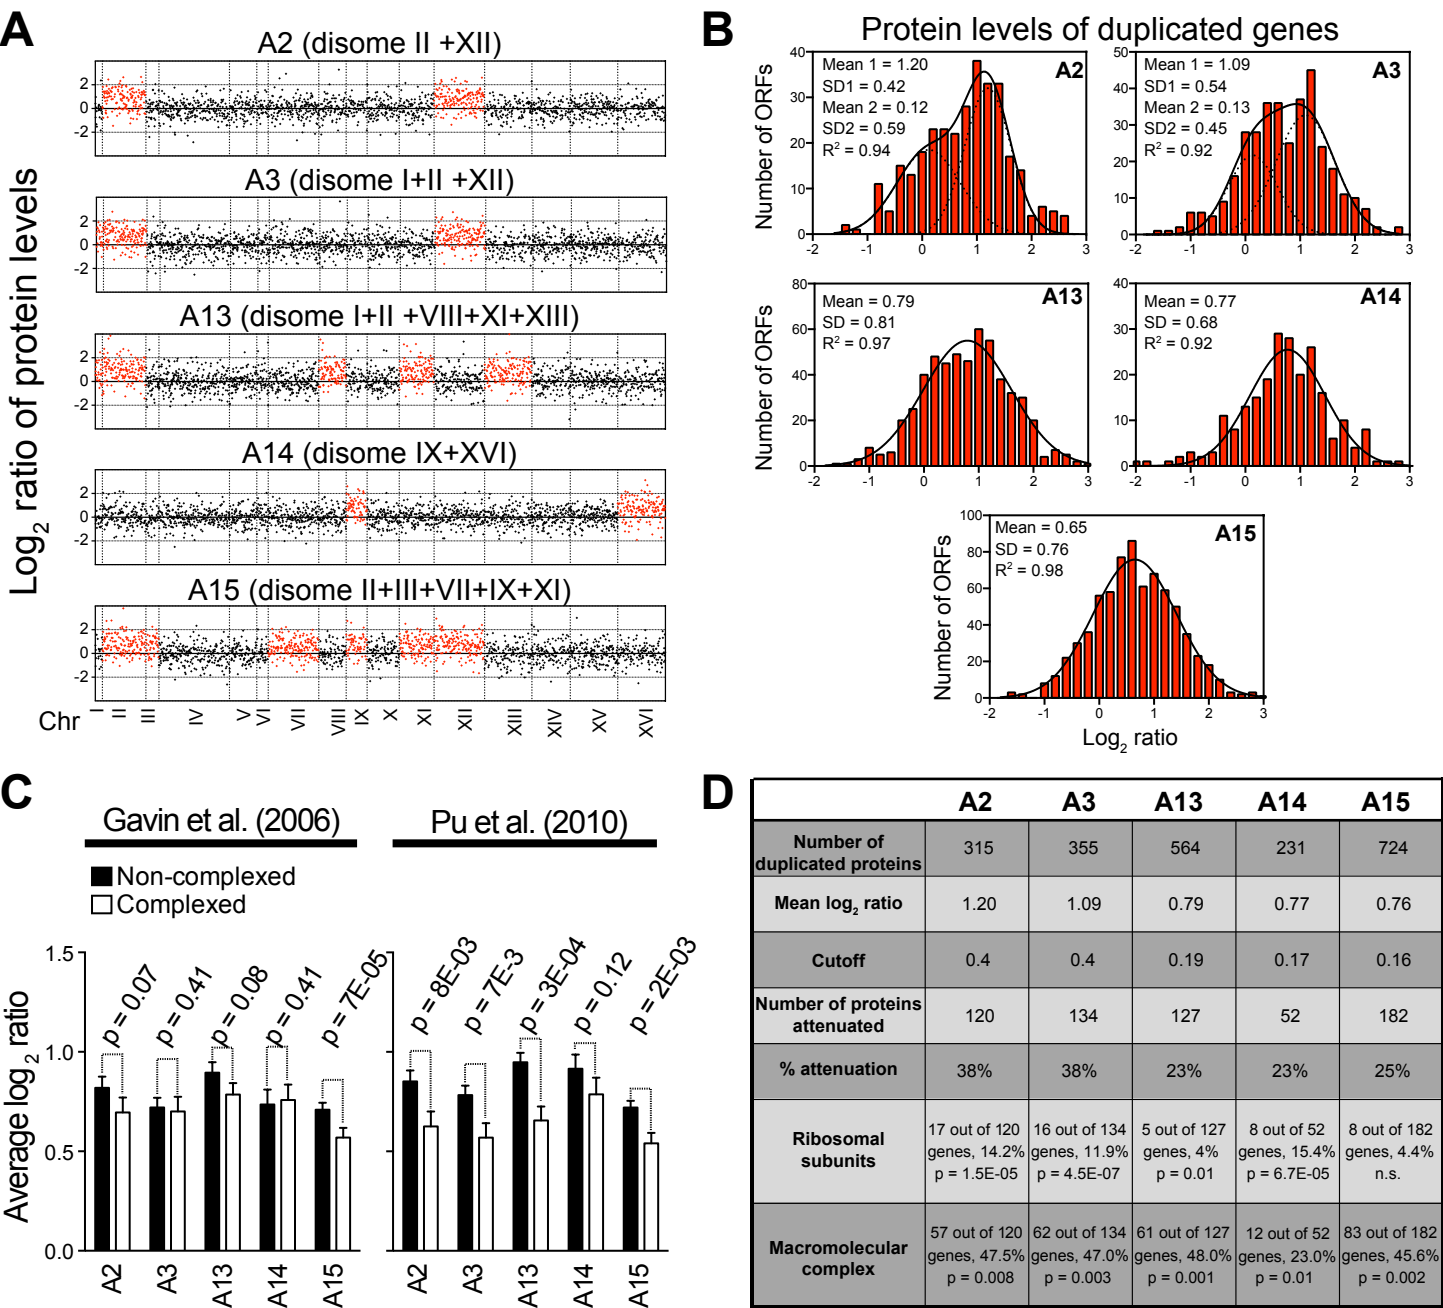

Supplement: supp [file elife-03023-supp-v1.zip › elife_poa_e03023_Figure_3_figure_supplement_1.pdf]
